# Supplementary material for: Mako: A Graph-based Pattern Growth Approach to Detect Complex Structural Variants
Source: PubMed Central journal article supplement (PMC9510932; doi:10.1016/j.gpb.2021.03.007), 2021-07-03

Dotplot used for manually inspection of  
CSVs from HG00733

➤ chr1\_1030460\_1030901

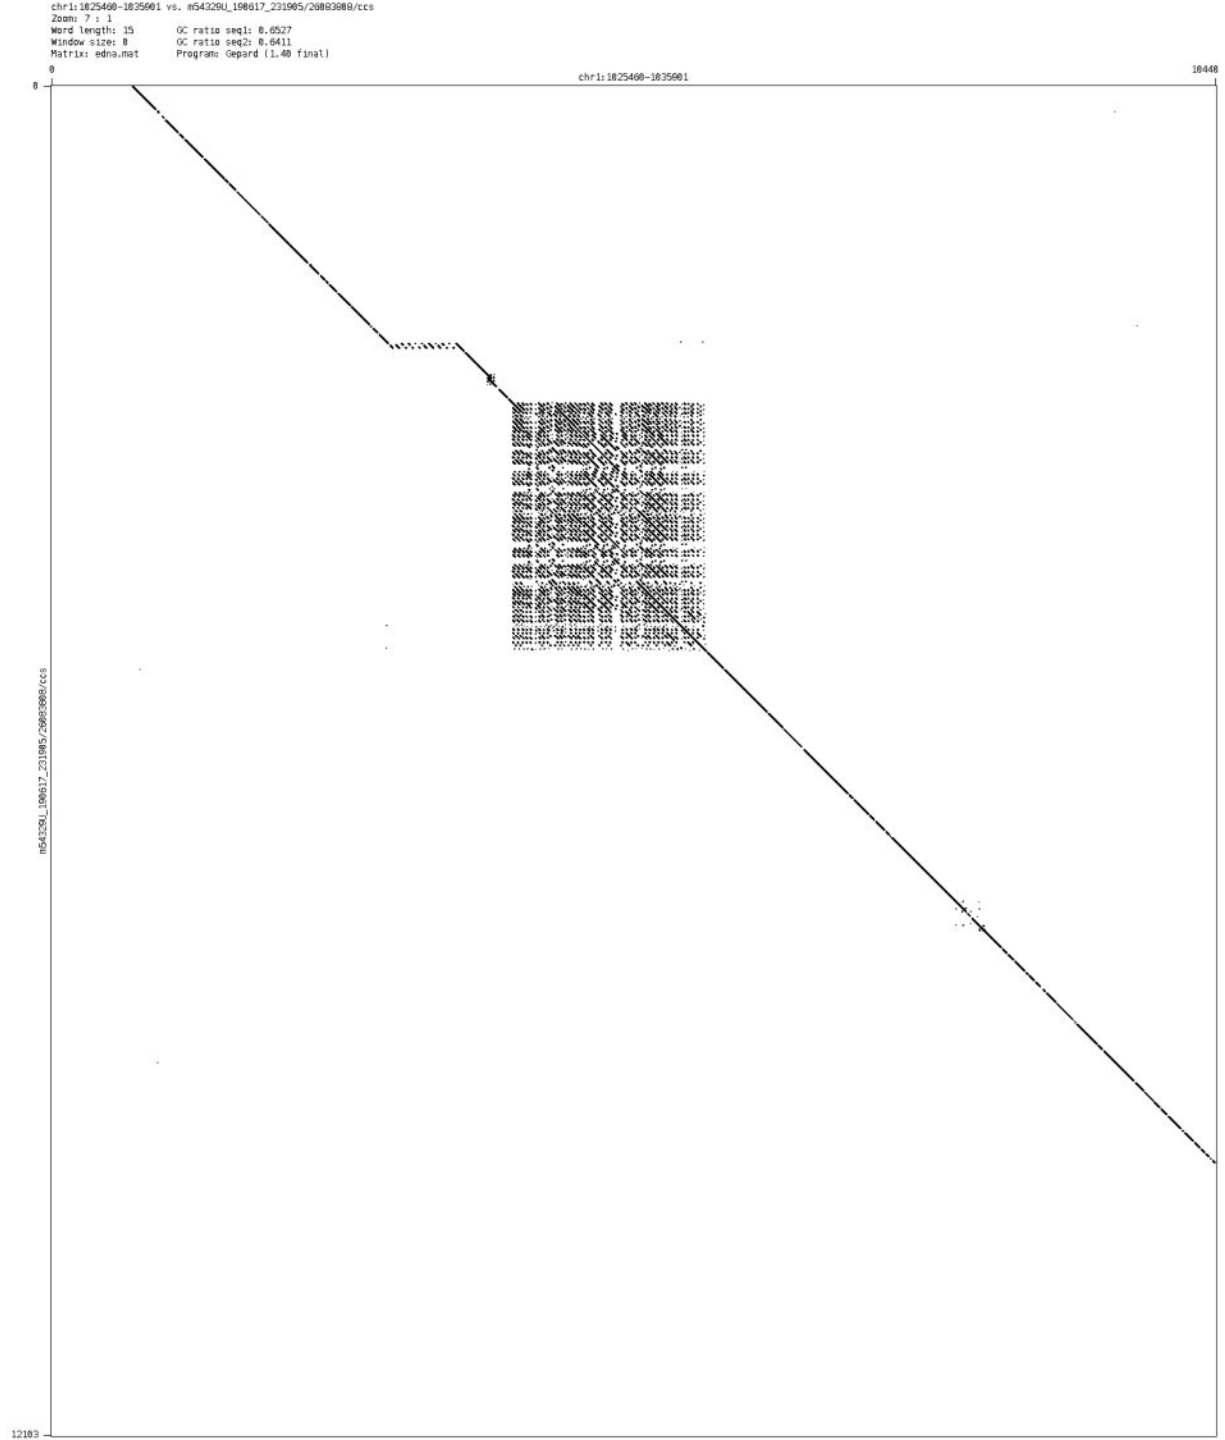

➤ chr1\_1382295\_1382470

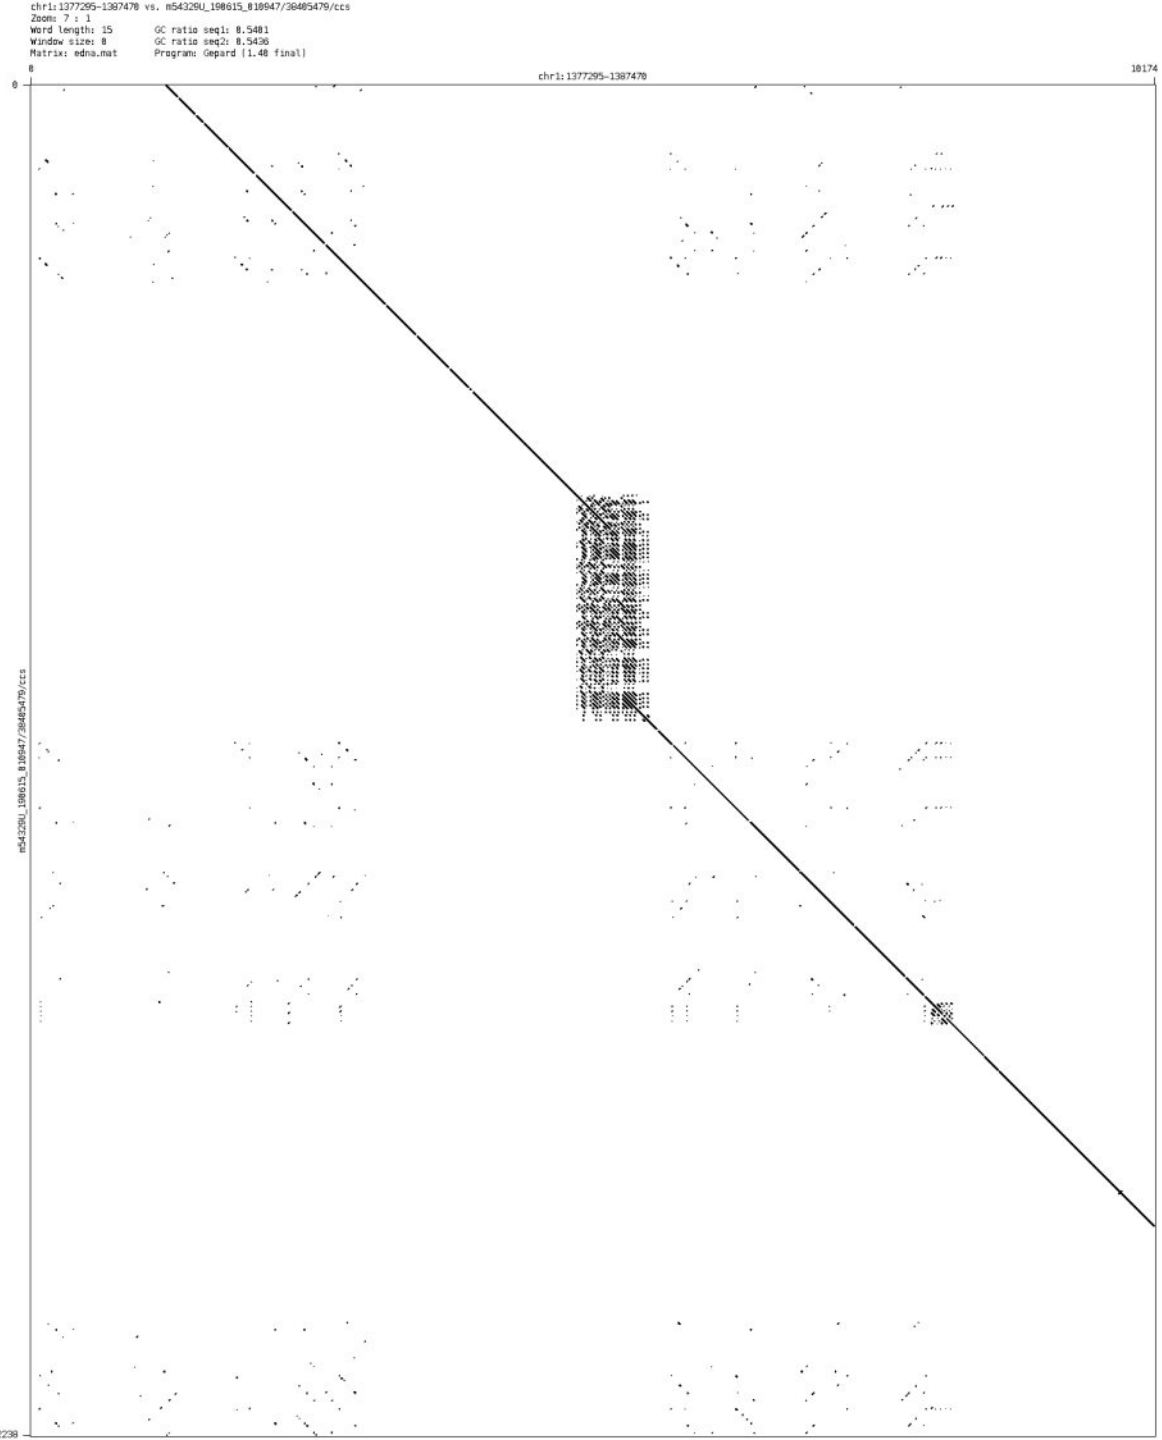

➤ chr1\_2440414\_2440528

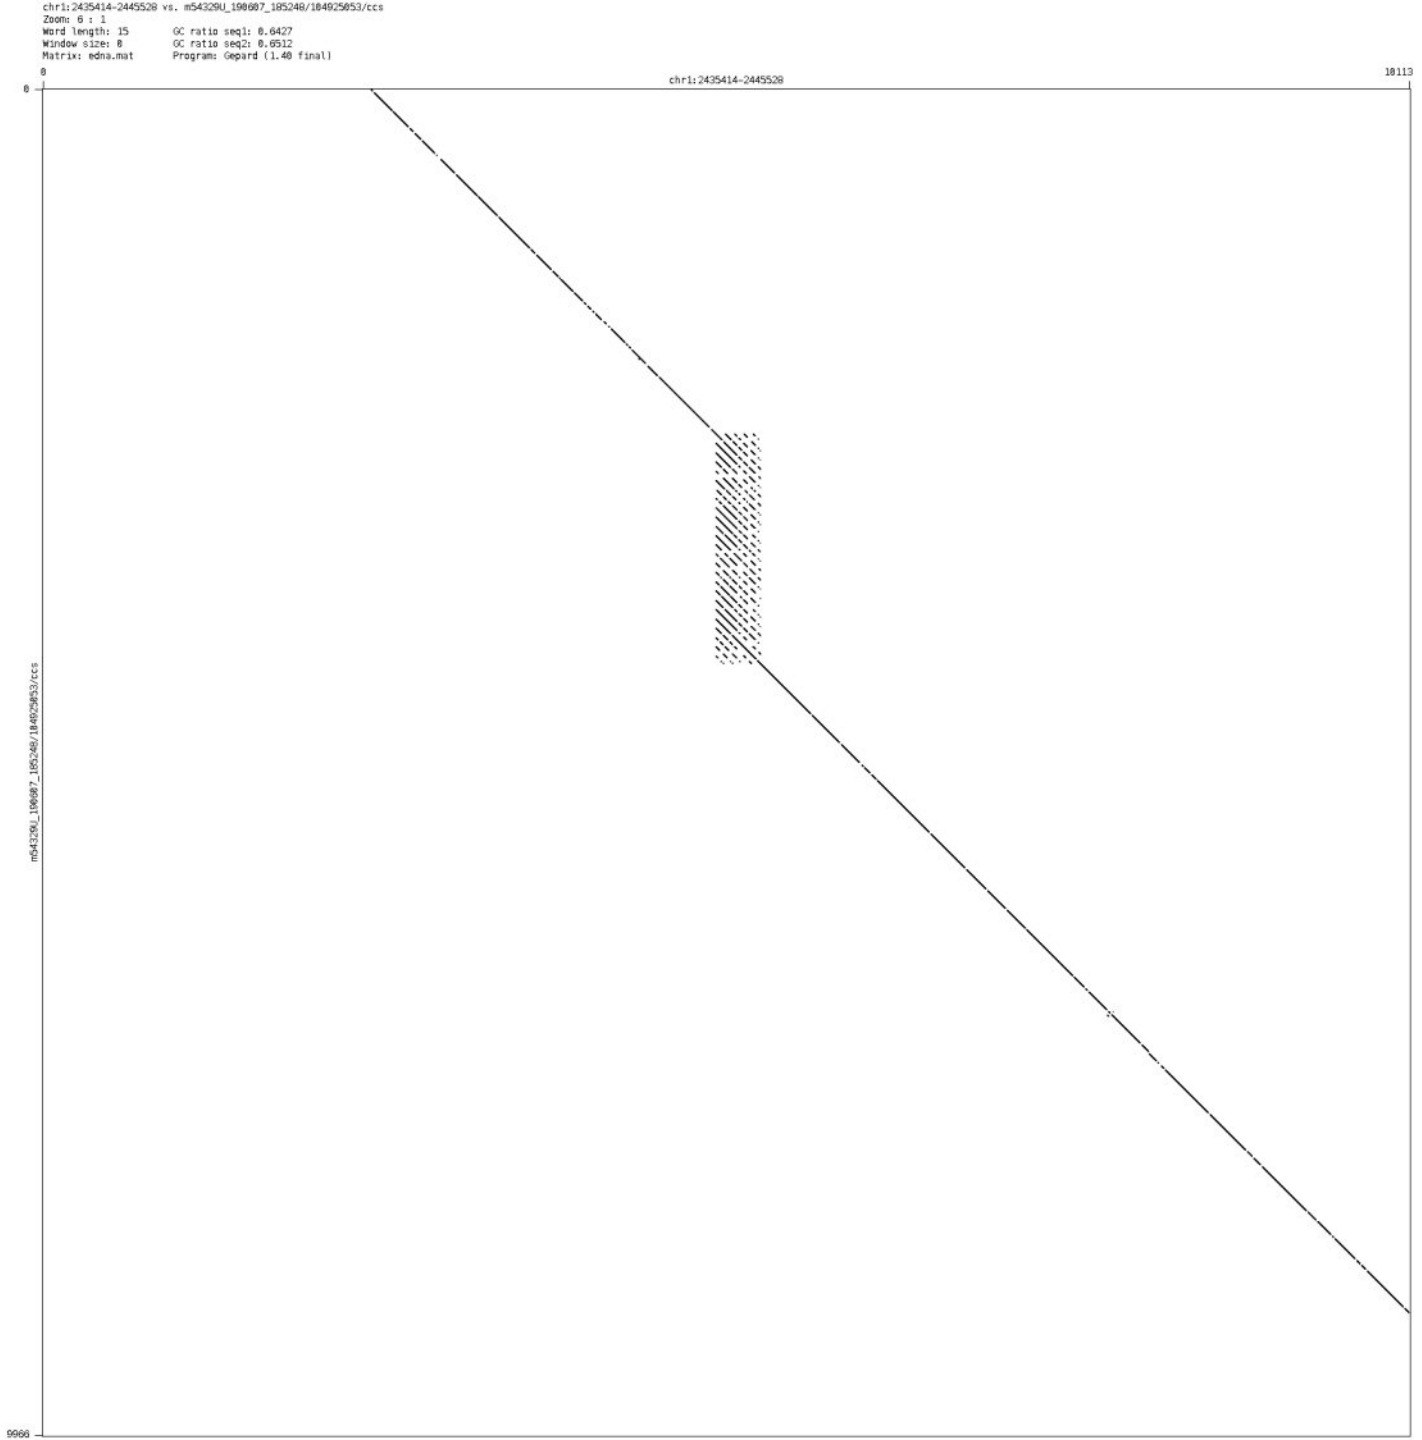



➤ chr1\_2849326\_2849465

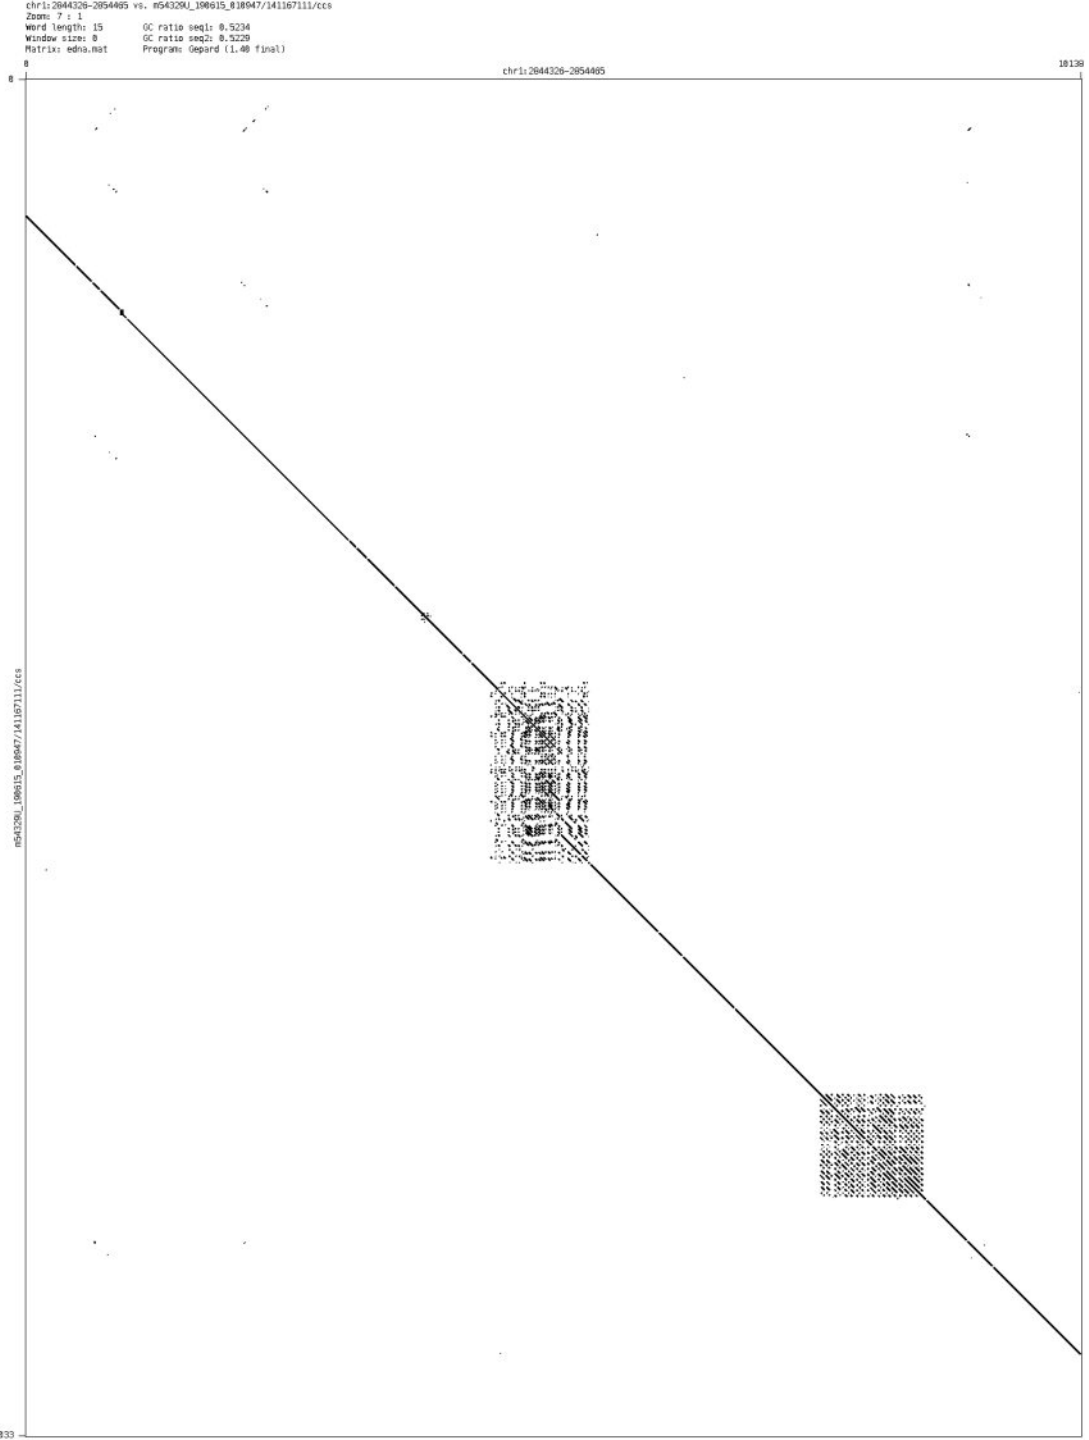

➤ chr1\_3212601\_3212686

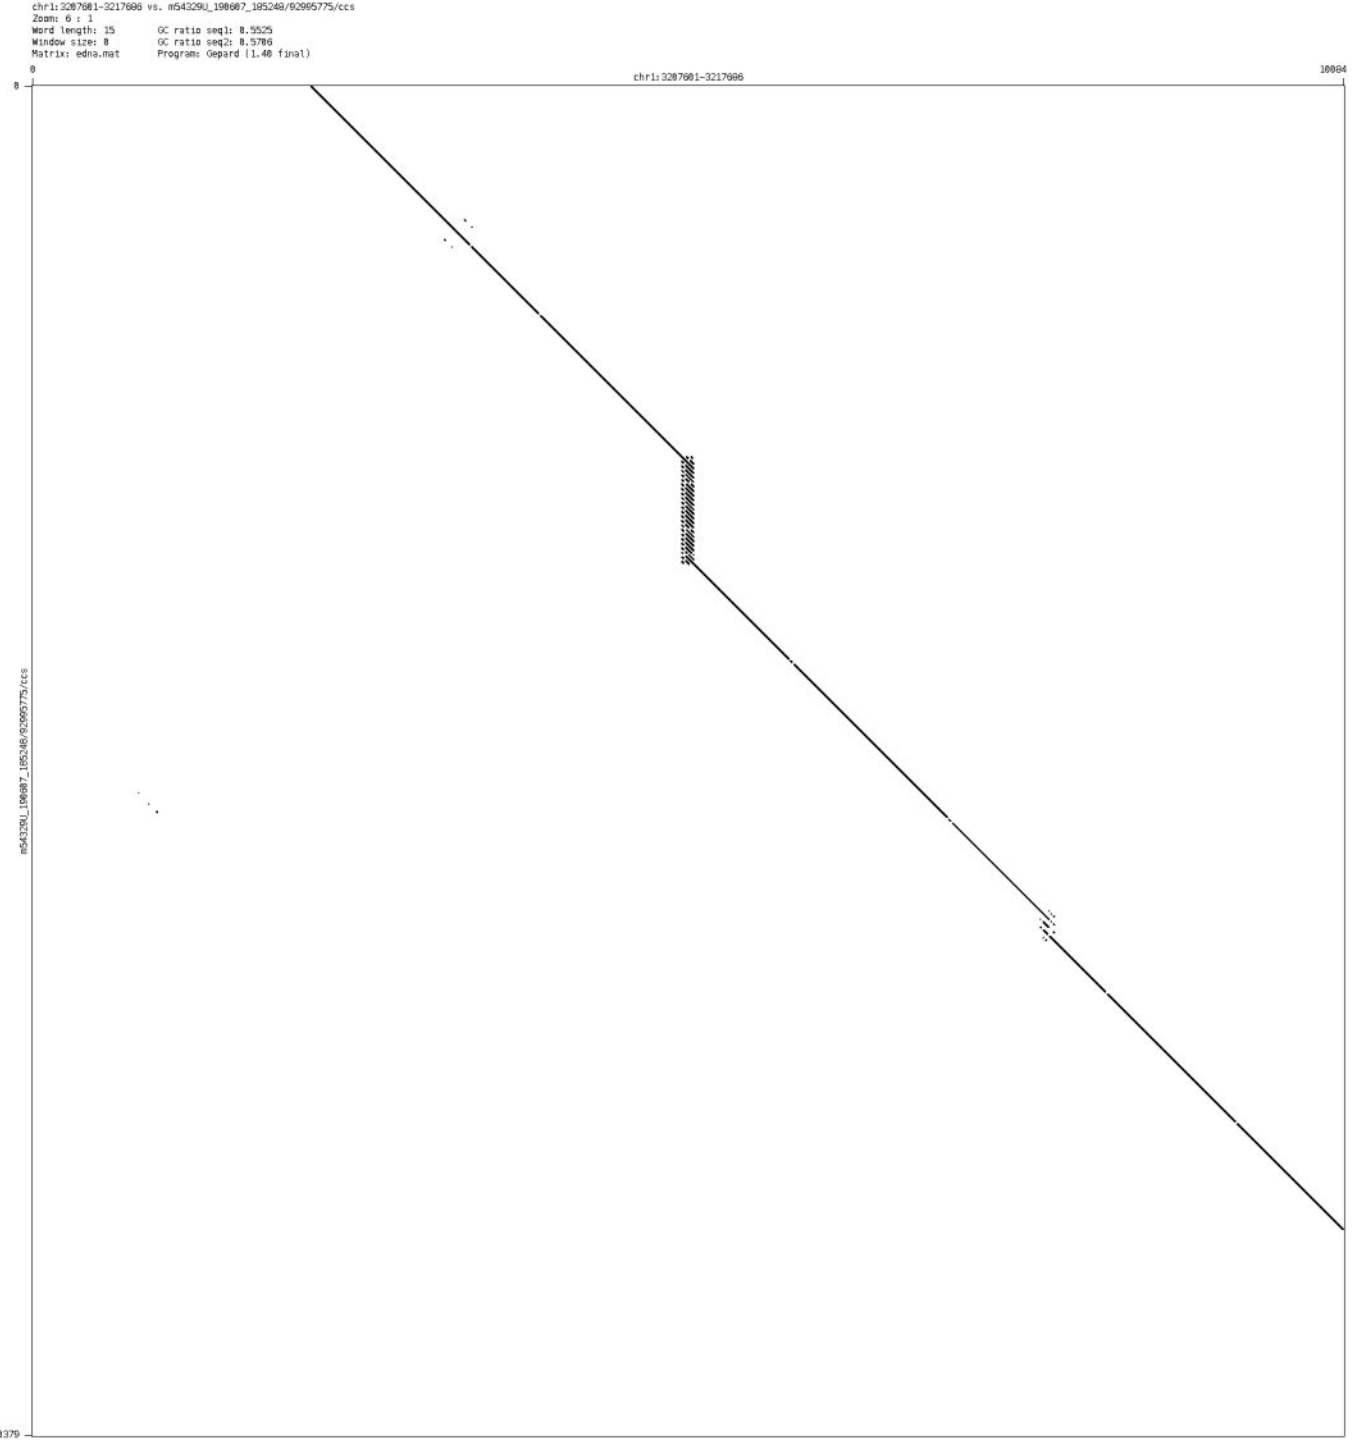

➤ chr1\_4144504\_4144634

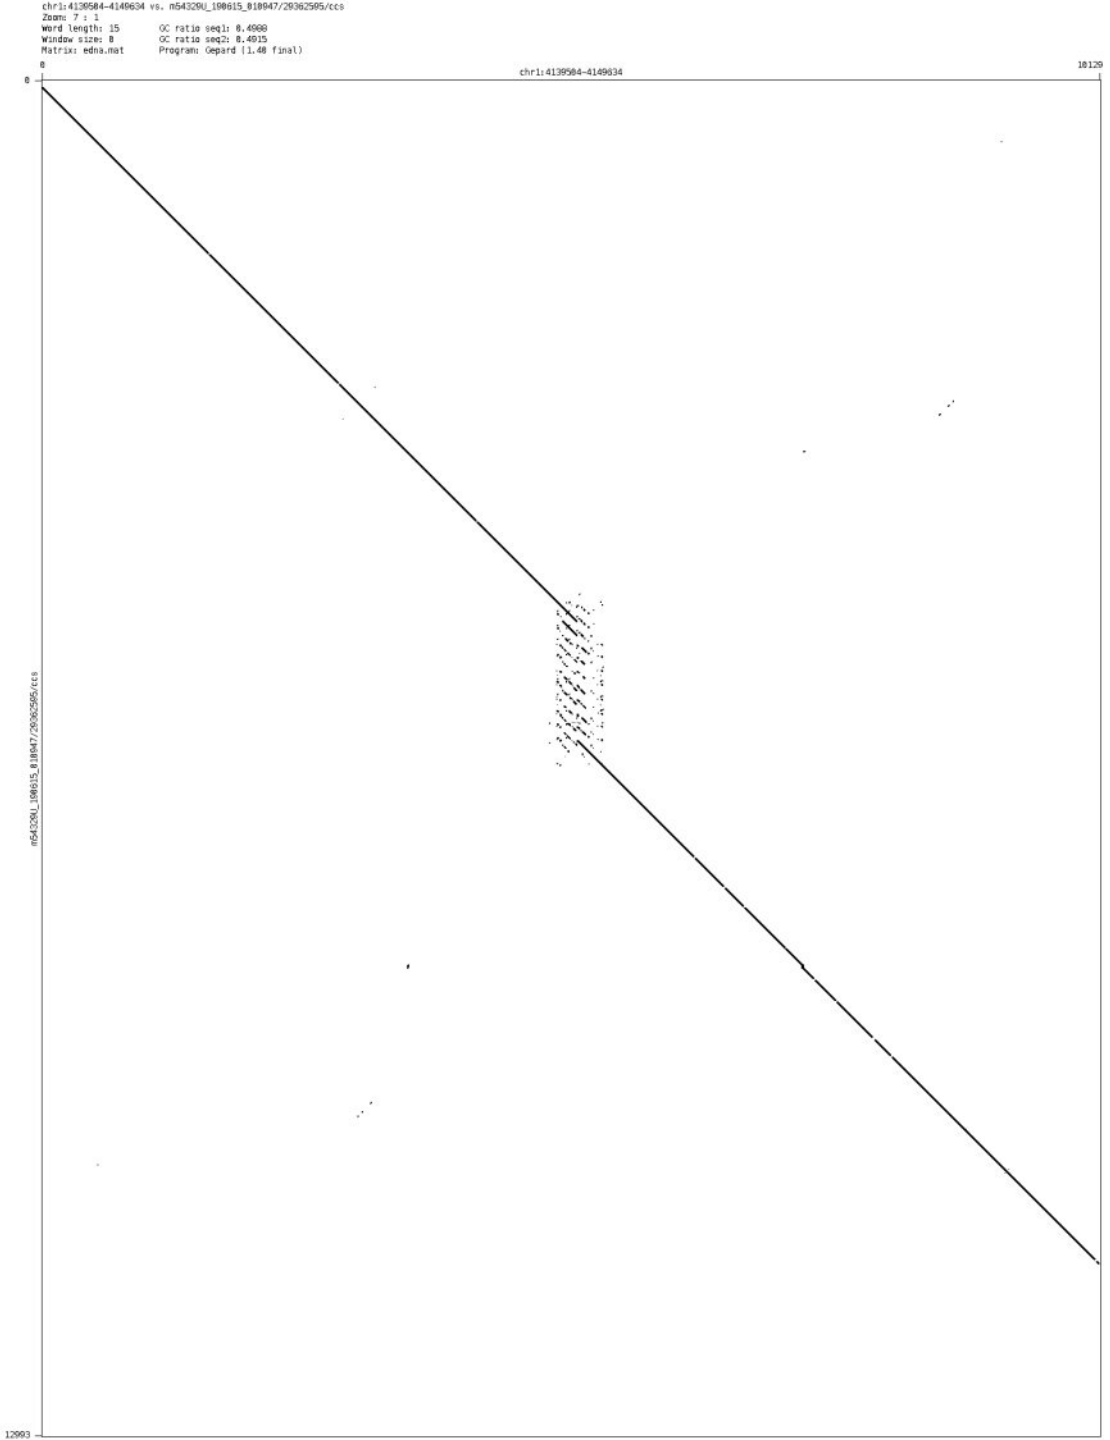

➤ chr1\_5160213\_5160312

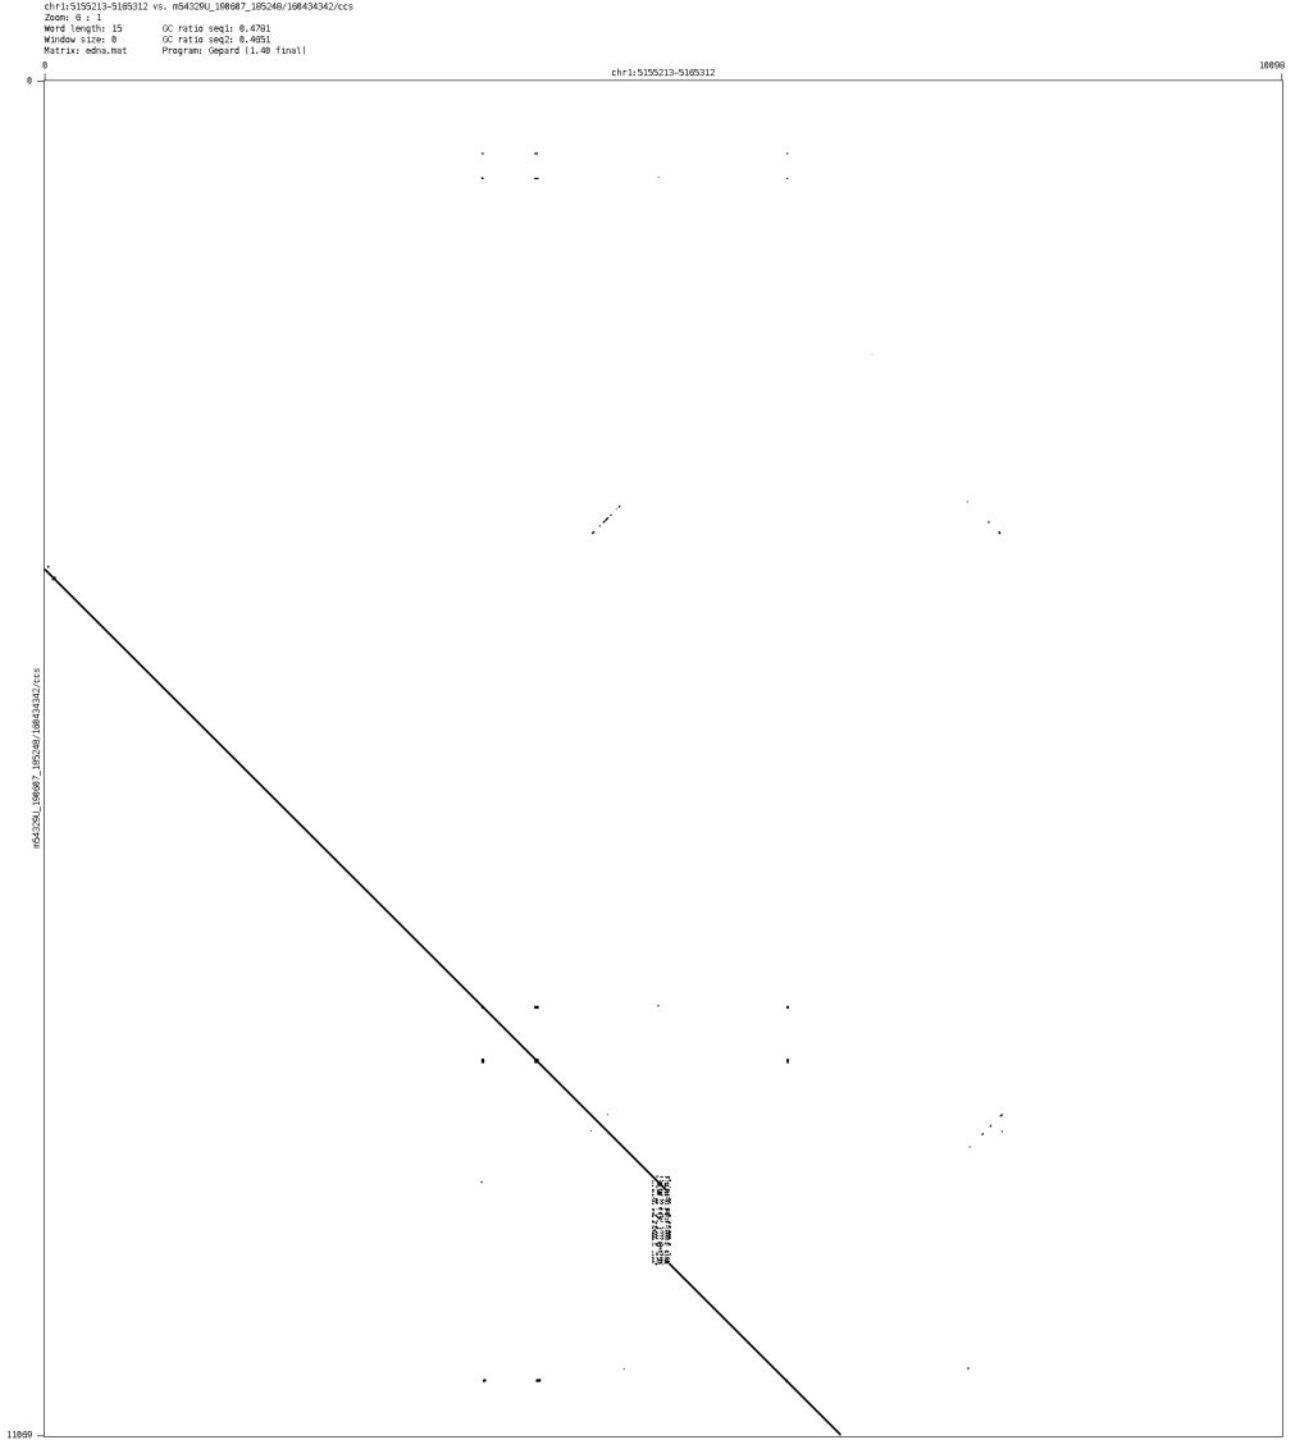

➤ chr1\_9411149\_9411257

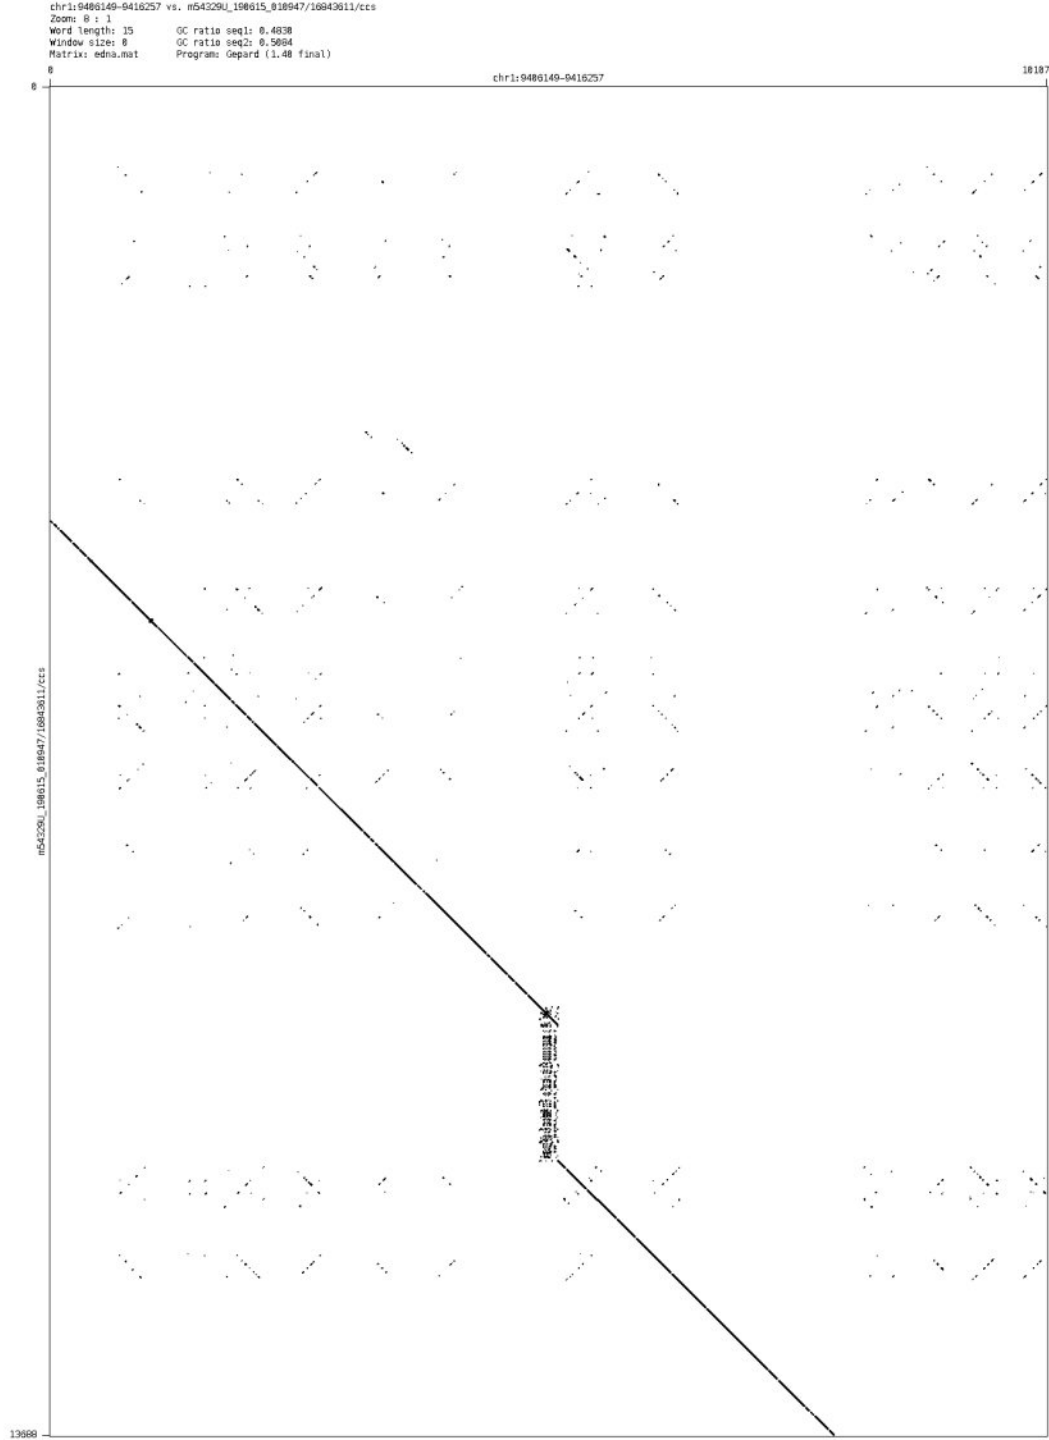

➤ chr1\_14109802\_14112516

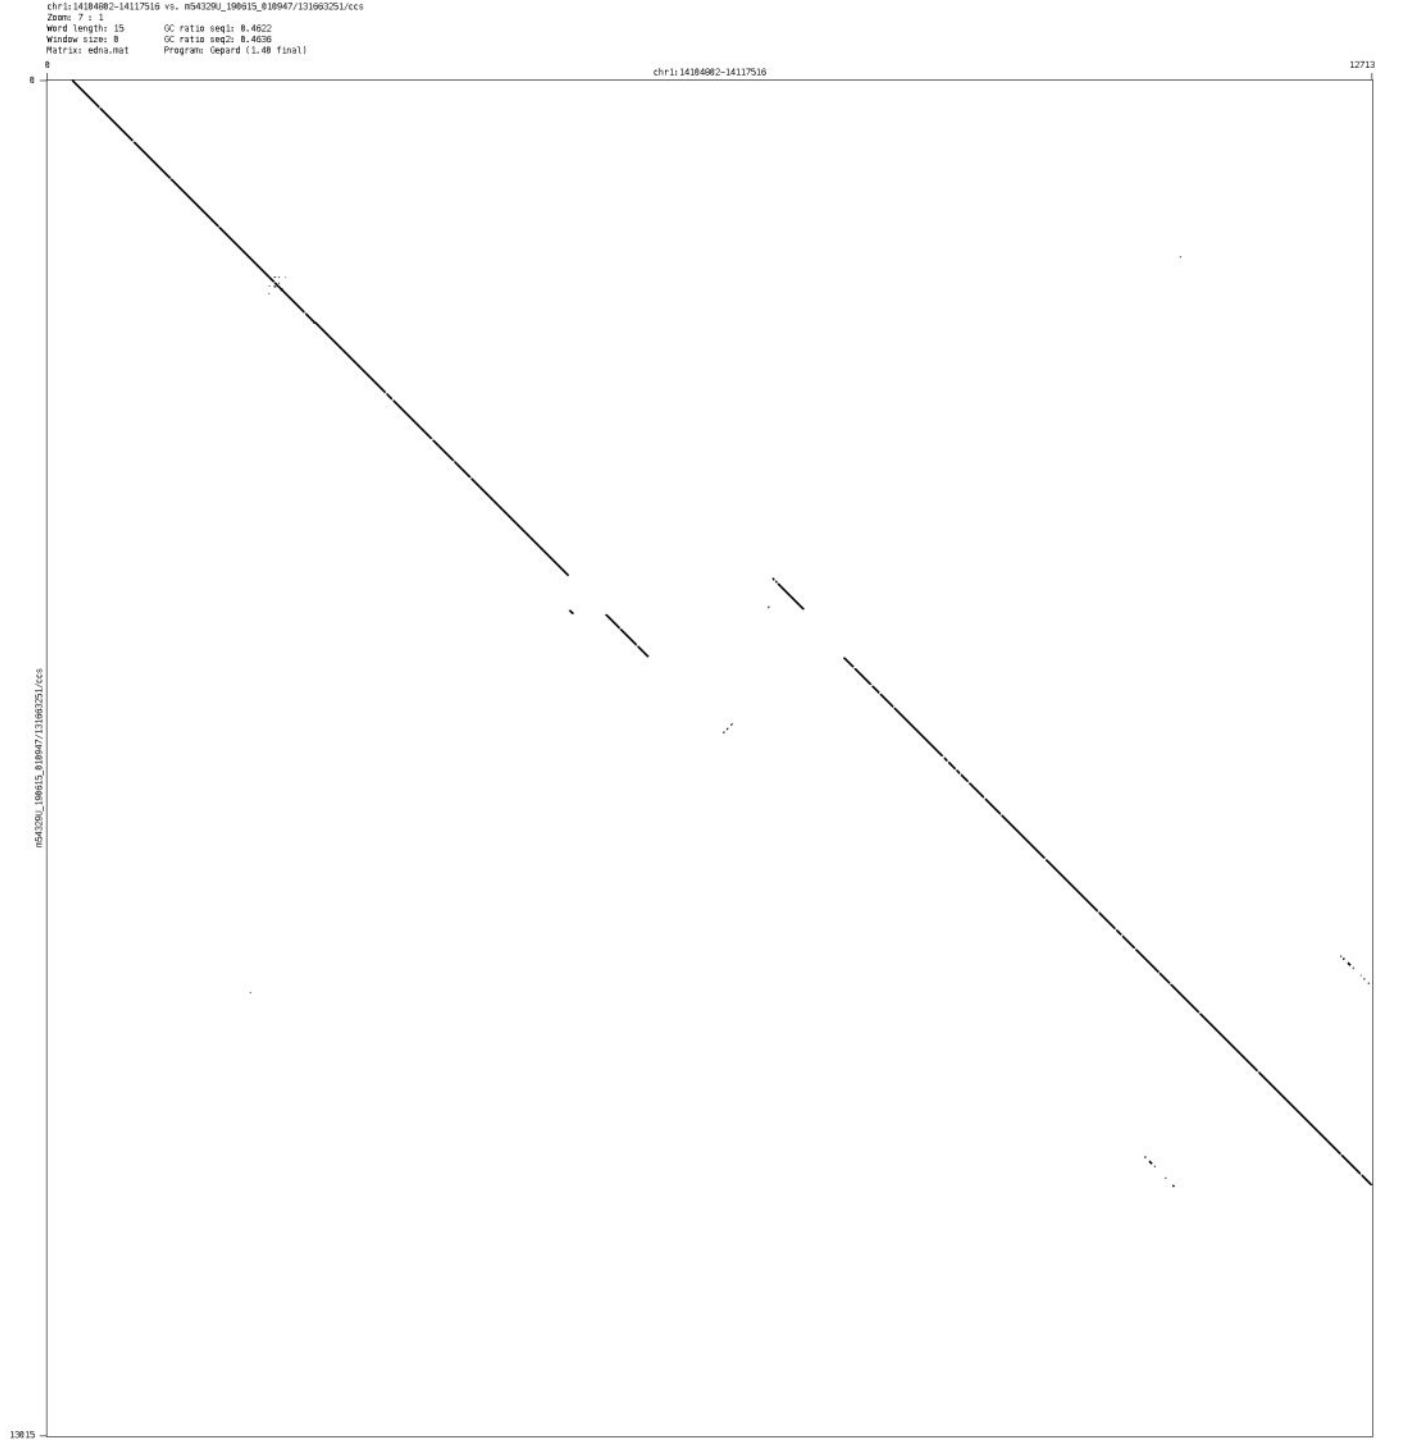

➤ chr1\_16050024\_16059805

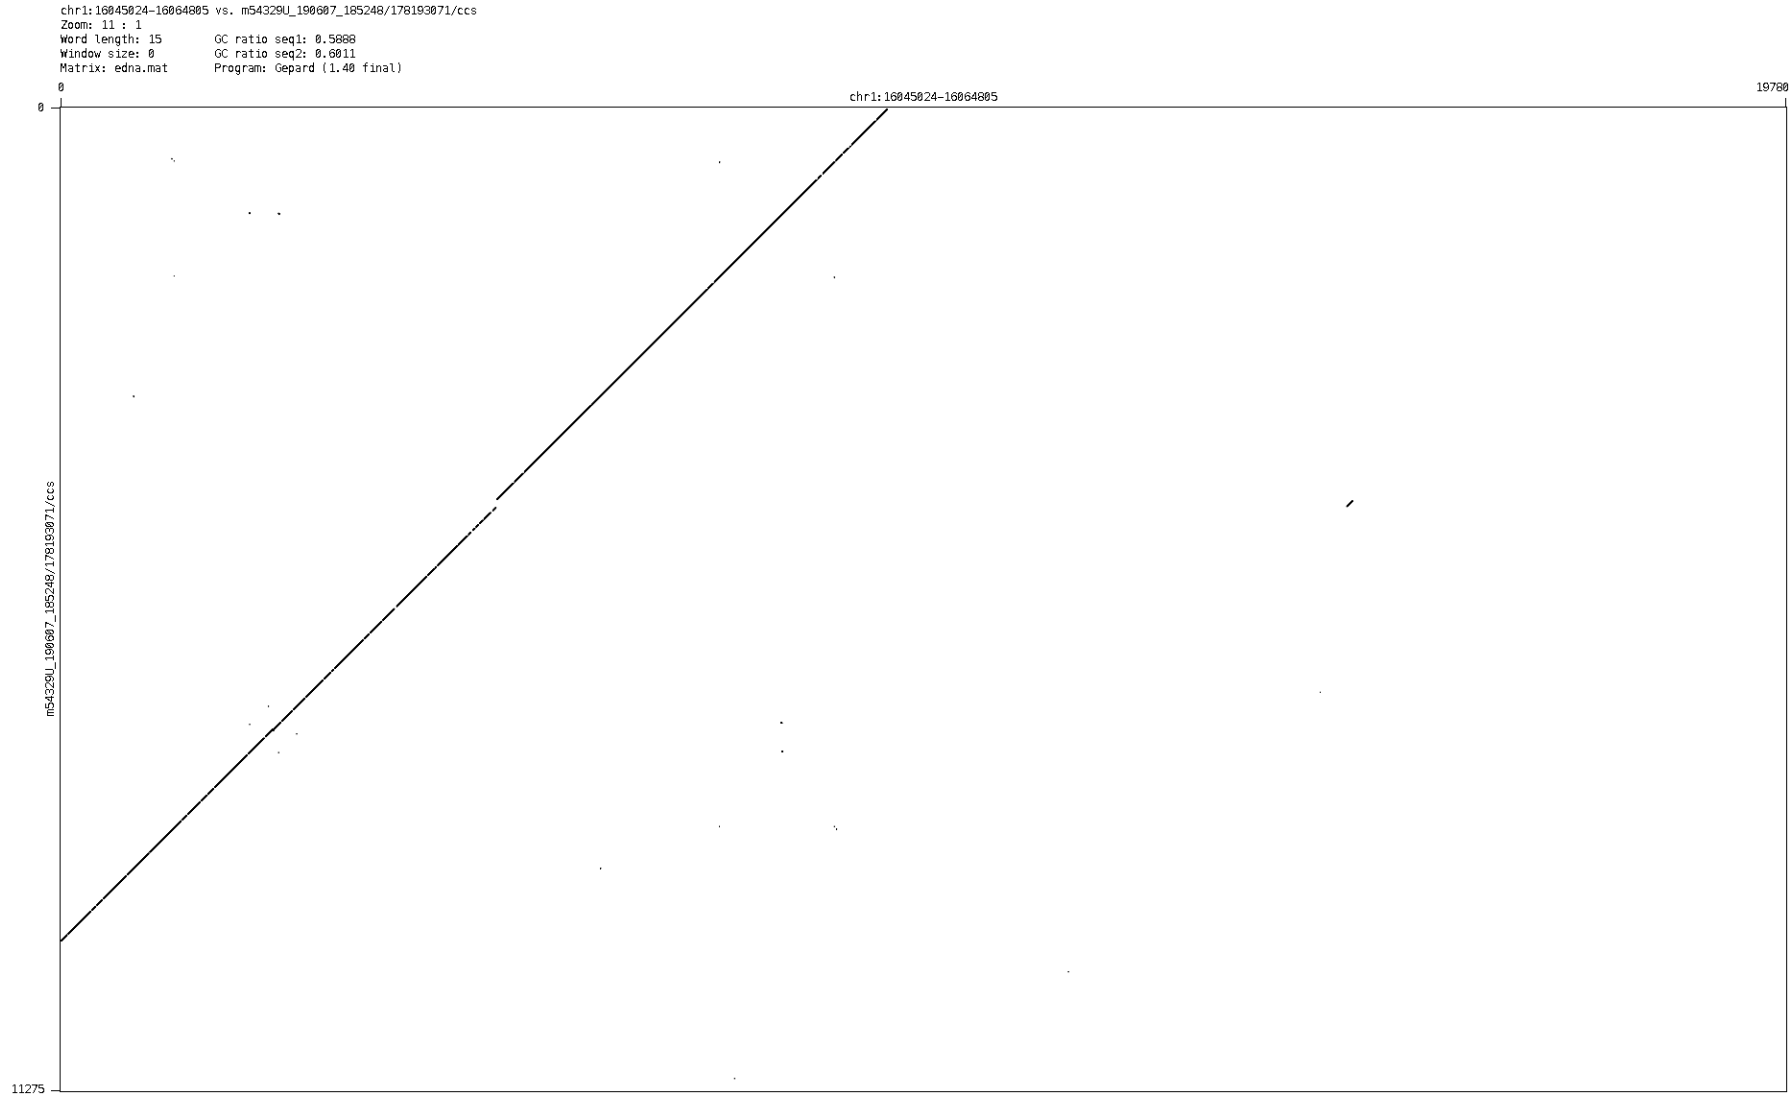

➤ chr1\_18049823\_18049961

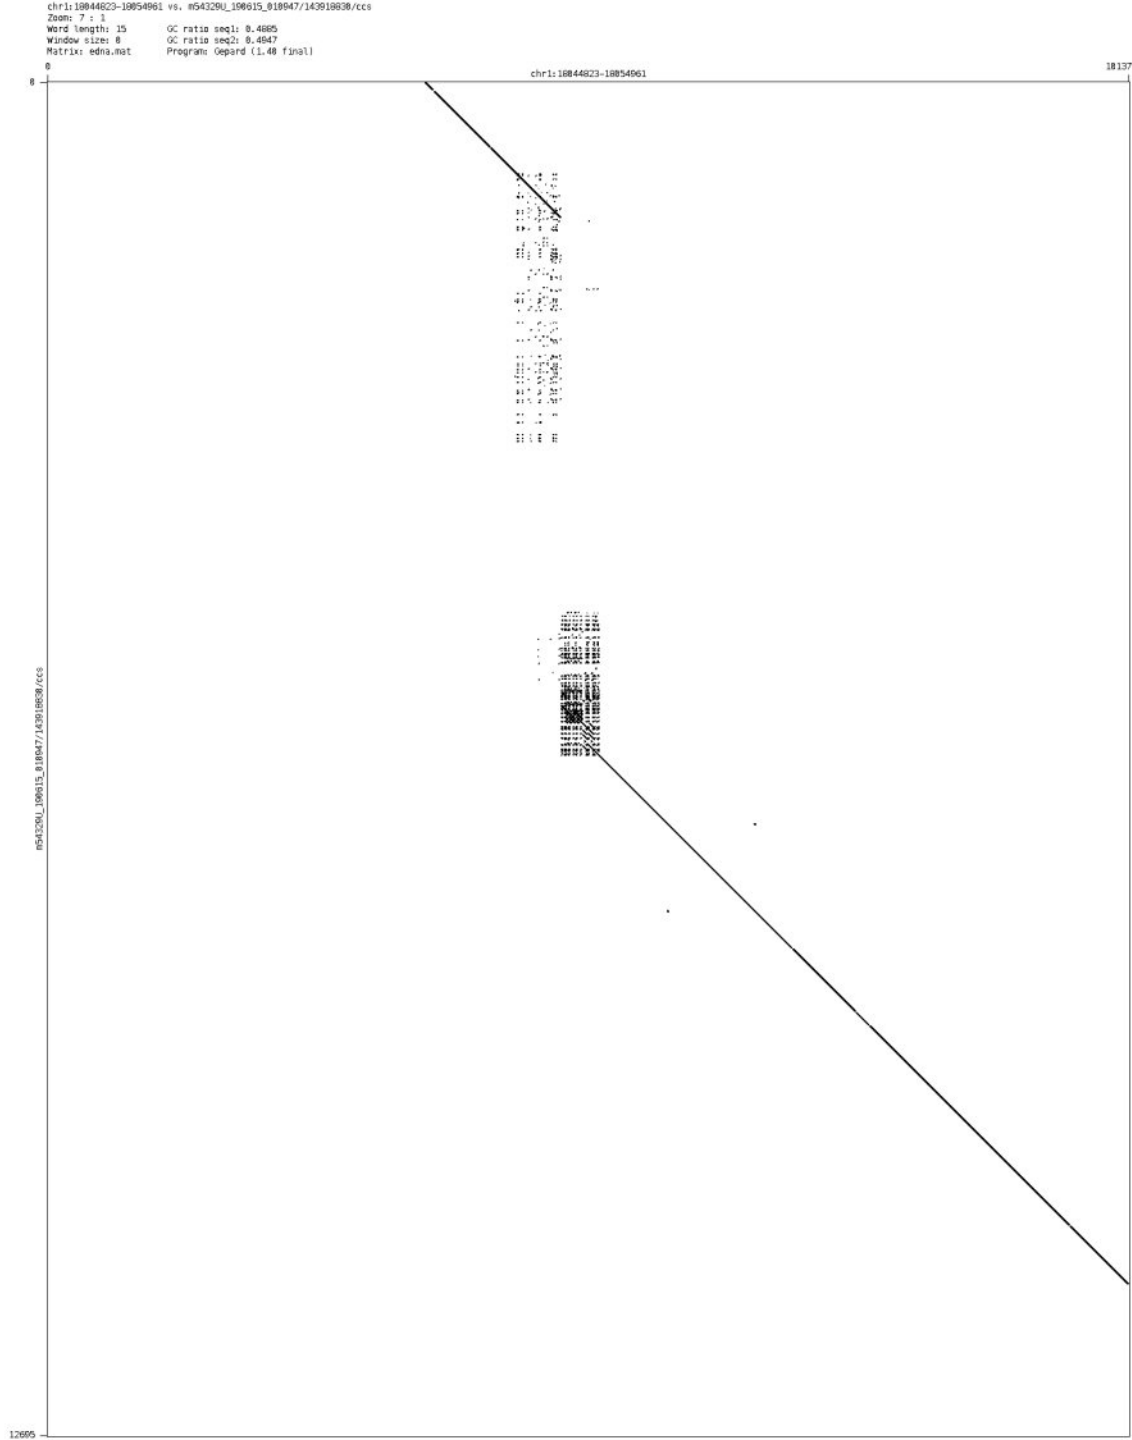



➤ chr1\_18925882\_18926000

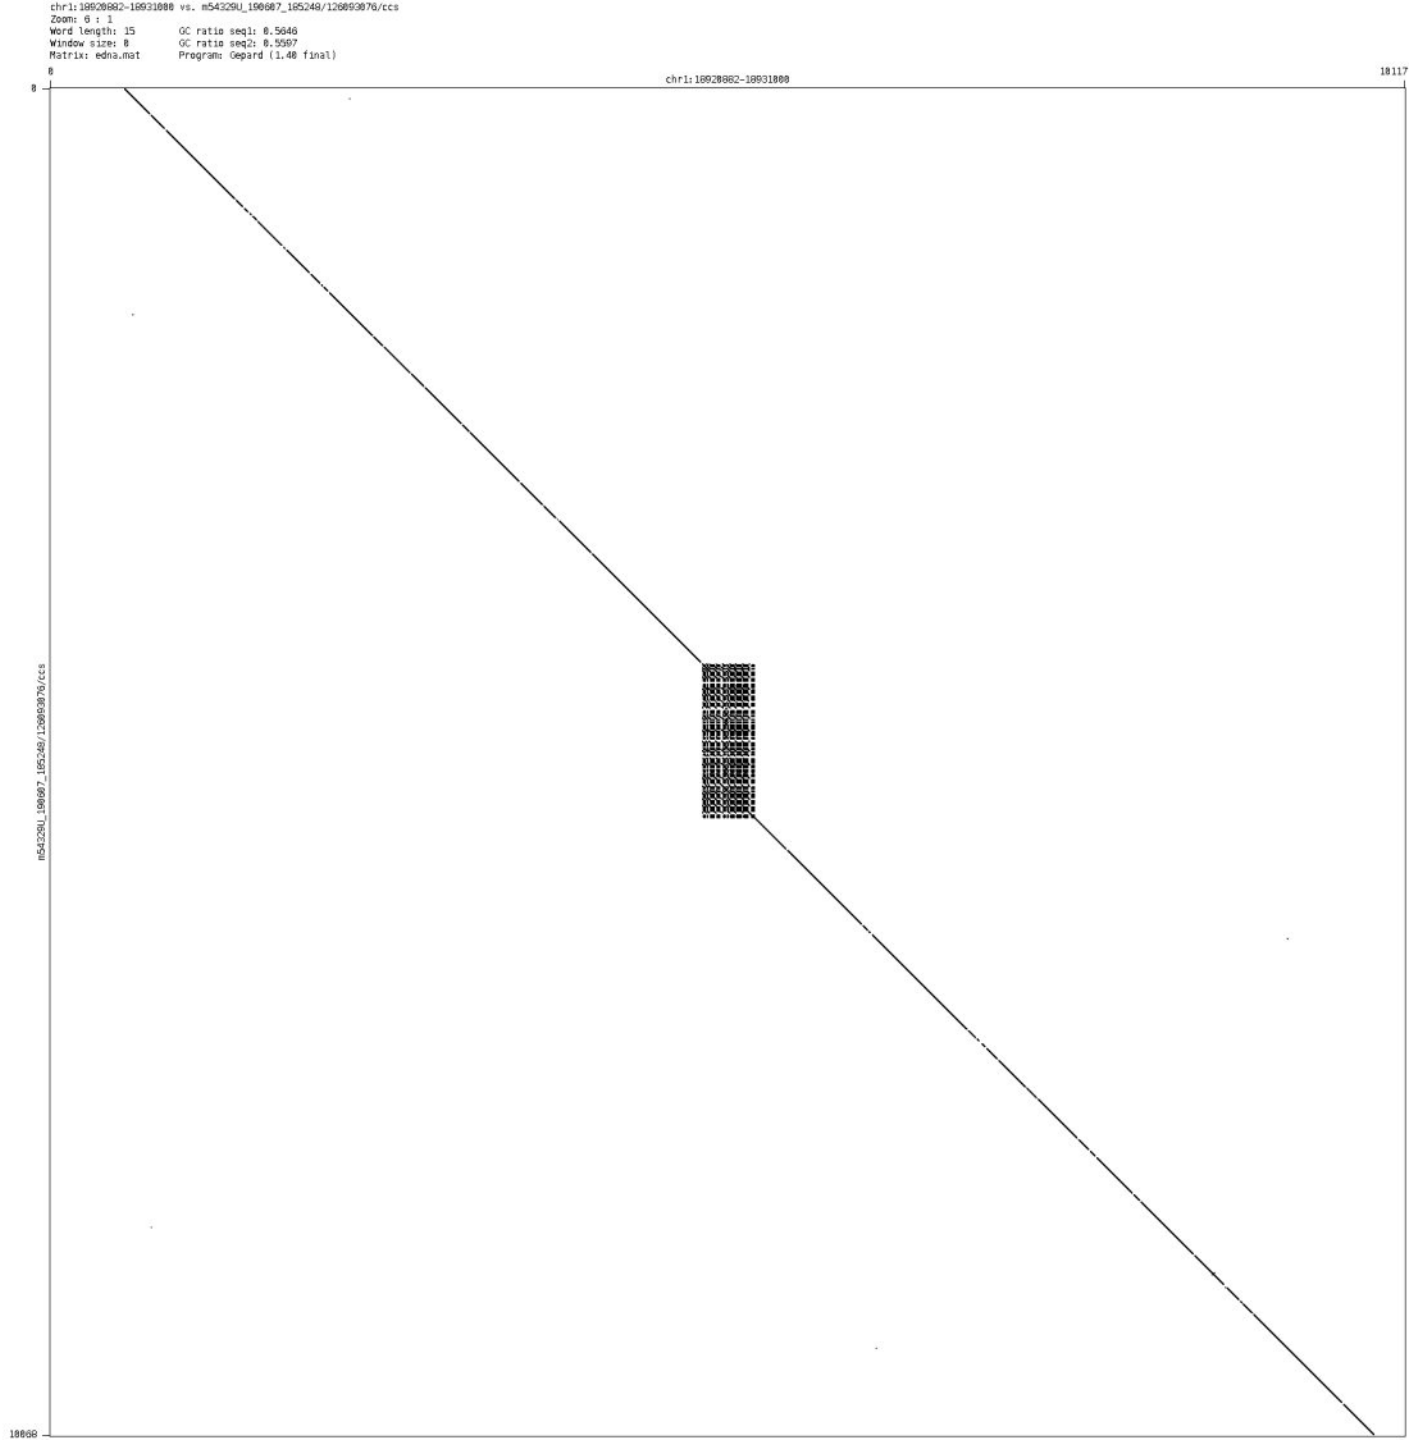

➤ chr1\_23392547\_23392627

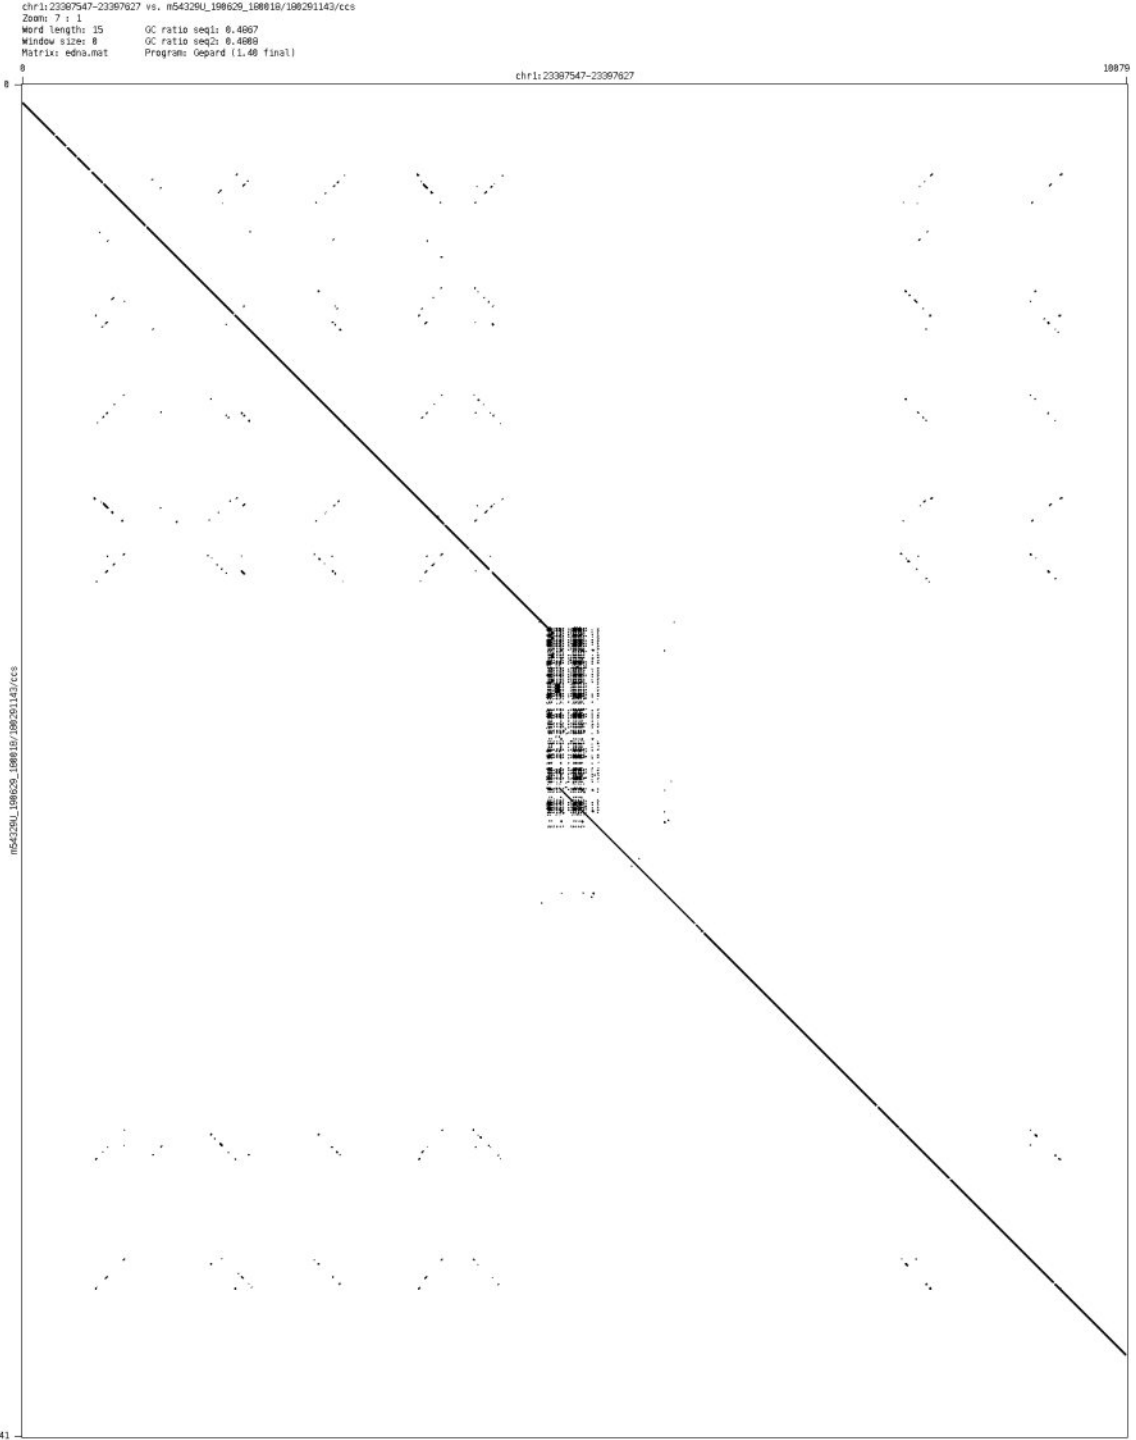

➤ chr1\_29771334\_29771549

chr1:29786334-29776549 vs. m54326U\_196887\_185248/82575874/ccs  
Zoom: 7 : 1  
Word length: 15 GC ratio seq1: 8.2658  
Window size: 8 GC ratio seq2: 8.3282  
Matrix: edna.mat Program: Gepard (1.48 final)

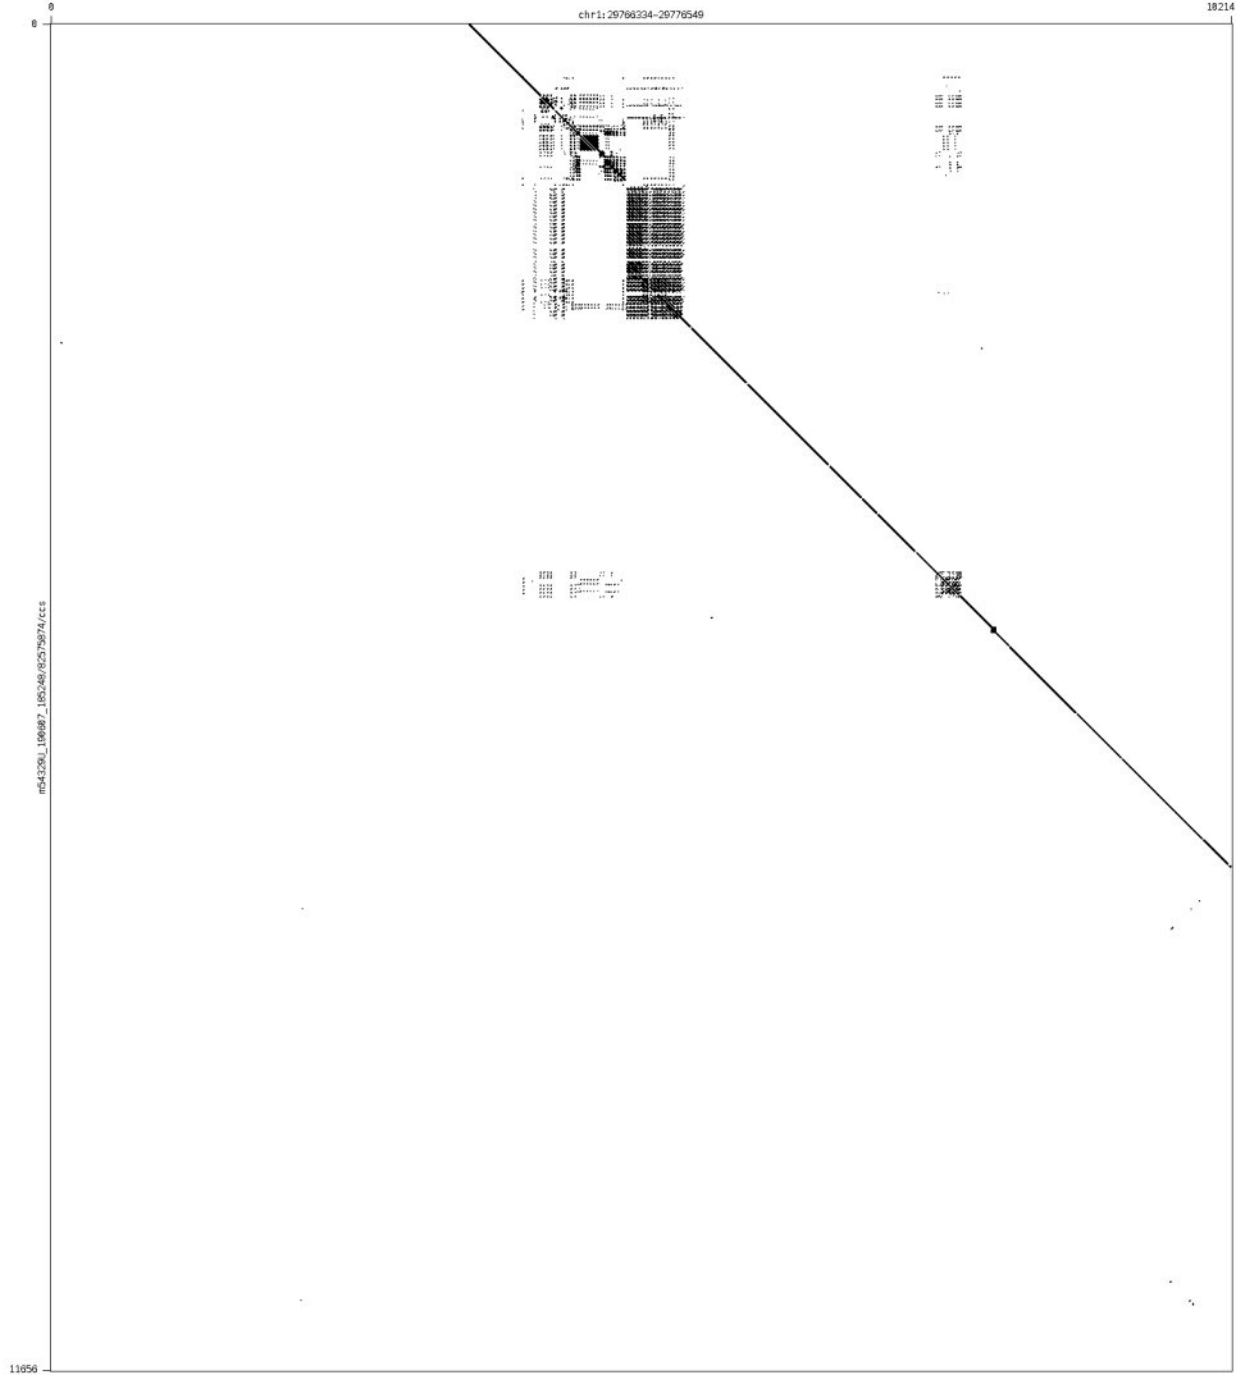

➤ chr1\_31431806\_31431981

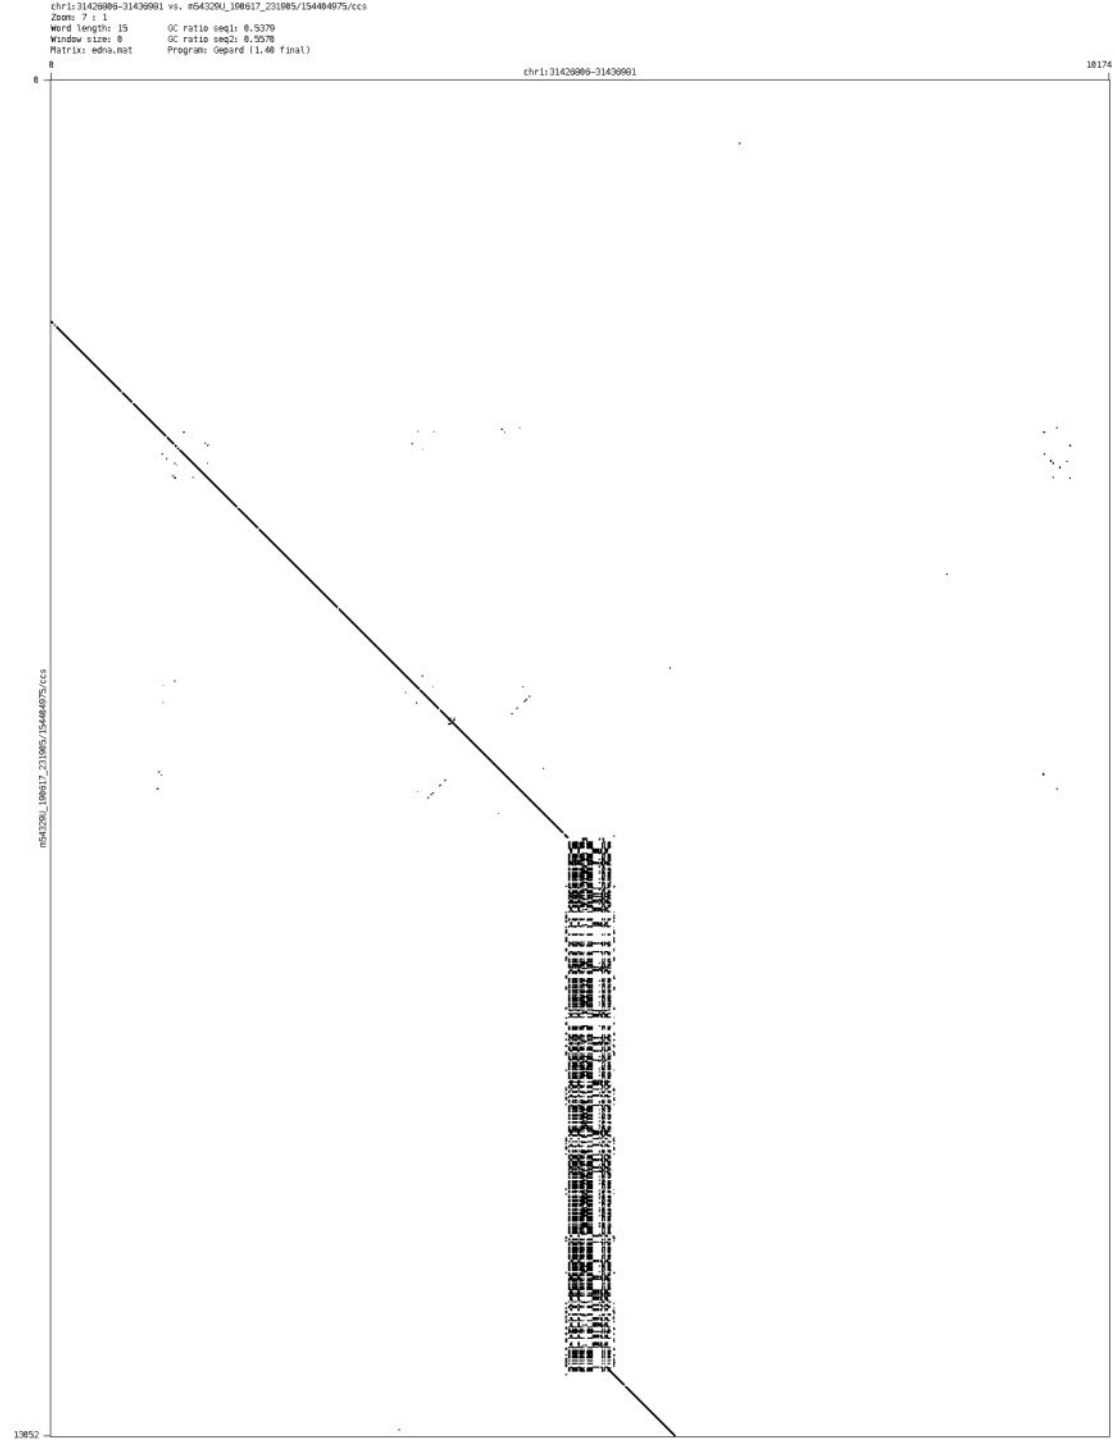

➤ chr1\_36267369\_36269040

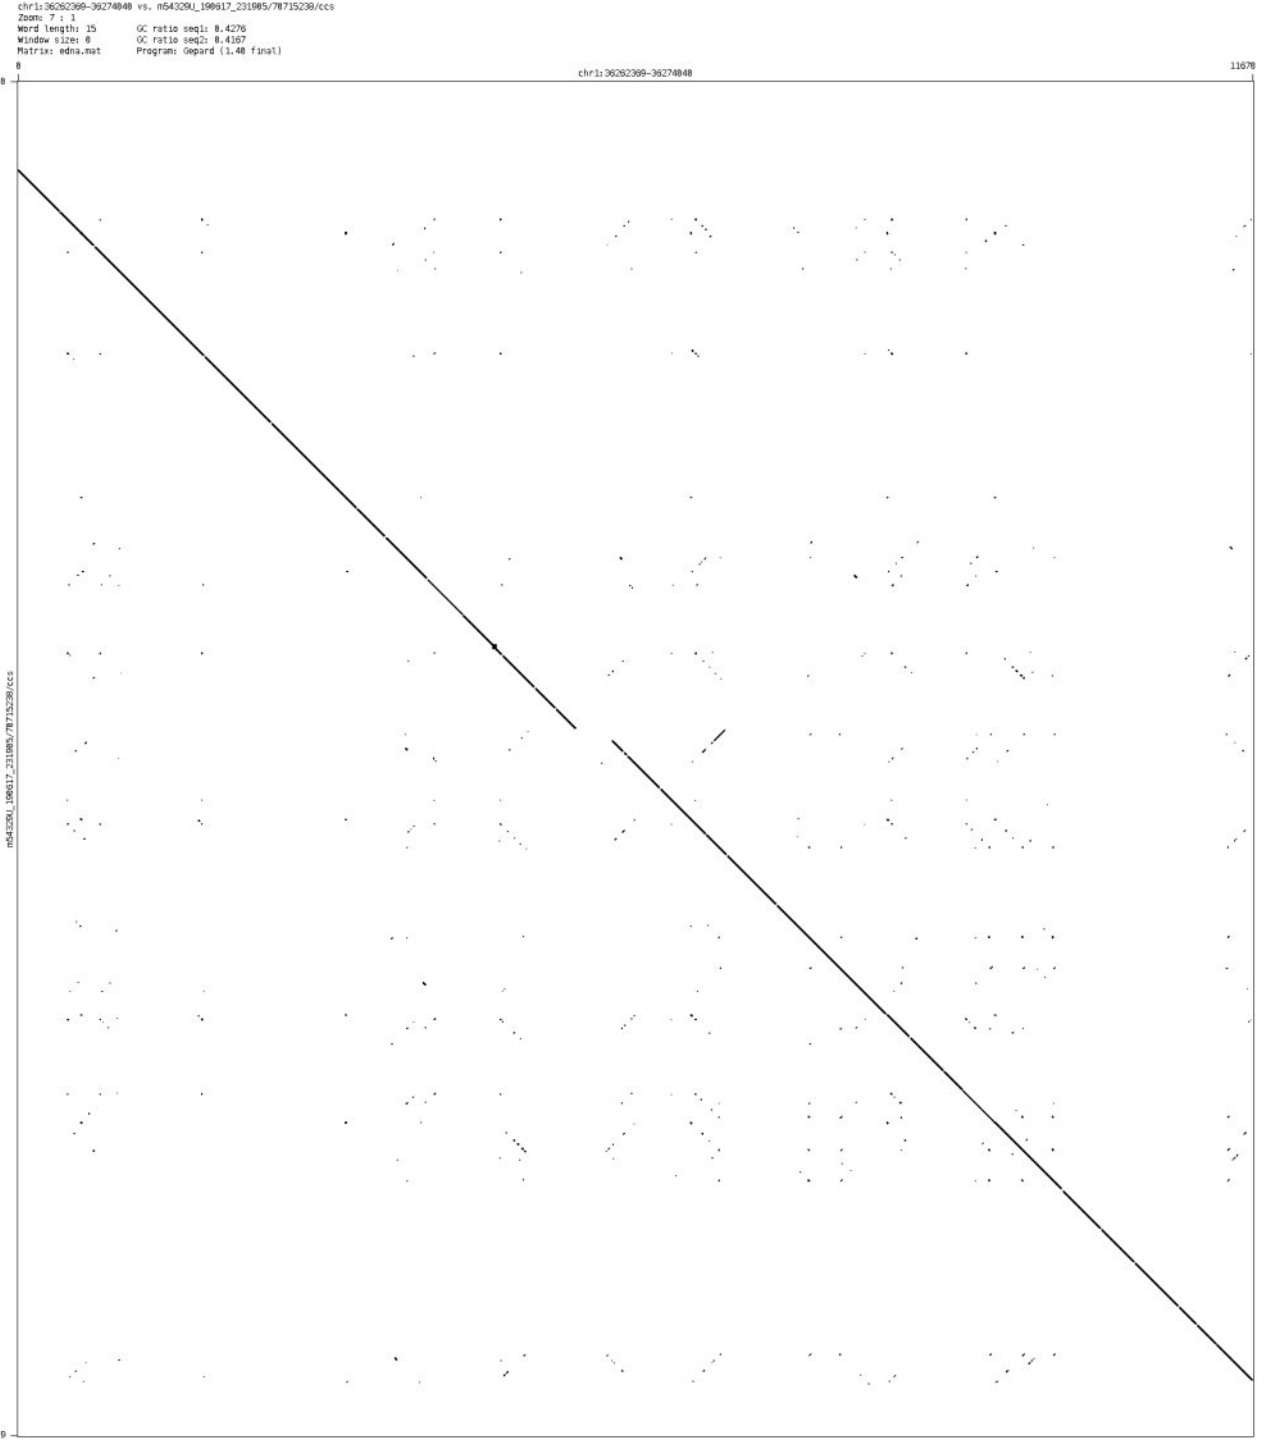

➤ chr1\_43593650\_43594474

chr1:43590959-43594474 vs. n543291\_188626\_188018/953838/ccc  
Zoom: 7 : 1 GC ratio seq1: 0.5626  
Word length: 15 GC ratio seq2: 0.5714  
Window size: 0 Program: oepard (1.40 final)  
Matrix: edna.mat

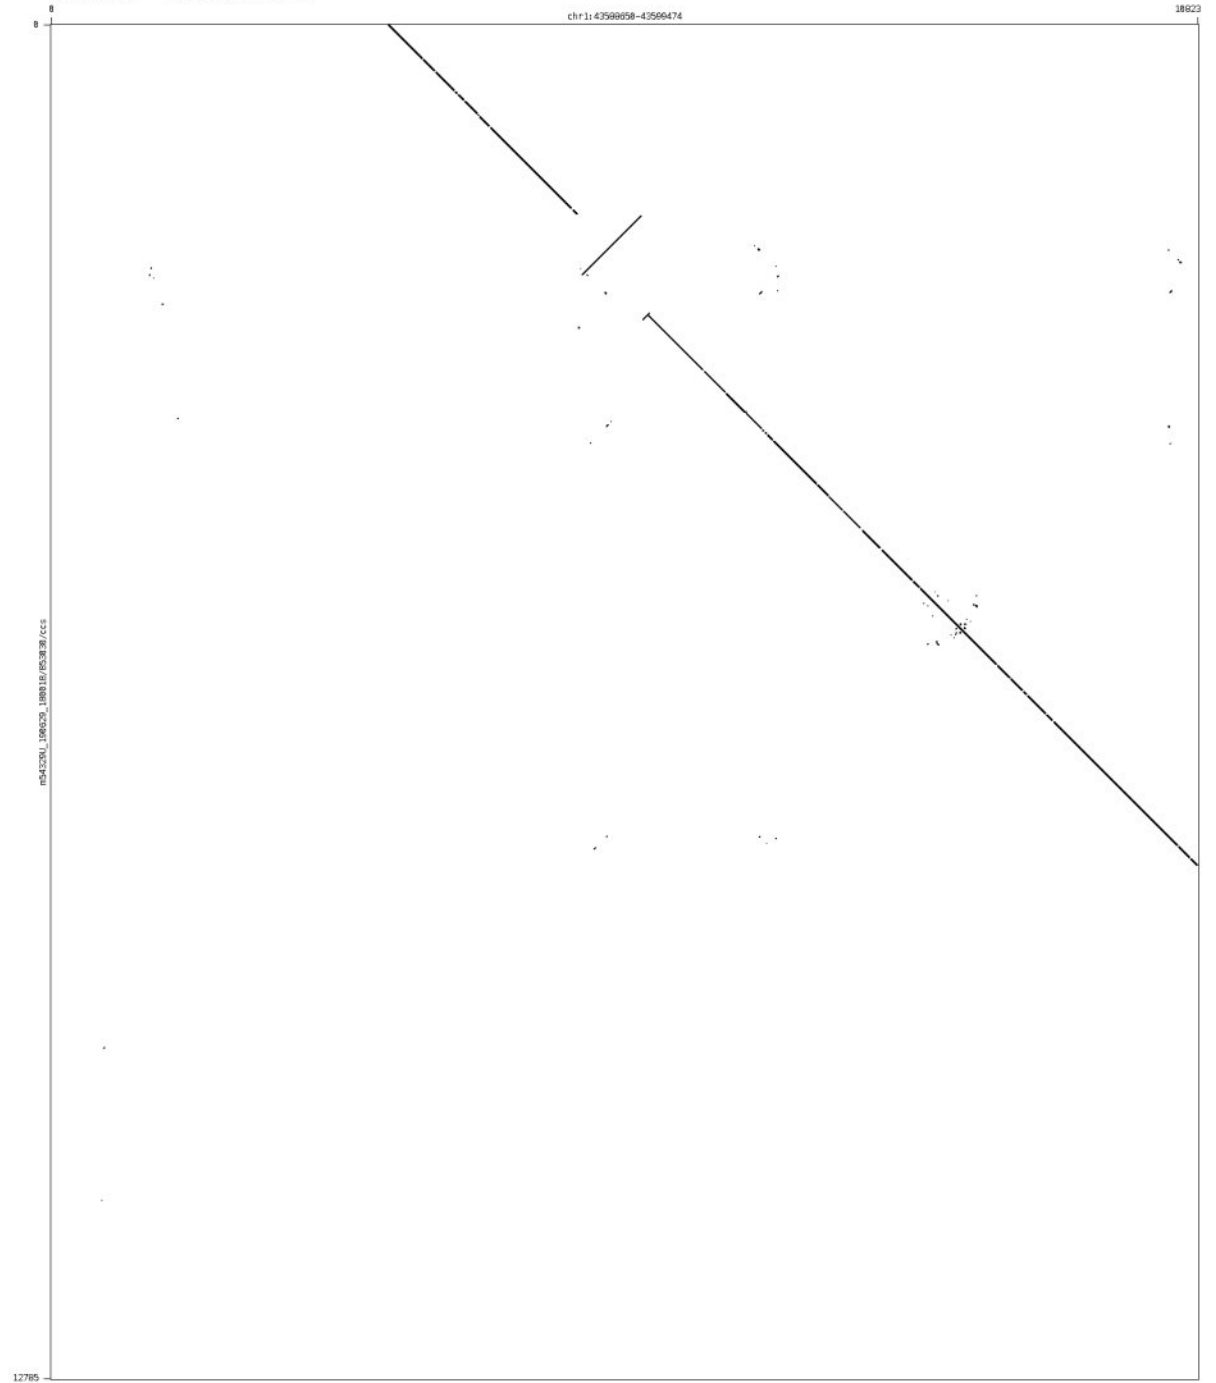

12785

➤ chr1\_81194398\_81195874

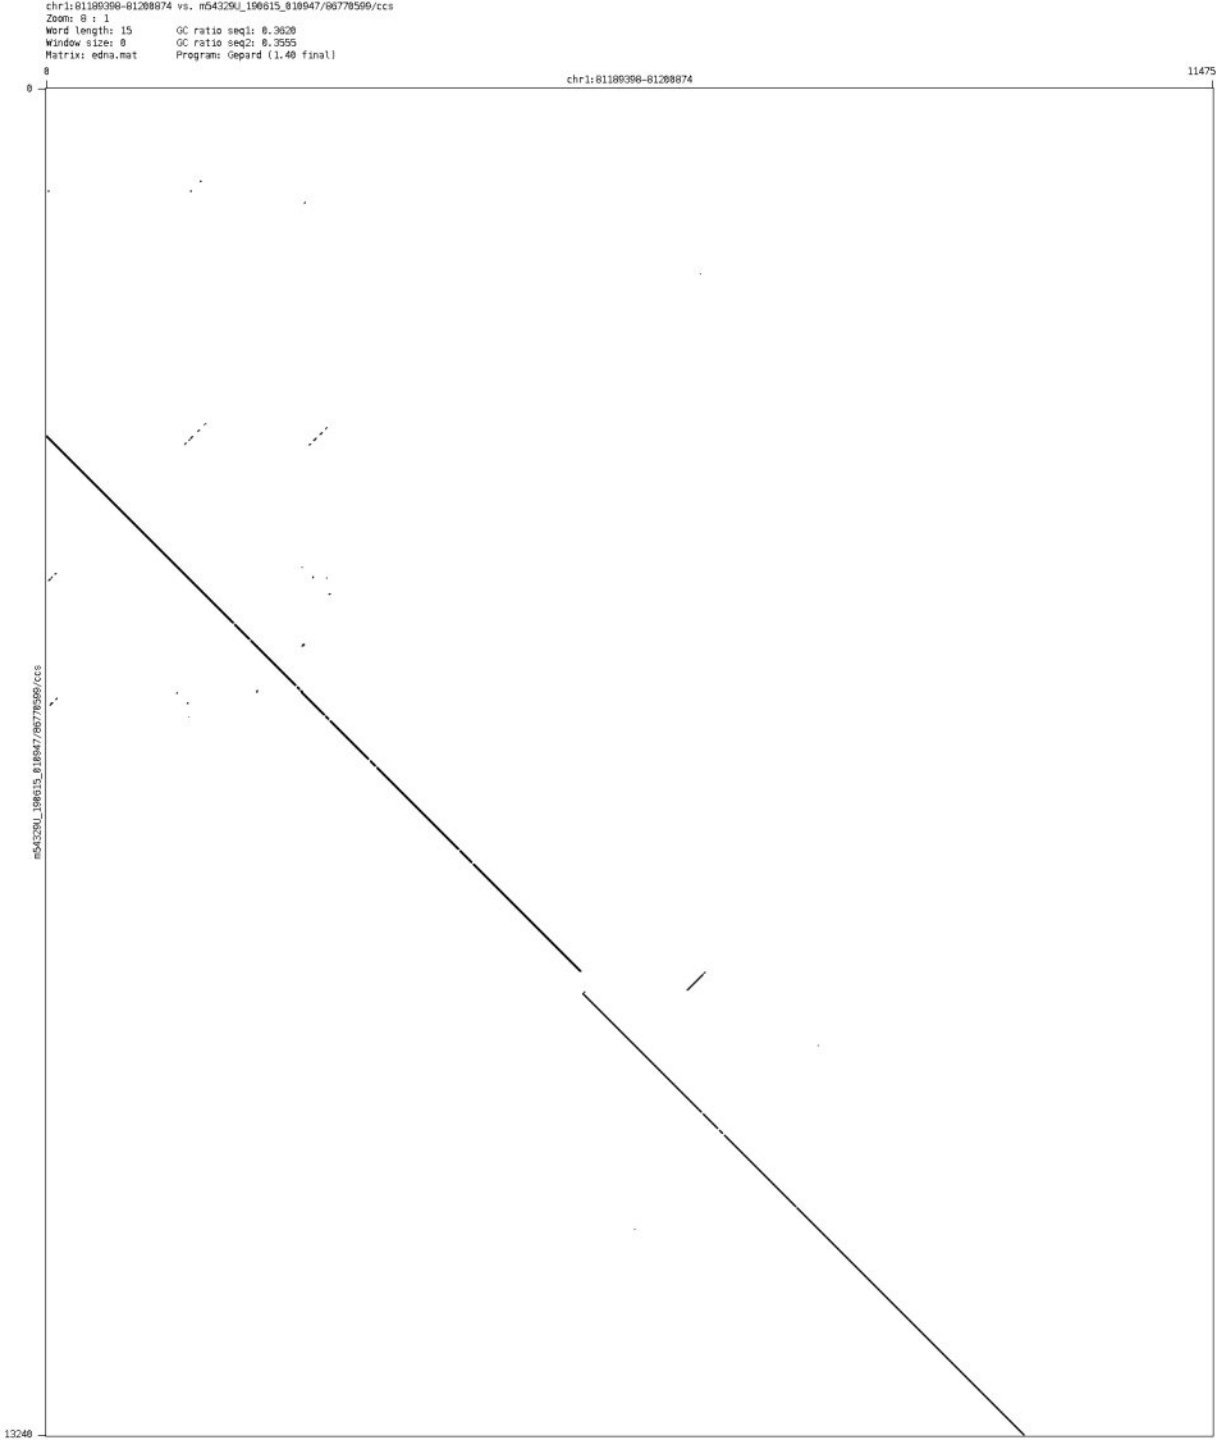

➤ chr1\_118318808\_118318888

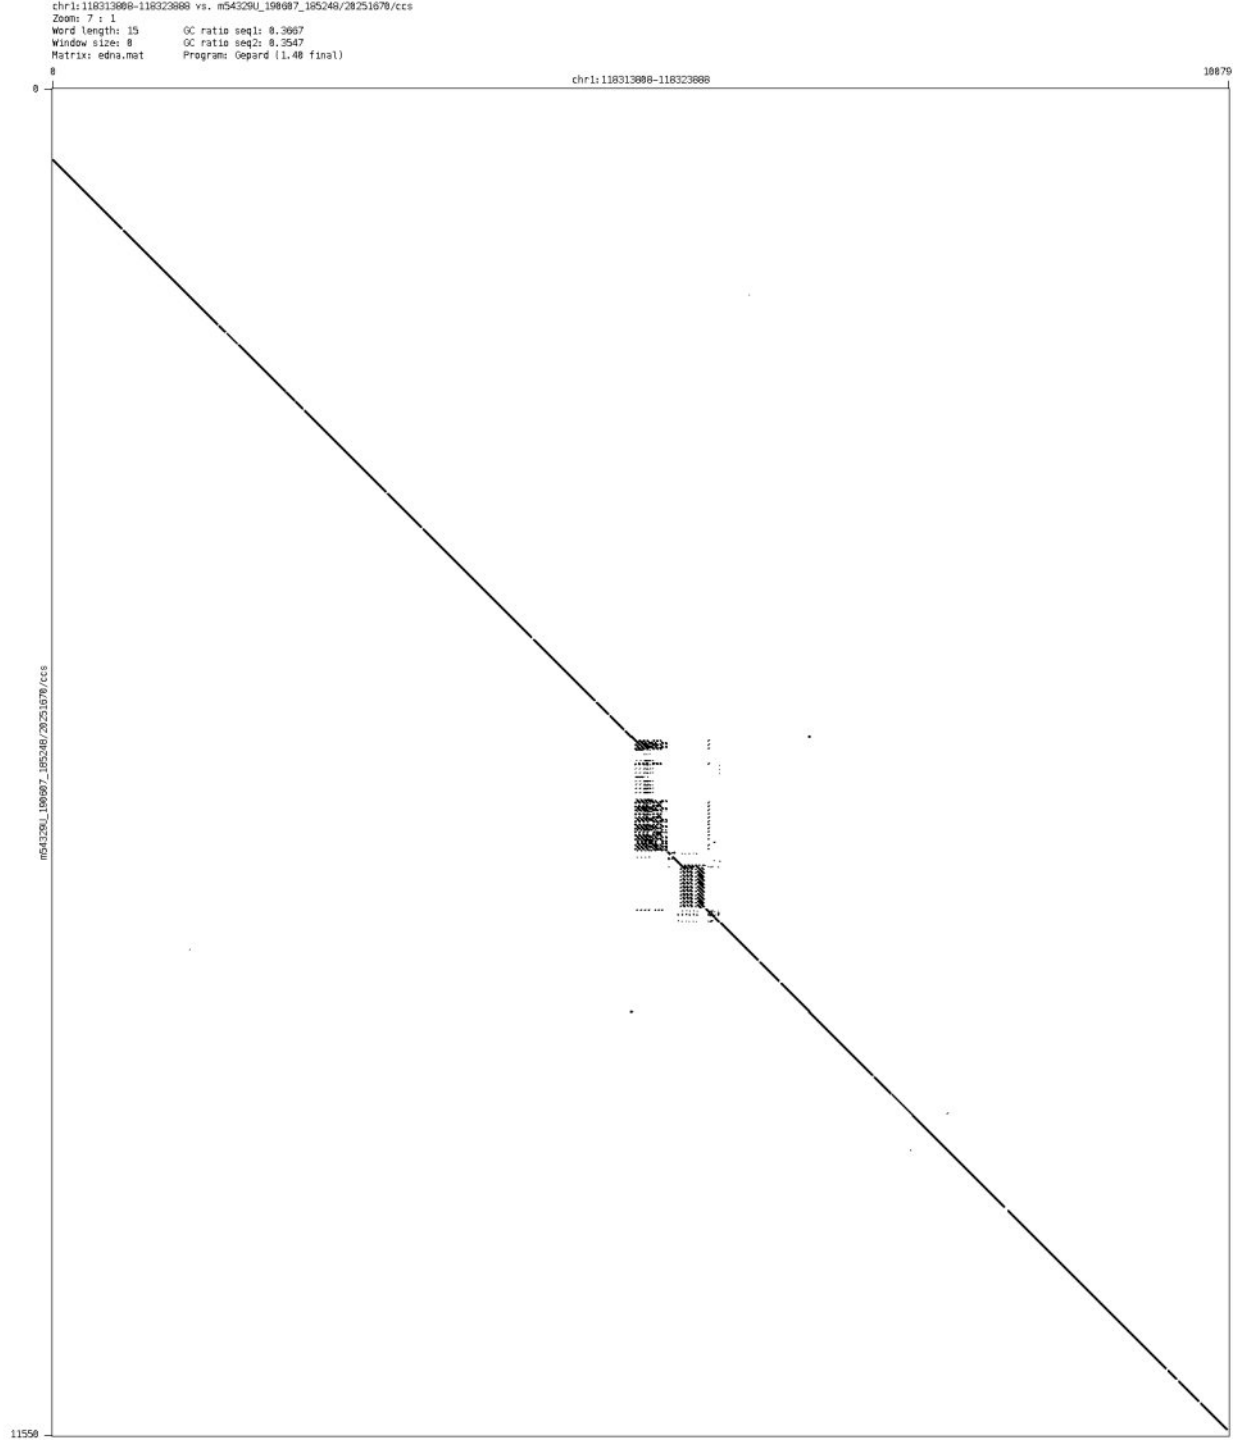



➤ chr1\_144102505\_144106880

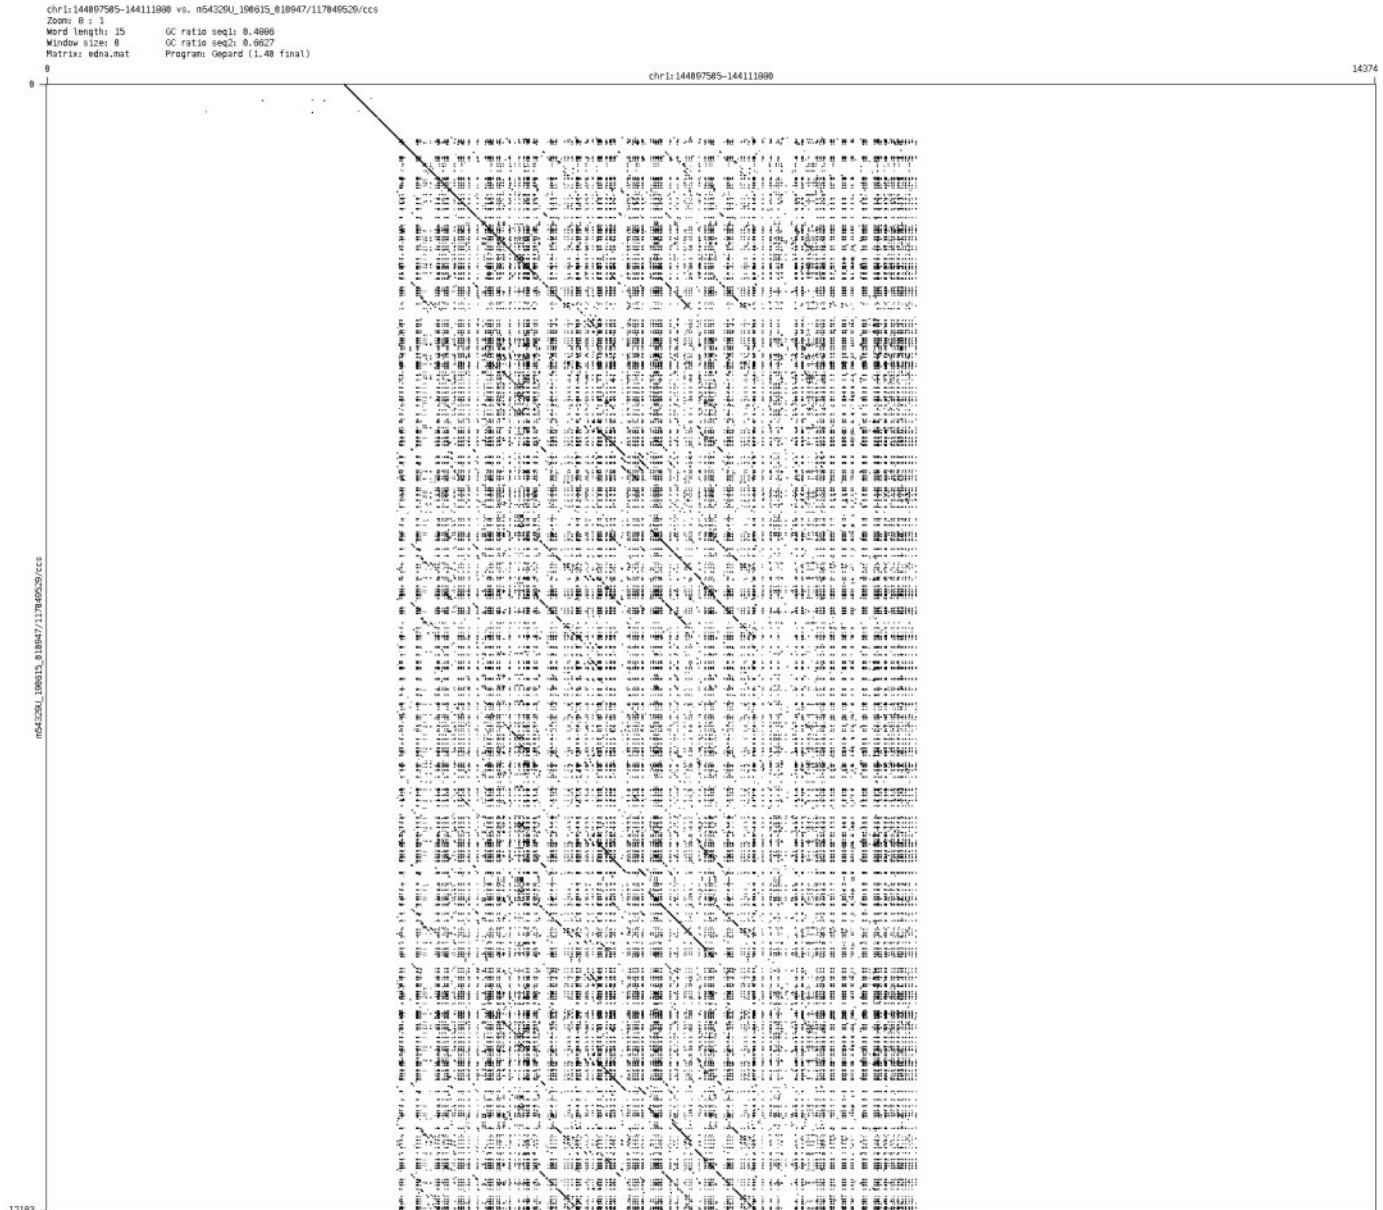

➤ chr1\_154714108\_154714439

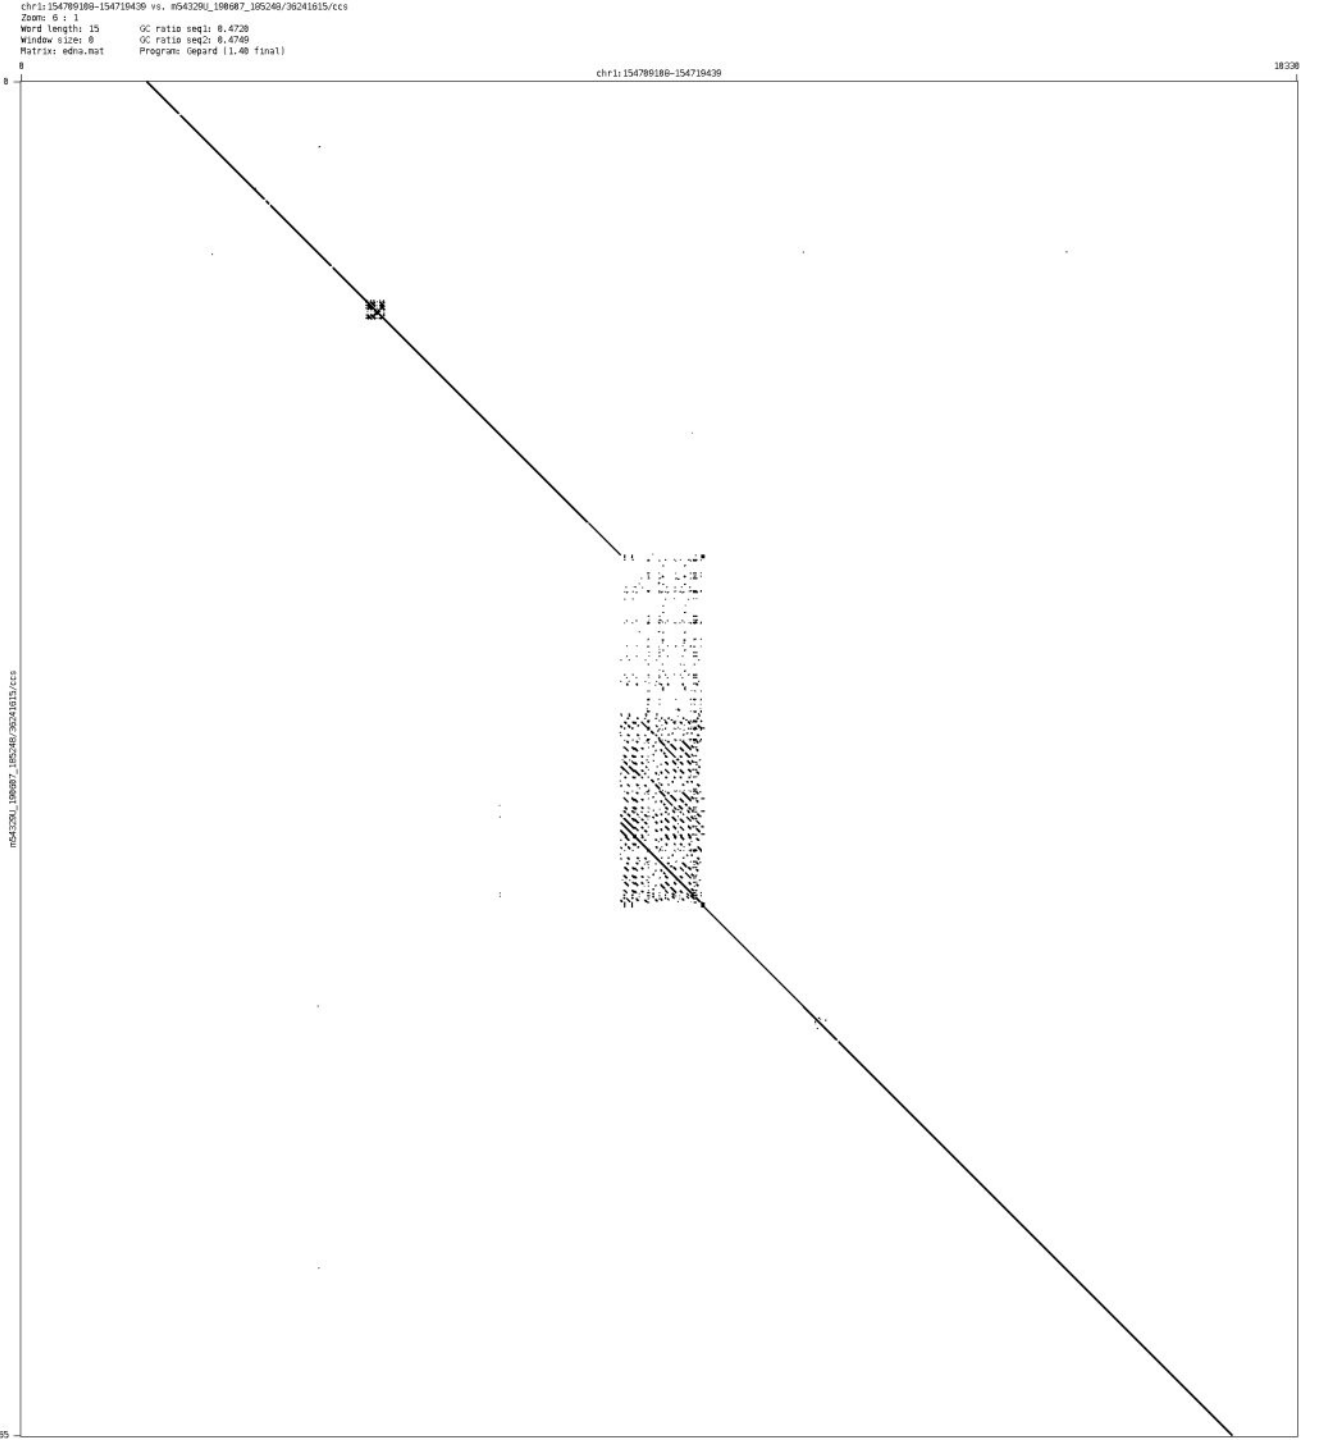

➤ chr1\_167056632\_167056747

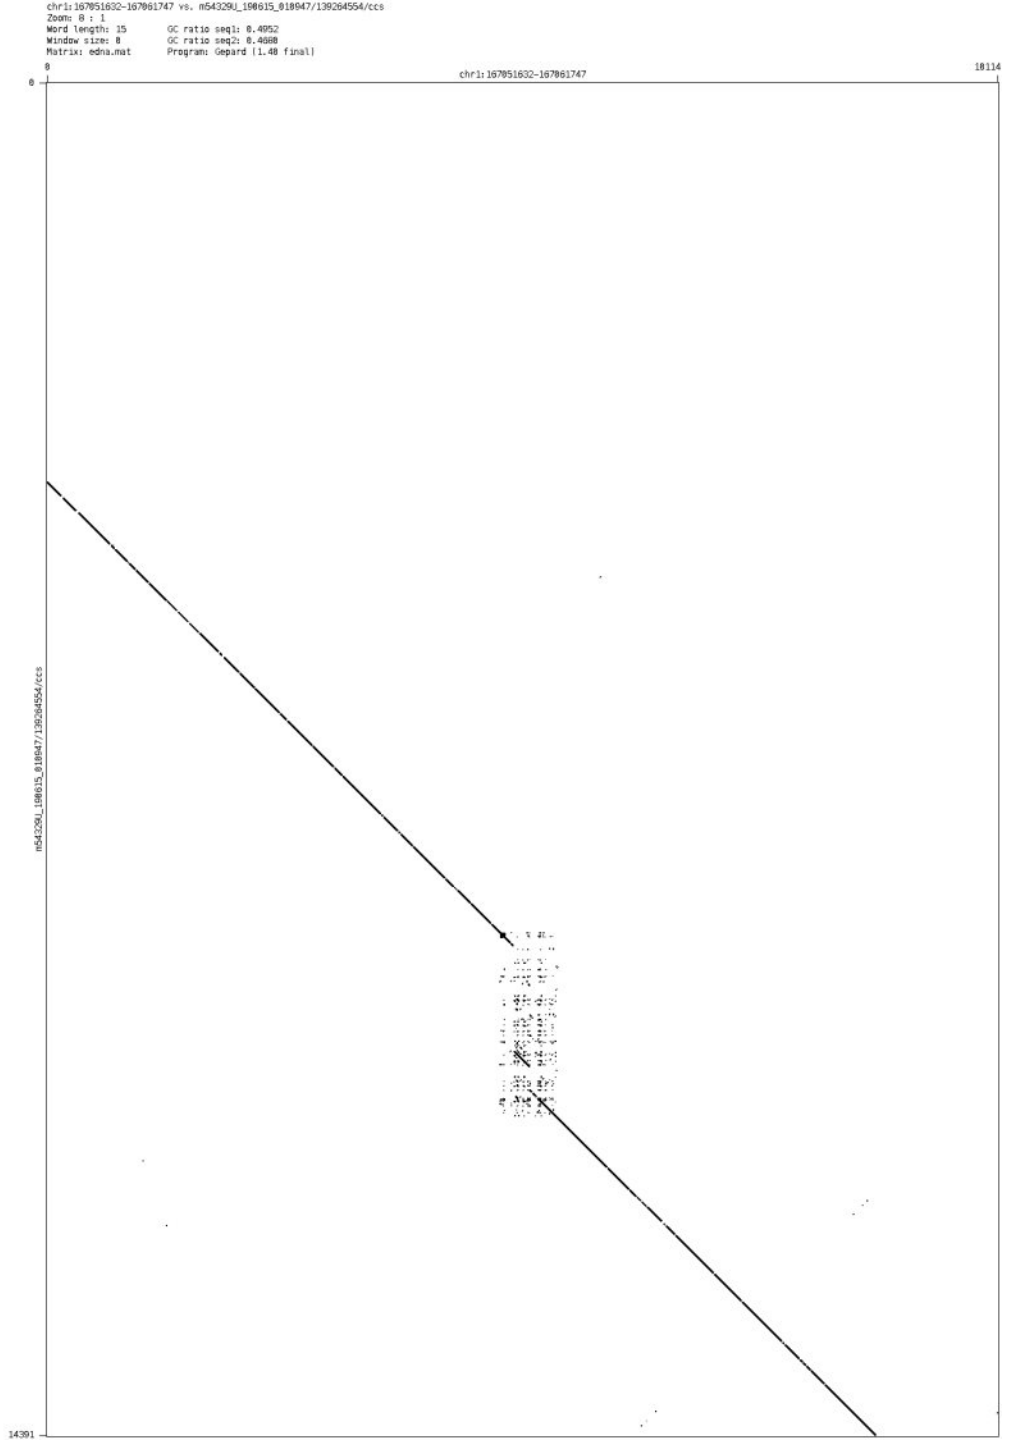

➤ chr1\_172694311\_172694449

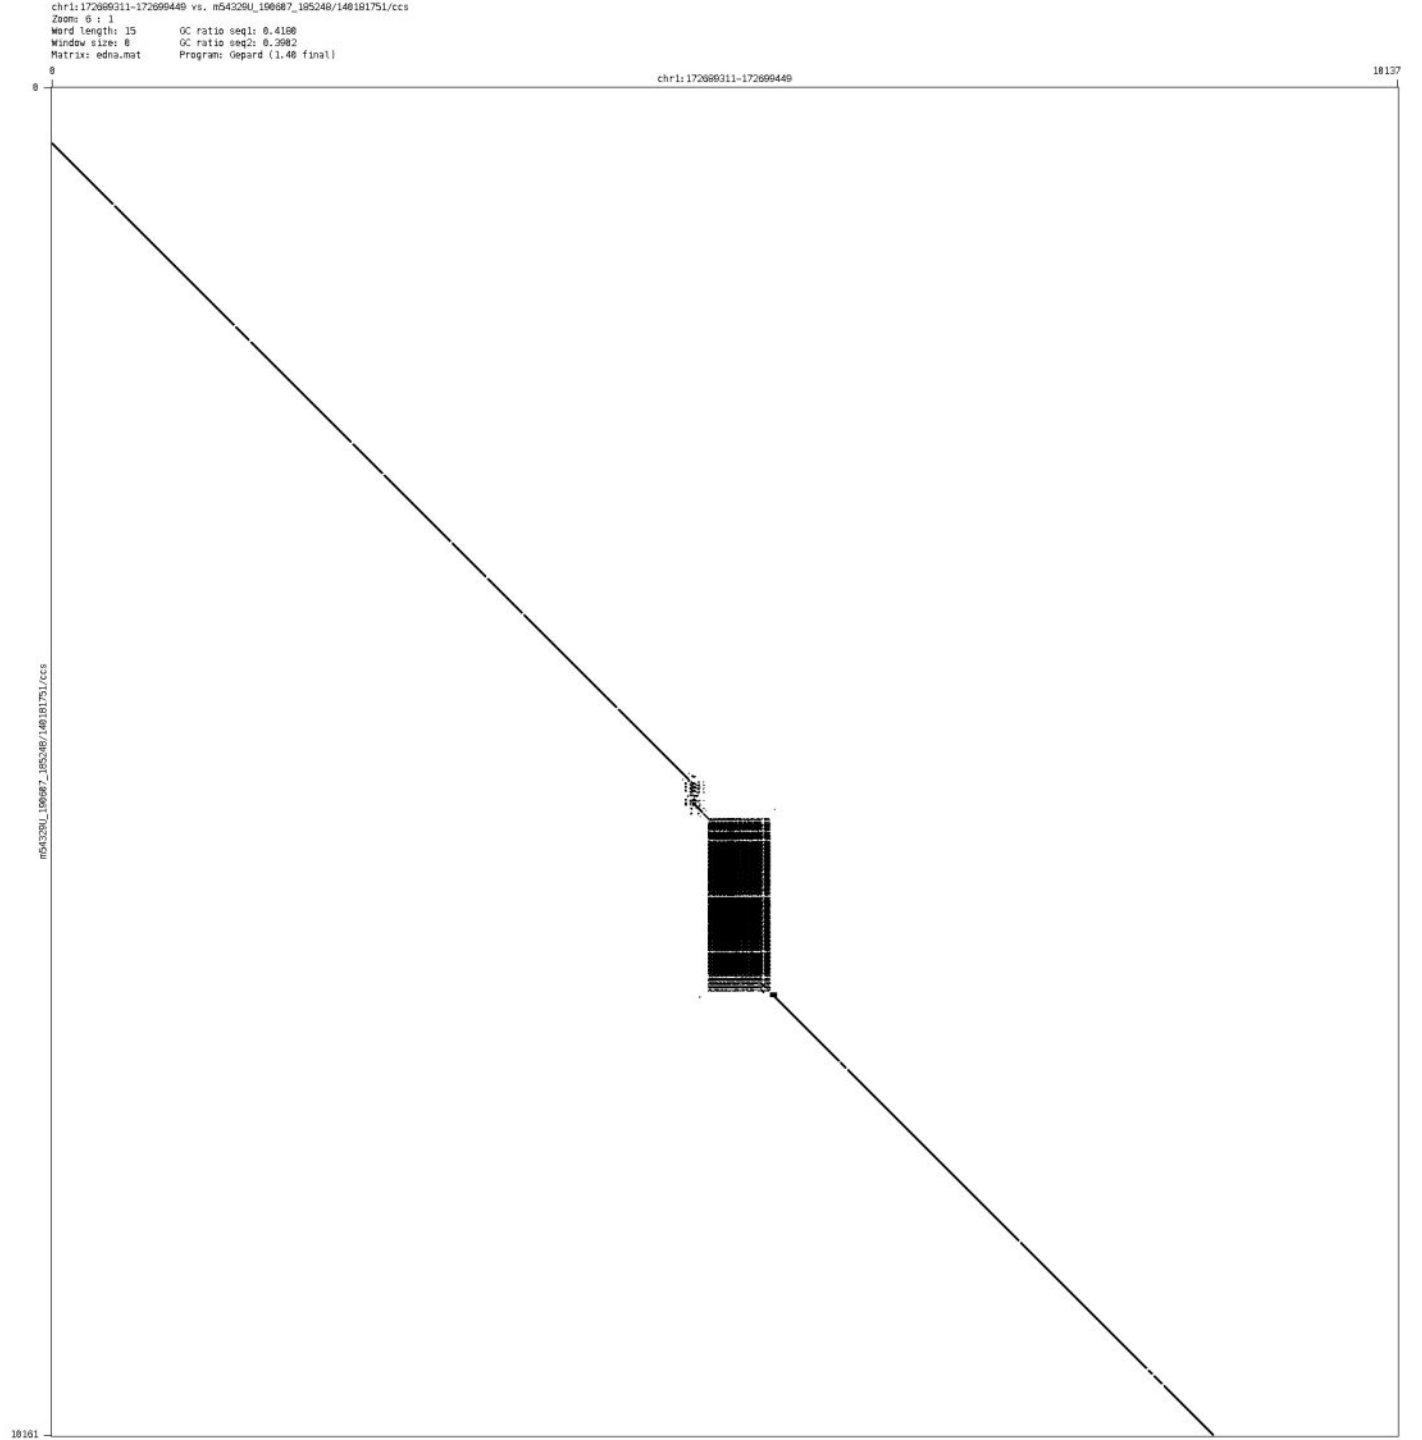

➤ chr1\_175231051\_175232802

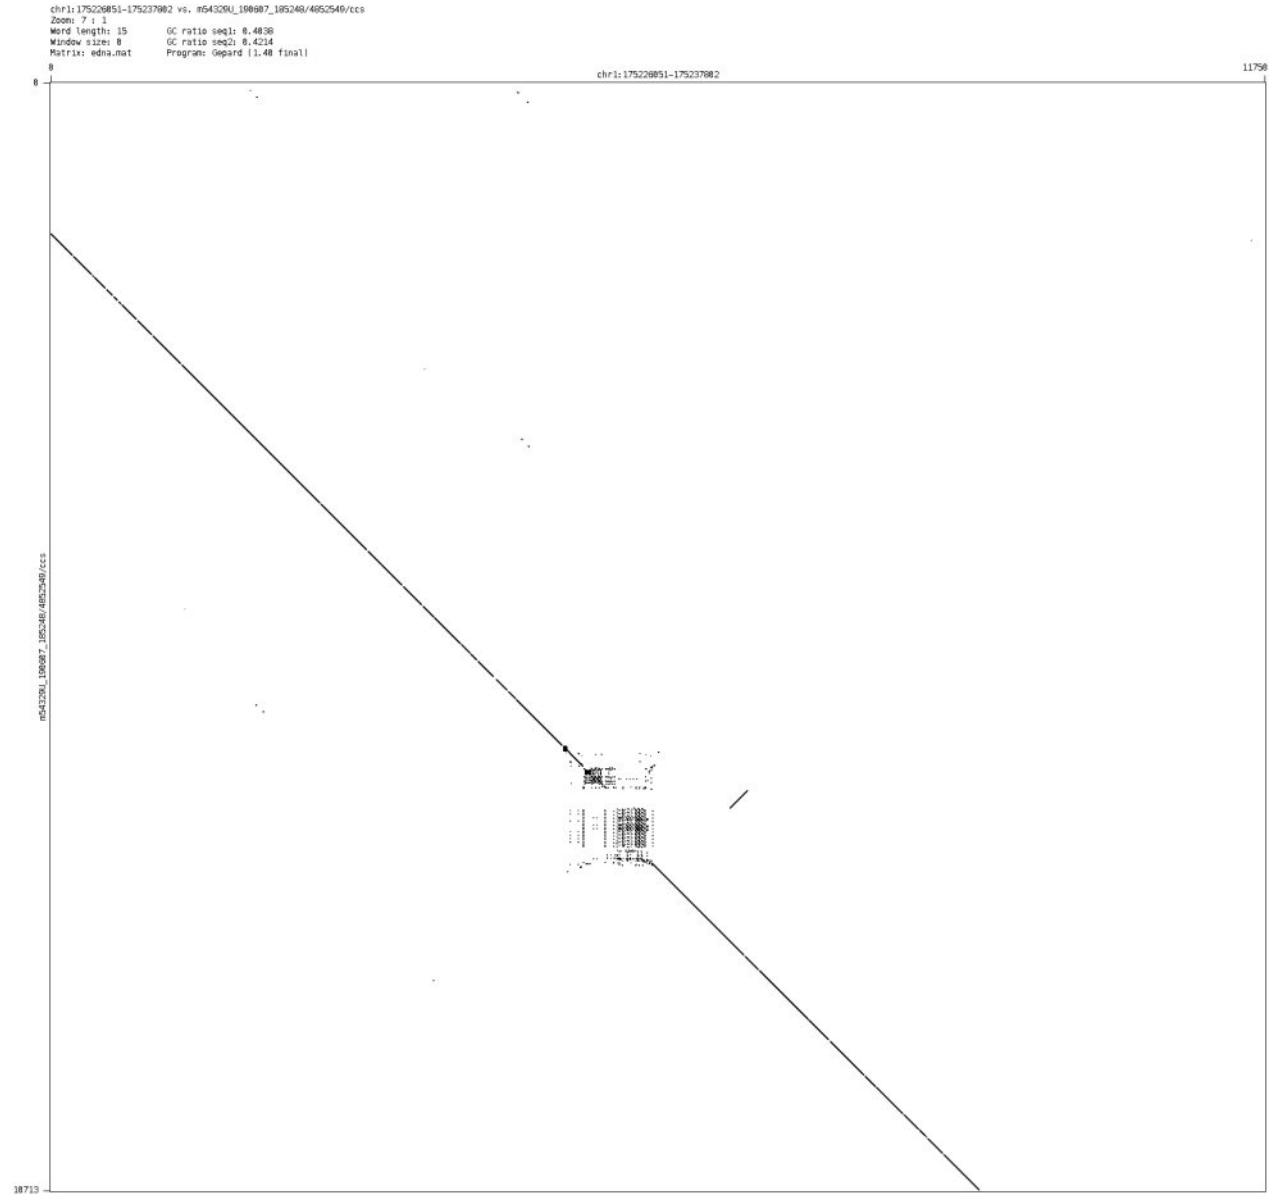

➤ chr1\_175650824\_175650946

chr1:175645824-175655946 vs. n54229U\_180887\_185248/113313145/ccs  
Zoom: 0 : 1  
Word length: 15 GC ratio seq1: 0.4311  
Window size: 0 GC ratio seq2: 0.4451  
Matrix: edna.mat Program: Gepard (1.48 final)

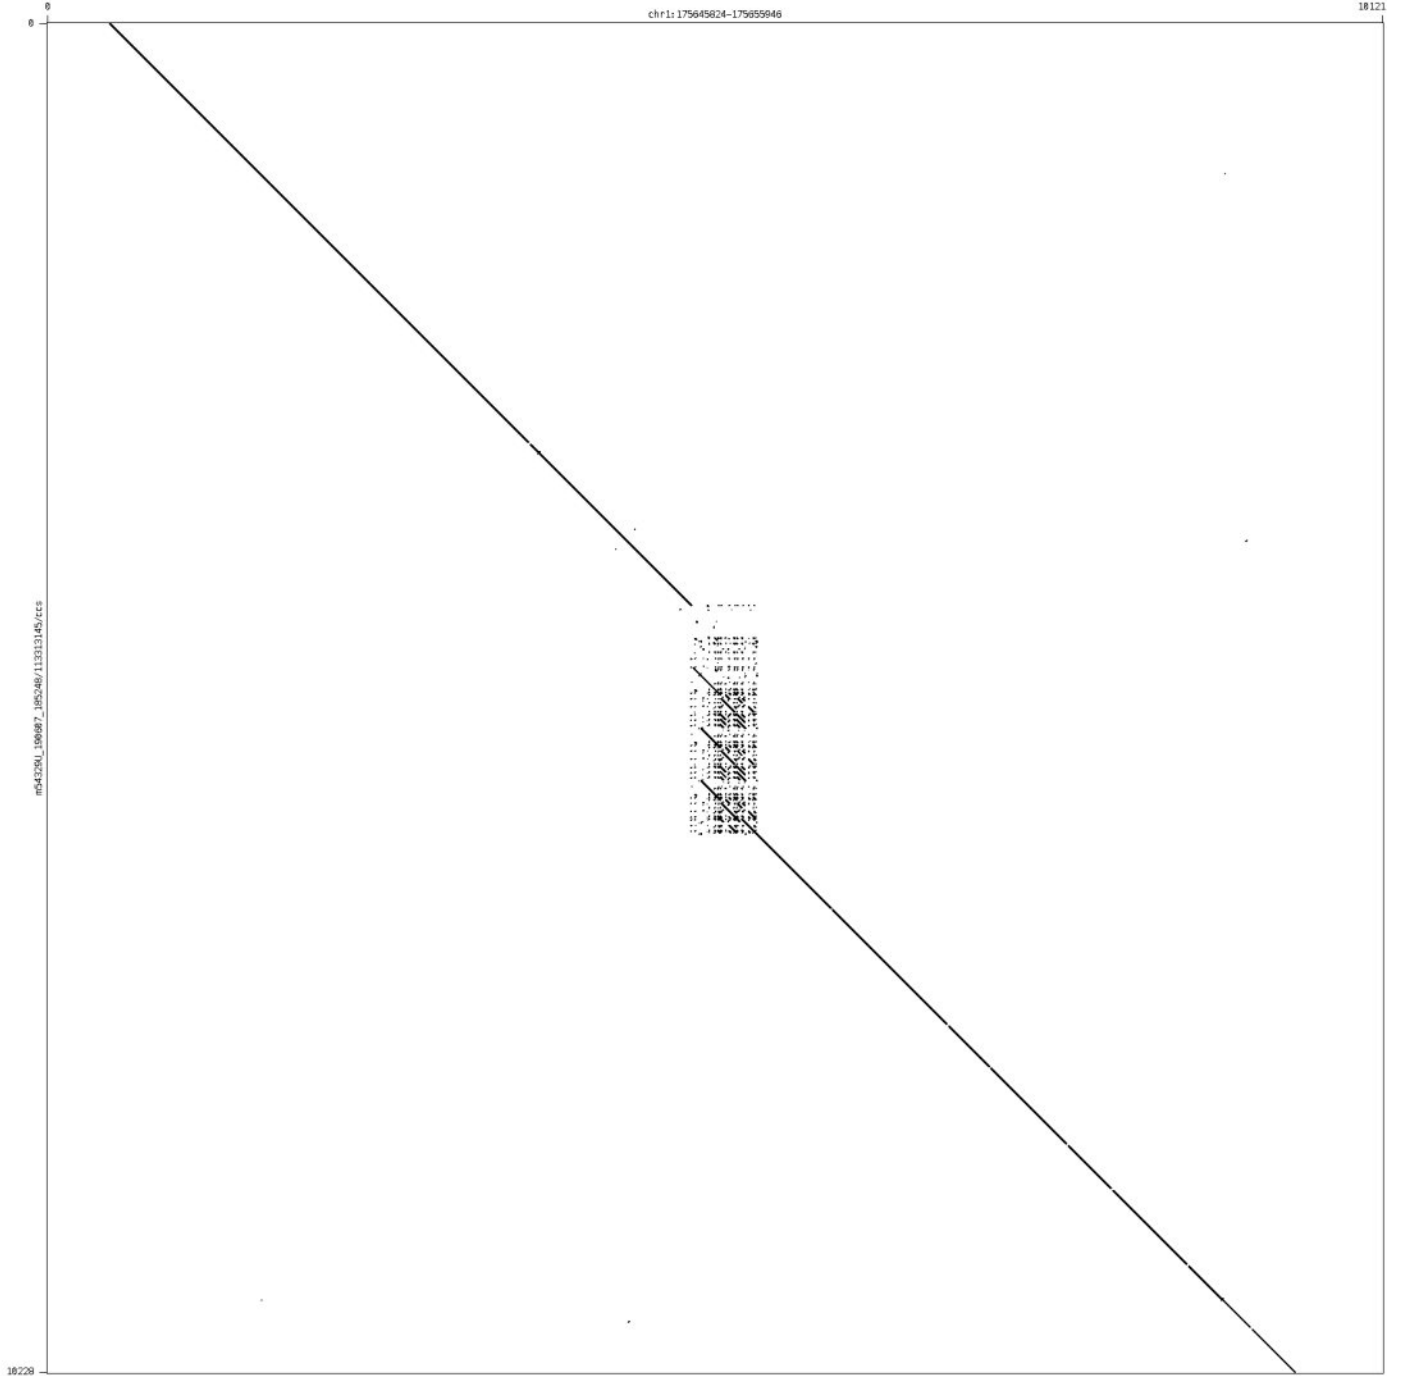

➤ chr1\_187495434\_187497604

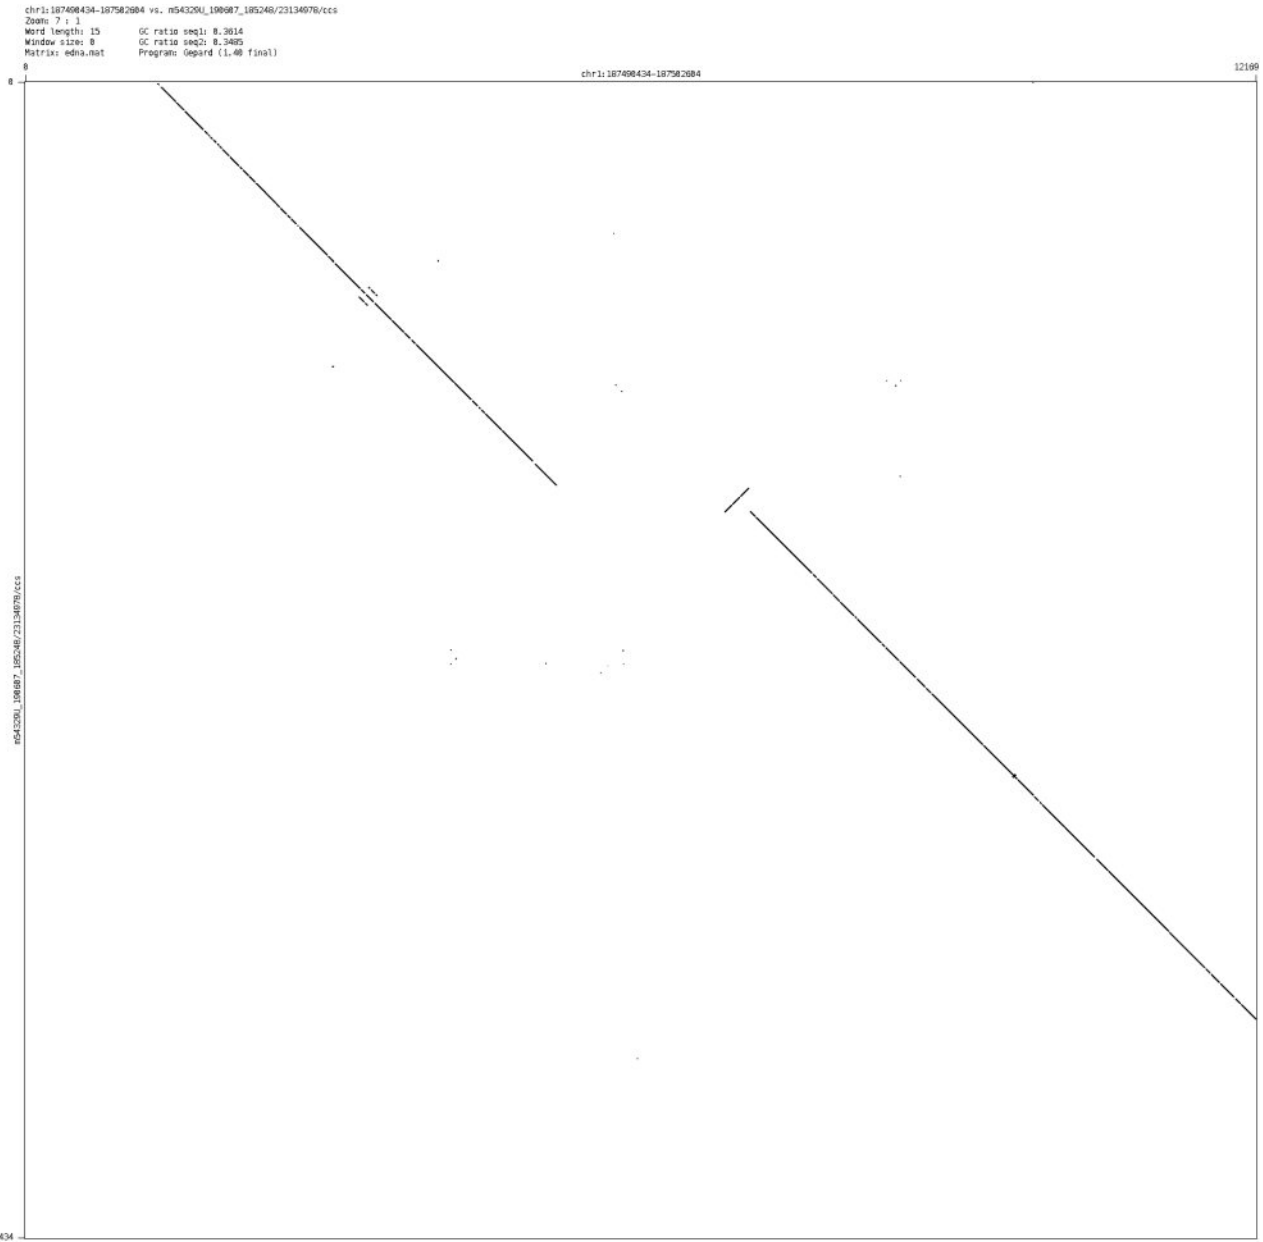

➤ chr1\_202204526\_202205476

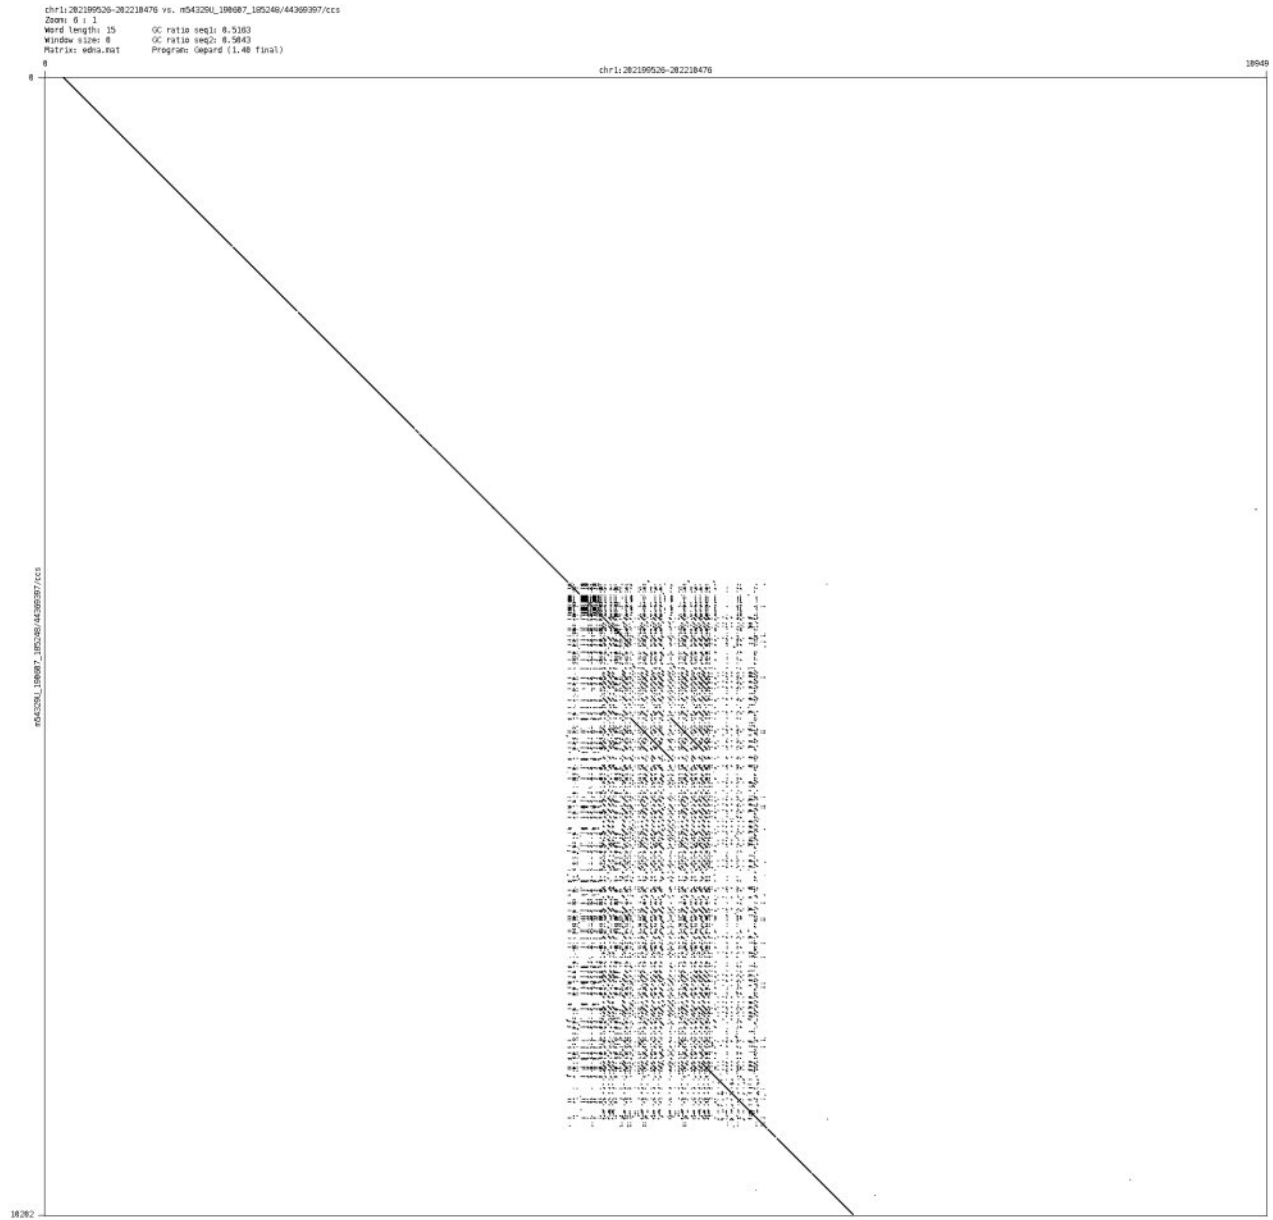



➤ chr1\_202625025\_202625085

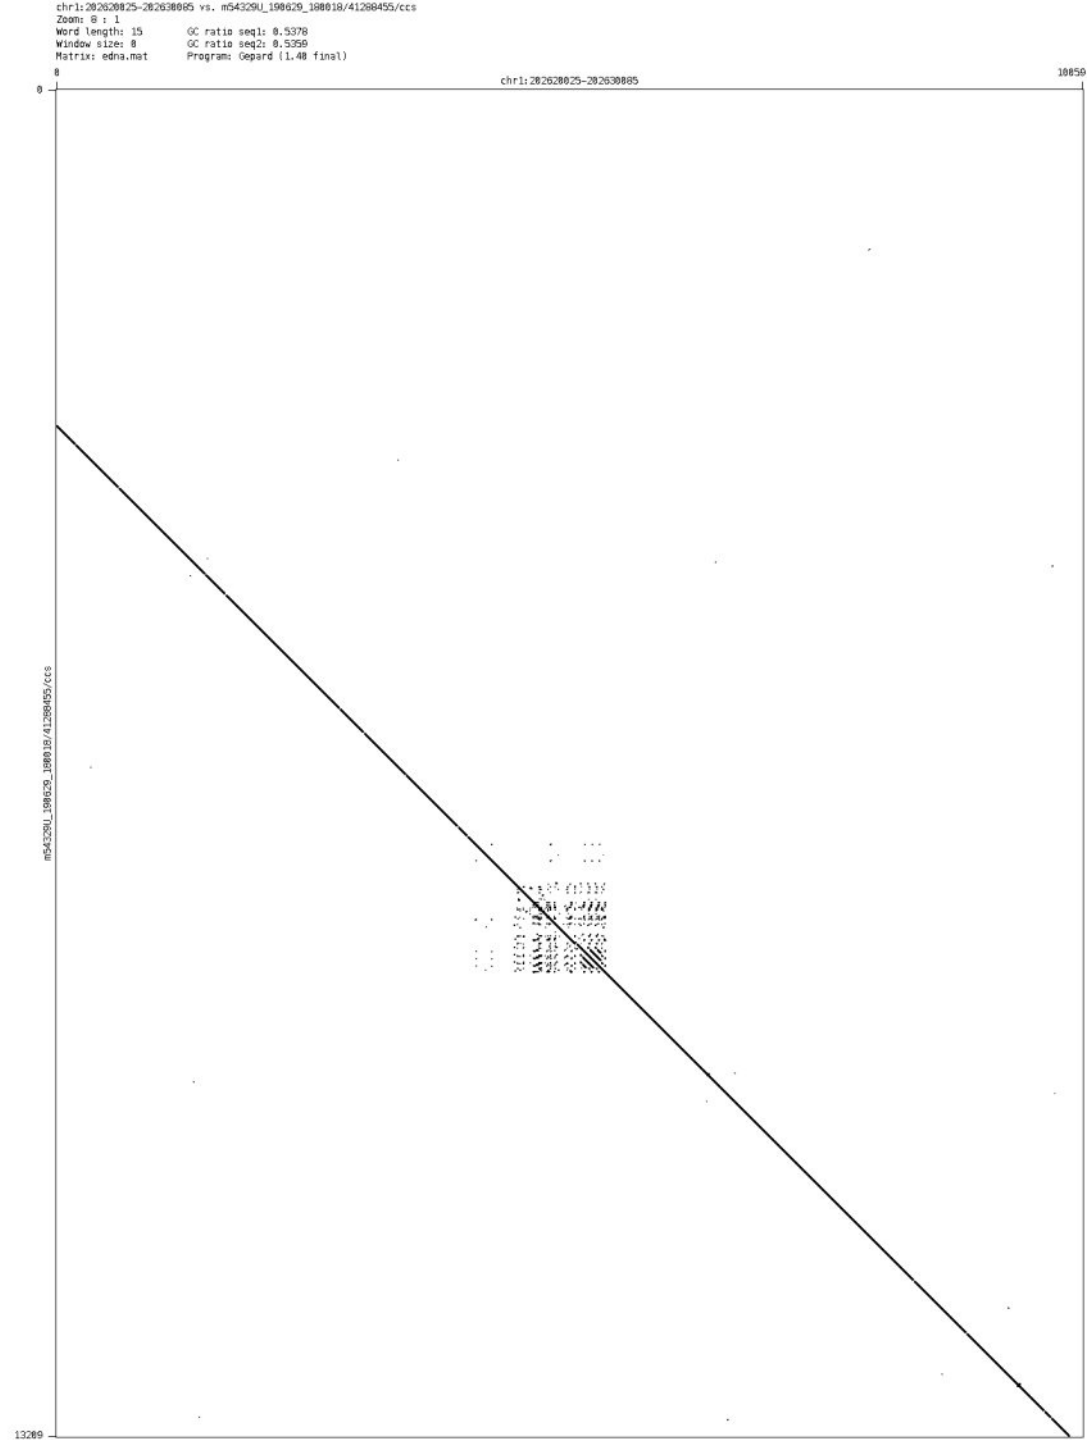

➤ chr1\_206924211\_206924525

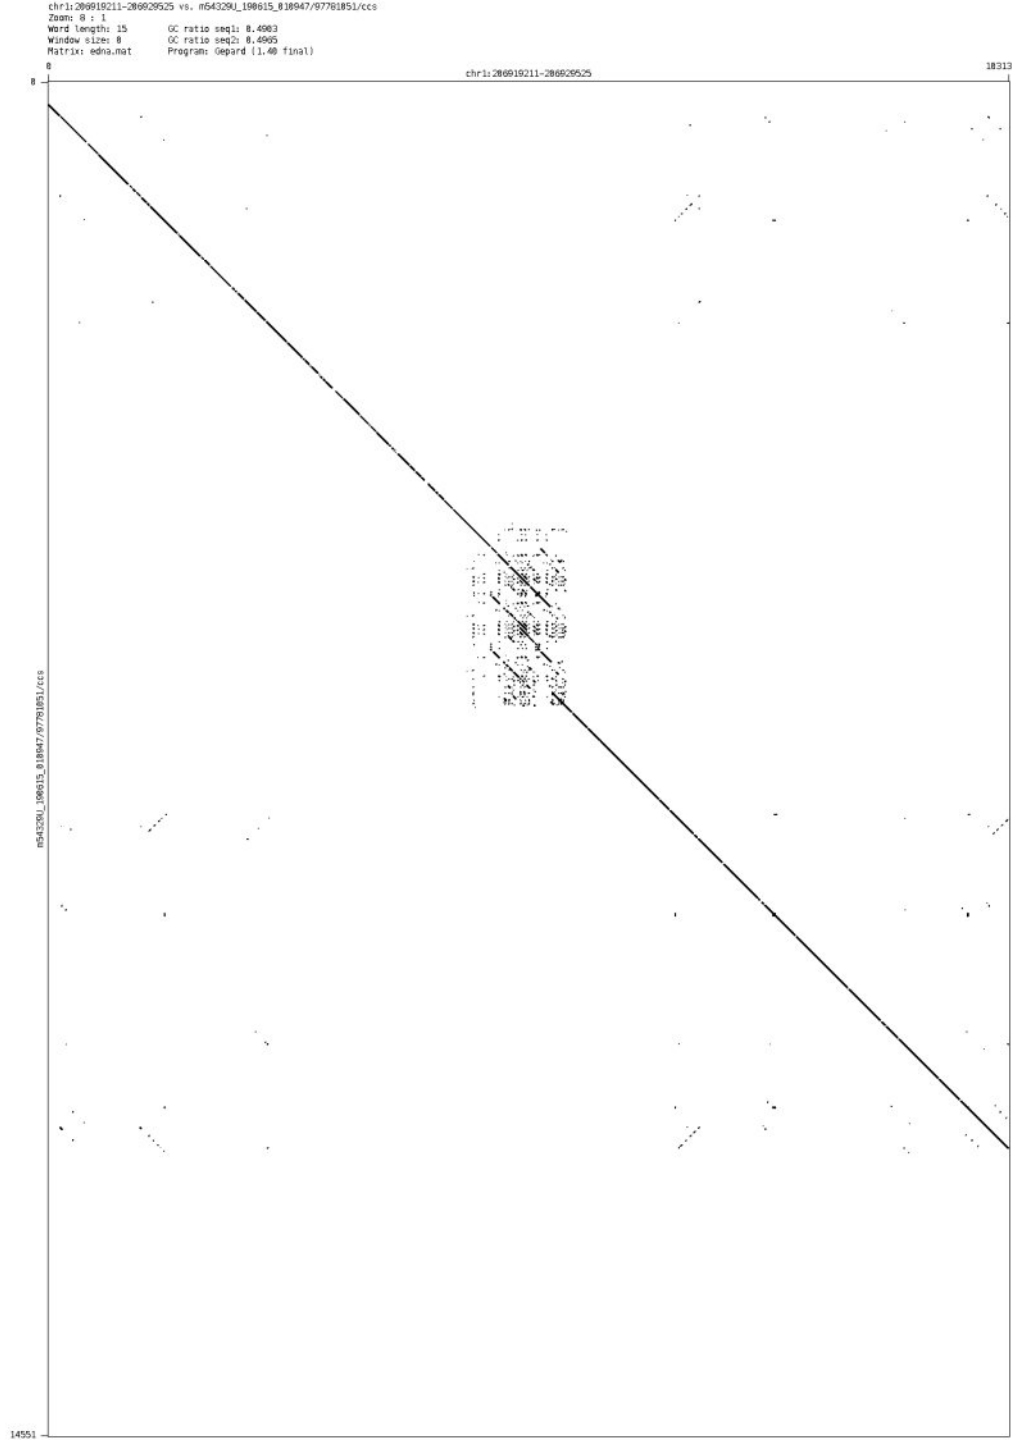

➤ chr1\_207118600\_207120000

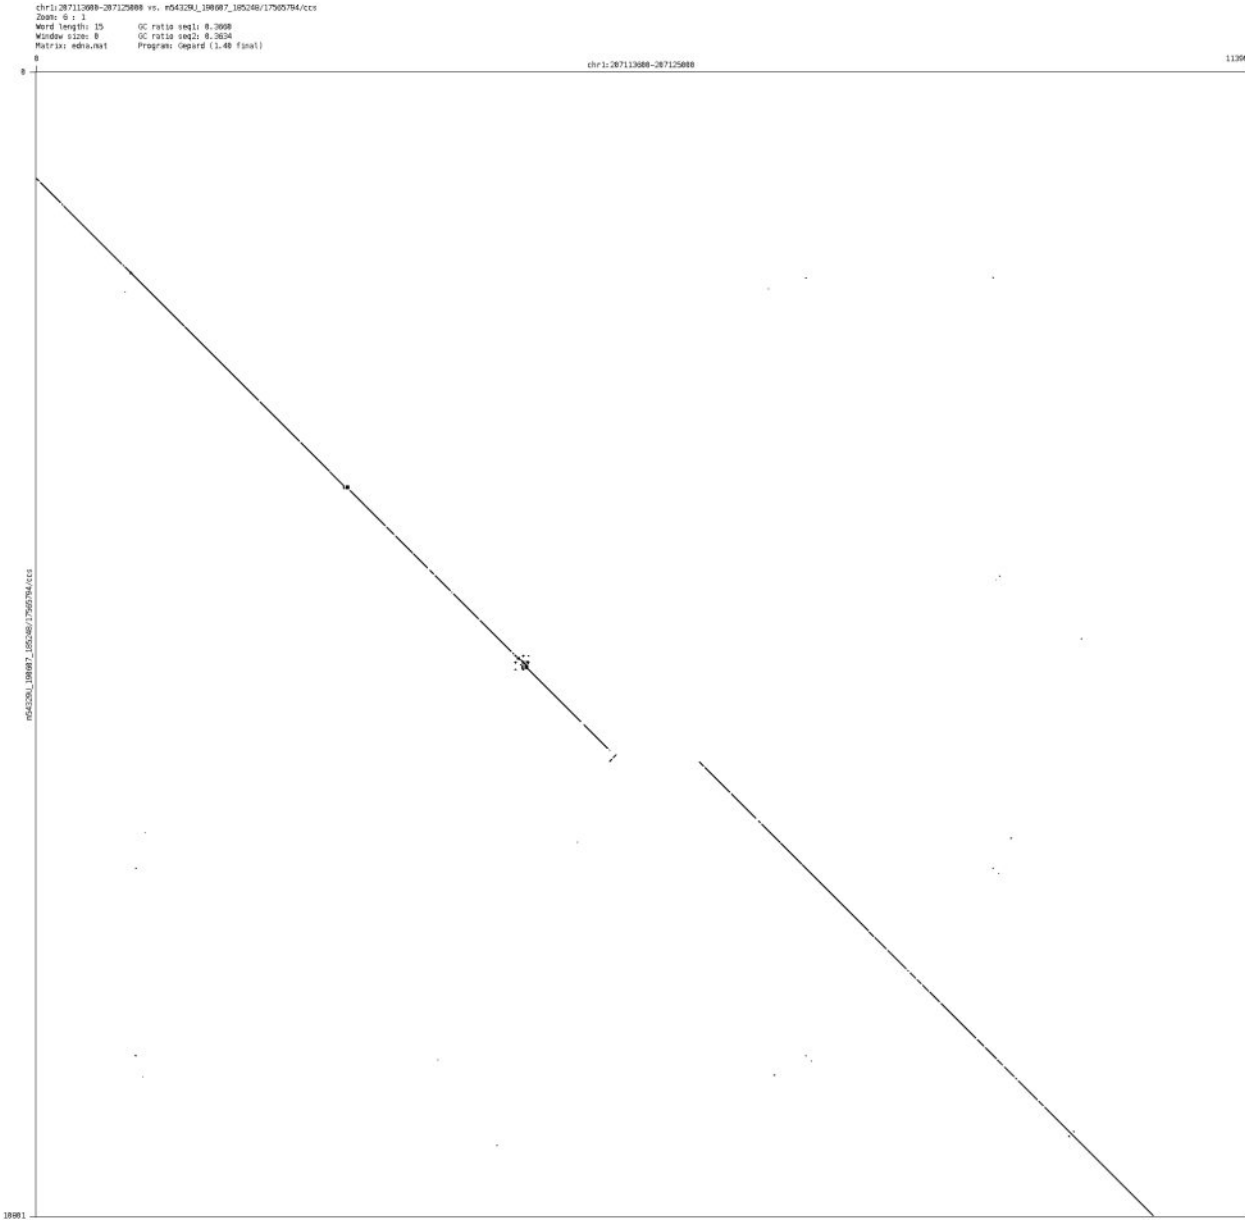

➤ chr1\_231202060\_231202180

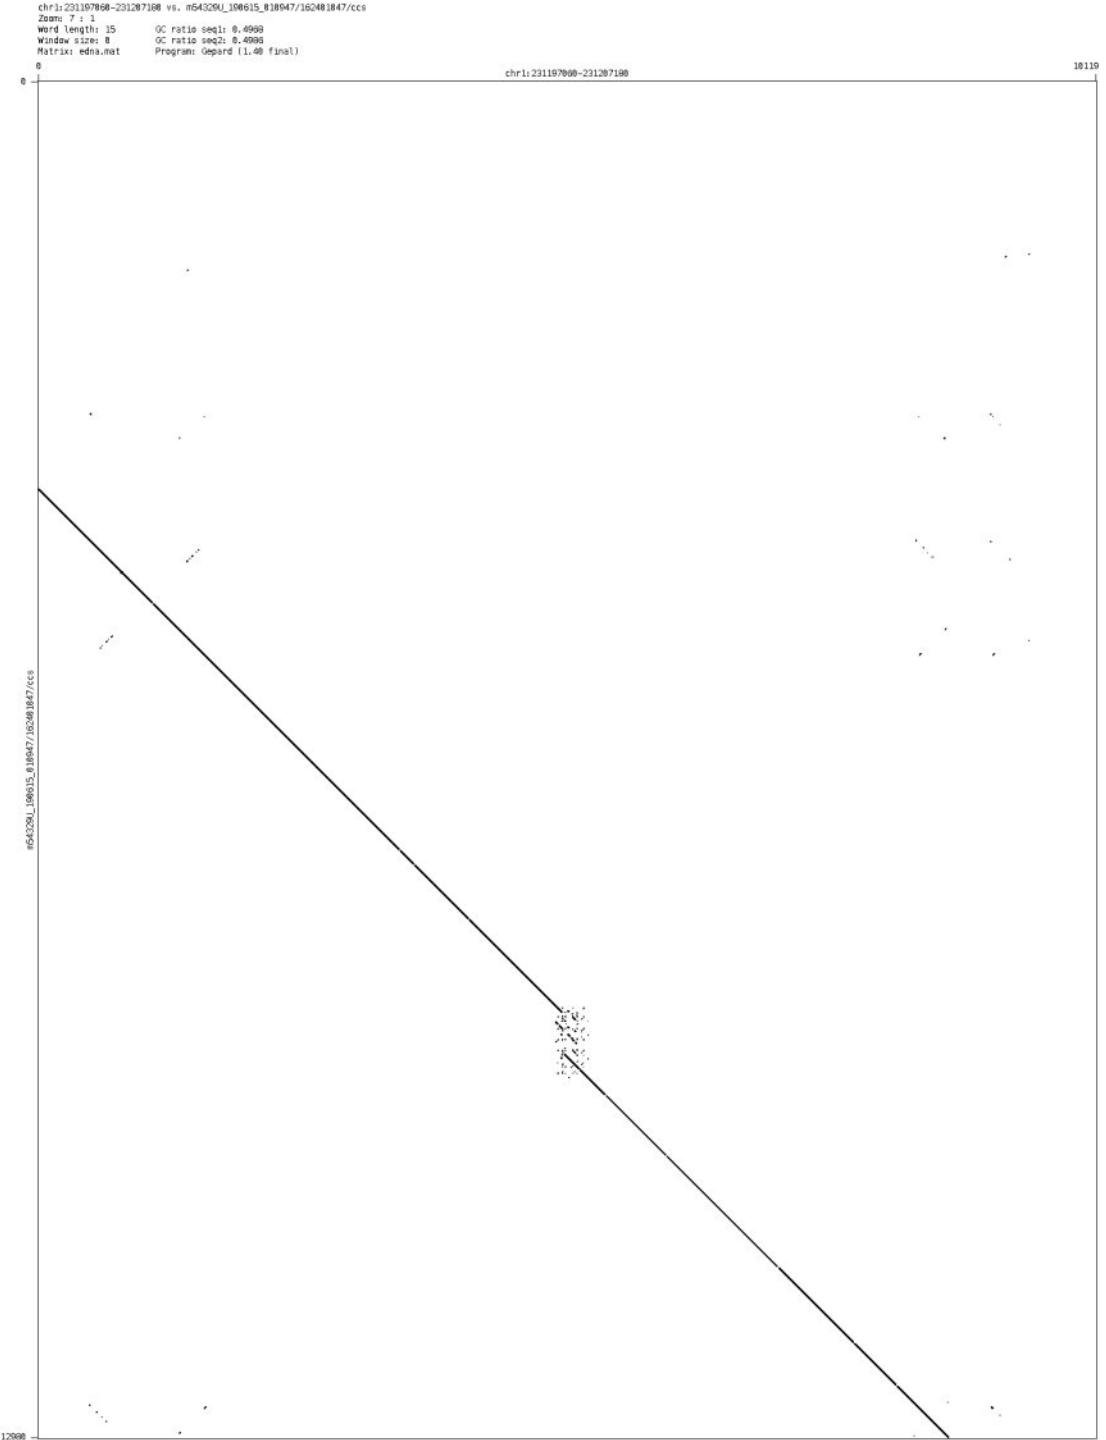

➤ chr1\_234247922\_234248122

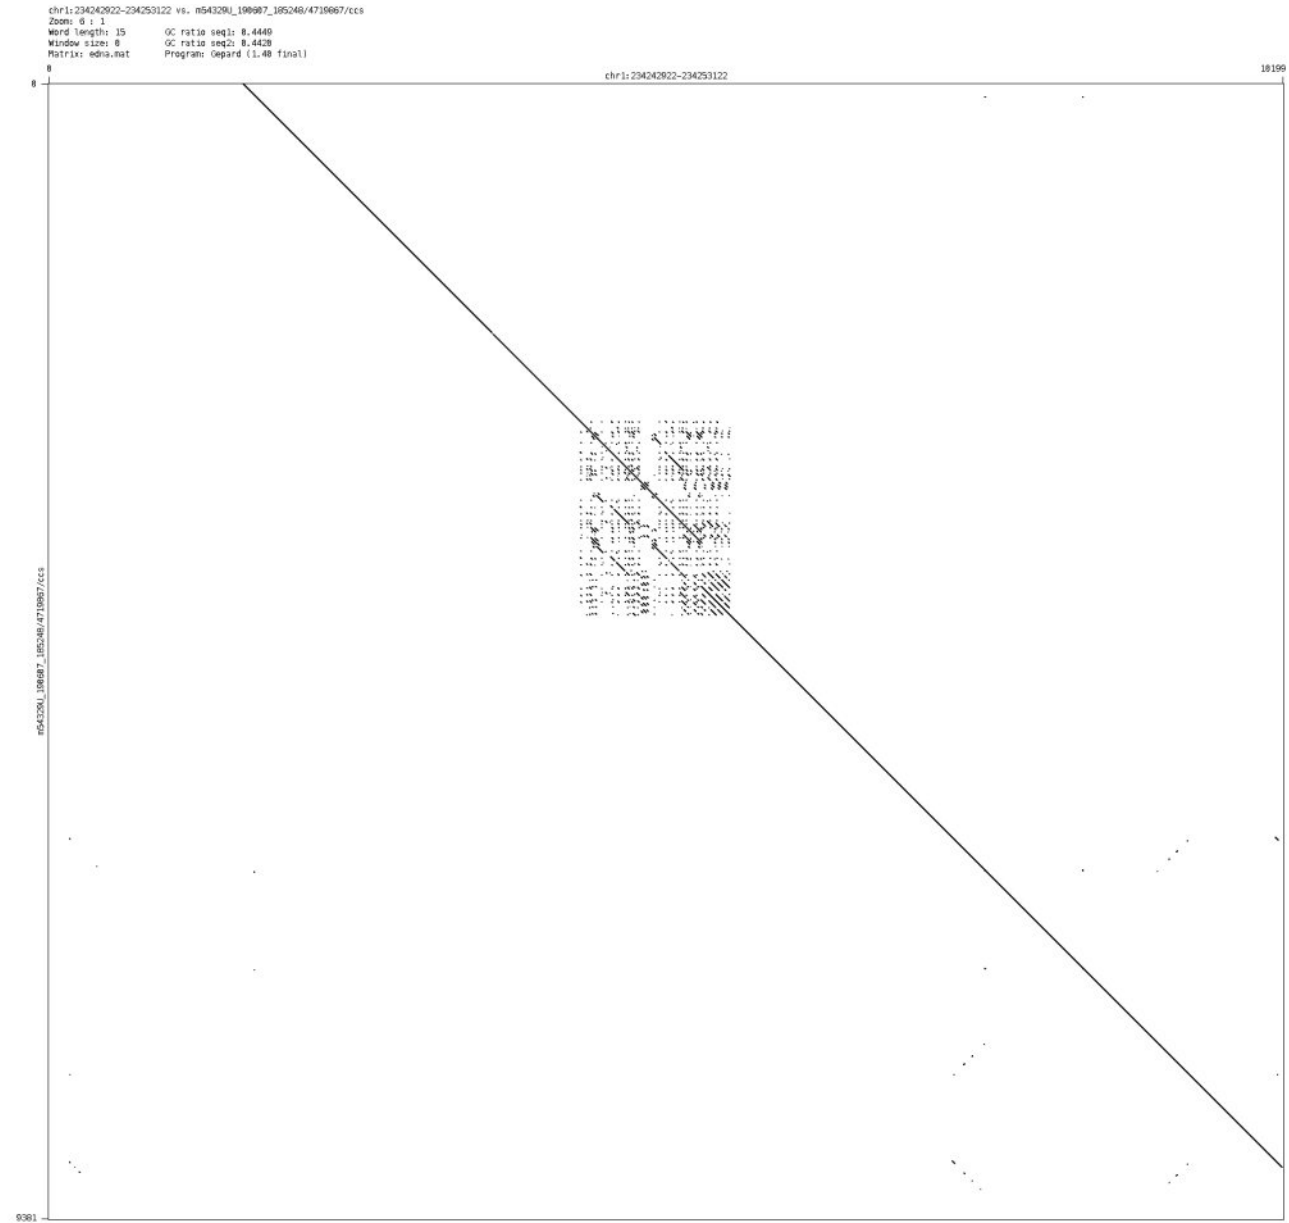

➤ chr1\_235078305\_235078561

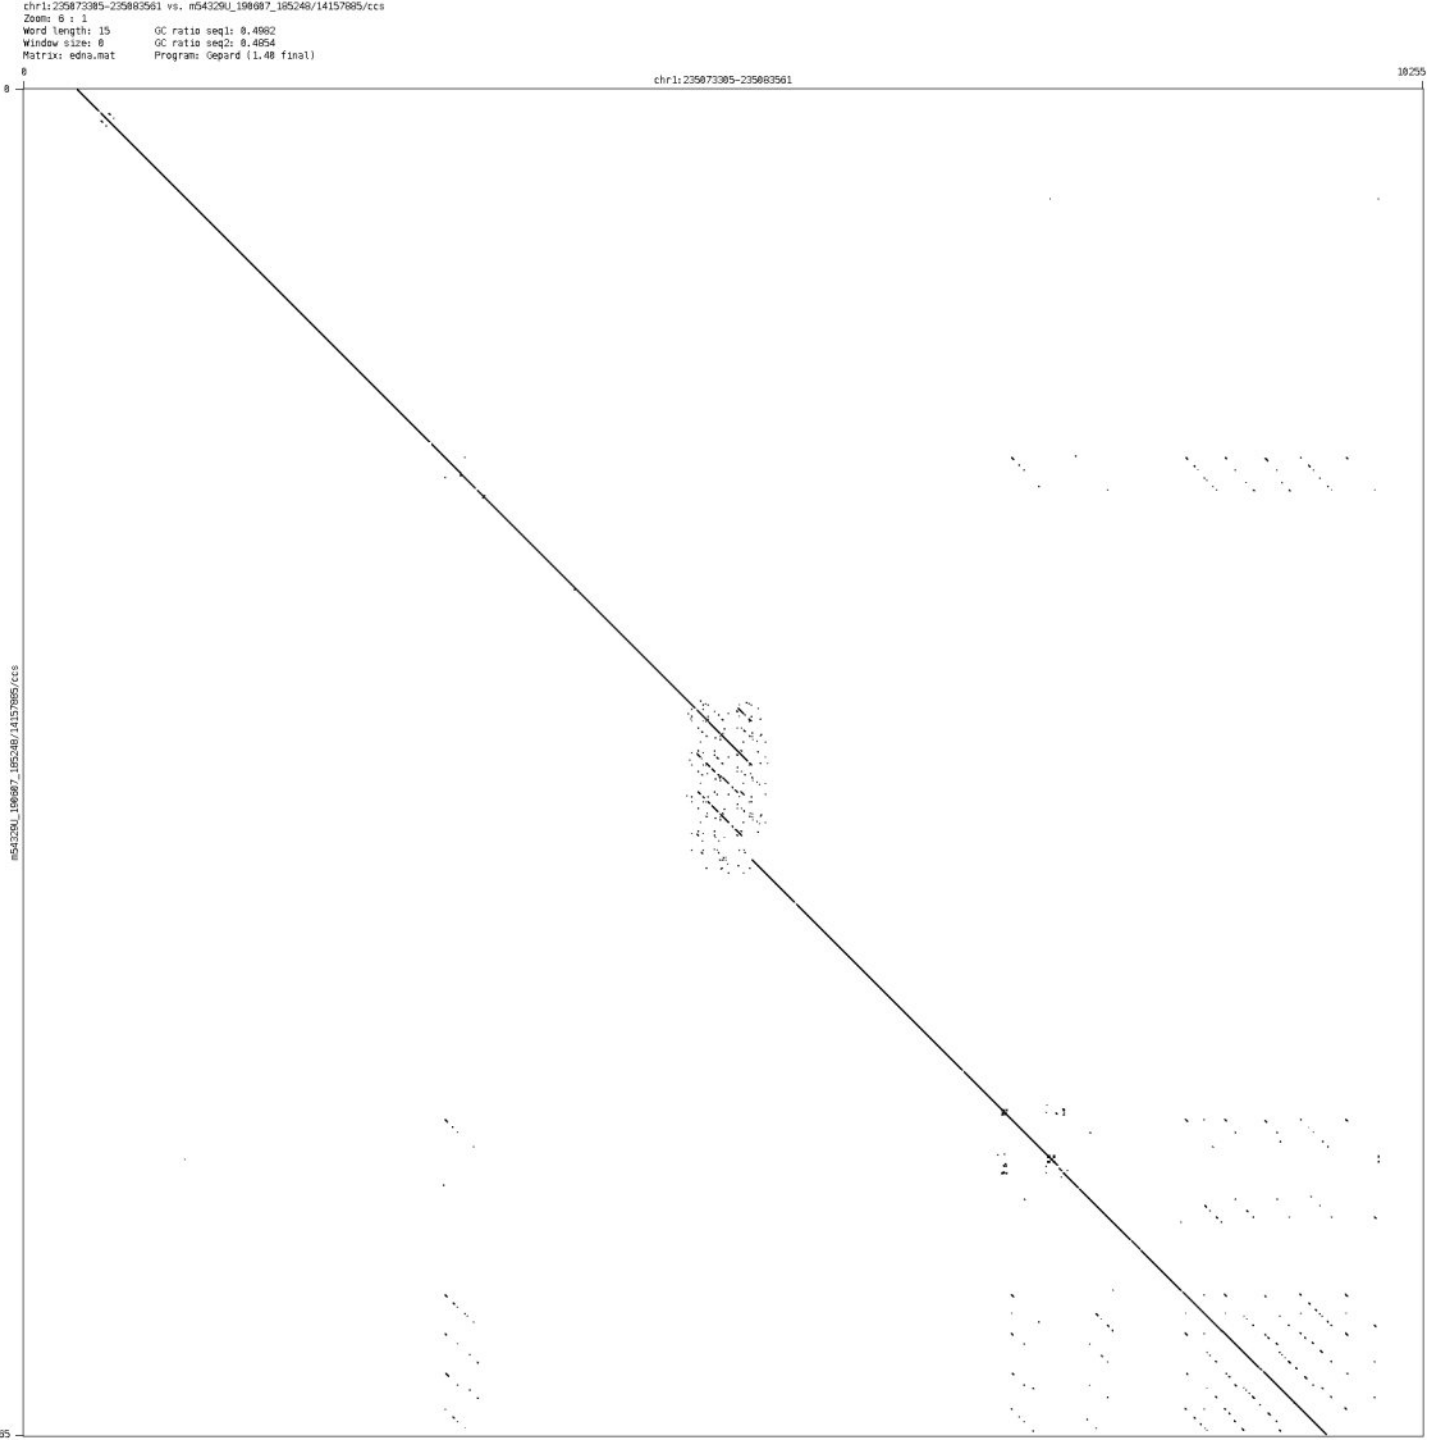

➤ chr1\_243480631\_243480726

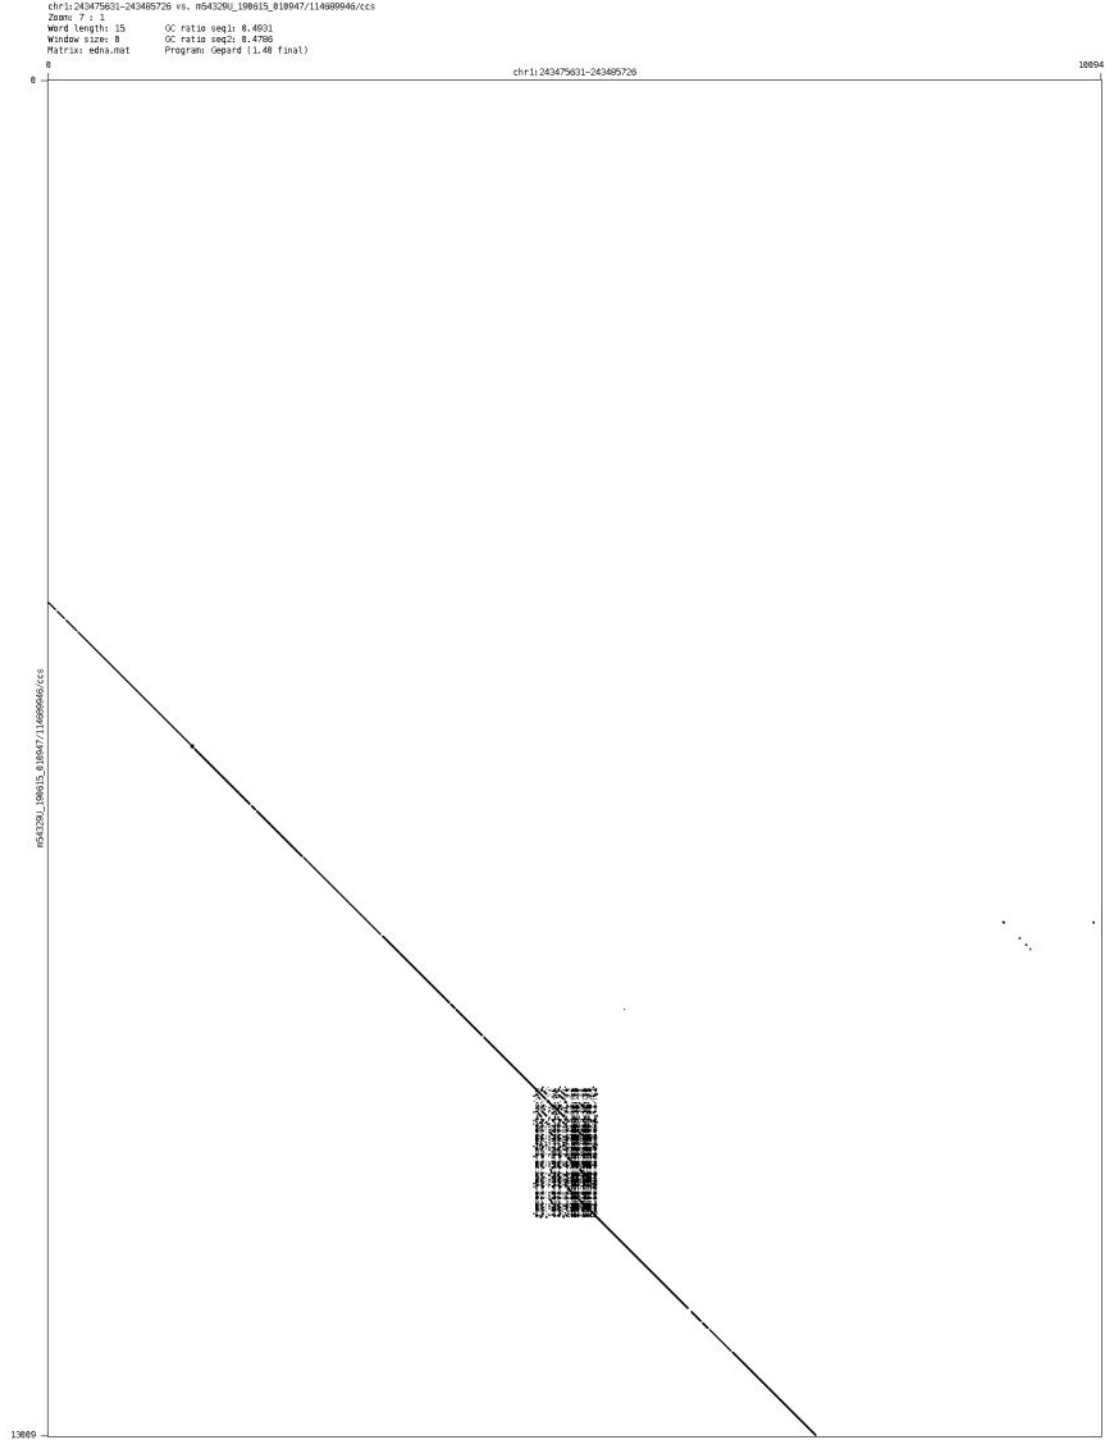

➤ chr1\_246244294\_246247399

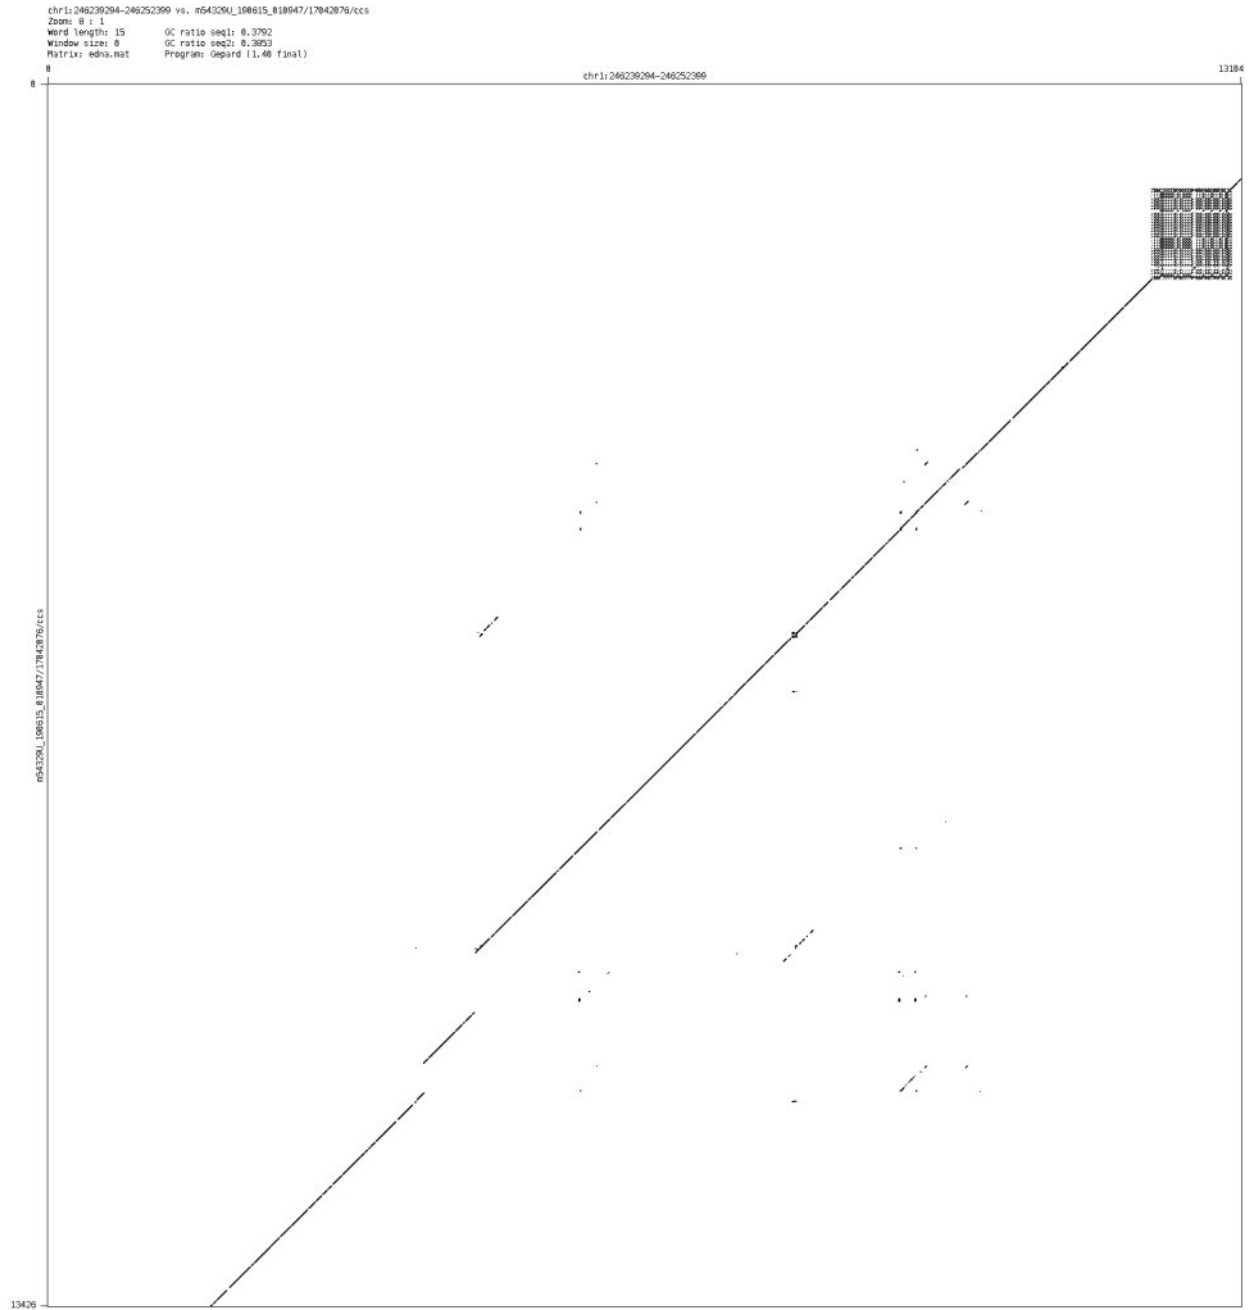



➤ chr2\_1106532\_1106732

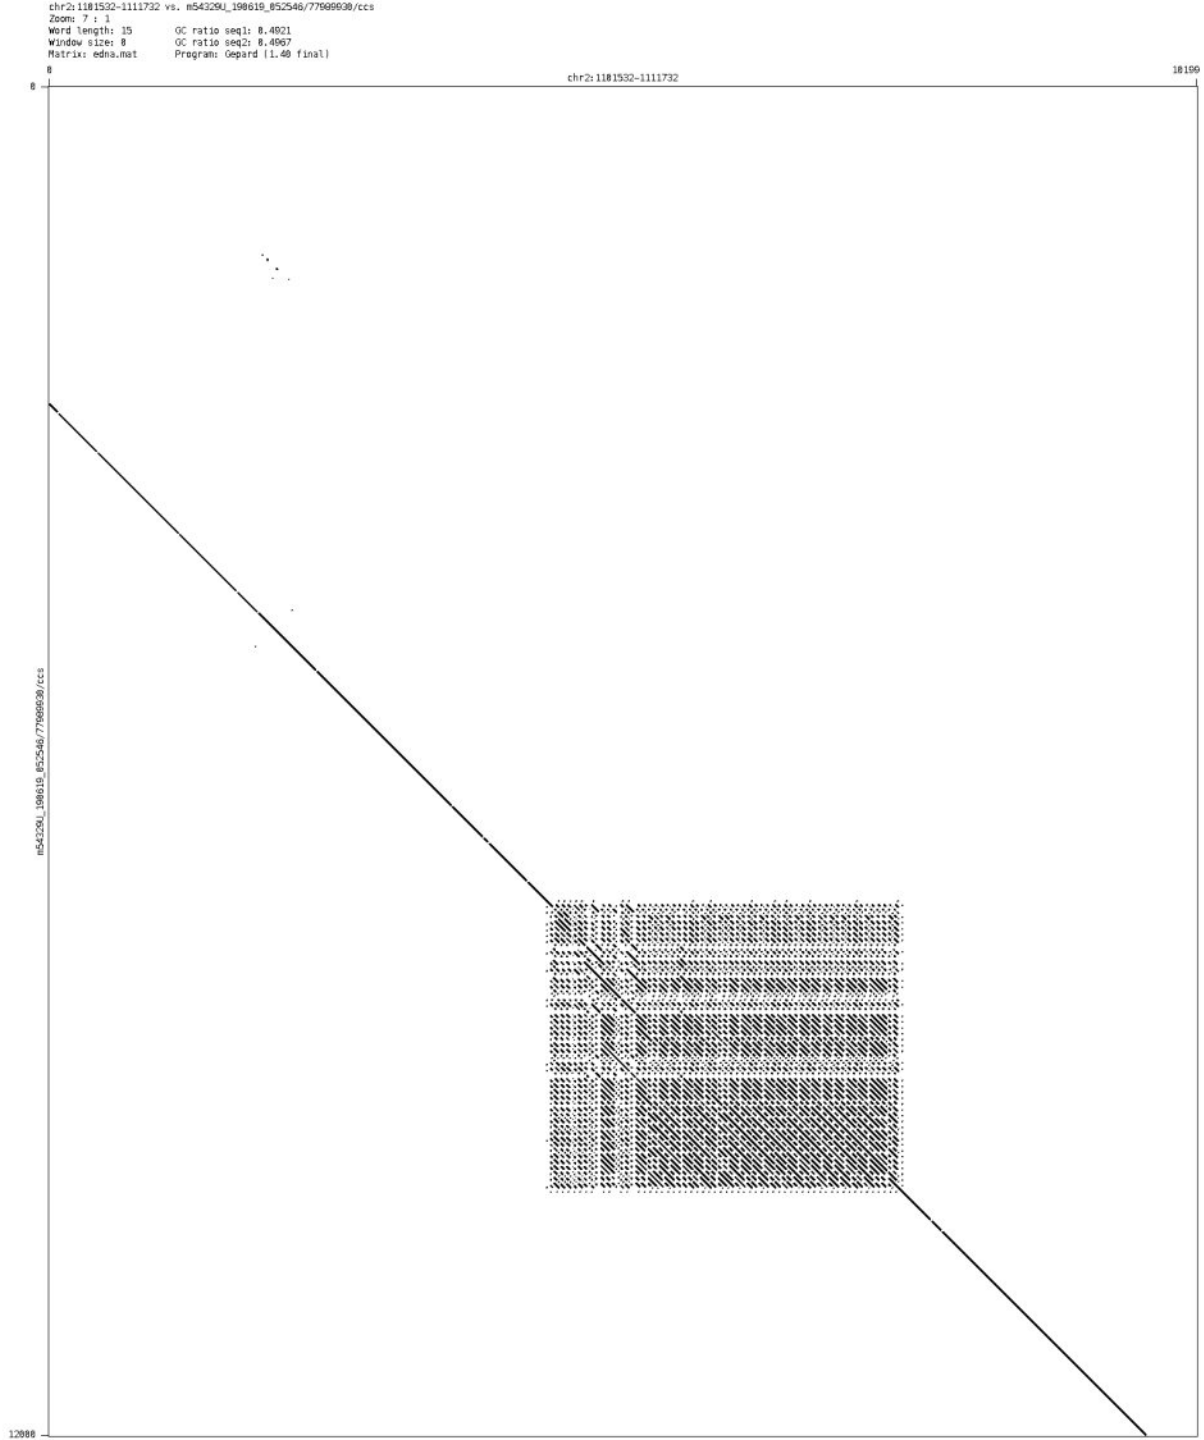

➤ chr2\_1281271\_1281469

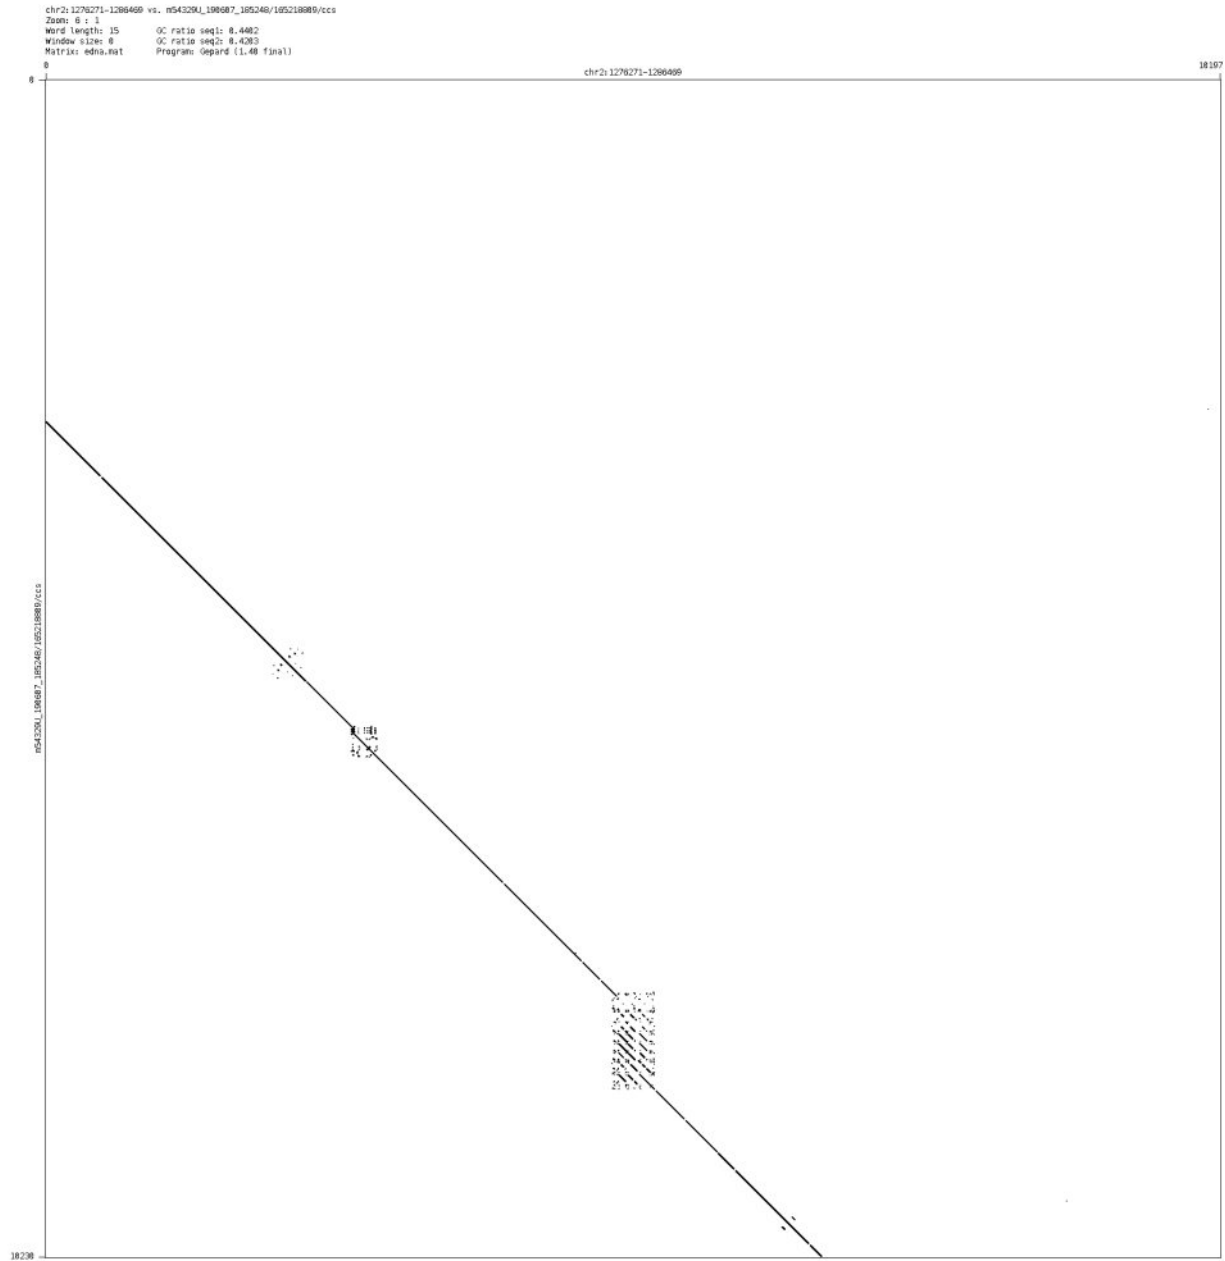

➤ chr2\_1750529\_1750651

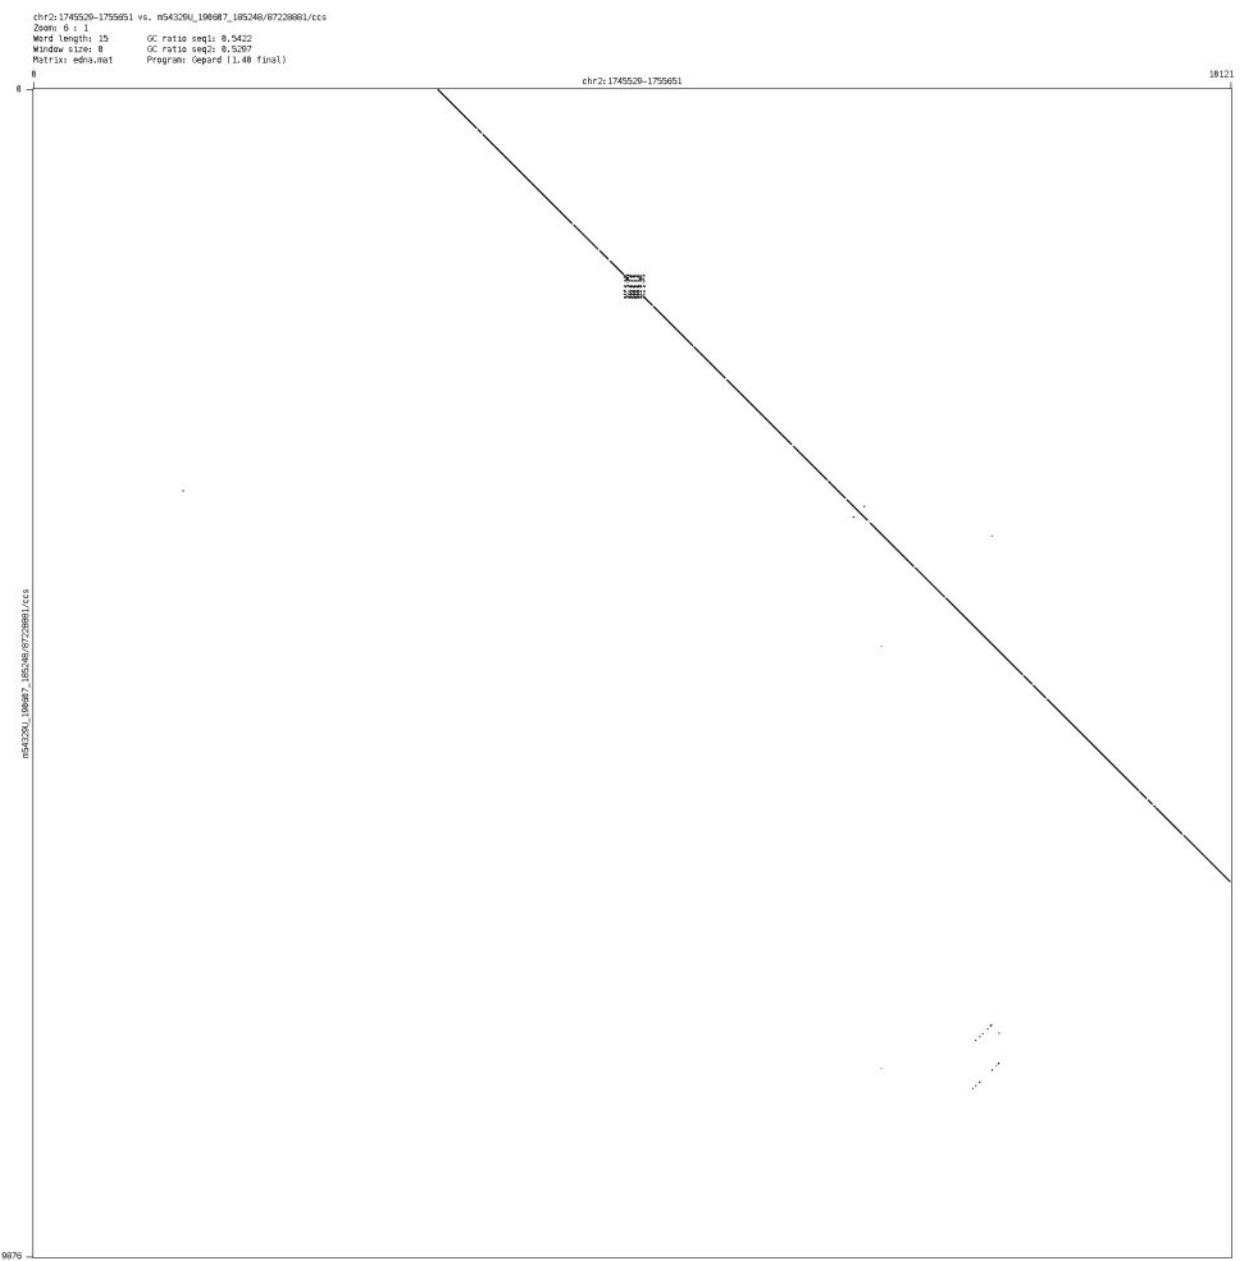

➤ chr2\_1861782\_1861968

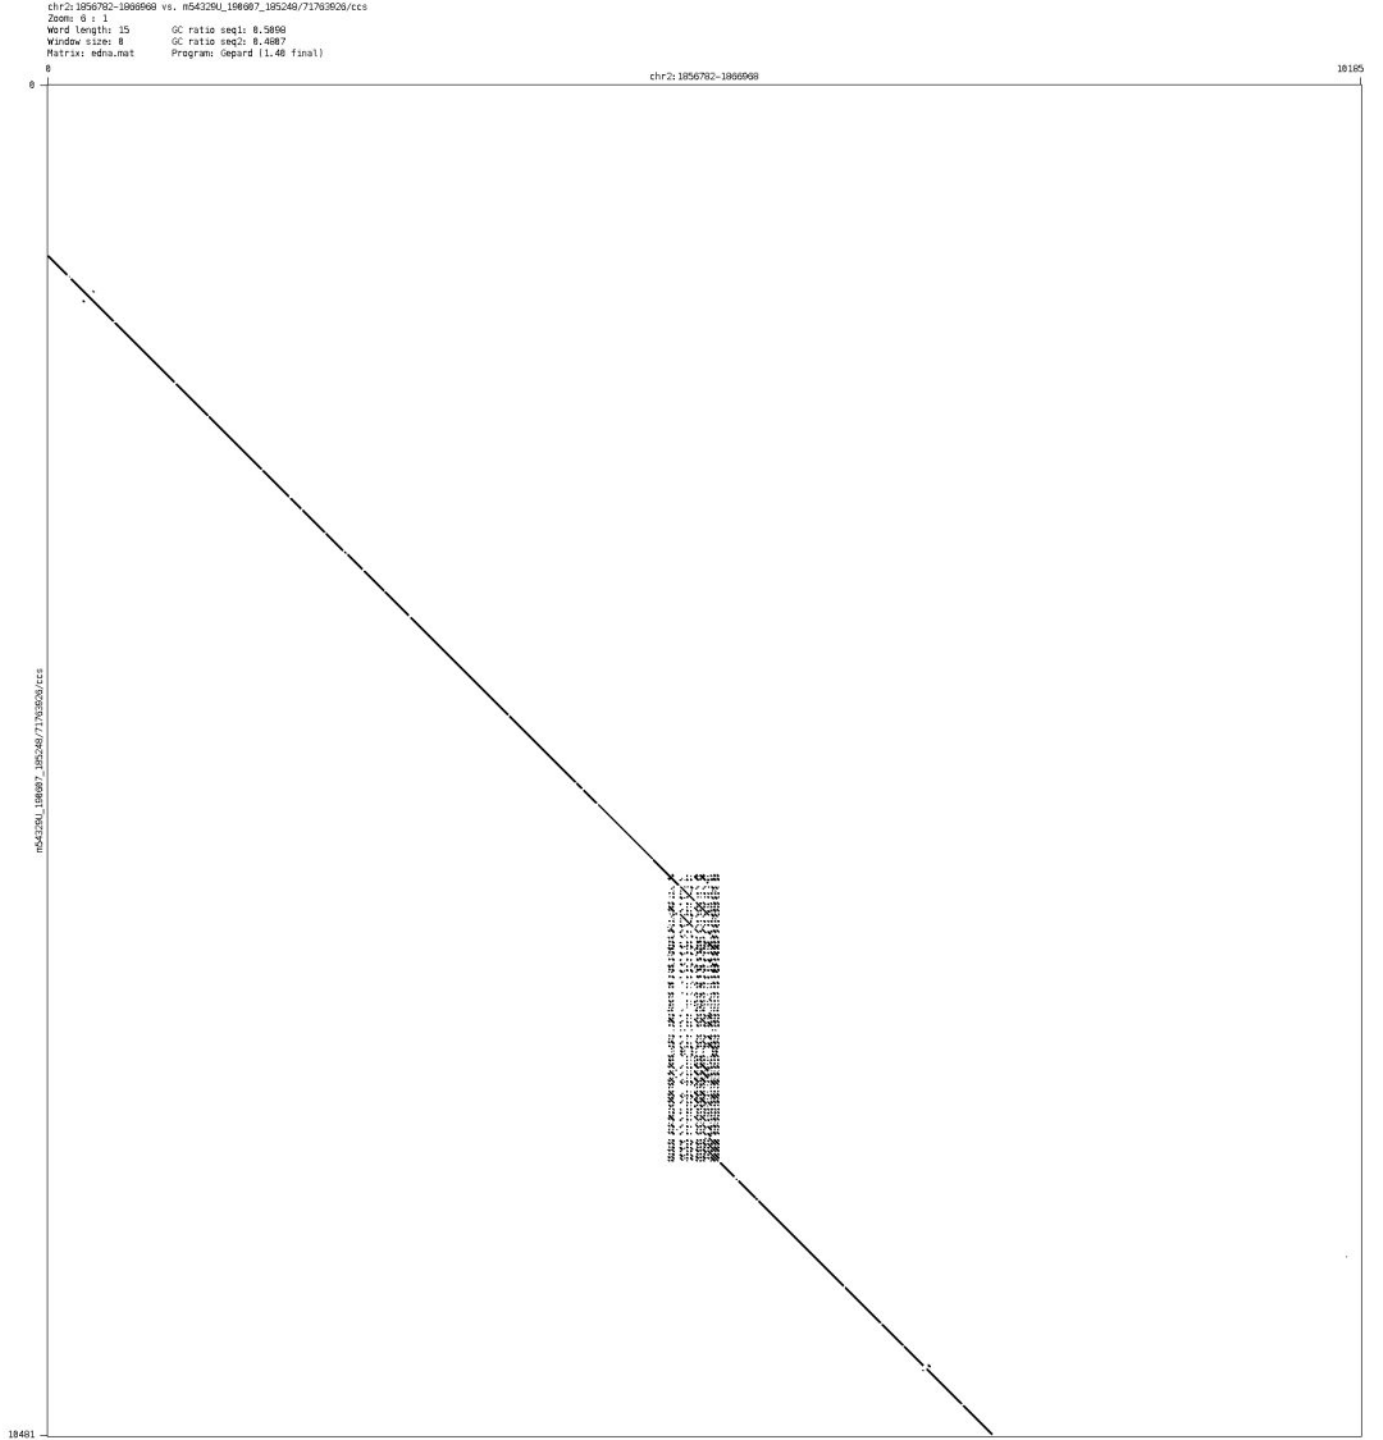

➤ chr2\_3057865\_3057980

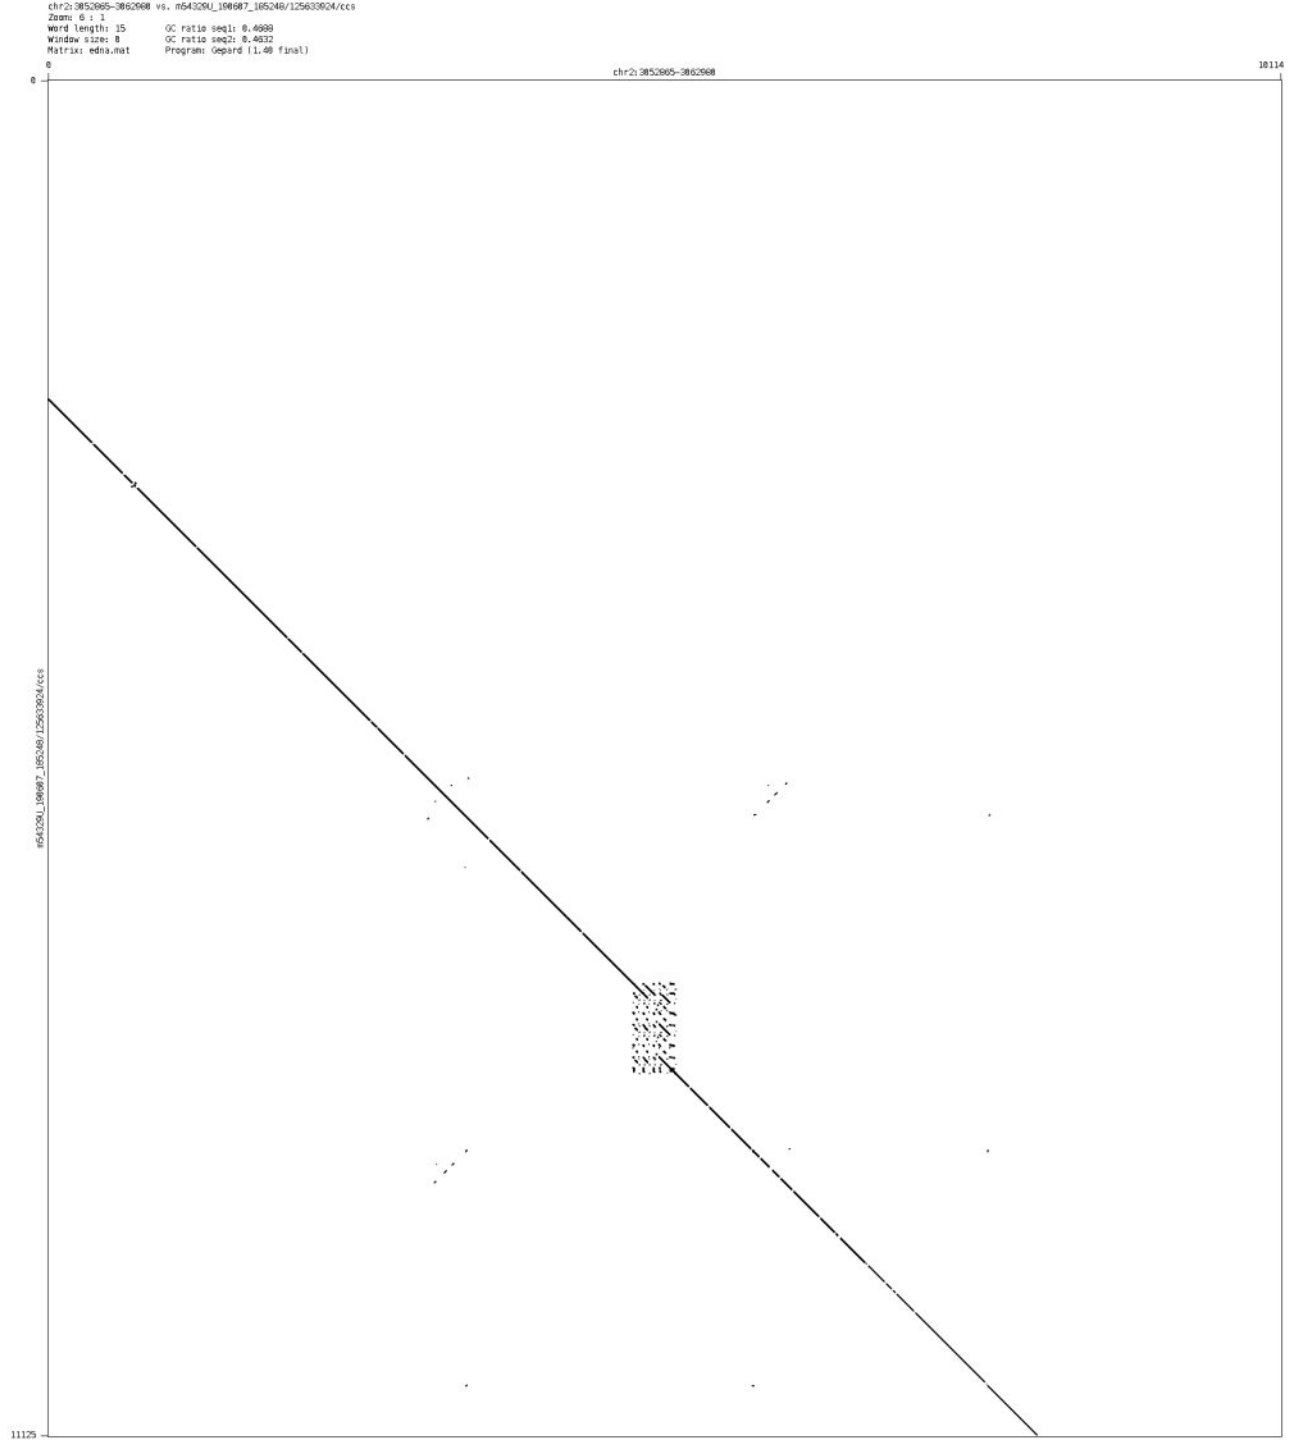

➤ chr2\_4974106\_4974189

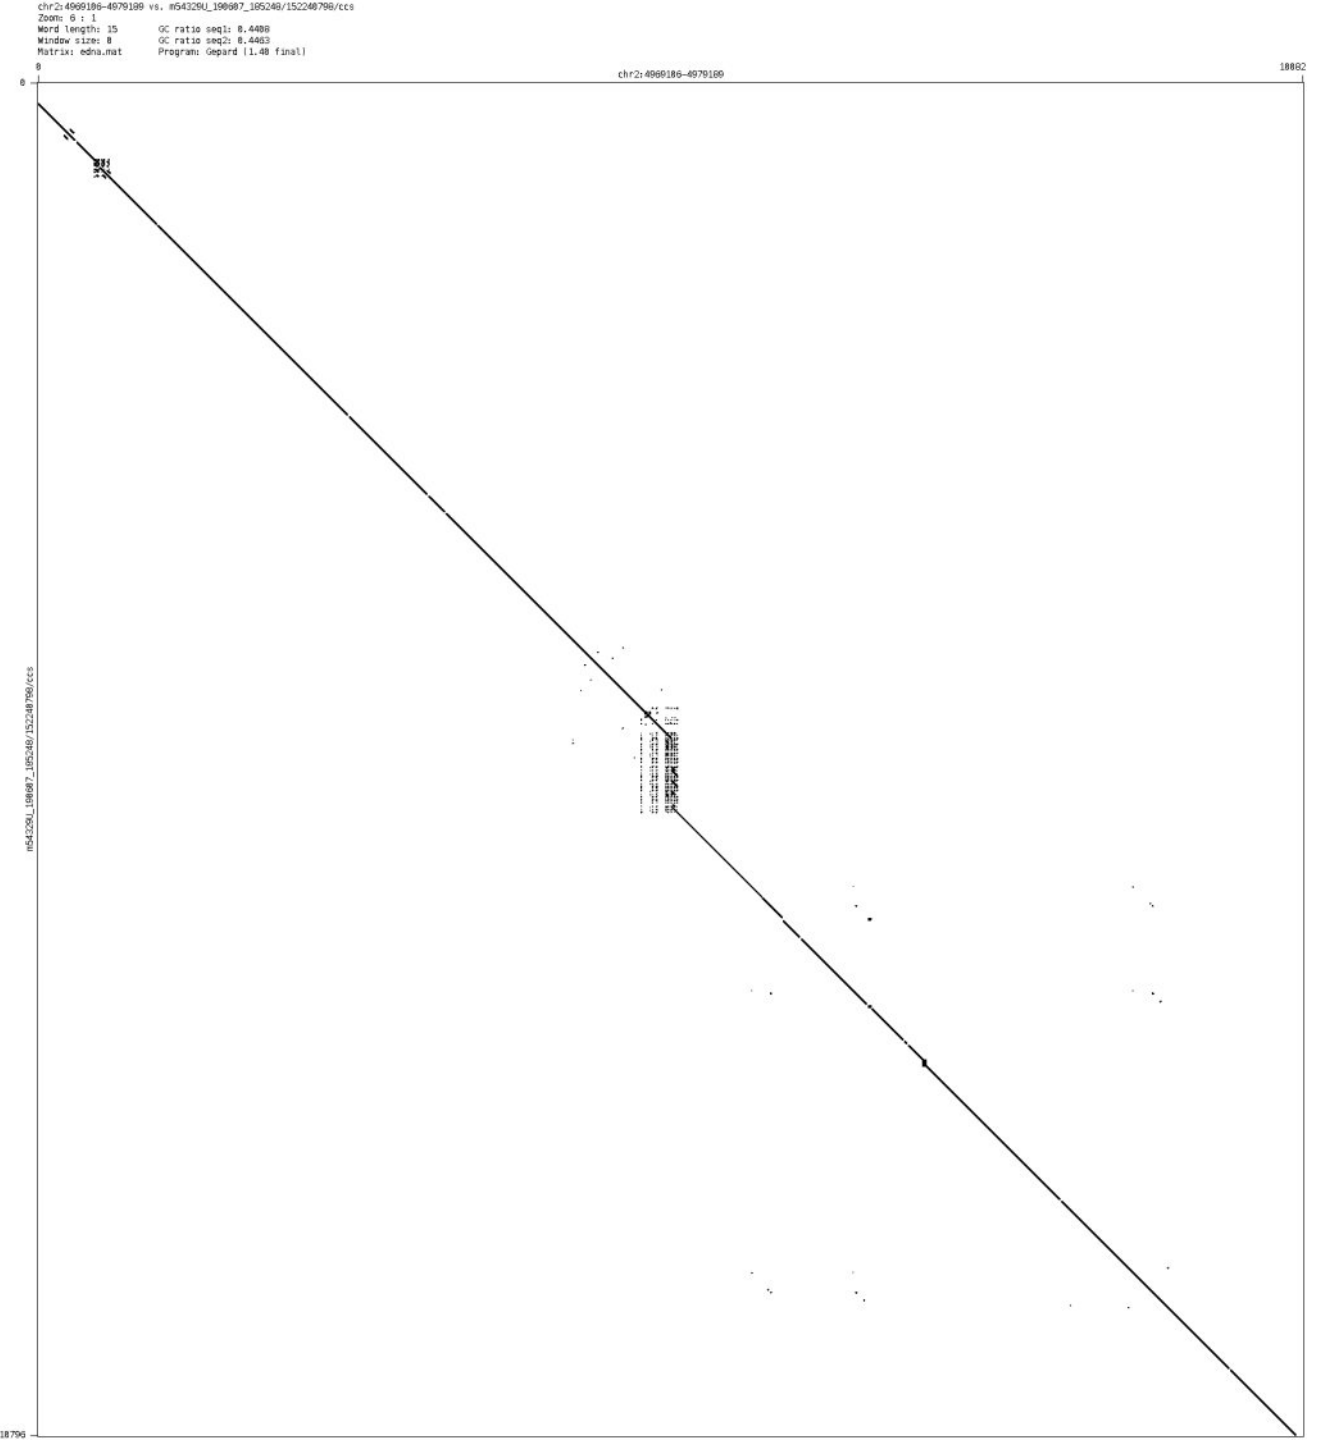

➤ chr2\_10011727\_10015474

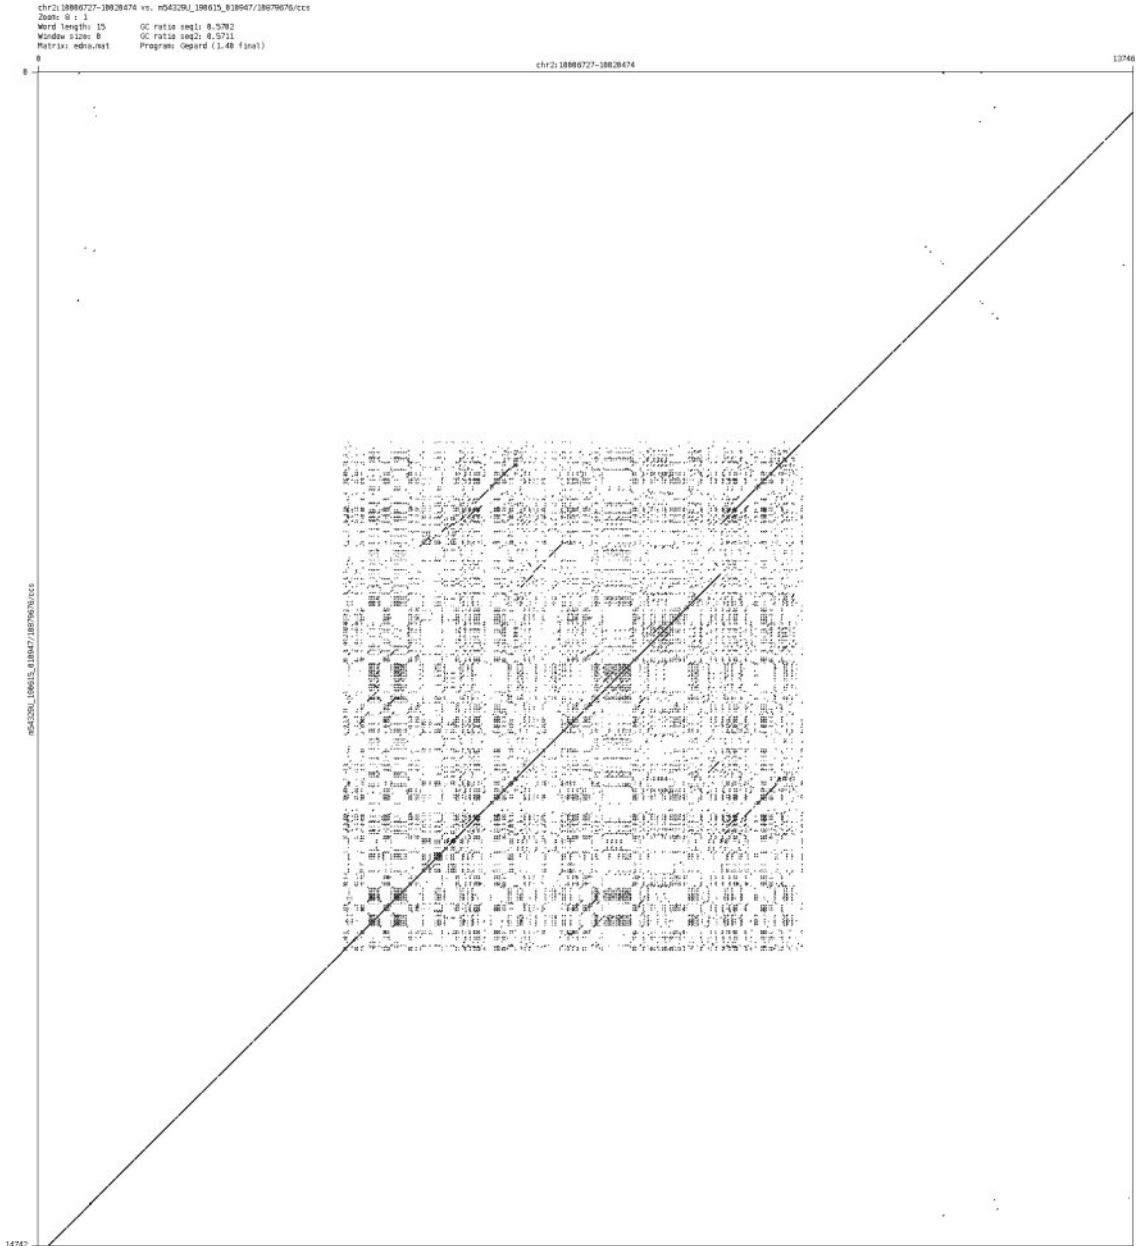

➤ chr2\_10399253\_10399369

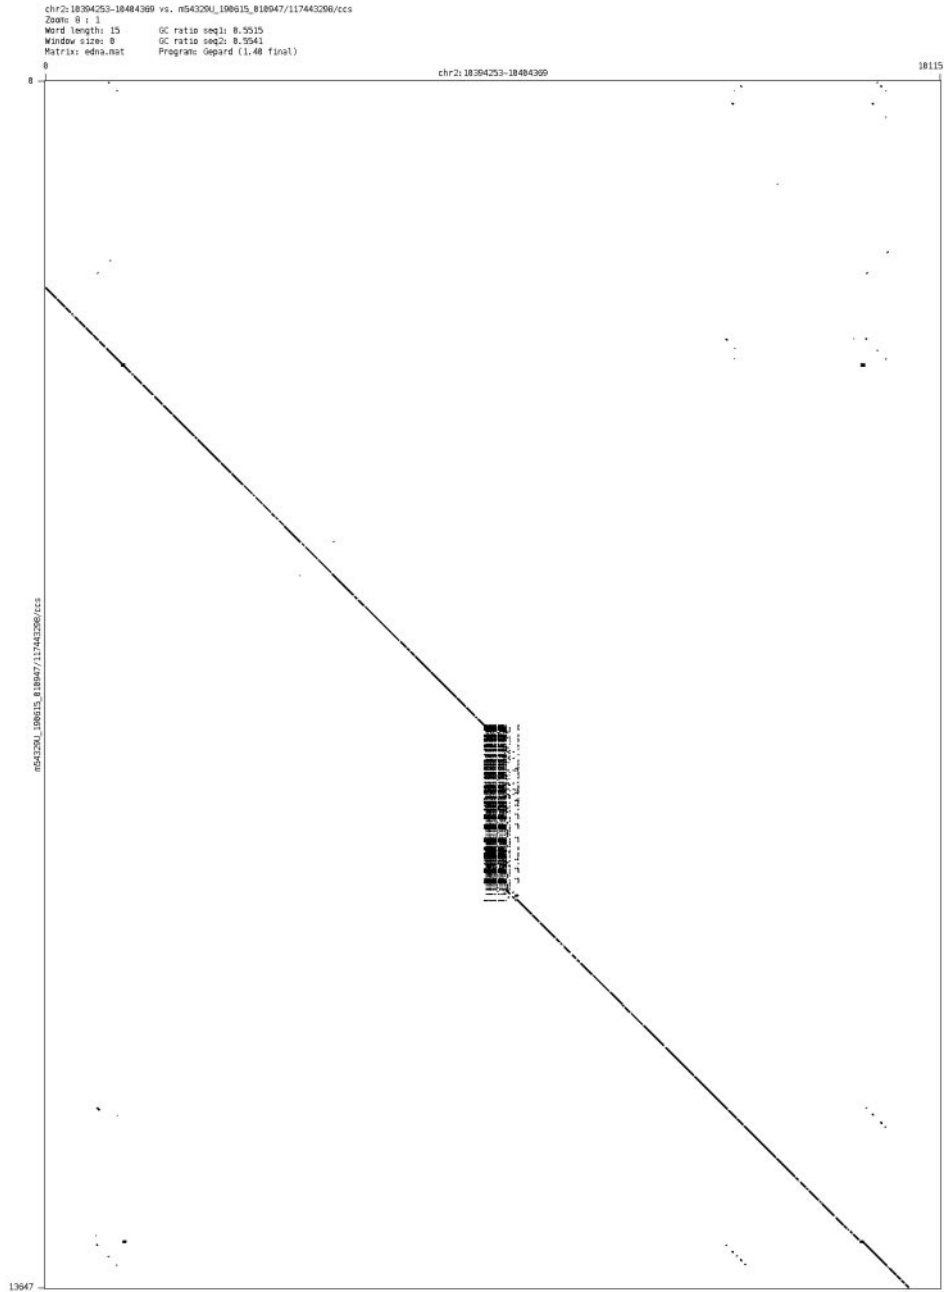



➤ chr2\_11113534\_11113628

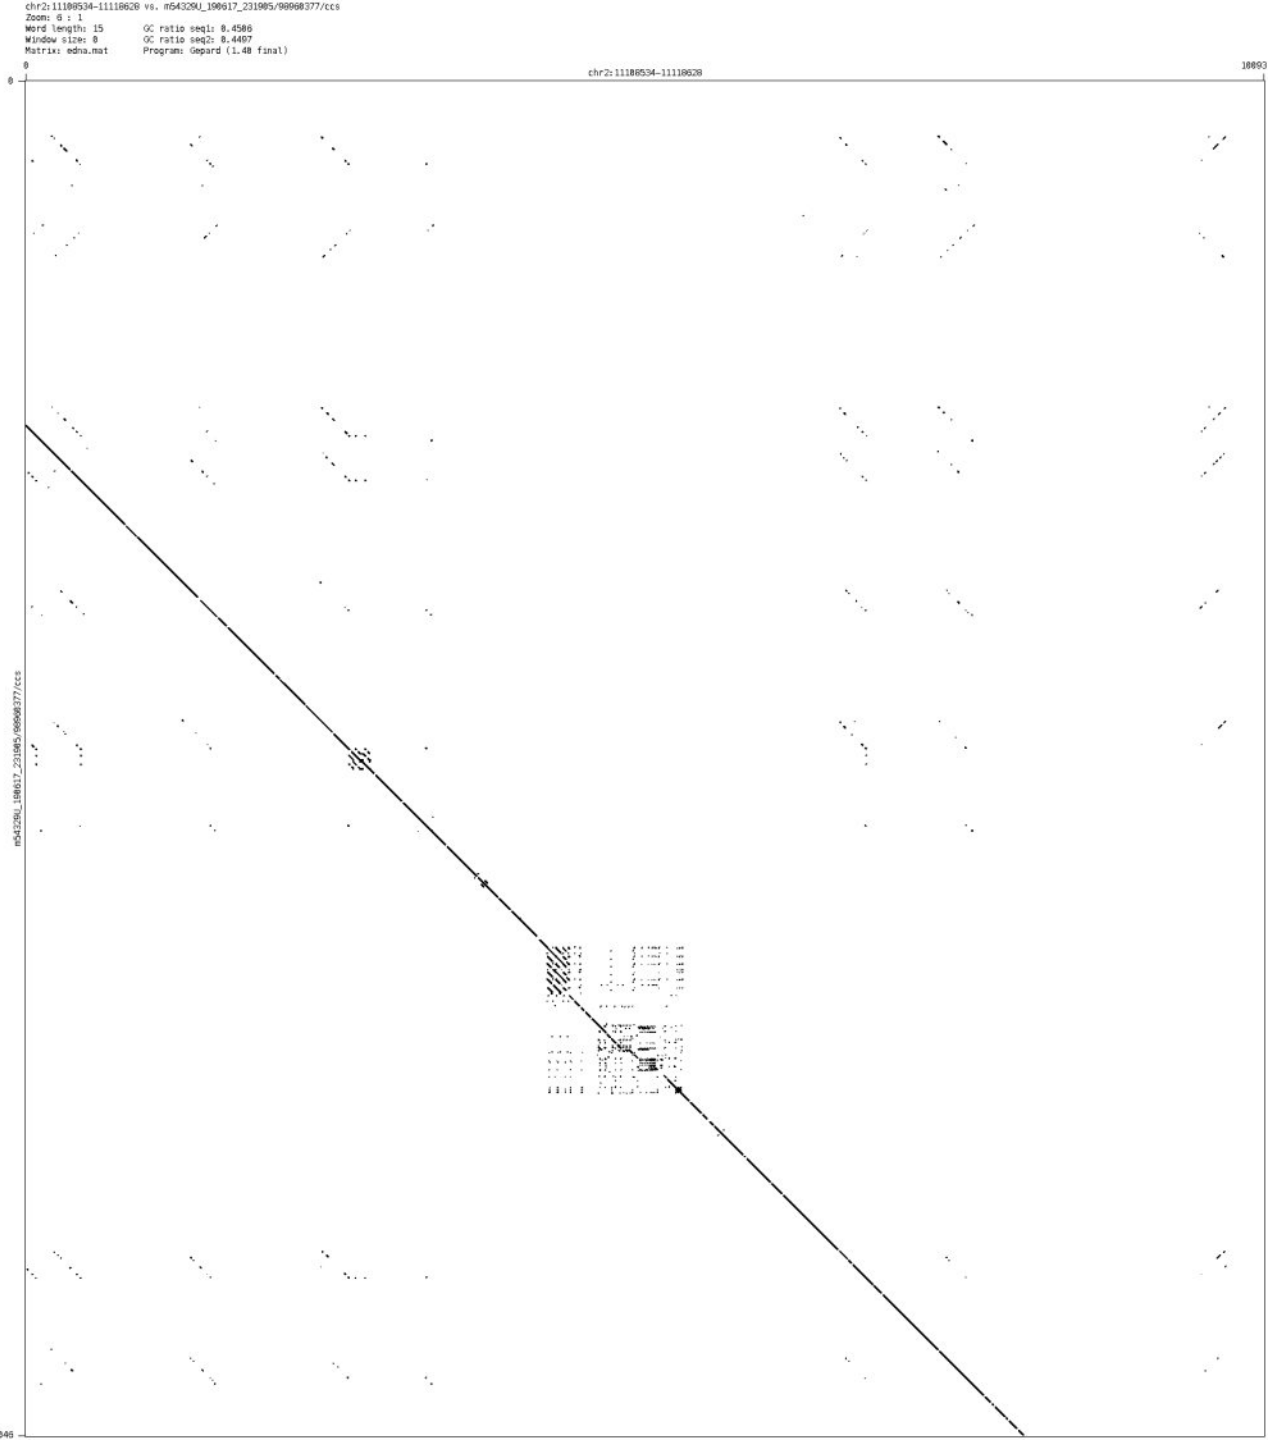

➤ chr2\_13288455\_13288641

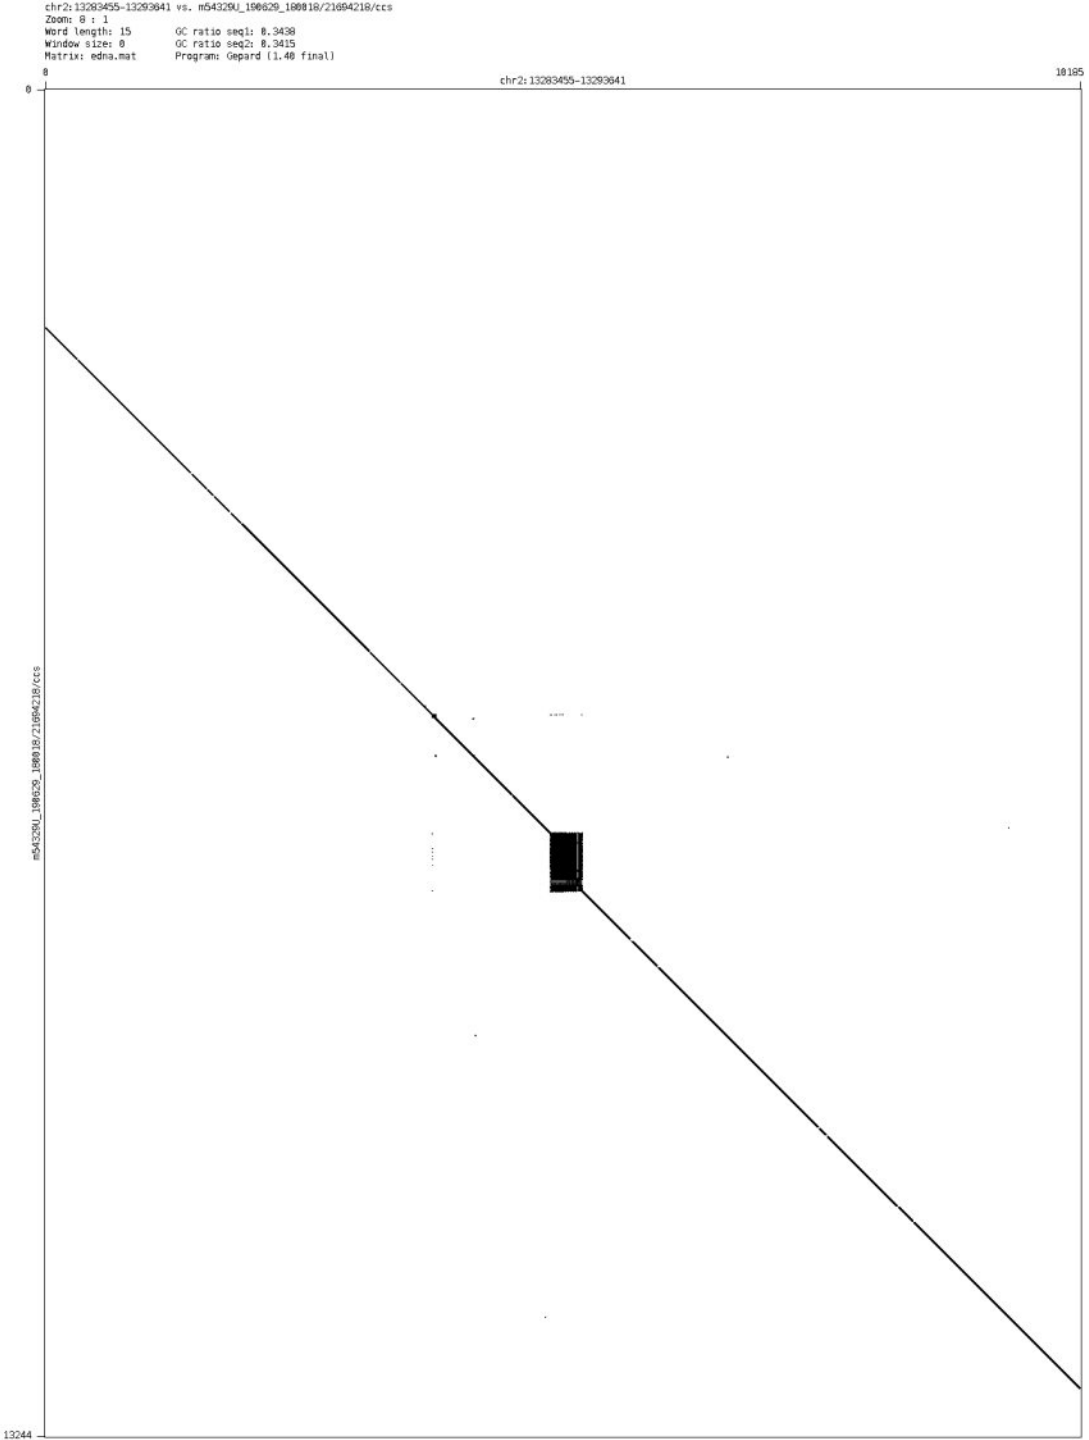

➤ chr2\_16224687\_16226666

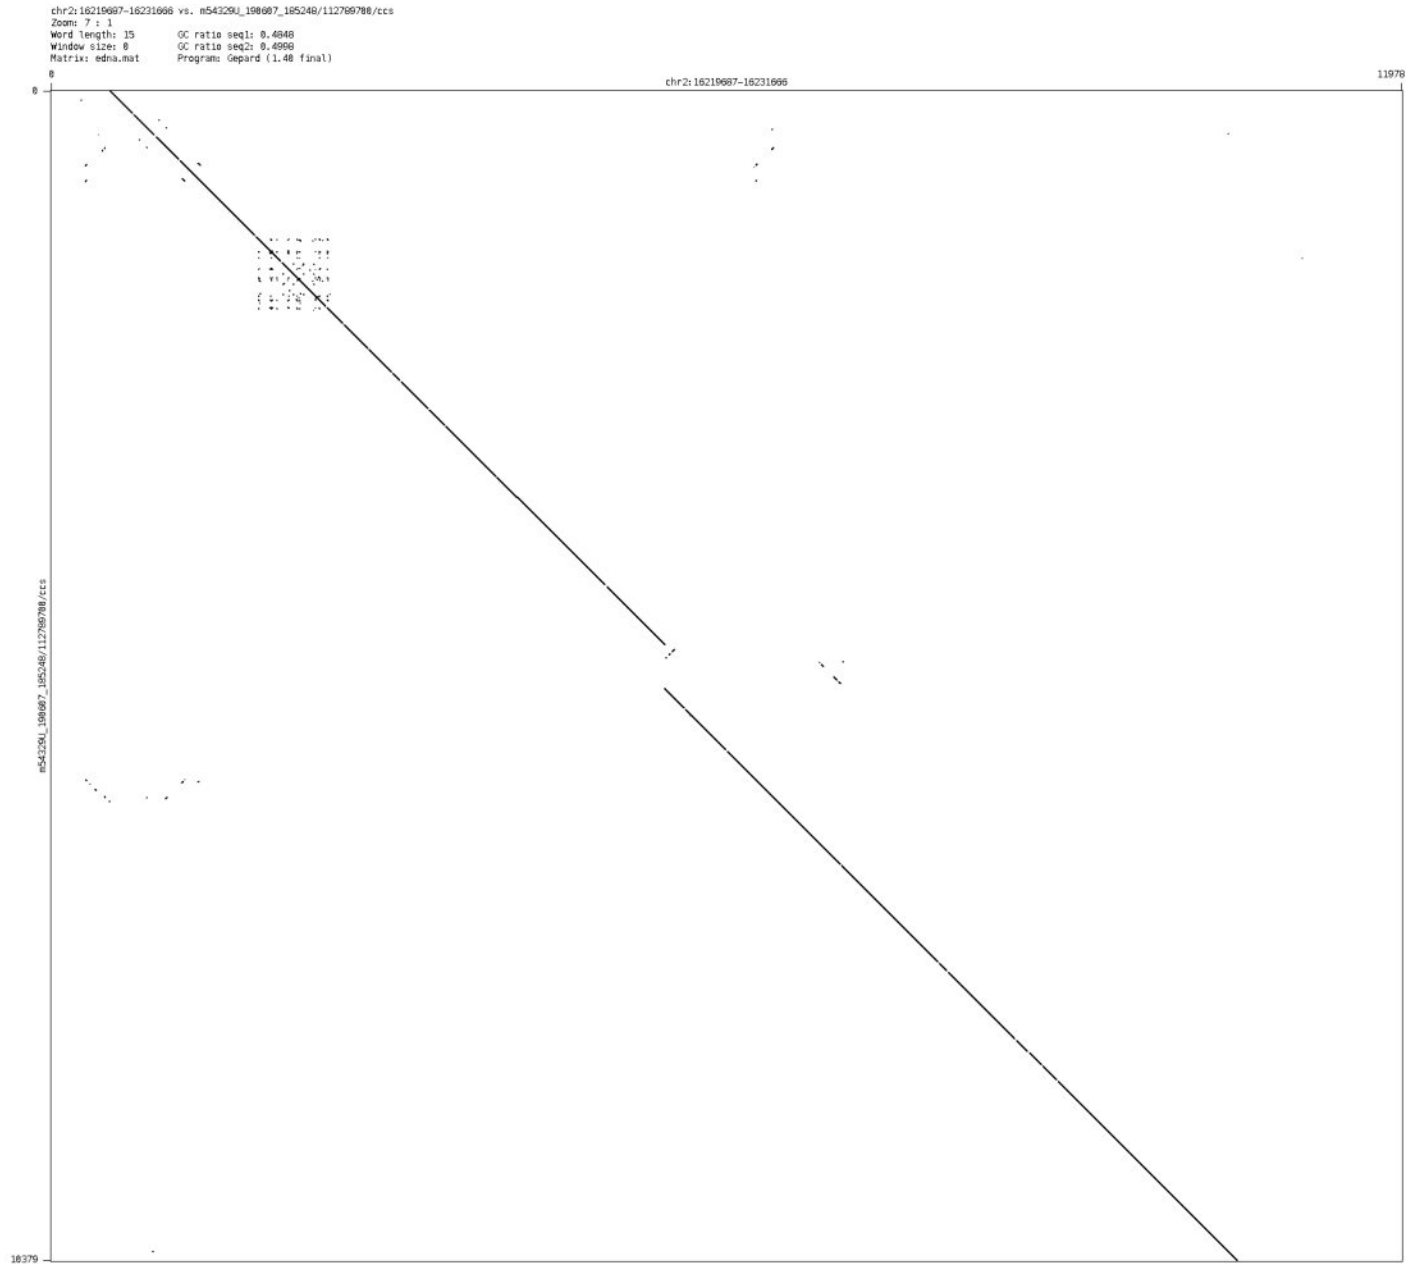

➤ chr2\_36184130\_36184311

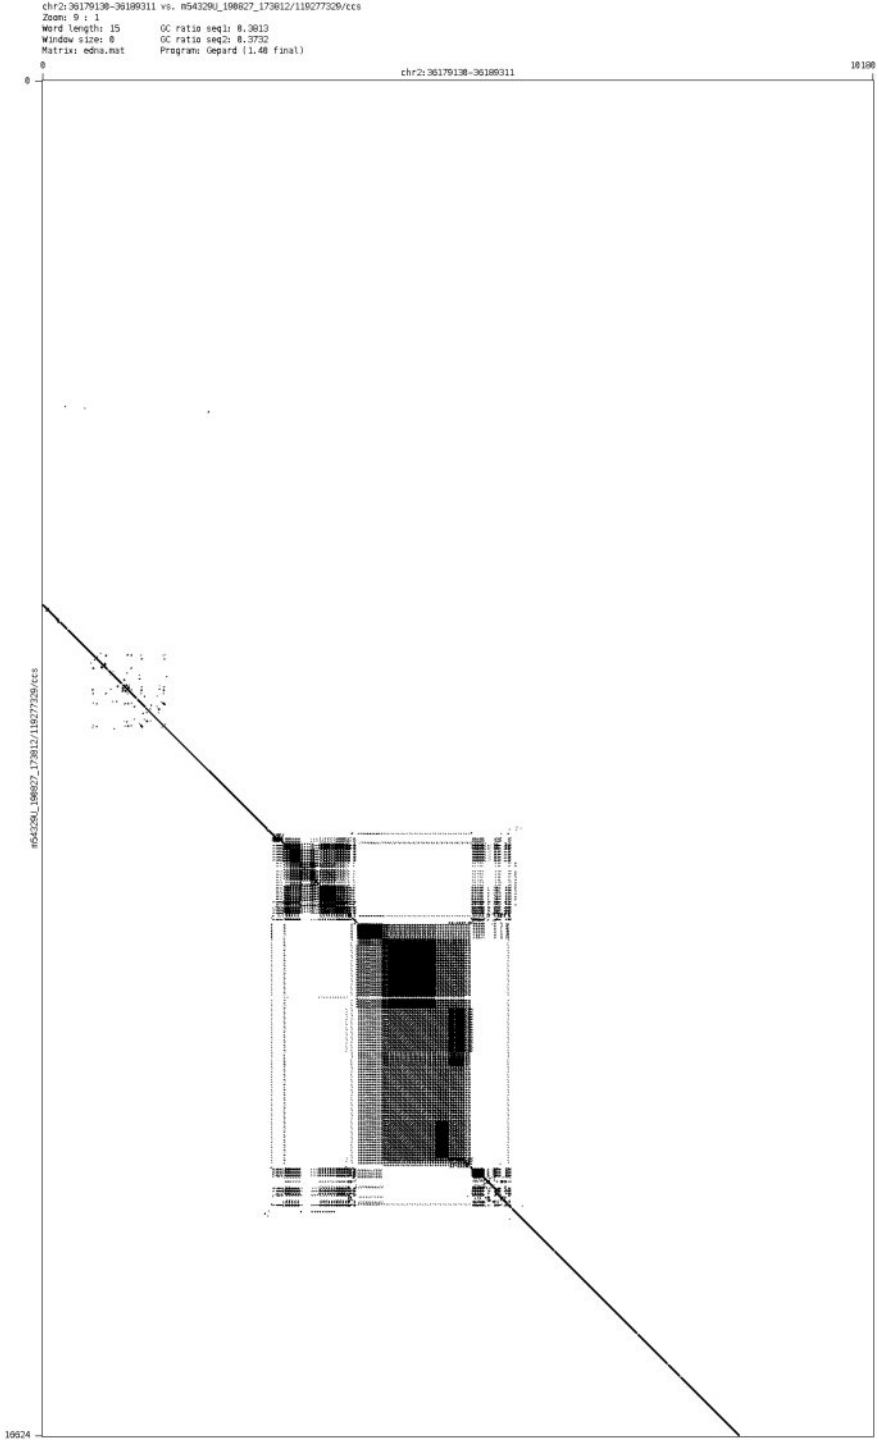

➤ chr2\_60467724\_60468110

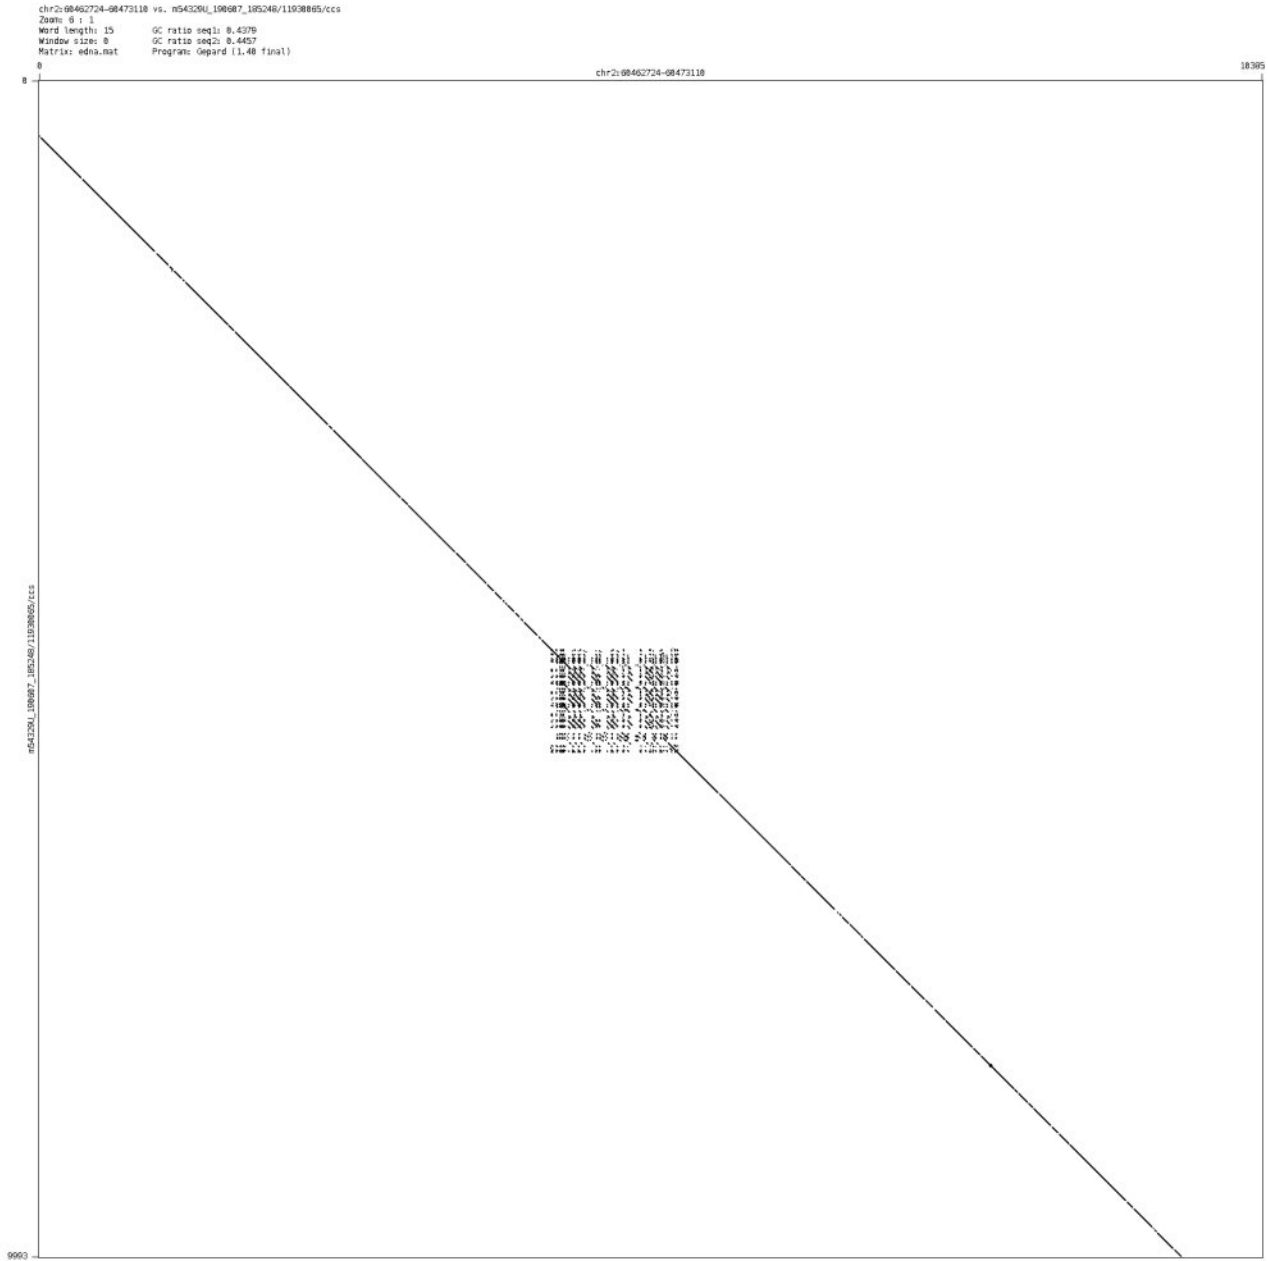

➤ chr2\_61473303\_61476318

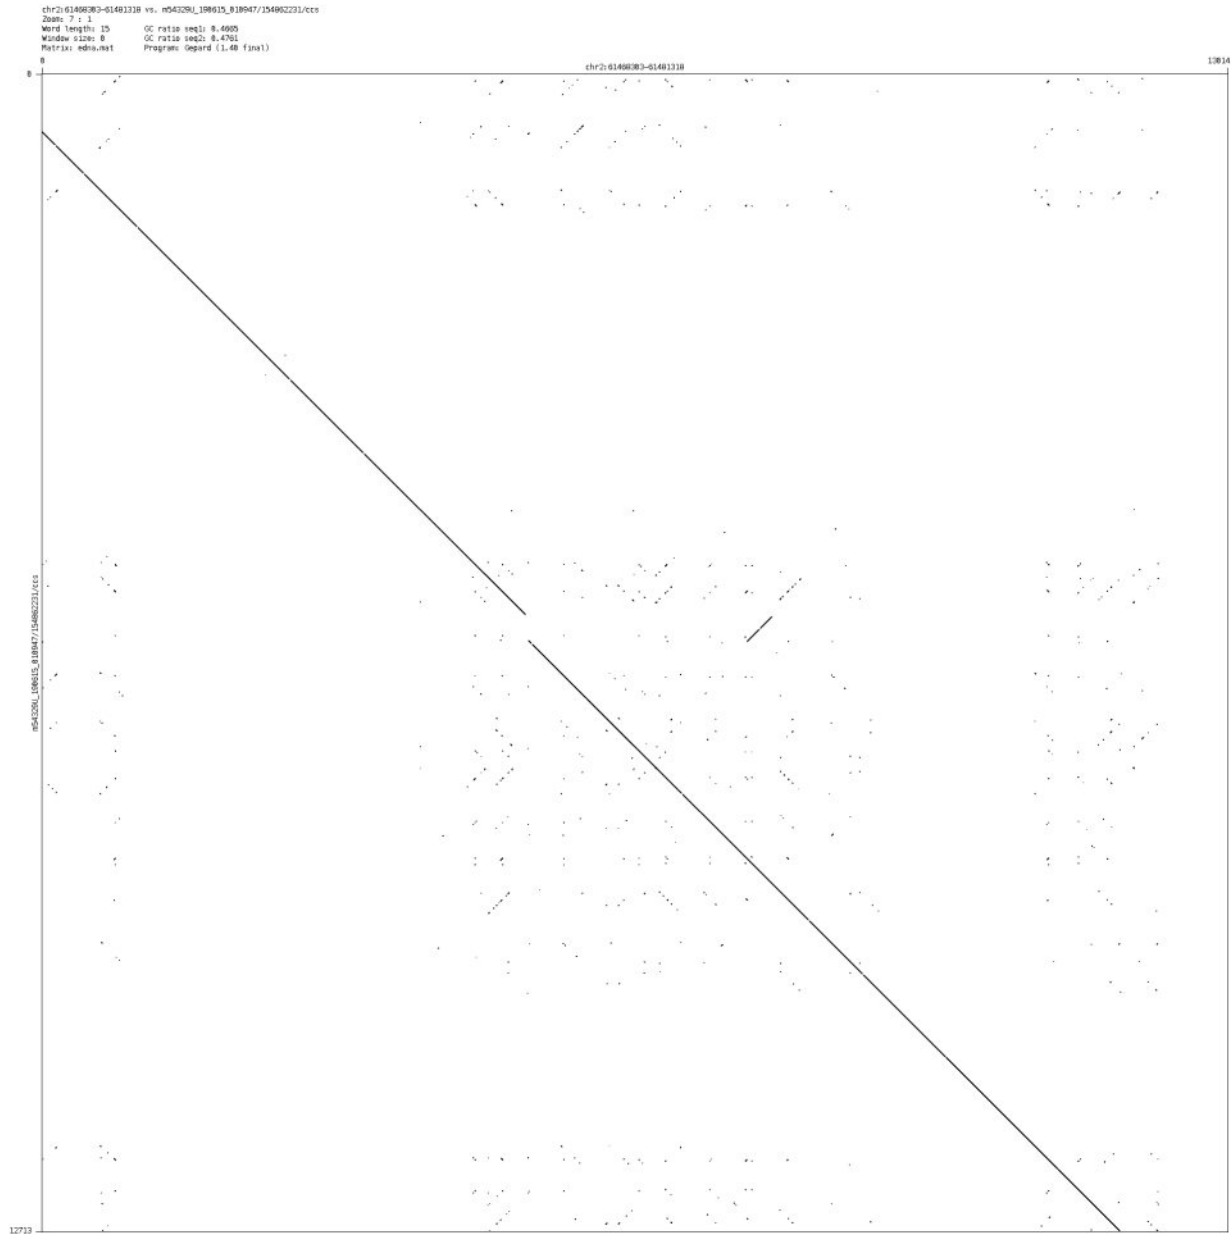

➤ chr2\_64376016\_64376165

chr2:64371816-64381165 vs. n54320U\_190907\_185248/48499959/ccc  
Zoom: 0 : 1  
Word length: 15 GC ratio seq1: 0.4556  
Window size: 0 GC ratio seq2: 0.4718  
Matrix: edna.mat Program: oepard (1.48 final)

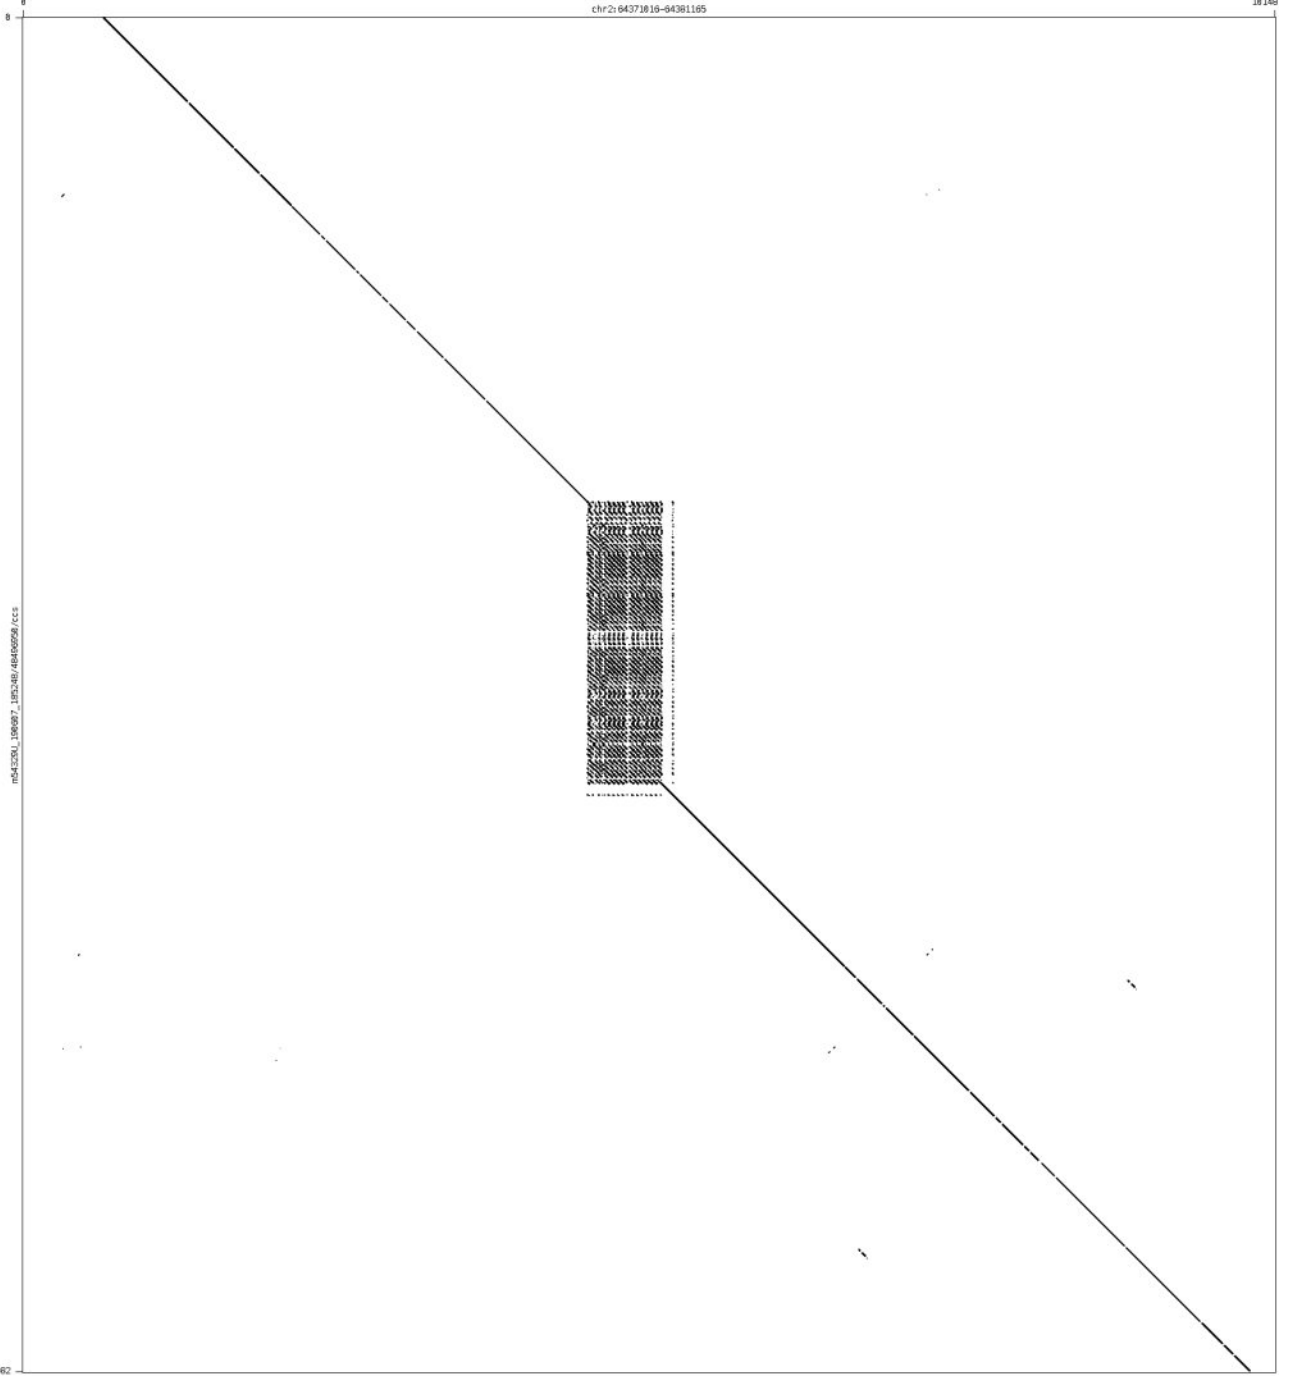

➤ chr2\_65600866\_65601053

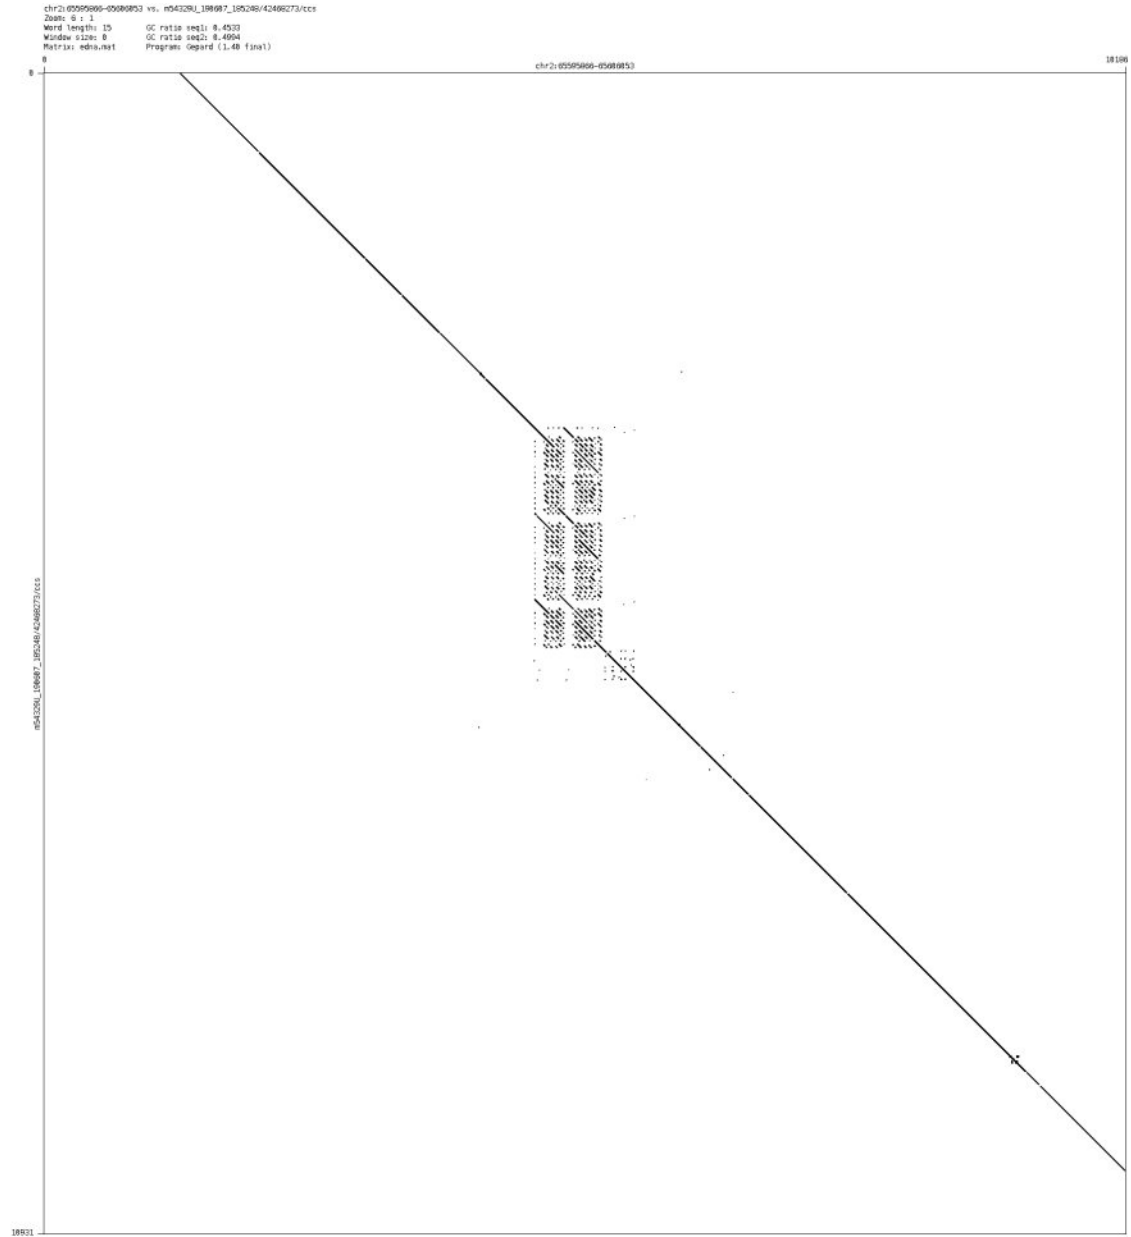



➤ chr2\_71618111\_71618577

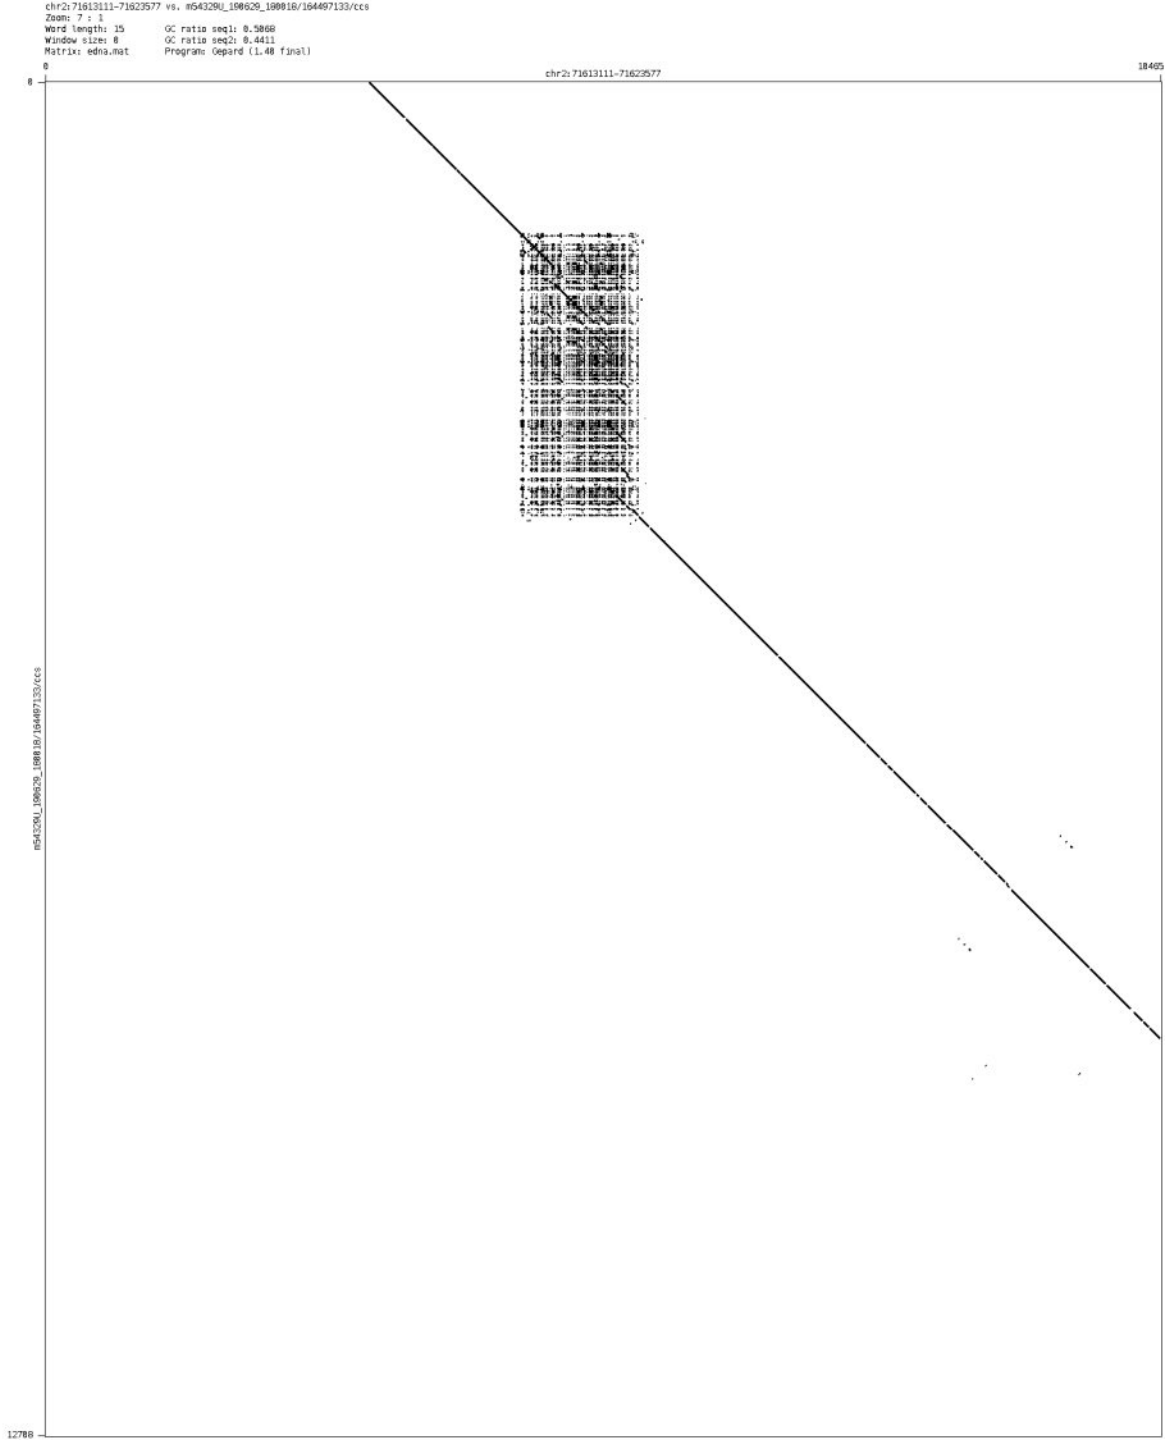

➤ chr2\_83342525\_83342578

chr2:8337525-83347578 vs. m54329U\_196617\_231985/132318953/ccs  
Zoom: 8 : 1  
Word length: 15 GC ratio seq1: 8.2728  
Window size: 0 GC ratio seq2: 8.2694  
Matrix: edna.mat Program: Gepard (1.48 final)

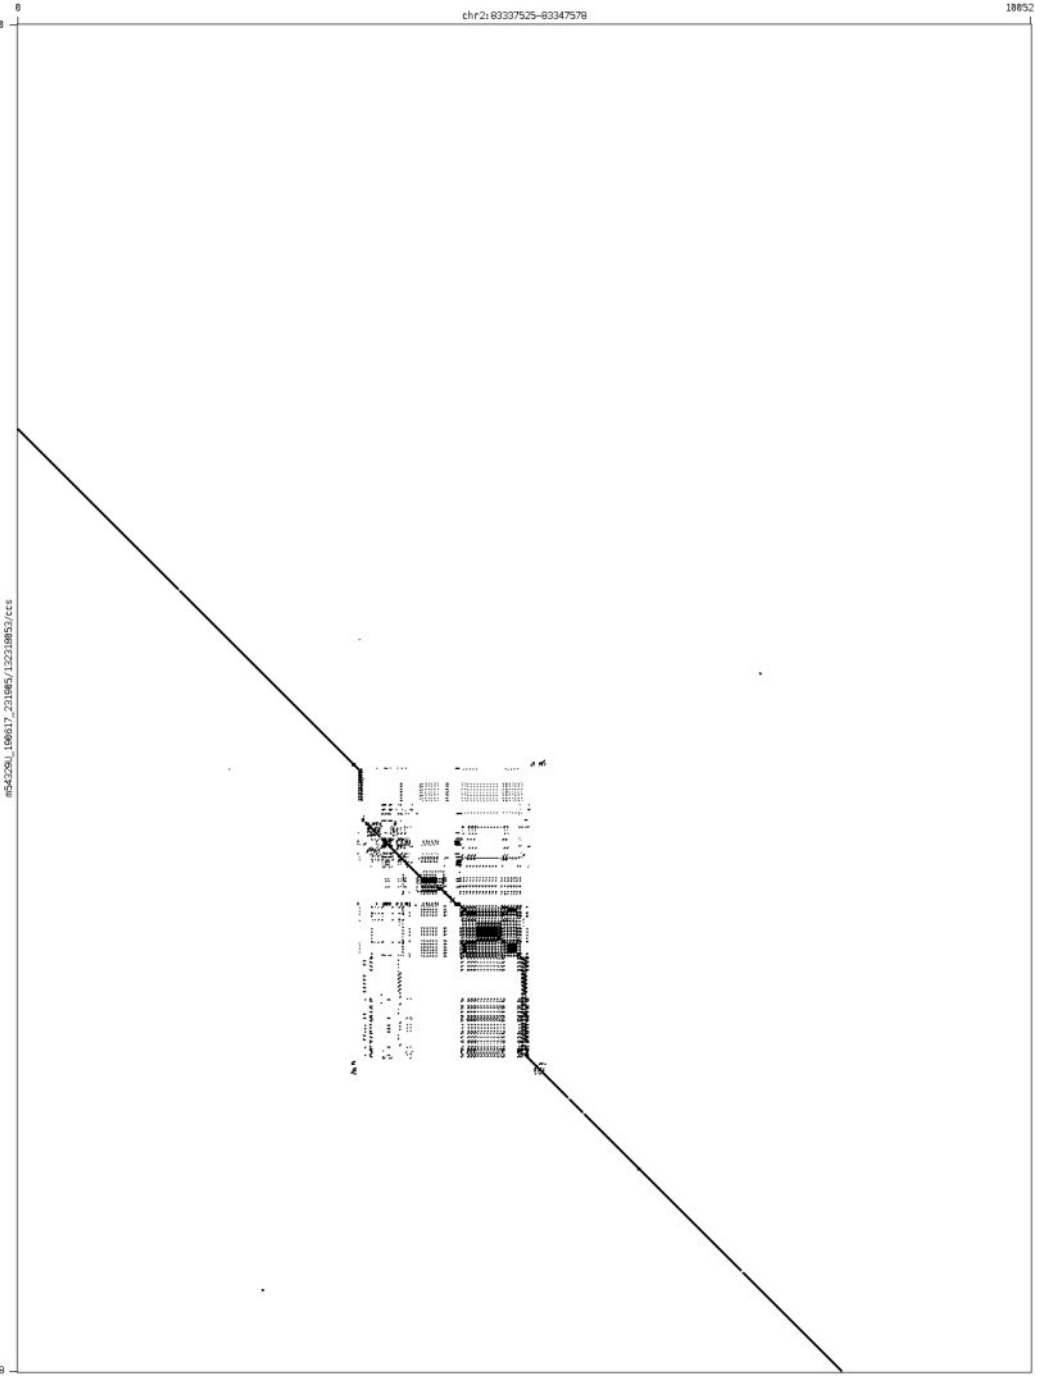

➤ chr2\_95544970\_95546071

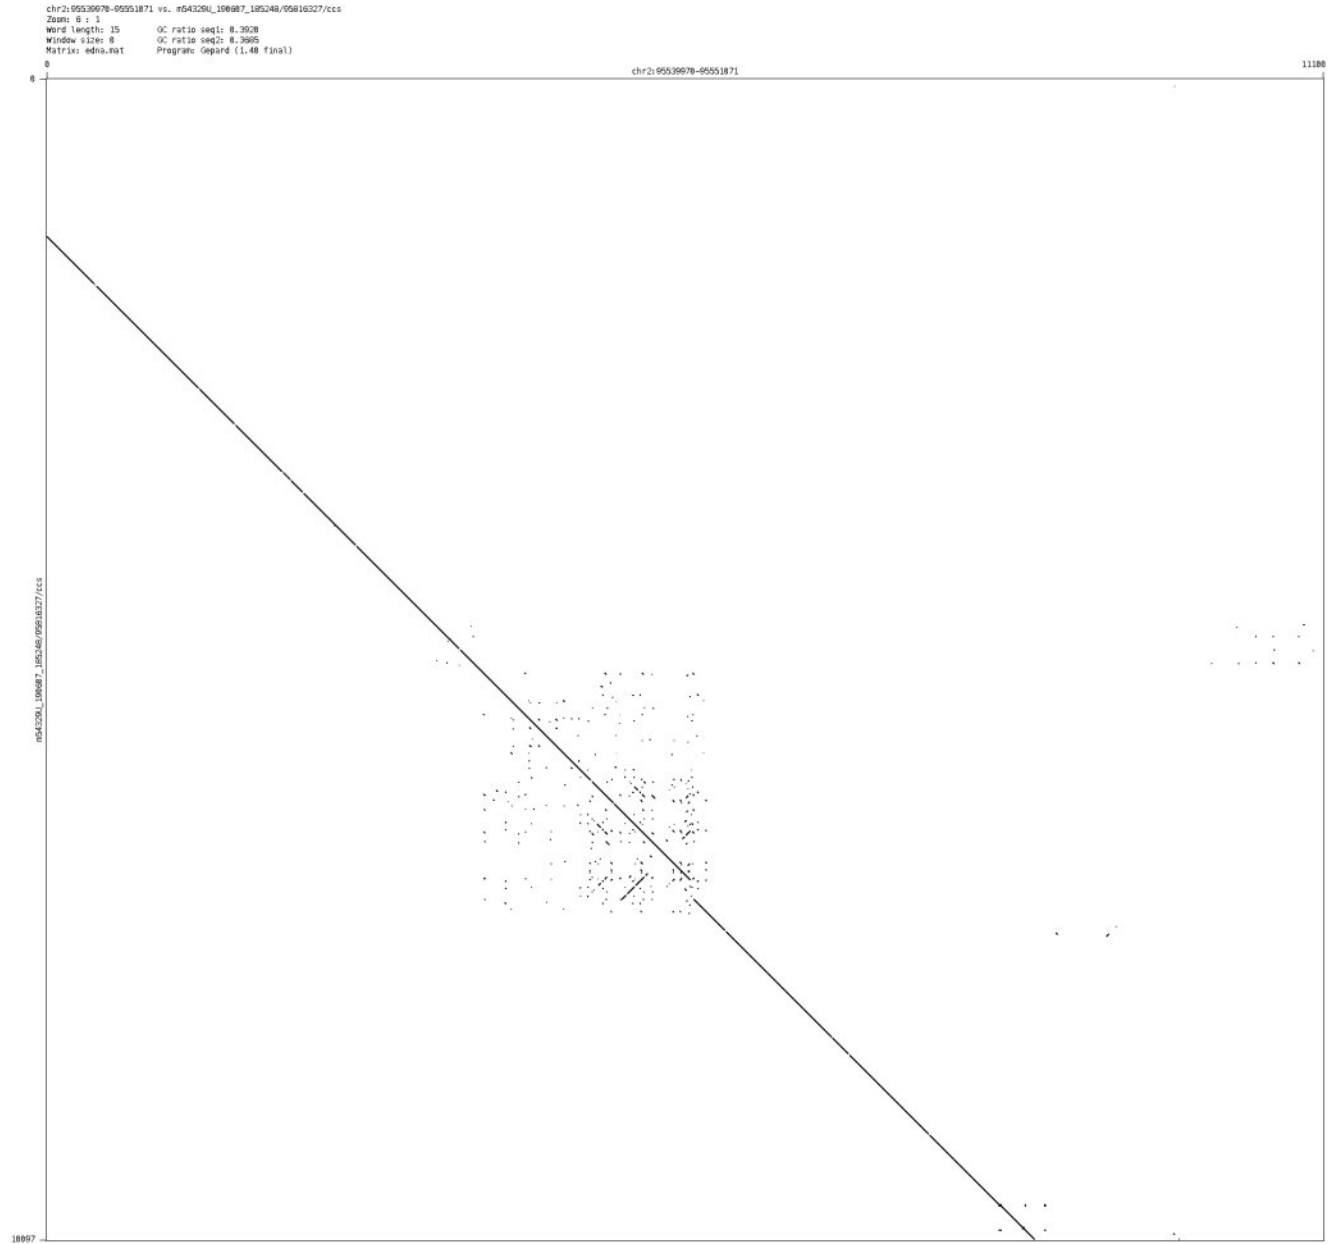

➤ chr2\_116216764\_116224735

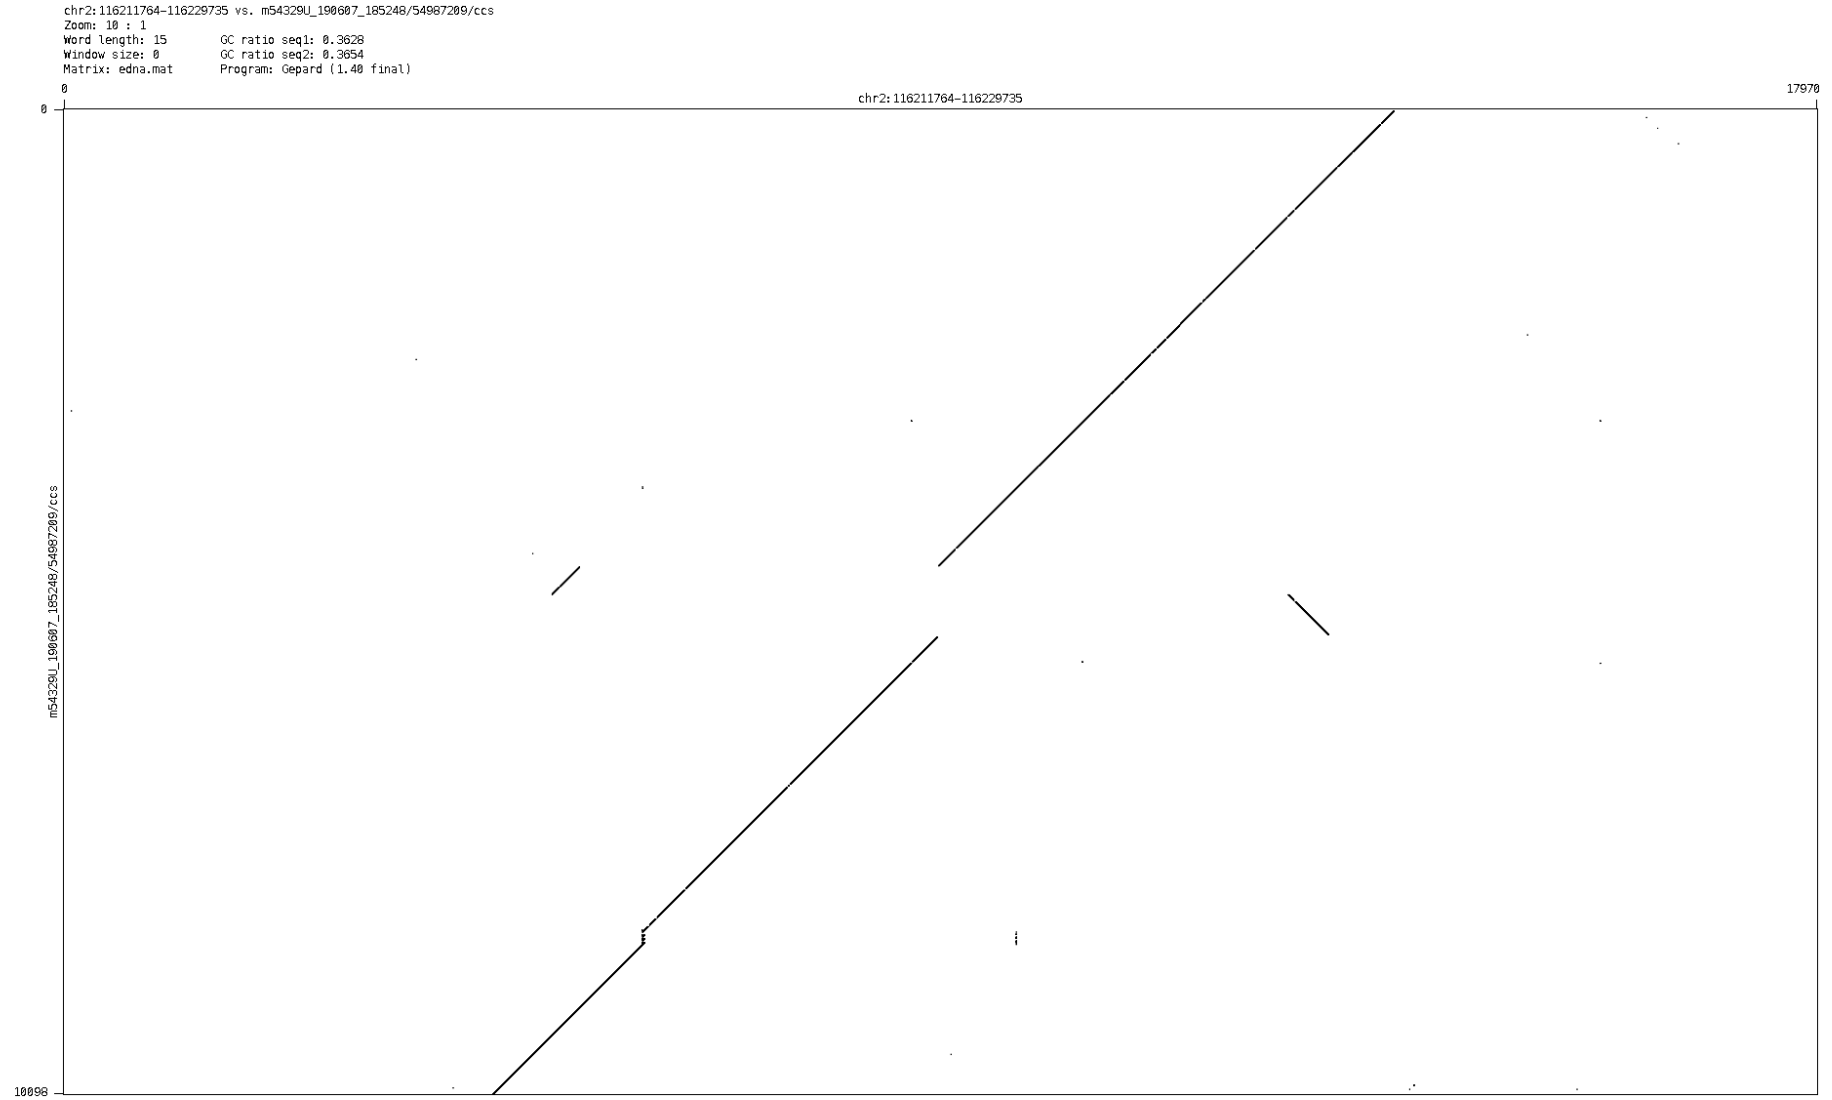

➤ chr2\_119444283\_119445298

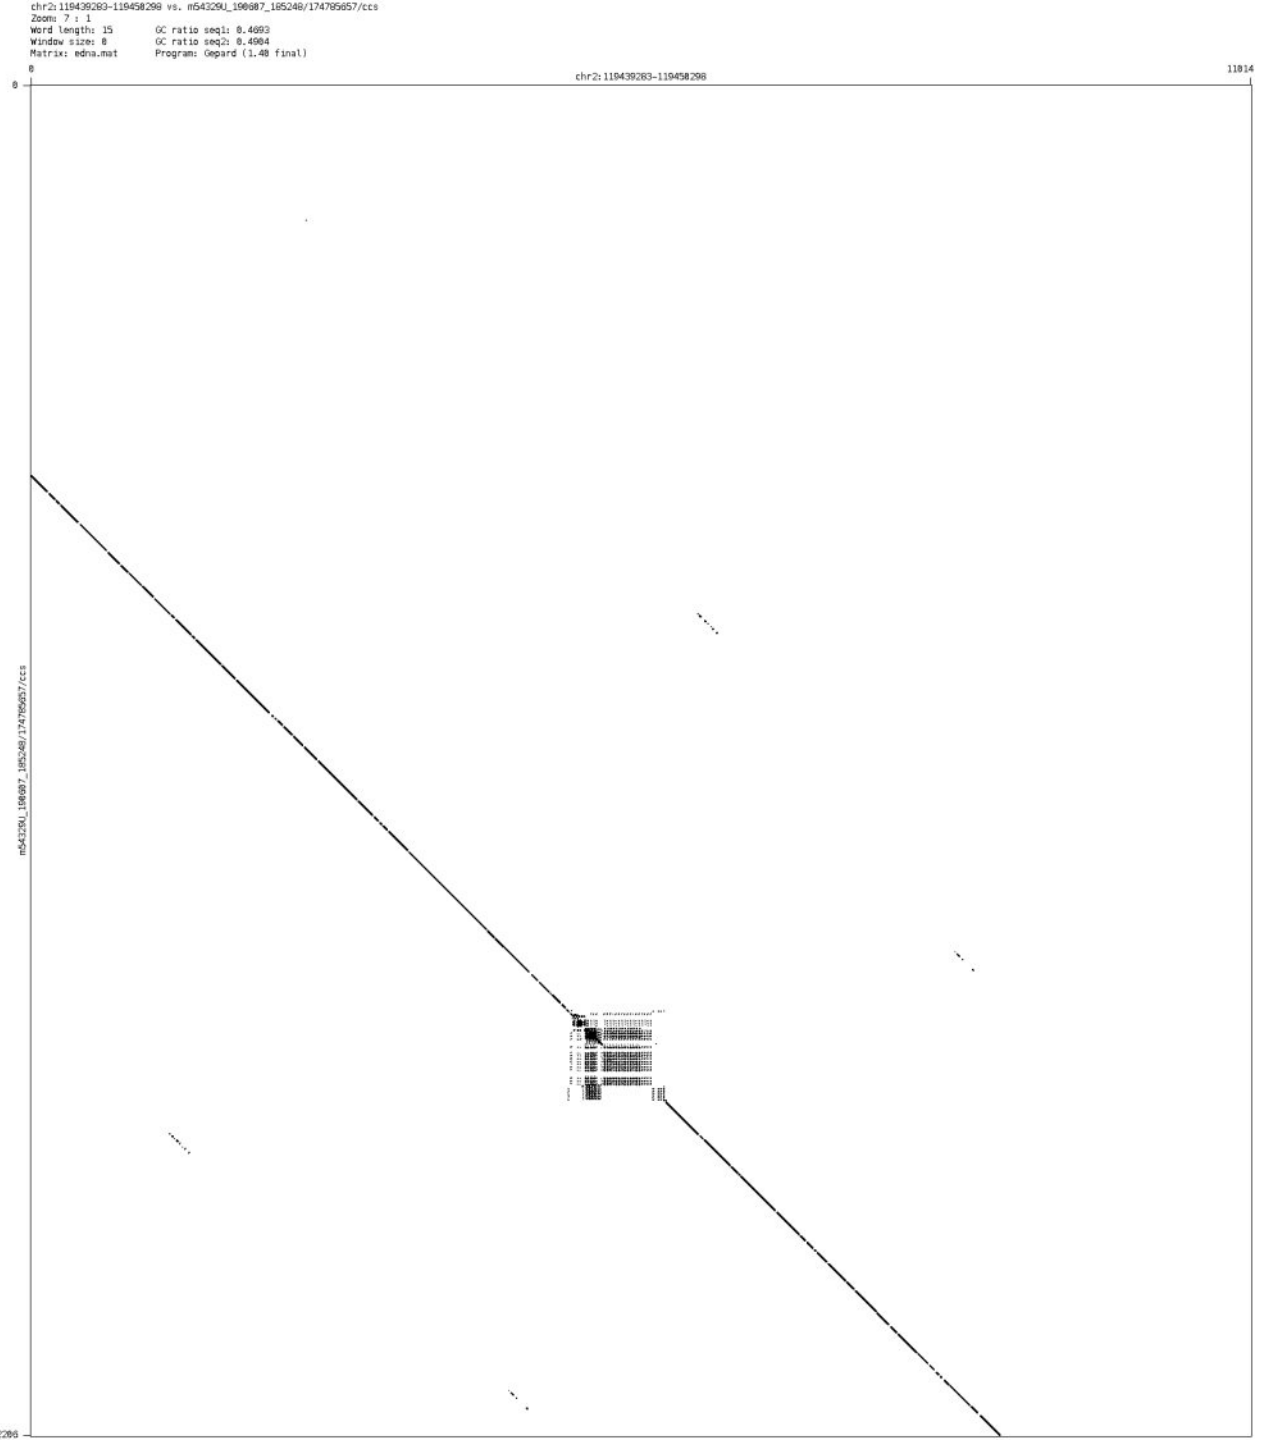

➤ chr2\_119659504\_119661322

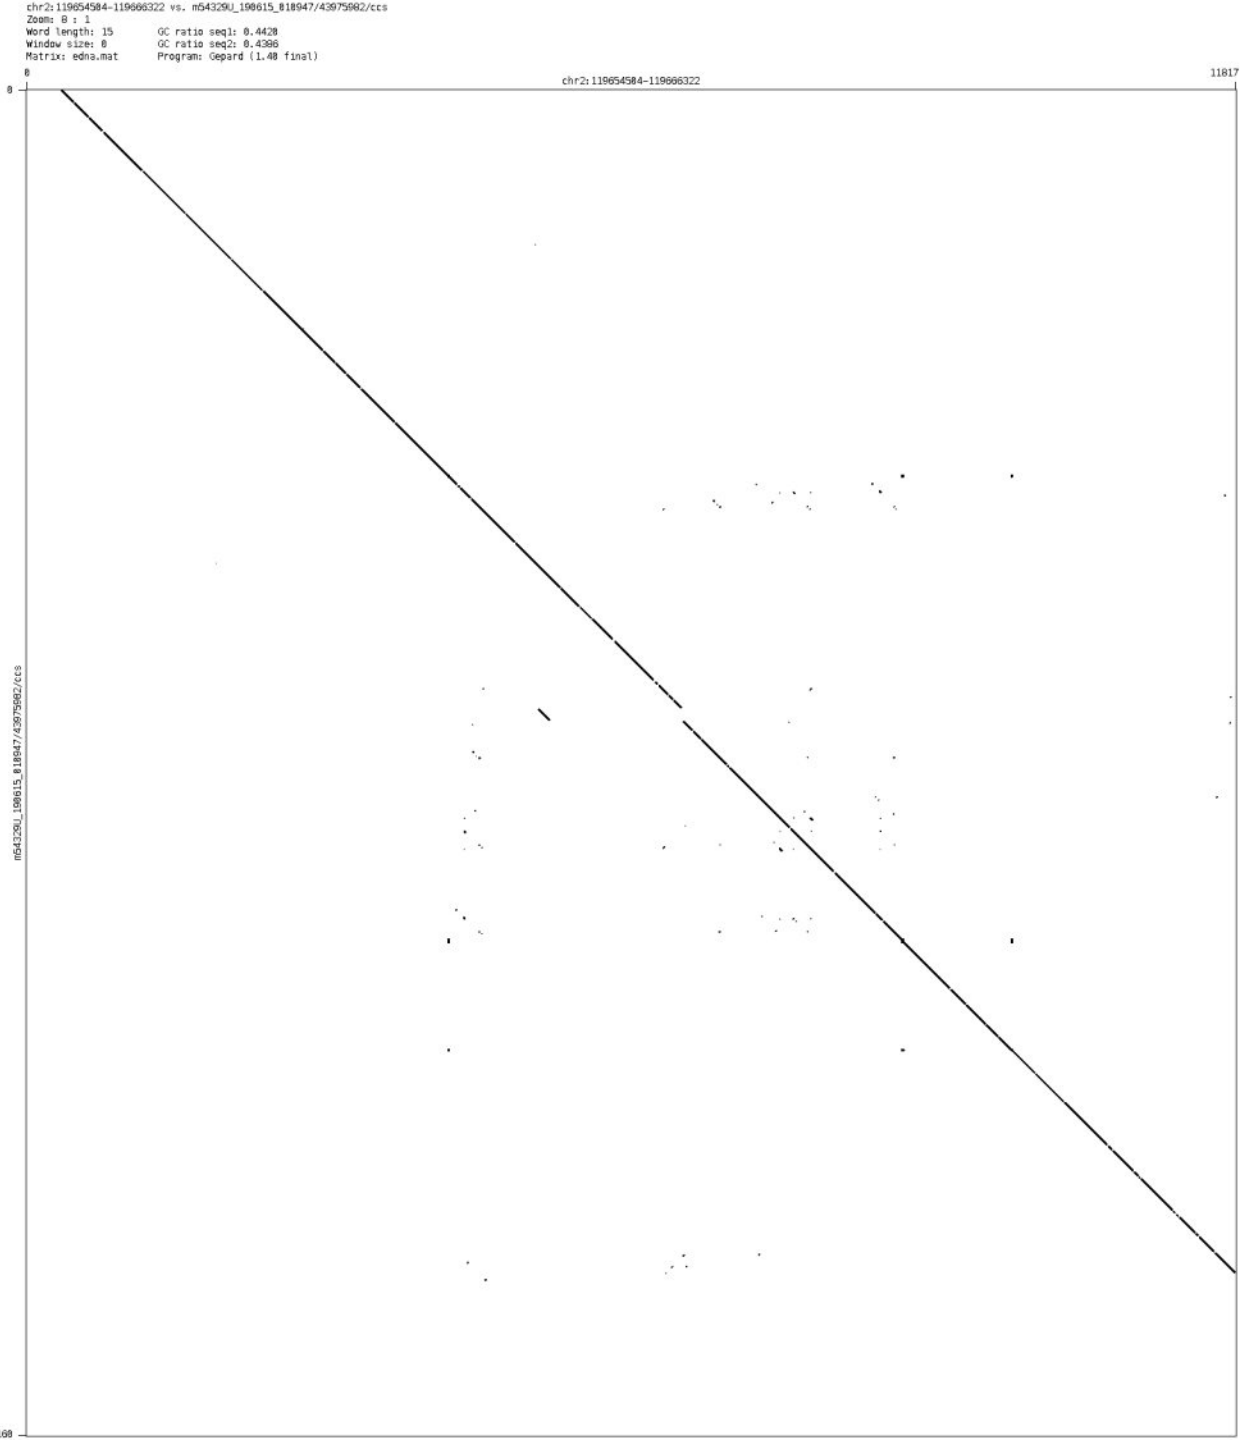

➤ chr2\_122612259\_122613019

chr2:122607259-122616819 vs. m54325U\_196987\_185248/183823867/ctc  
Zoom: 0 : 1  
Word length: 15 GC ratio seq1: 0.3577  
Window size: 8 GC ratio seq2: 0.3959  
Matrix: edna.mat Program: Oepard (1.48 final)

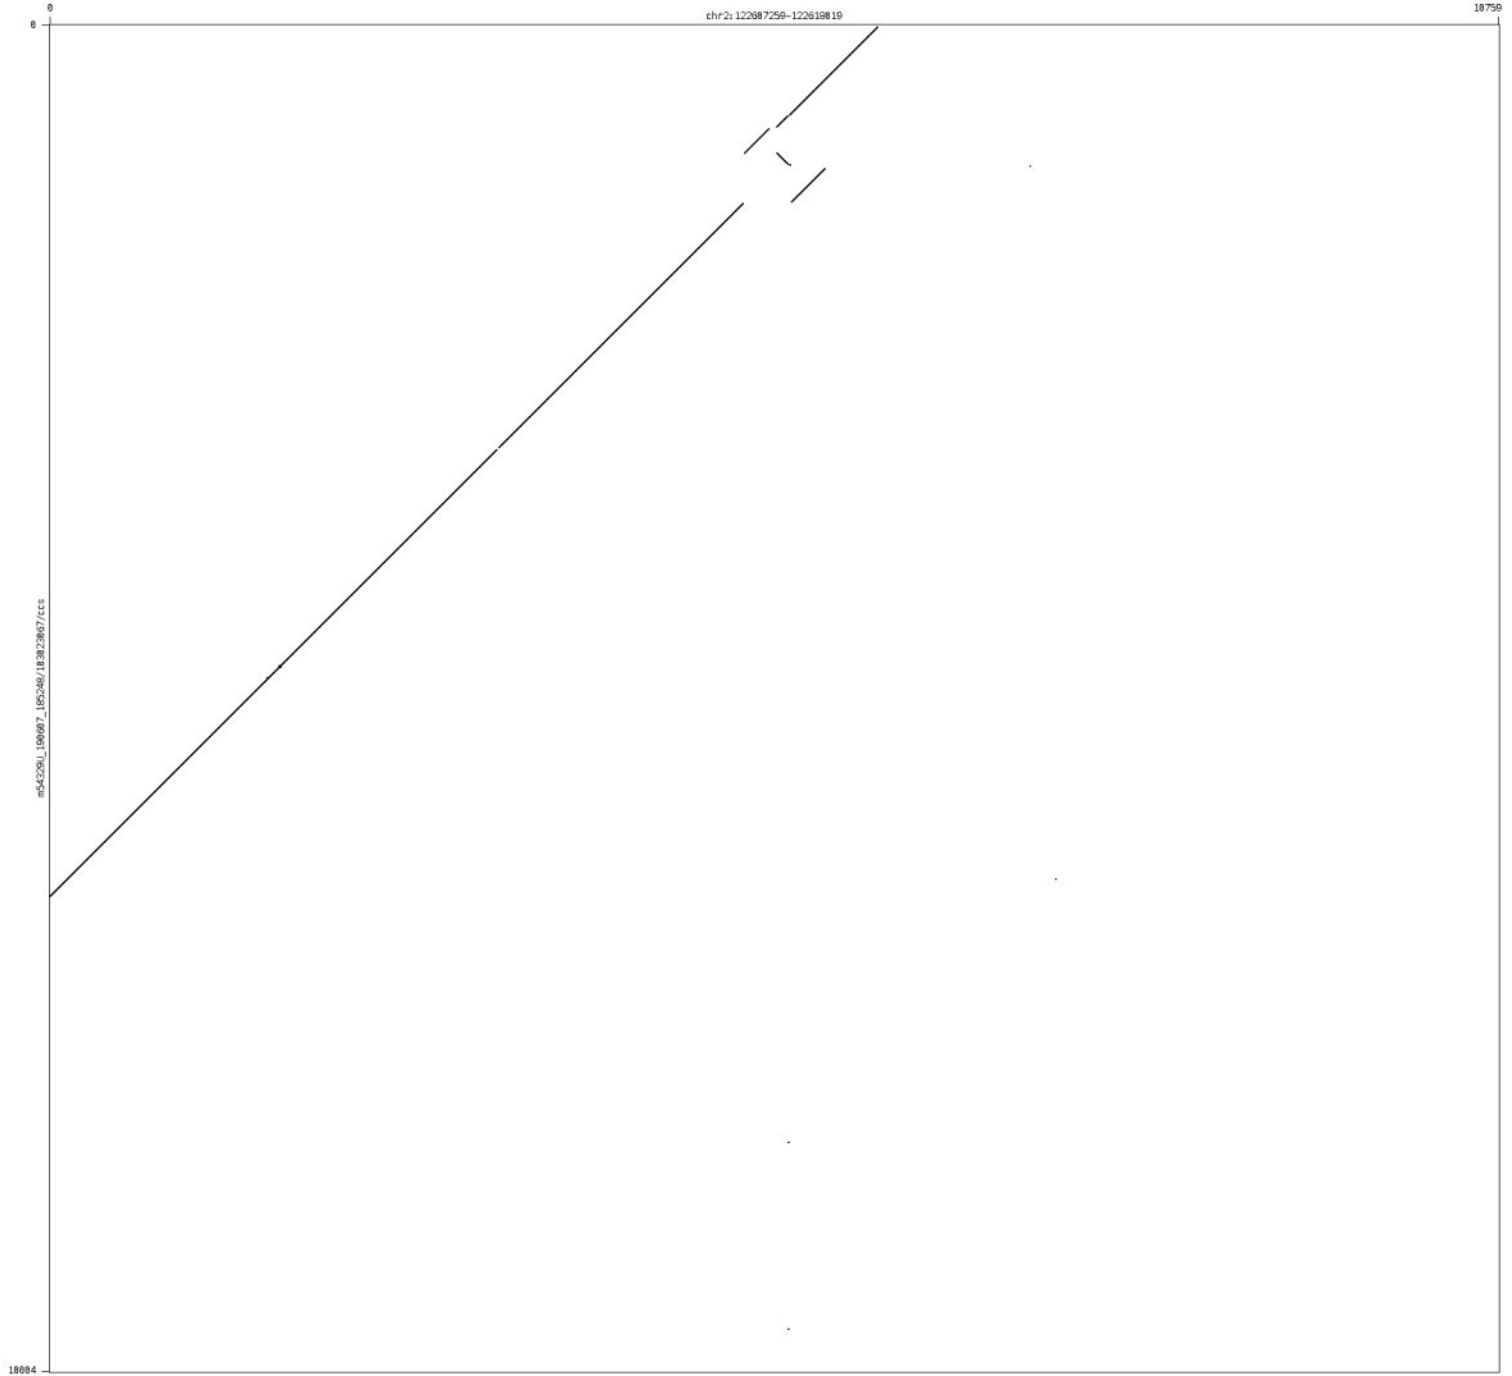

➤ chr2\_124293968\_124295664

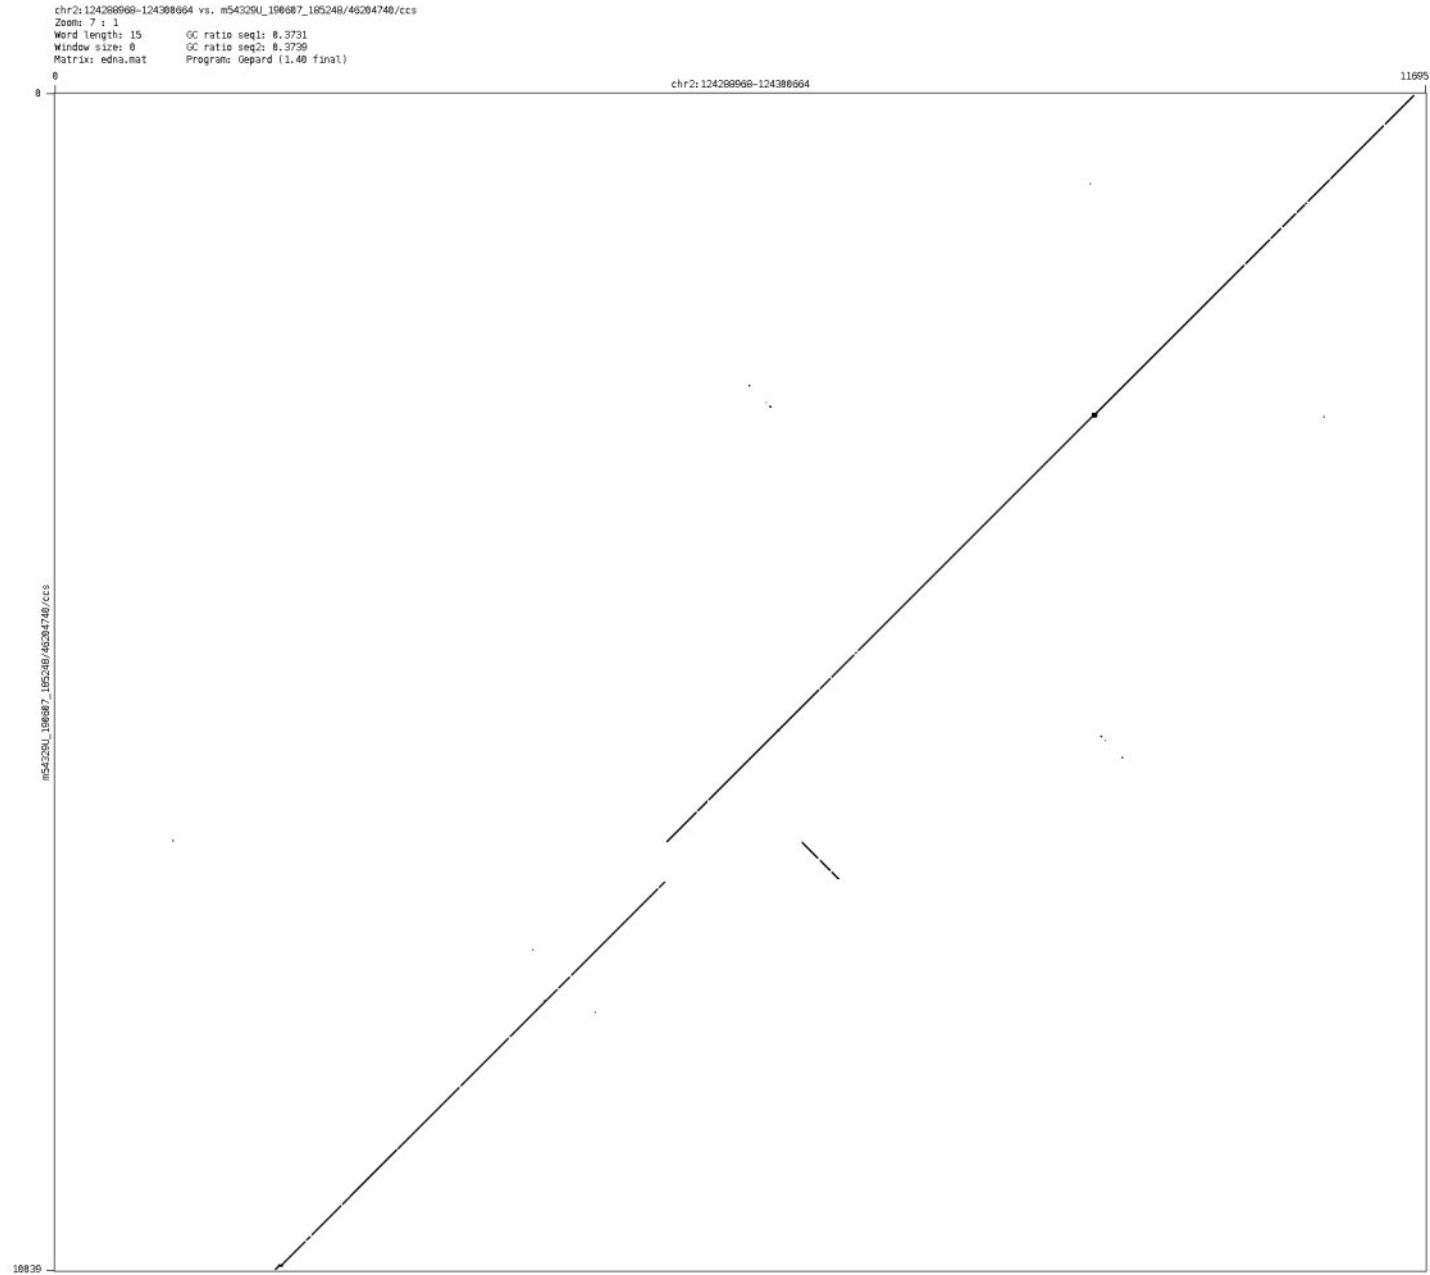



➤ chr2\_125008685\_125010825

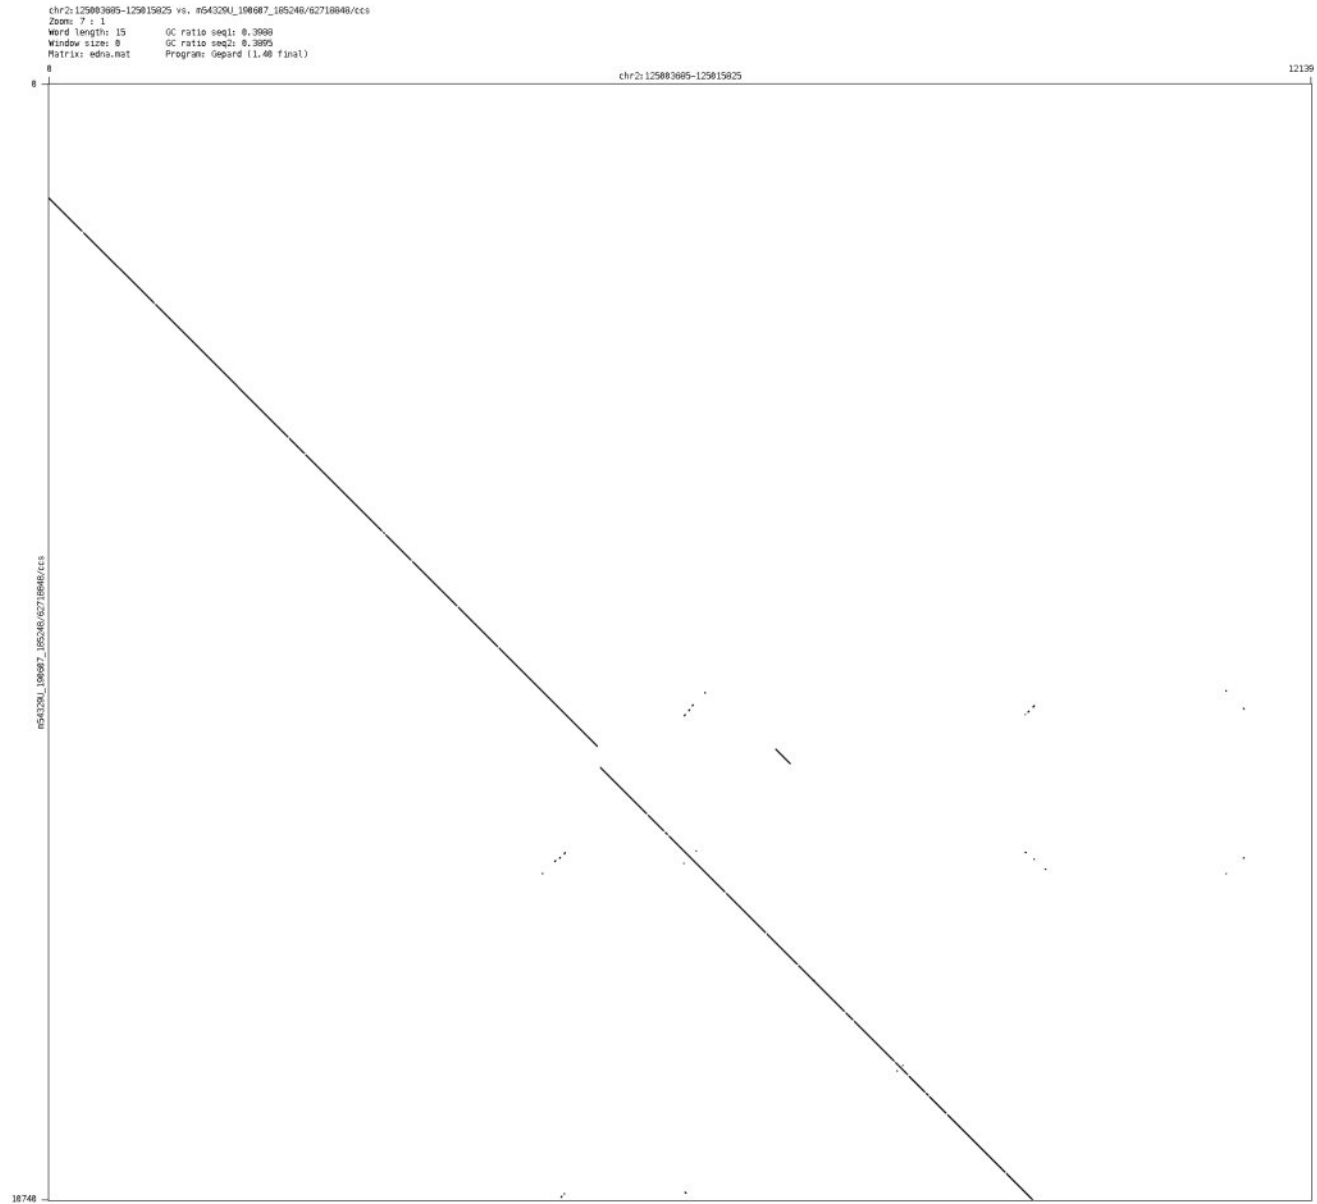

➤ chr2\_161074754\_161075236

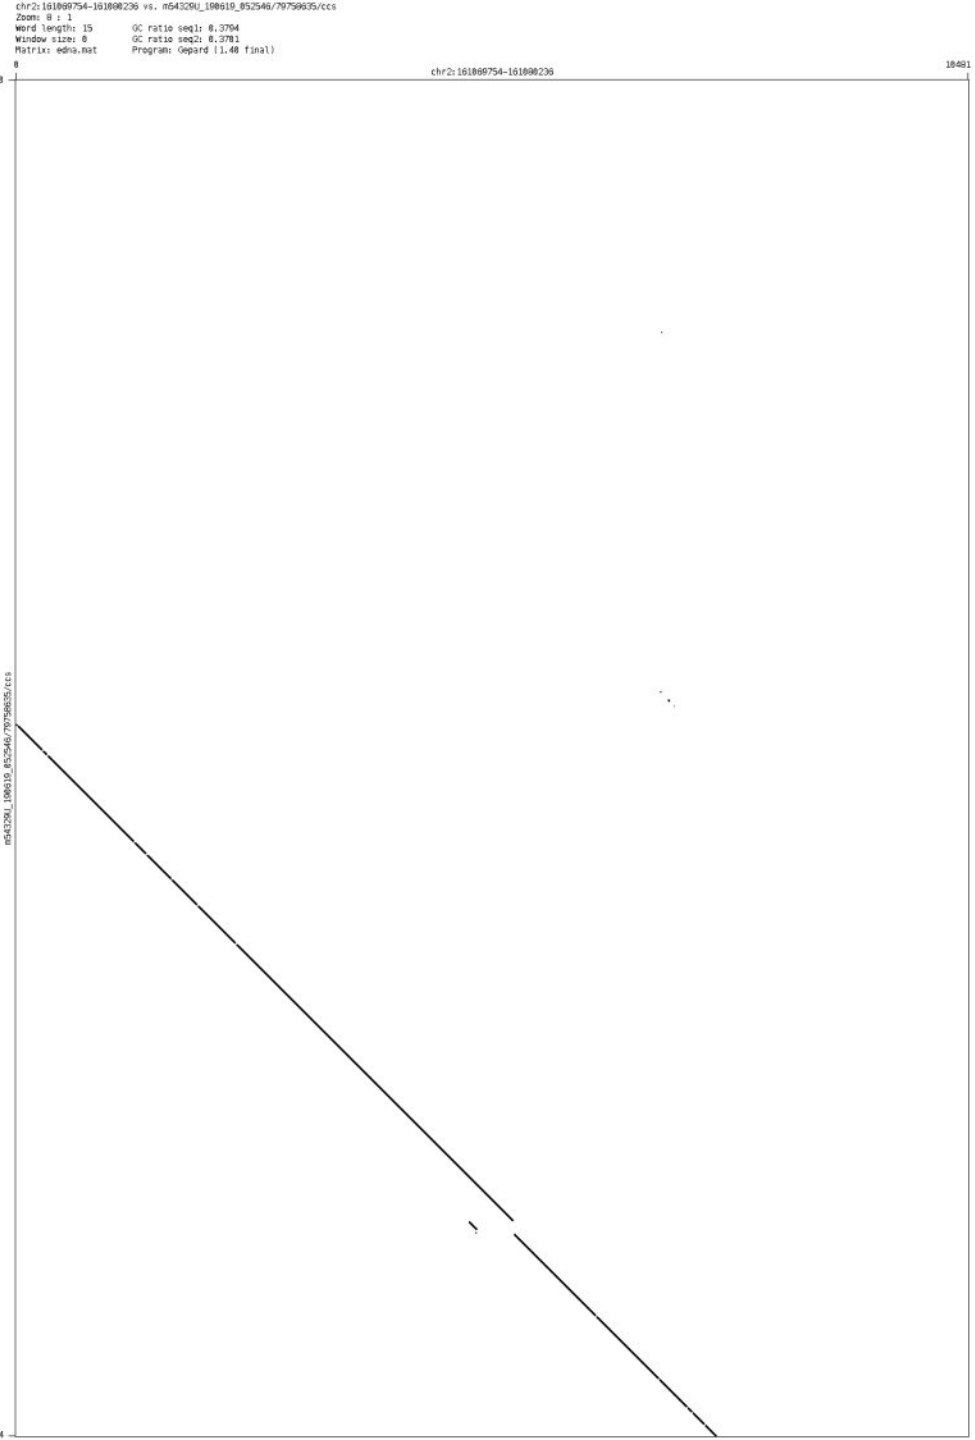

➤ chr2\_217805487\_217805794

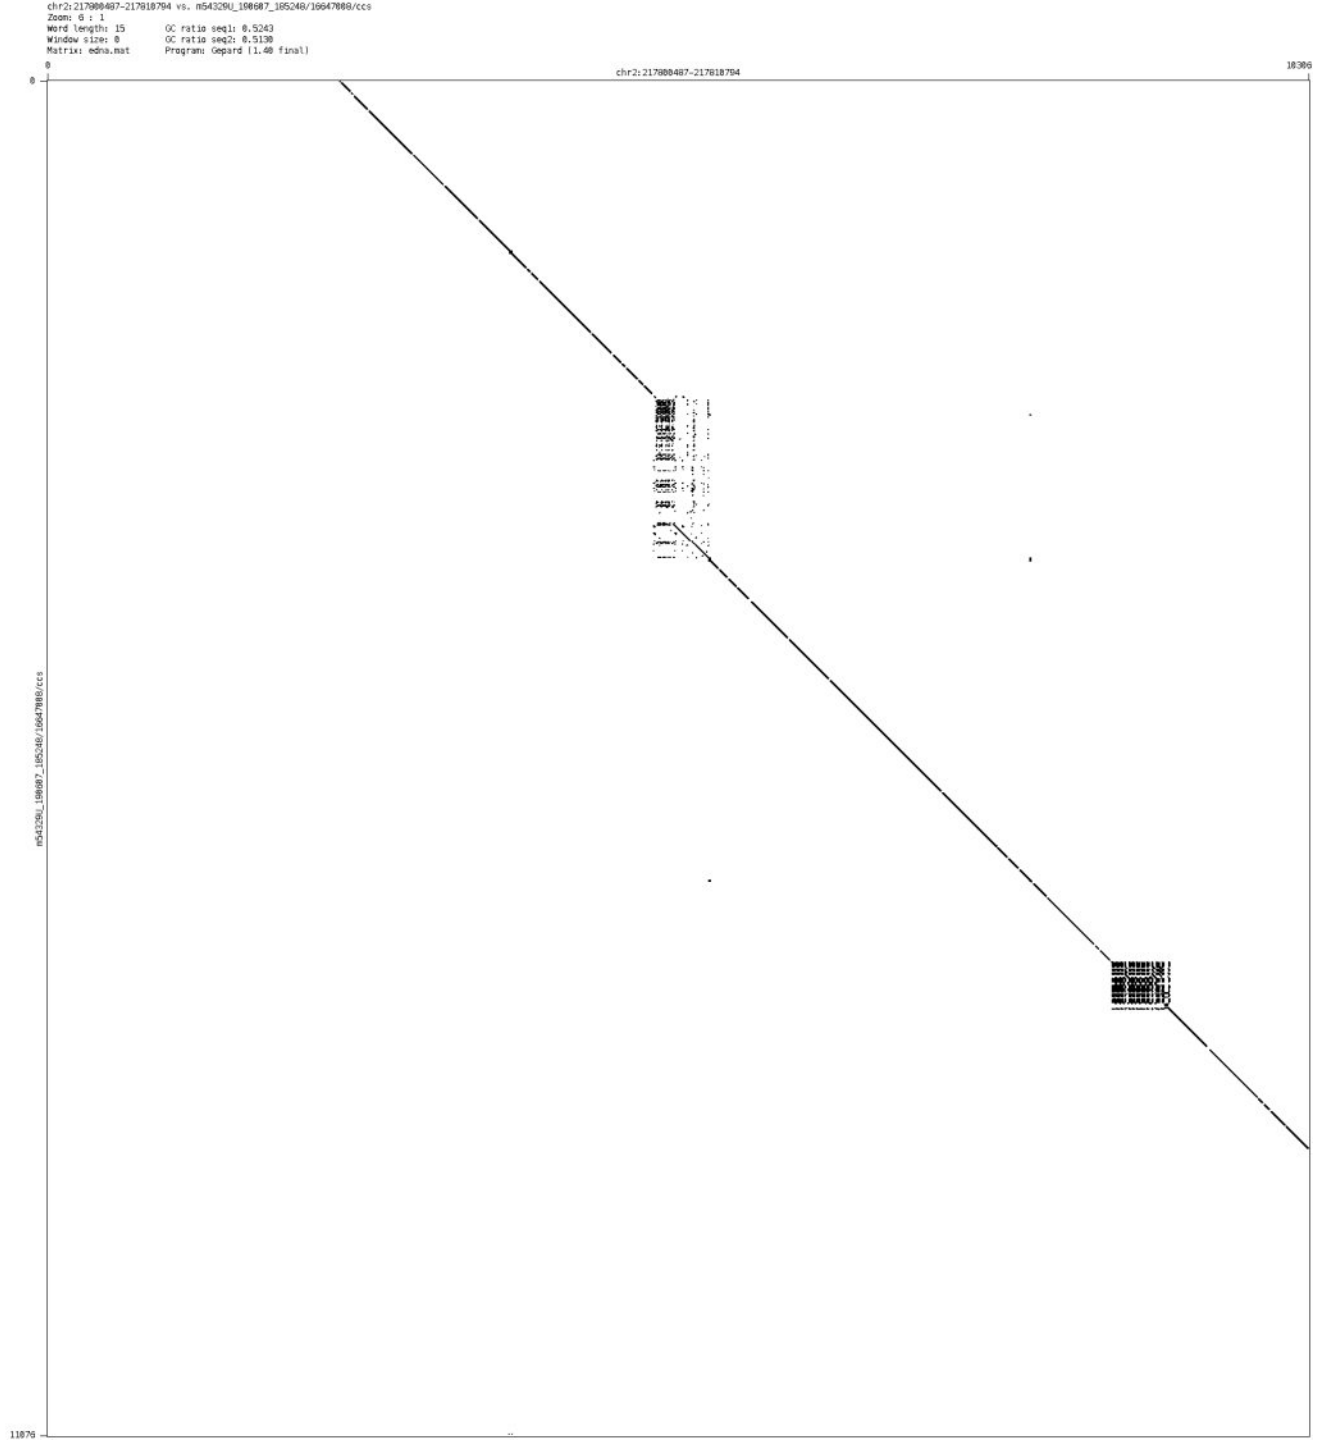

➤ chr2\_232995035\_232995577

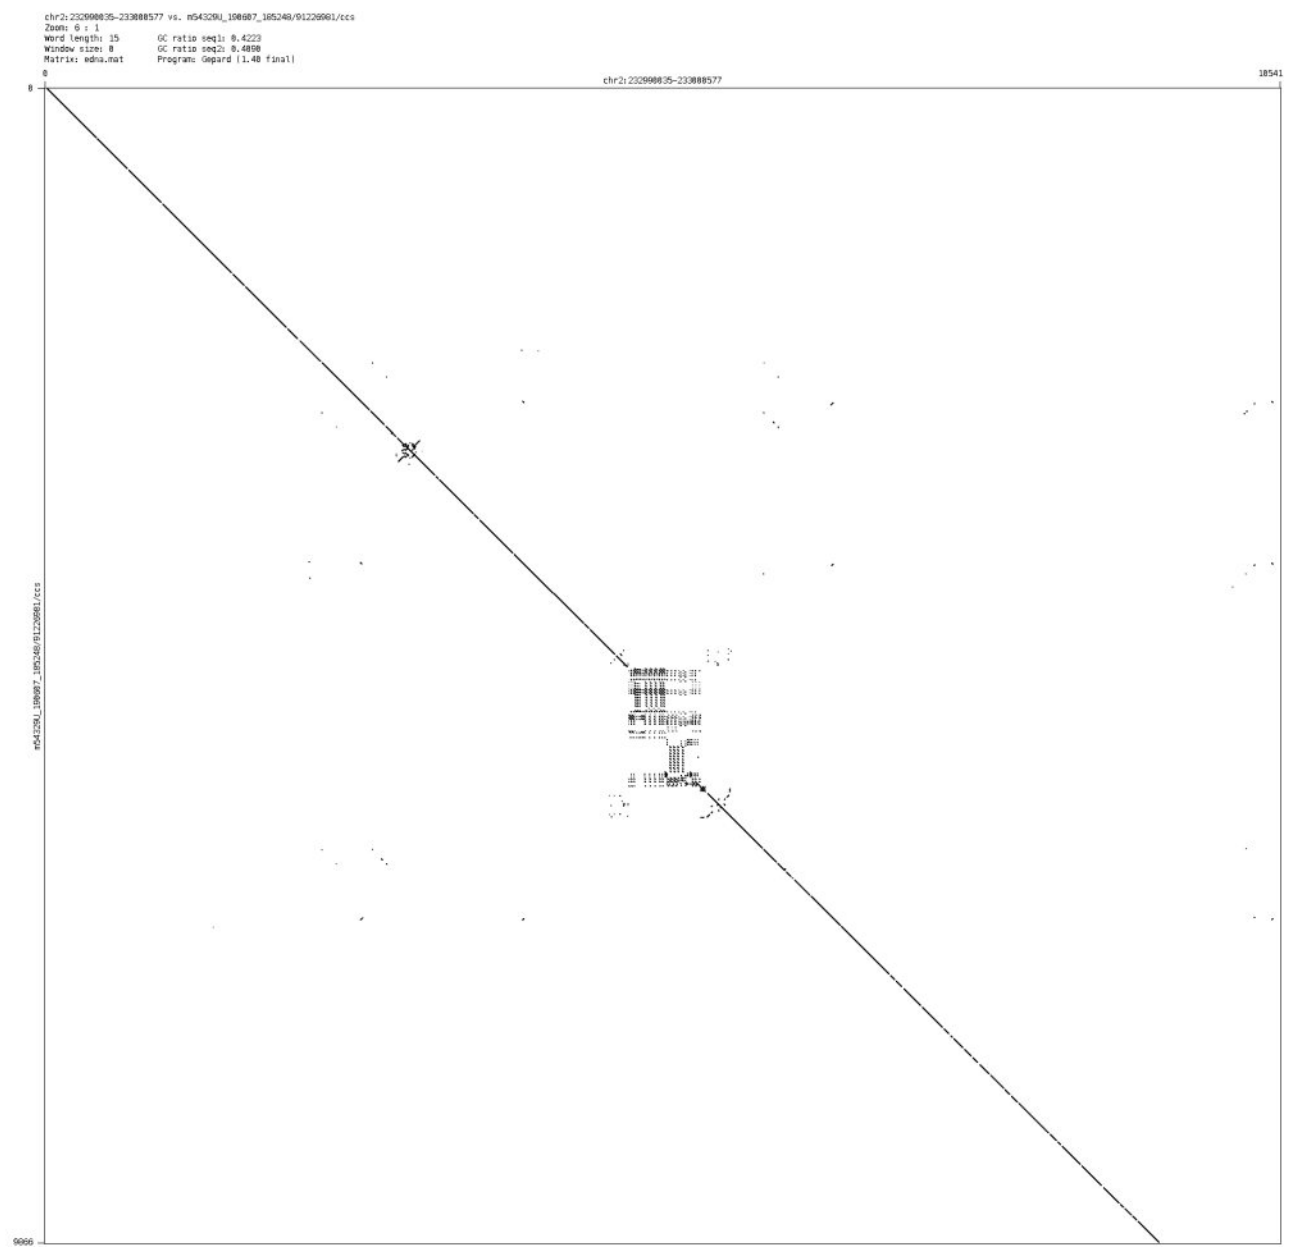

➤ chr2\_238870308\_238870448

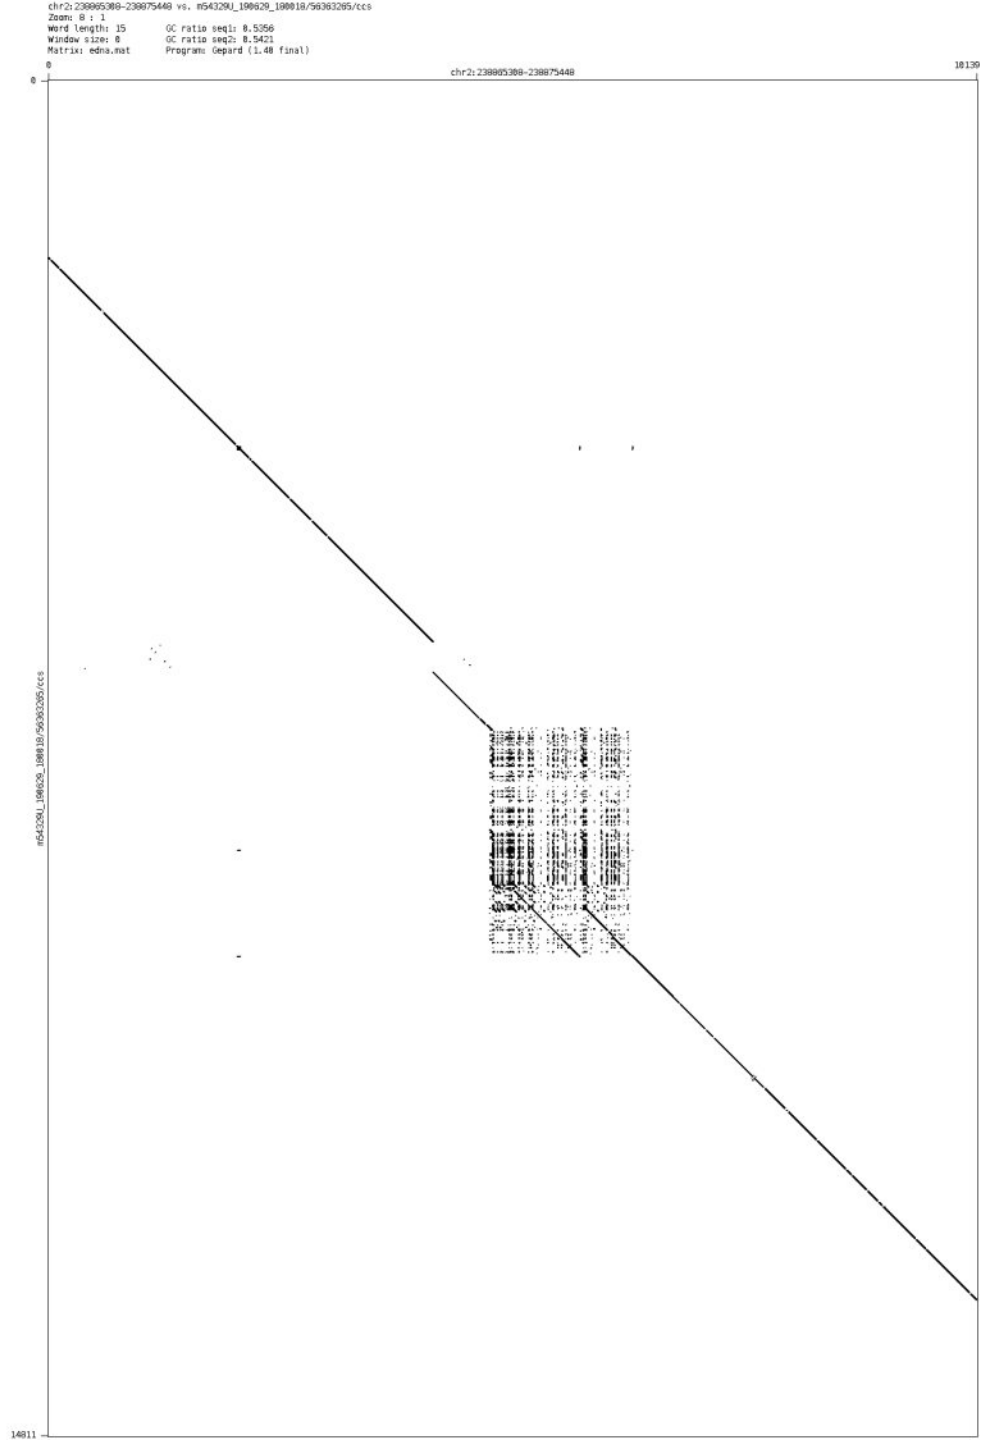

➤ chr2\_238909005\_238909139

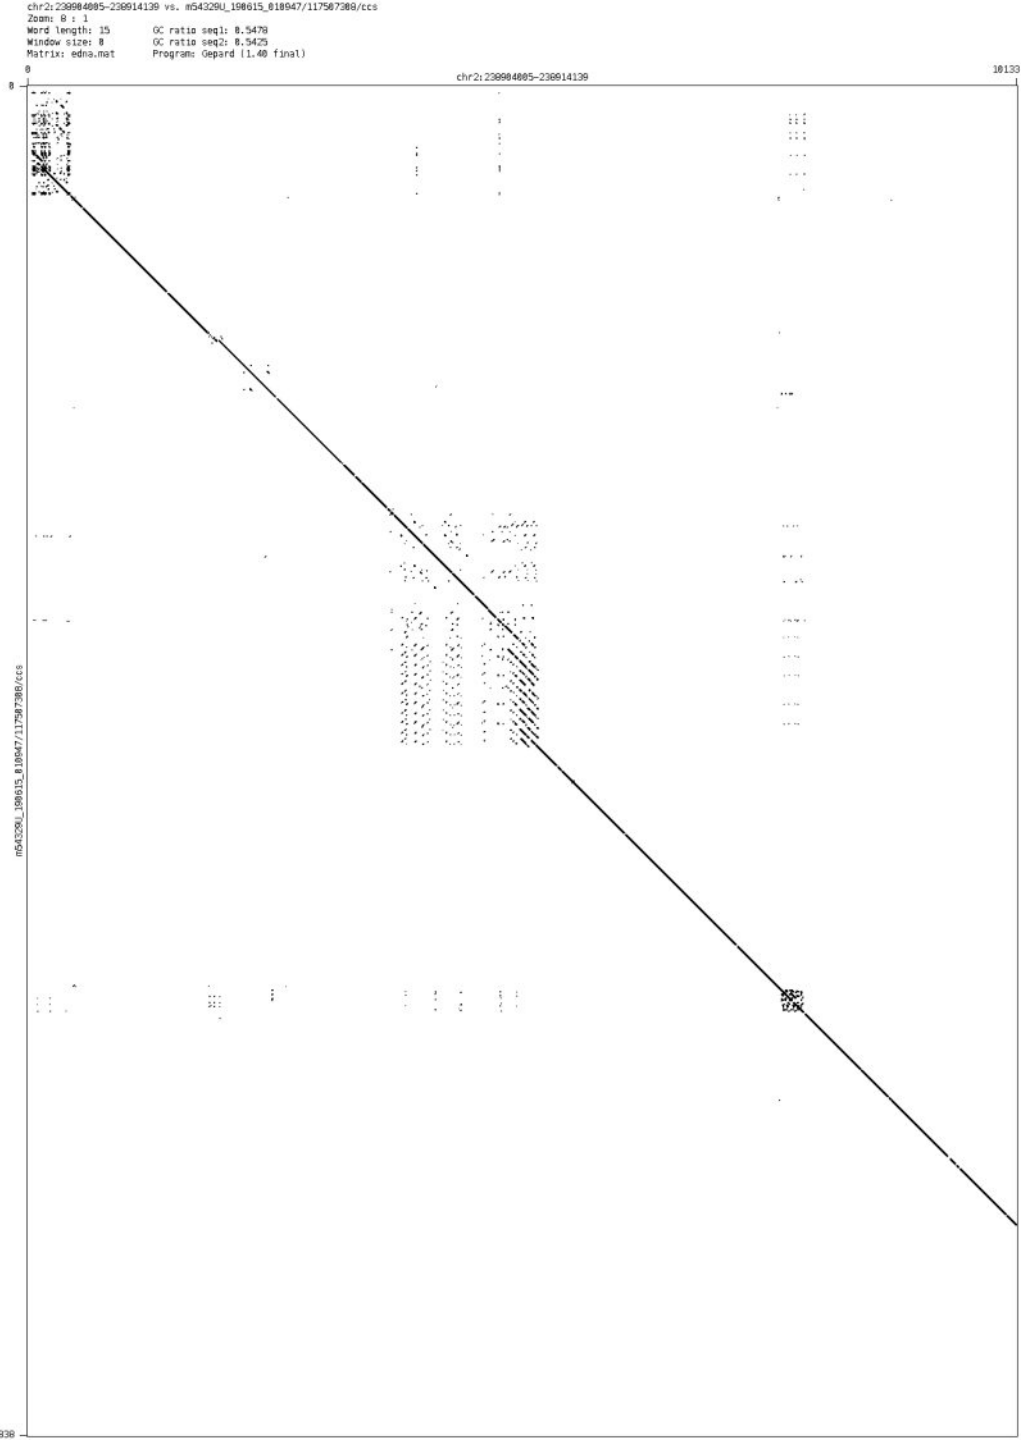

➤ chr2\_240158693\_240158783

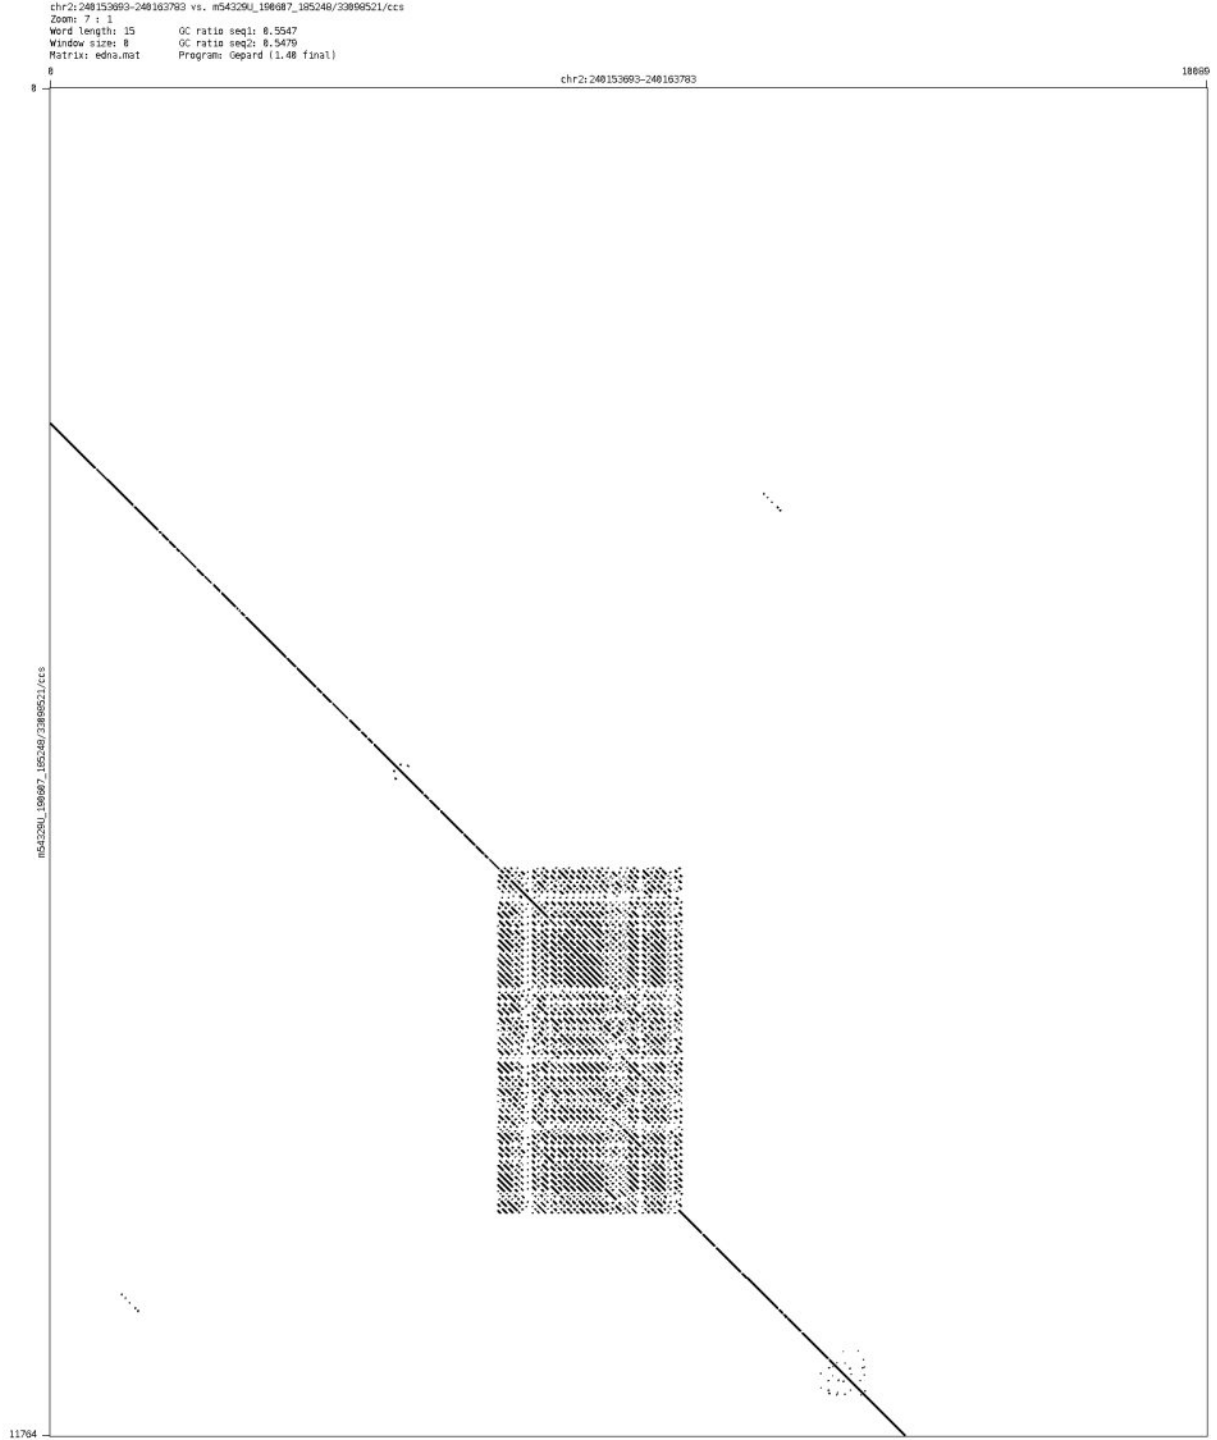

➤ chr2\_240527386\_240527609

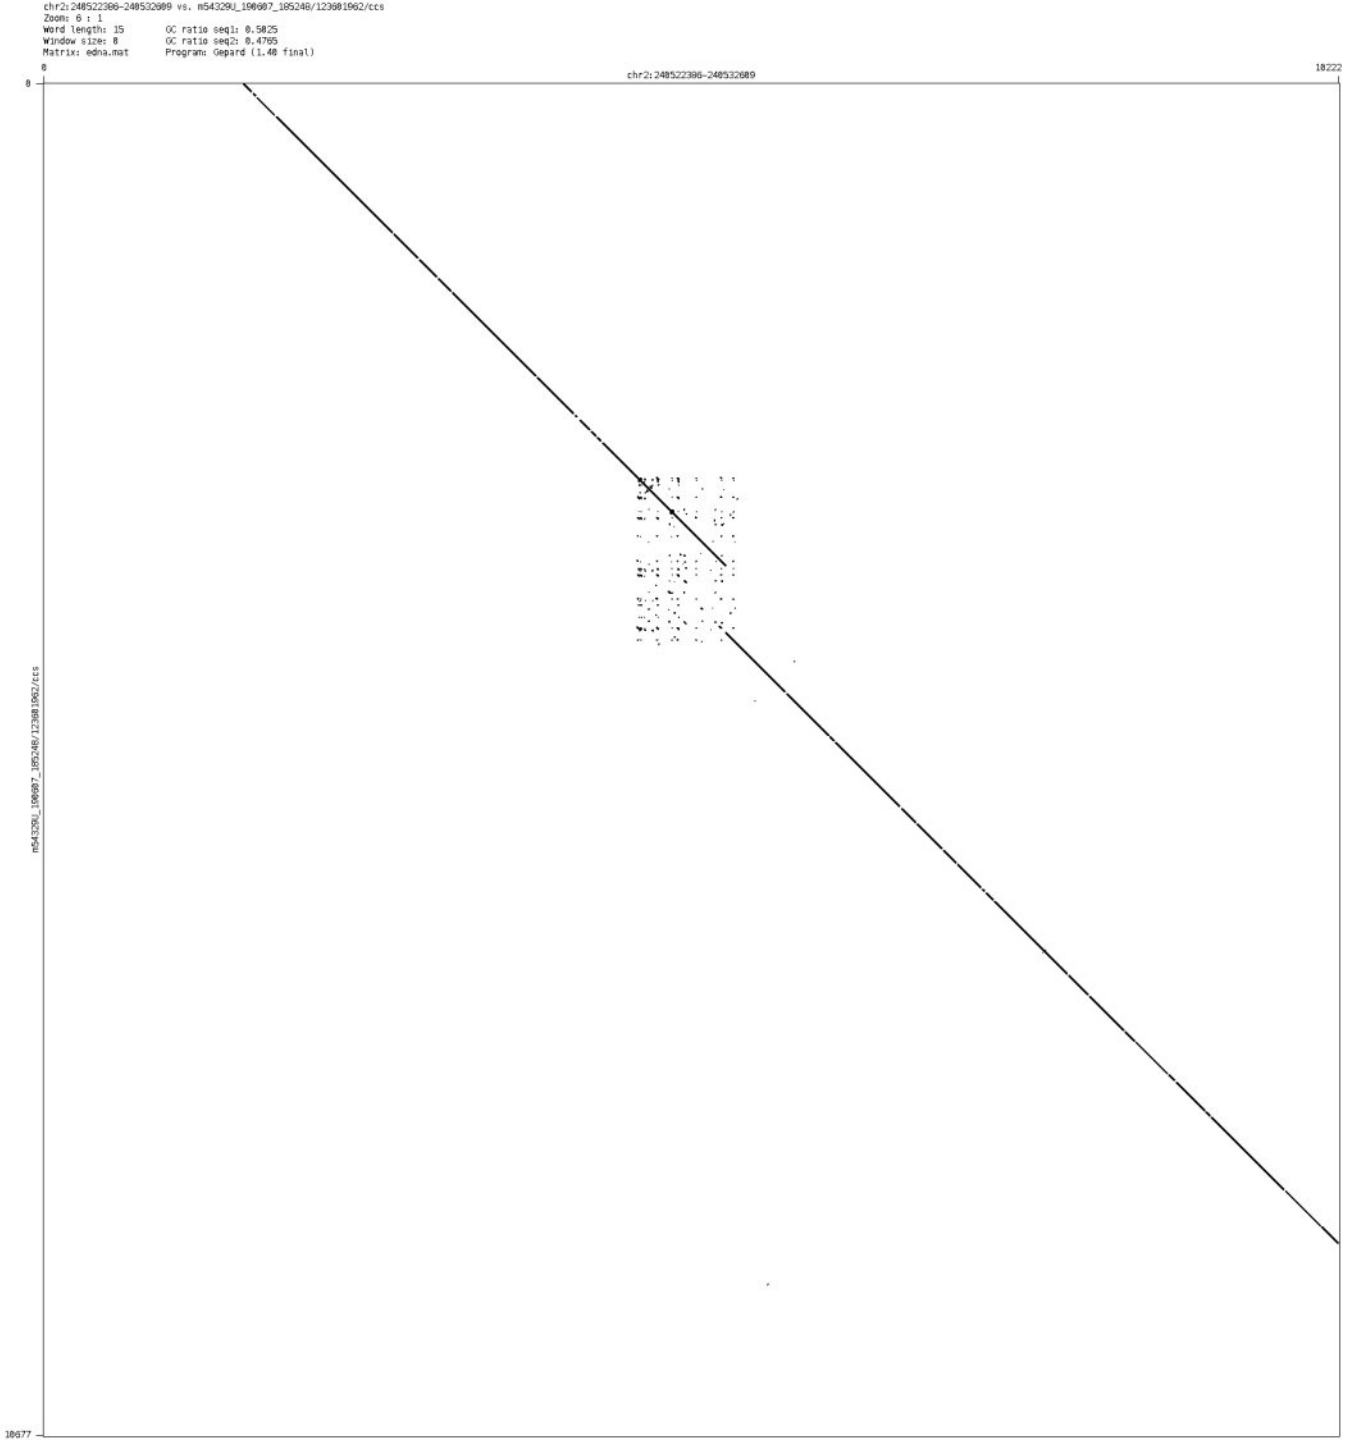



➤ chr2\_240786636\_240786828

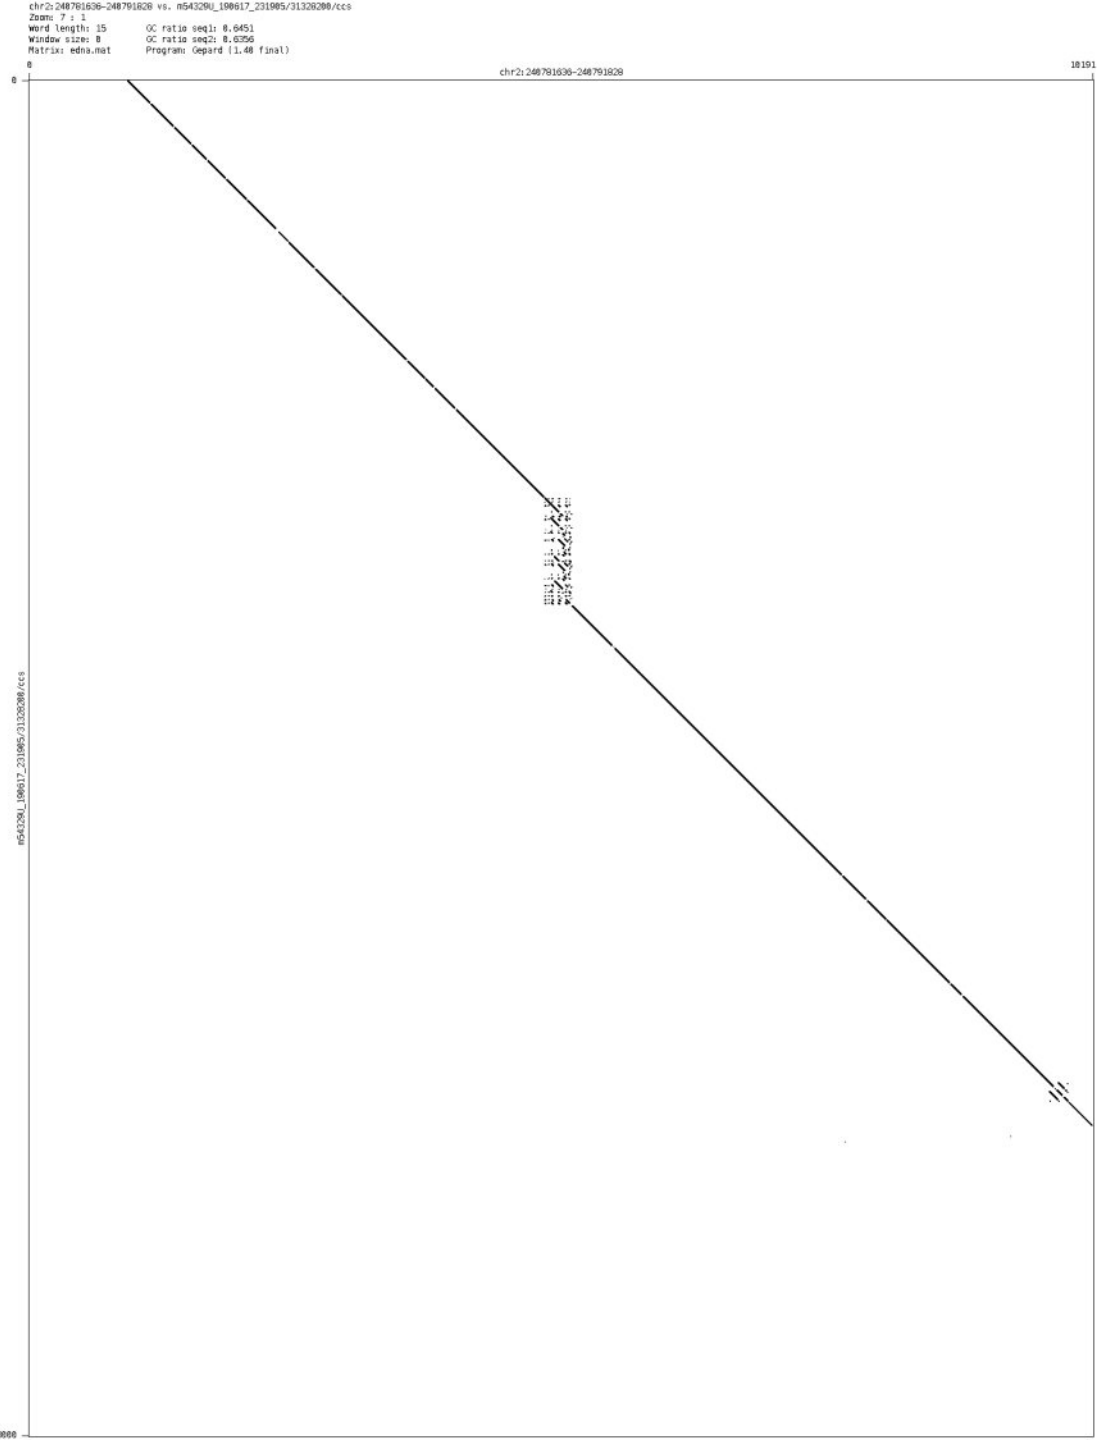

➤ chr2\_240872289\_240872460

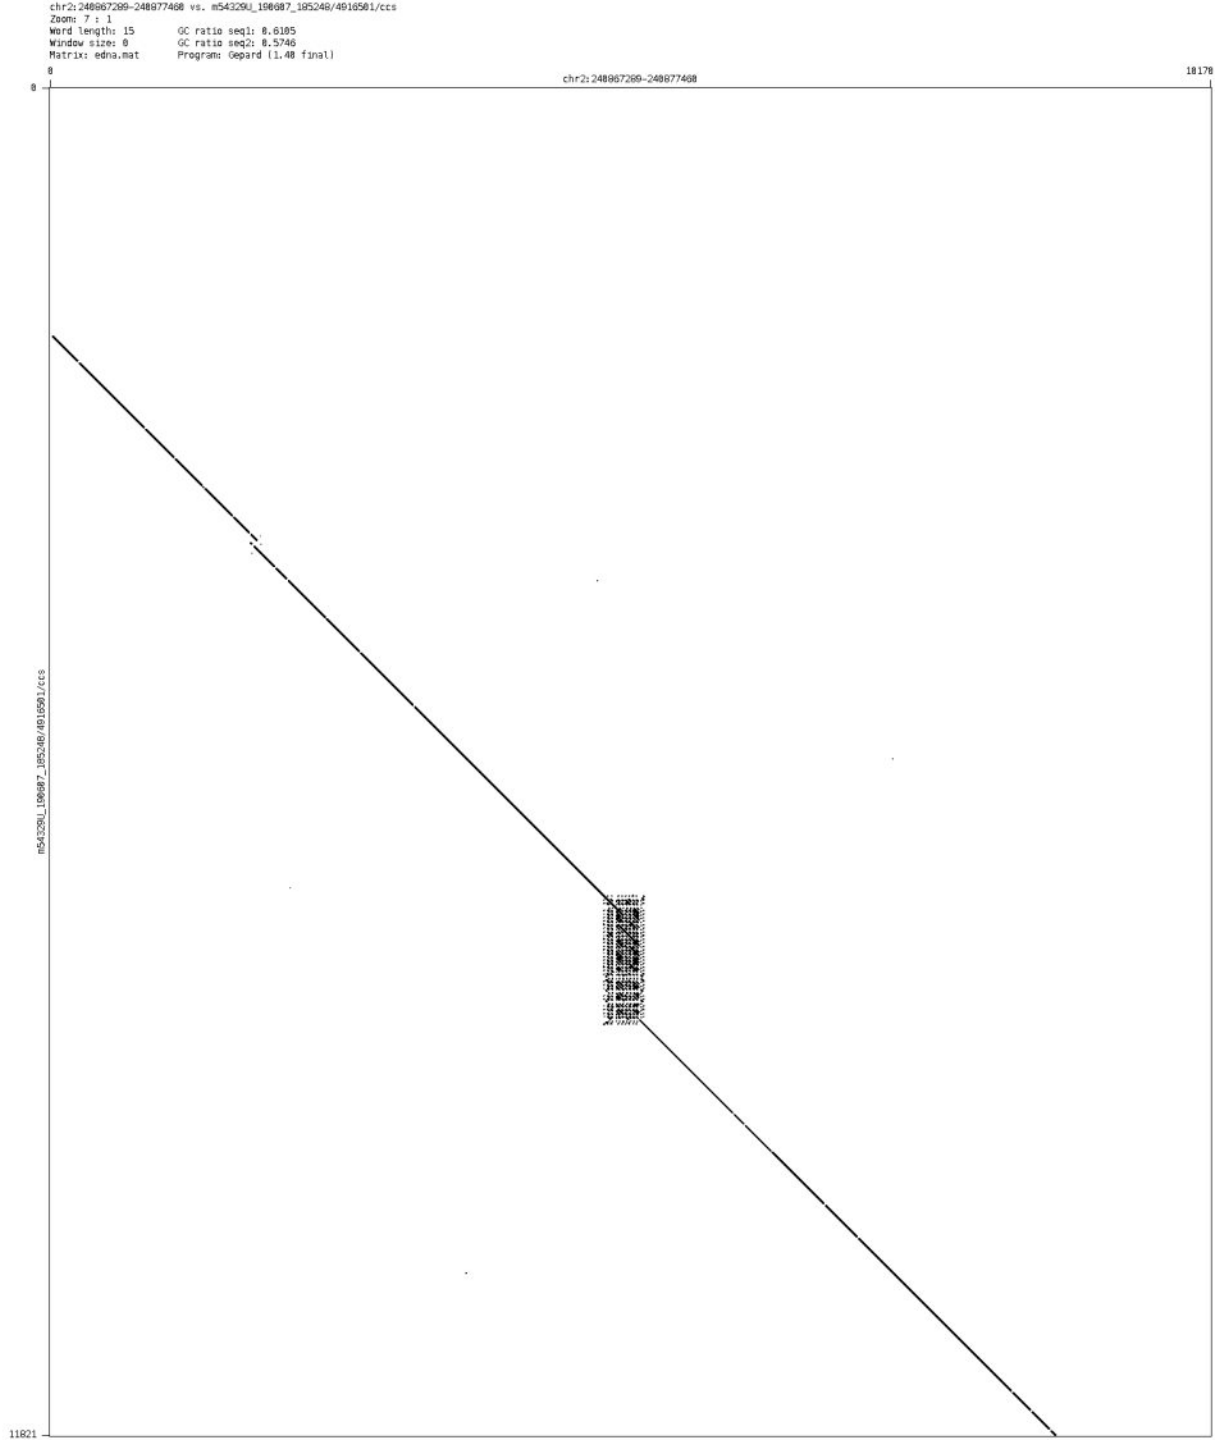

➤ chr3\_1707476\_1708557

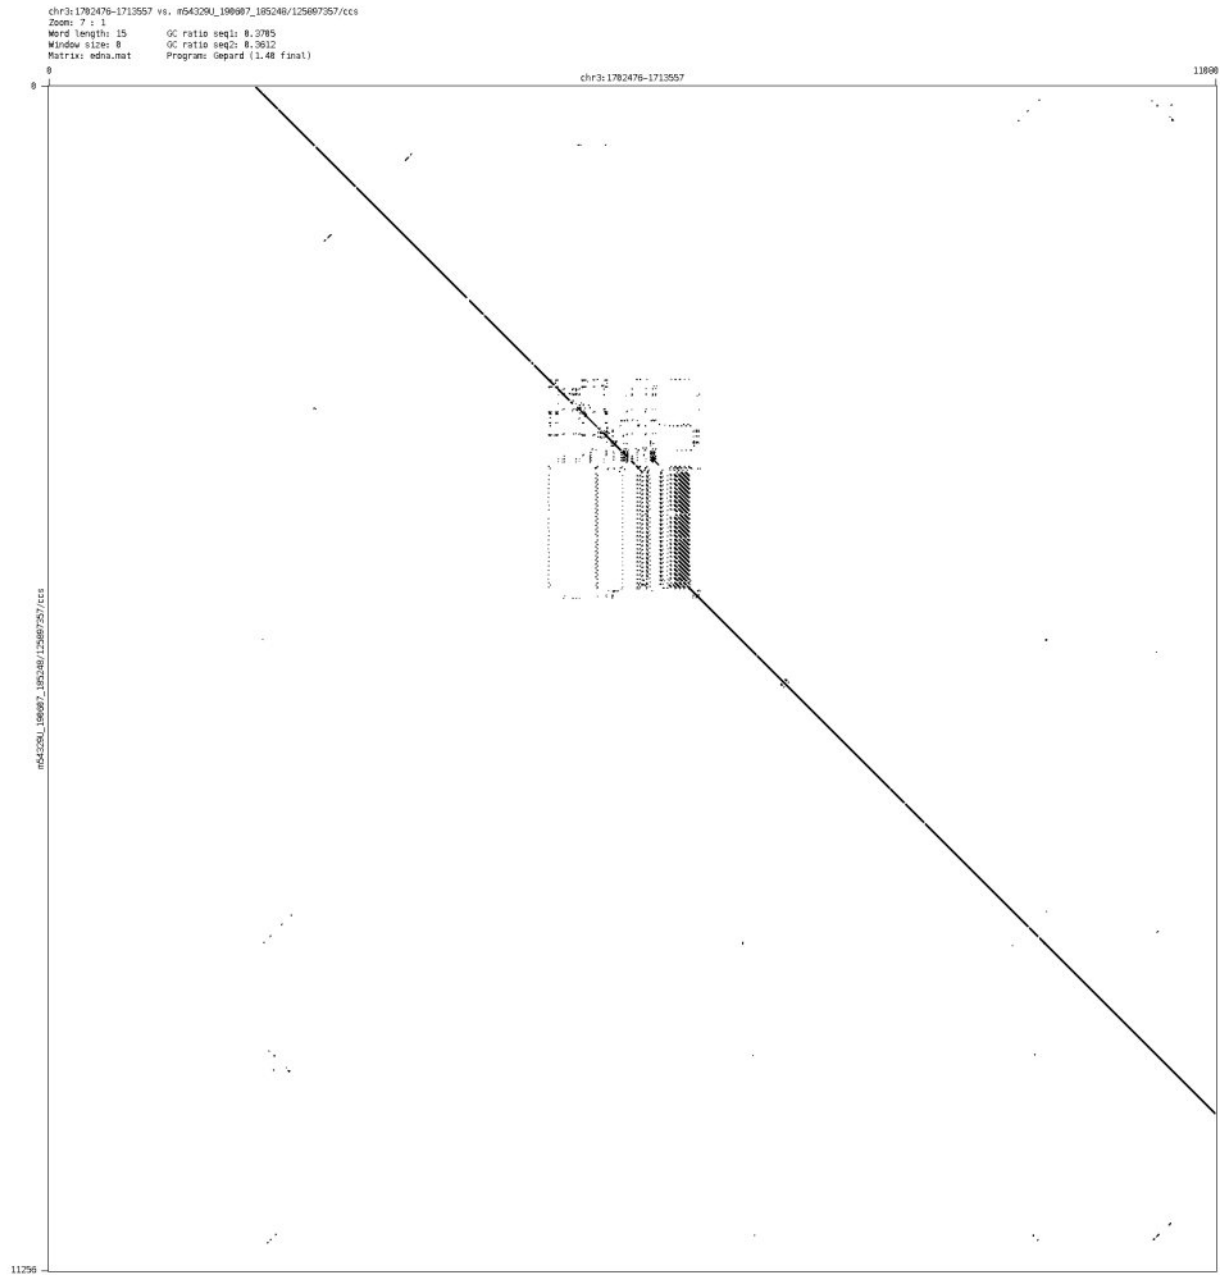

➤ chr3\_6604527\_6613044

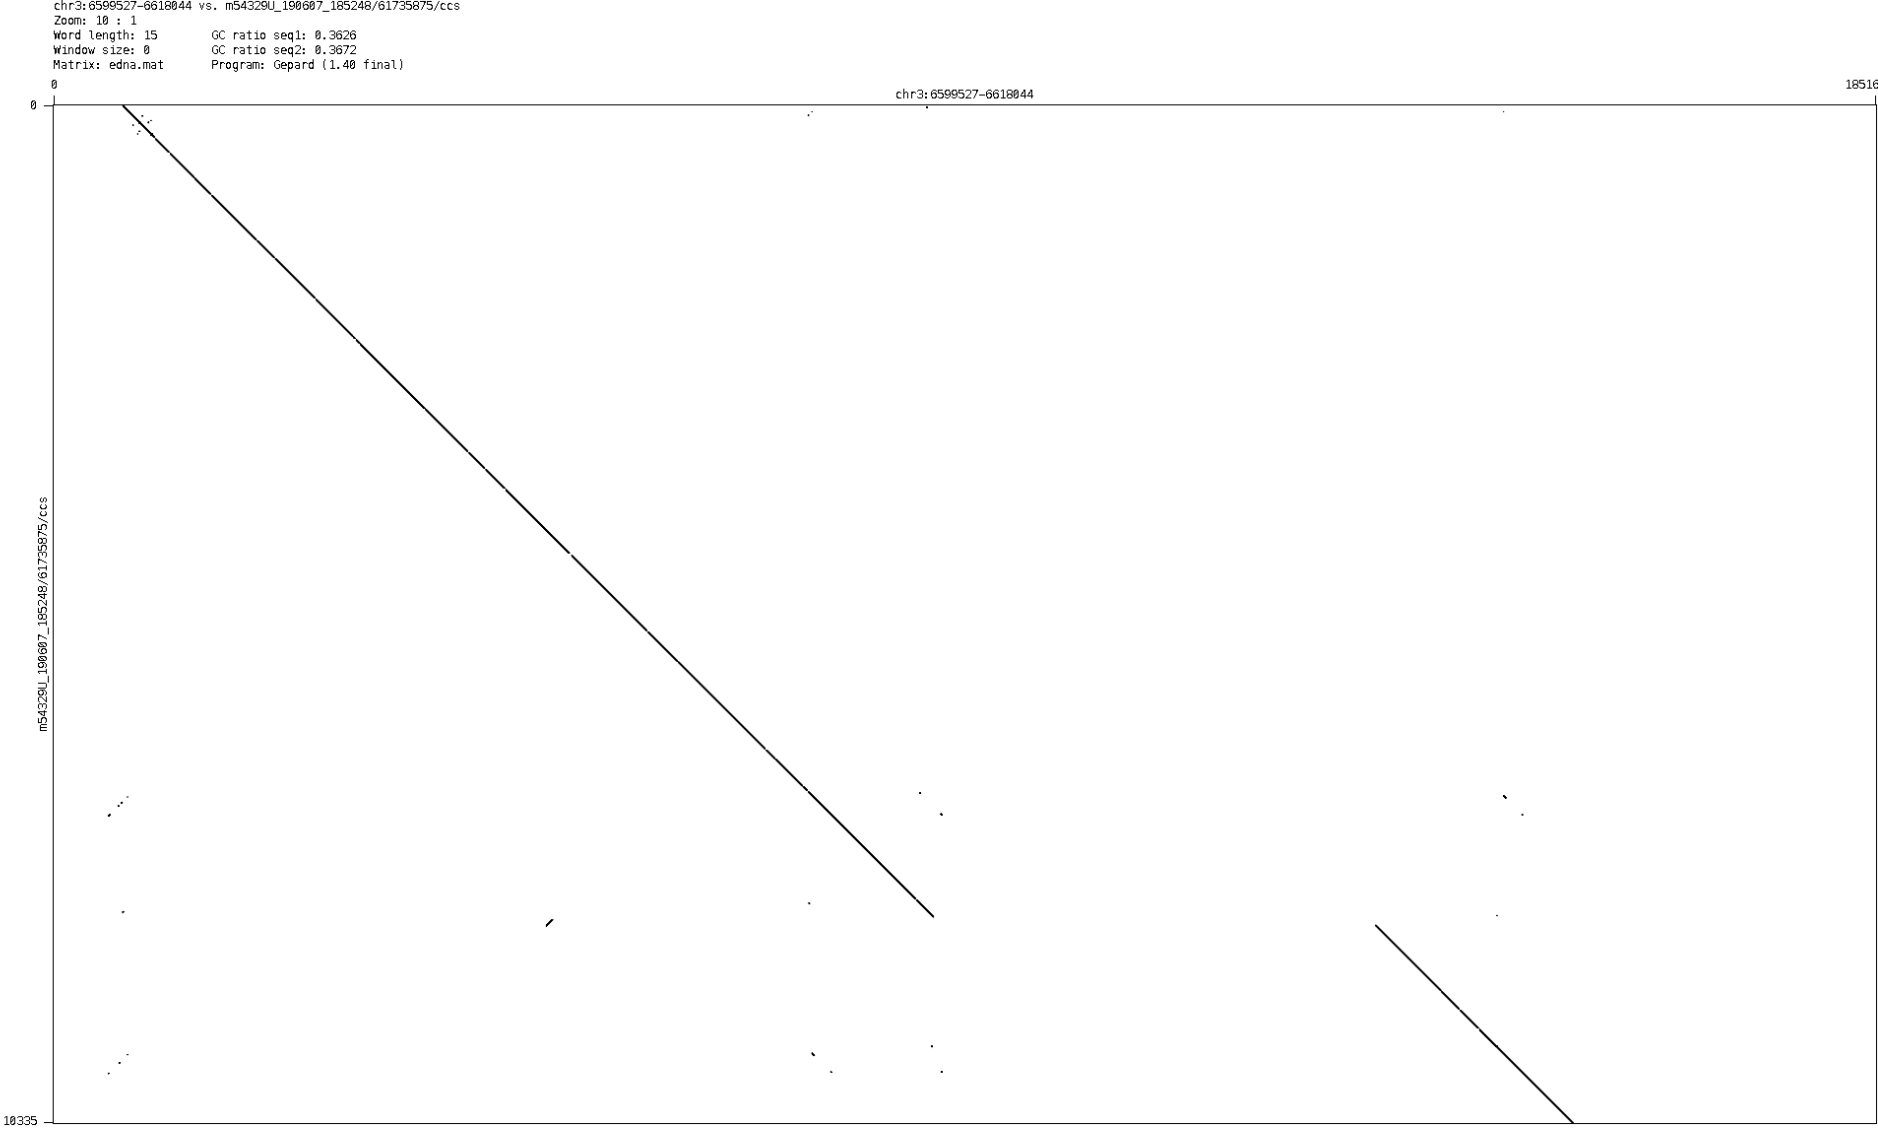

➤ chr3\_38084451\_38084565

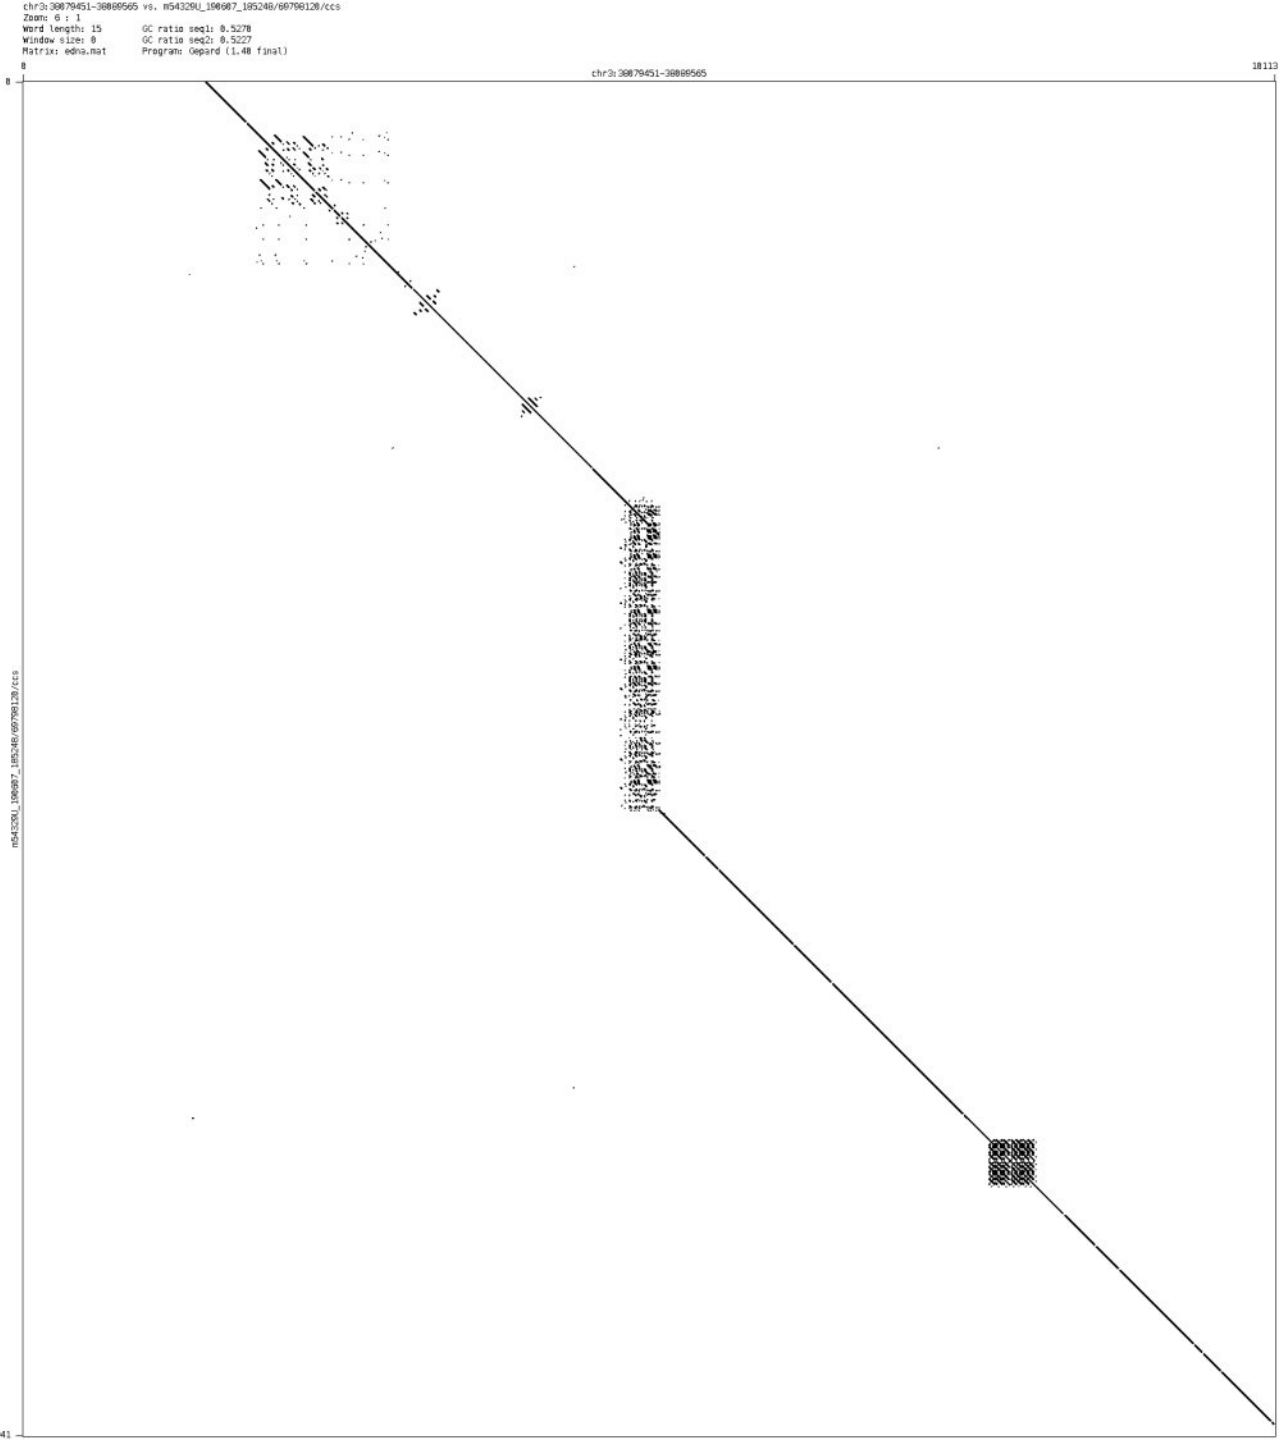

➤ chr3\_41320442\_41322556

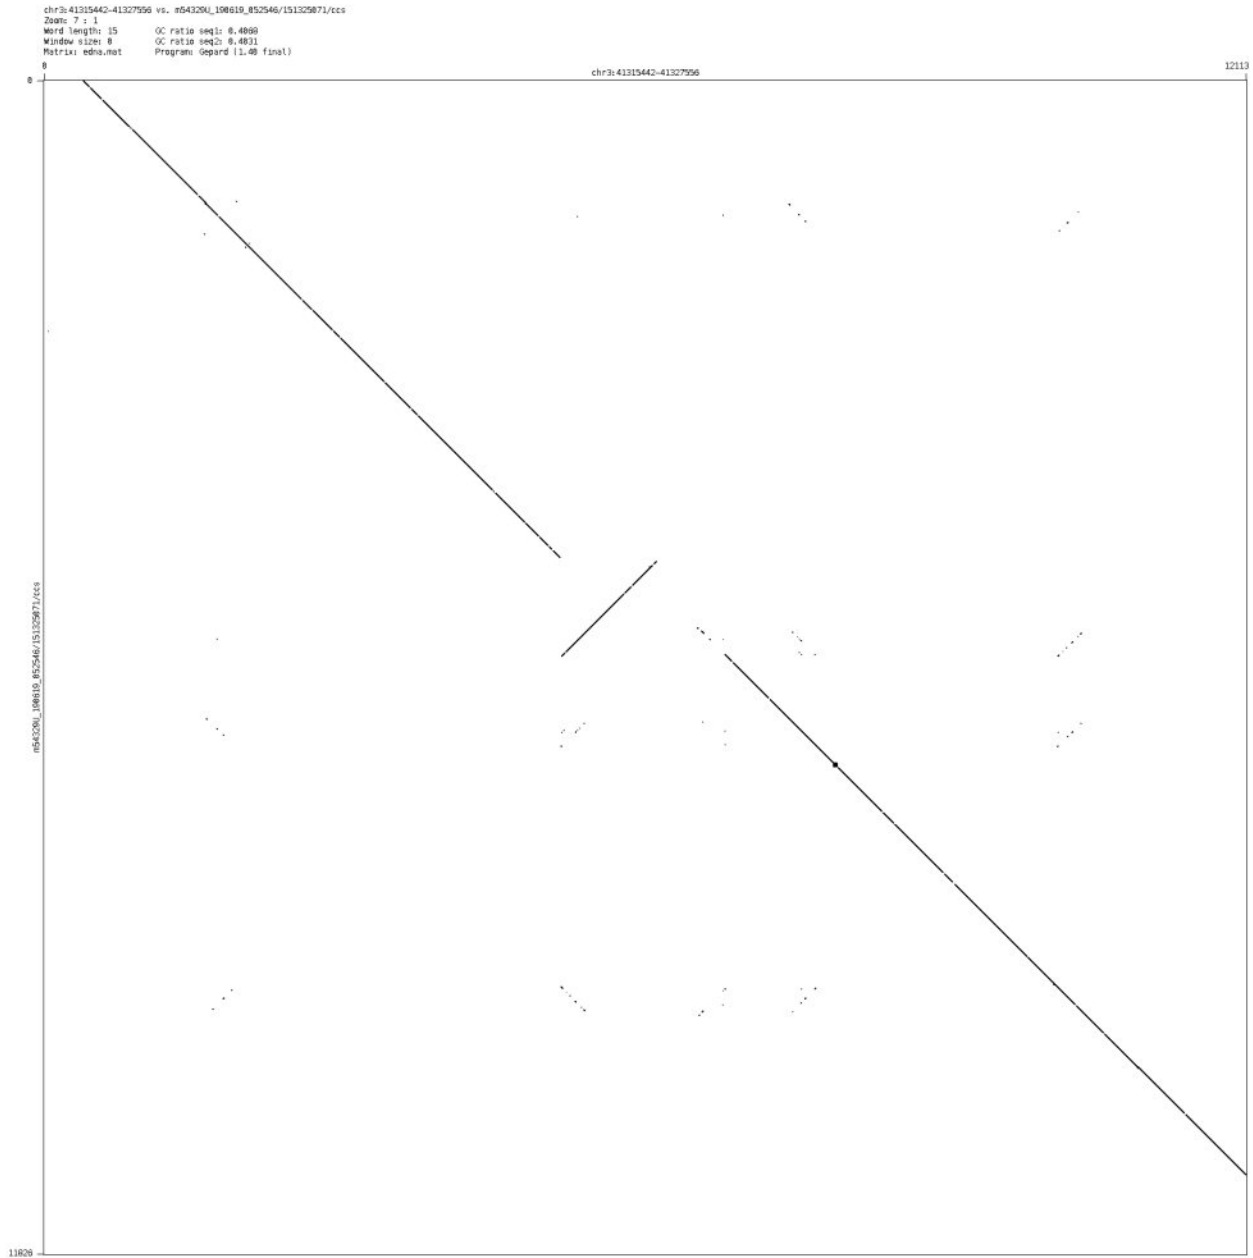

➤ chr3\_50311835\_50312092

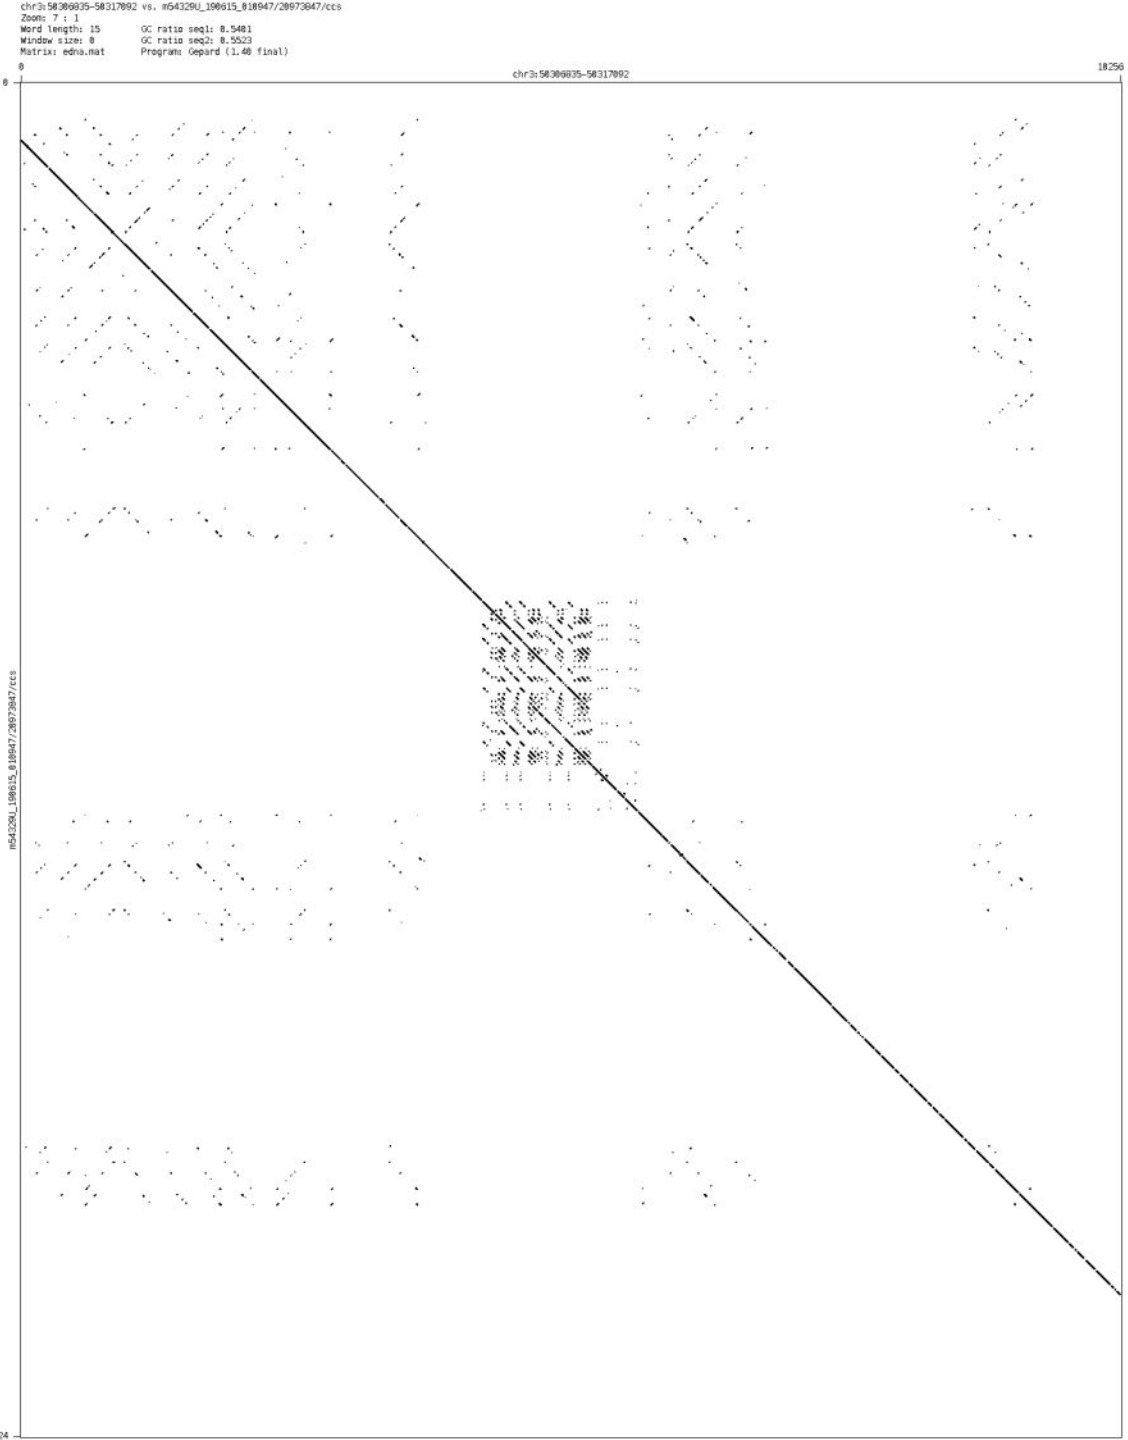

➤ chr3\_77355086\_77355236

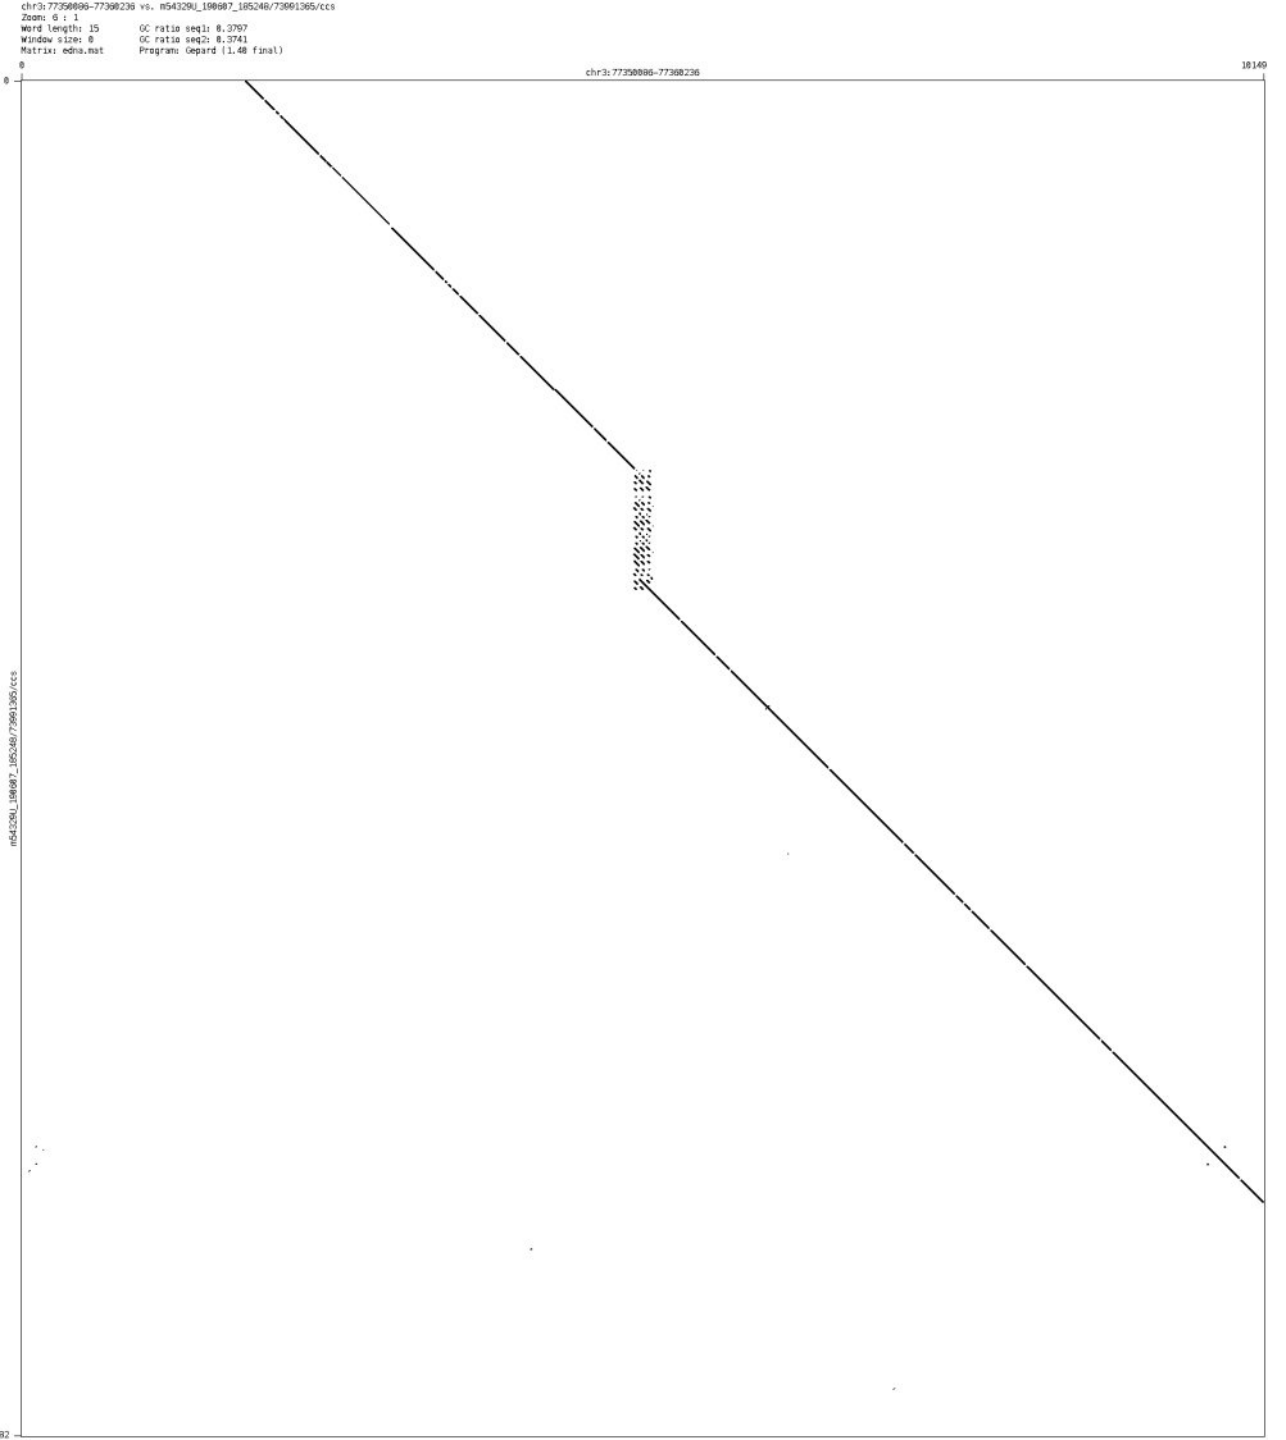



➤ chr3\_80013338\_80016105

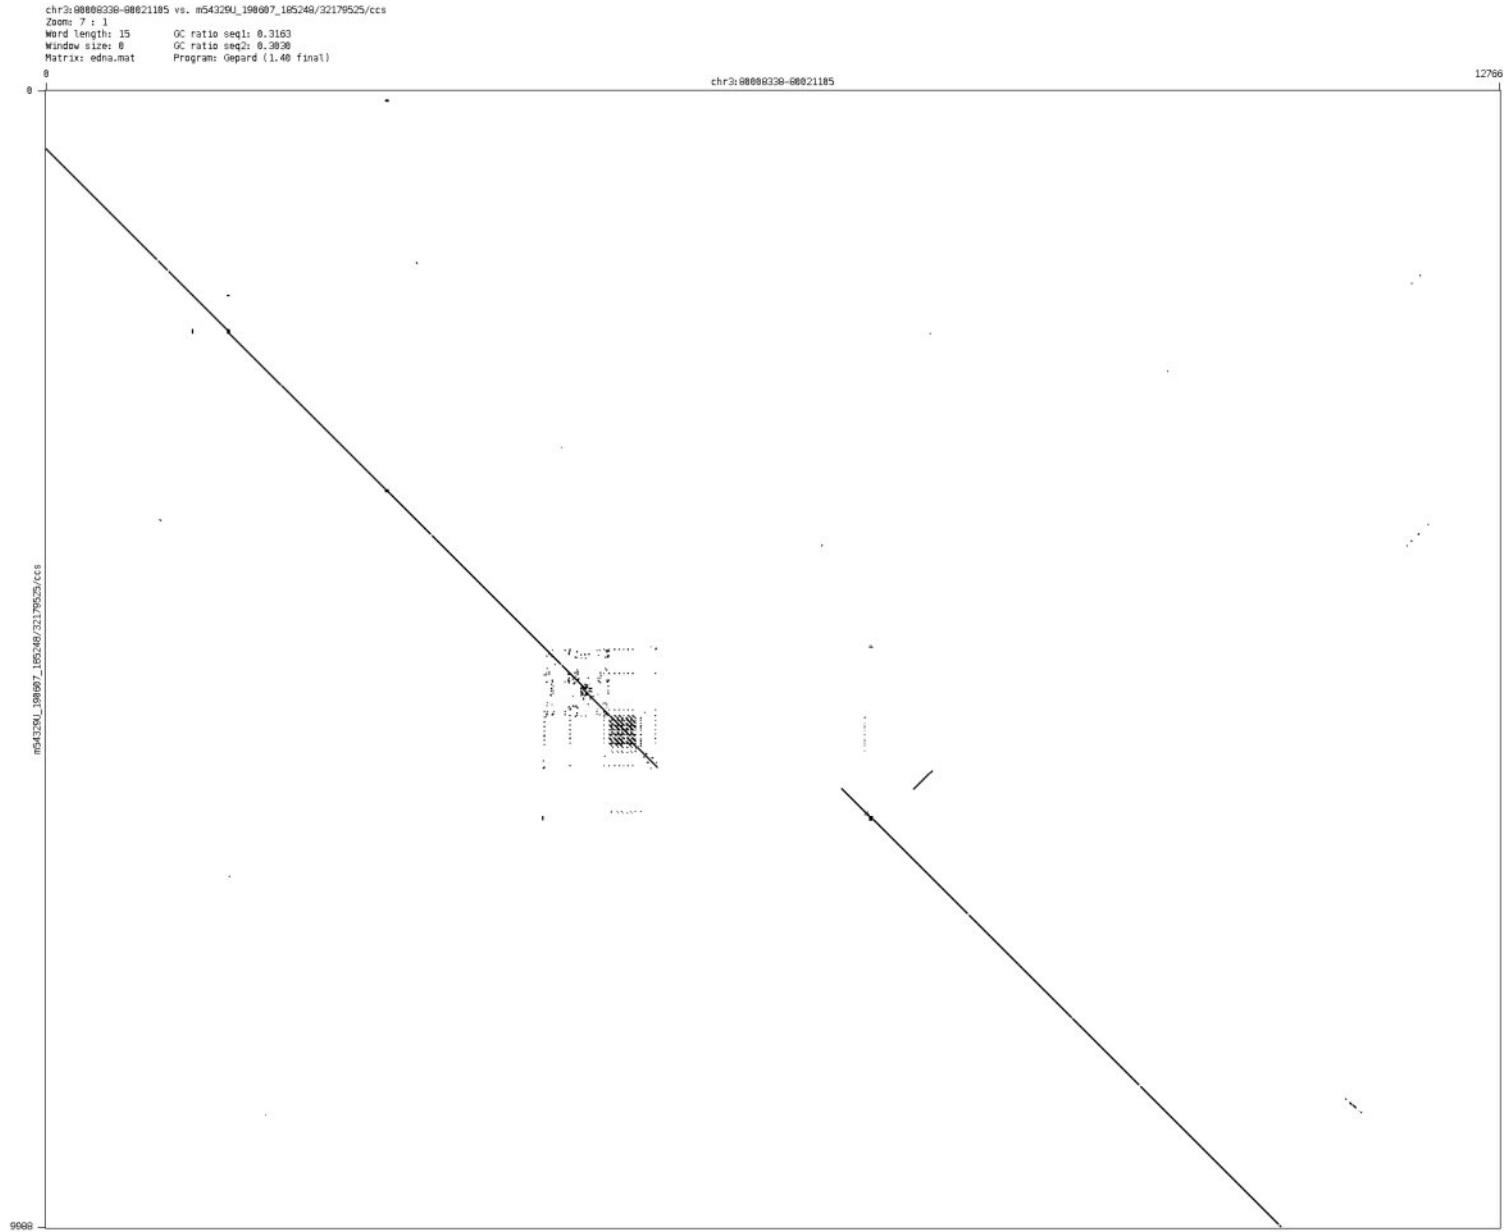

➤ chr3\_95749273\_95752156

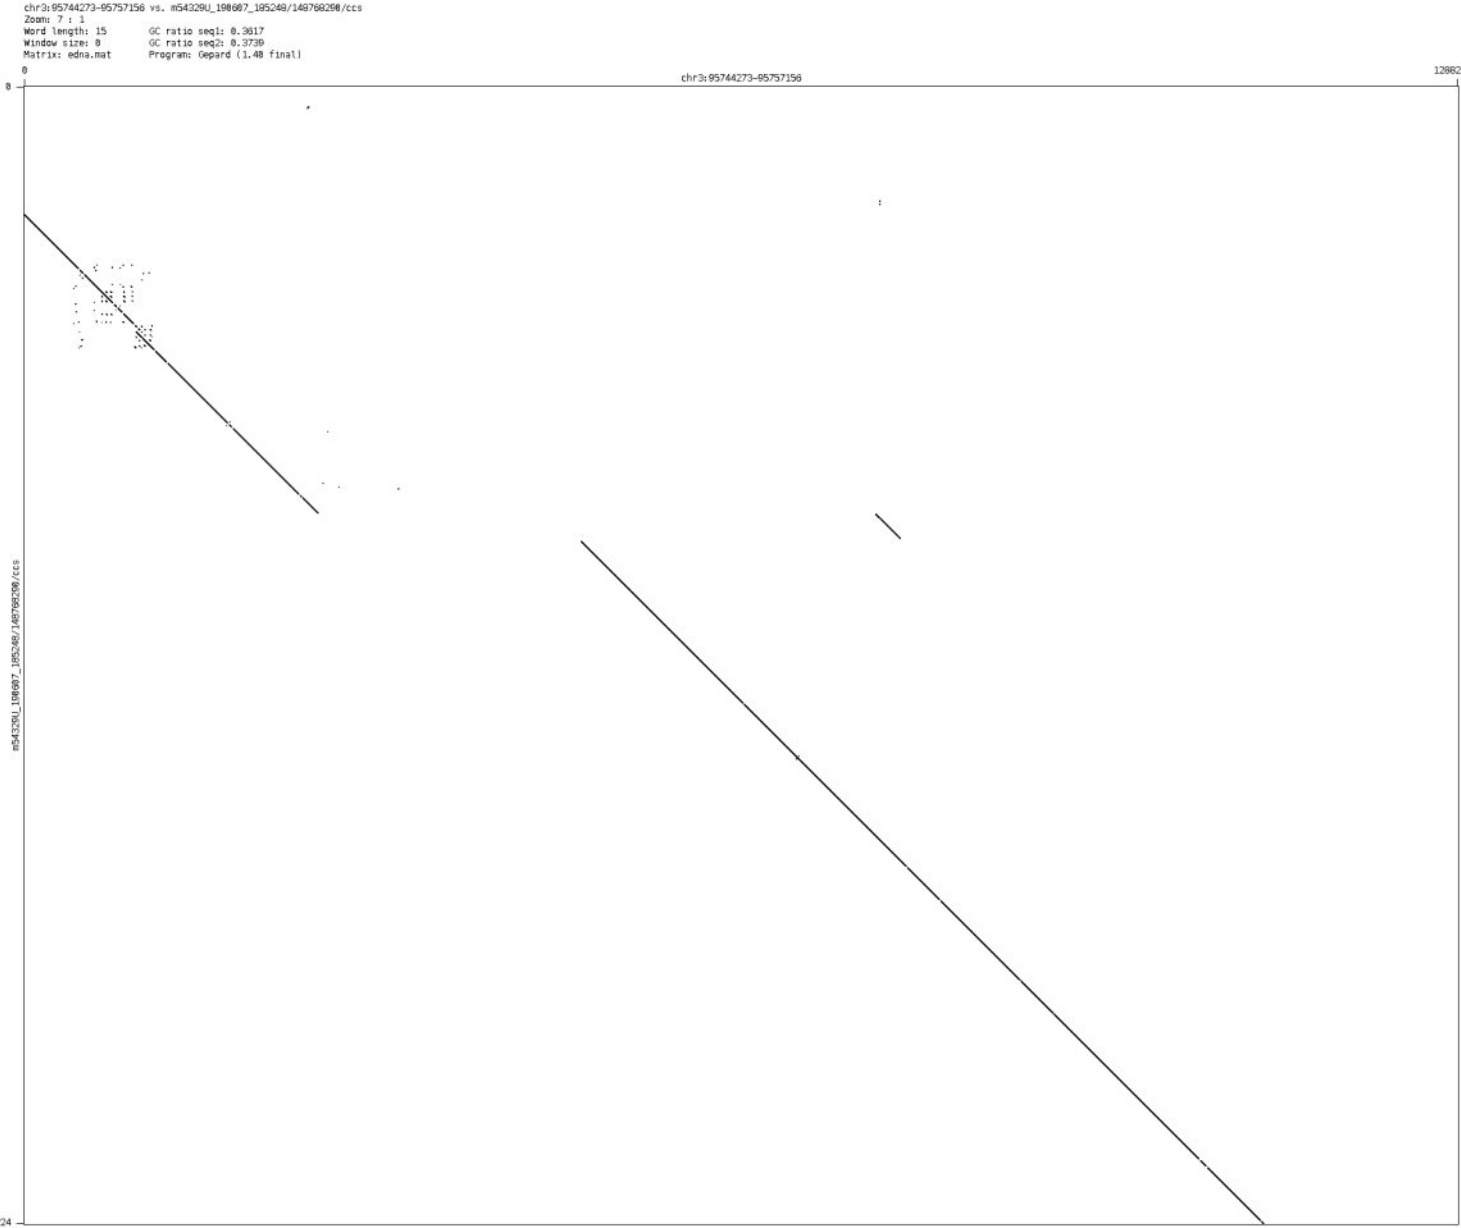

➤ chr3\_131988873\_131994701

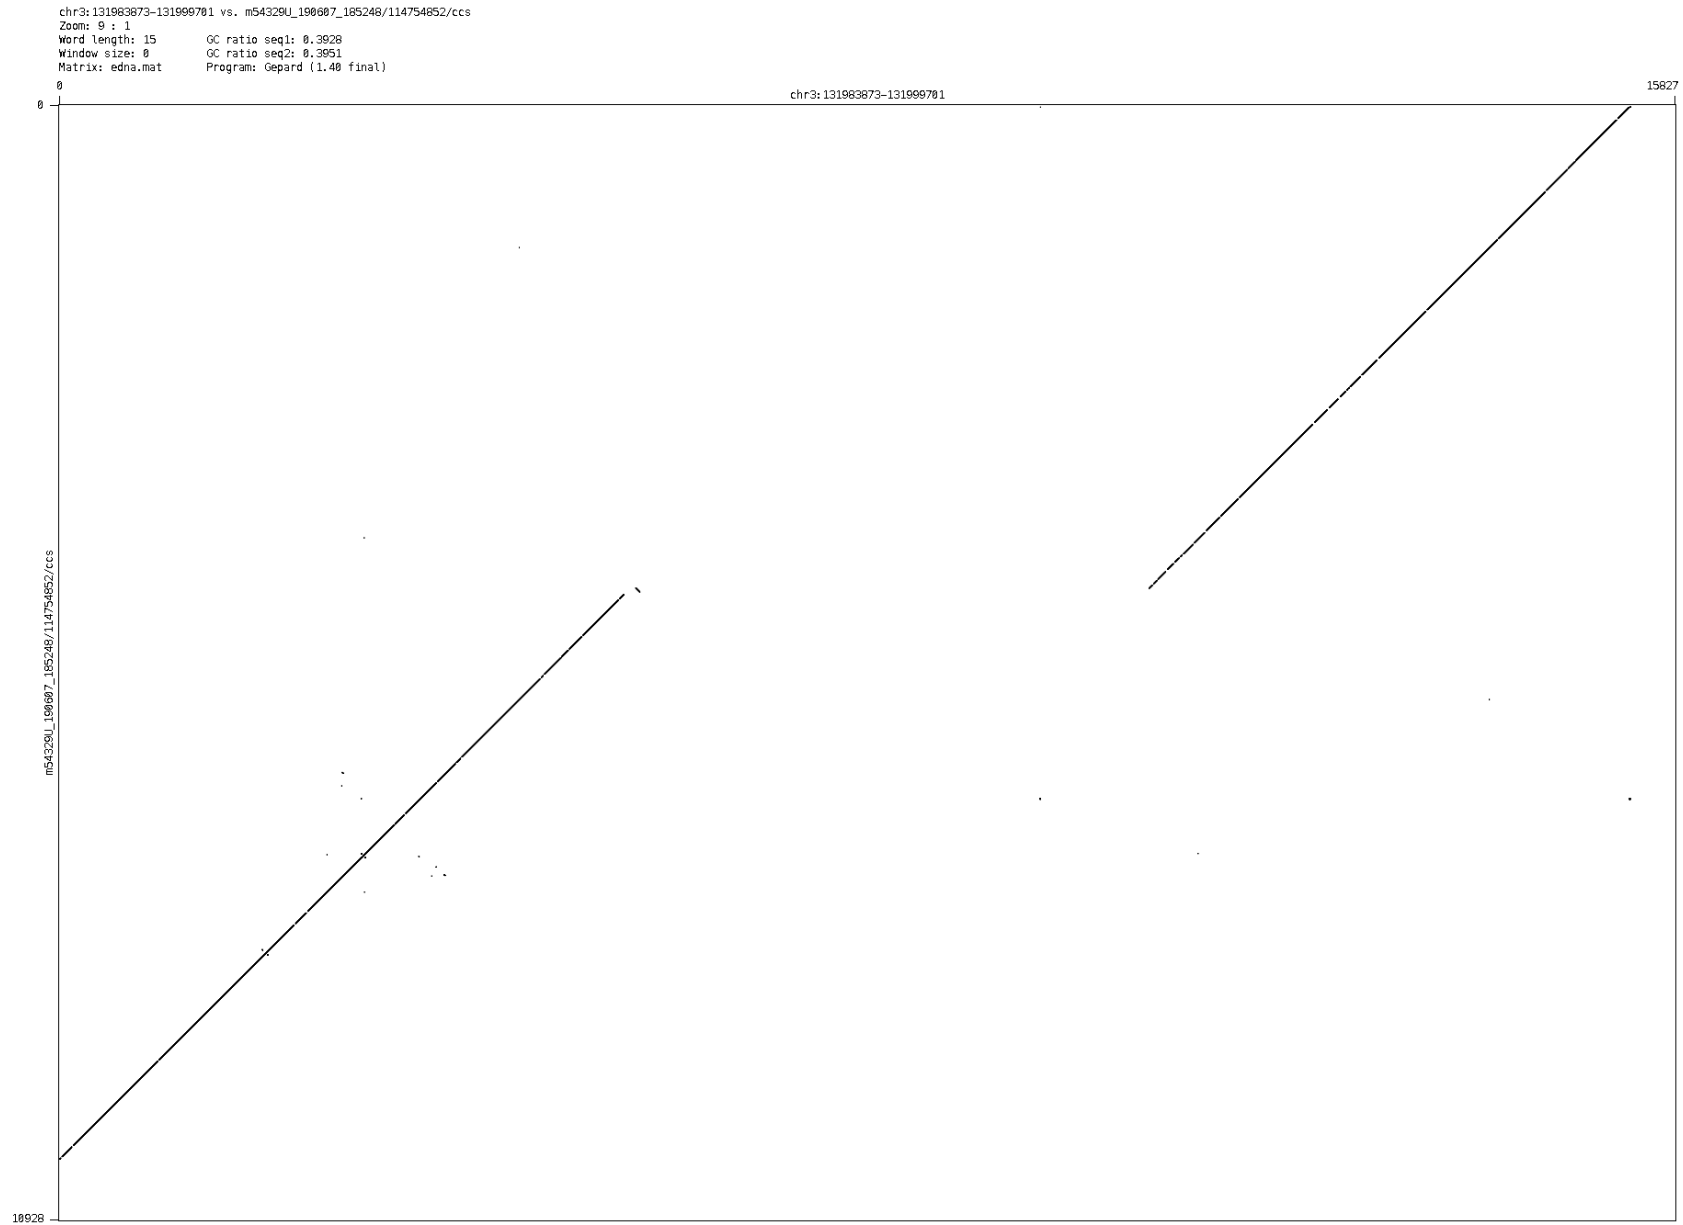

➤ chr3\_146667093\_146677284

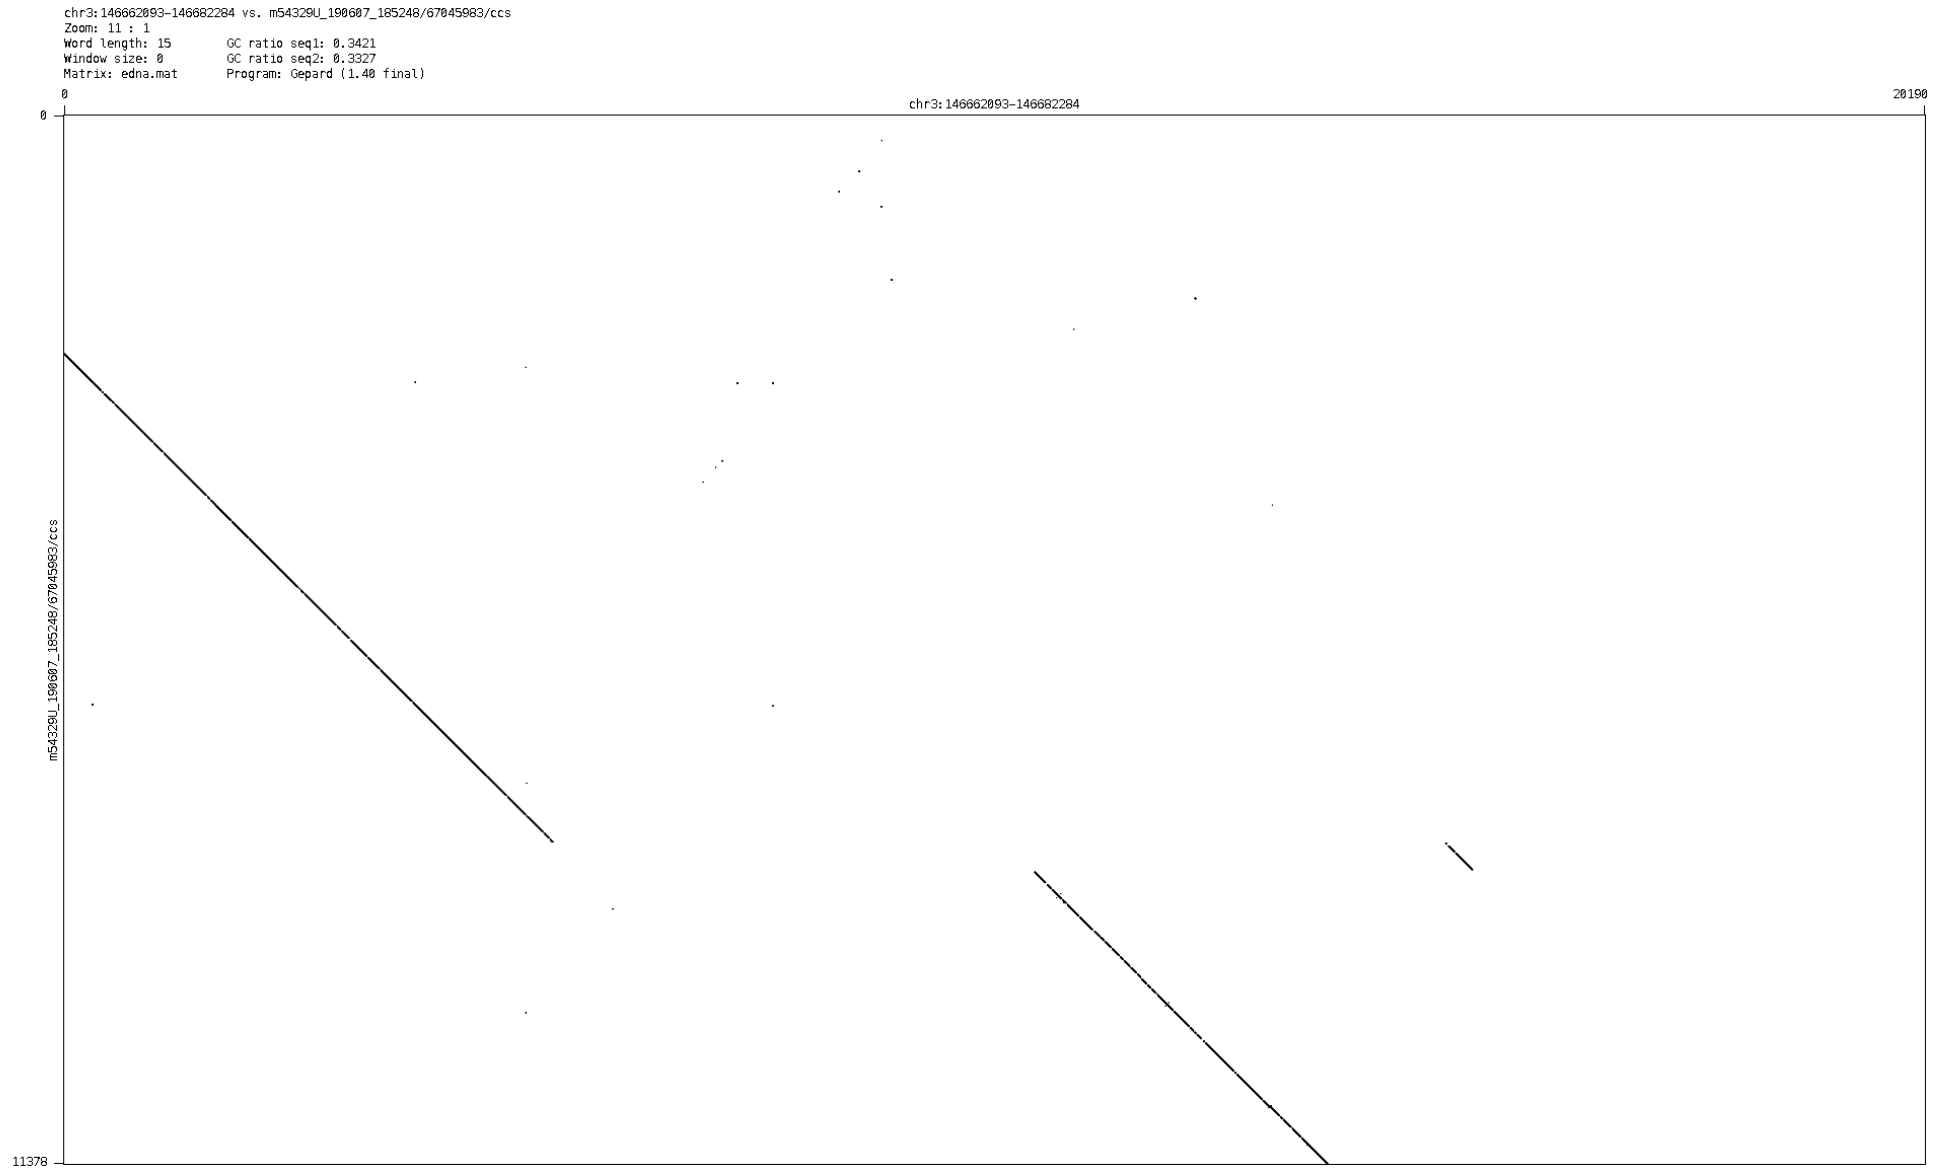

➤ chr3\_162807802\_162830163

chr3:162802802-162835163 vs. m54329U\_190615\_010947/135397459/ccs

Zoom: 18 : 1

Word length: 15

GC ratio seq1: 0.3564

Window size: 0

GC ratio seq2: 0.3664

Matrix: edna.mat

Program: Gepard (1.40 final)

0

chr3:162802802-162835163

32360

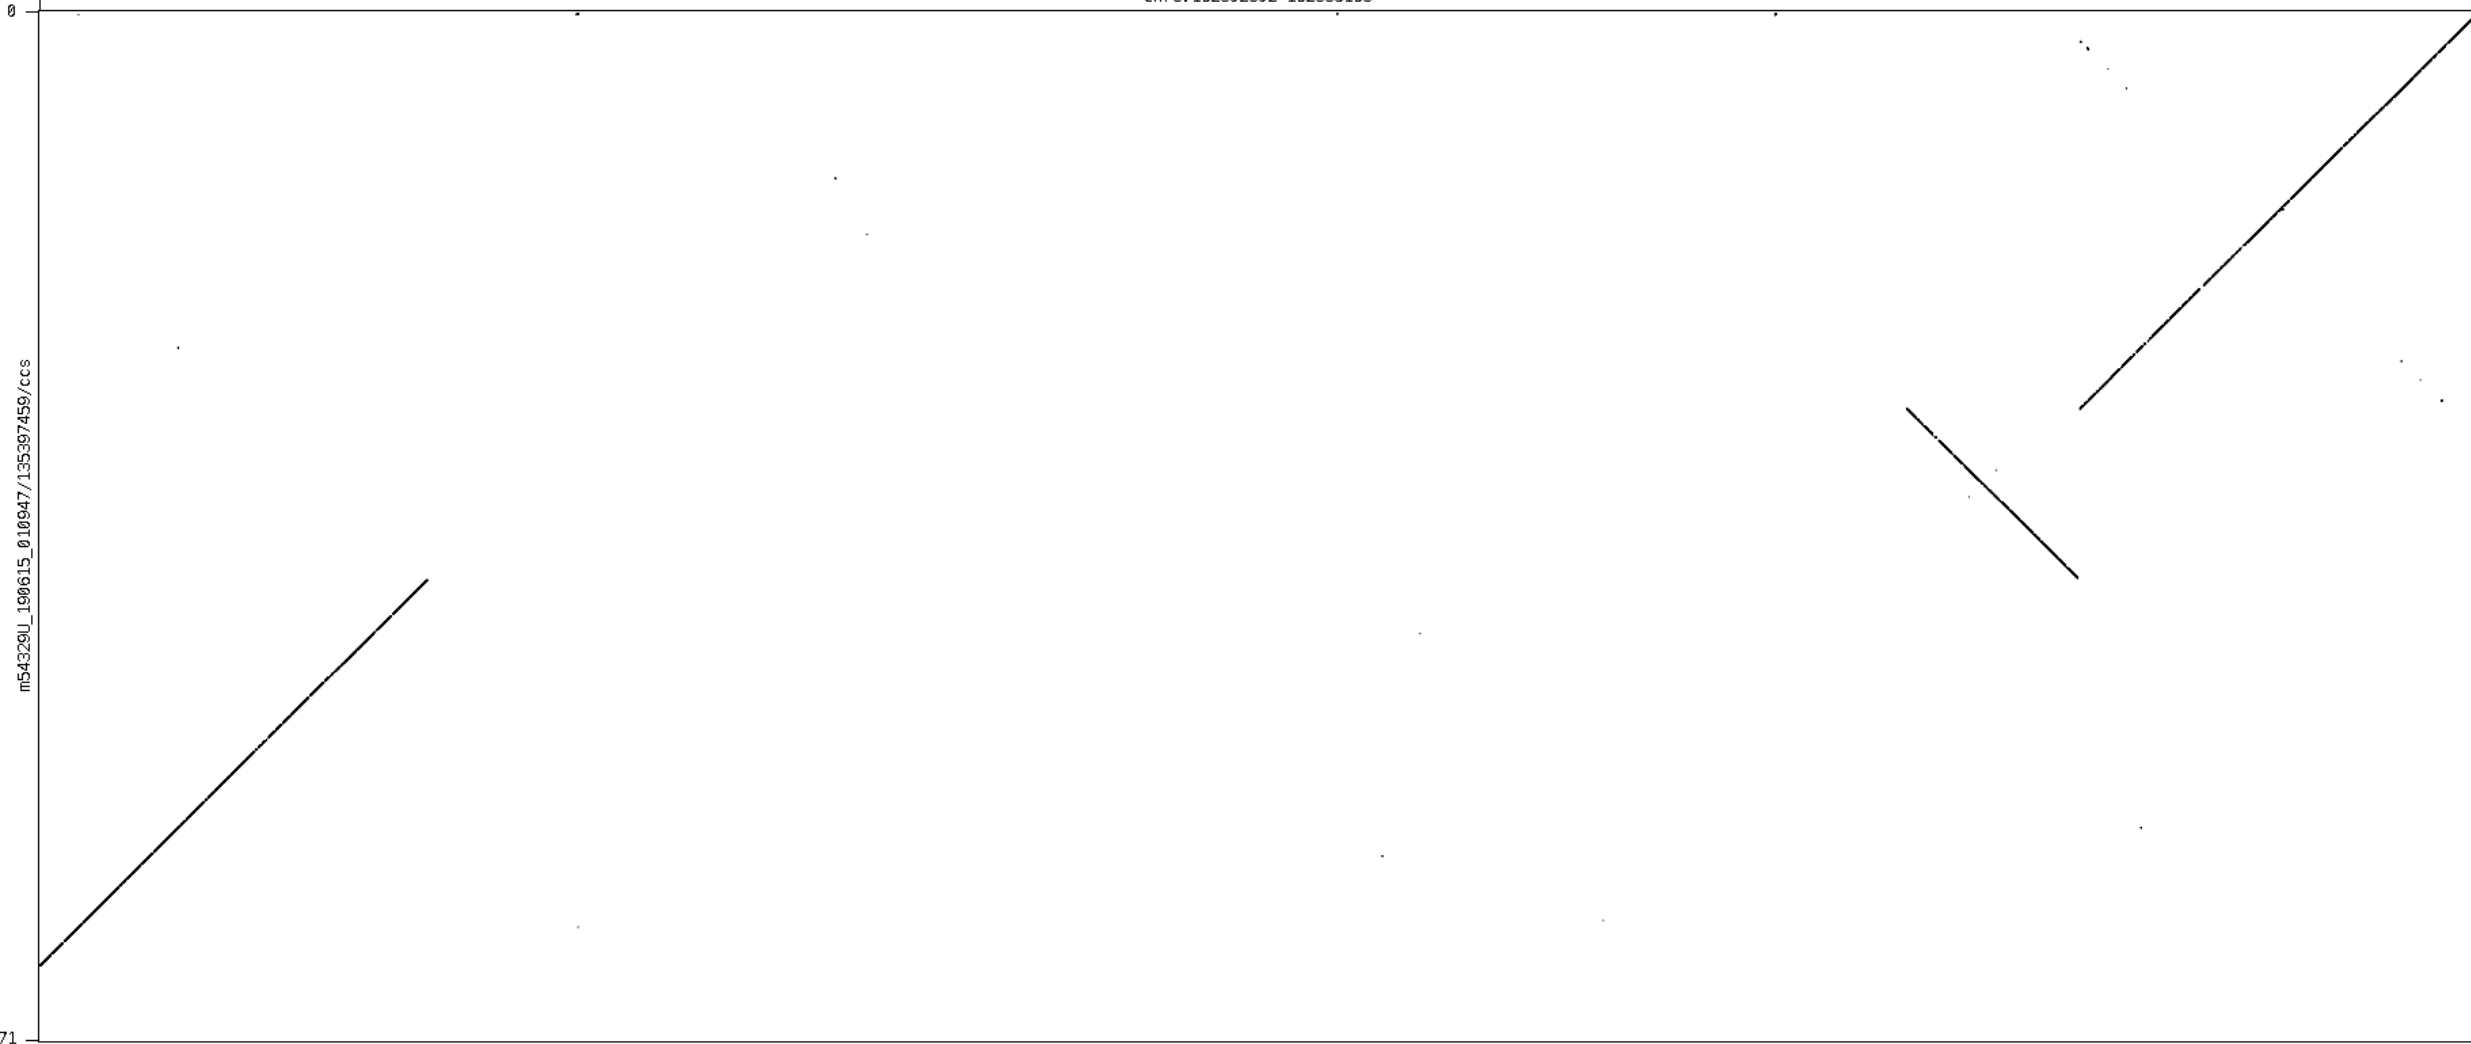

13671

➤ chr3\_178757959\_178758511

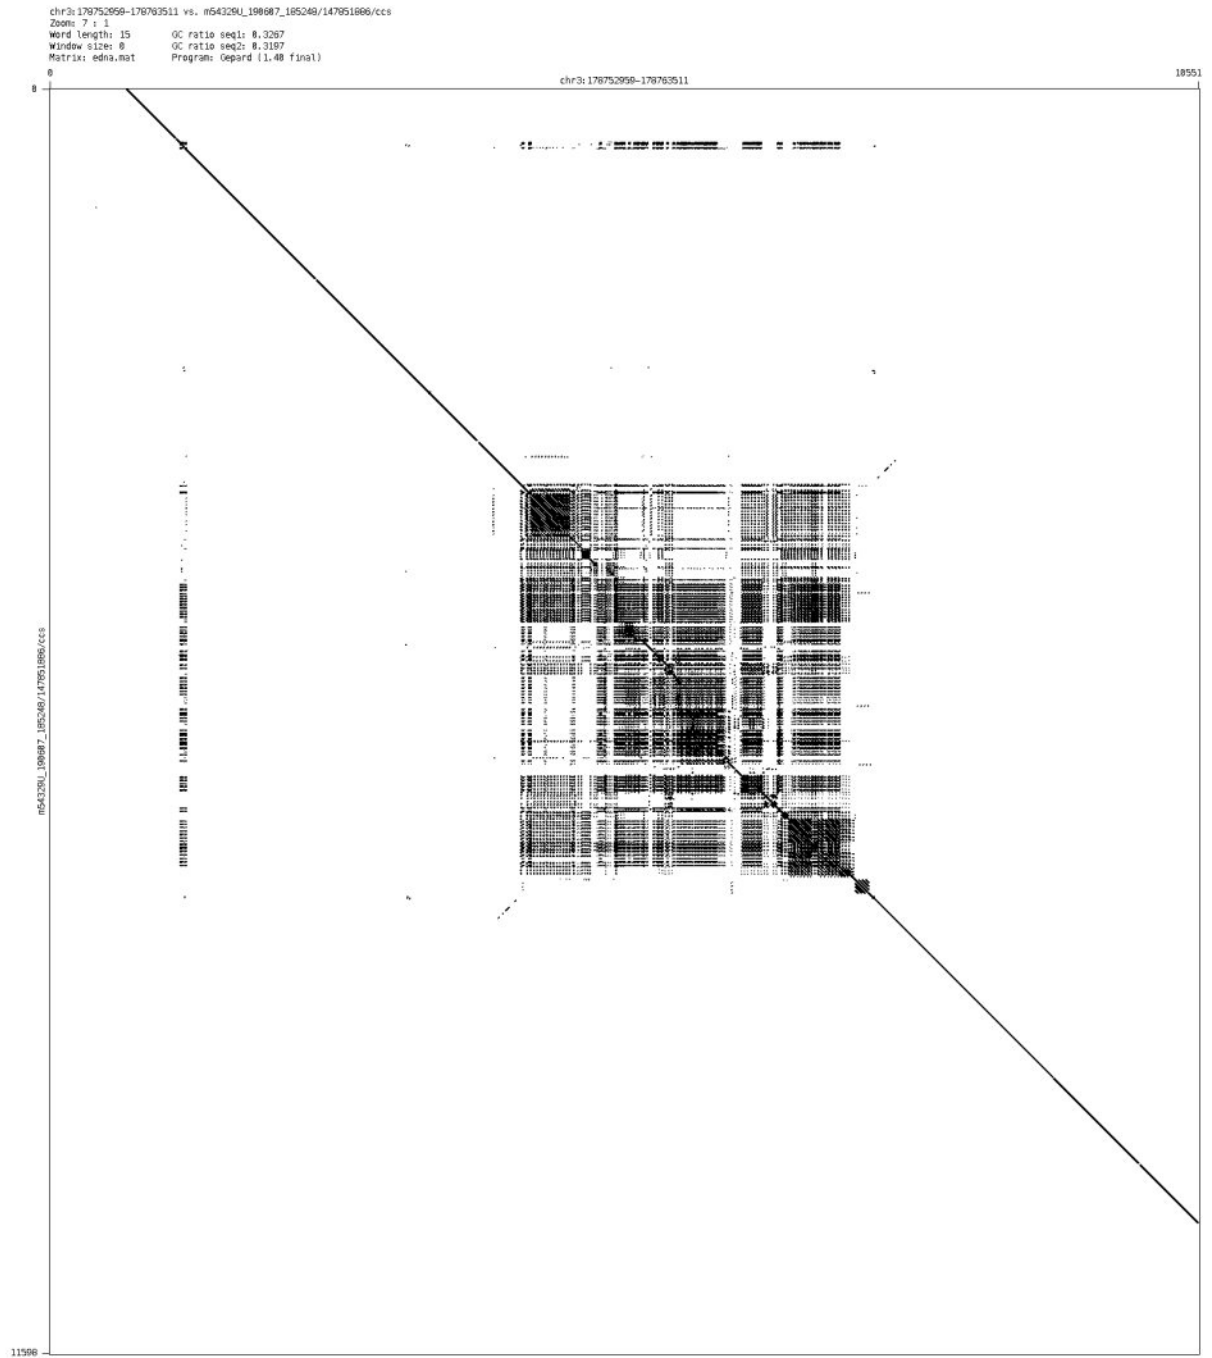

➤ chr3\_184754687\_184754818

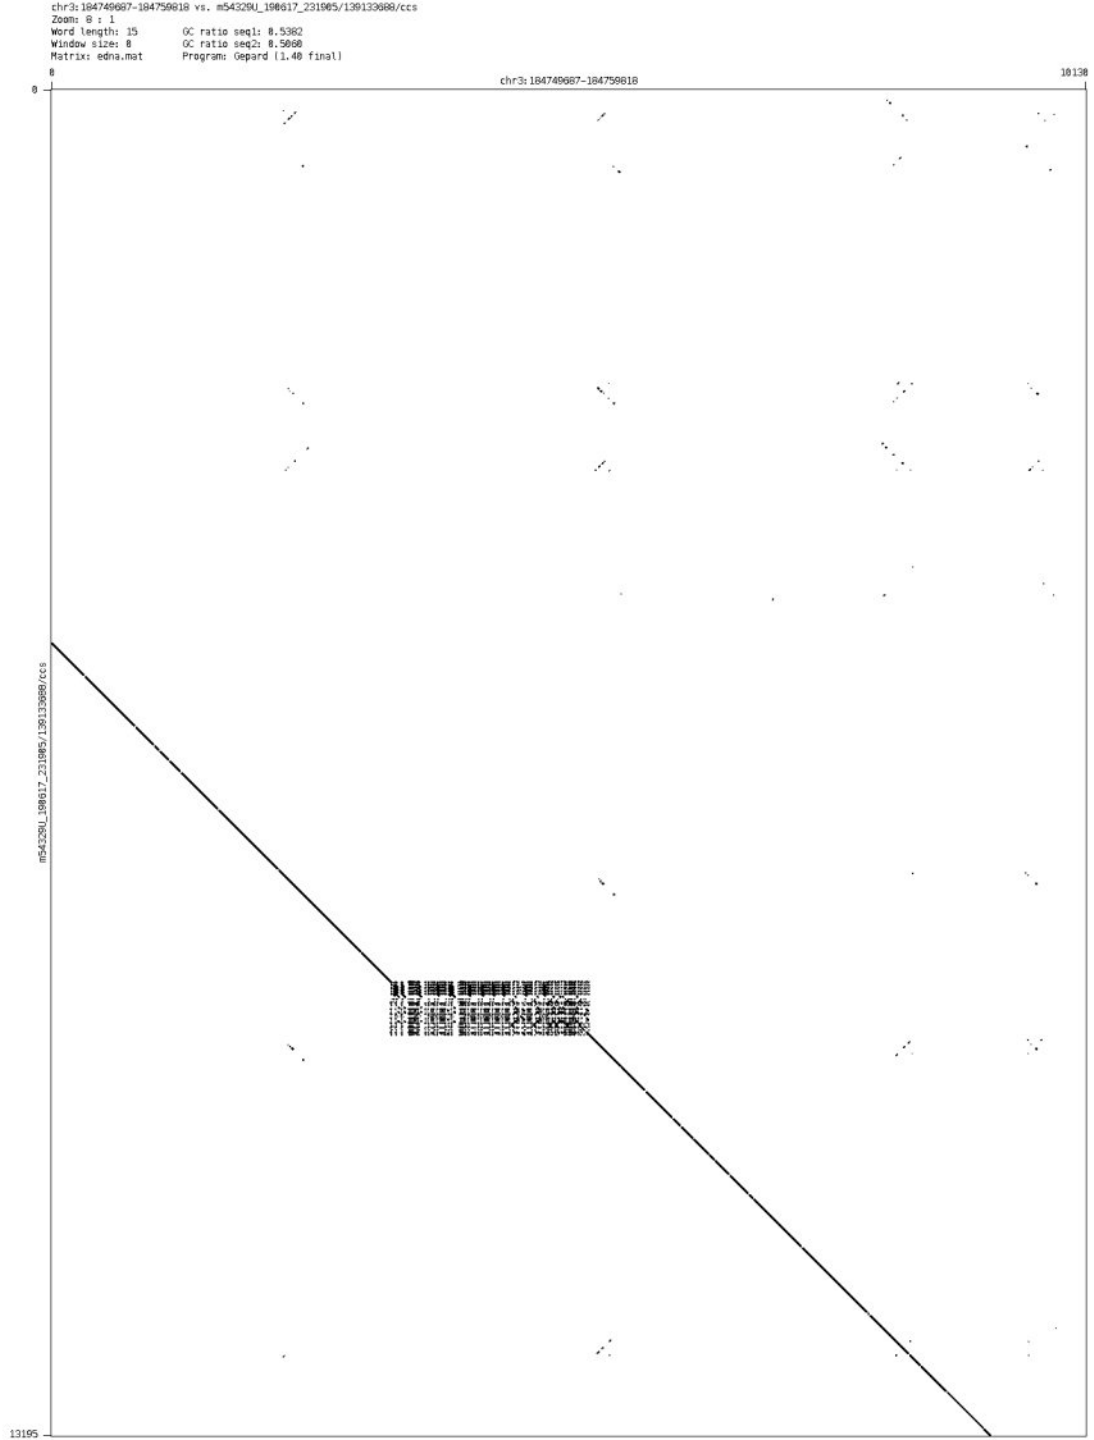

➤ chr3\_194324598\_194324699

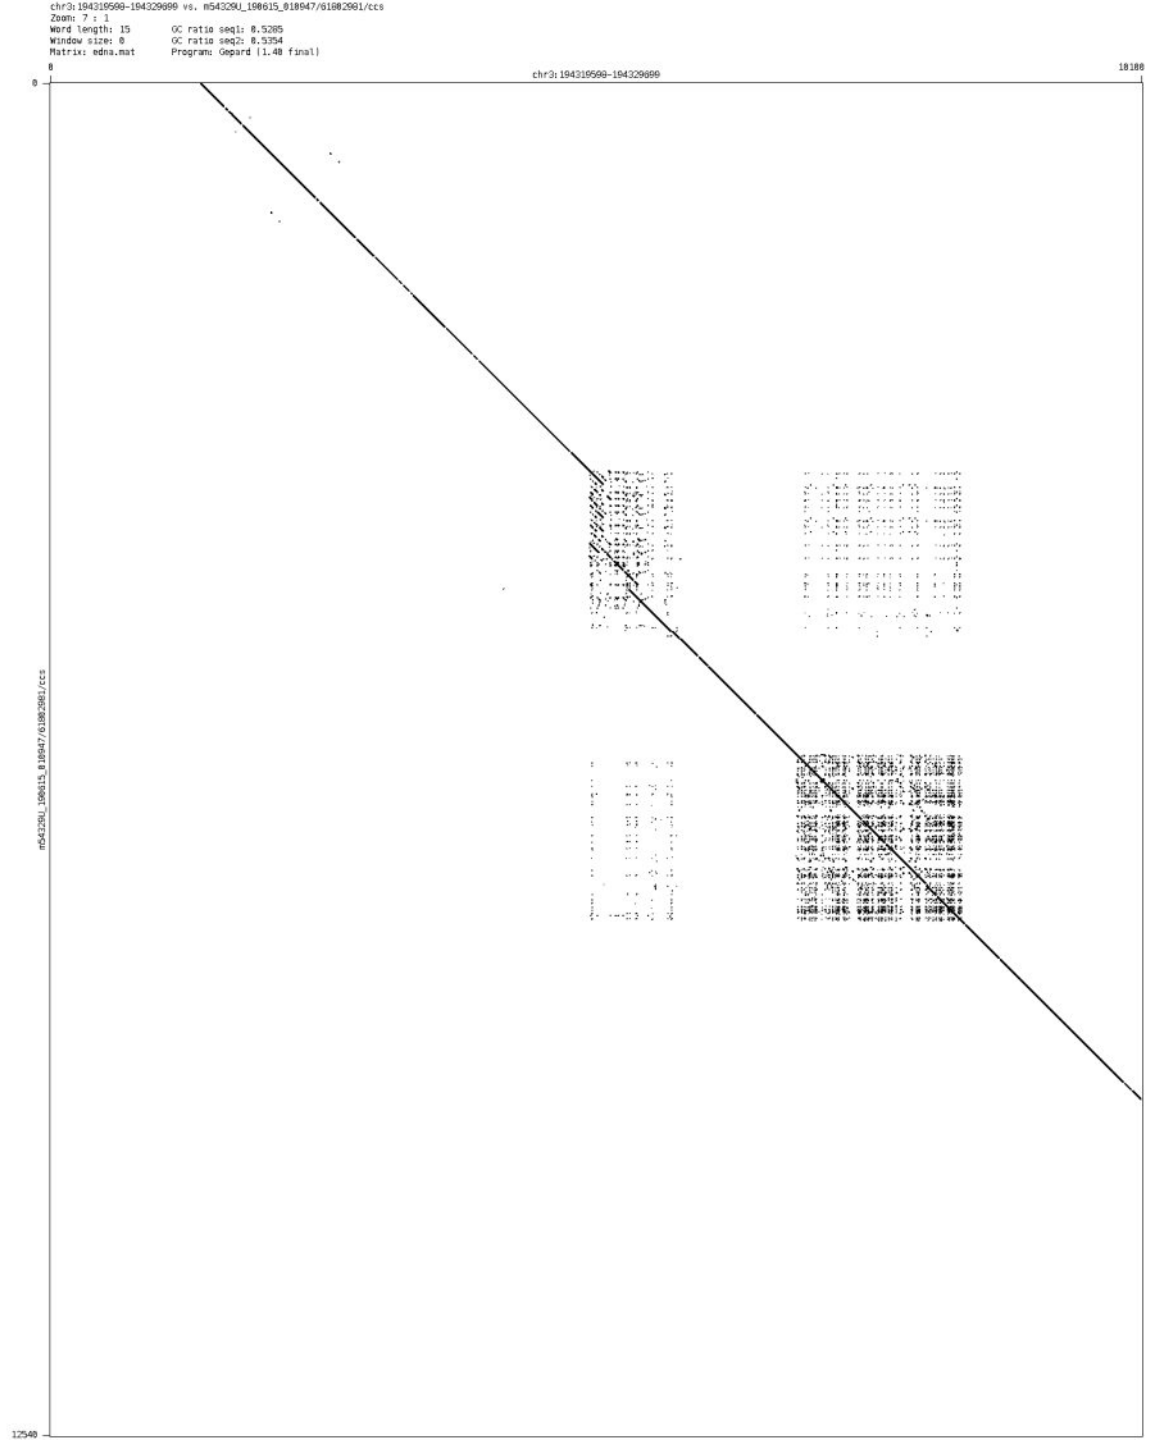



➤ chr3\_195055517\_195059786

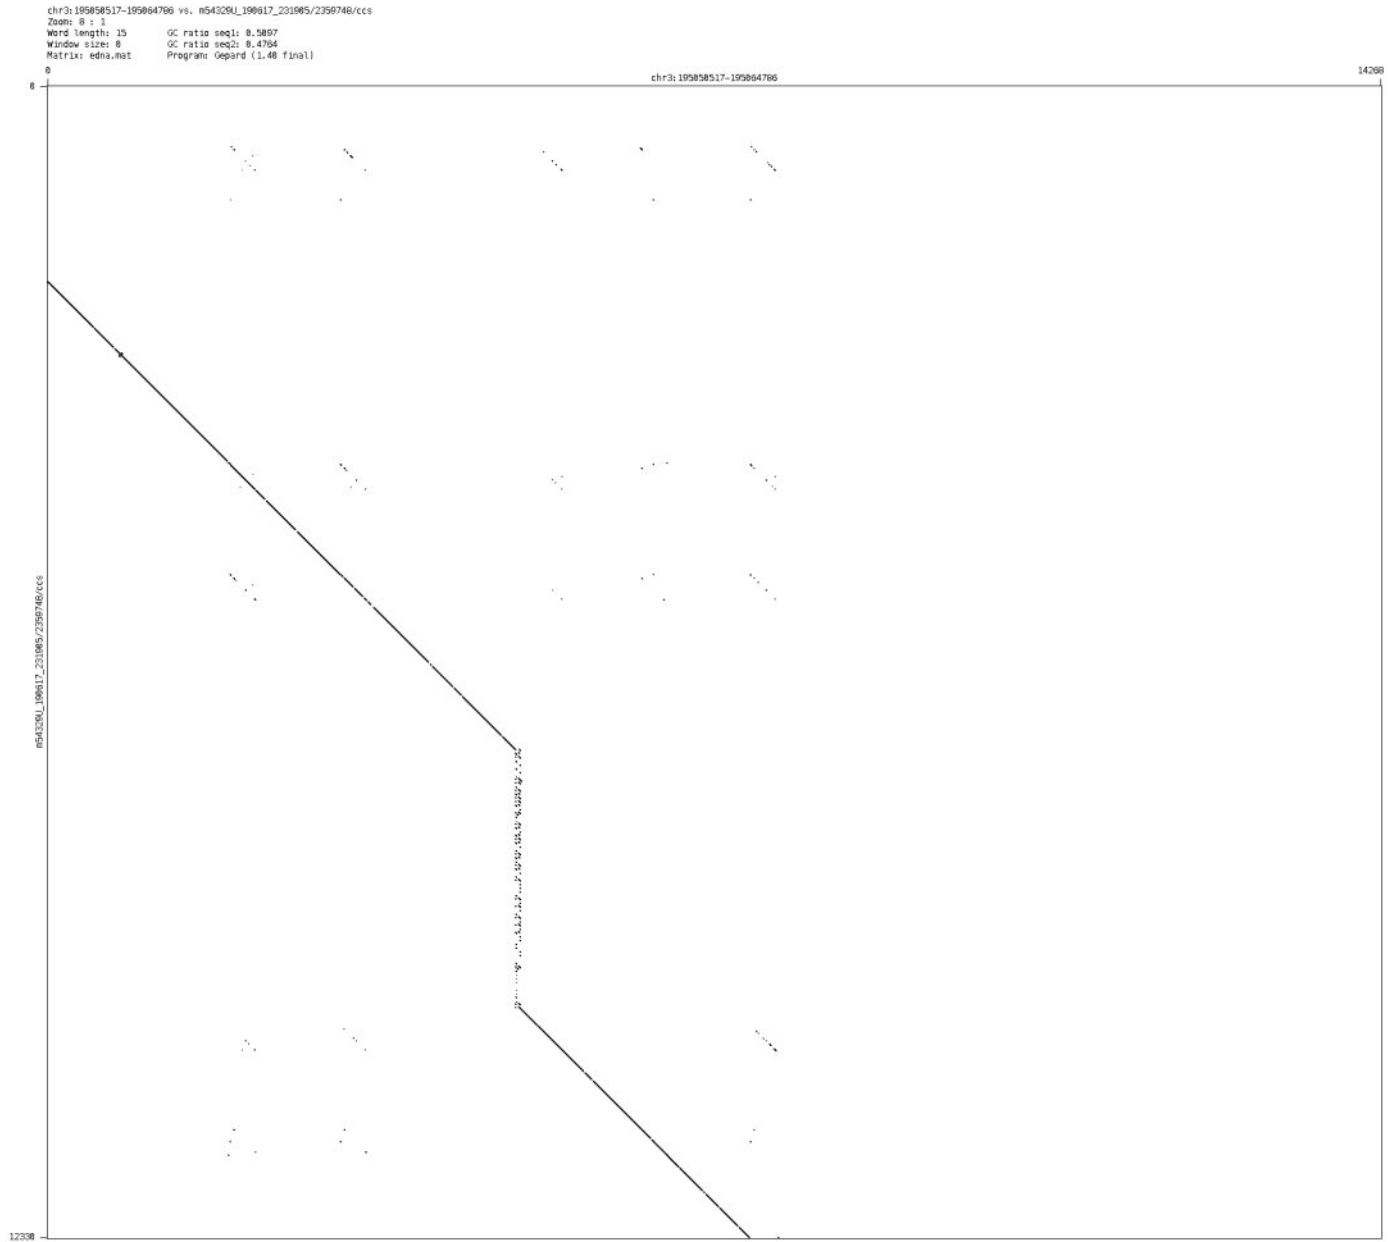

➤ chr3\_197390213\_197391660

chr3:197395213-197396989 vs. n543291.199615\_818947/9843727/ccc  
Zoom: 0 : 1 GC ratio seq1: 0.4261  
word length: 15 GC ratio seq2: 0.4682  
Window size: 8  
Matrix: edna.mat Program: Gepard (1.46 final)

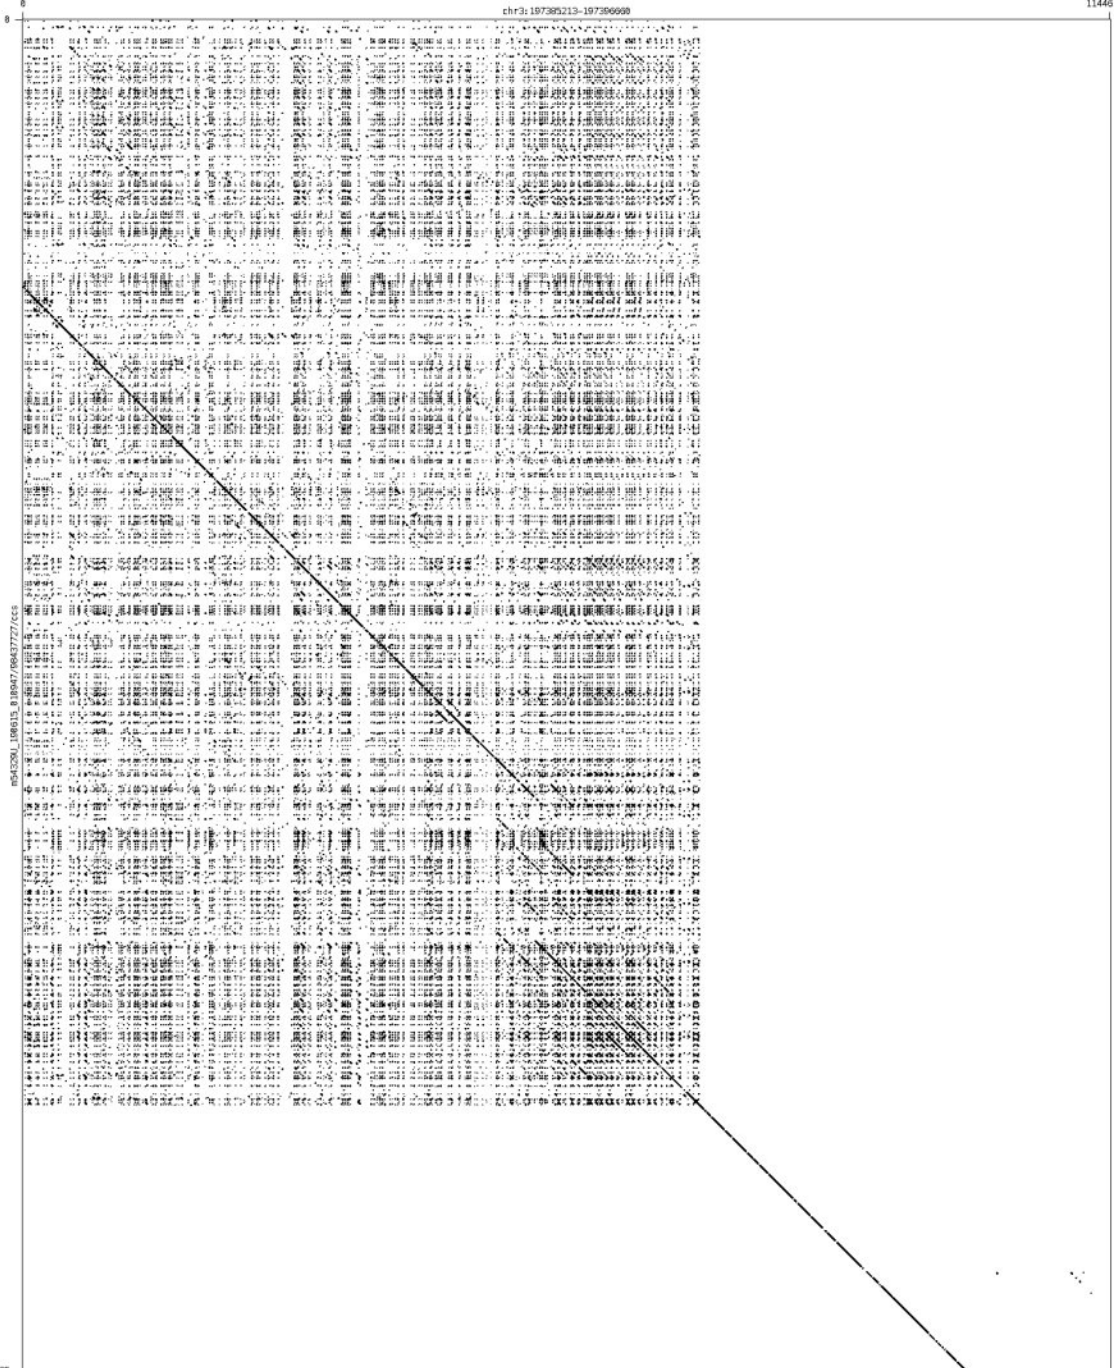

➤ chr3\_197459802\_197459965

chr3:197454982-197464965 vs. n54328L\_198617\_231985/64227482/ccs  
Zoom: 8 : 1  
Word length: 15 GC ratio seq1: 0.4984  
Window size: 8 GC ratio seq2: 0.4758  
Matrix: edna.mat Program: cephad (1.48 final)  
8

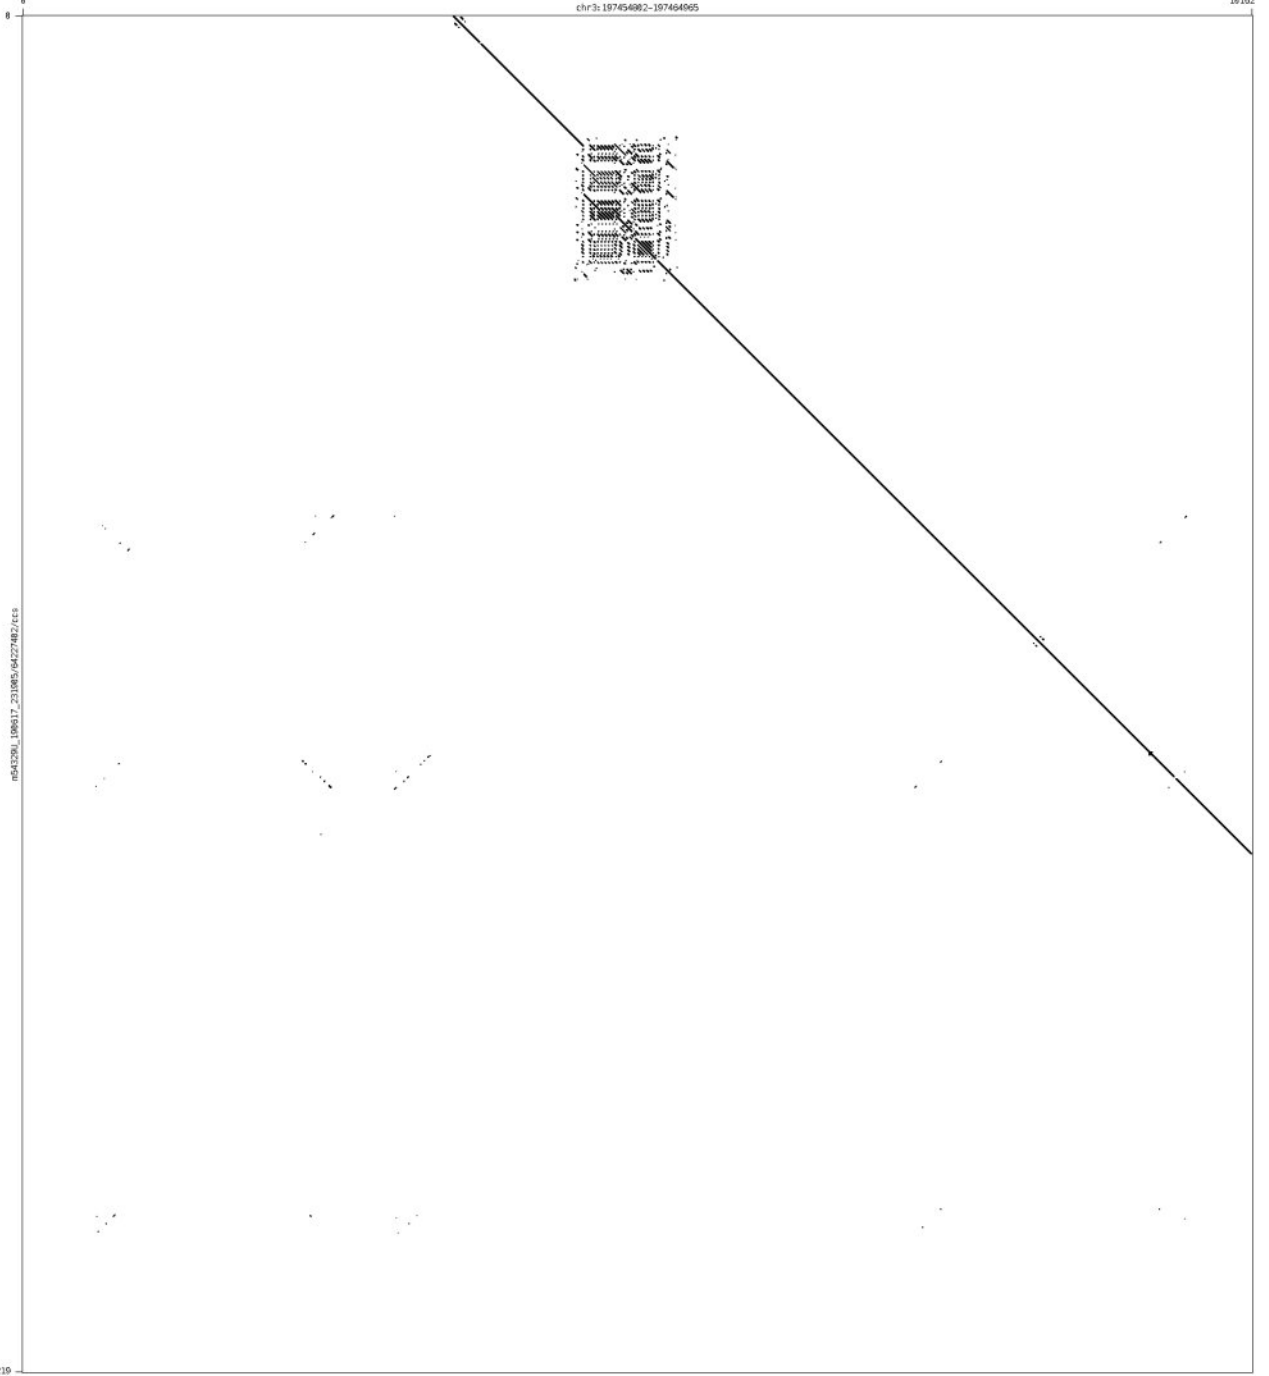

➤ chr4\_555182\_555337

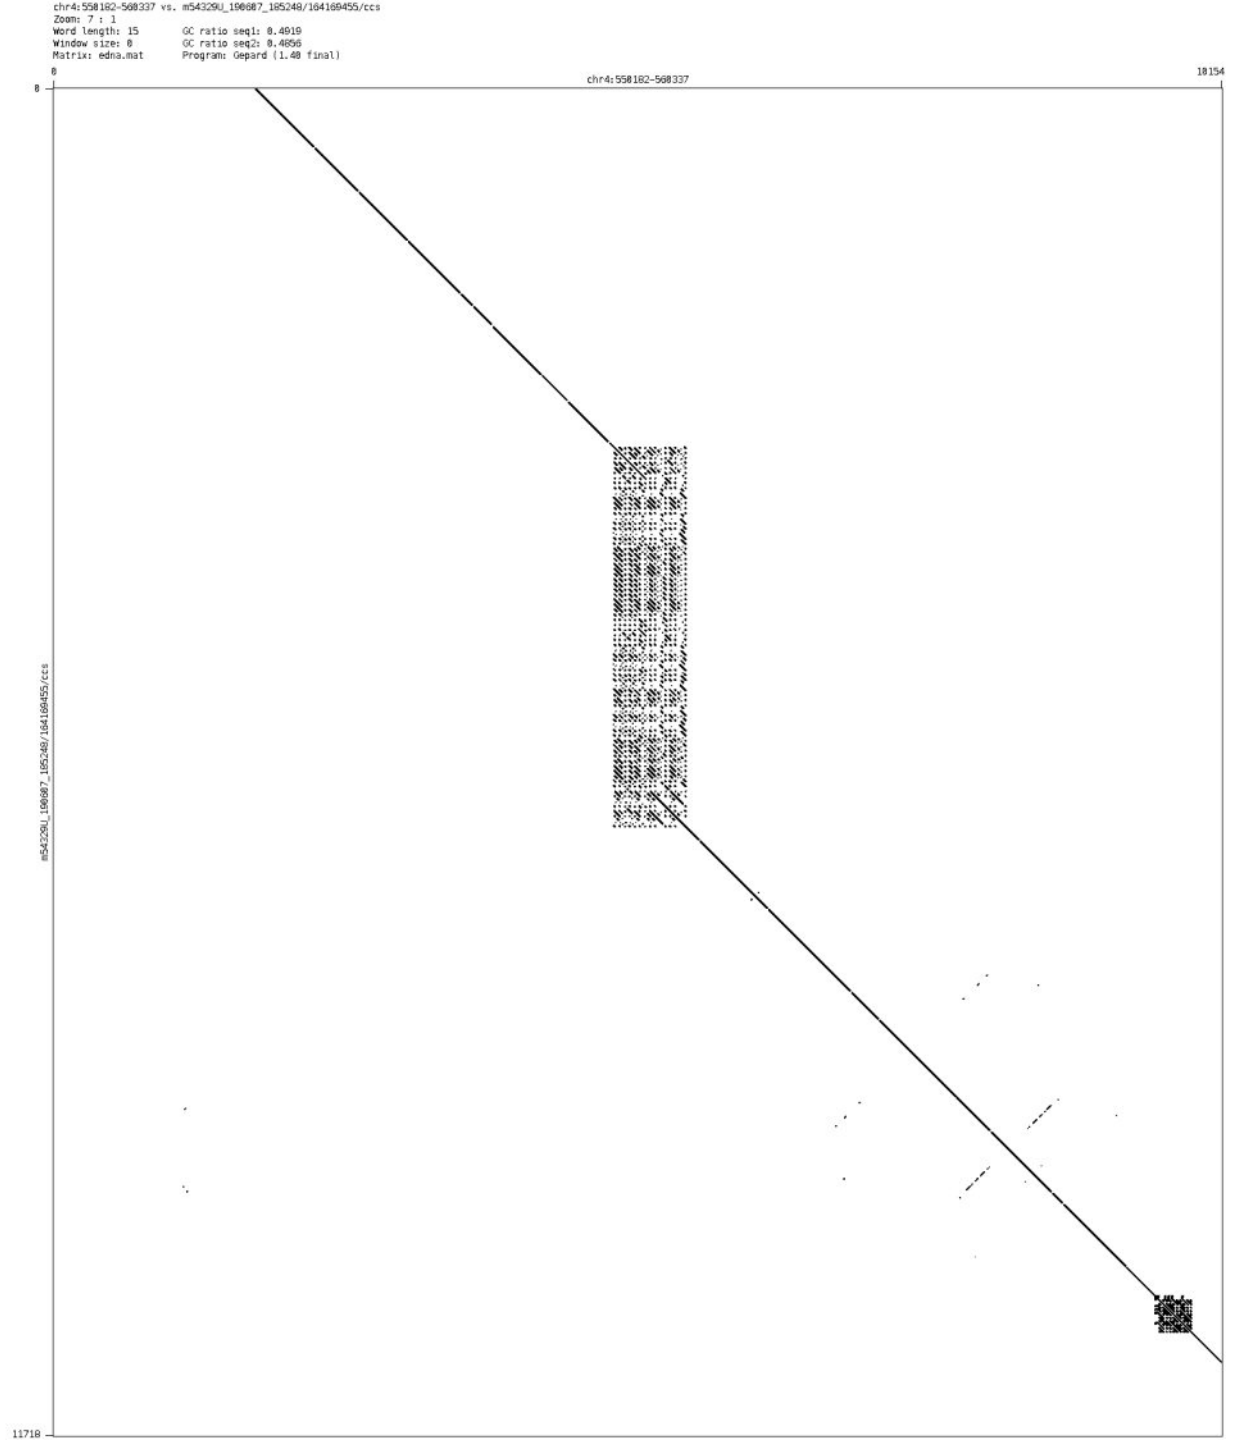

➤ chr4\_1046301\_1046664

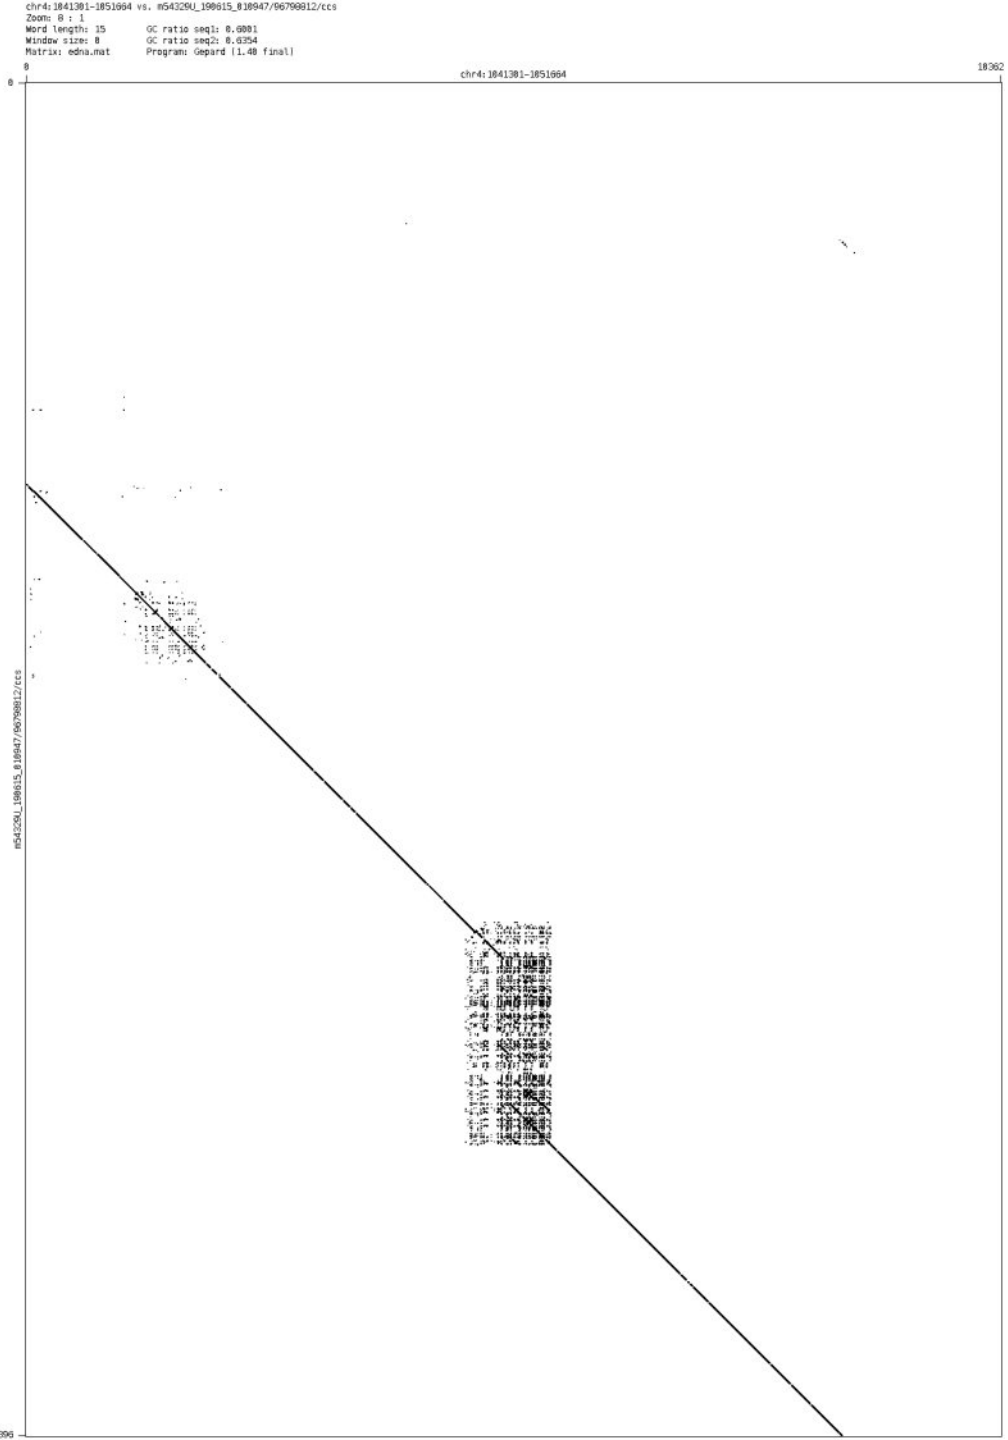

➤ chr4\_1372721\_1372812

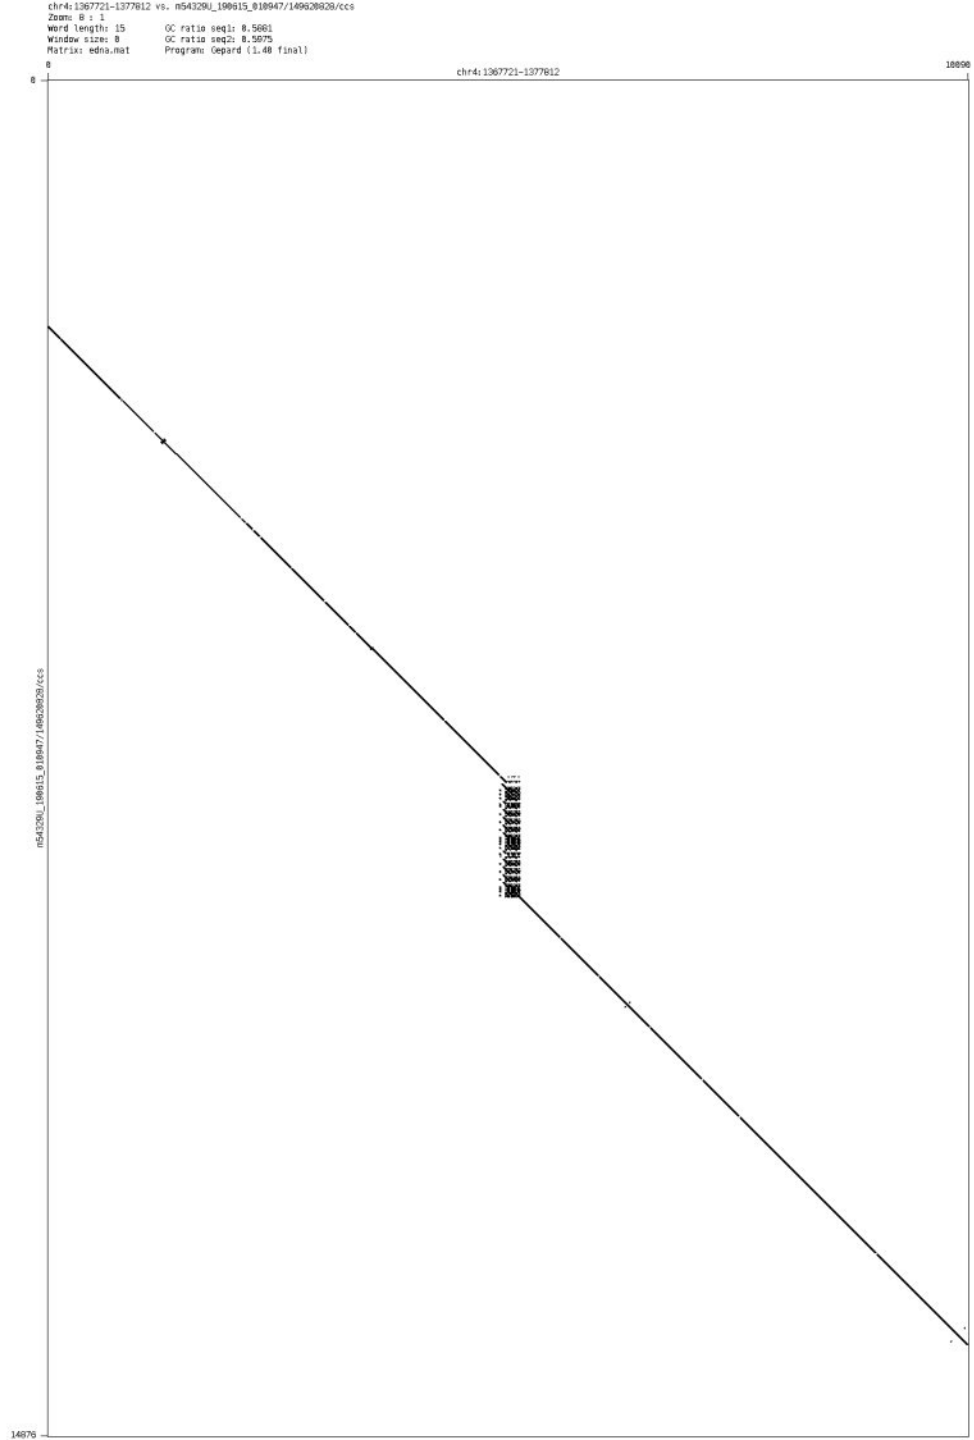

➤ chr4\_3814944\_3815102

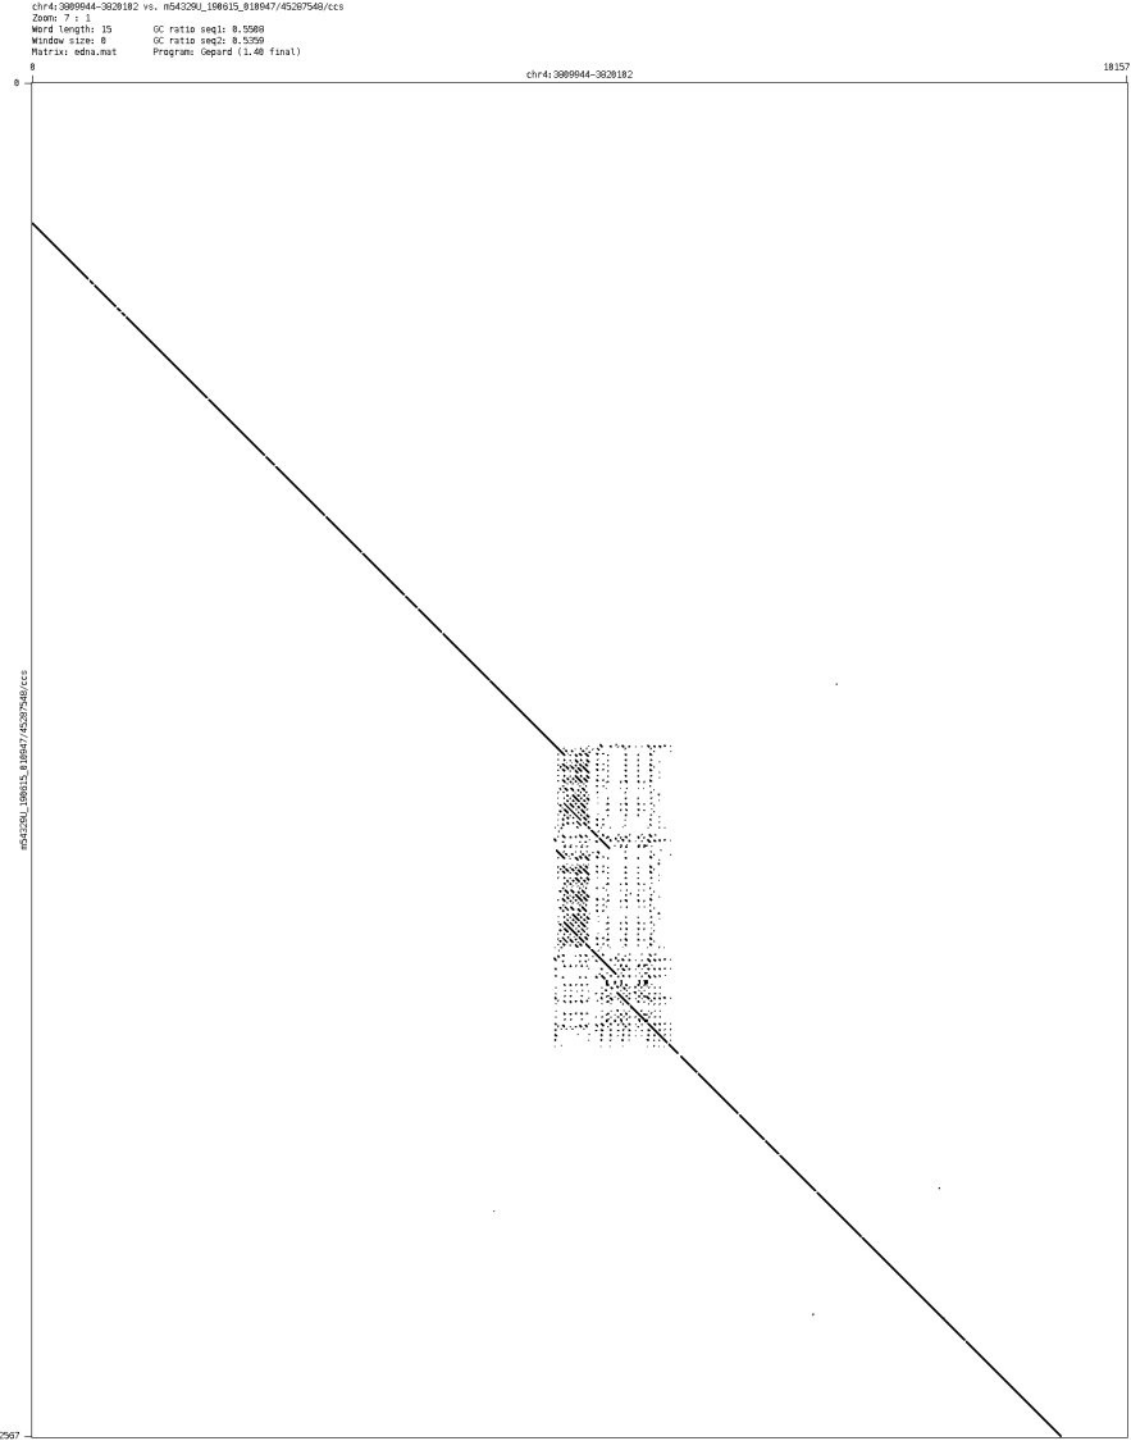

➤ chr4\_6003932\_6004226

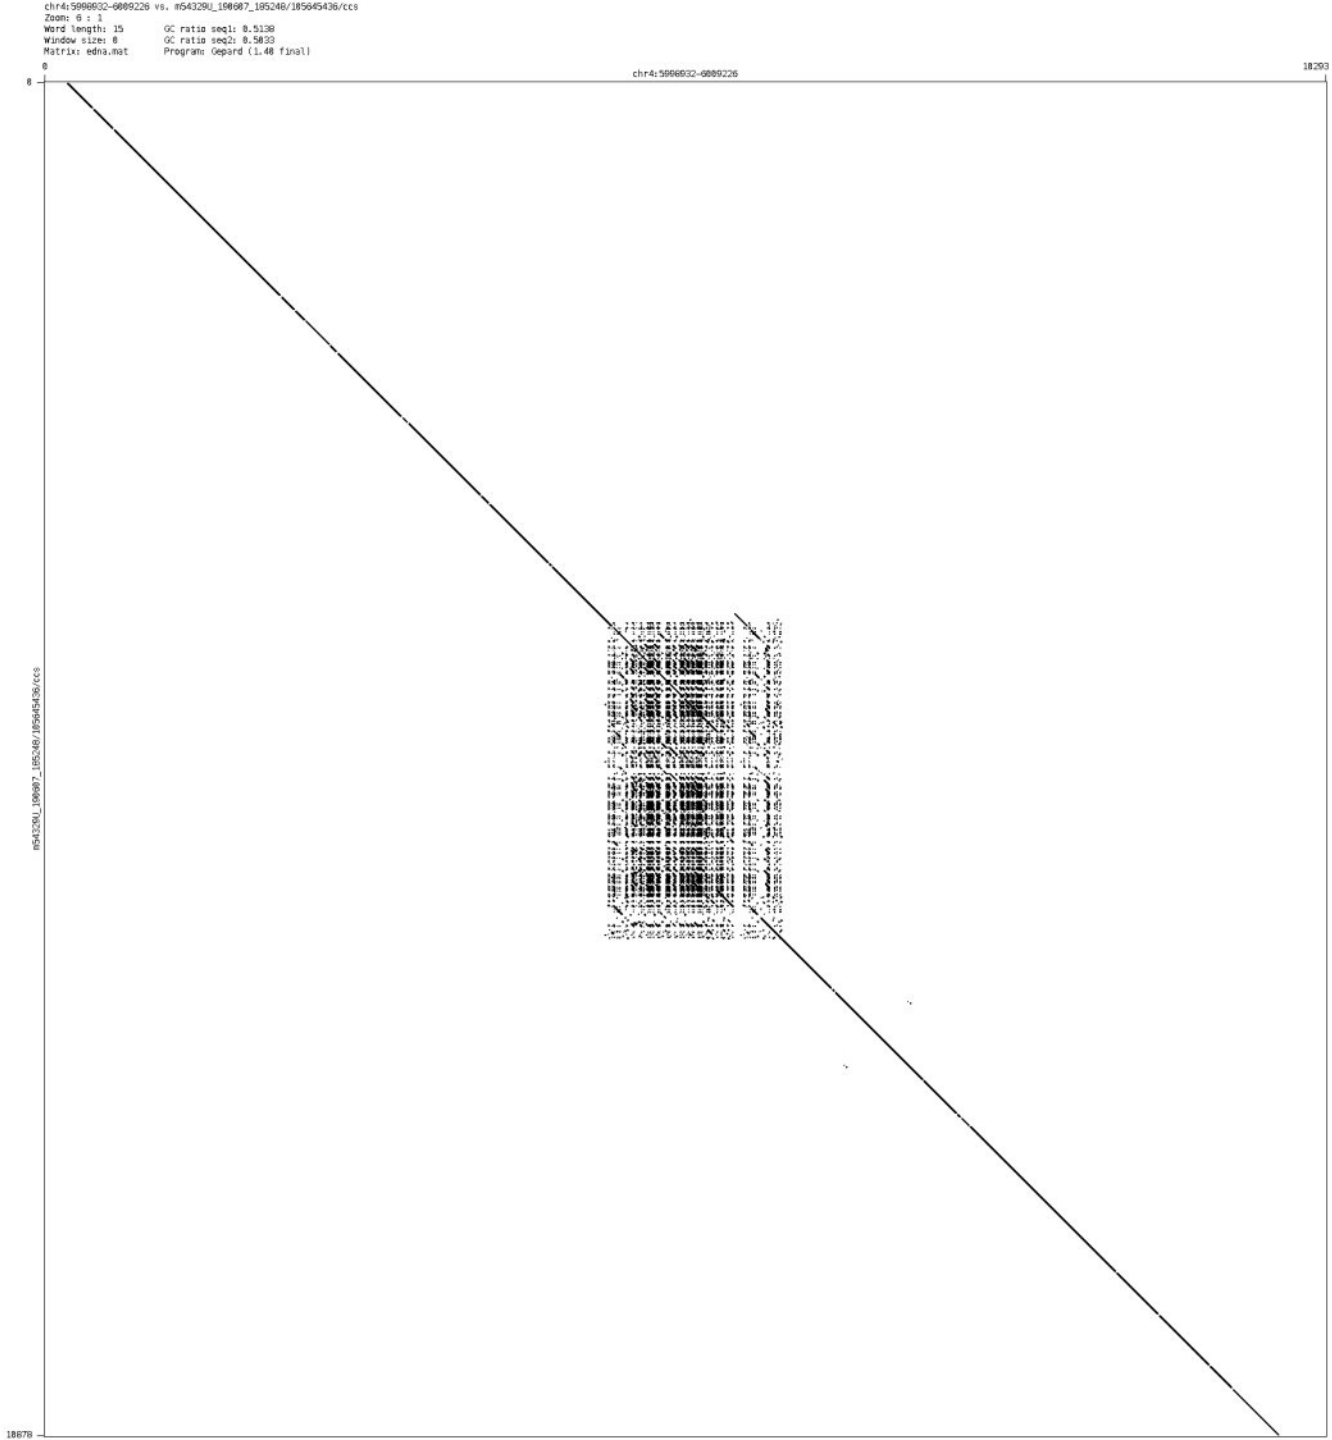



➤ chr4\_7695588\_7695671

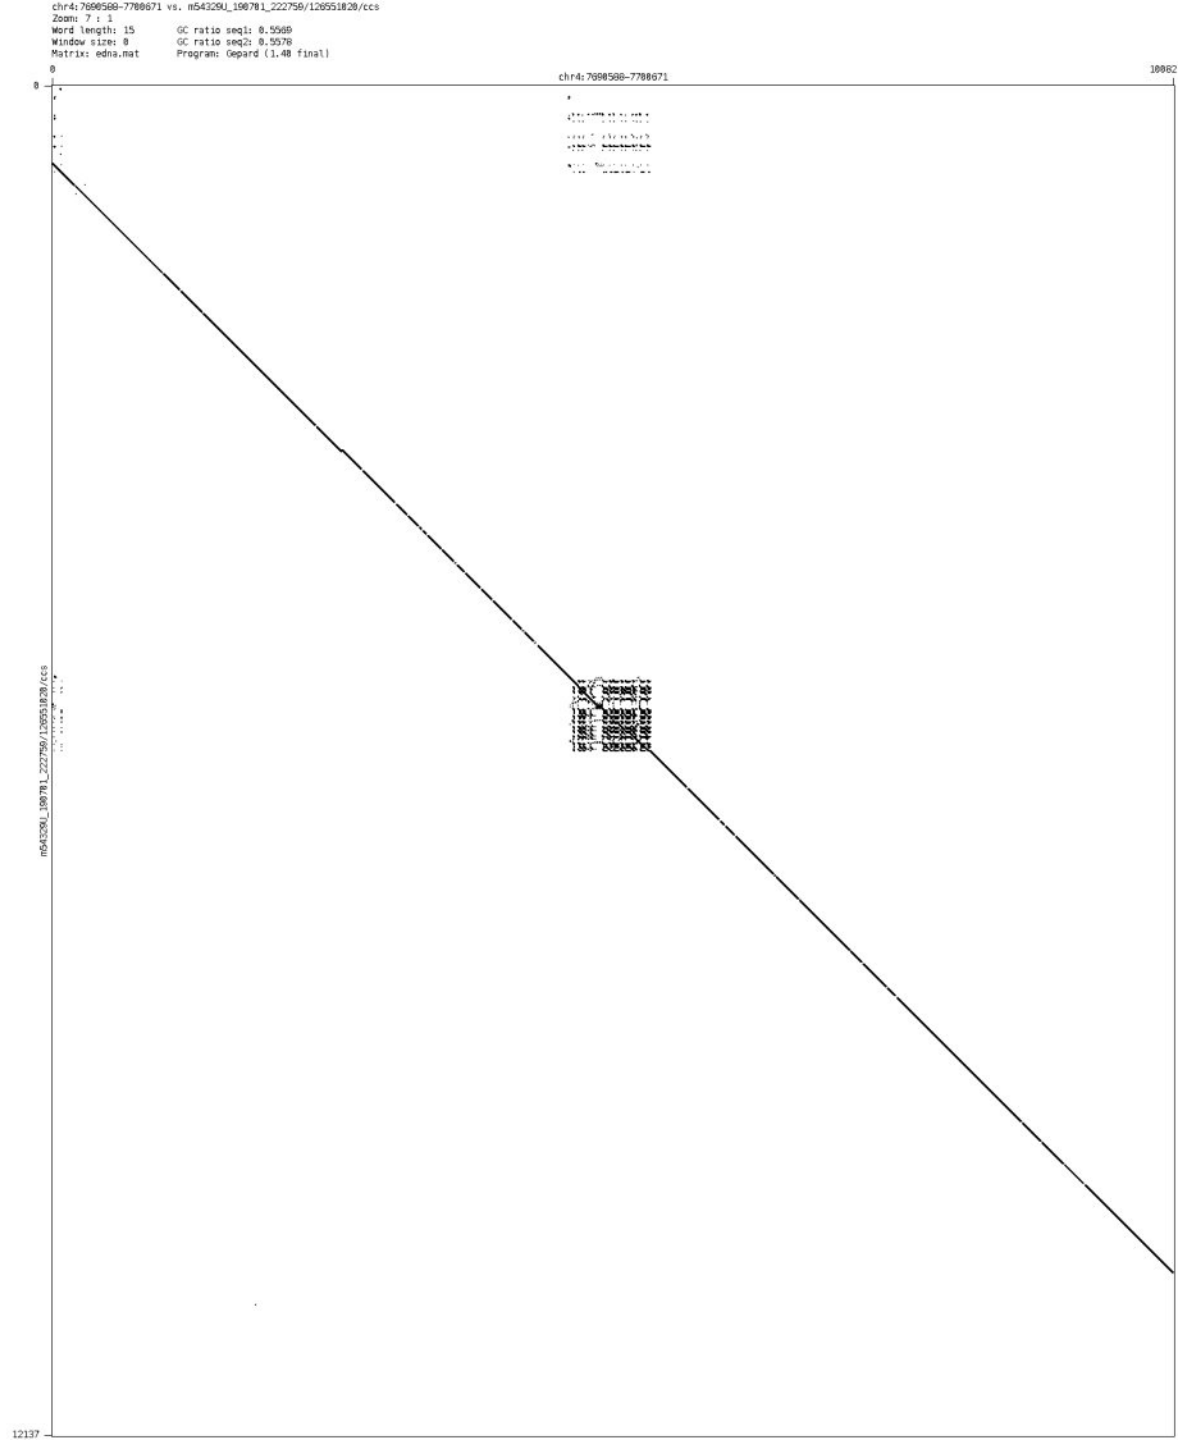

➤ chr4\_12648458\_12648926

chr4:12643458-12653626 vs. m543291\_196687\_185248/178461488/ccs  
Zoom: 0 : 1  
Word length: 15 GC ratio seq1: 0.3715  
Window size: 0 GC ratio seq2: 0.3591  
Matrix: edna.mat Program: Gepard (1.48 final)

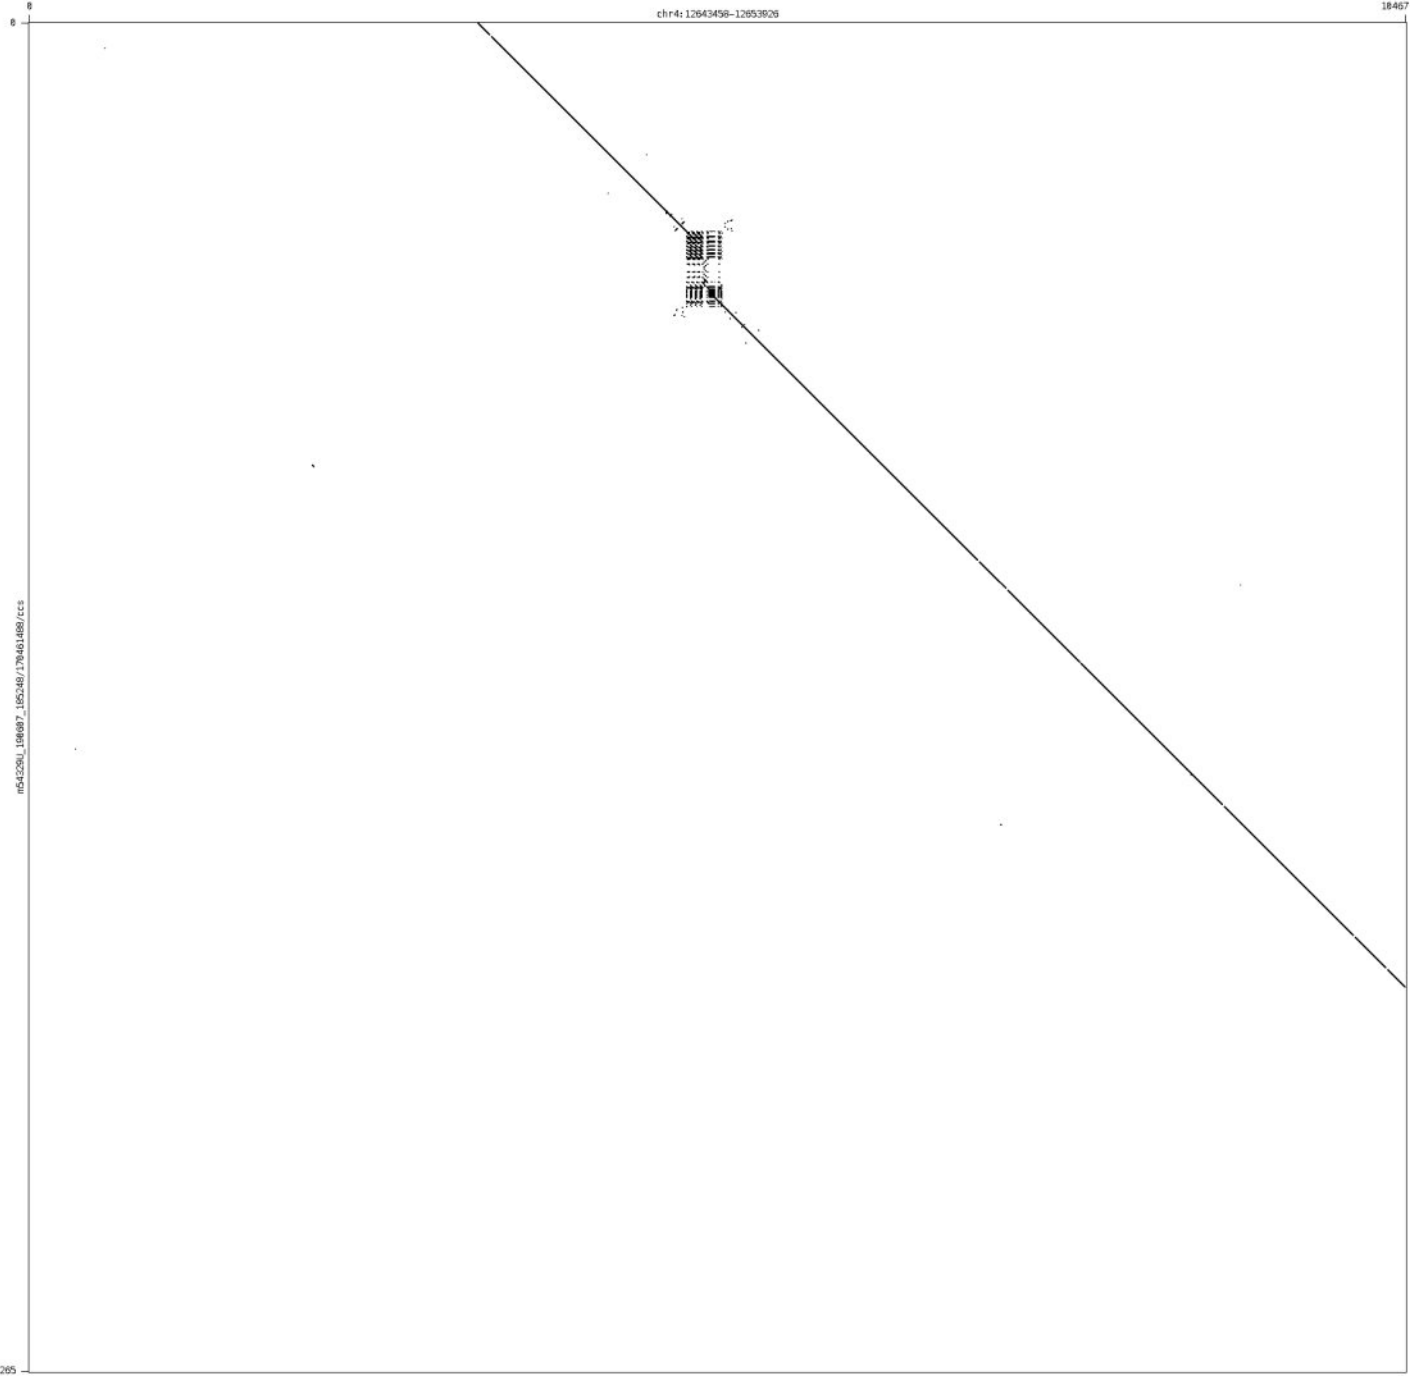

➤ chr4\_37585251\_37585395

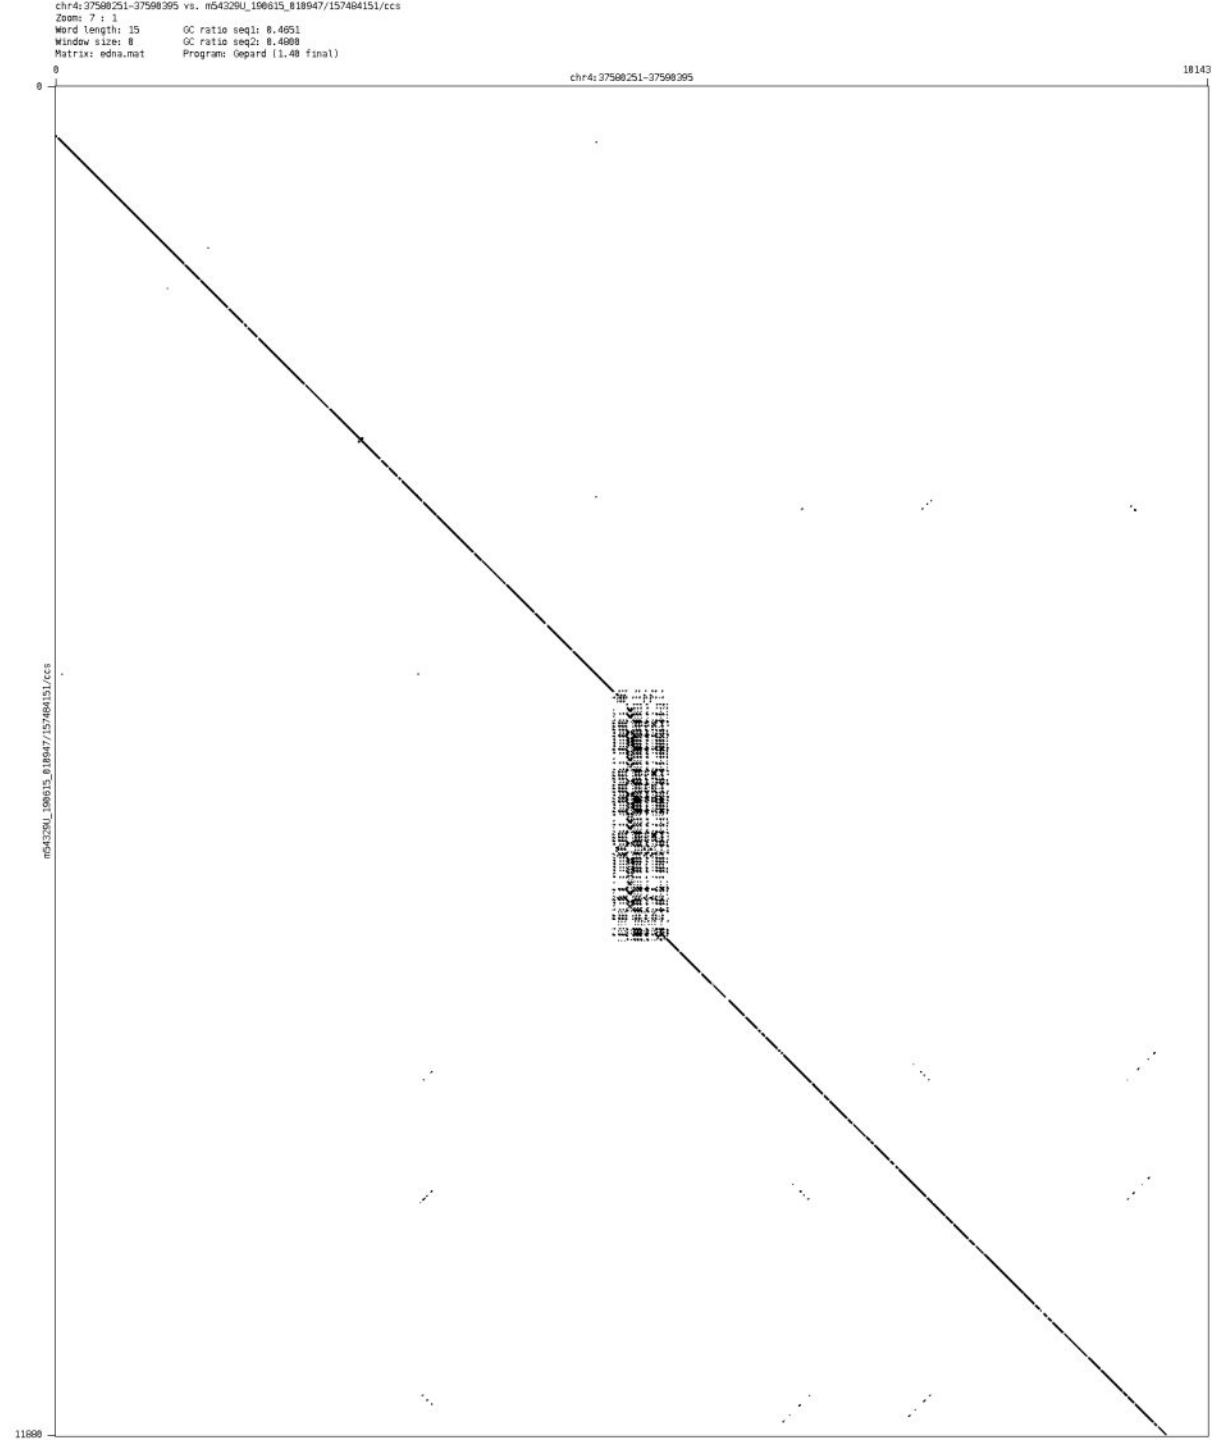

➤ chr4\_40295148\_40295512

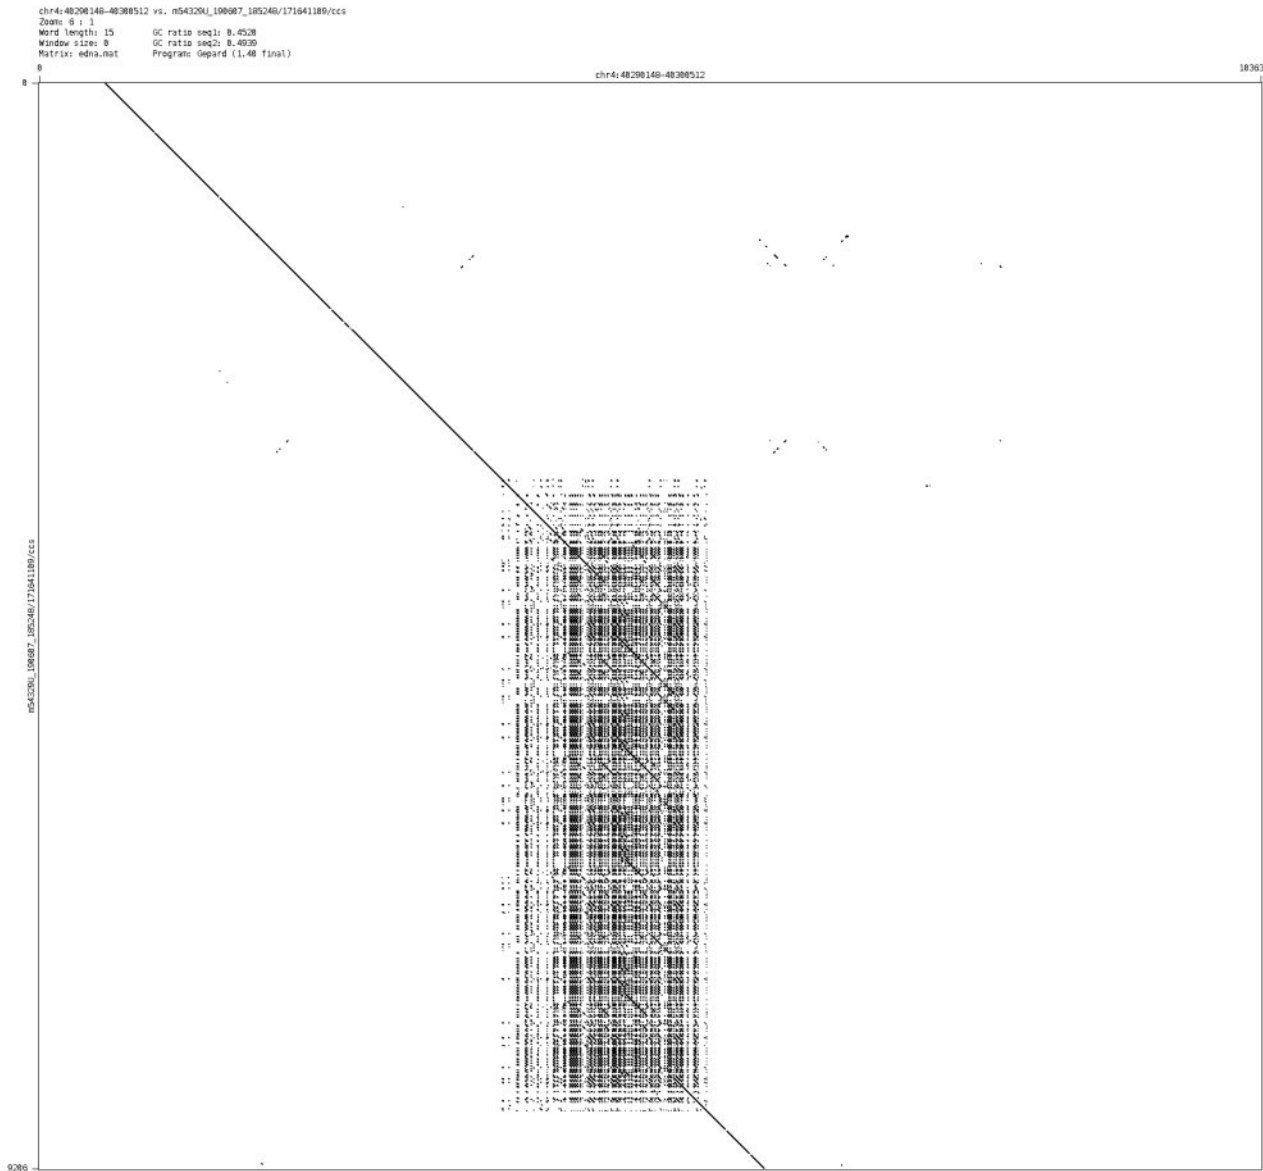

➤ chr4\_45024776\_45026675

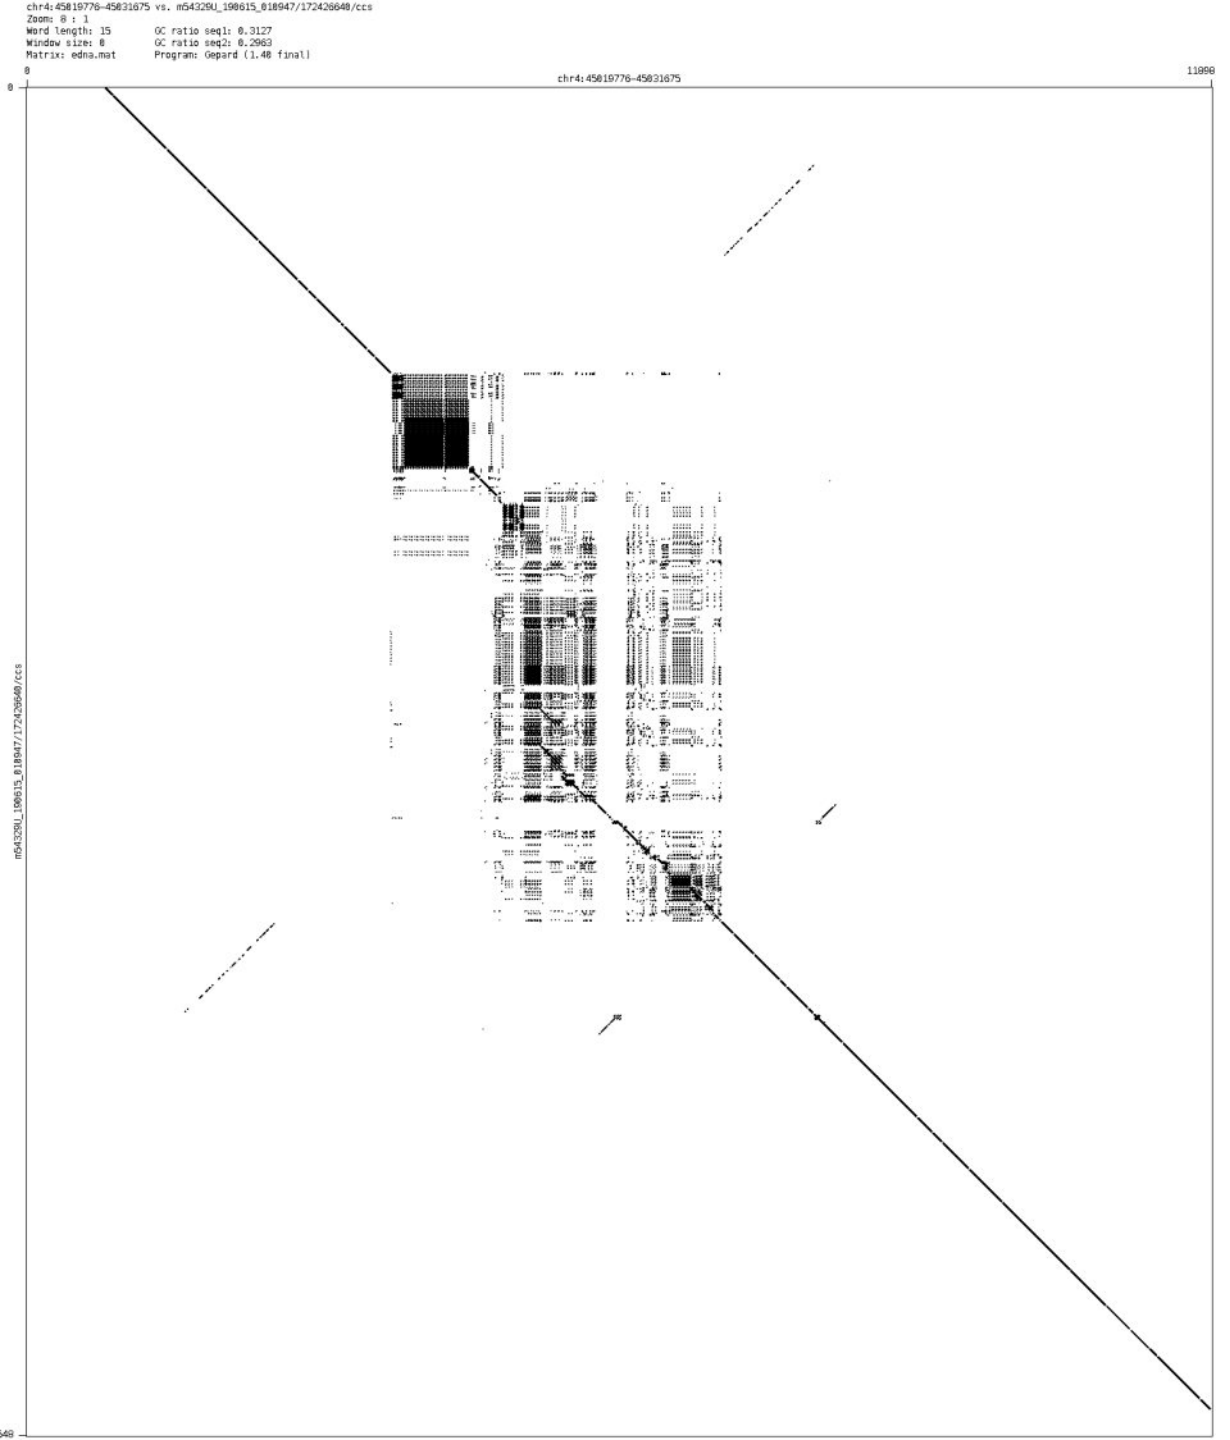

➤ chr4\_58562600\_58569633

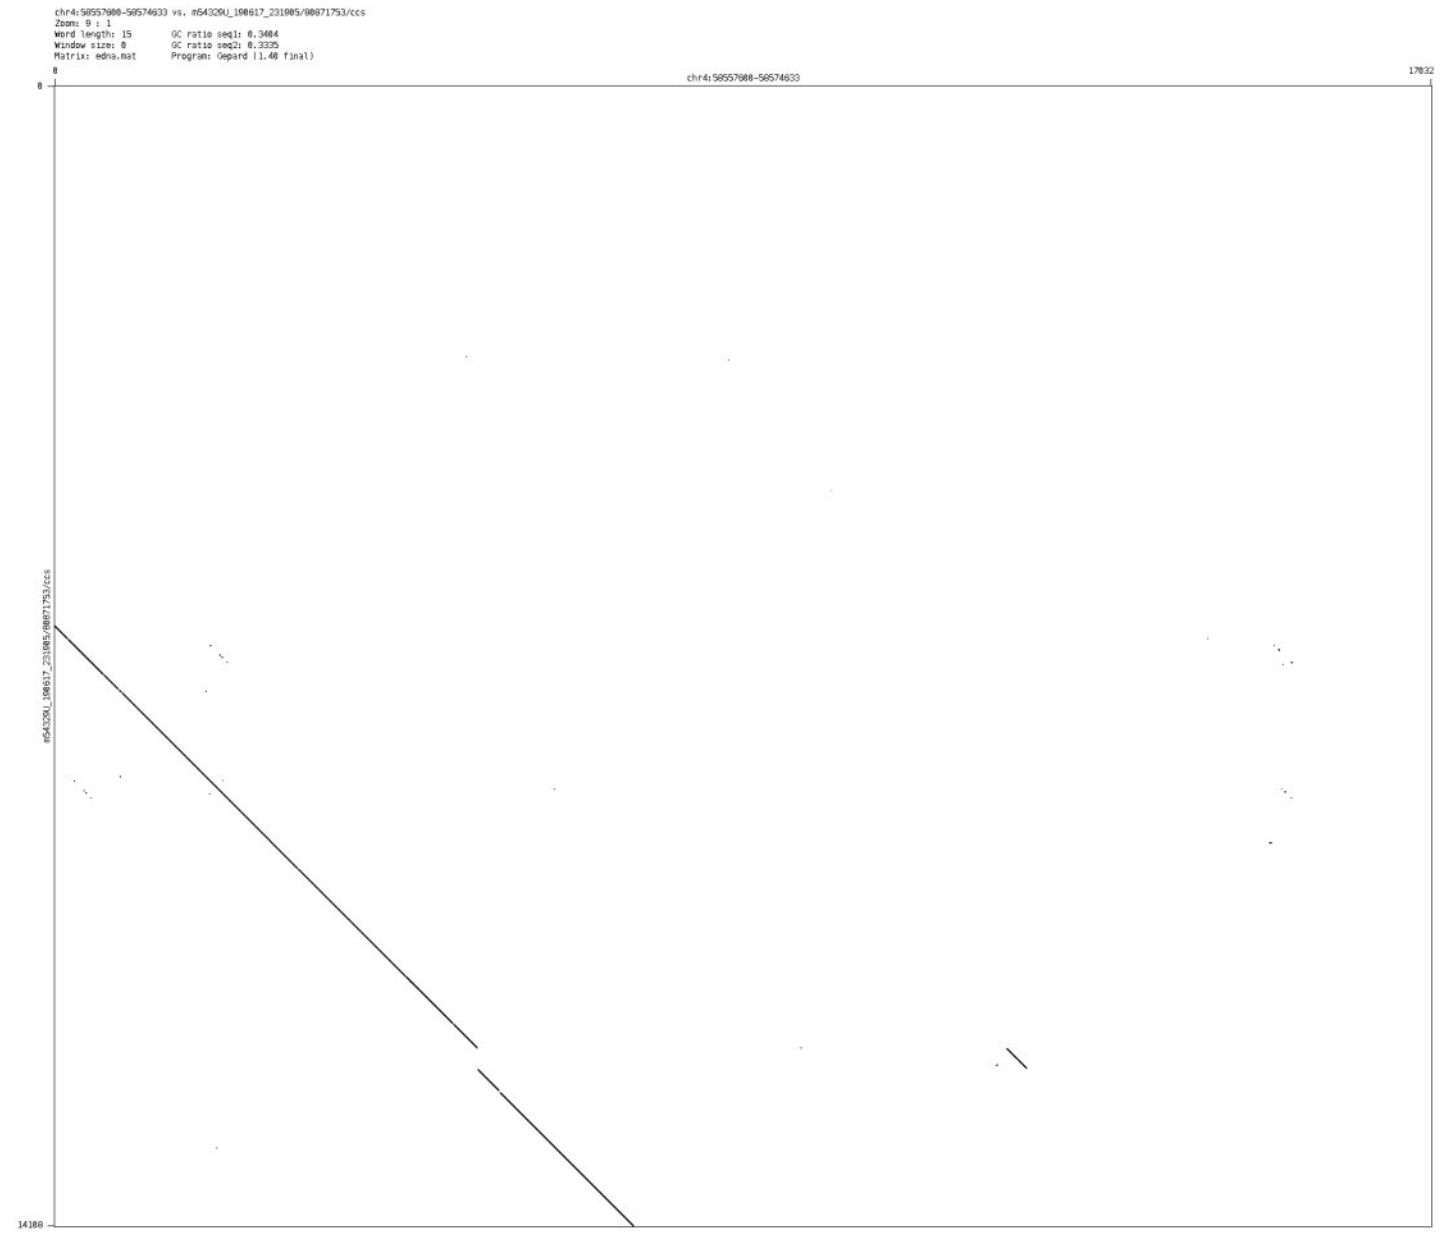

➤ chr4\_72456201\_72456342

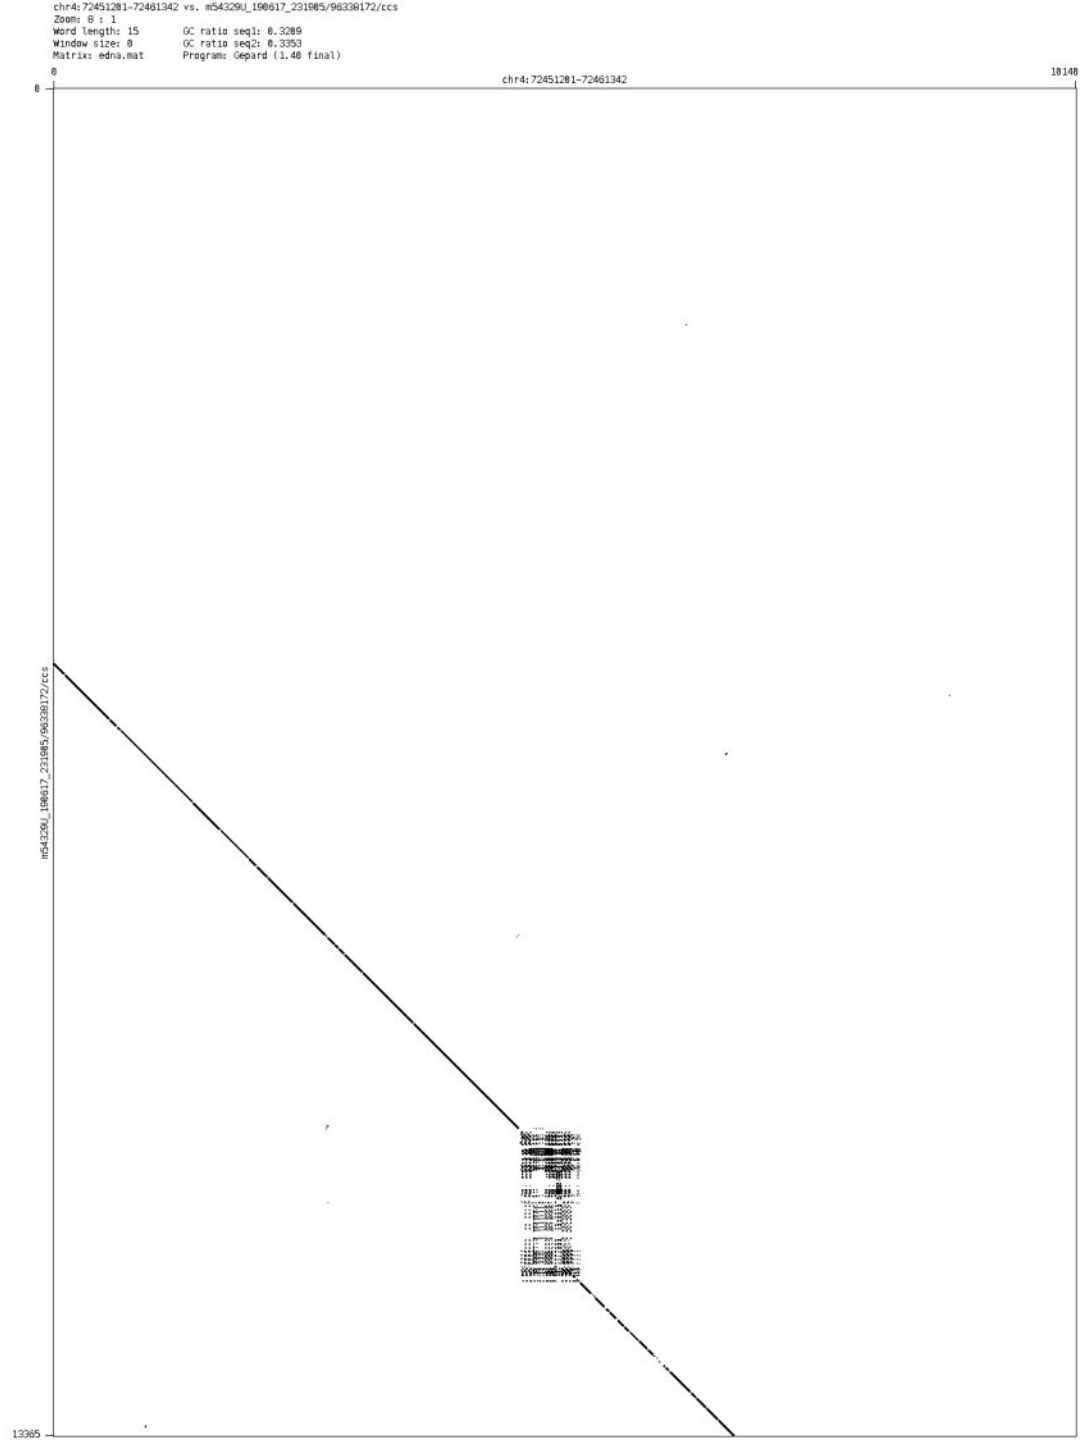

➤ chr4\_92646227\_92649130

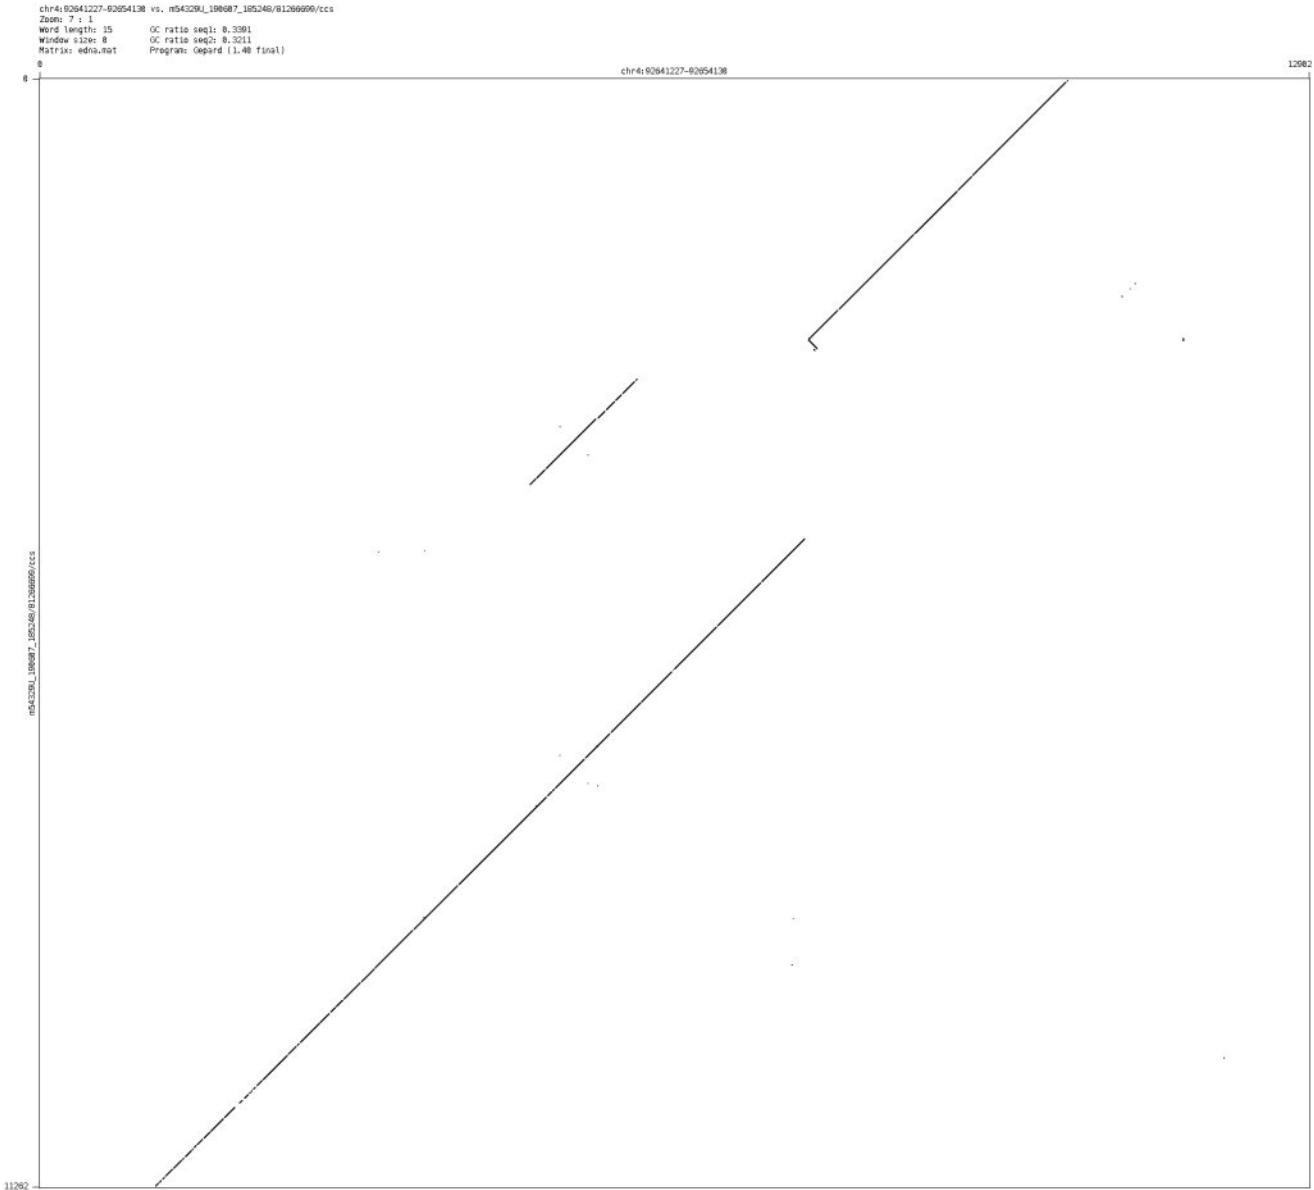



➤ chr4\_146286299\_146286463

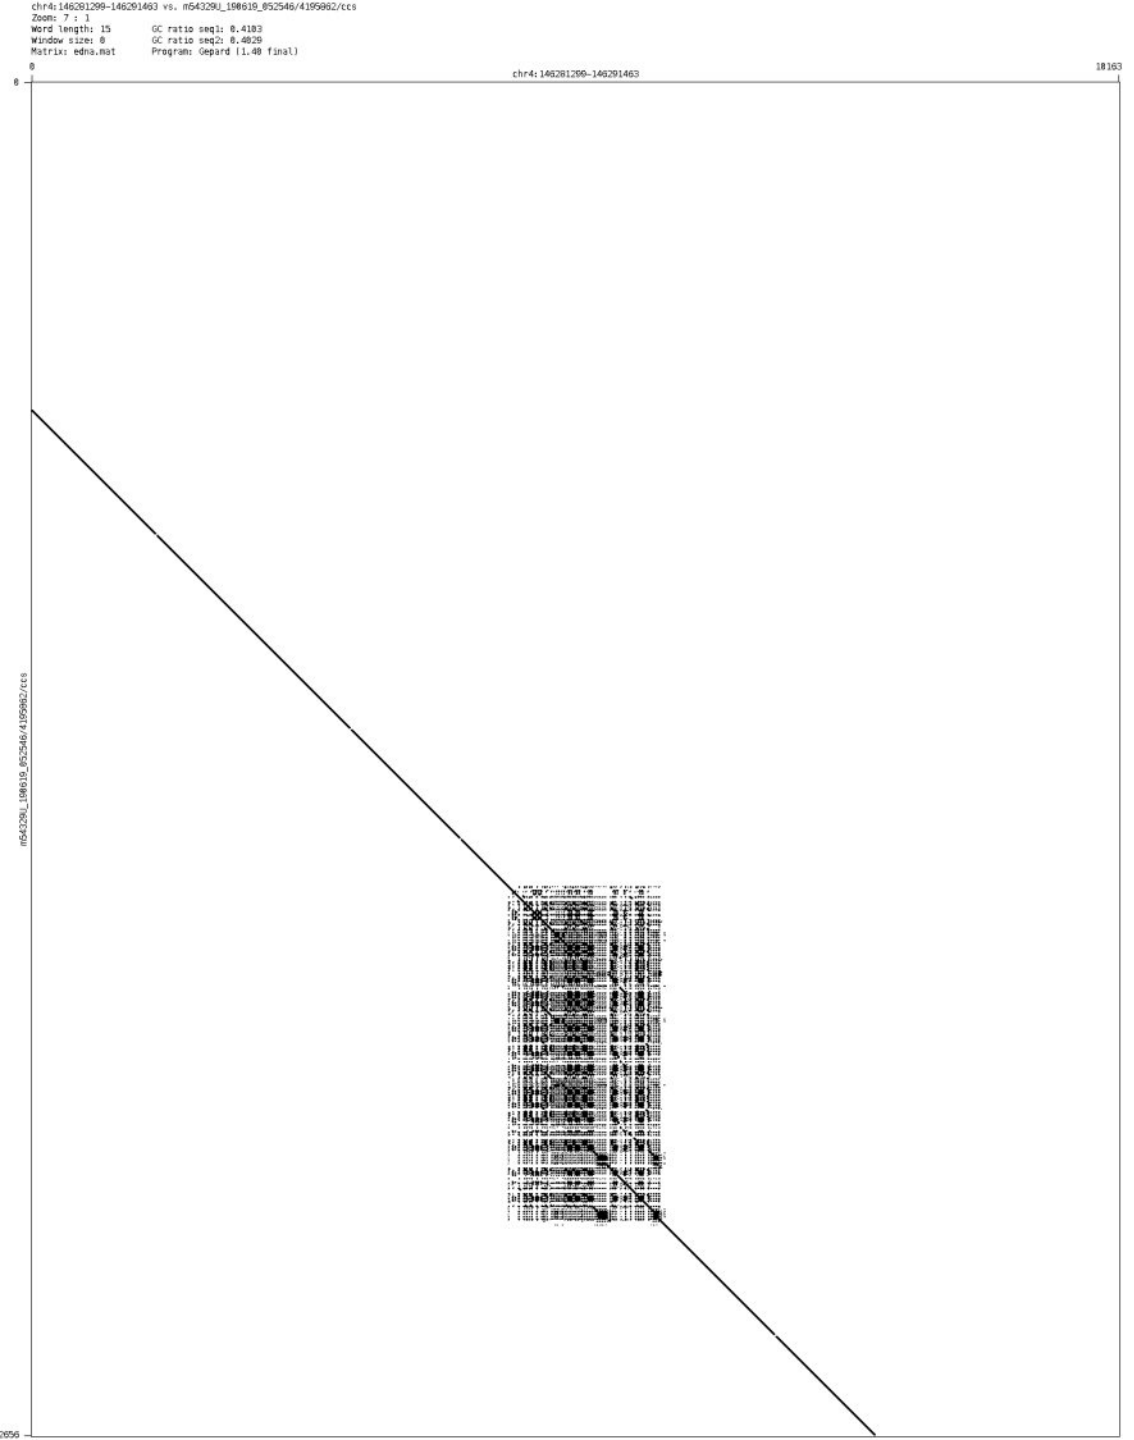

➤ chr4\_162657226\_162658438

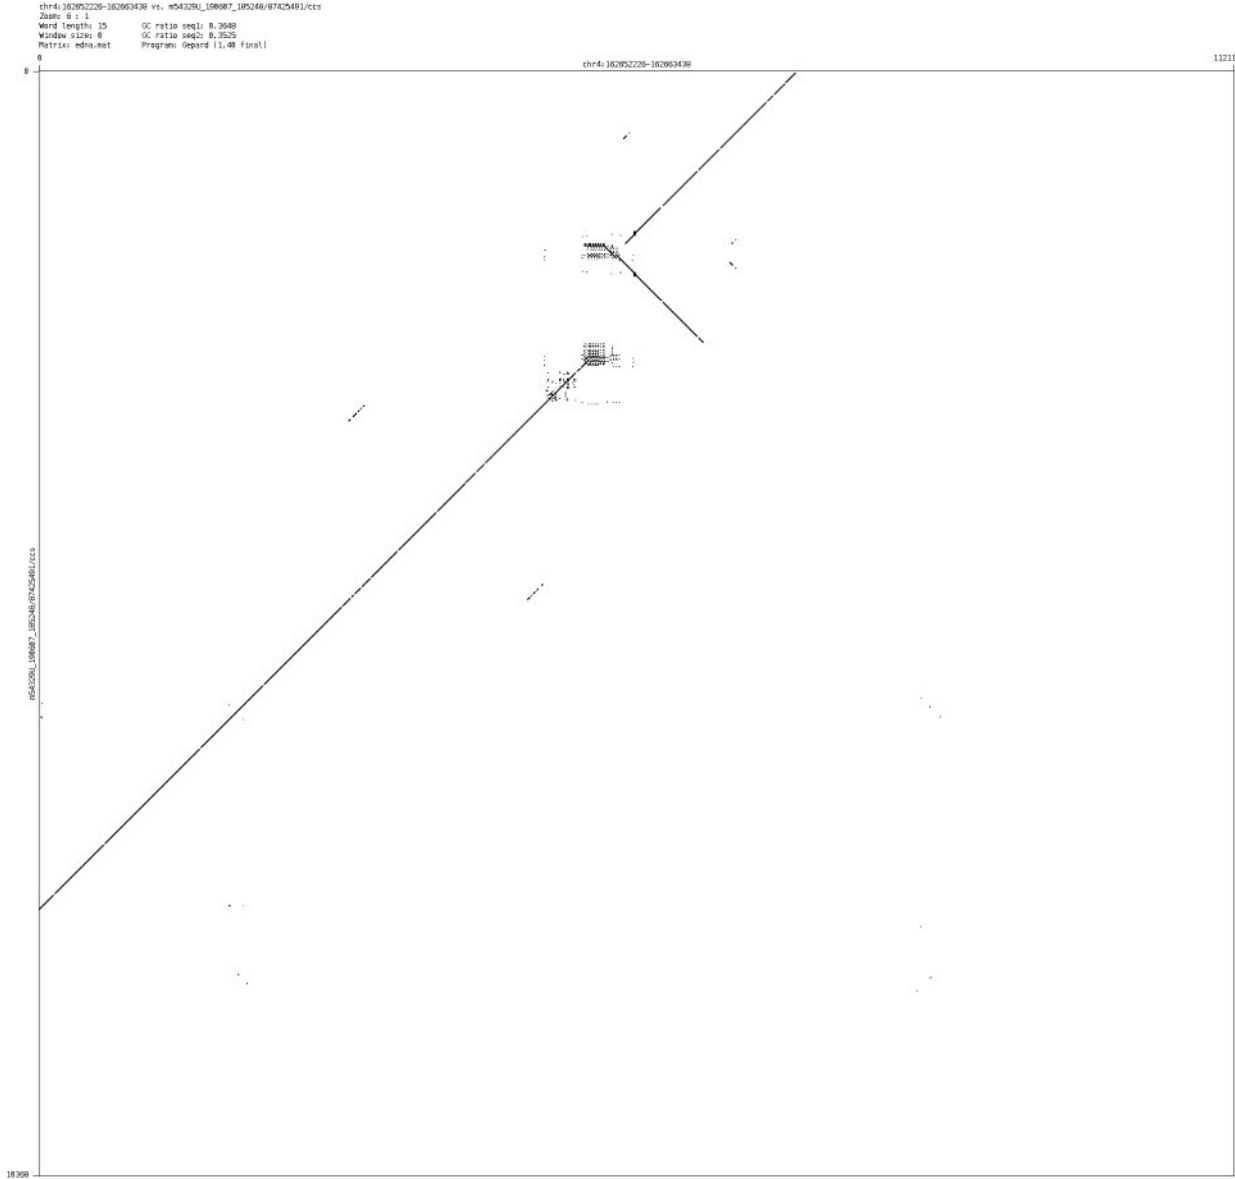

➤ chr5\_266746\_266883

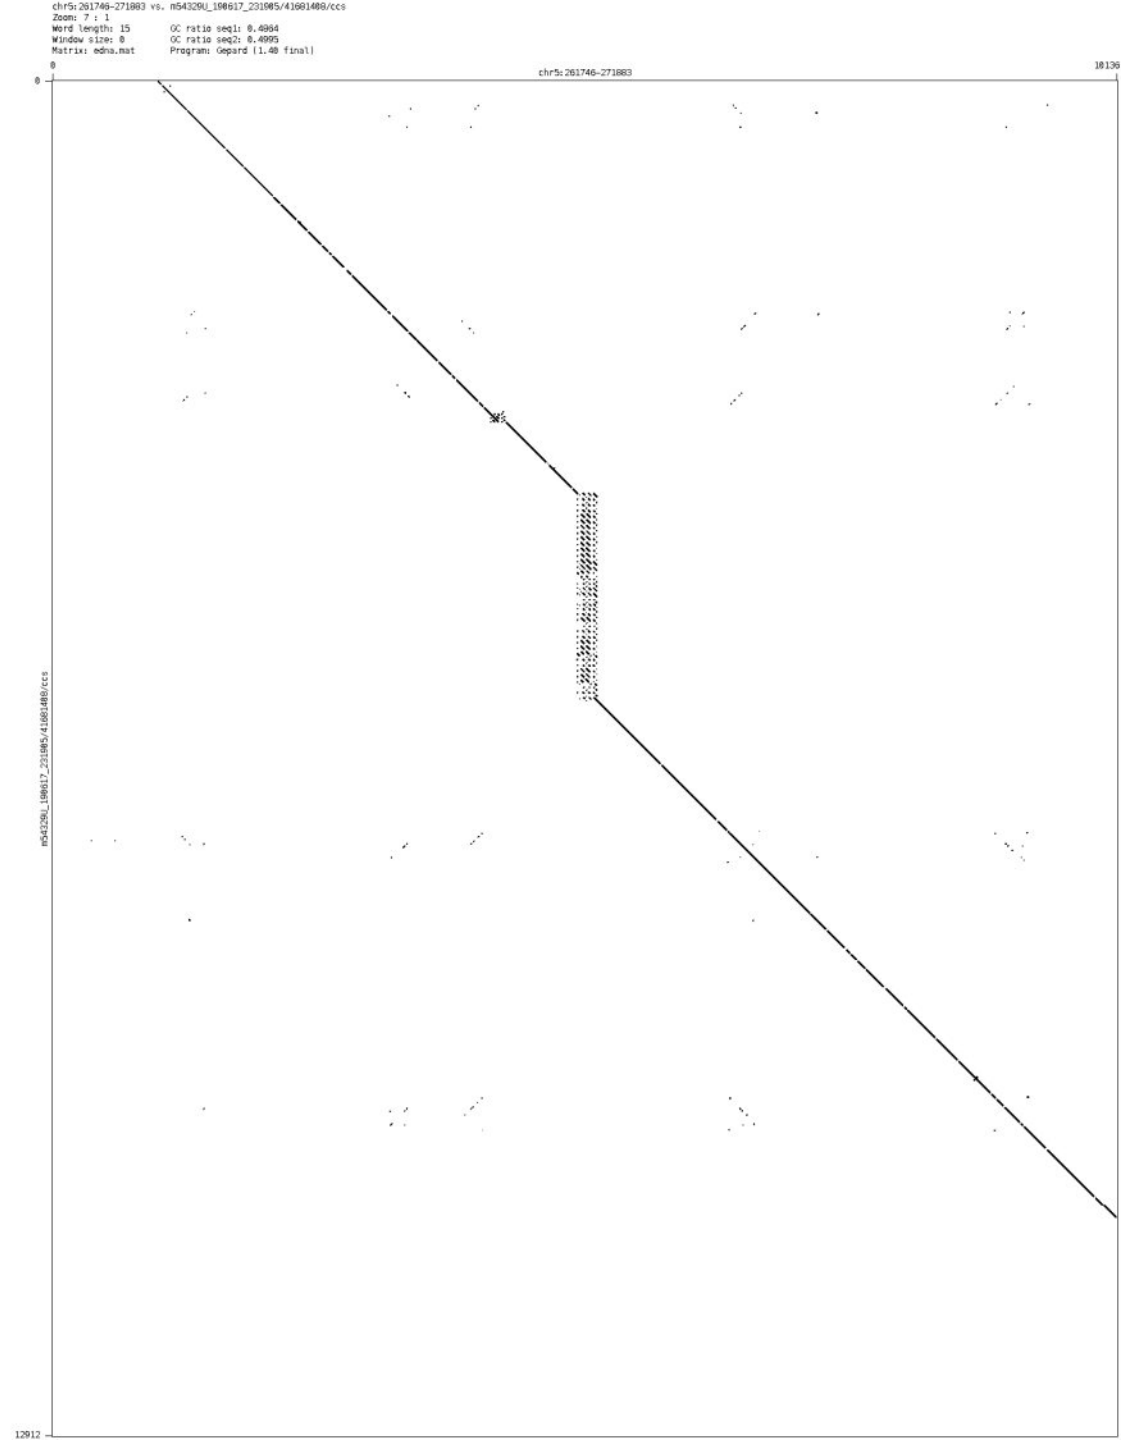

➤ chr5\_415491\_415686

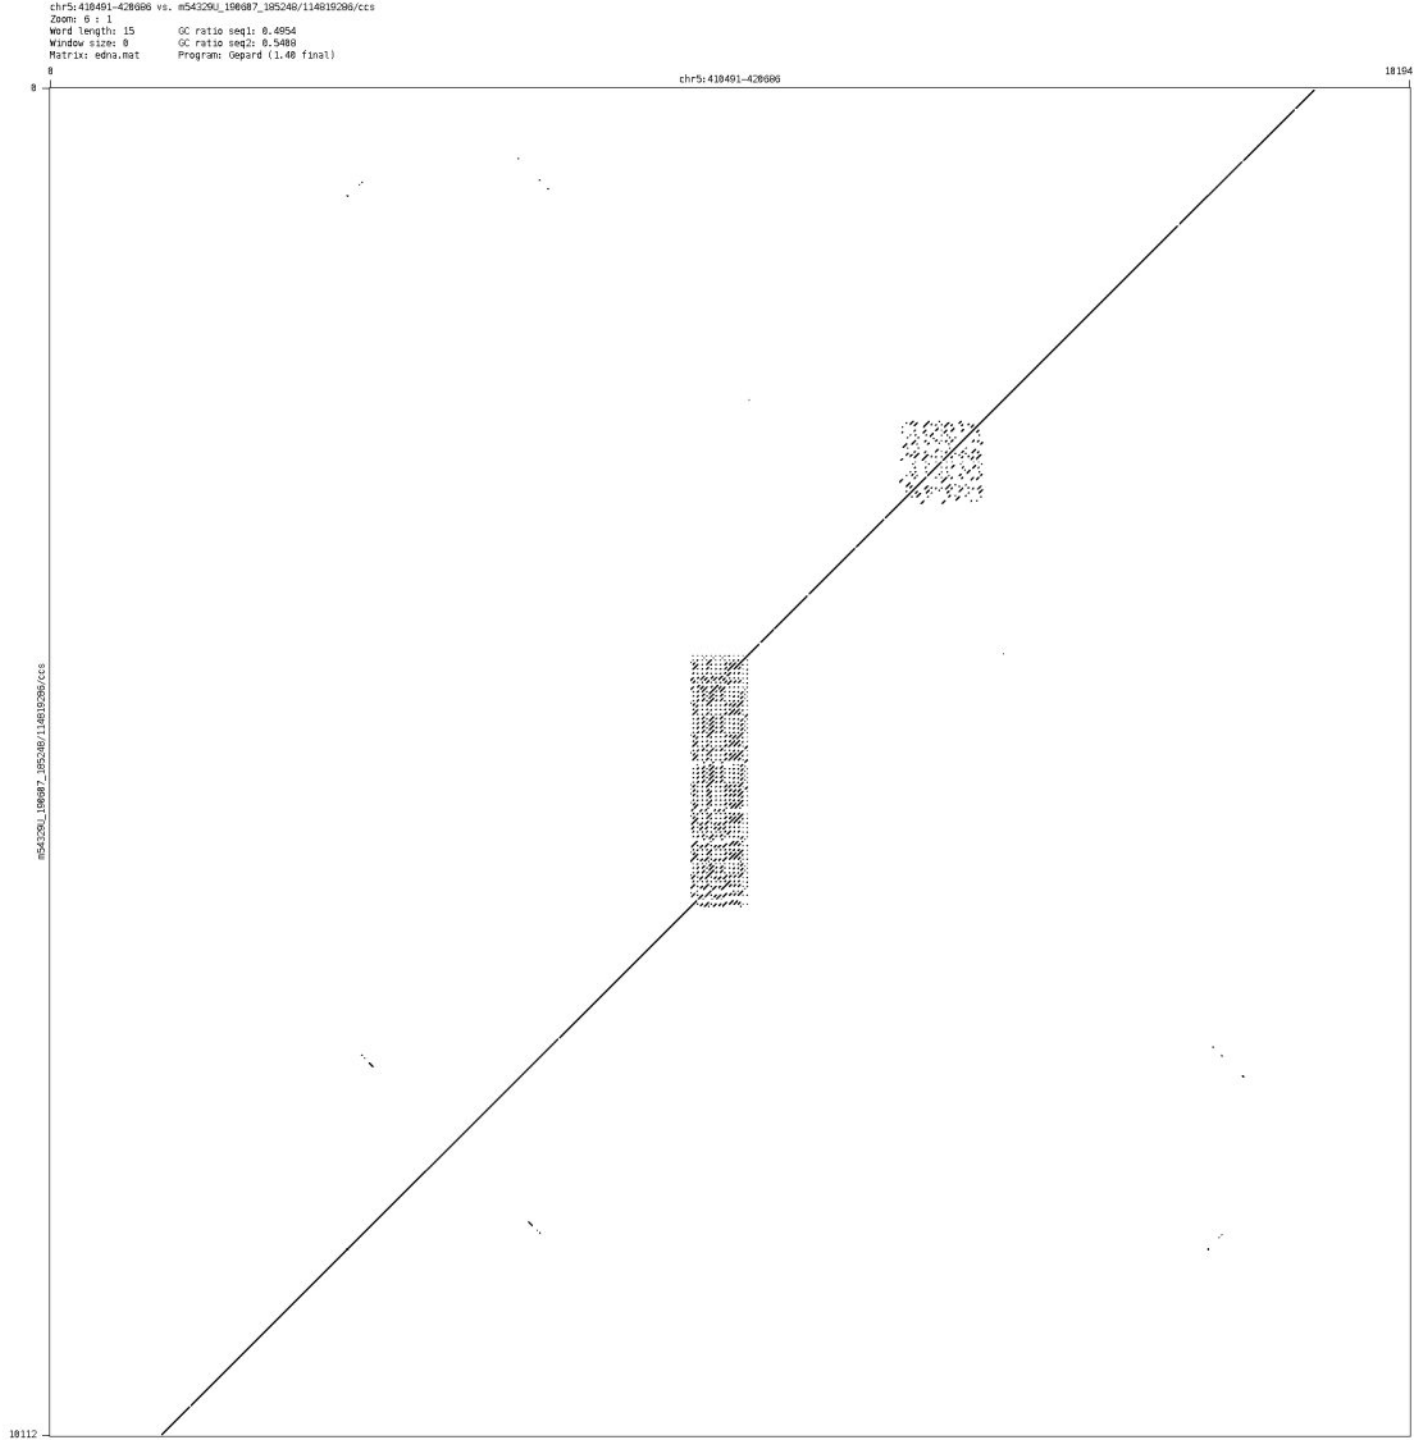

➤ chr5\_628465\_628658

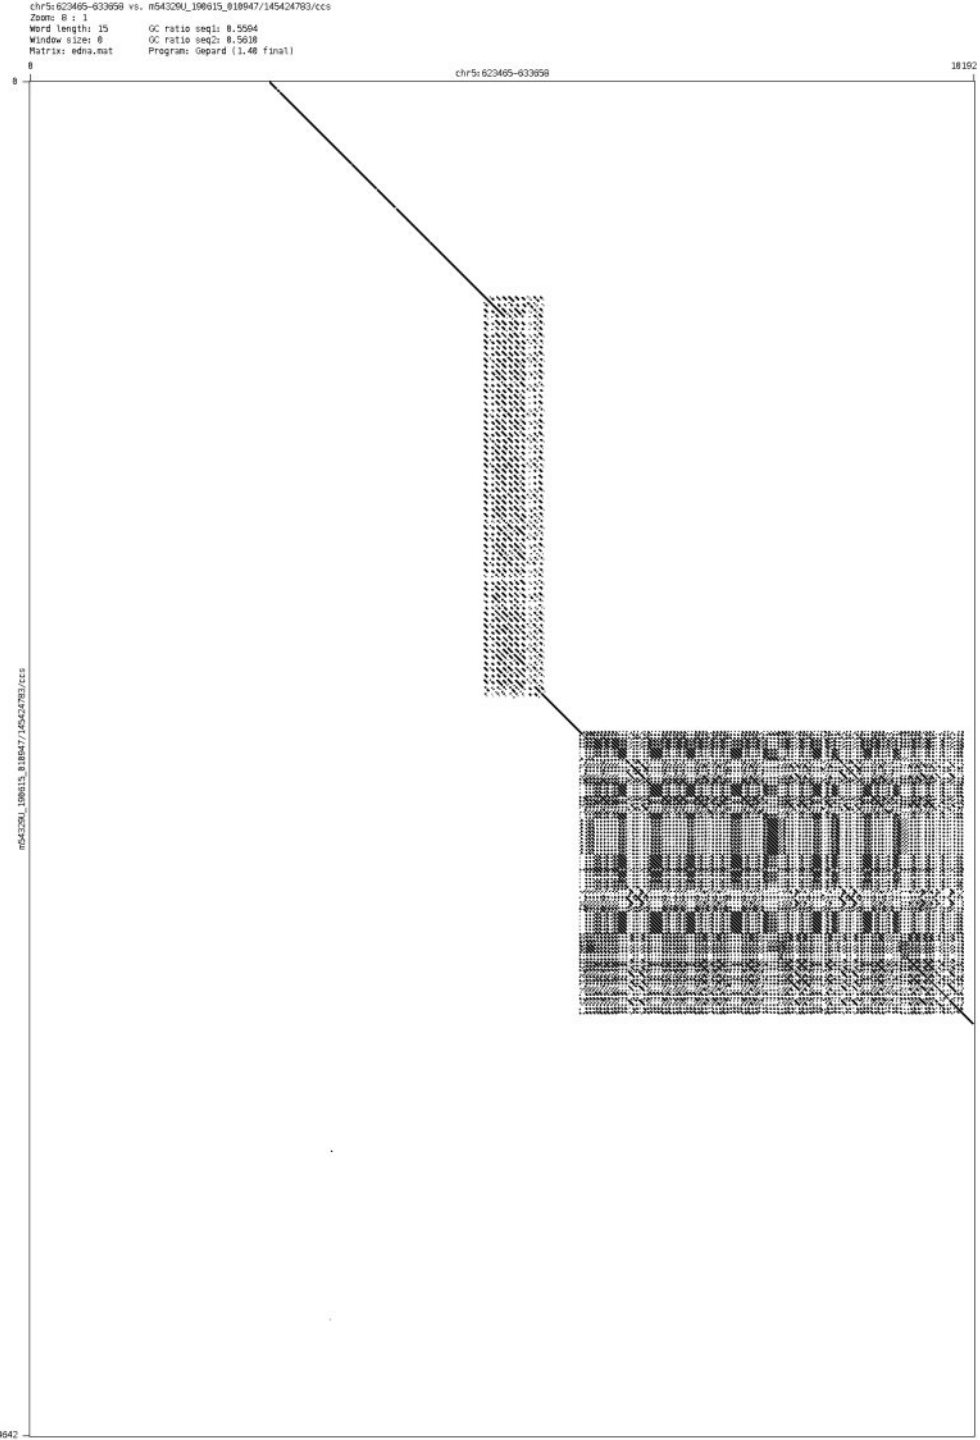

➤ chr5\_1044925\_1045186

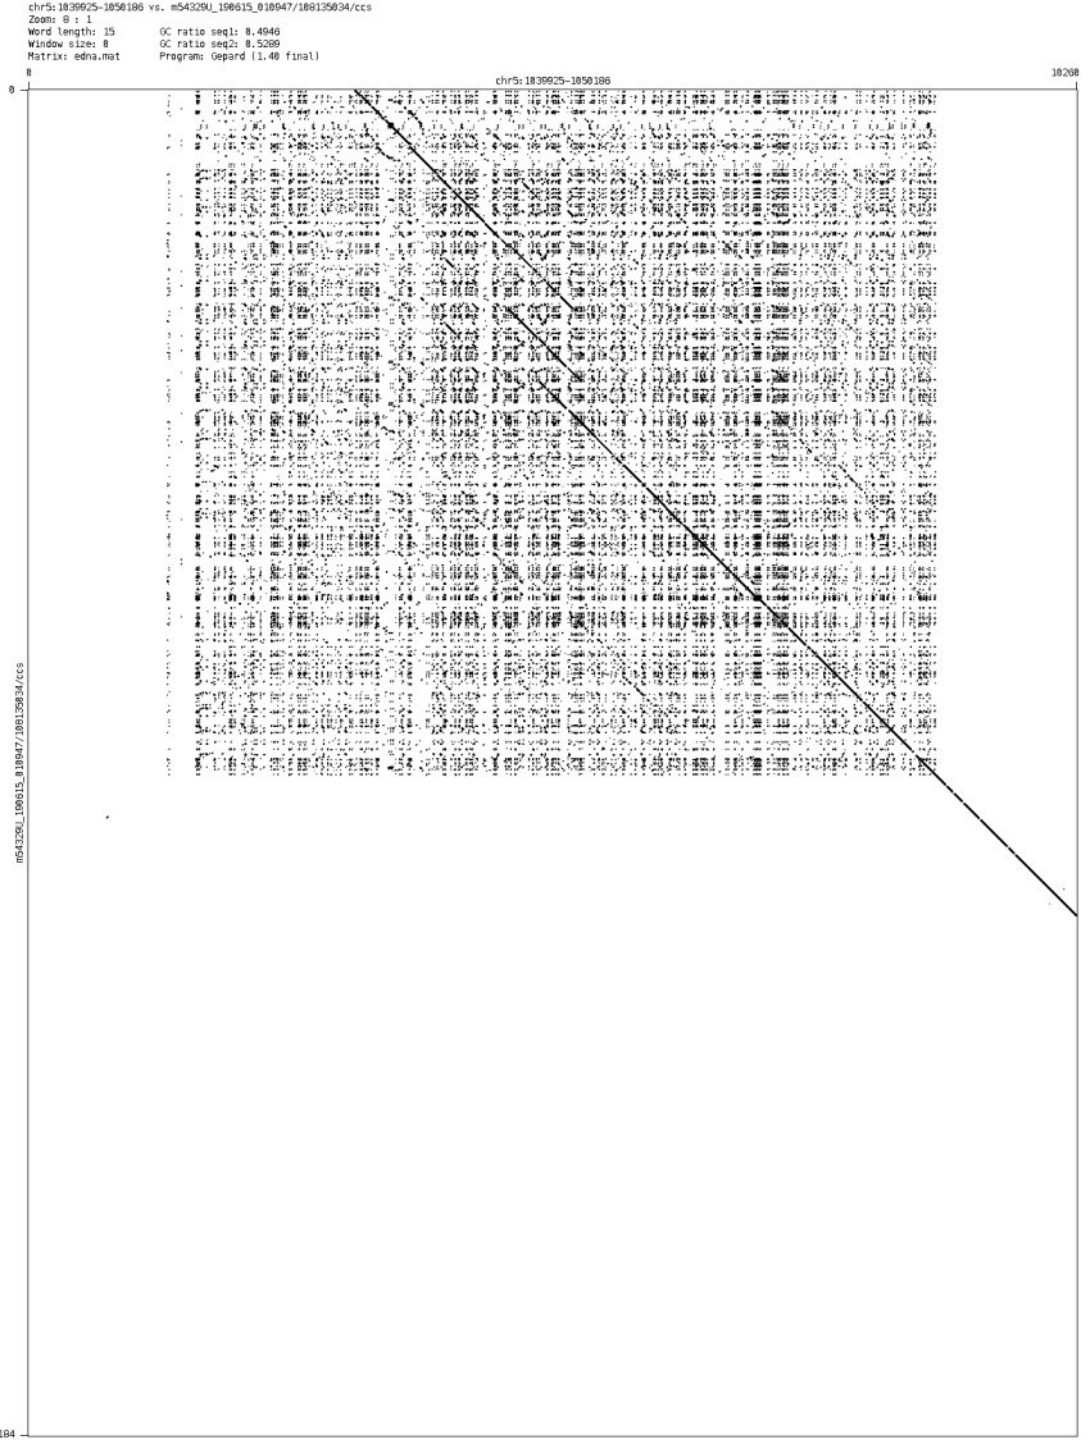

➤ chr5\_1192054\_1192167

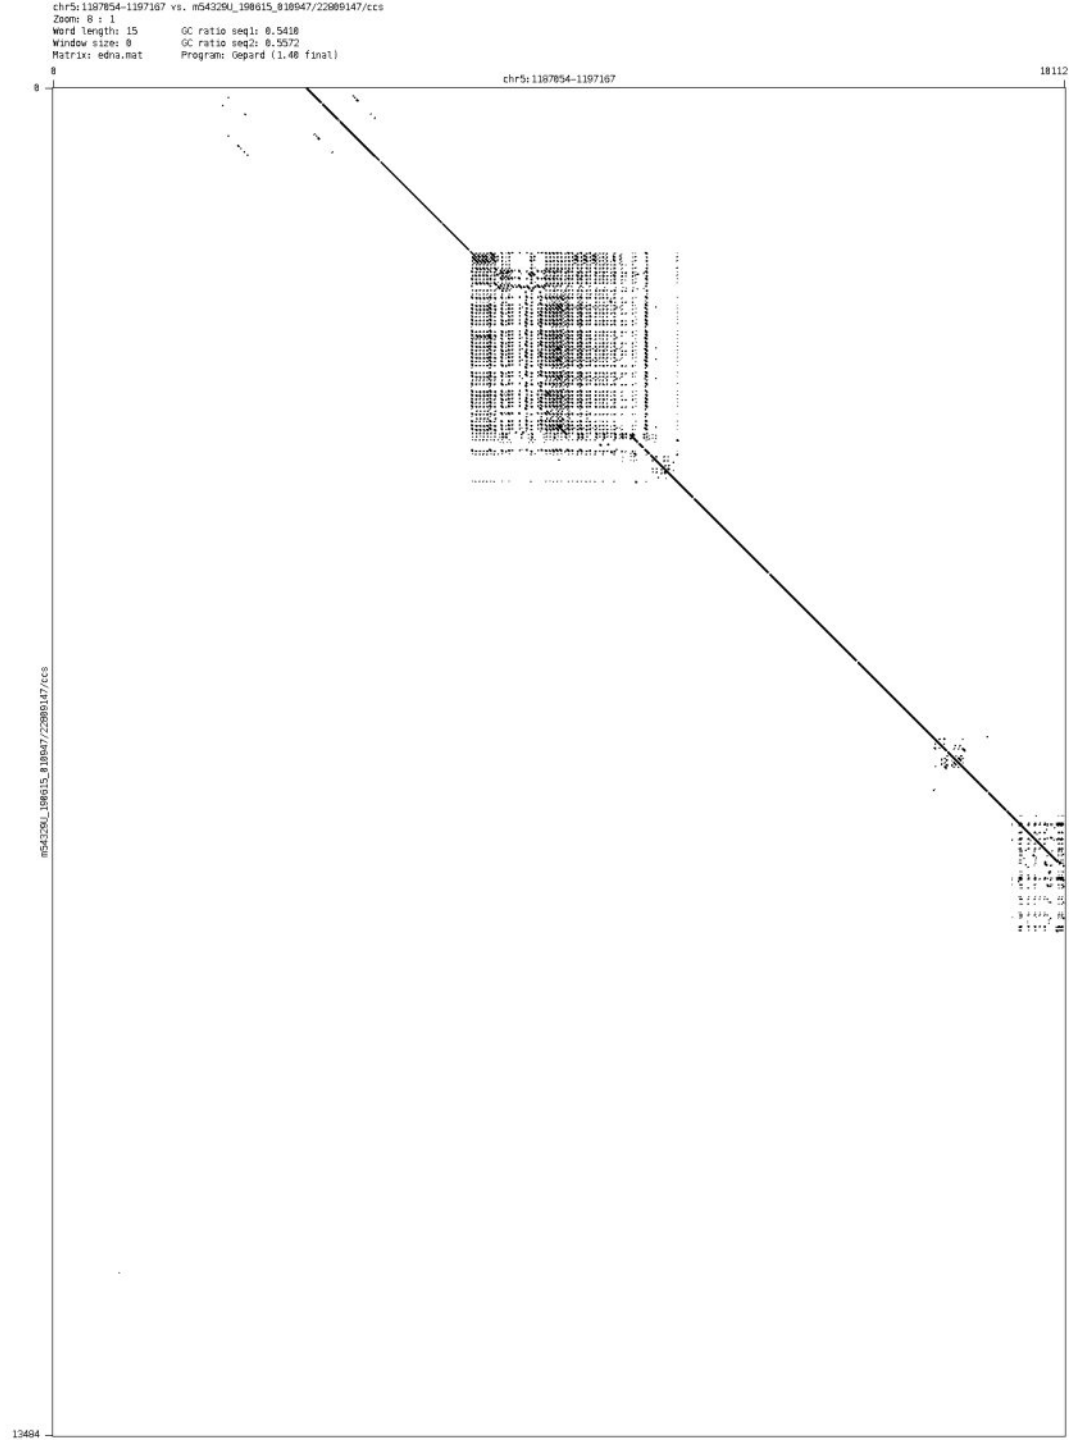

➤ chr5\_1273419\_1273547

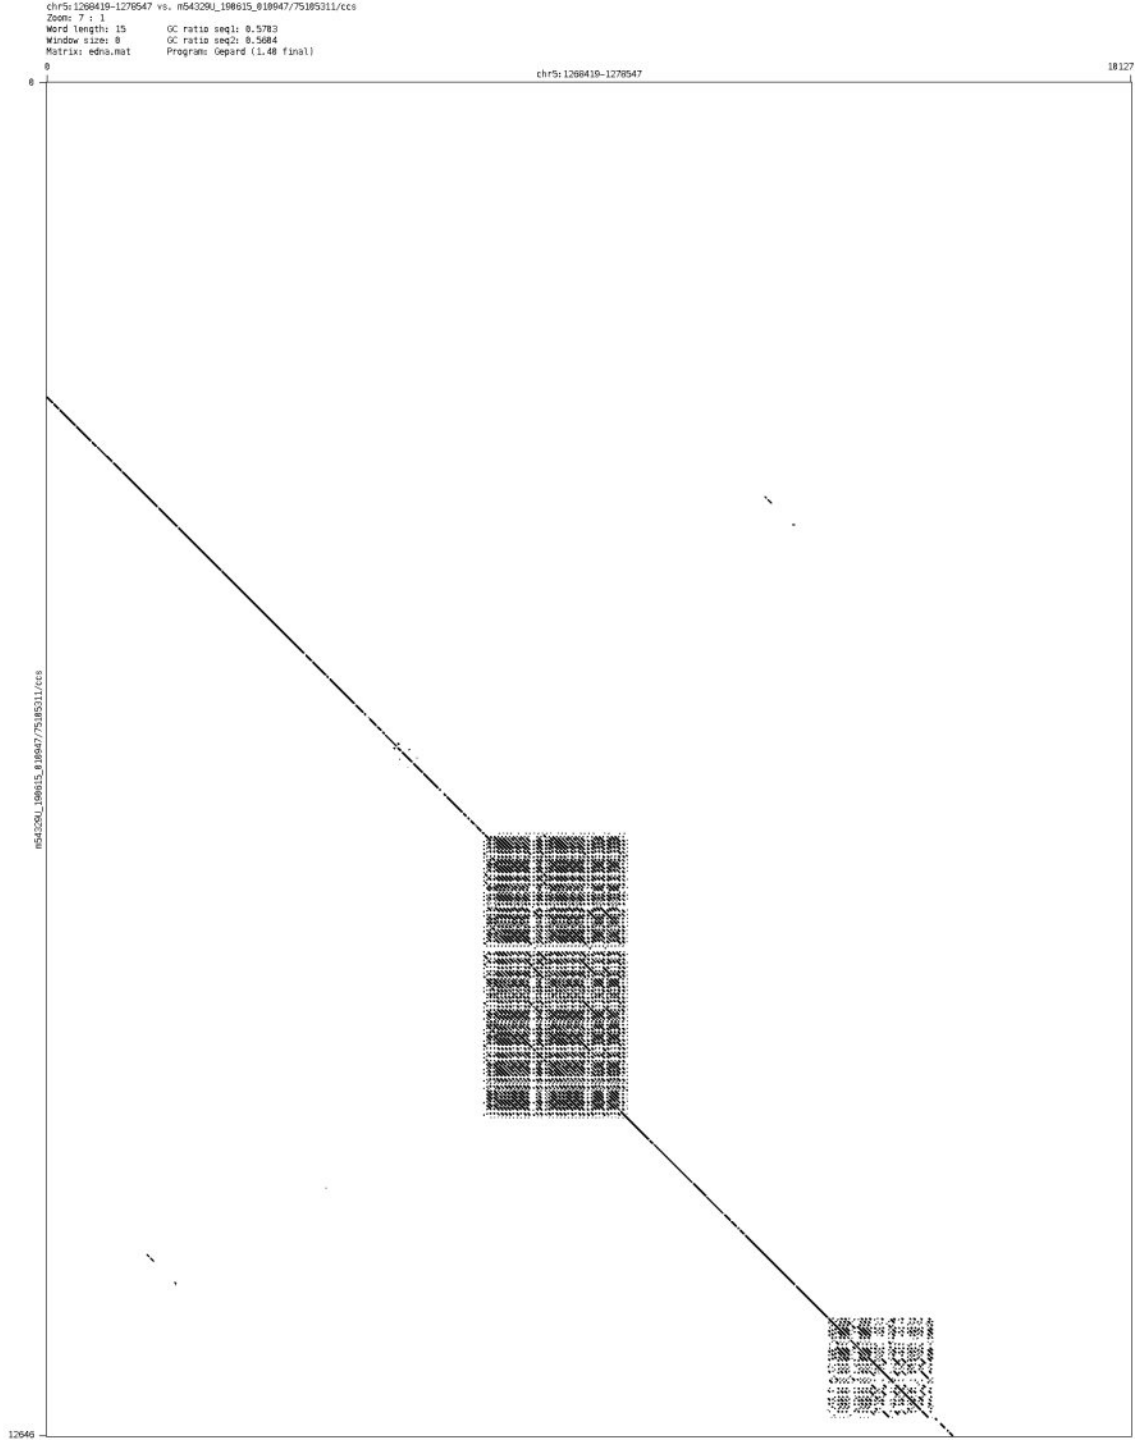



➤ chr5\_1539973\_1540158

chr5:1534973-1545158 vs. m543290\_190867\_165248/24315283/ccs  
Zoom: 8 : 1  
Word length: 15 GC ratio seq1: 0.4965  
Window size: 8 GC ratio seq2: 0.5395  
Matrix: edna.mat Program: (cpard [1.48 final])

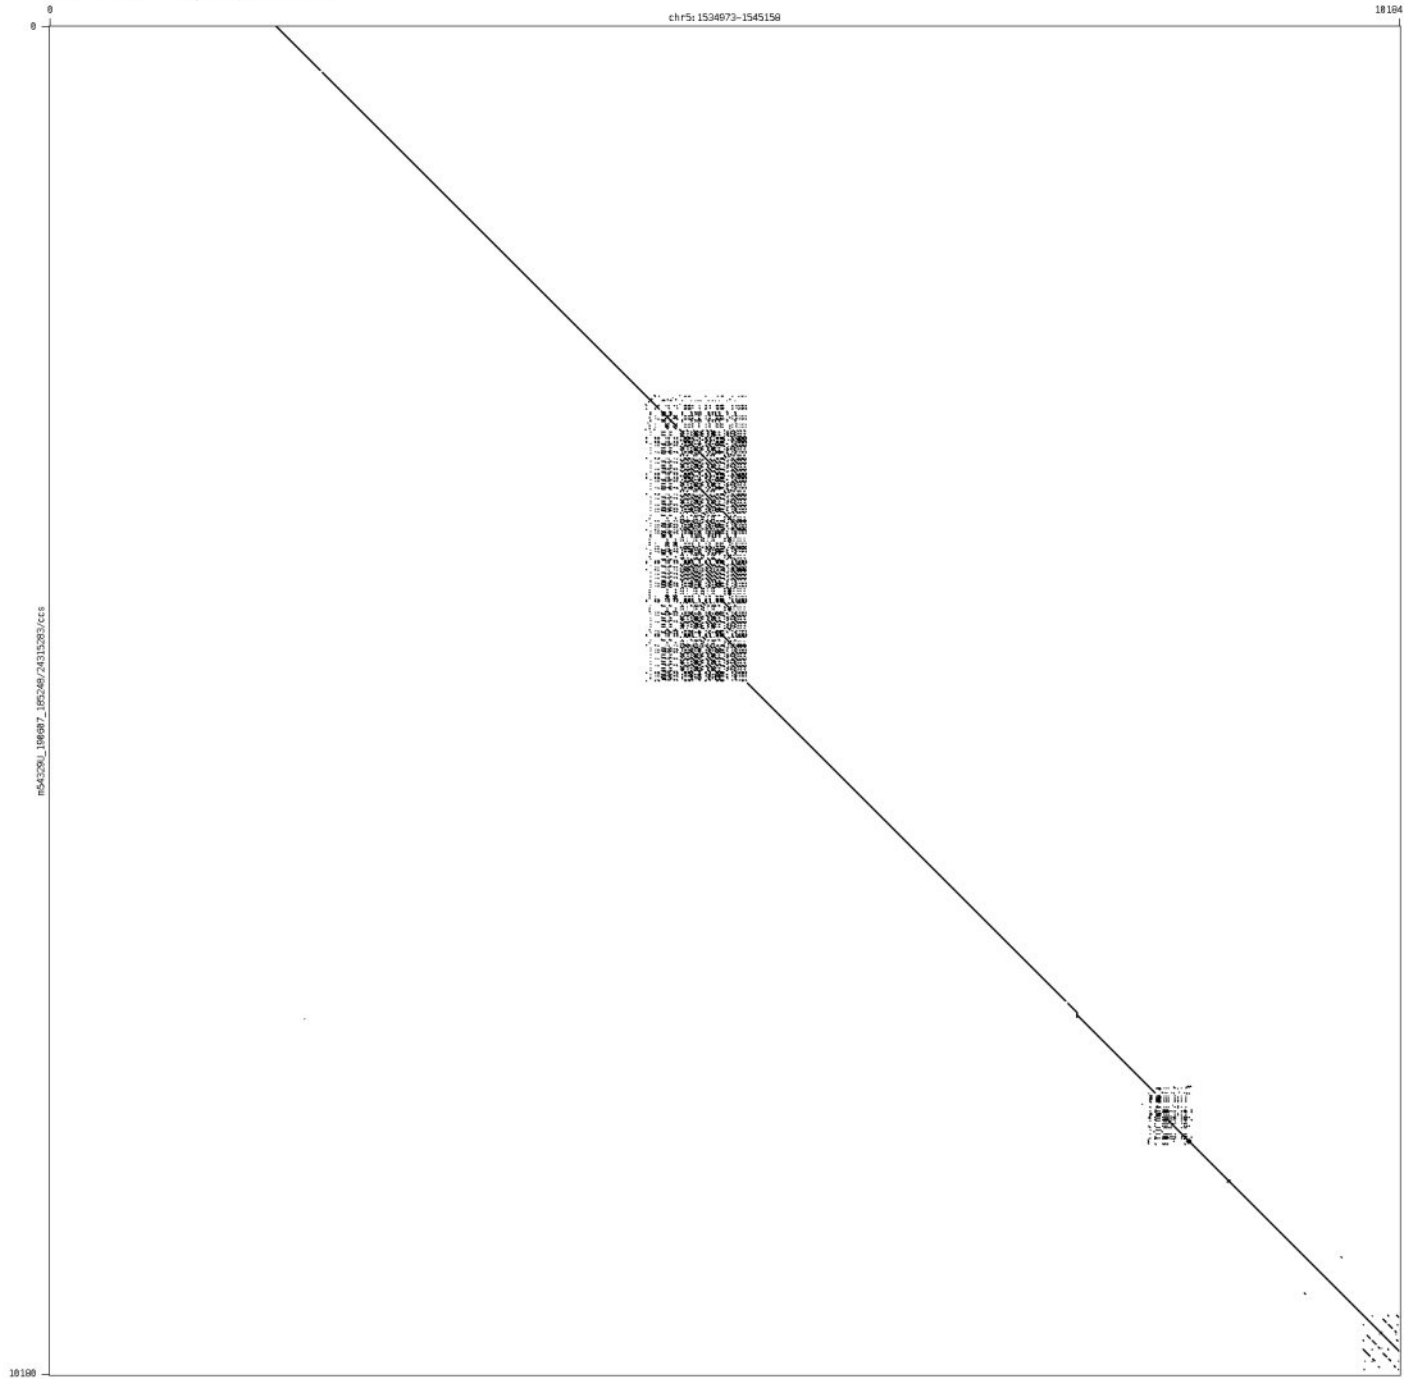

➤ chr5\_1845637\_1845877

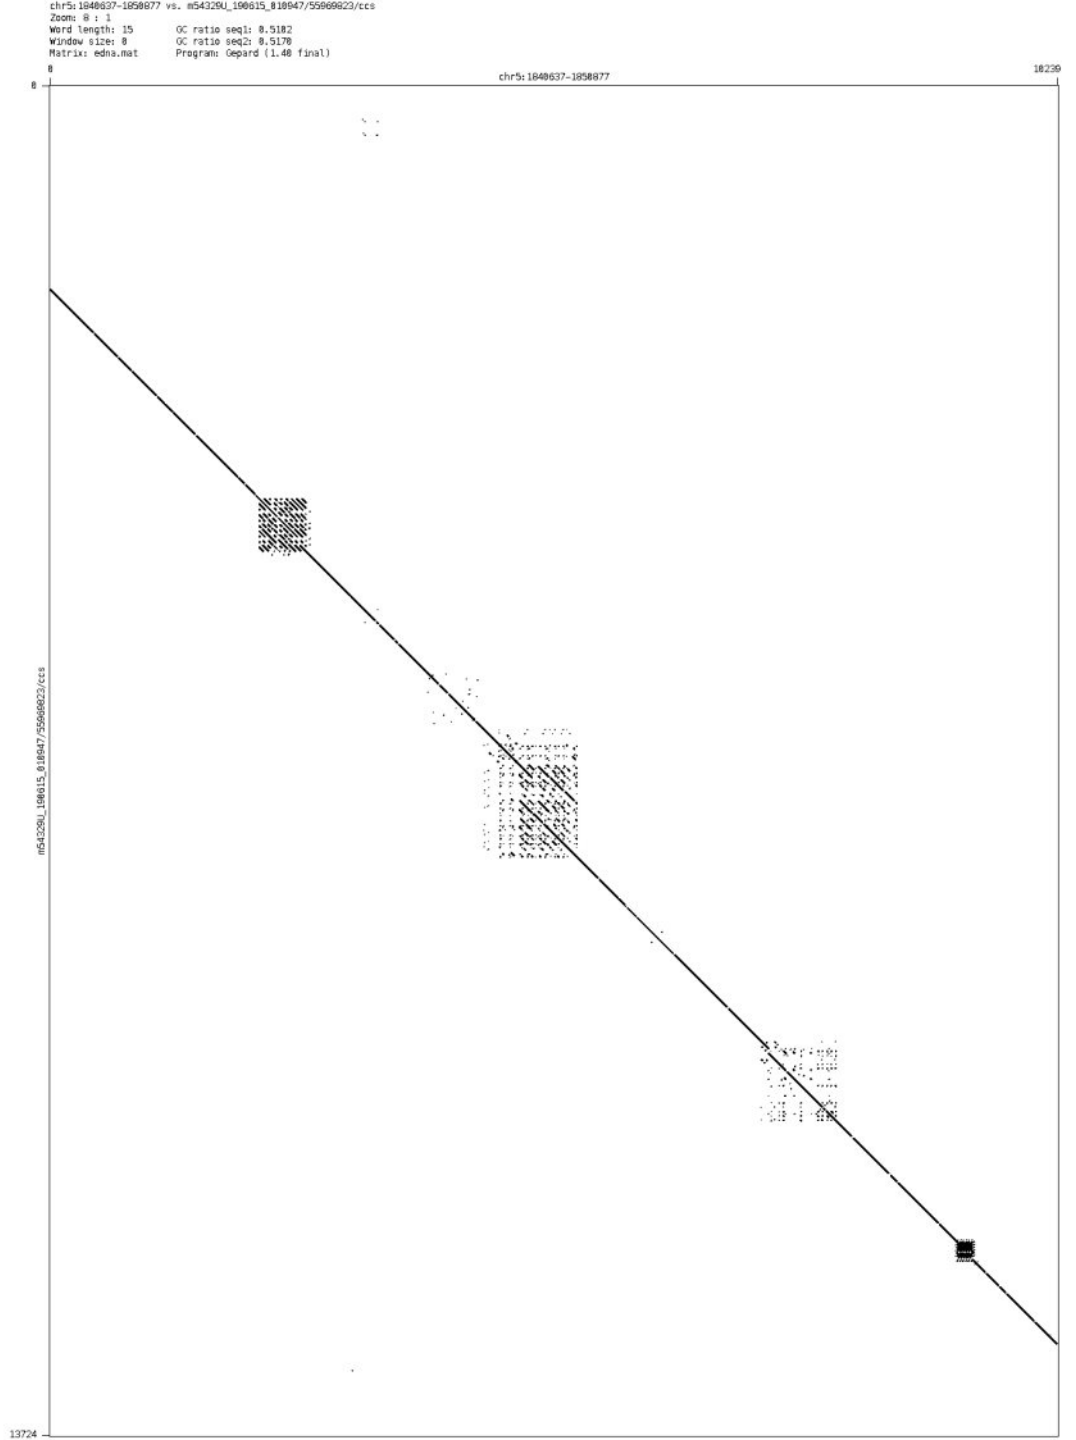

➤ chr5\_3323810\_3324066

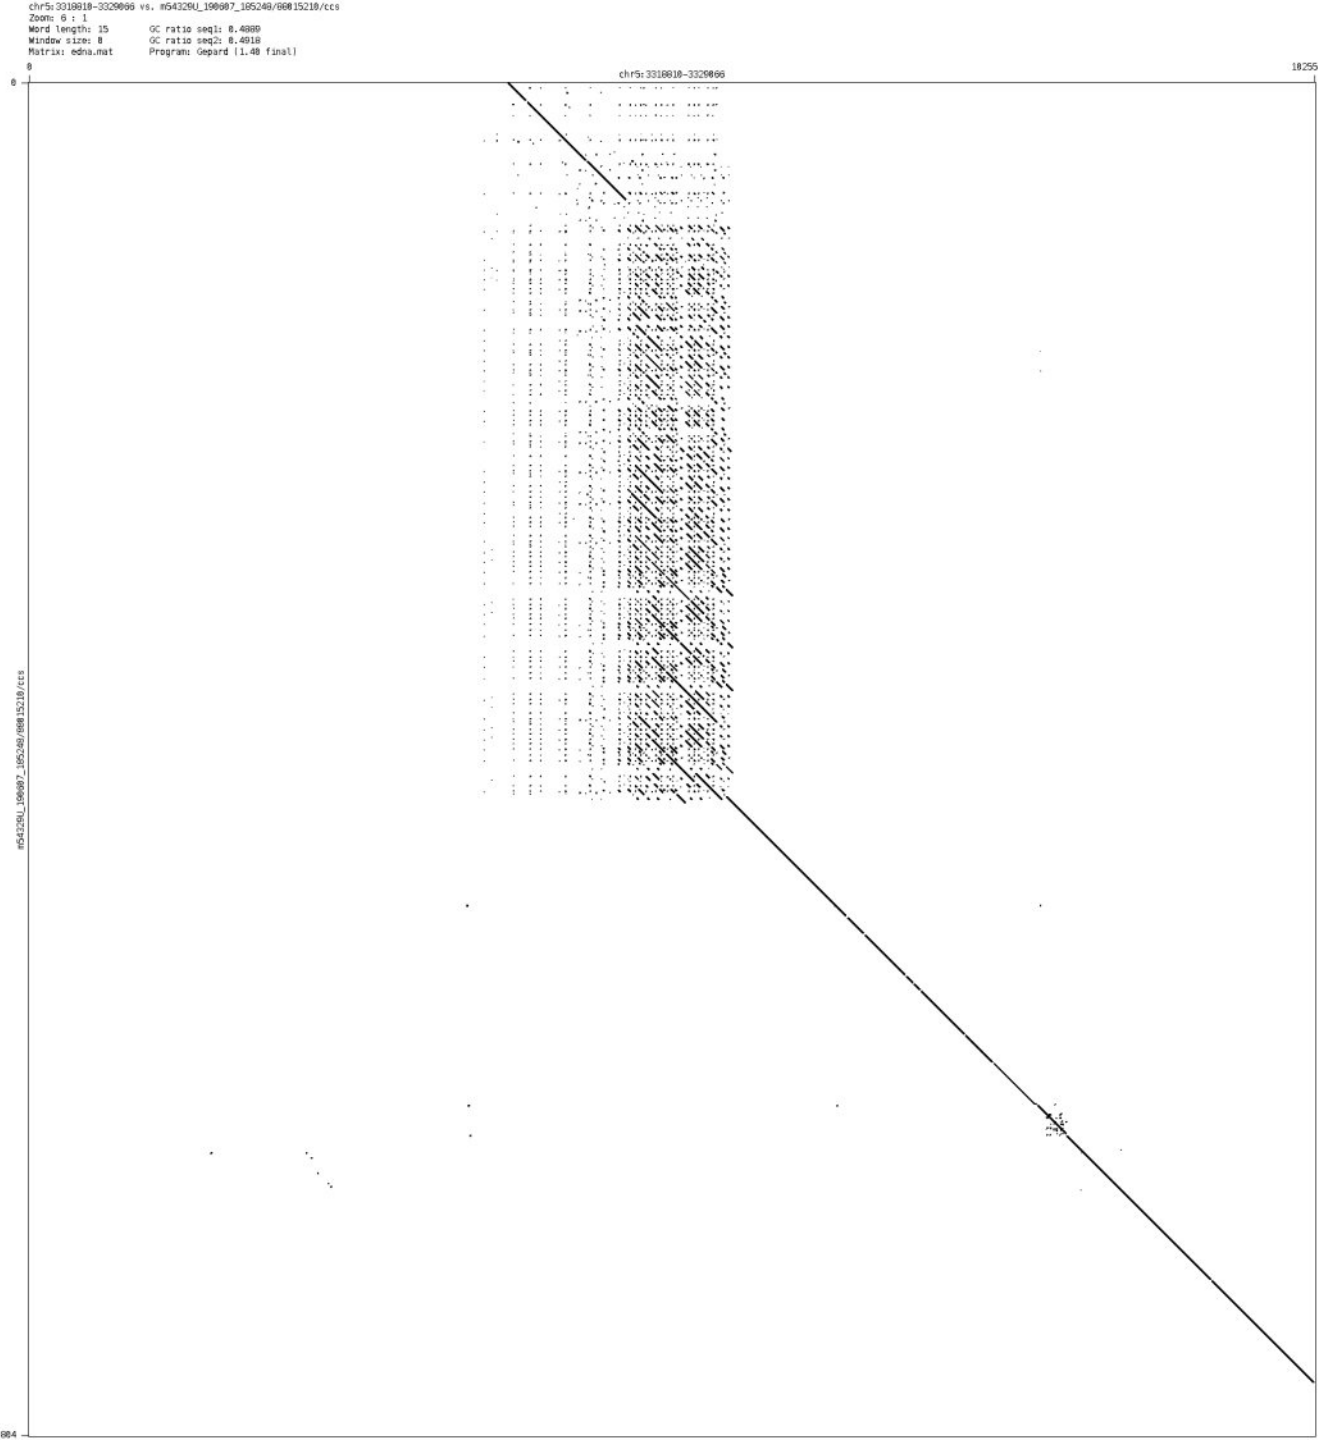

➤ chr5\_3659963\_3660133

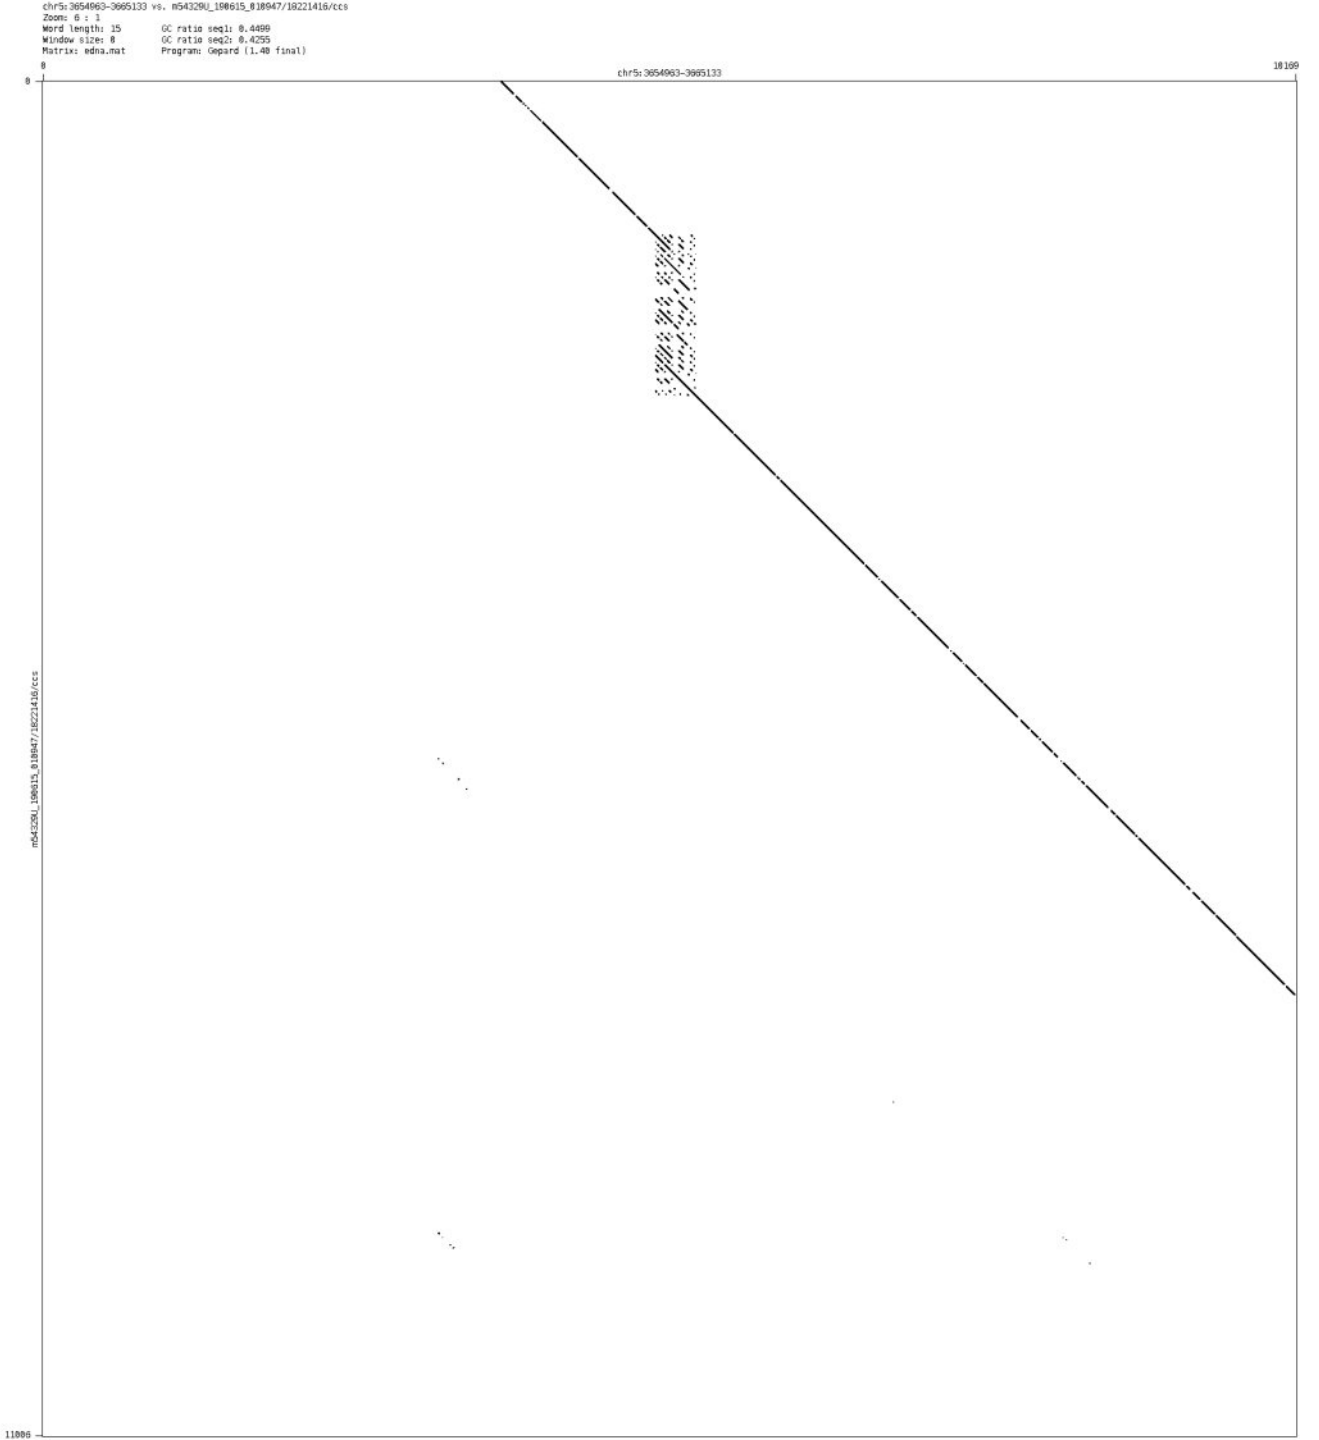

➤ chr5\_5305060\_5305279

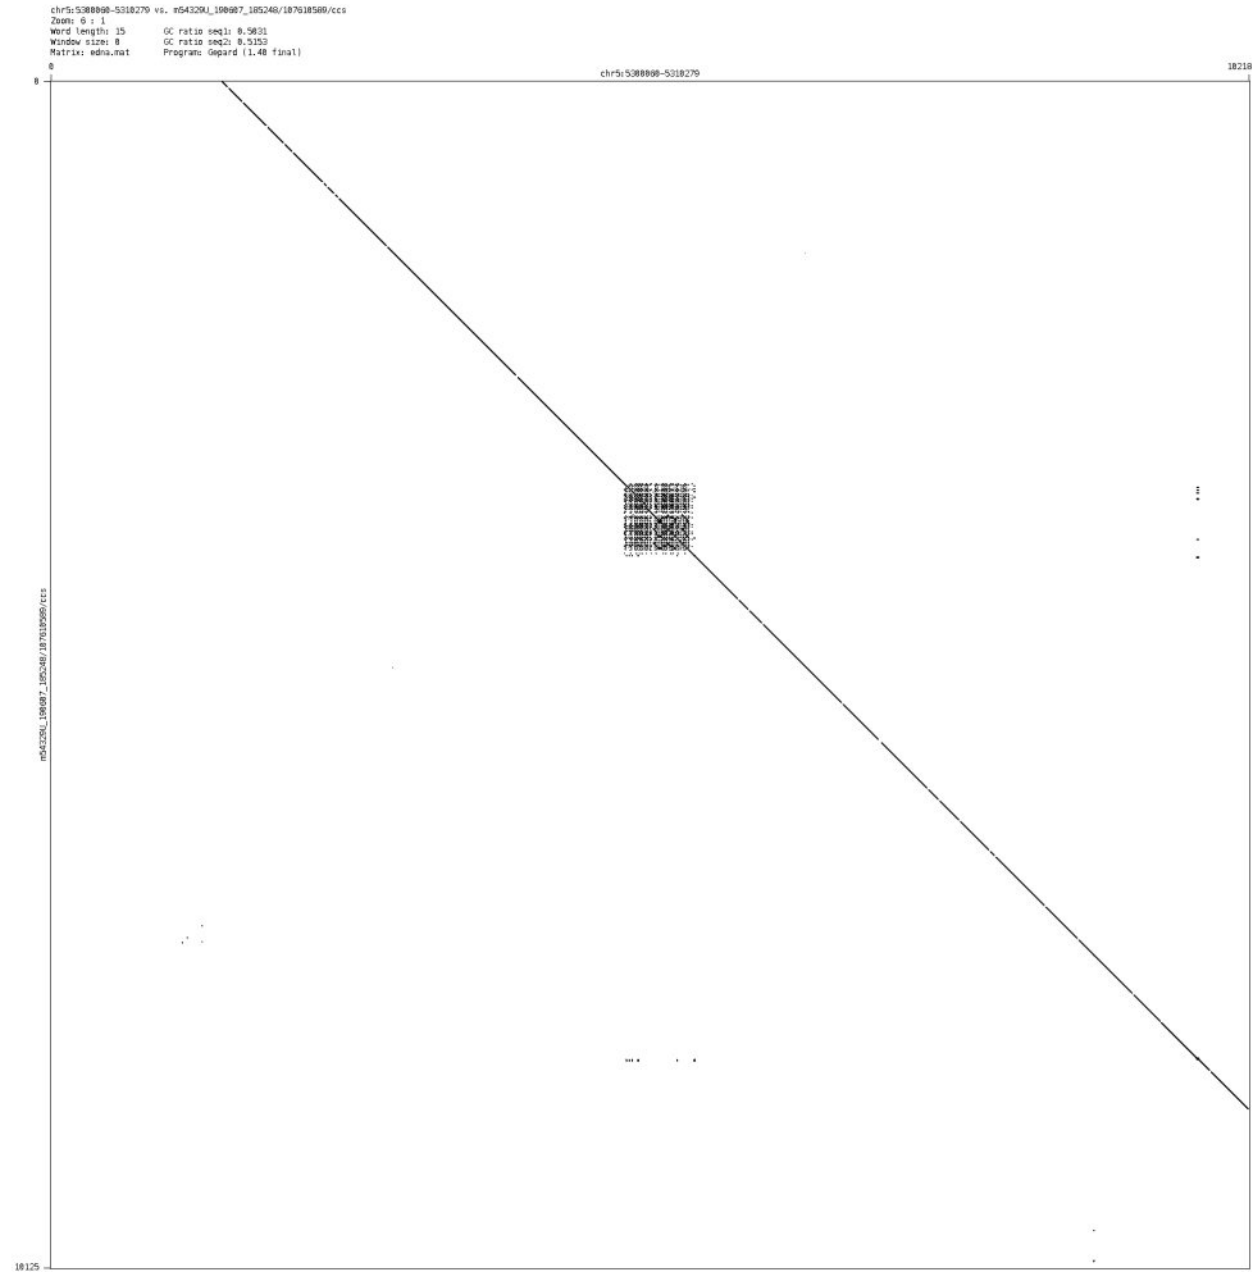

➤ chr5\_7372546\_7372667

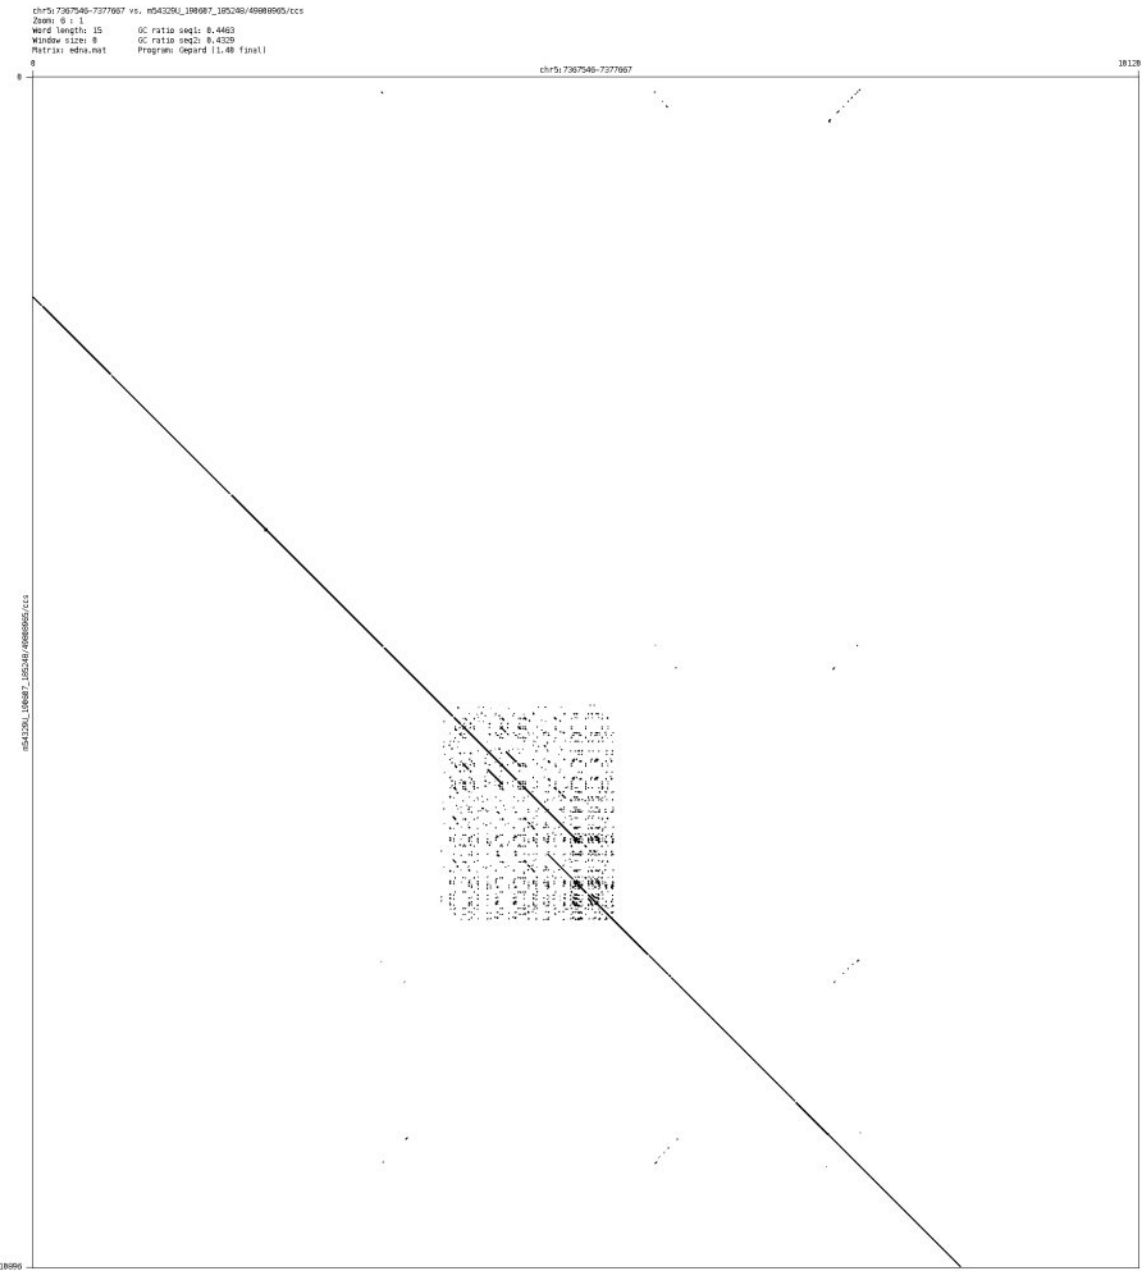

➤ chr5\_12425708\_12426759

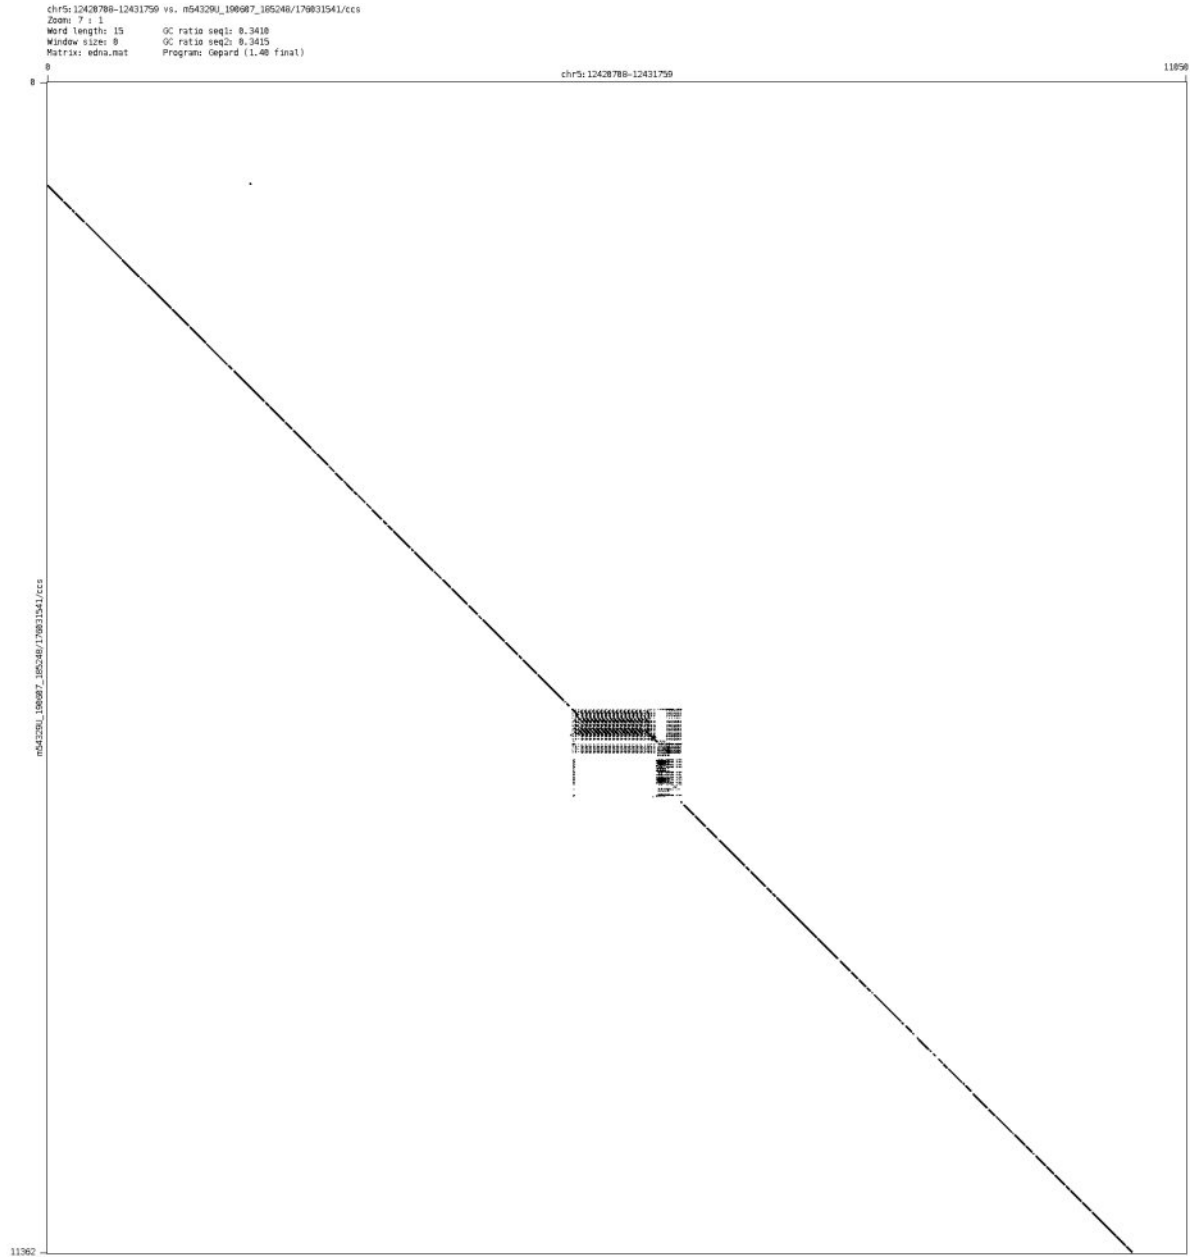

➤ chr5\_28932185\_28934937

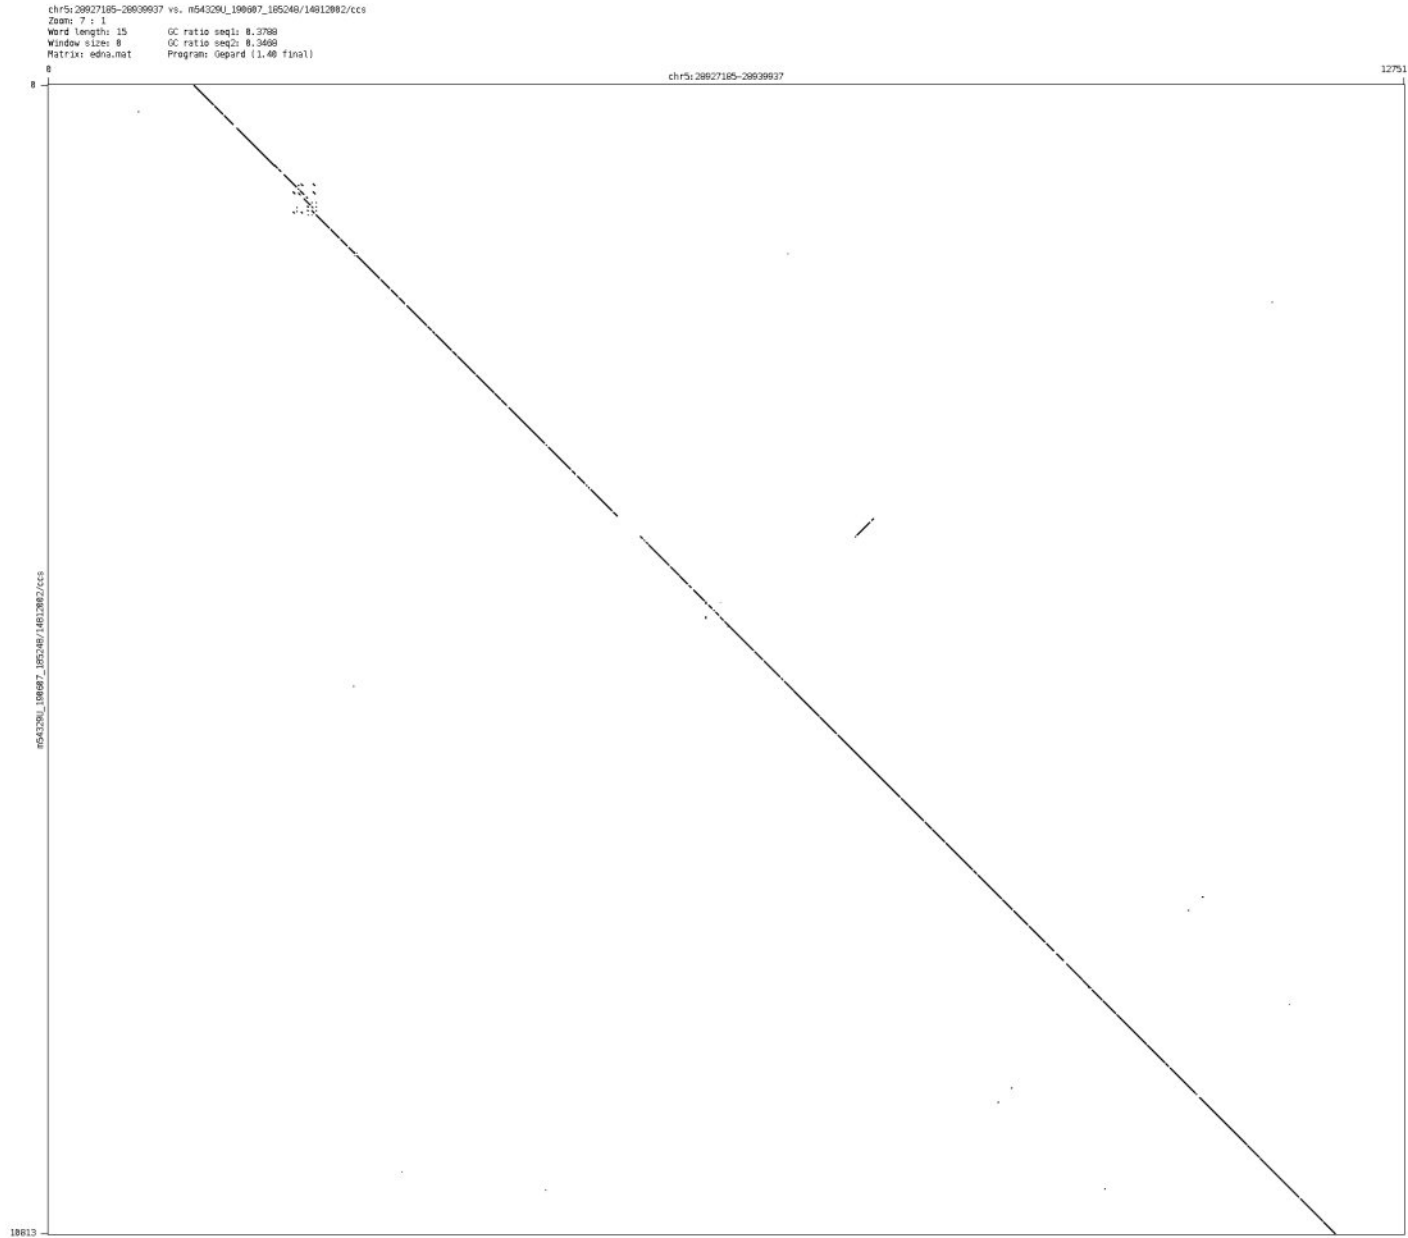



➤ chr5\_35708616\_35708706

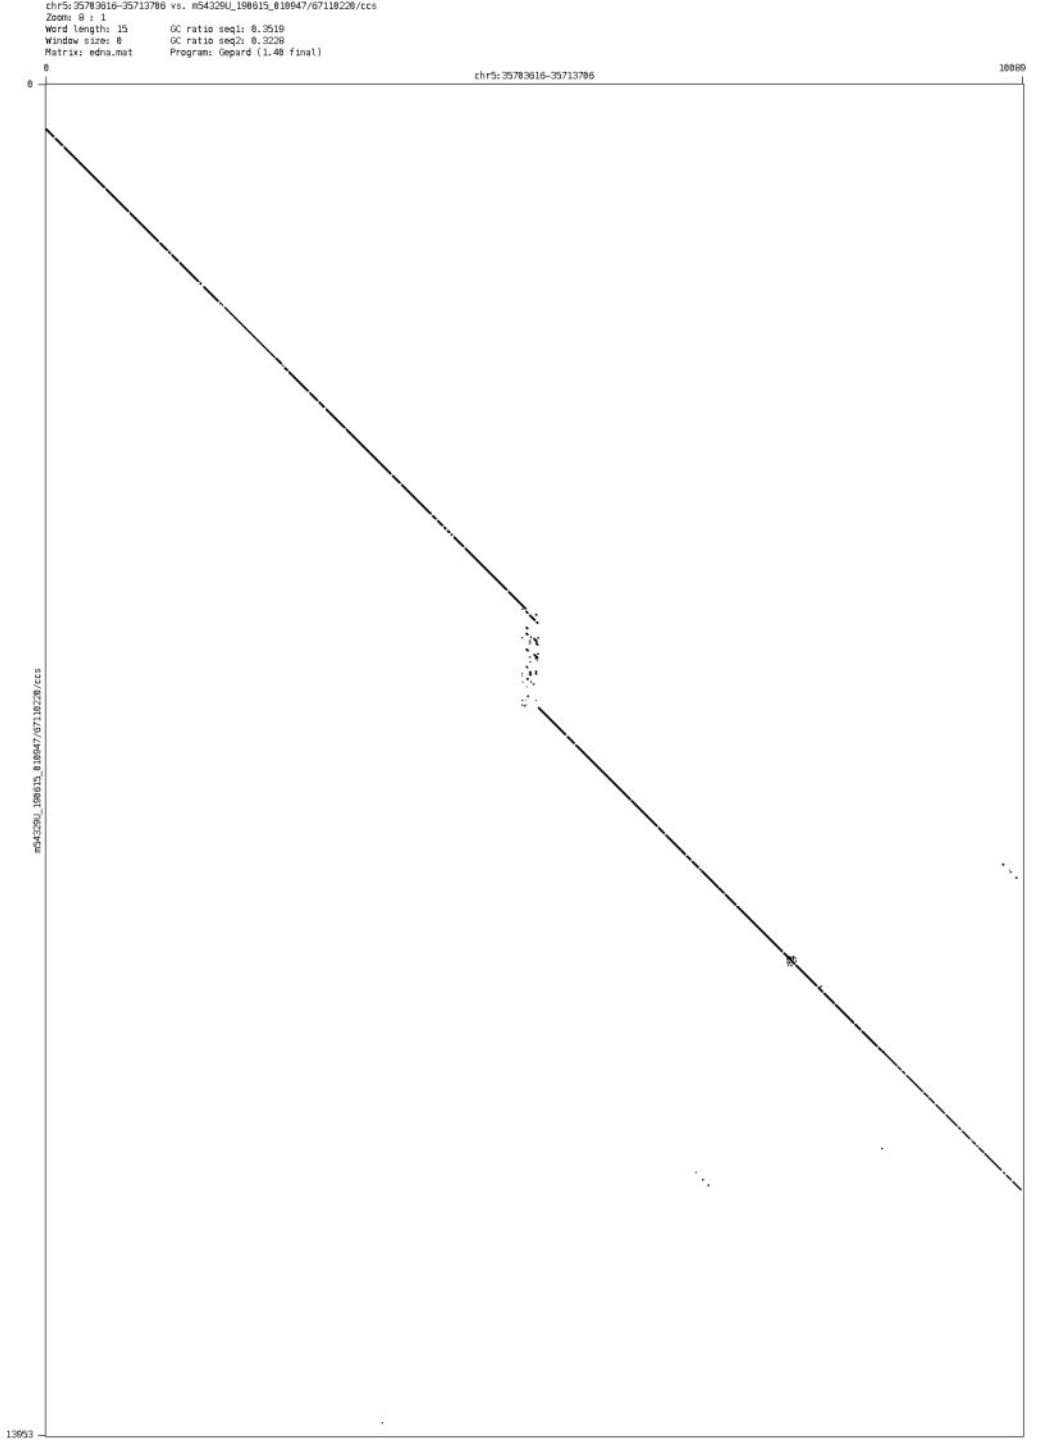

➤ chr5\_53826784\_53830121

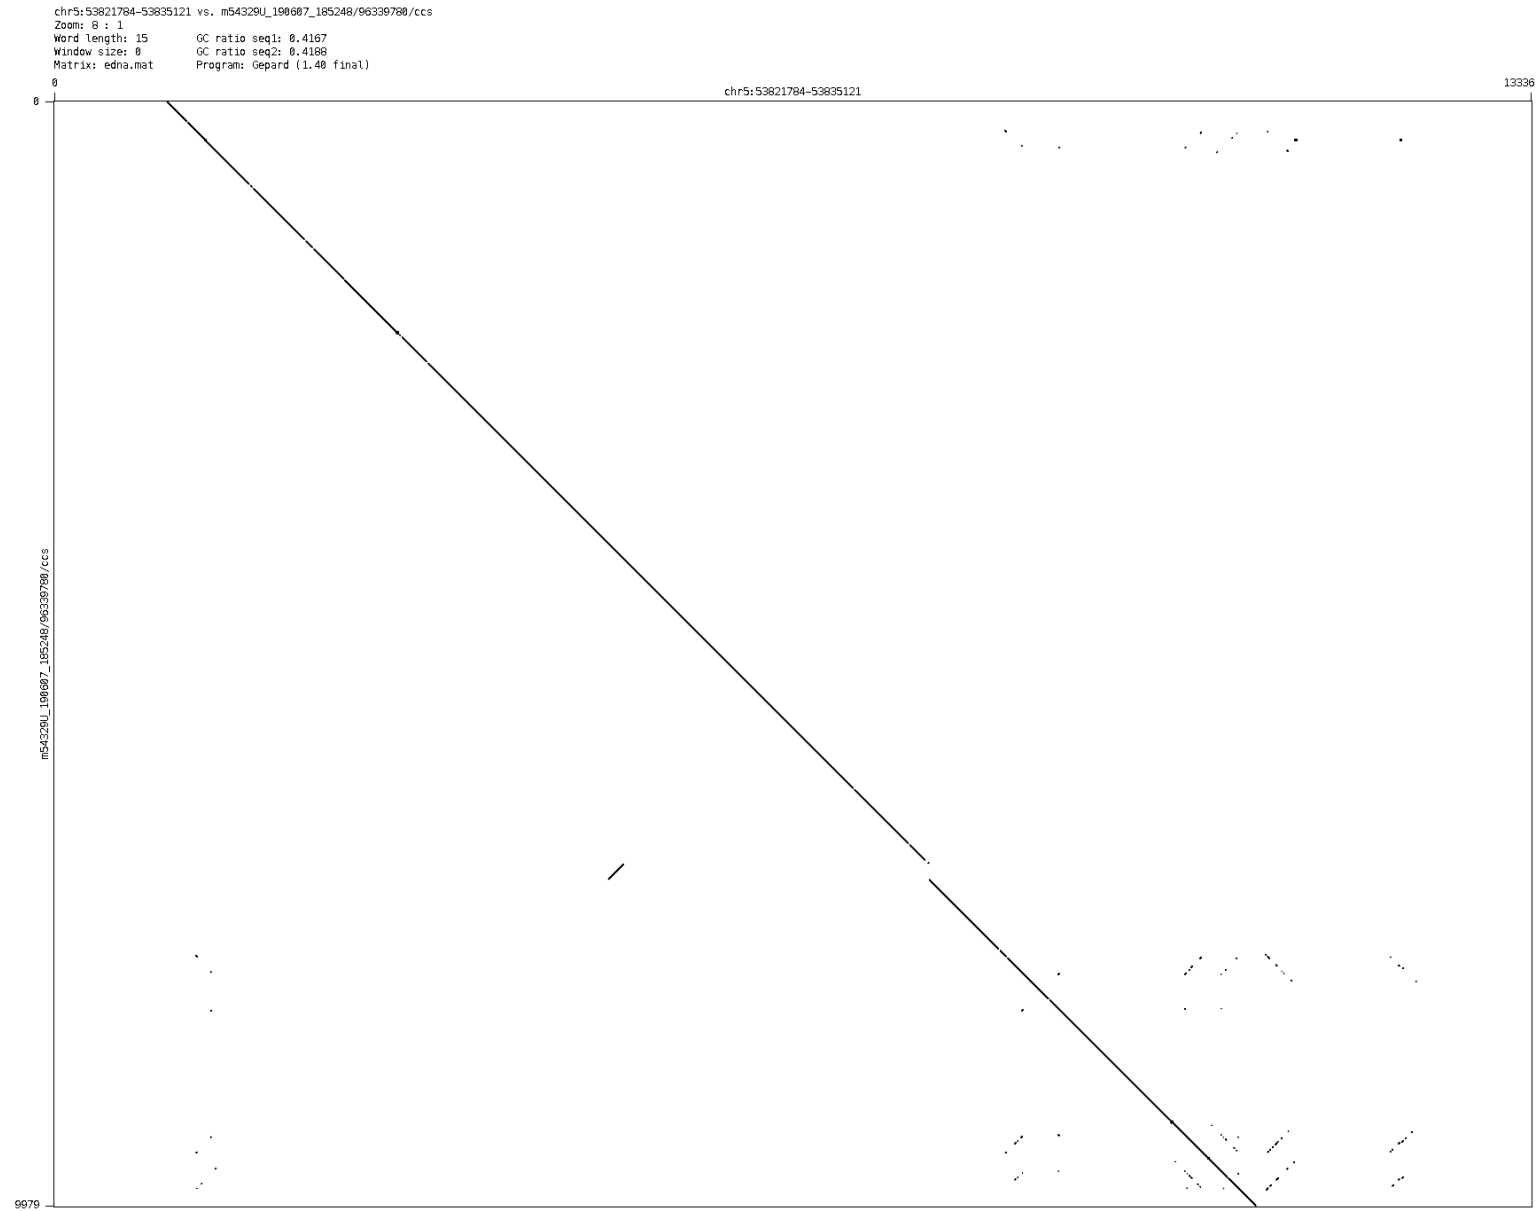

➤ chr5\_67326226\_67328703

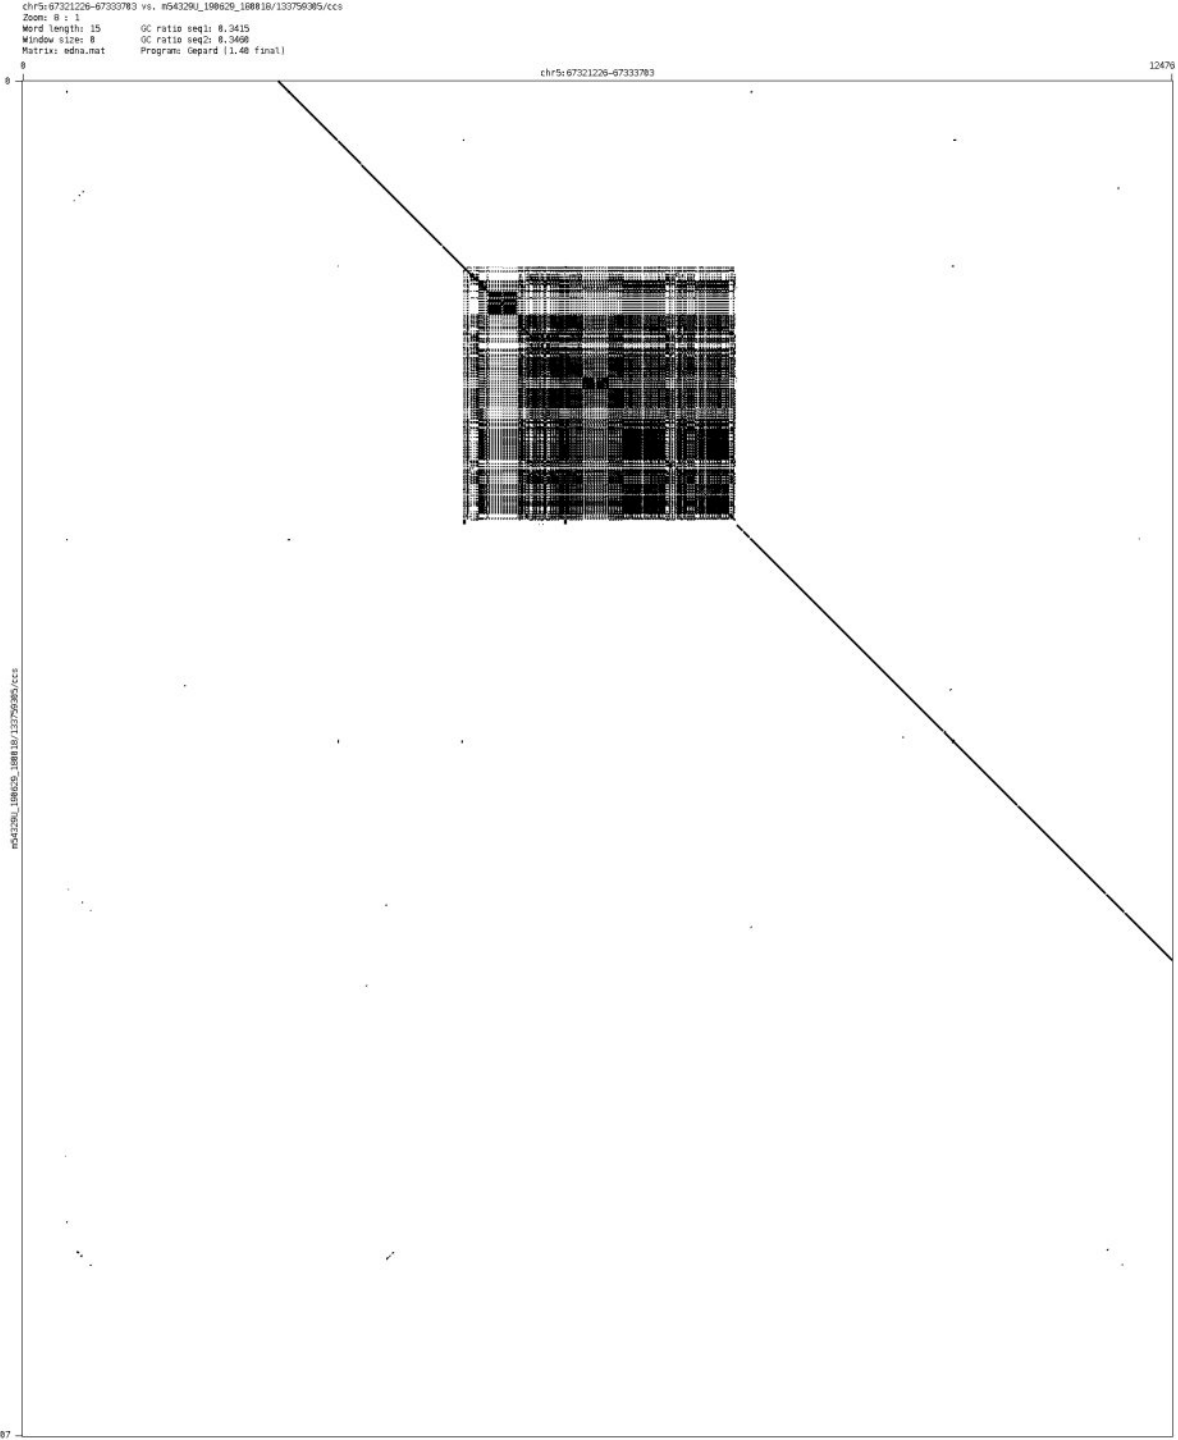

➤ chr5\_80692983\_80693579

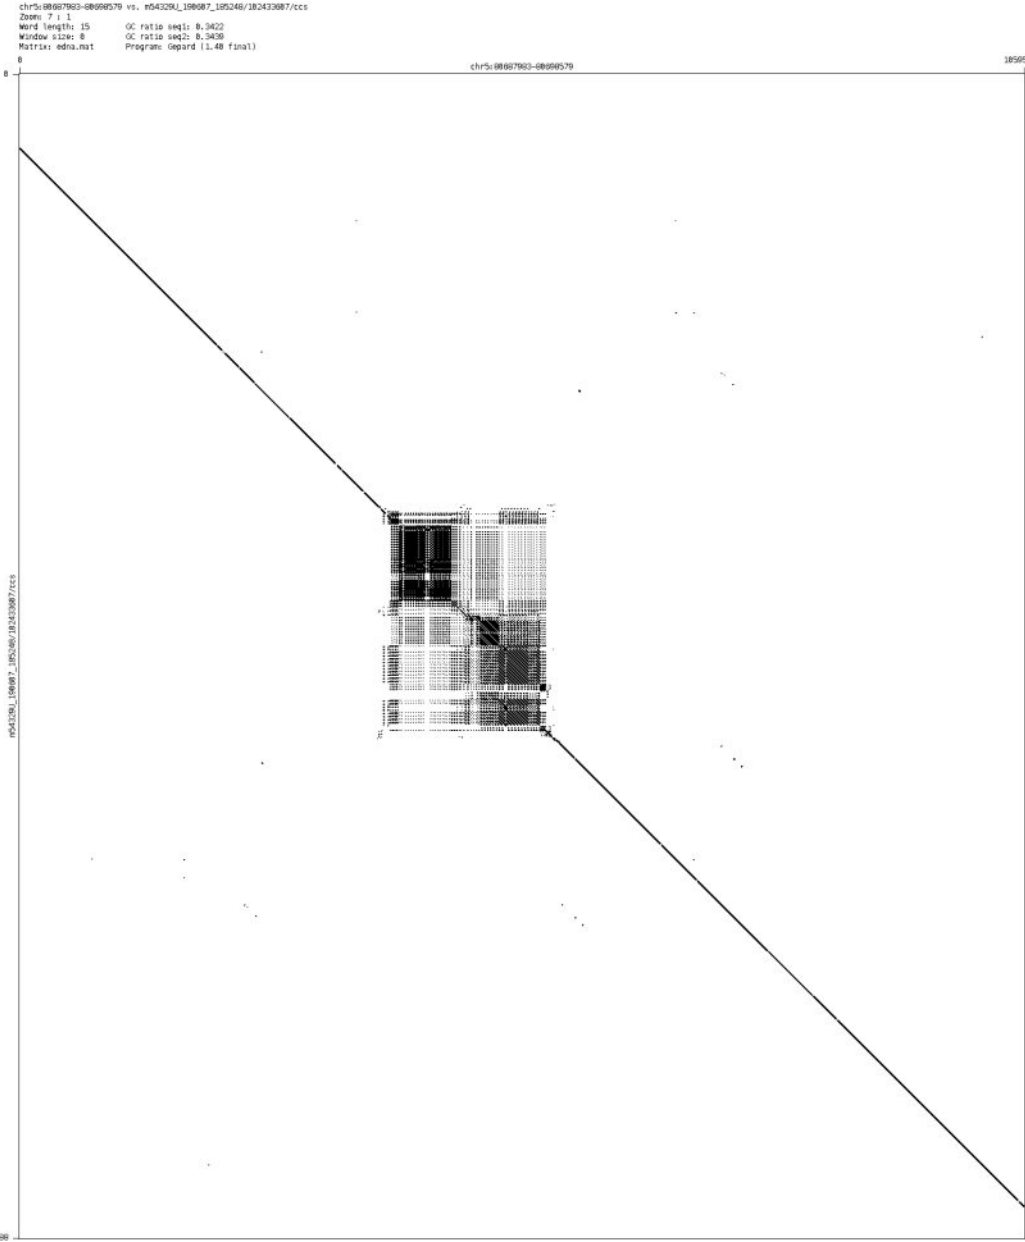

➤ chr5\_101087938\_101088040

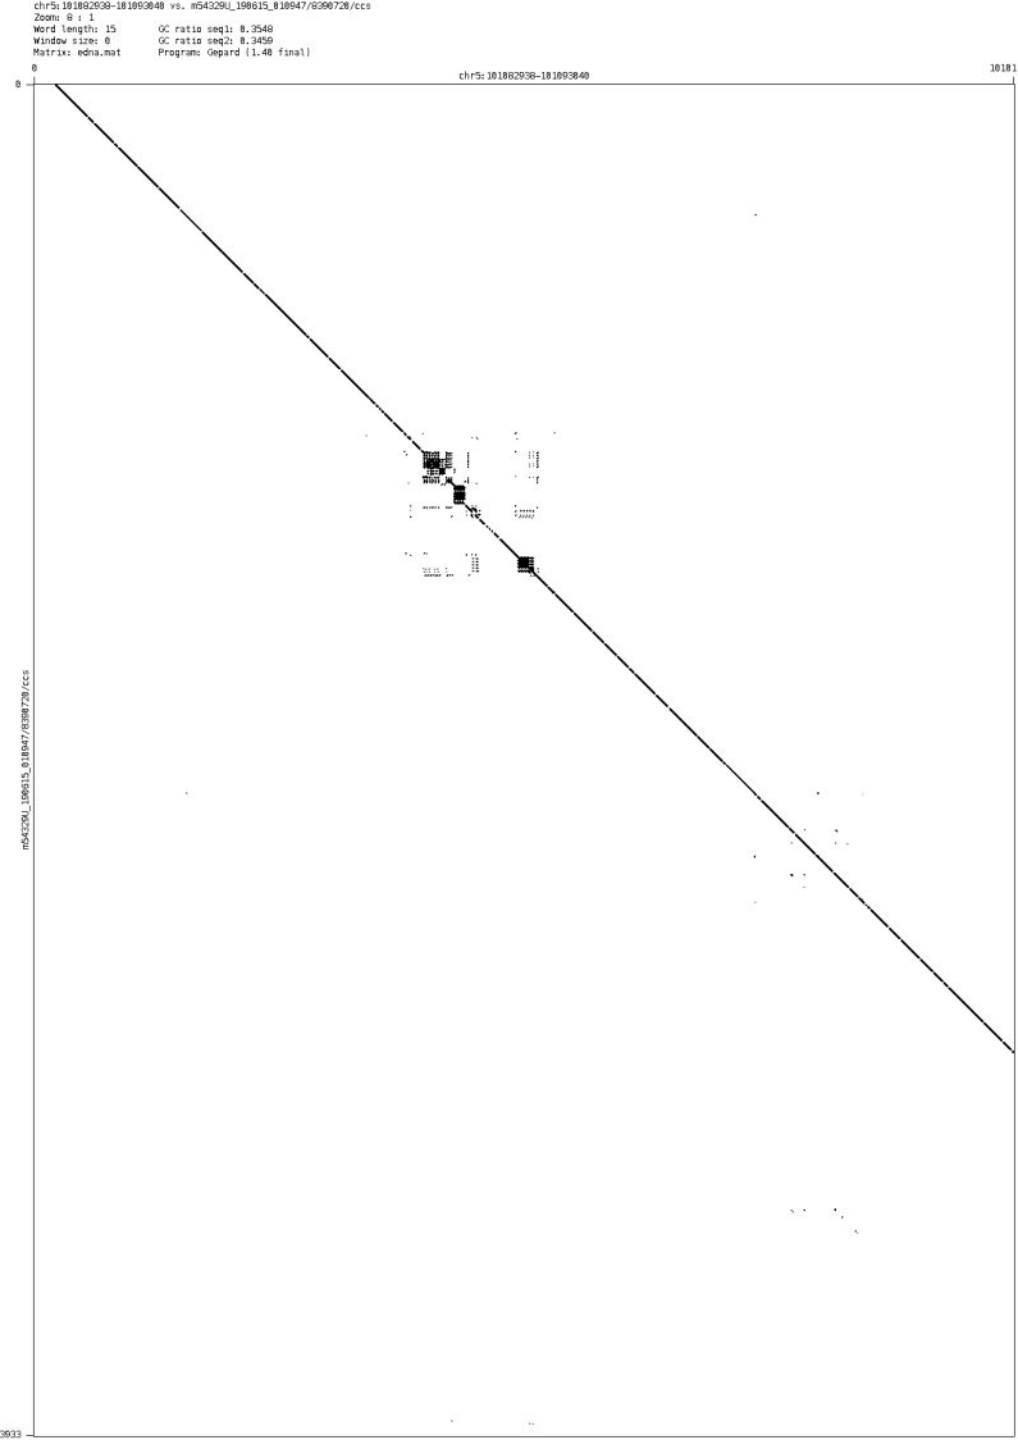

➤ chr5\_116010763\_116015366

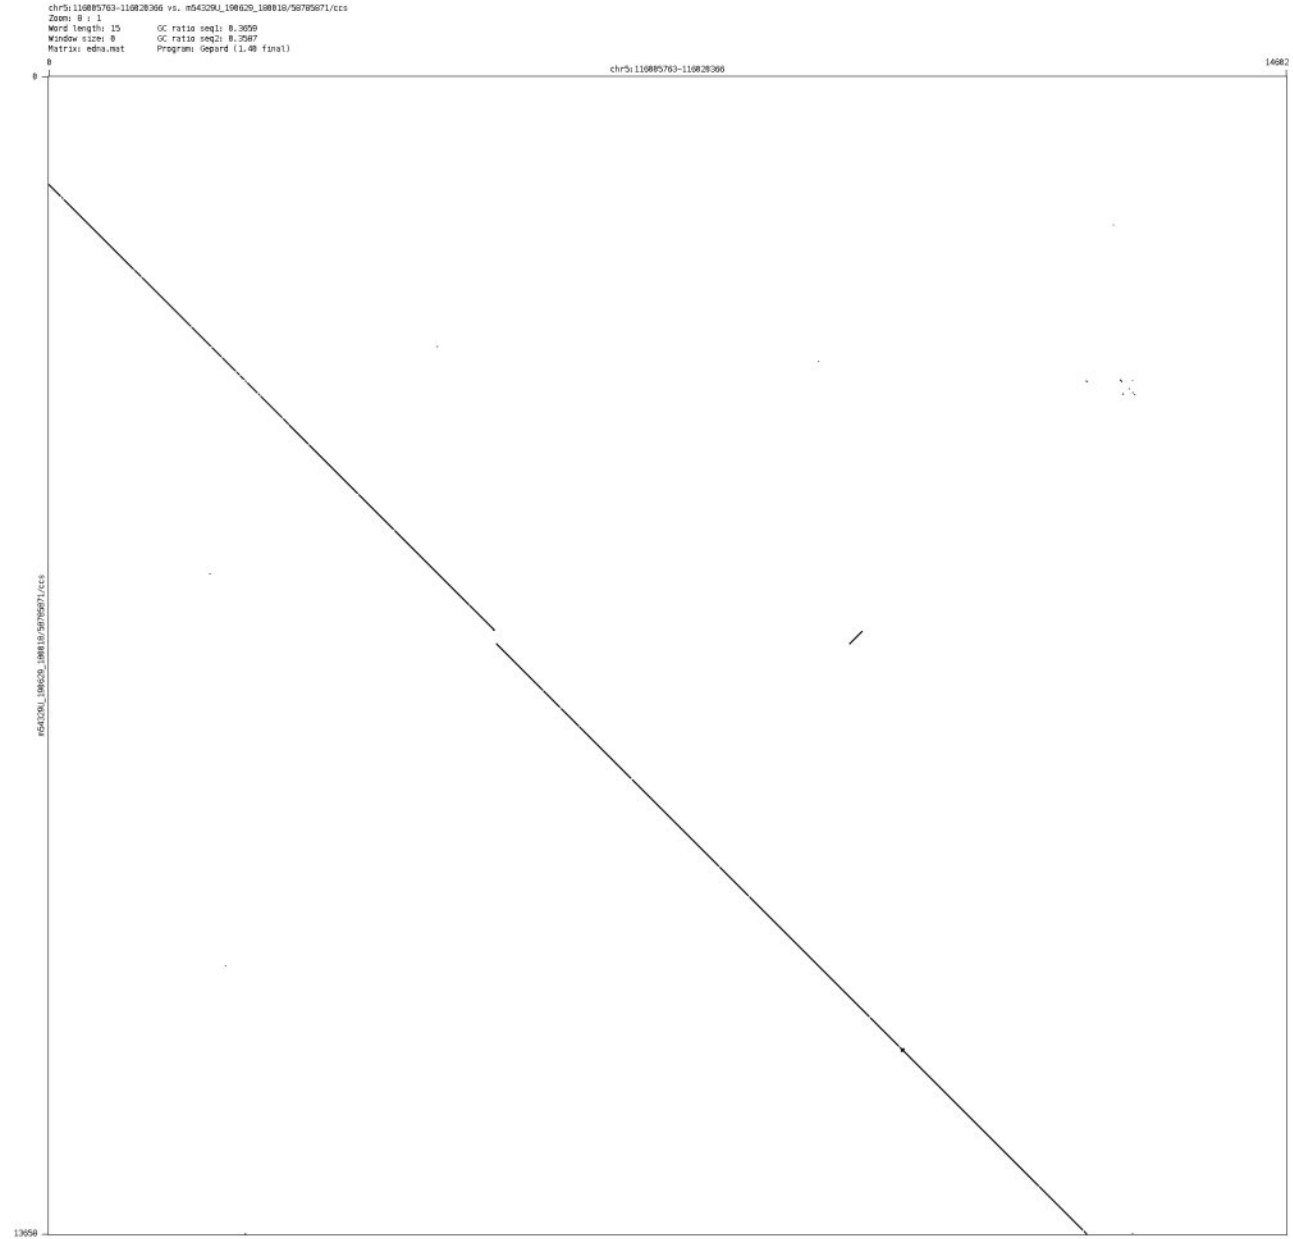

➤ chr5\_141480327\_141483116

chr5:141475327-141486116 vs. m54329U\_196615\_010947/11929153/ccs  
Zoom: 8 : 1  
Word length: 15 GC ratio seq1: 0.4838  
Window size: 0 GC ratio seq2: 0.5122  
Matrix: edna.mat Program: Gepard (1.40 final)

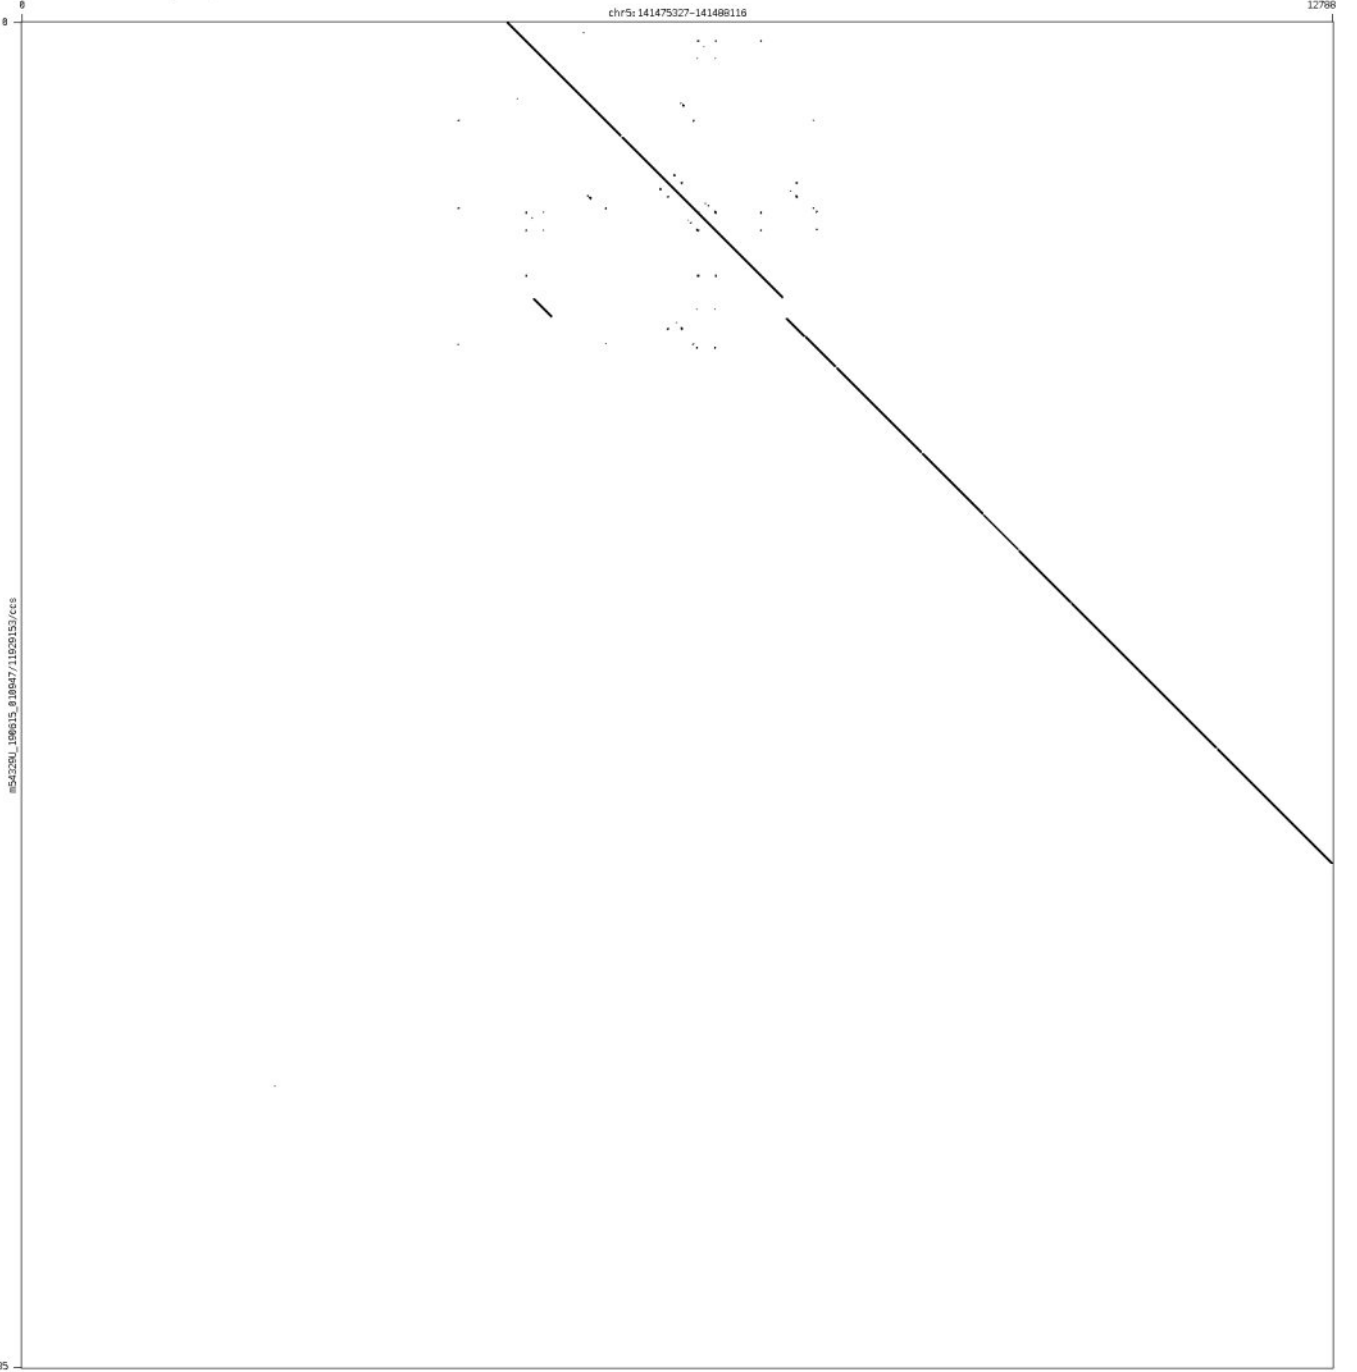

➤ chr5\_144132924\_144135827

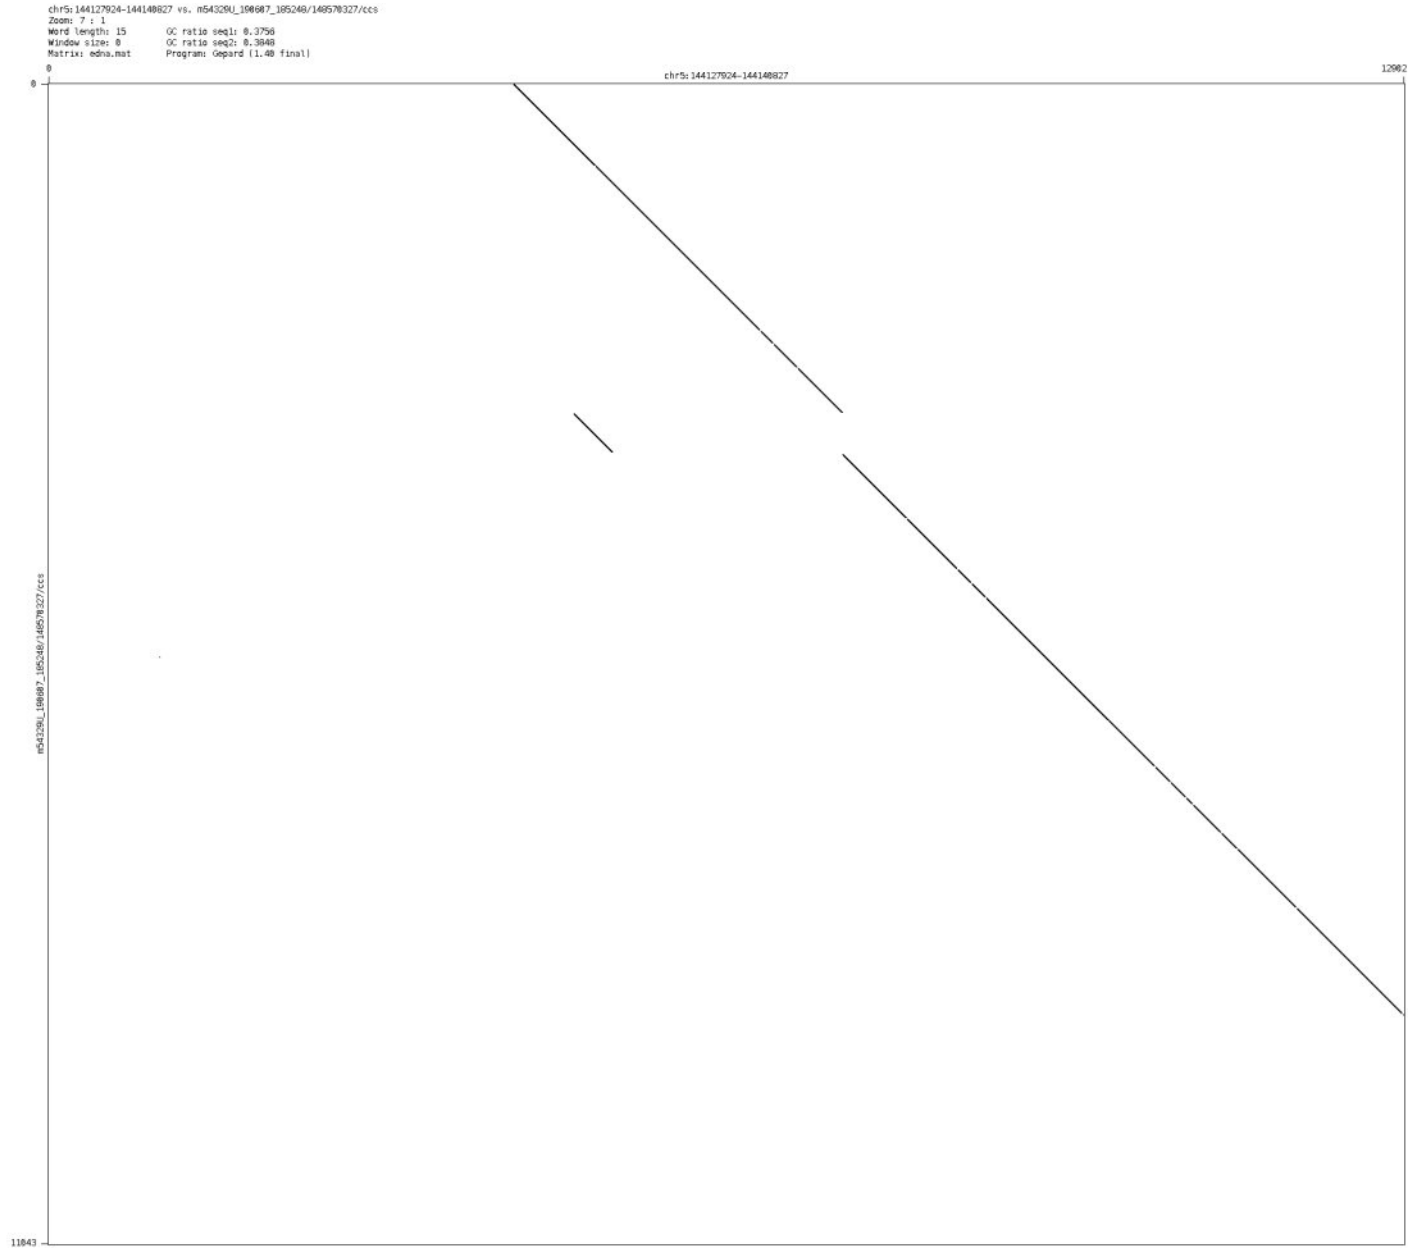



➤ chr5\_148173301\_148175687

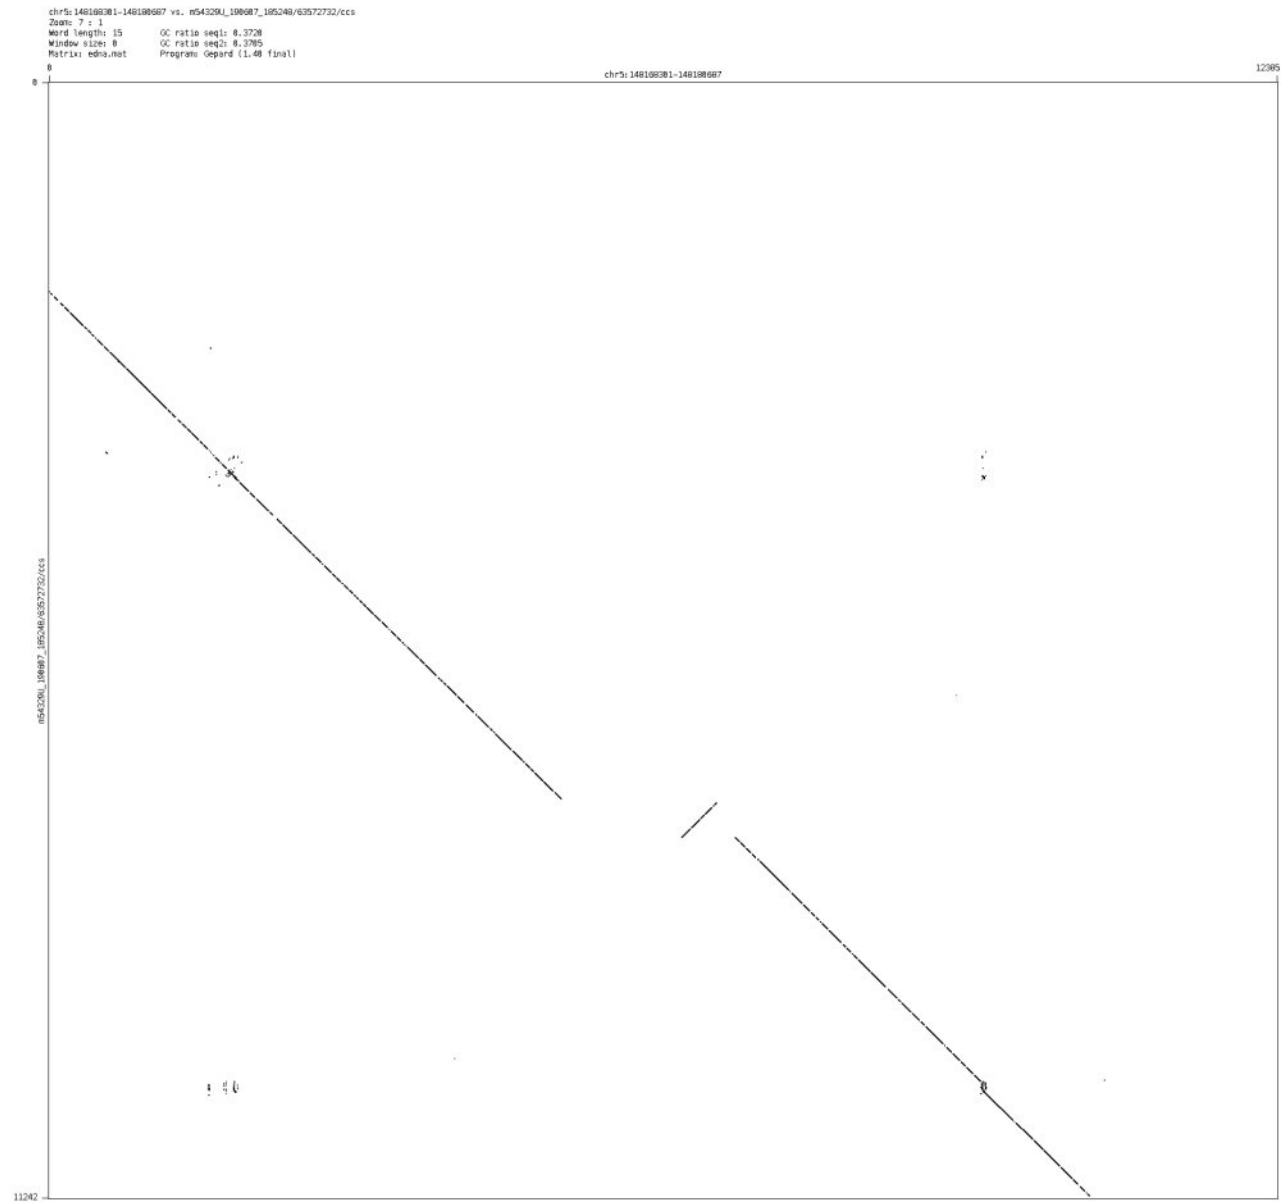

➤ chr5\_178585514\_178585658

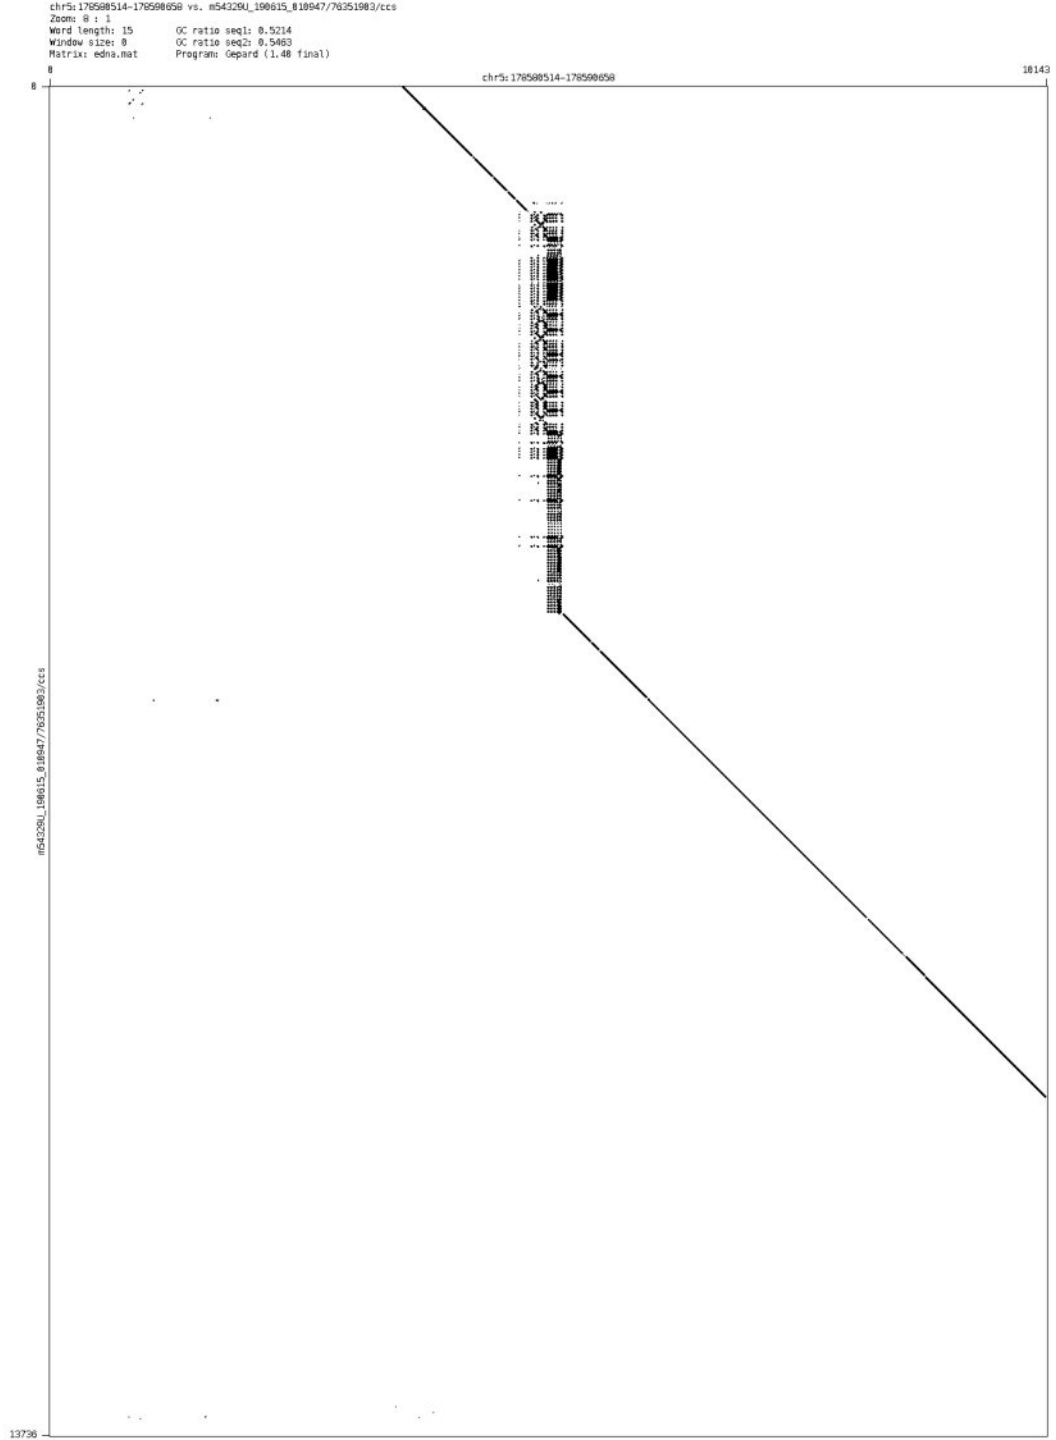

➤ chr5\_180634930\_180635915

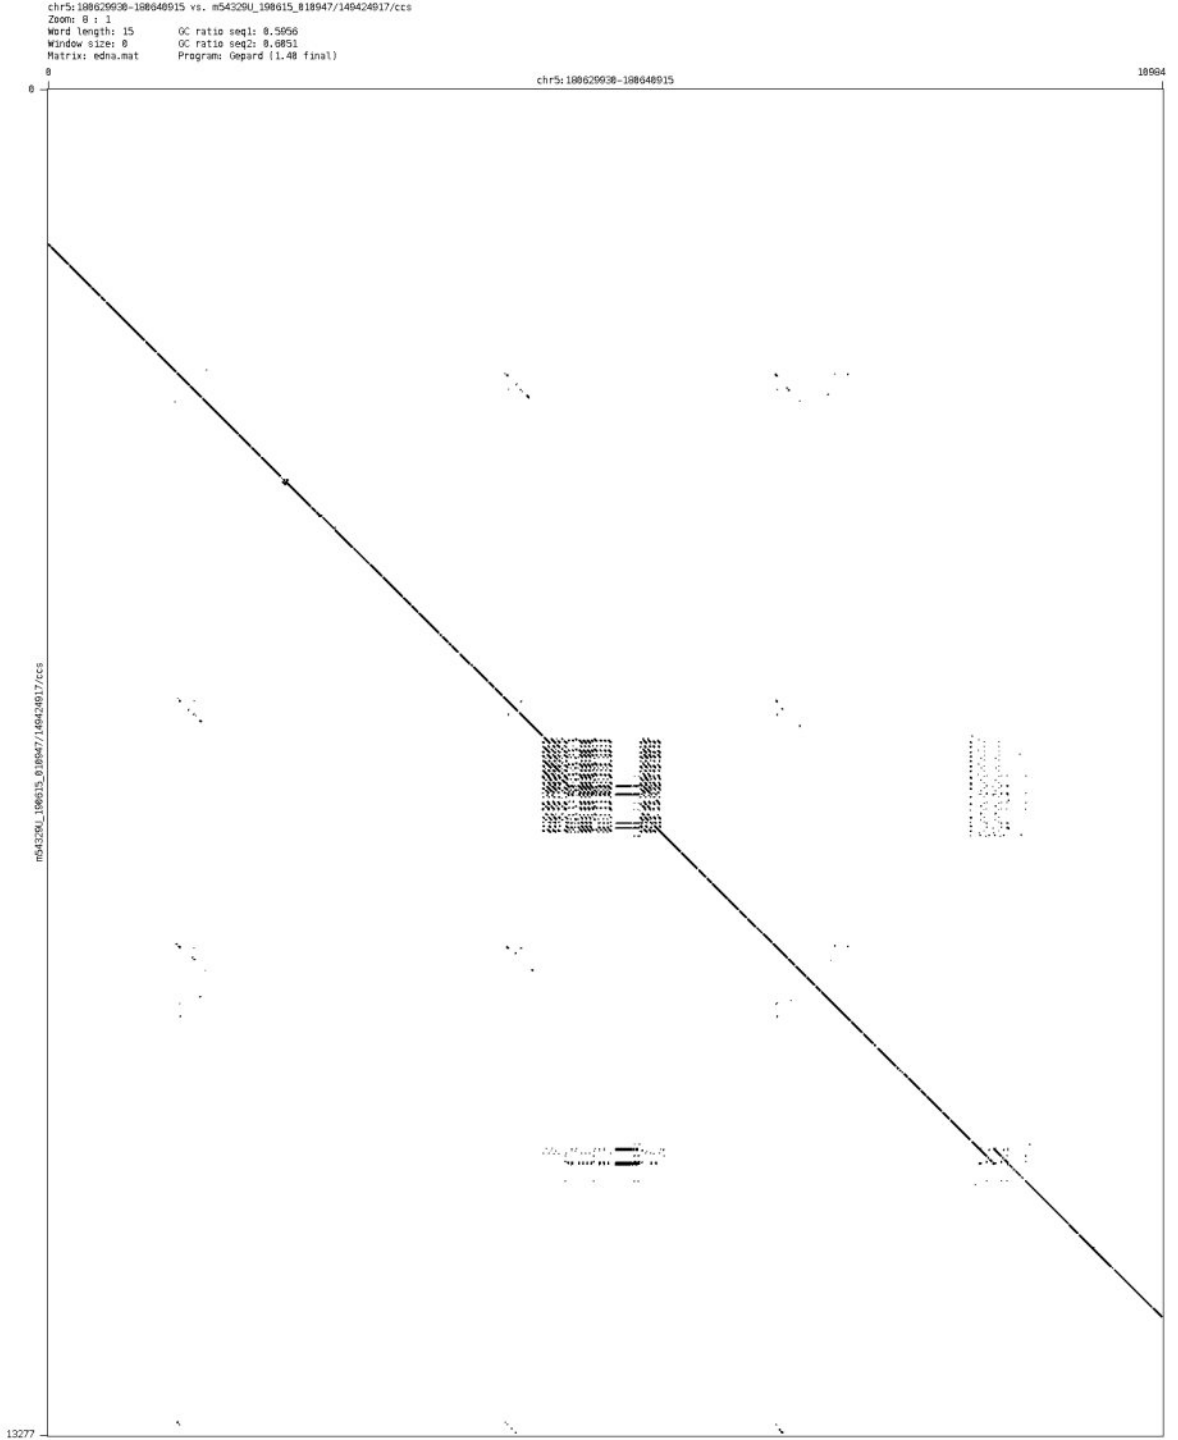

➤ chr6\_372042\_372248

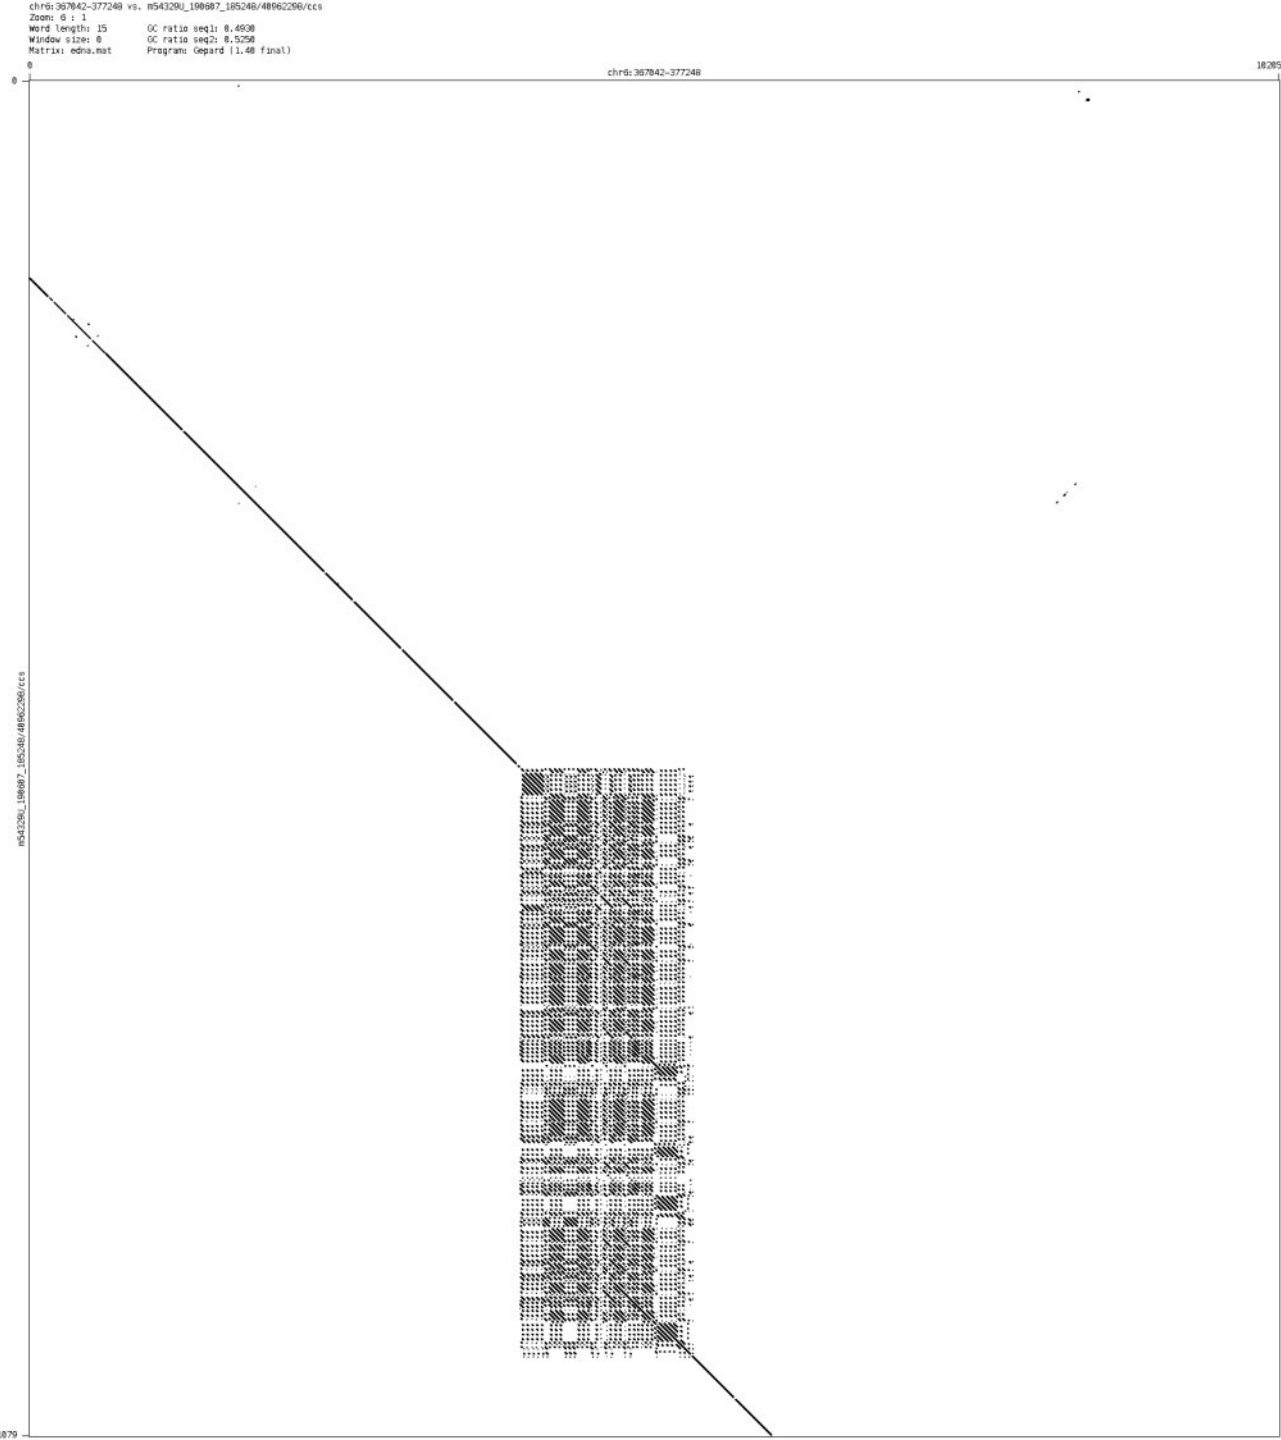

➤ chr6\_2504753\_2504887

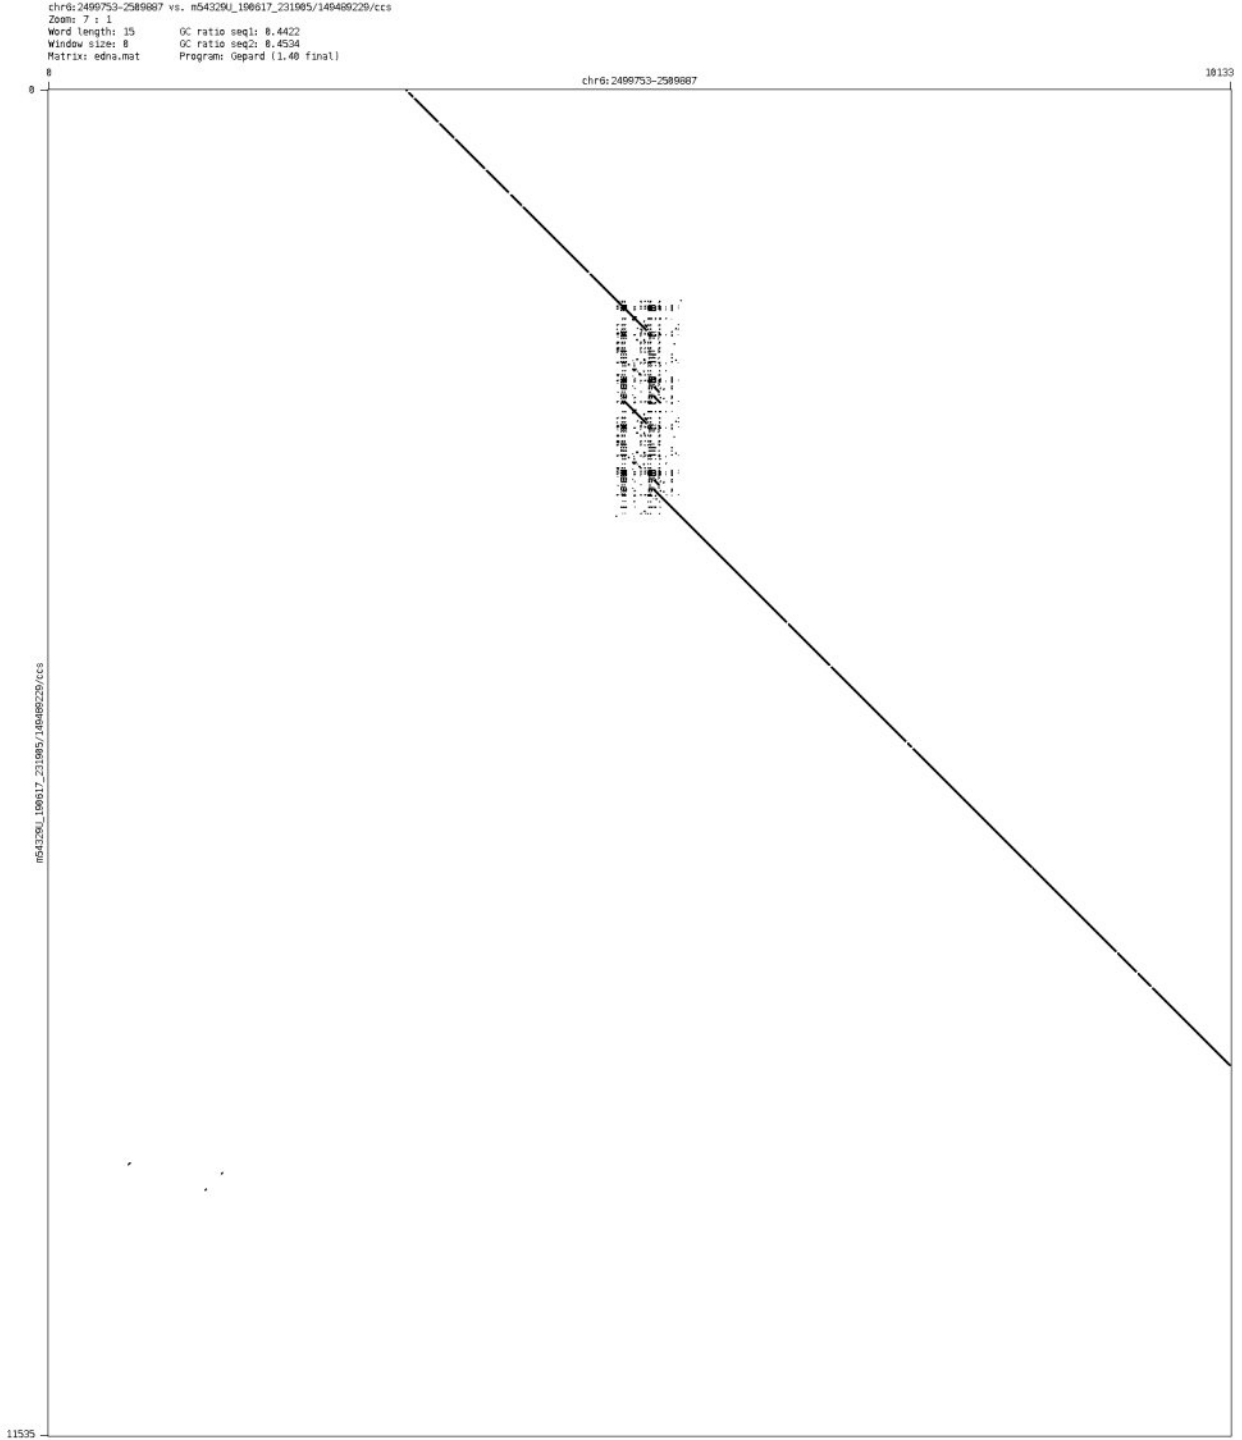

➤ chr6\_3222124\_3222284

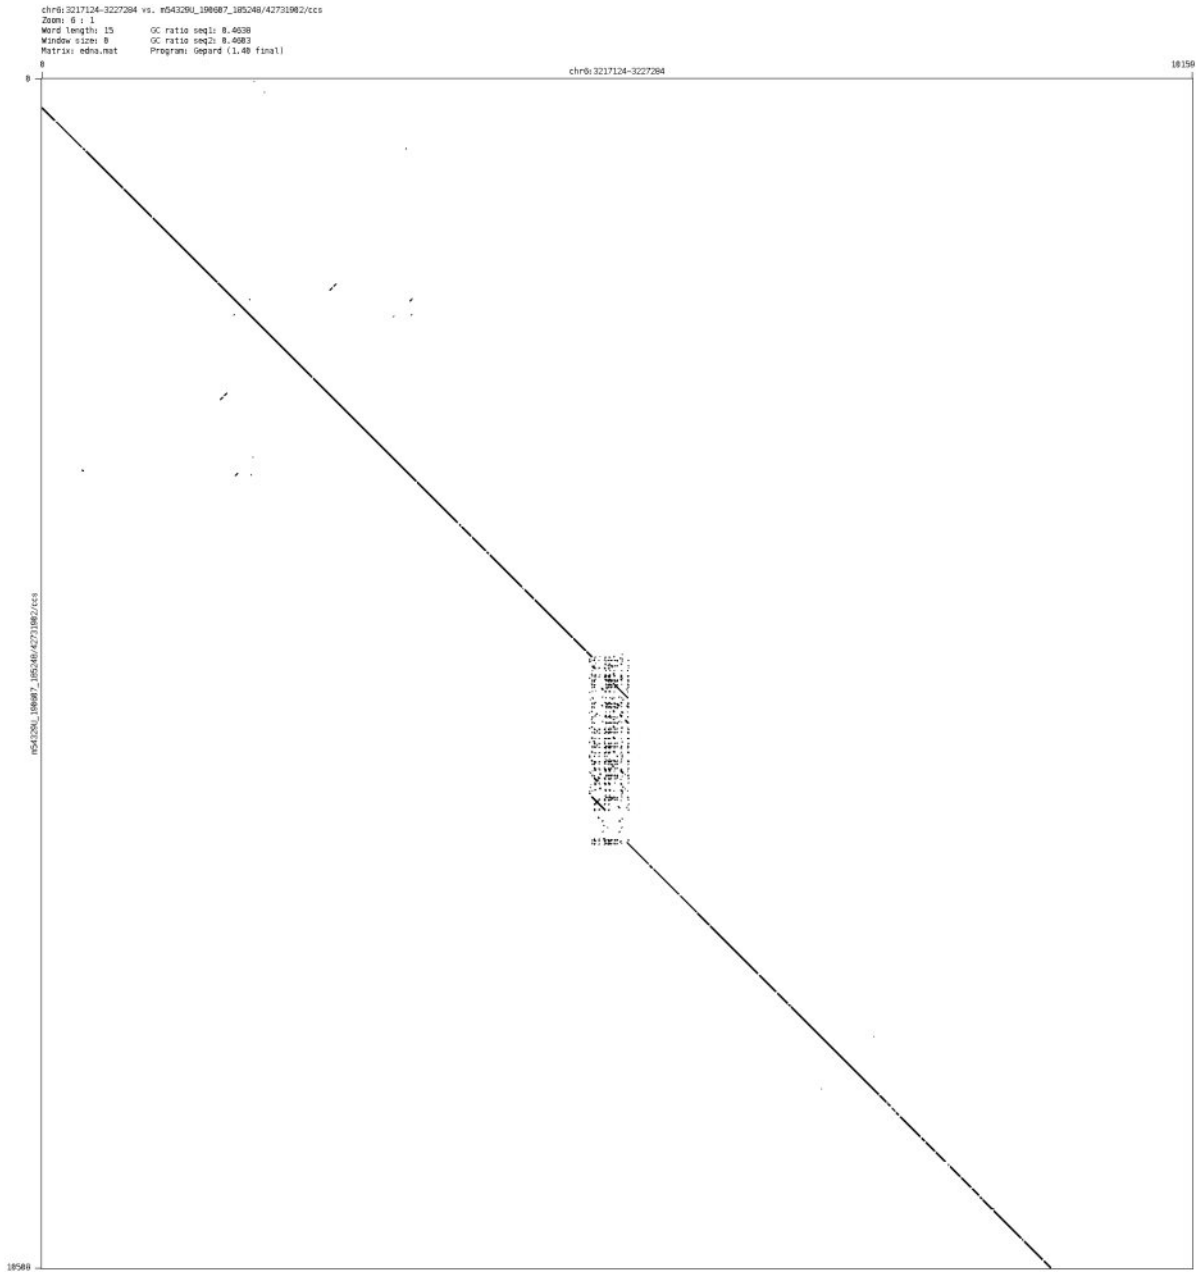

➤ chr6\_28054362\_28055446

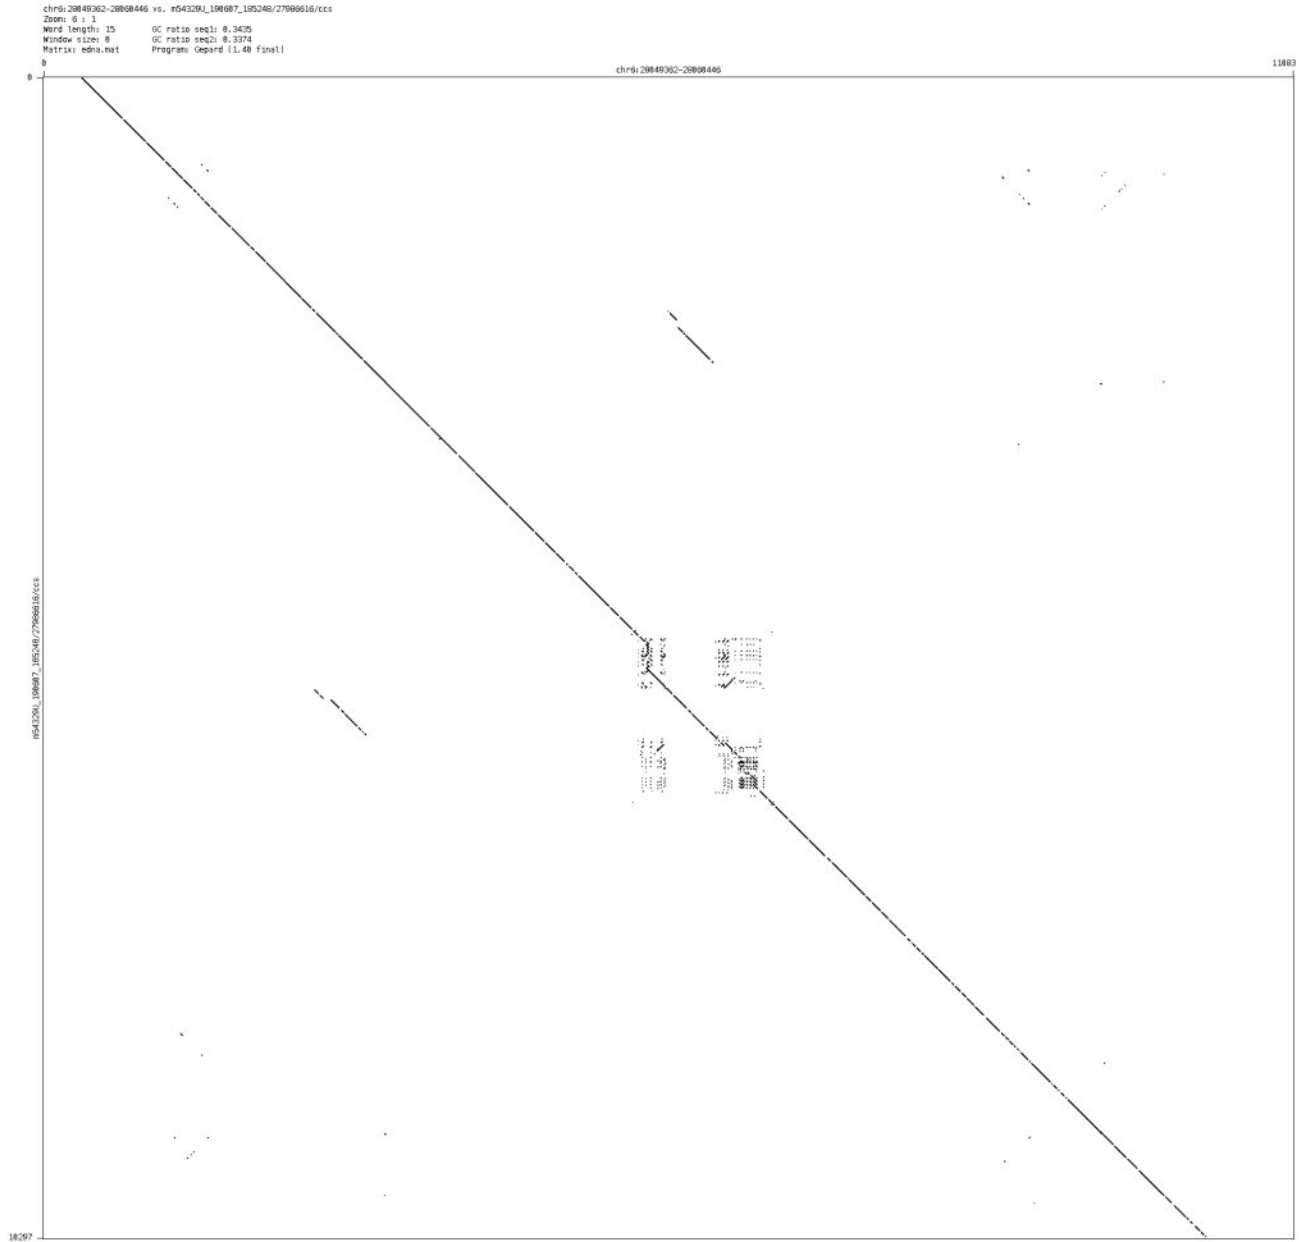

➤ chr6\_31428235\_31429956

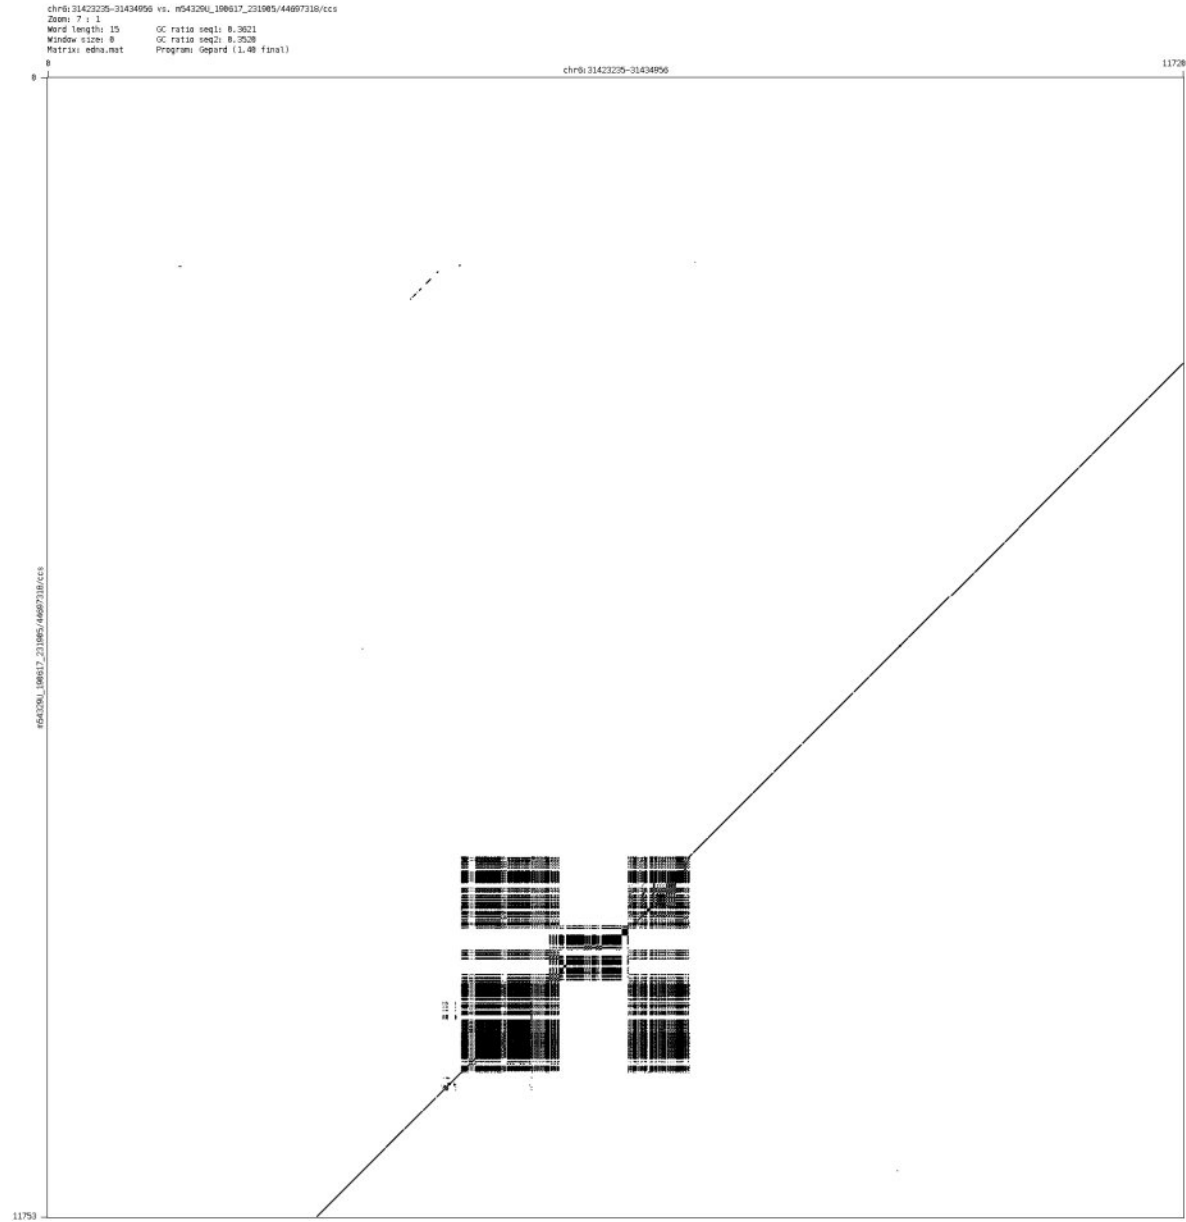



➤ chr6\_34071455\_34072974

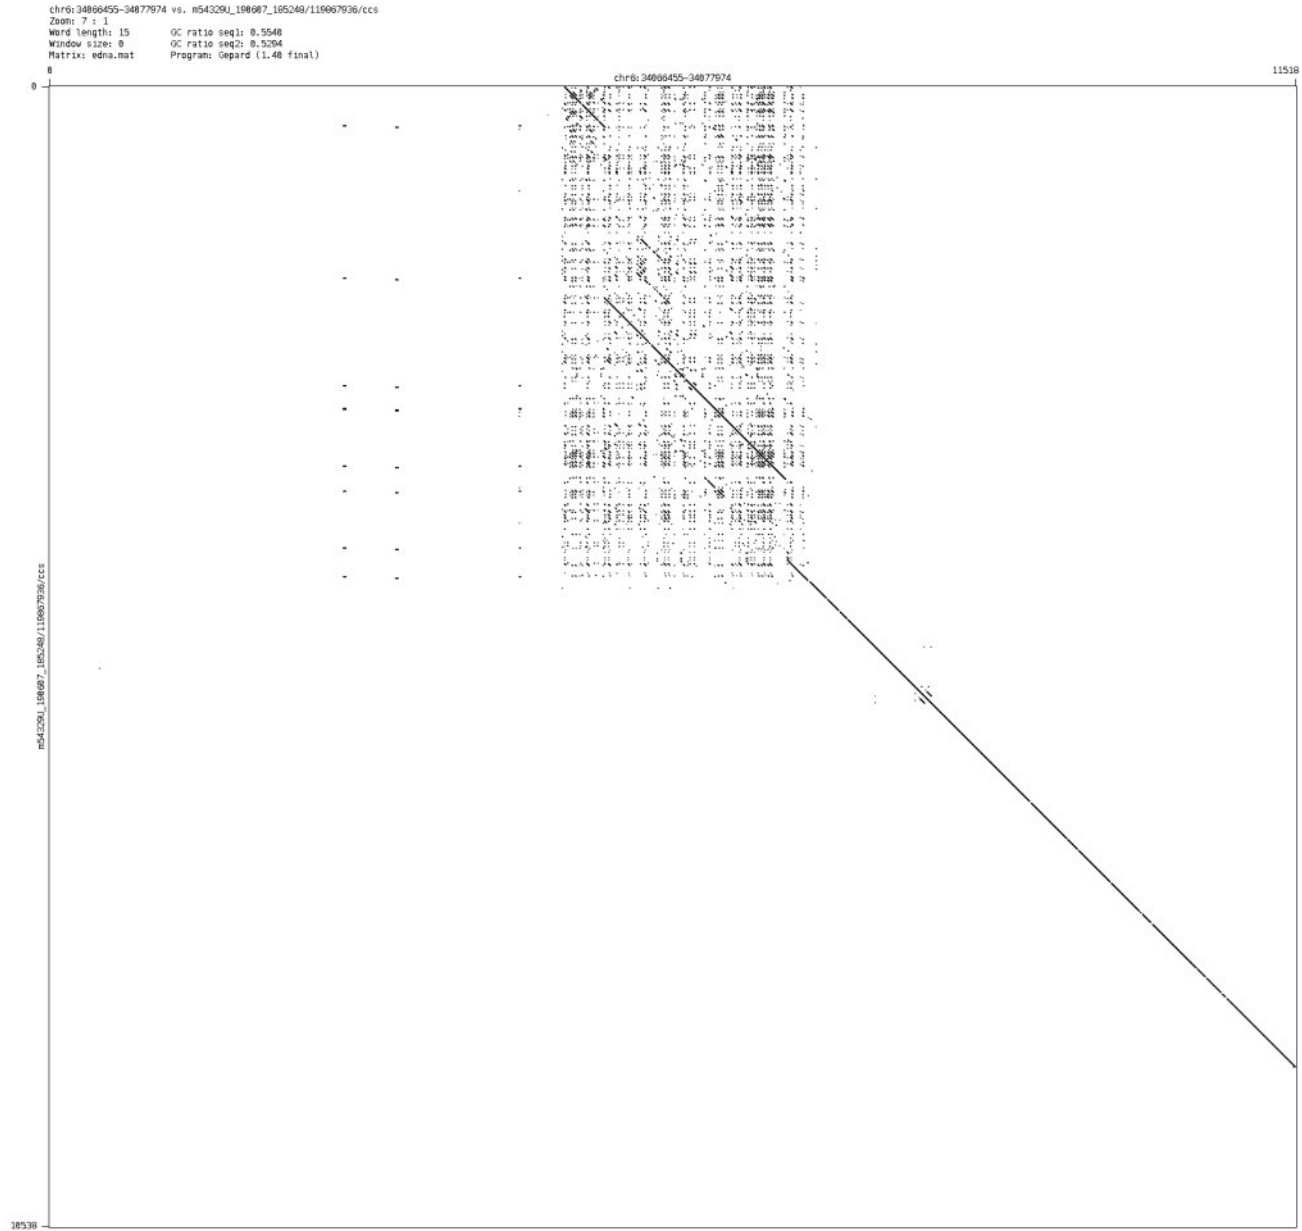

➤ chr6\_35169659\_35169798

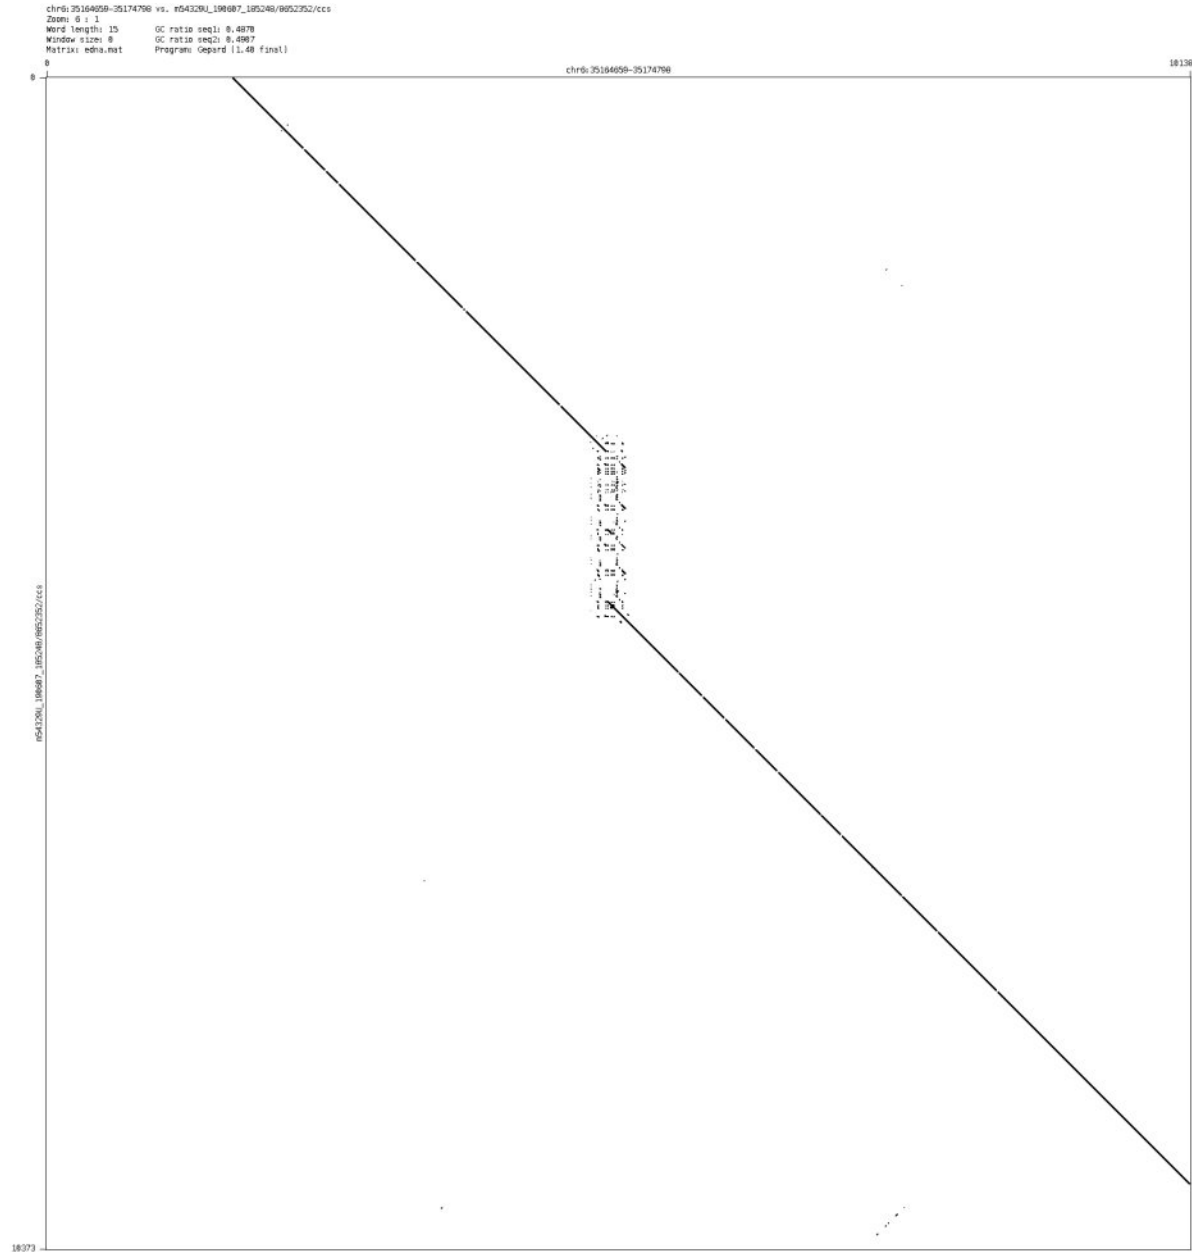

➤ chr6\_44044655\_44045175

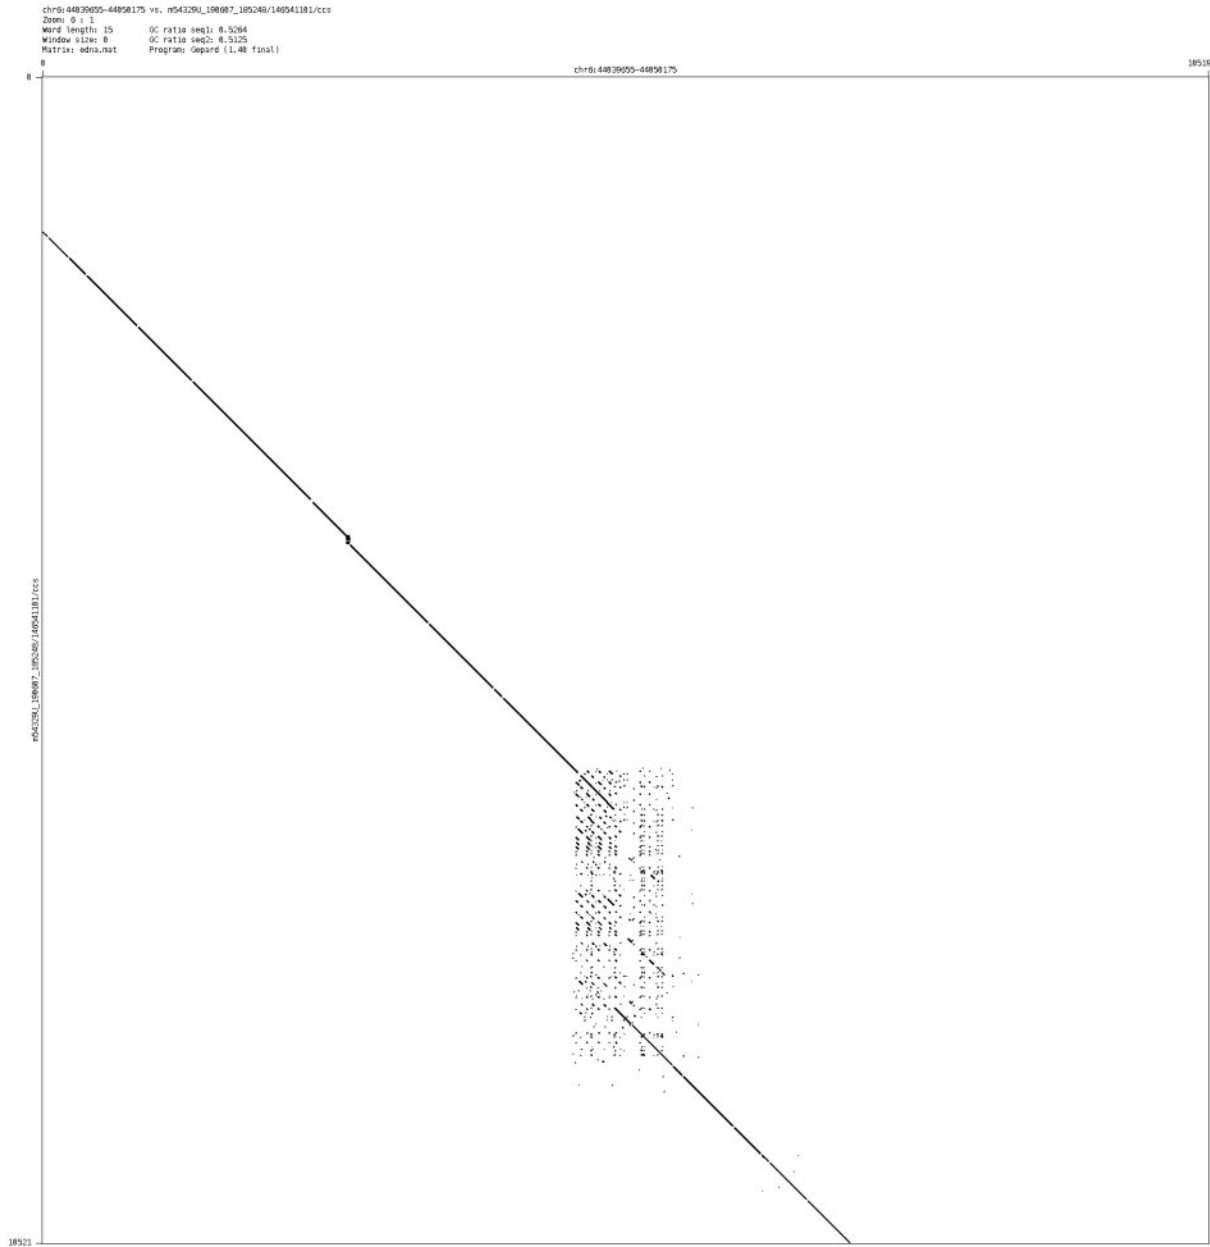

➤ chr6\_54059863\_54070121

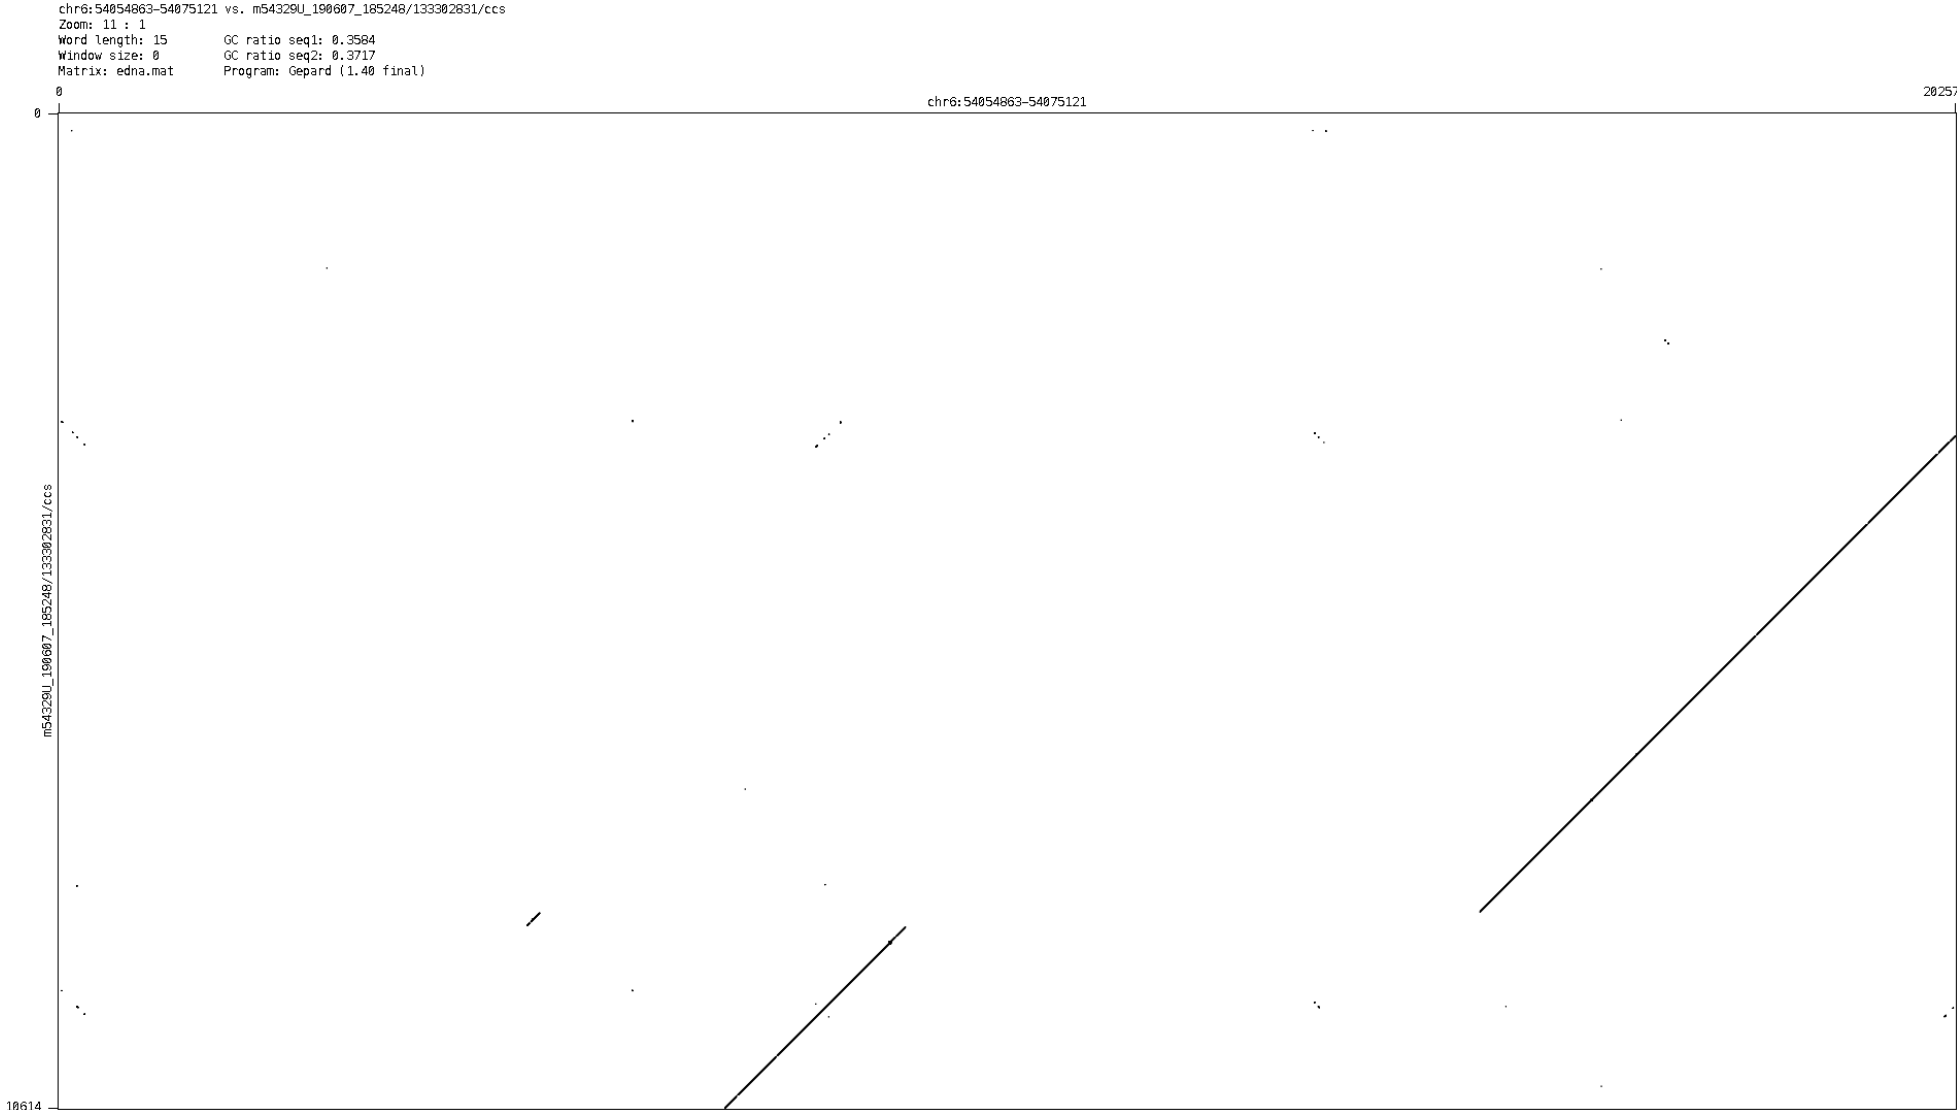

➤ chr6\_89211609\_89214231

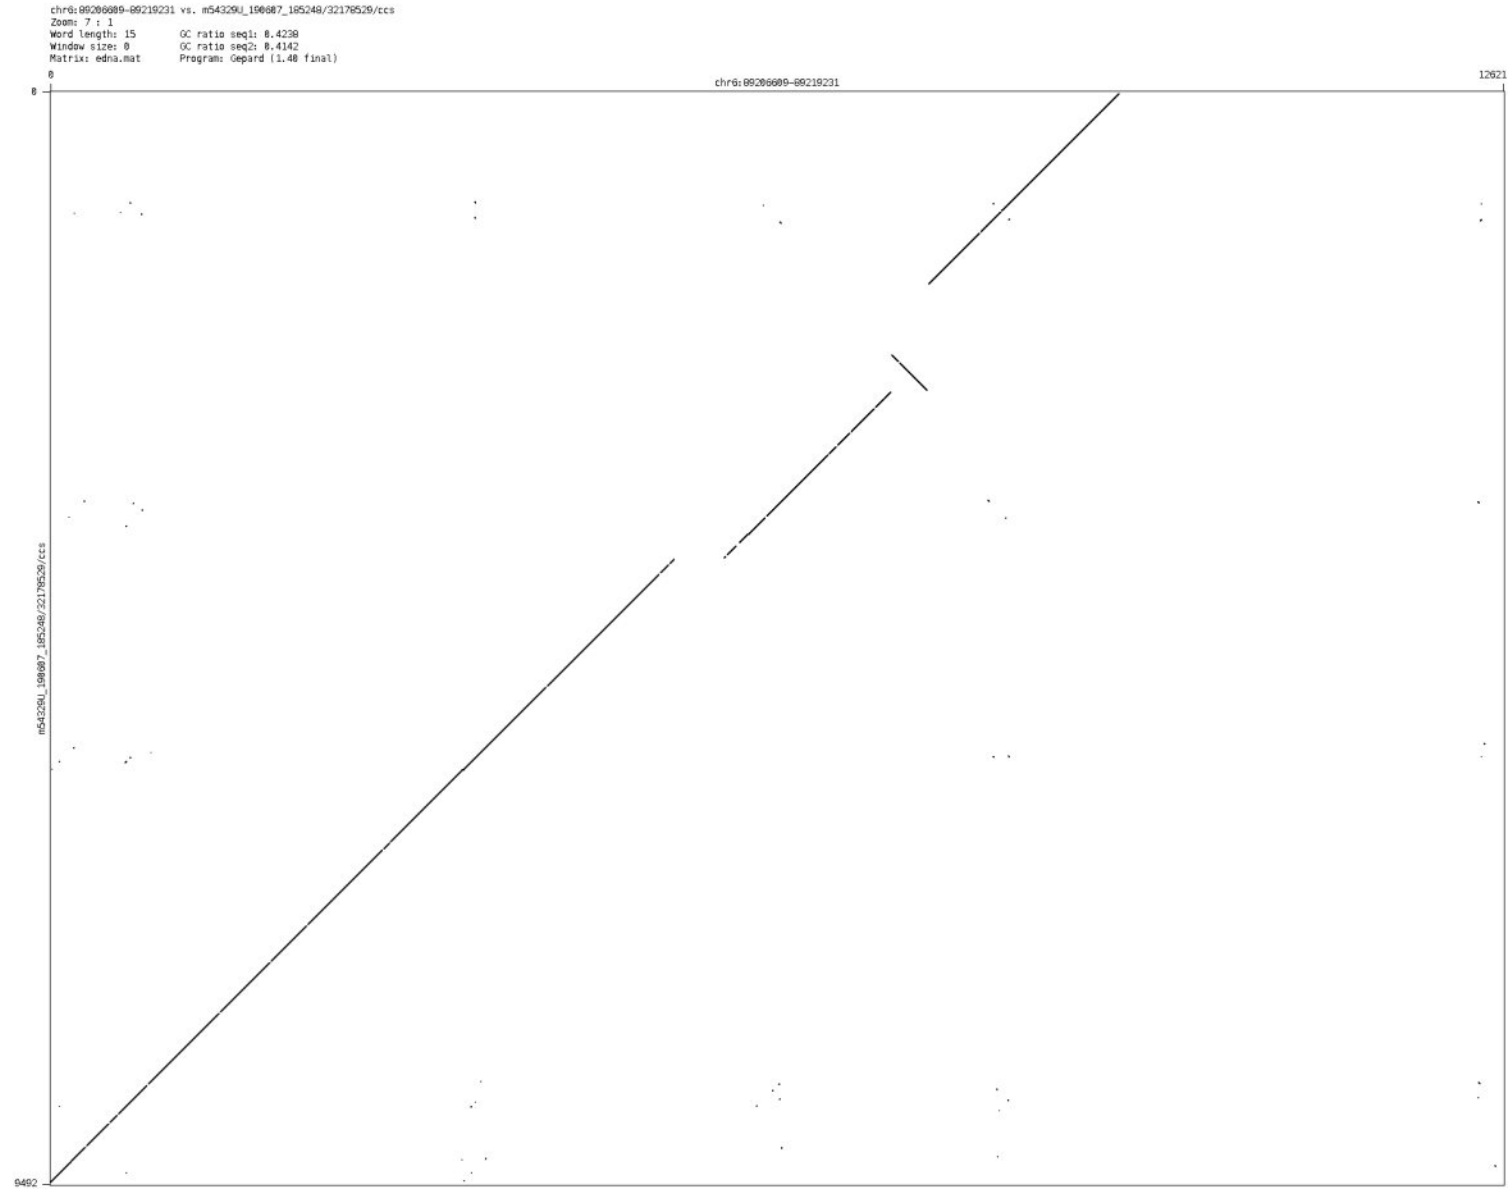

➤ chr6\_117923609\_117924524

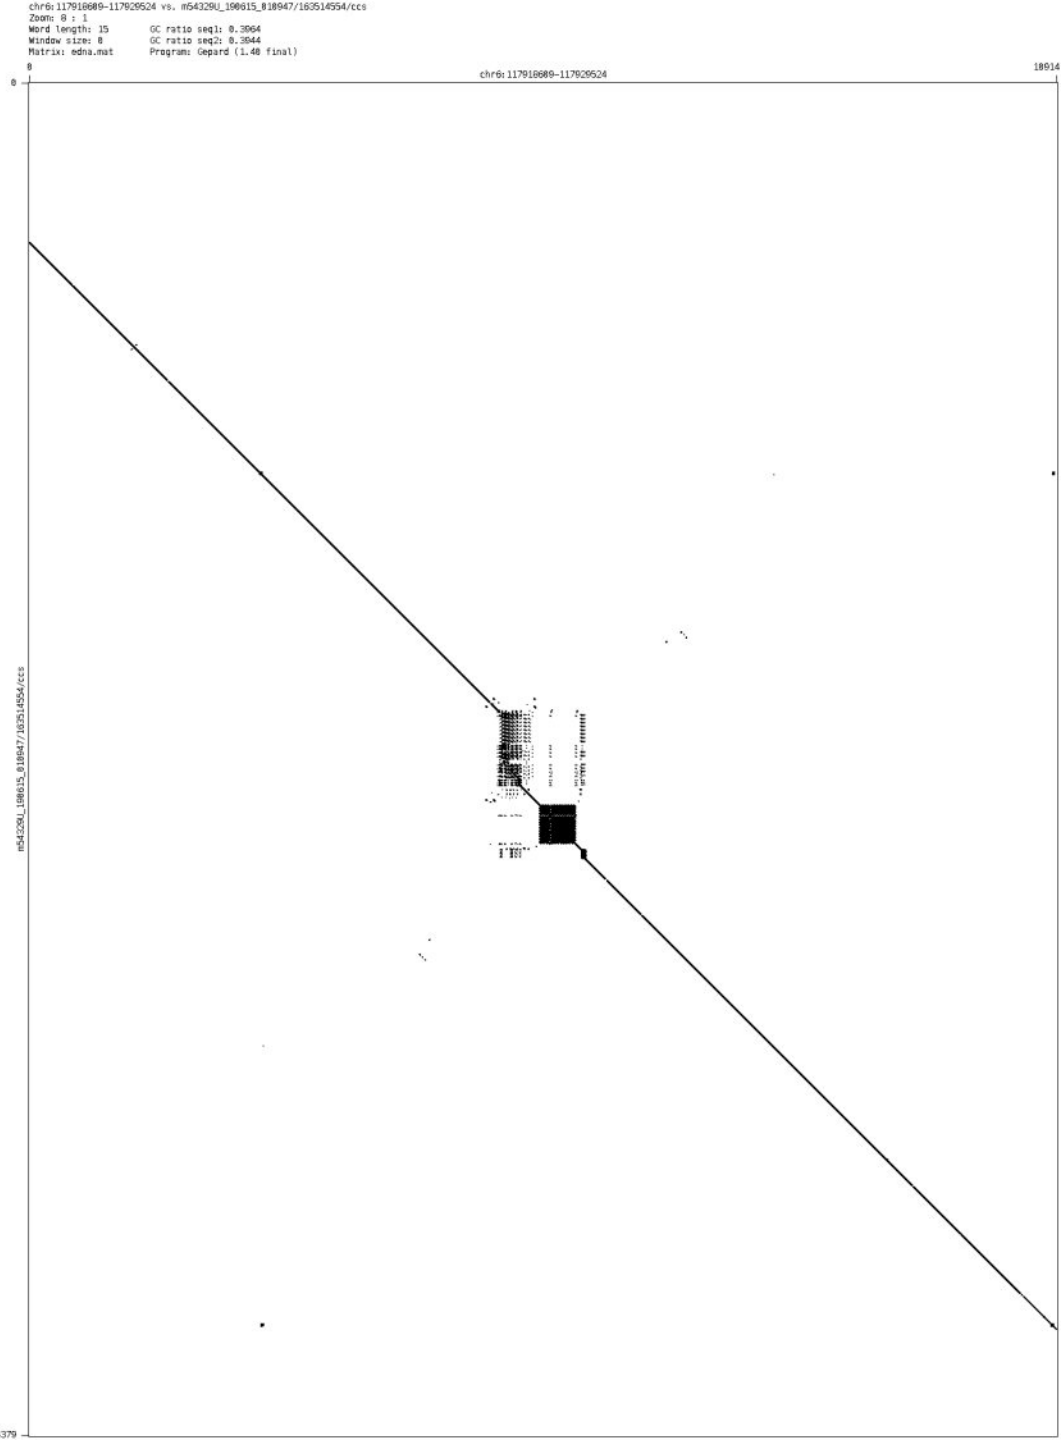

➤ chr6\_118070944\_118071373

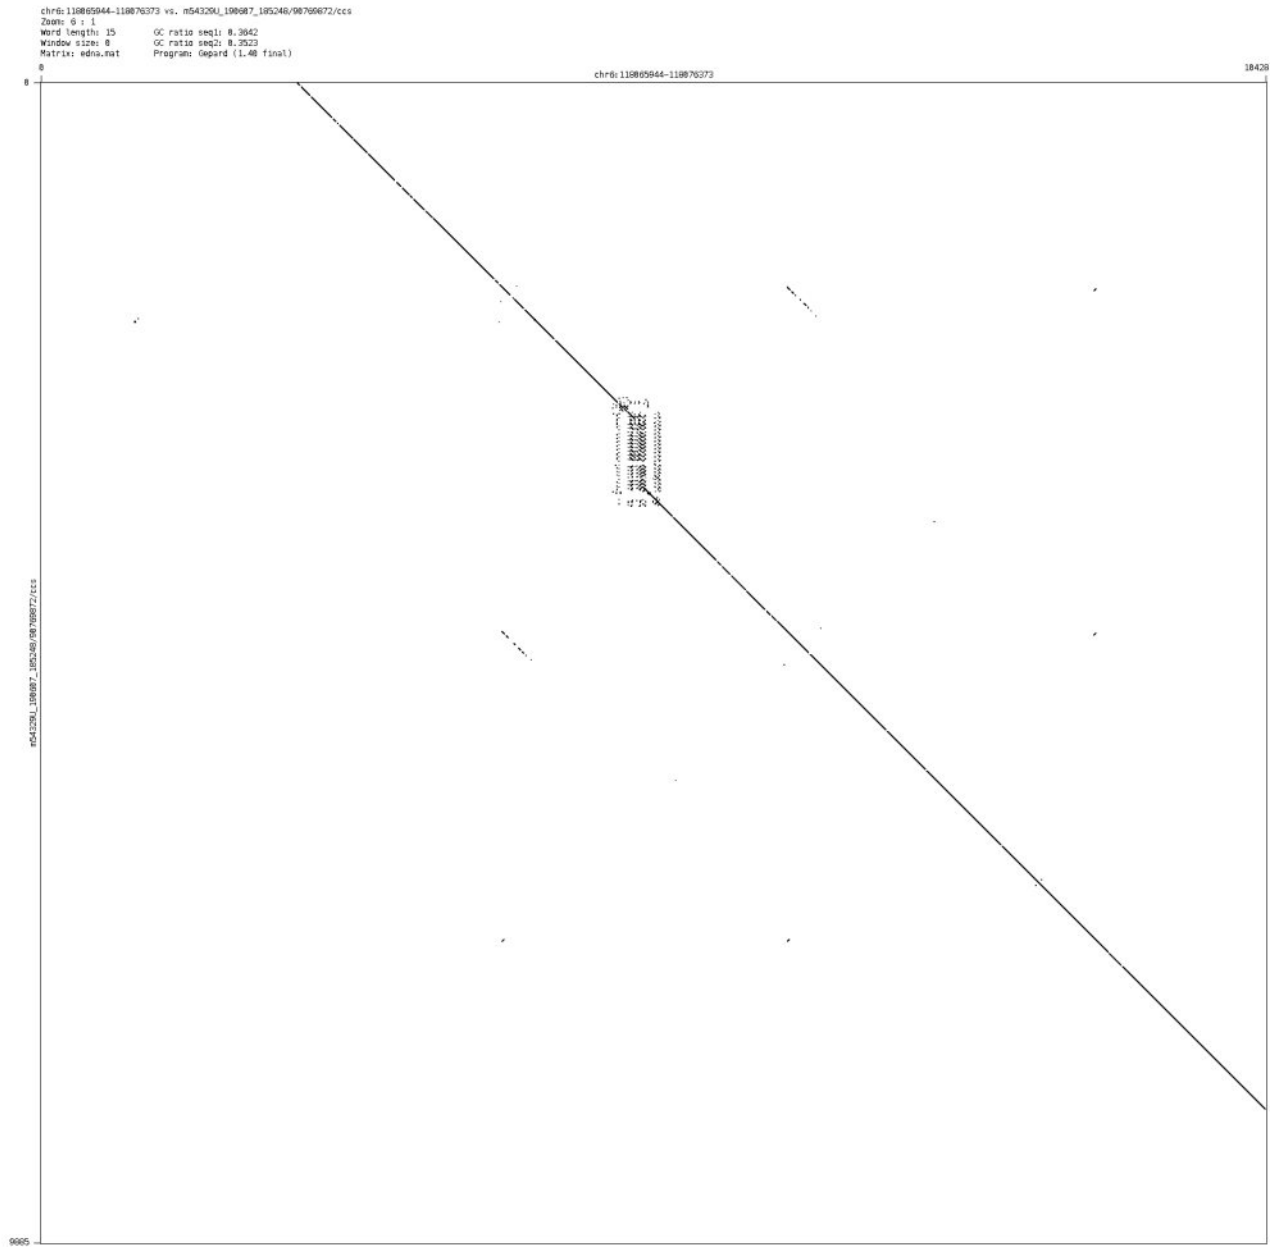

➤ chr6\_118690556\_118692766

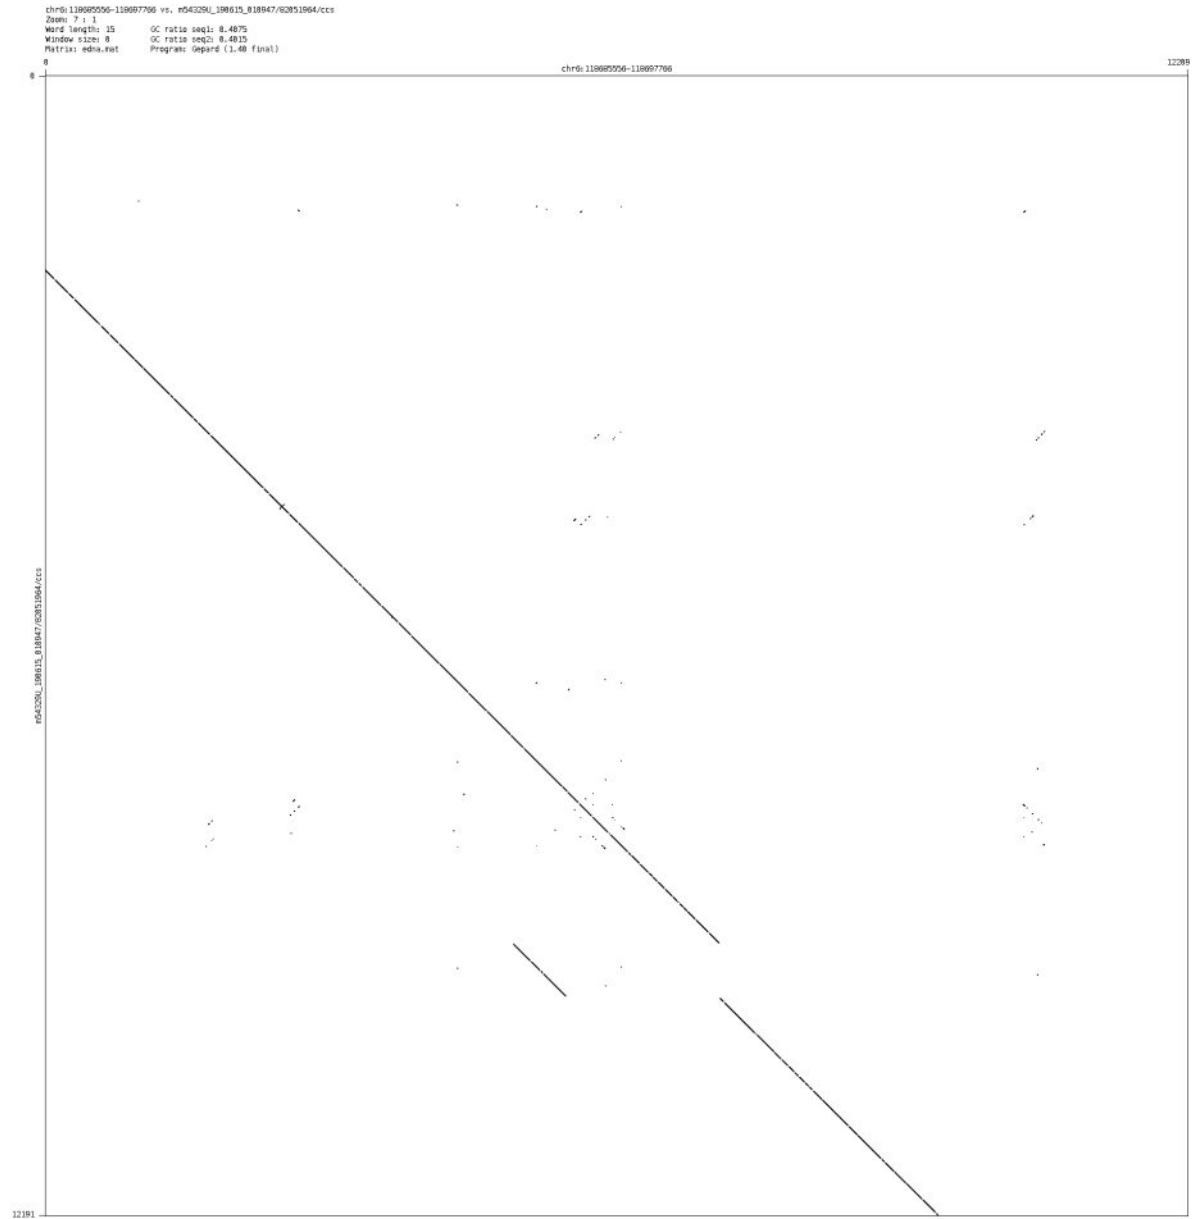



➤ chr6\_132600960\_132601126

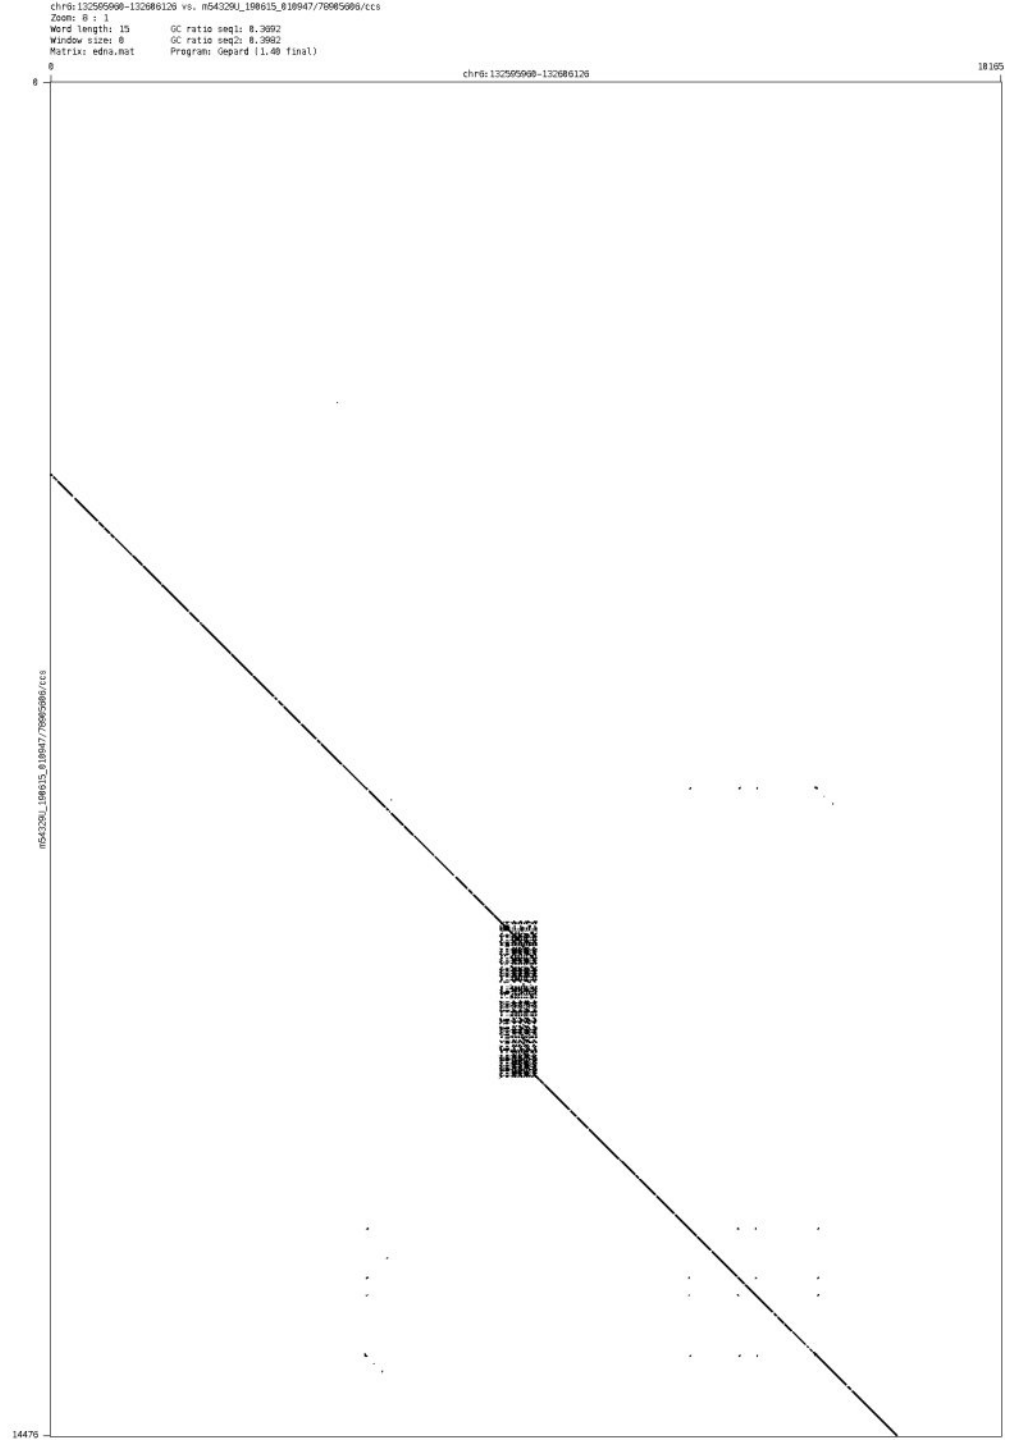

➤ chr6\_150946253\_150948473

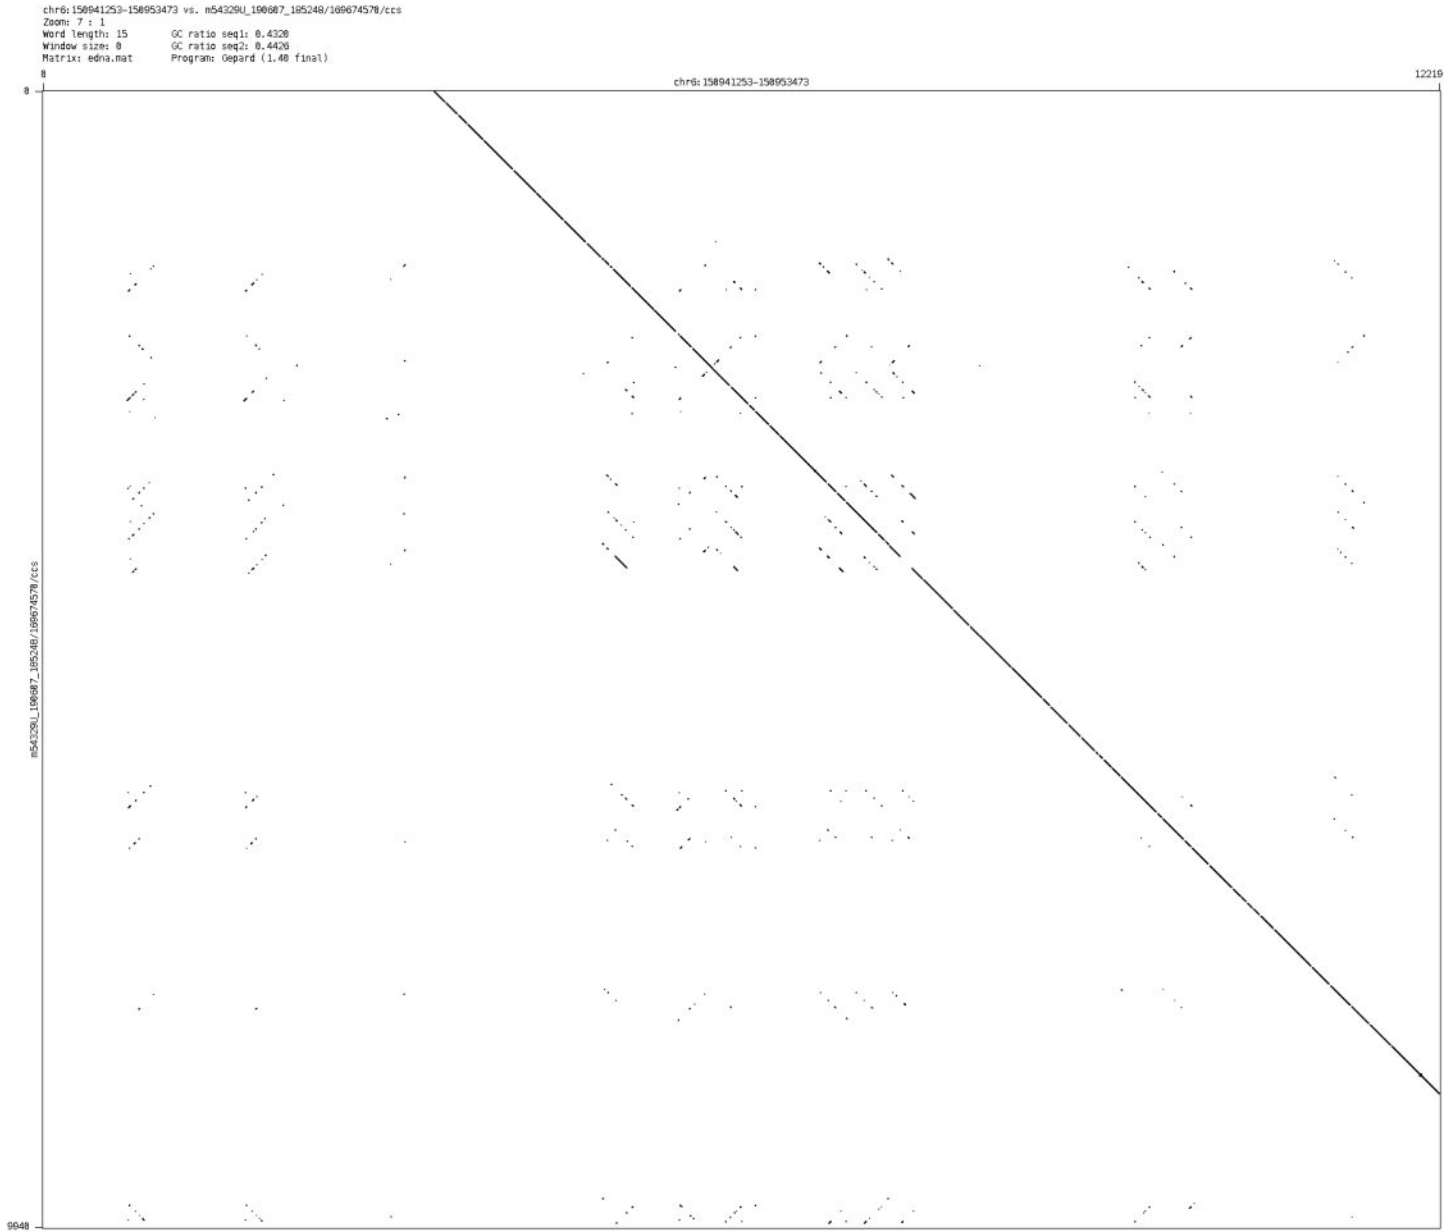

➤ chr6\_154525160\_154525403

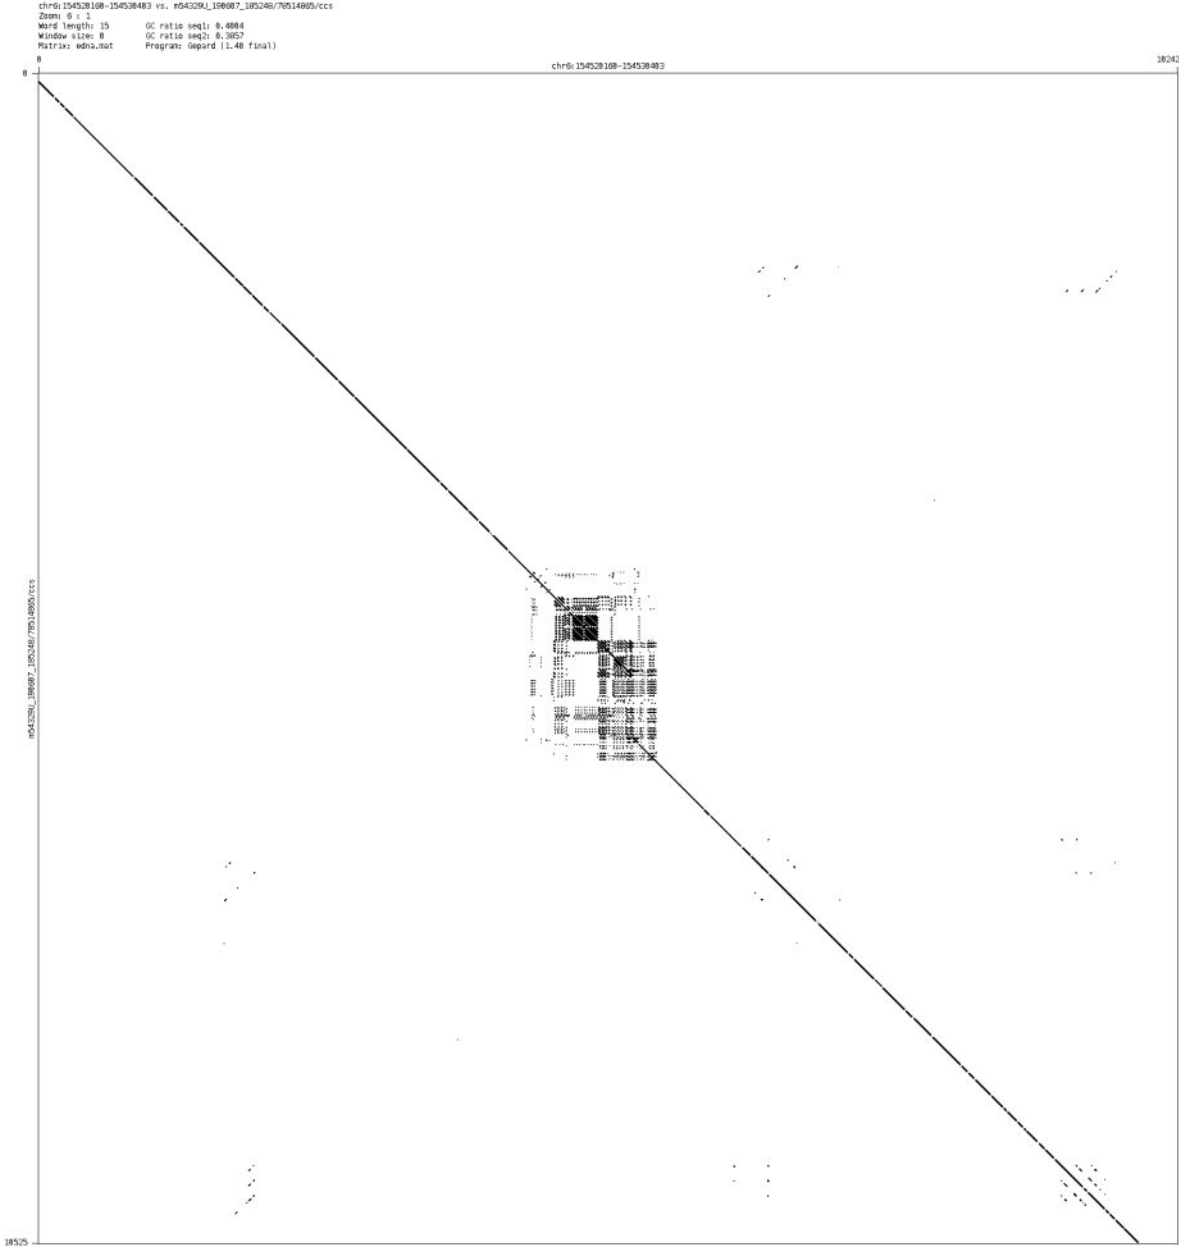

➤ chr6\_157238333\_157238398

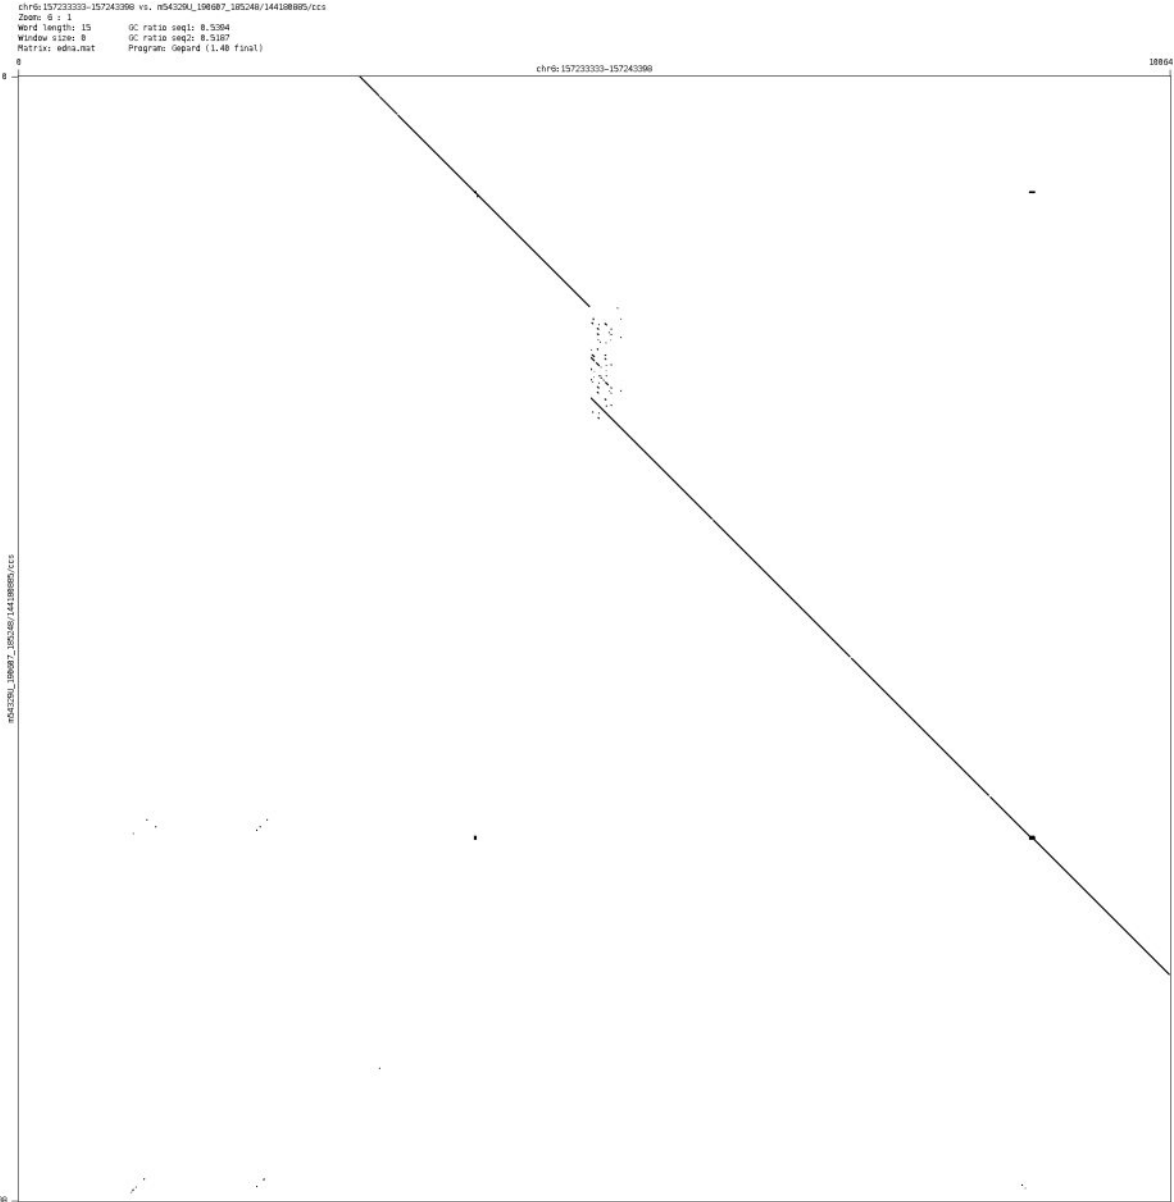

➤ chr6\_160218975\_160219097

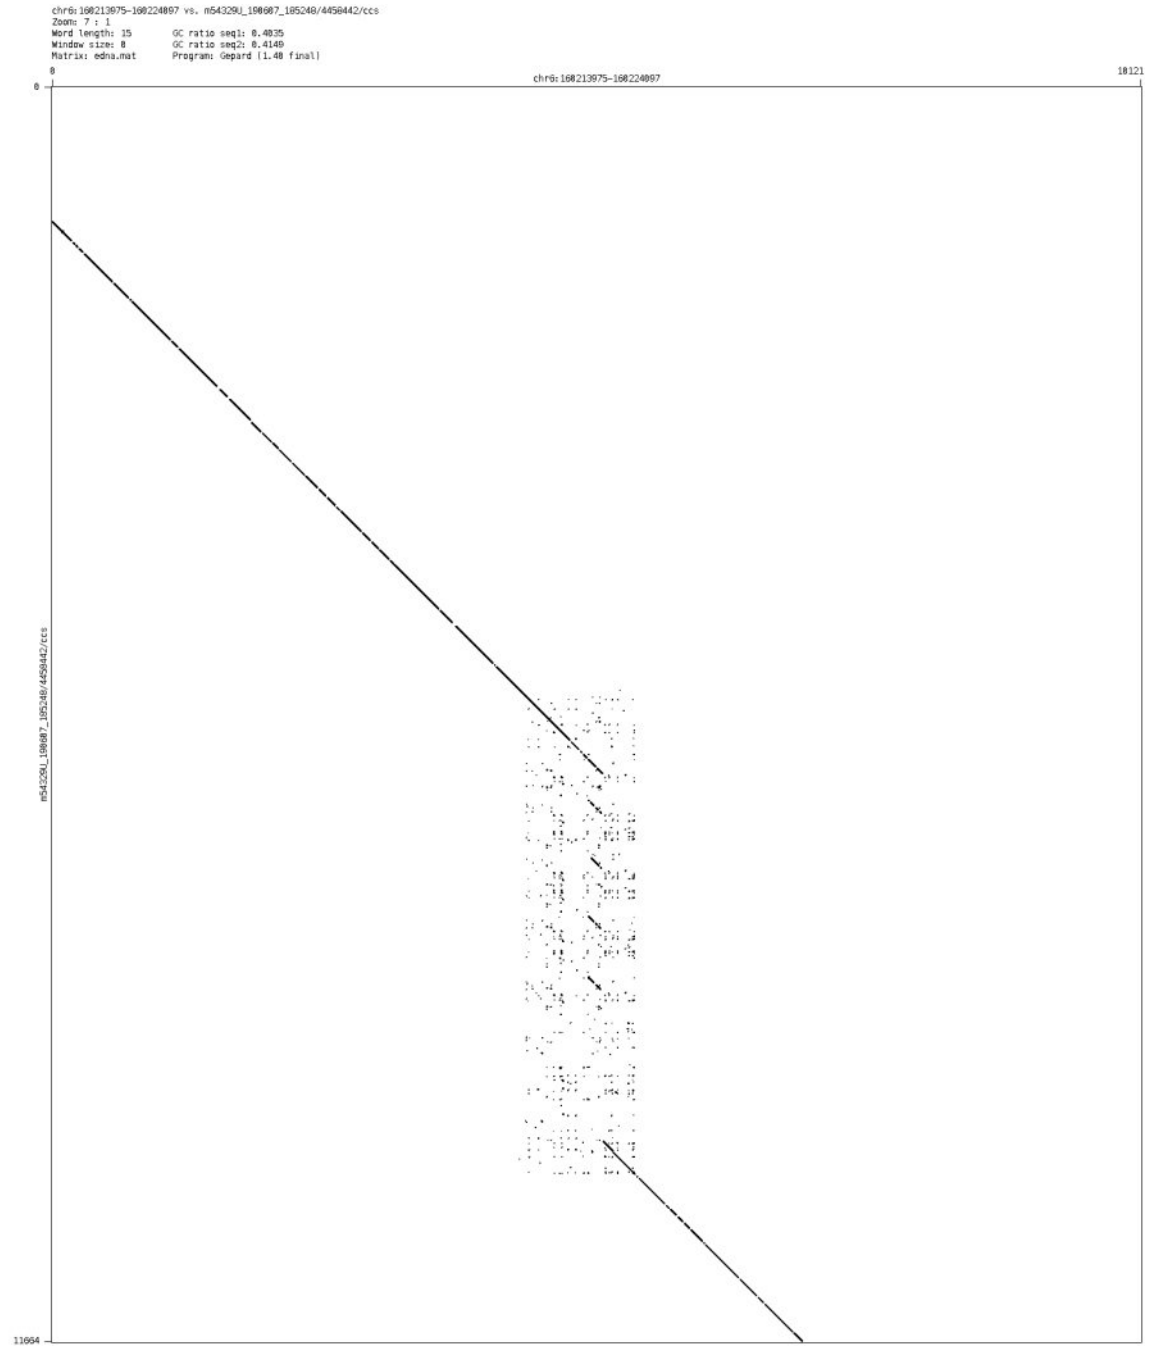

➤ chr6\_160535459\_160535555

chr6:160538459-160540555 vs. m54329U\_190807\_185248/12321430/ccs  
Zoom: 8 : 1  
Word length: 15 GC ratio seq1: 0.4373  
Window size: 8 GC ratio seq2: 0.4166  
Matrix: edna.mat Program: Oepard (1.40 final)

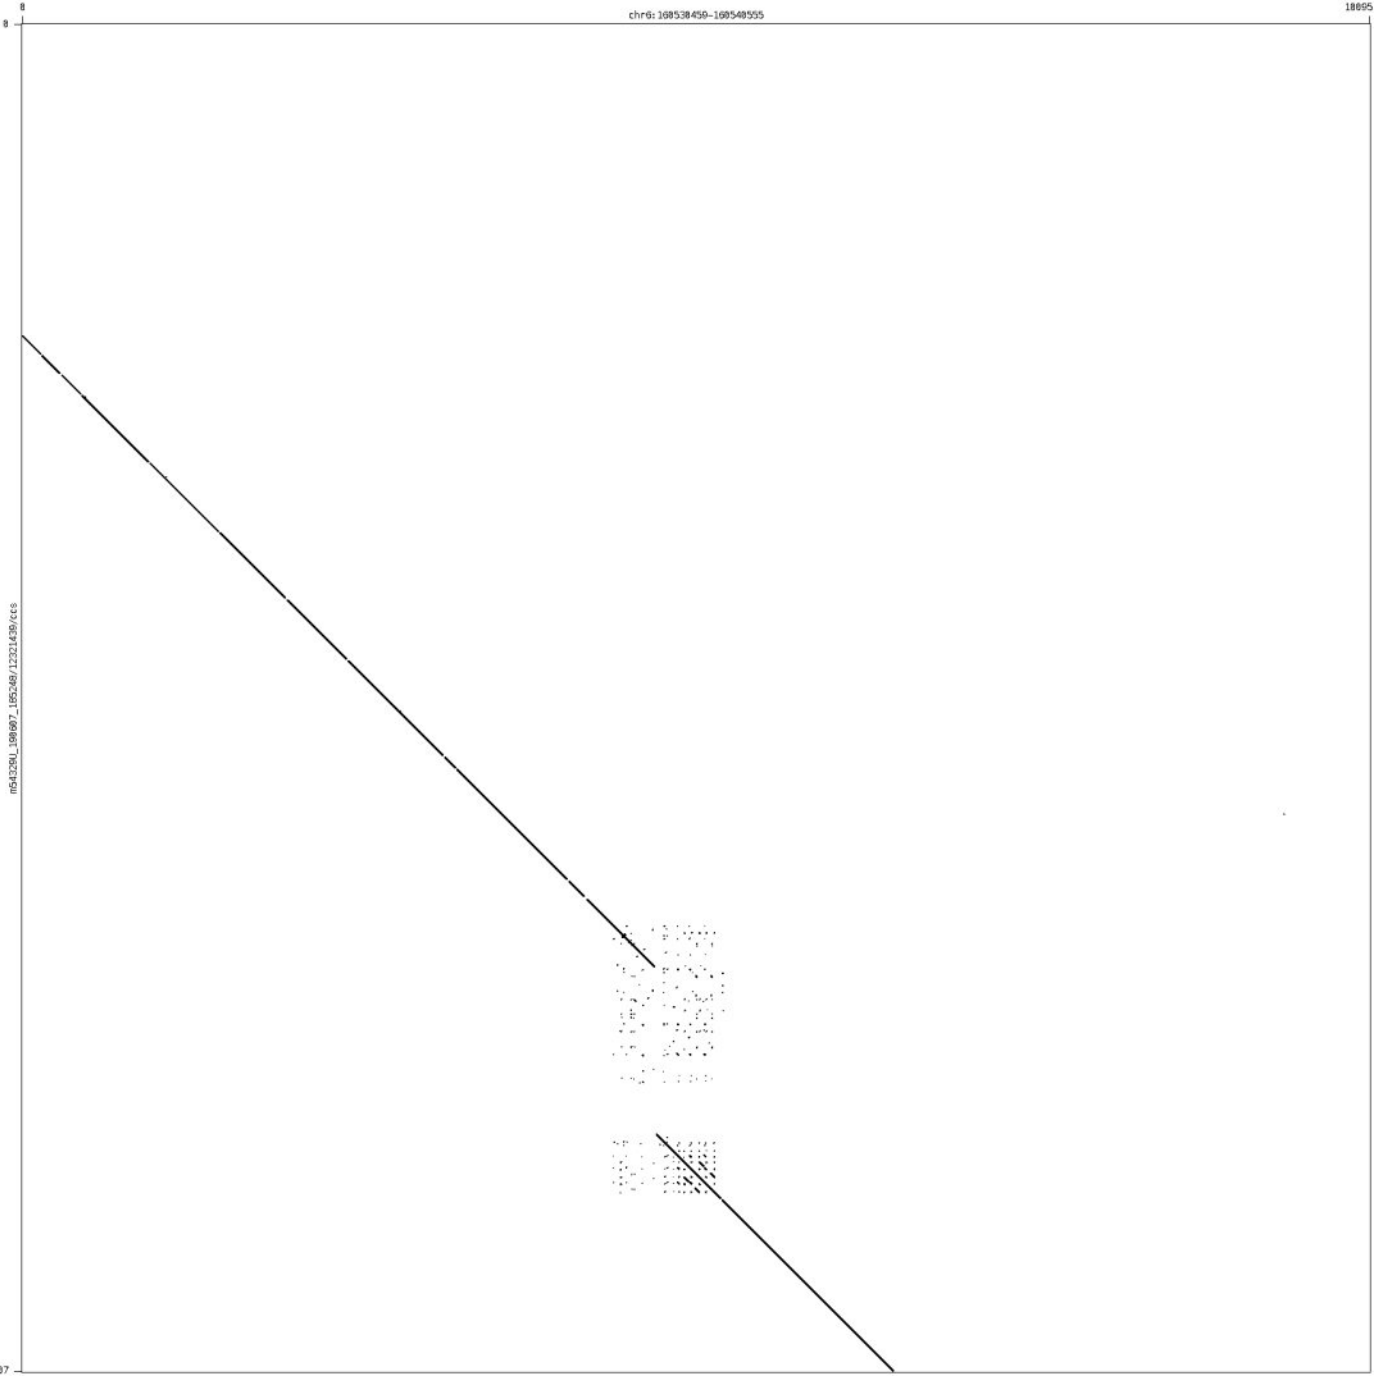

➤ chr6\_165749273\_165749500

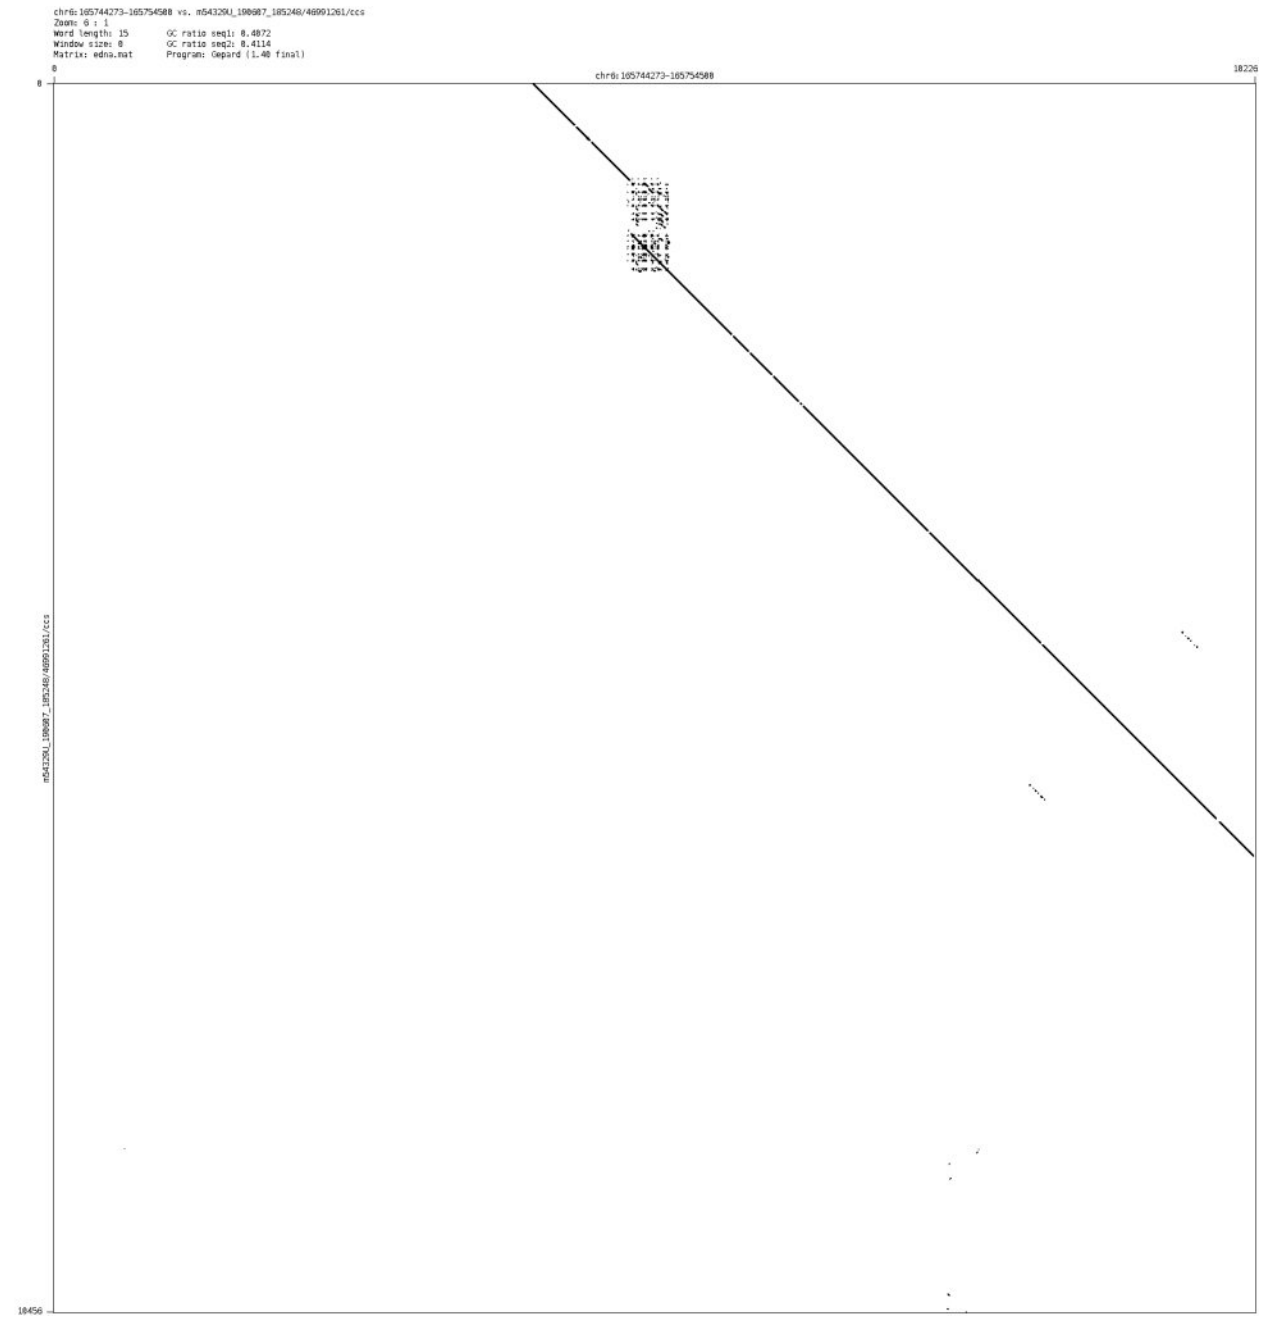

➤ chr6\_165839937\_165840008

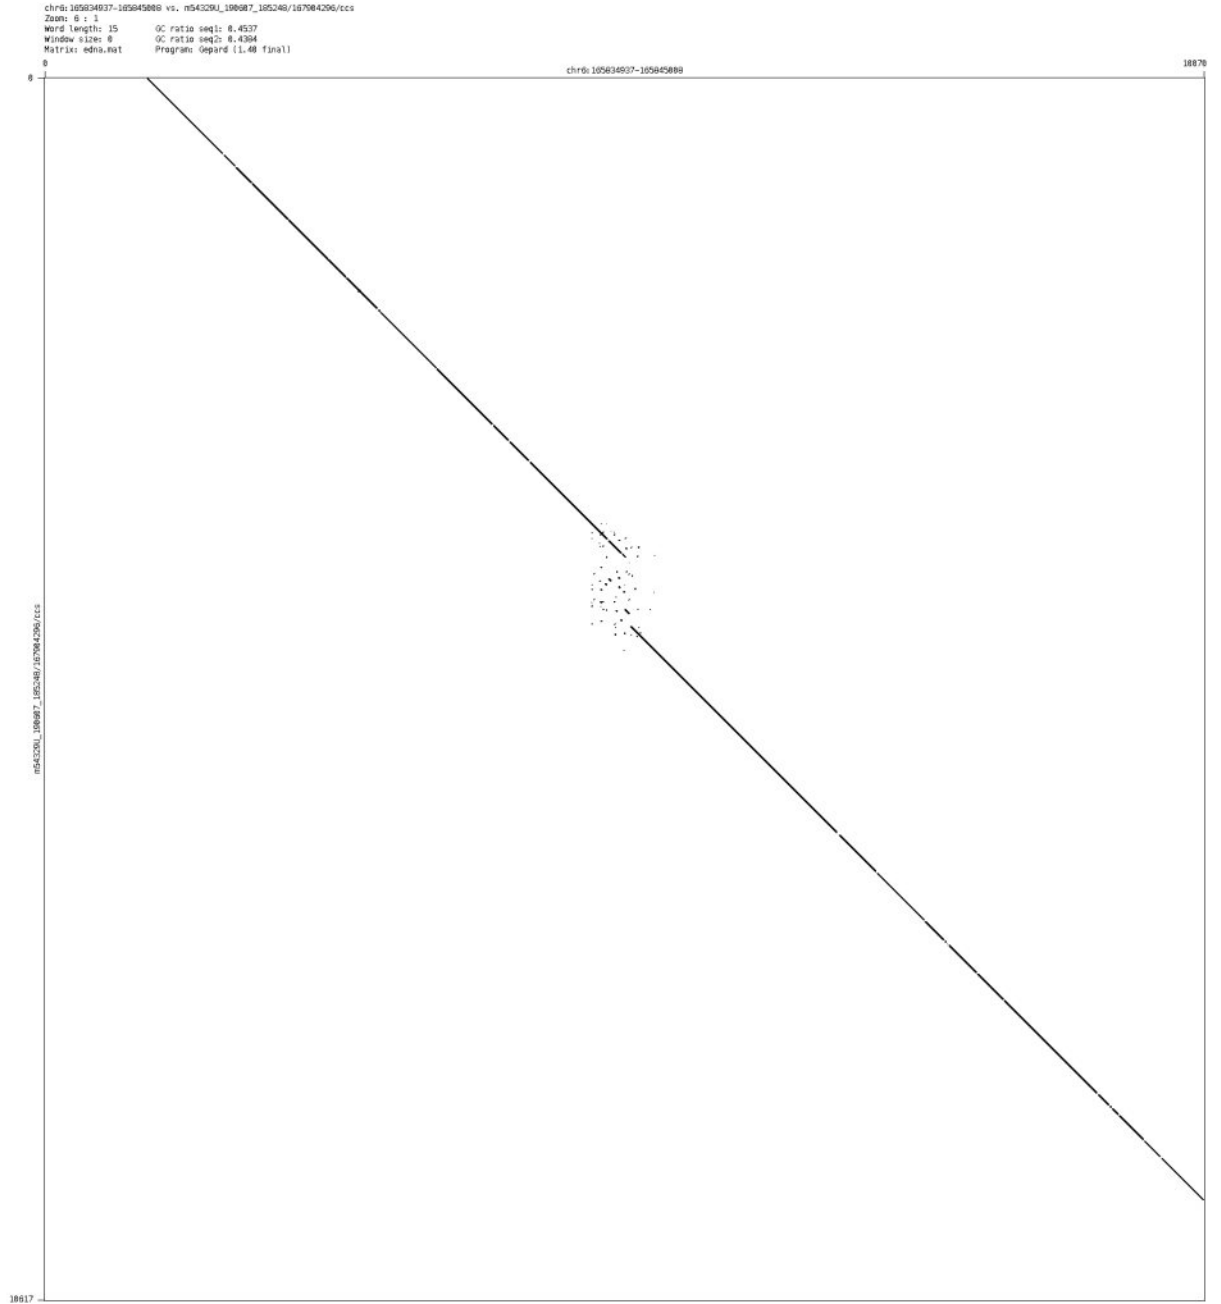



➤ chr6\_166416140\_166416256

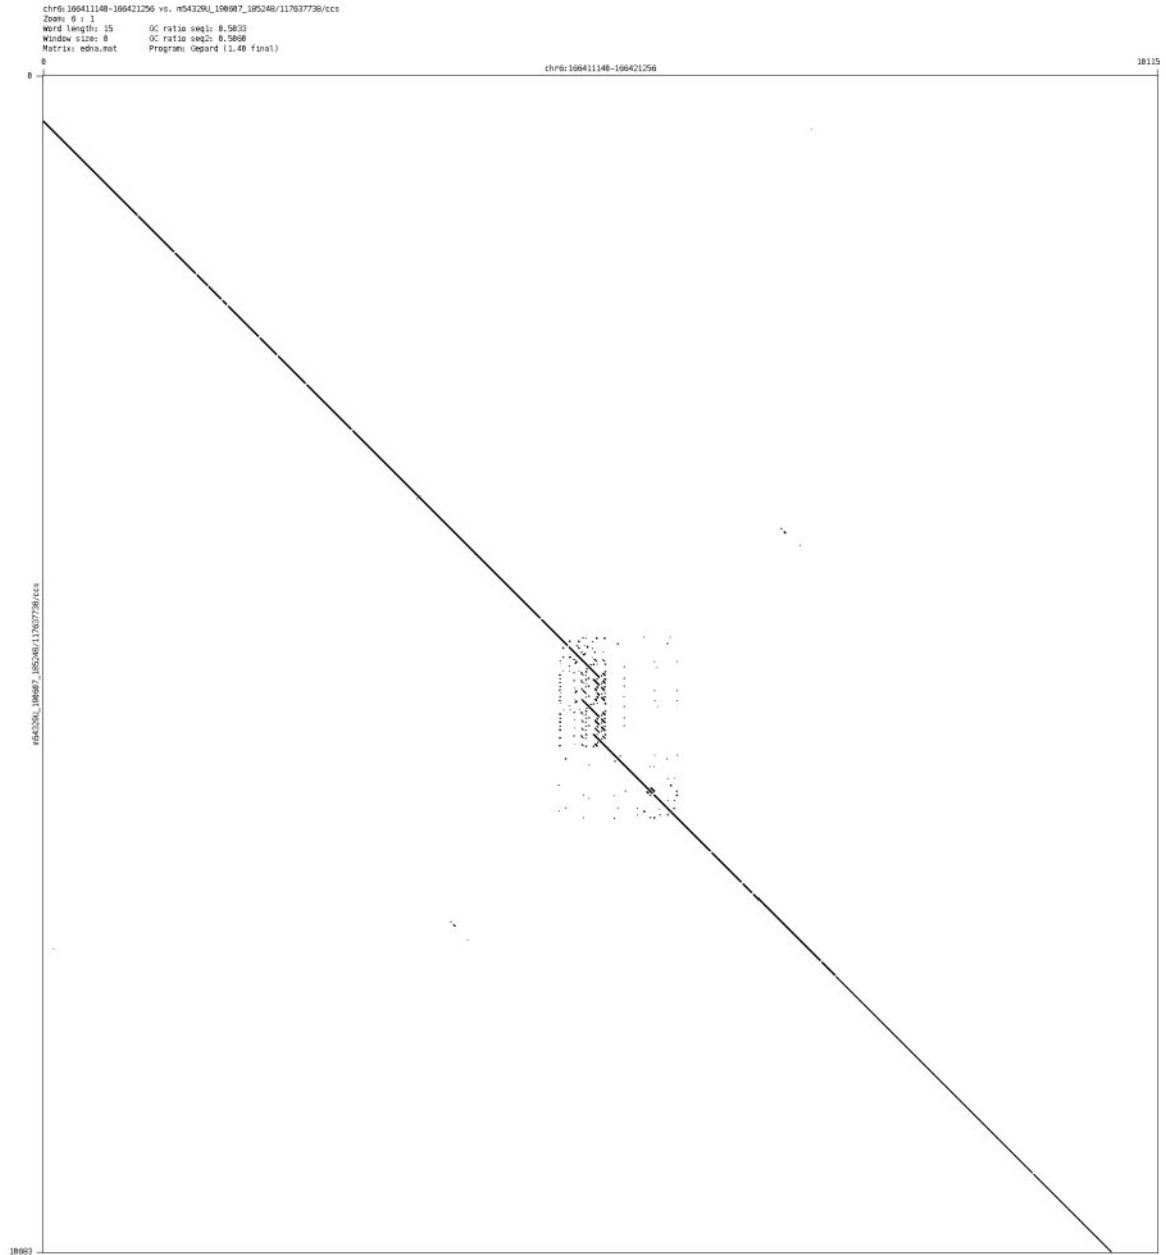

➤ chr6\_167433114\_167433256

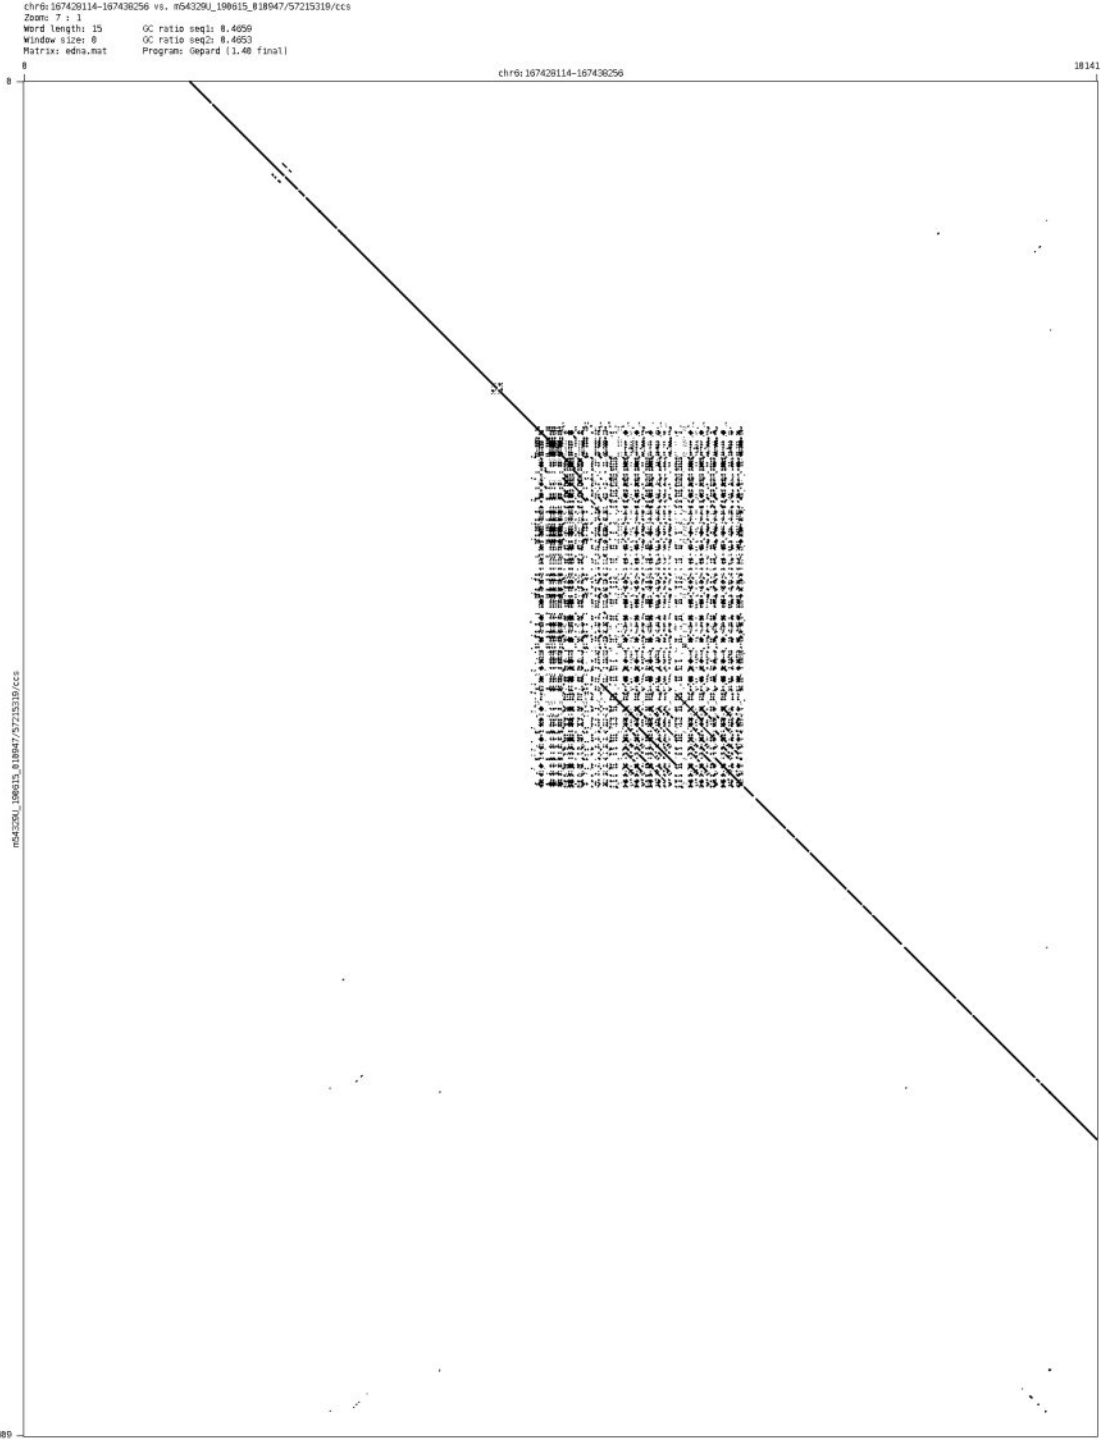

➤ chr6\_167651465\_167651832

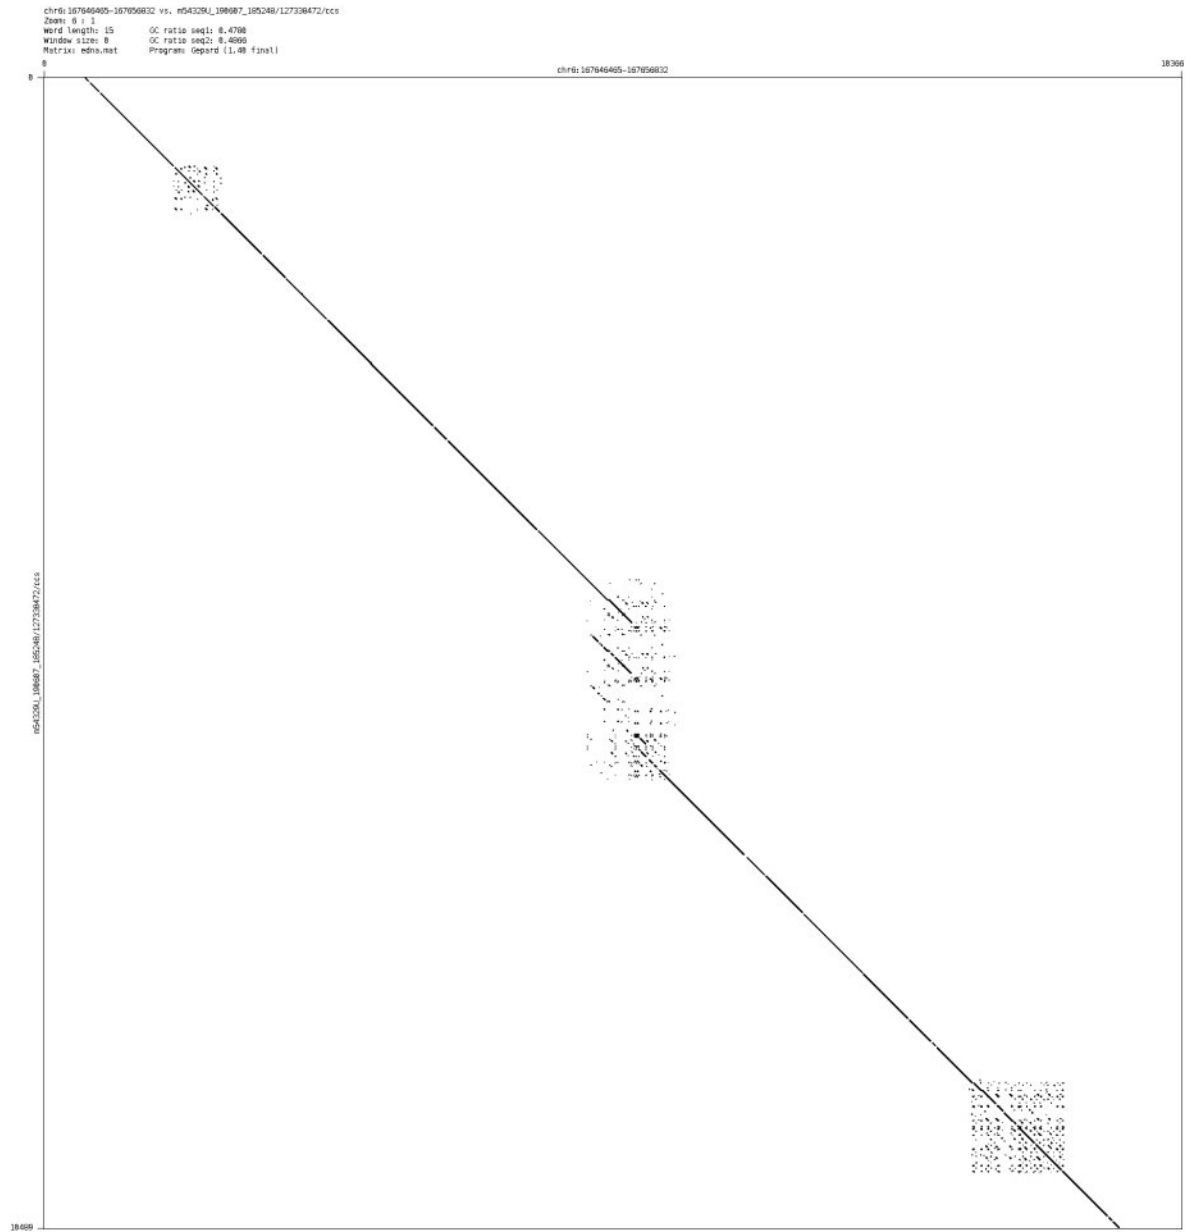

➤ chr6\_167735329\_167735534

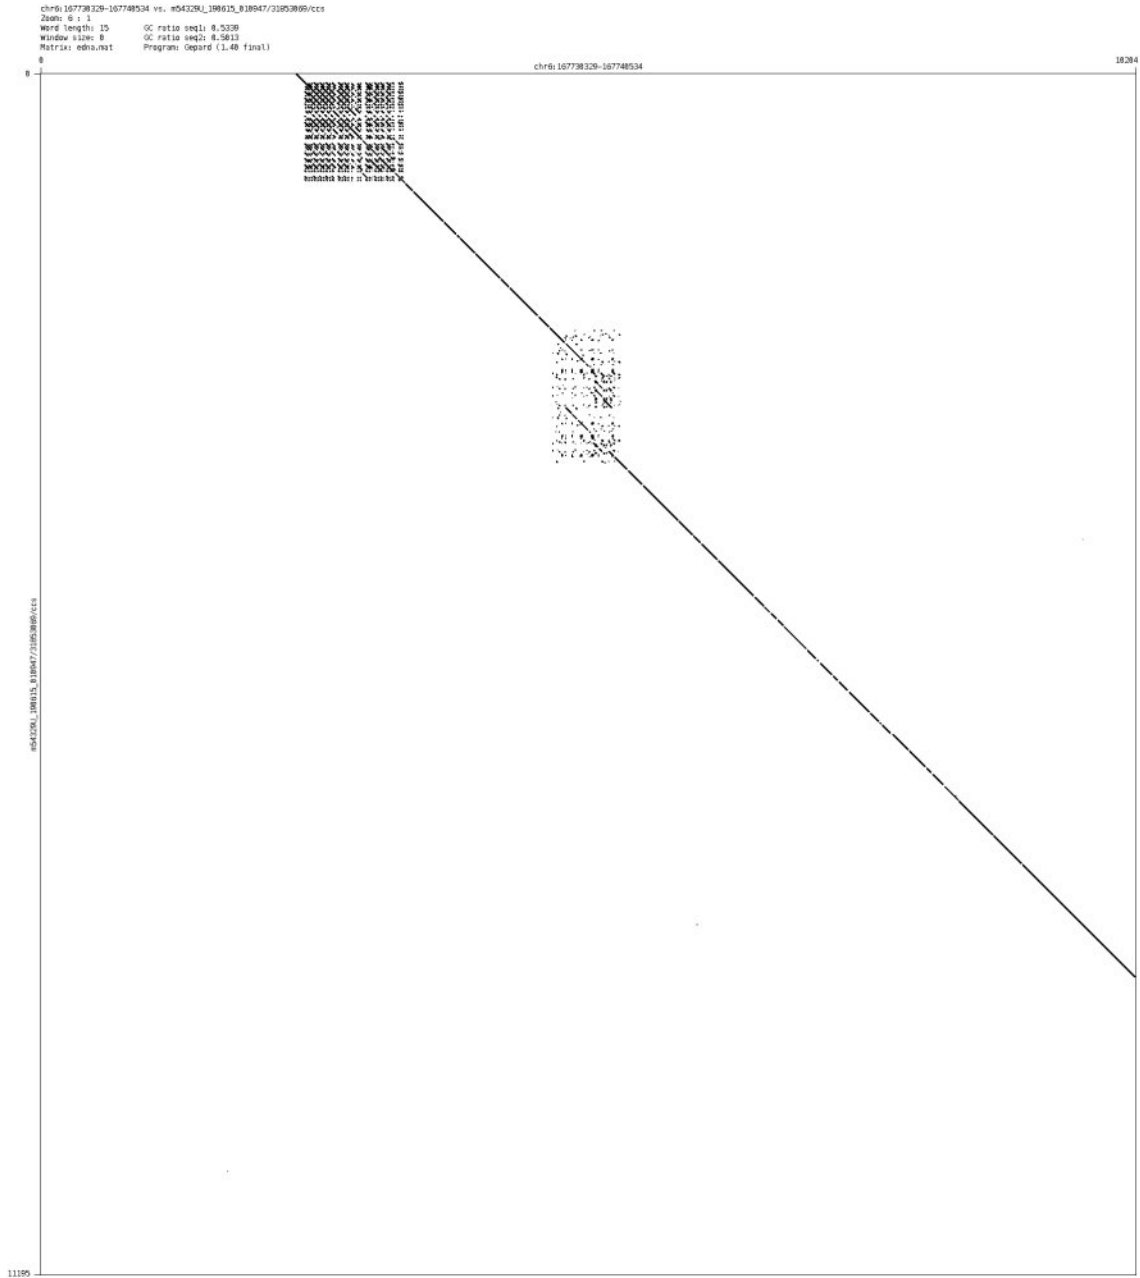

➤ chr6\_167990058\_167990217

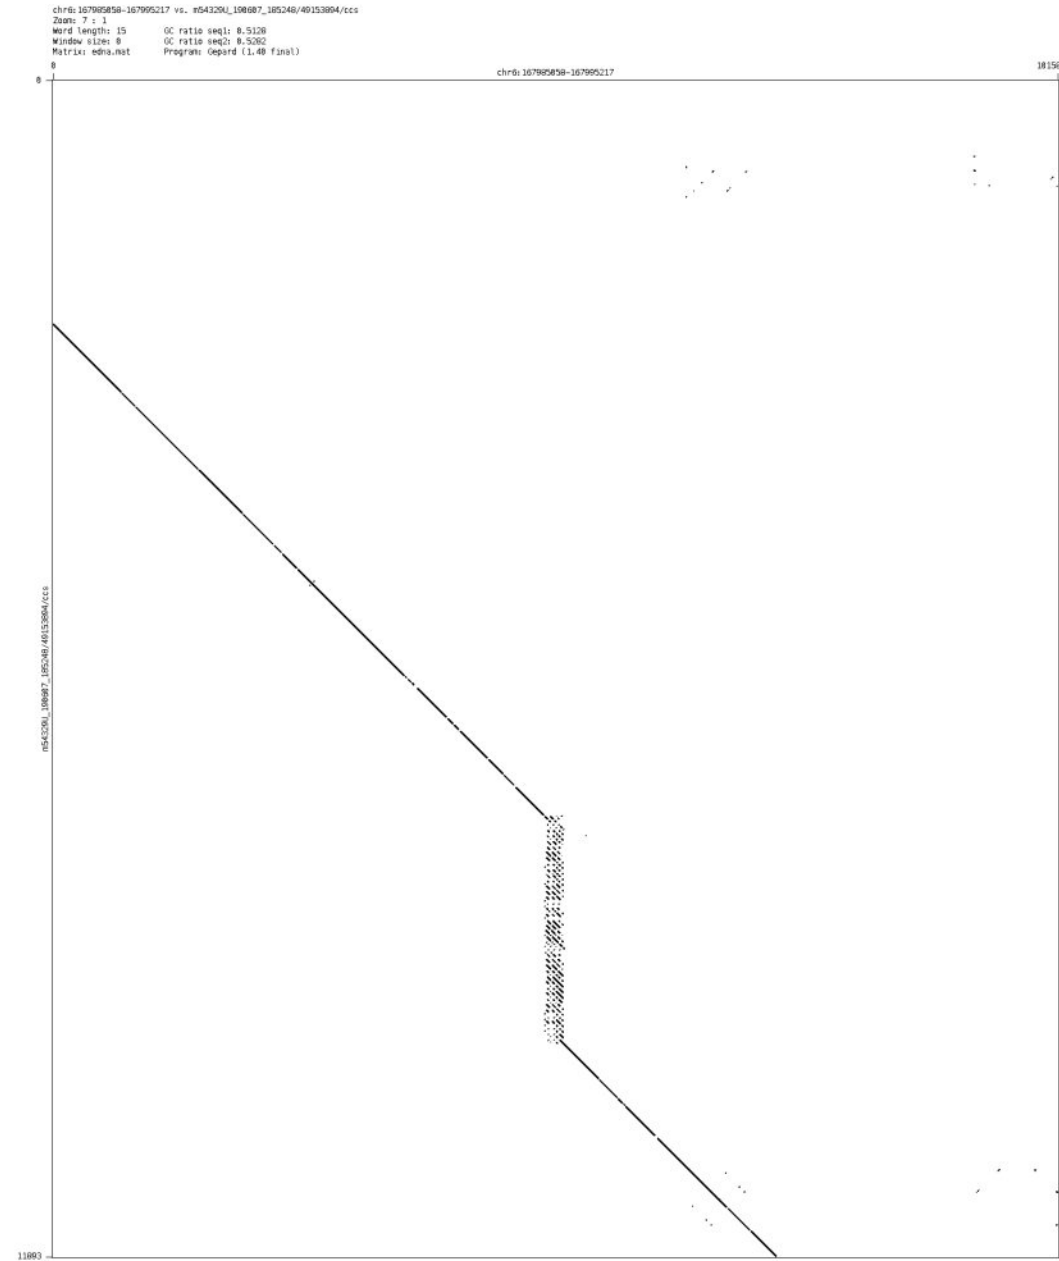

➤ chr6\_168659501\_168660054

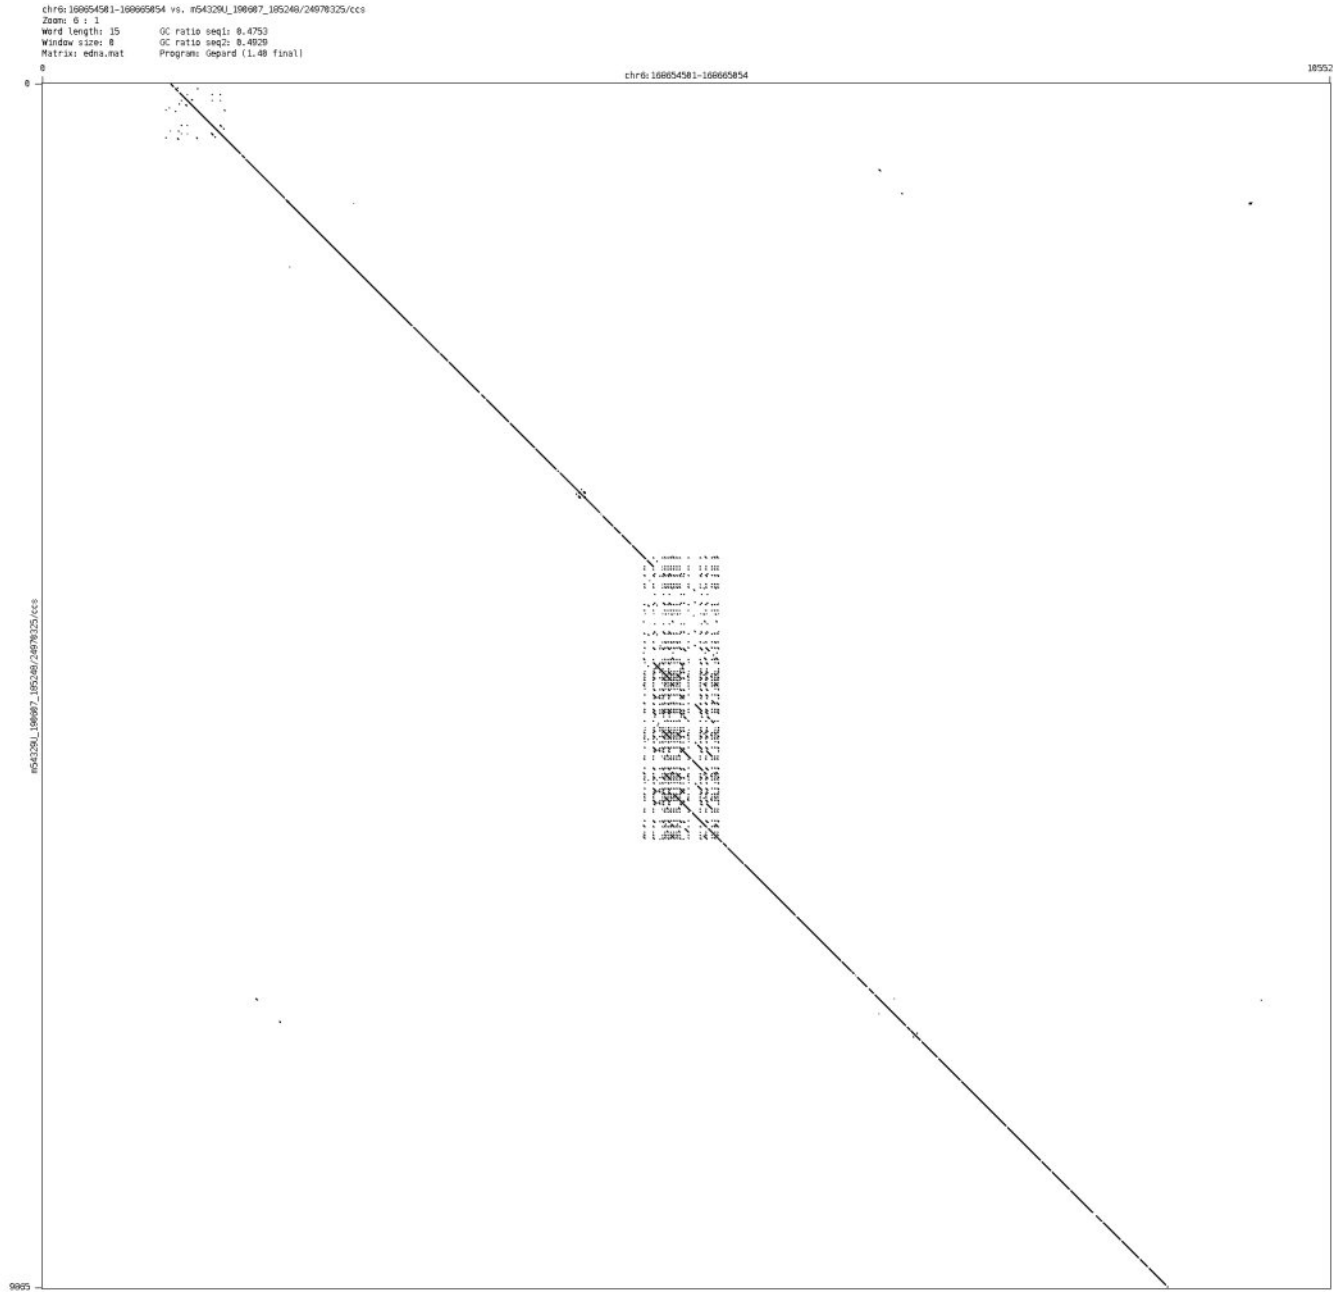

➤ chr6\_168839698\_168841851

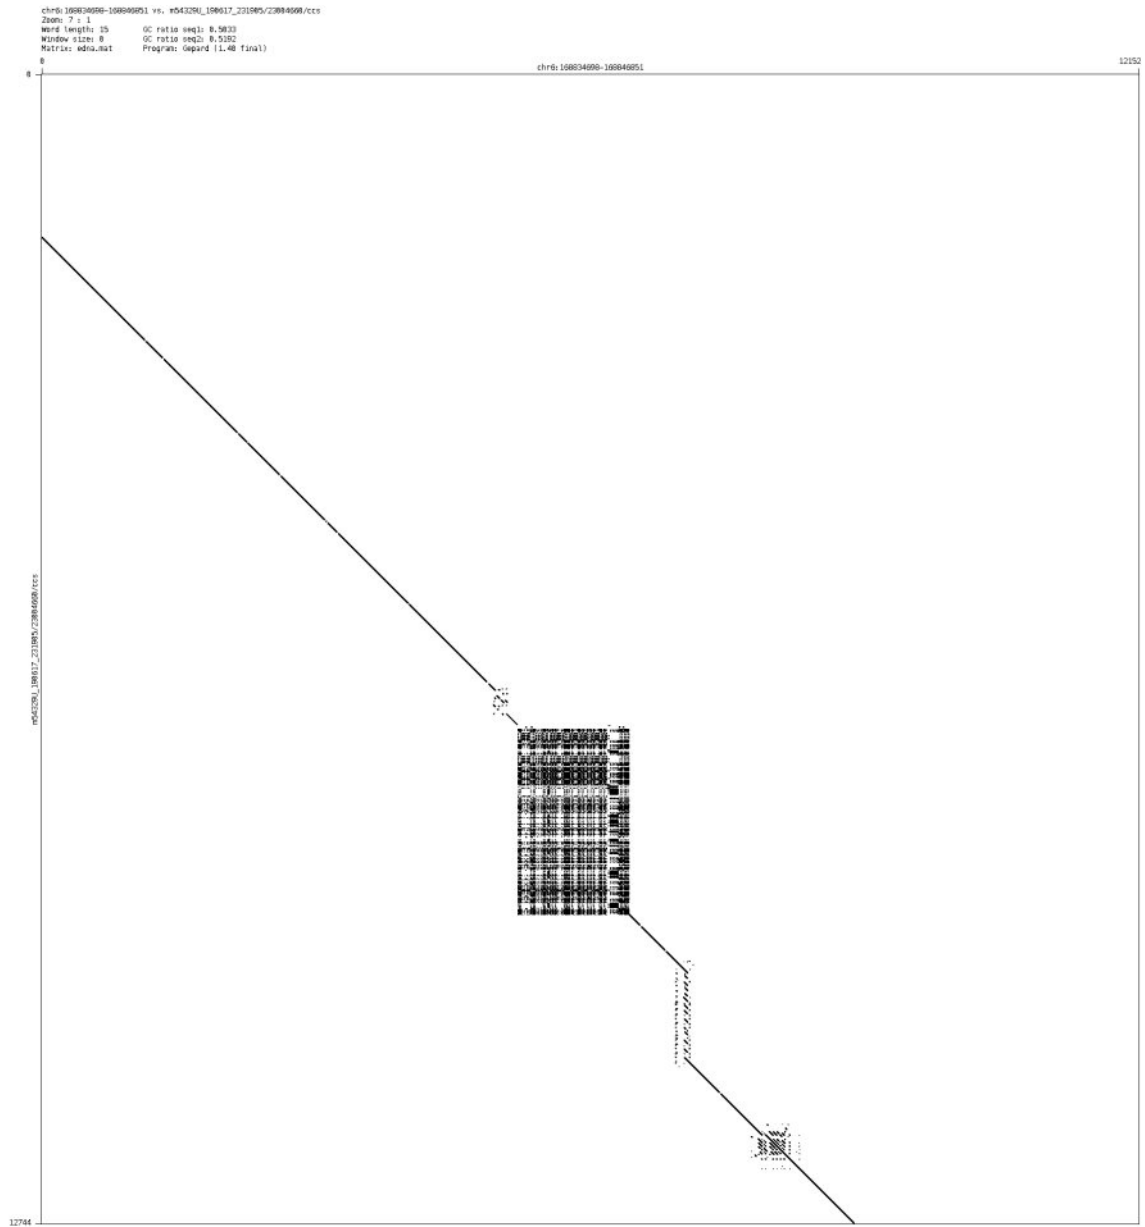

➤ chr6\_168931371\_168932485

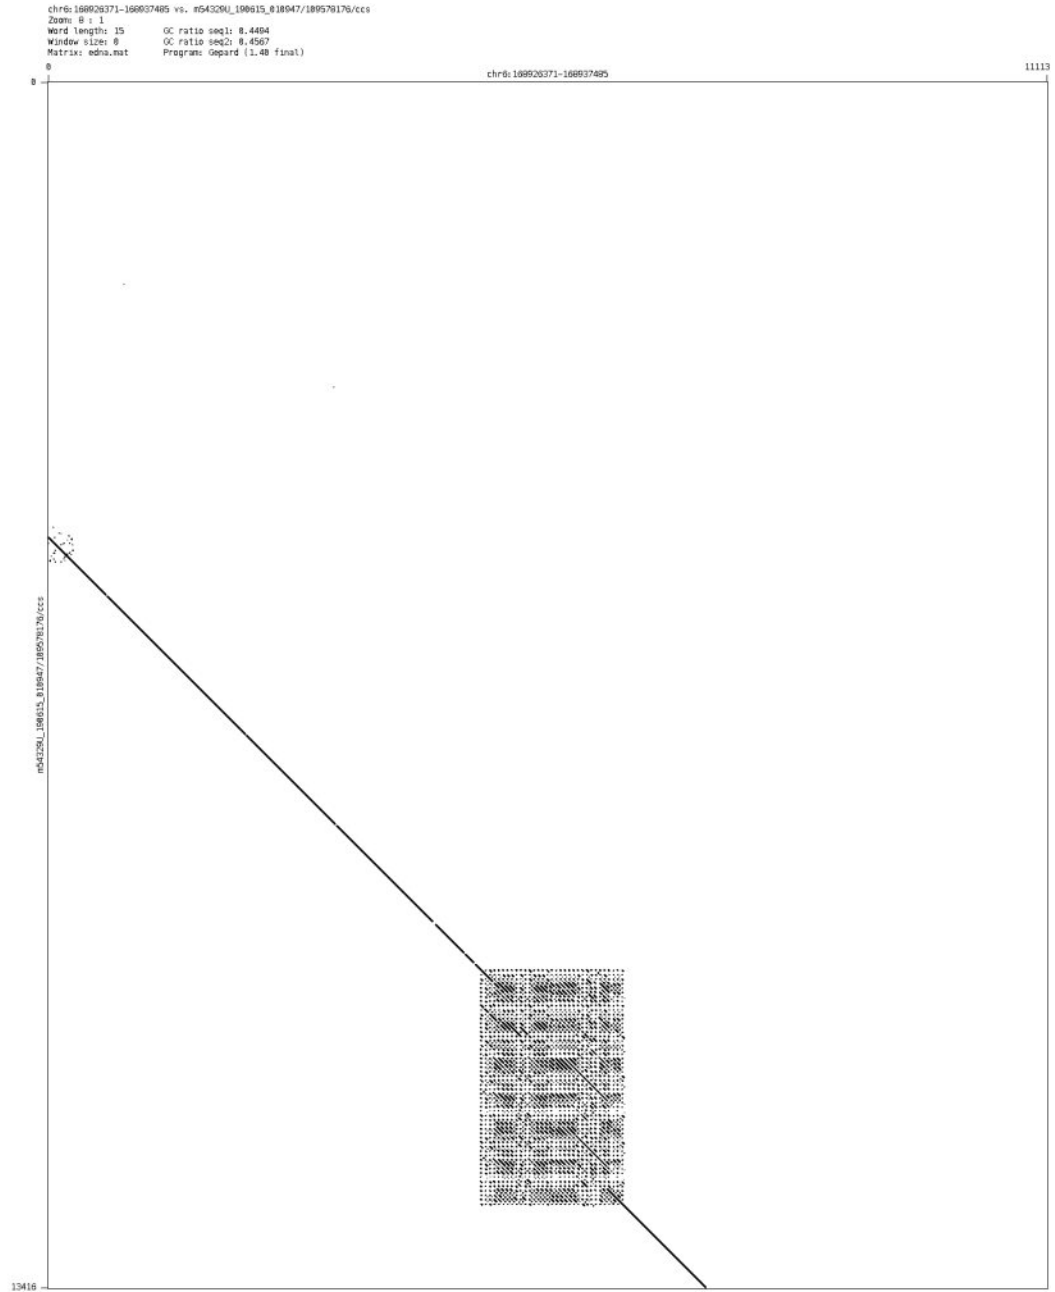



➤ chr6\_169242827\_169243076

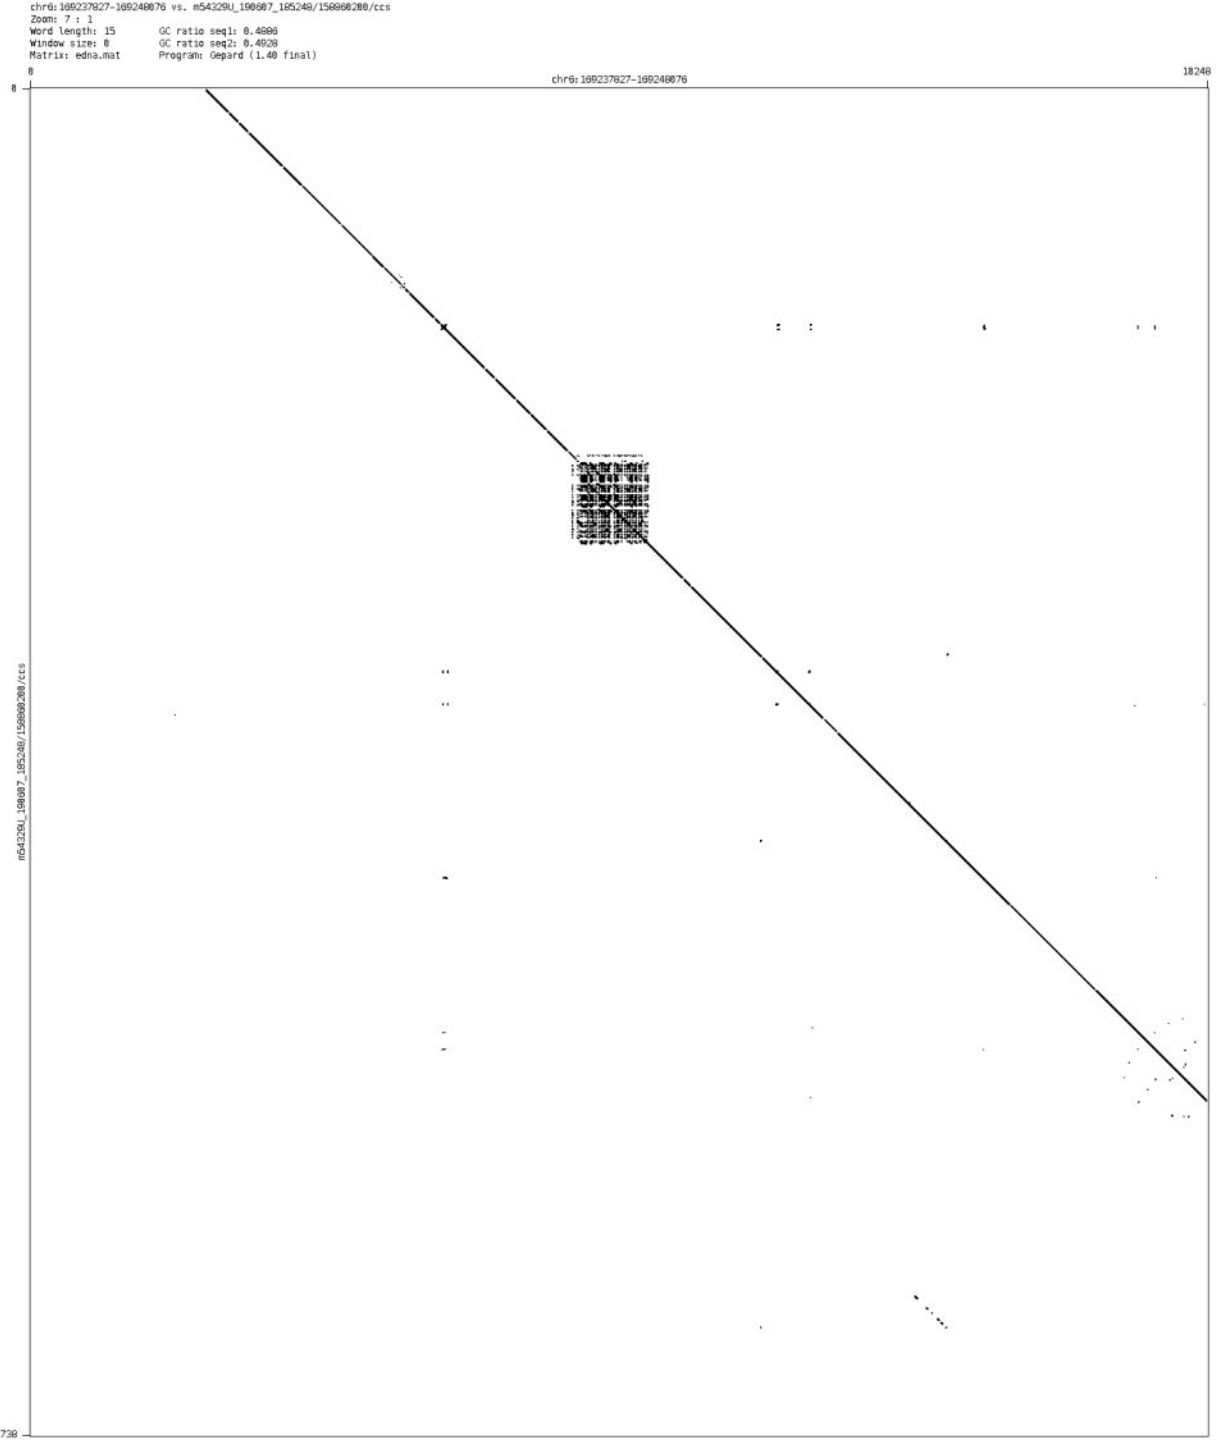

➤ chr6\_170113638\_170114174

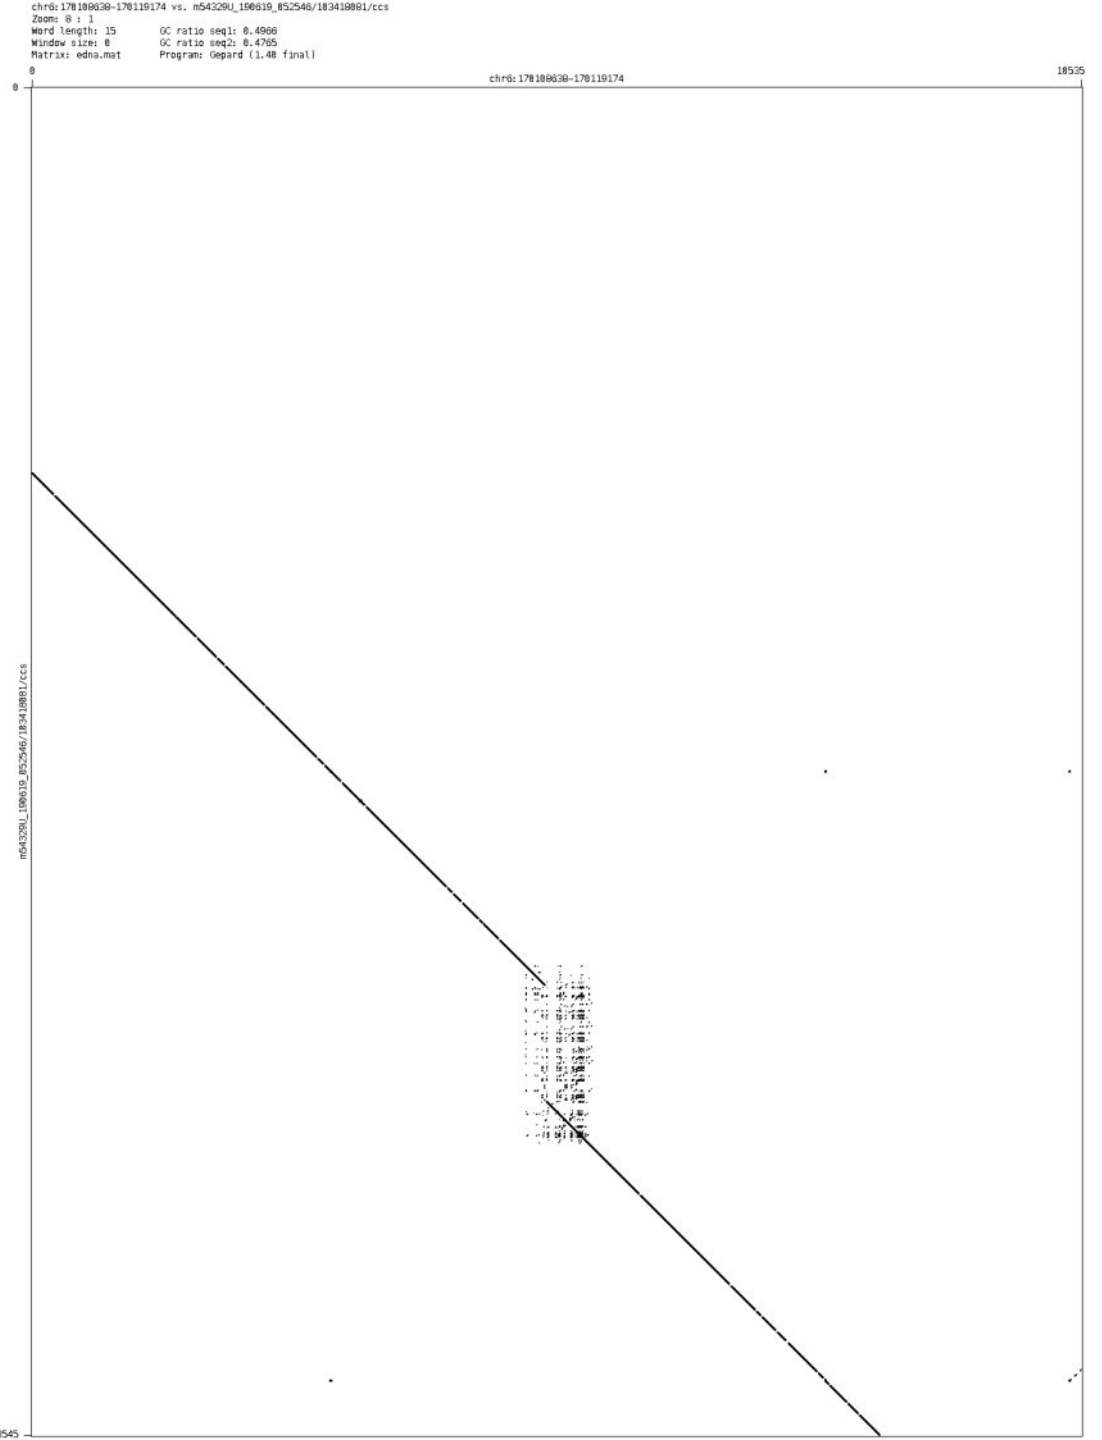

➤ chr6\_170398827\_170400228

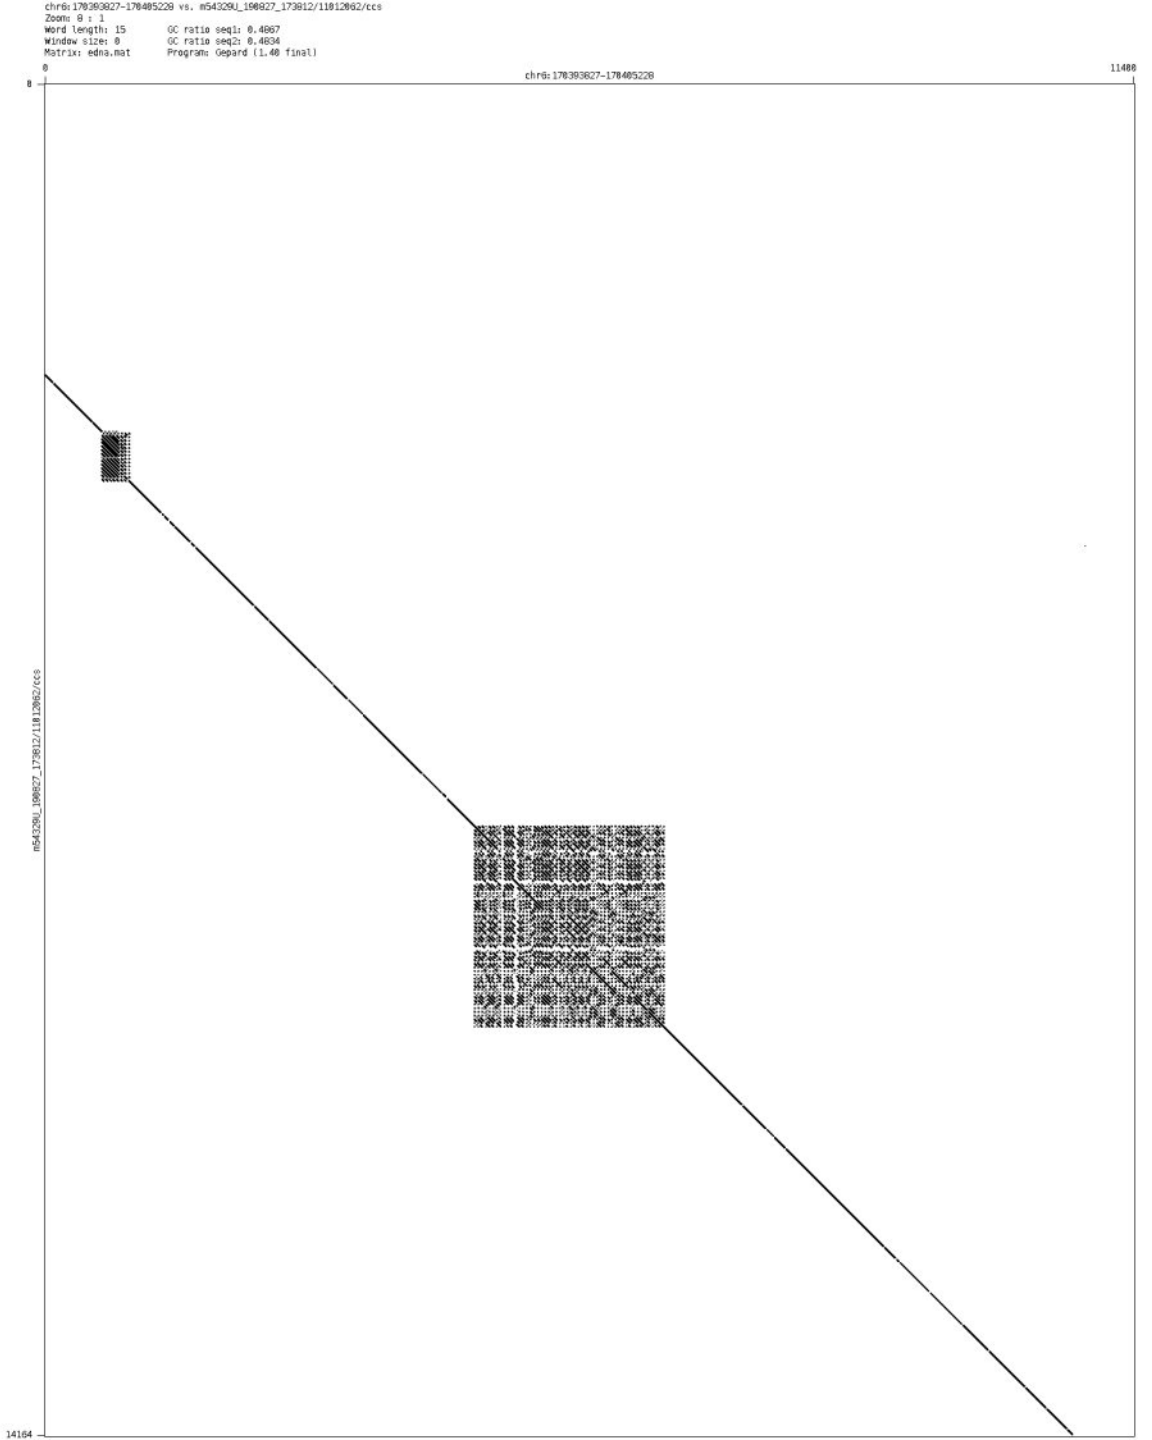

➤ chr7\_205261\_206826

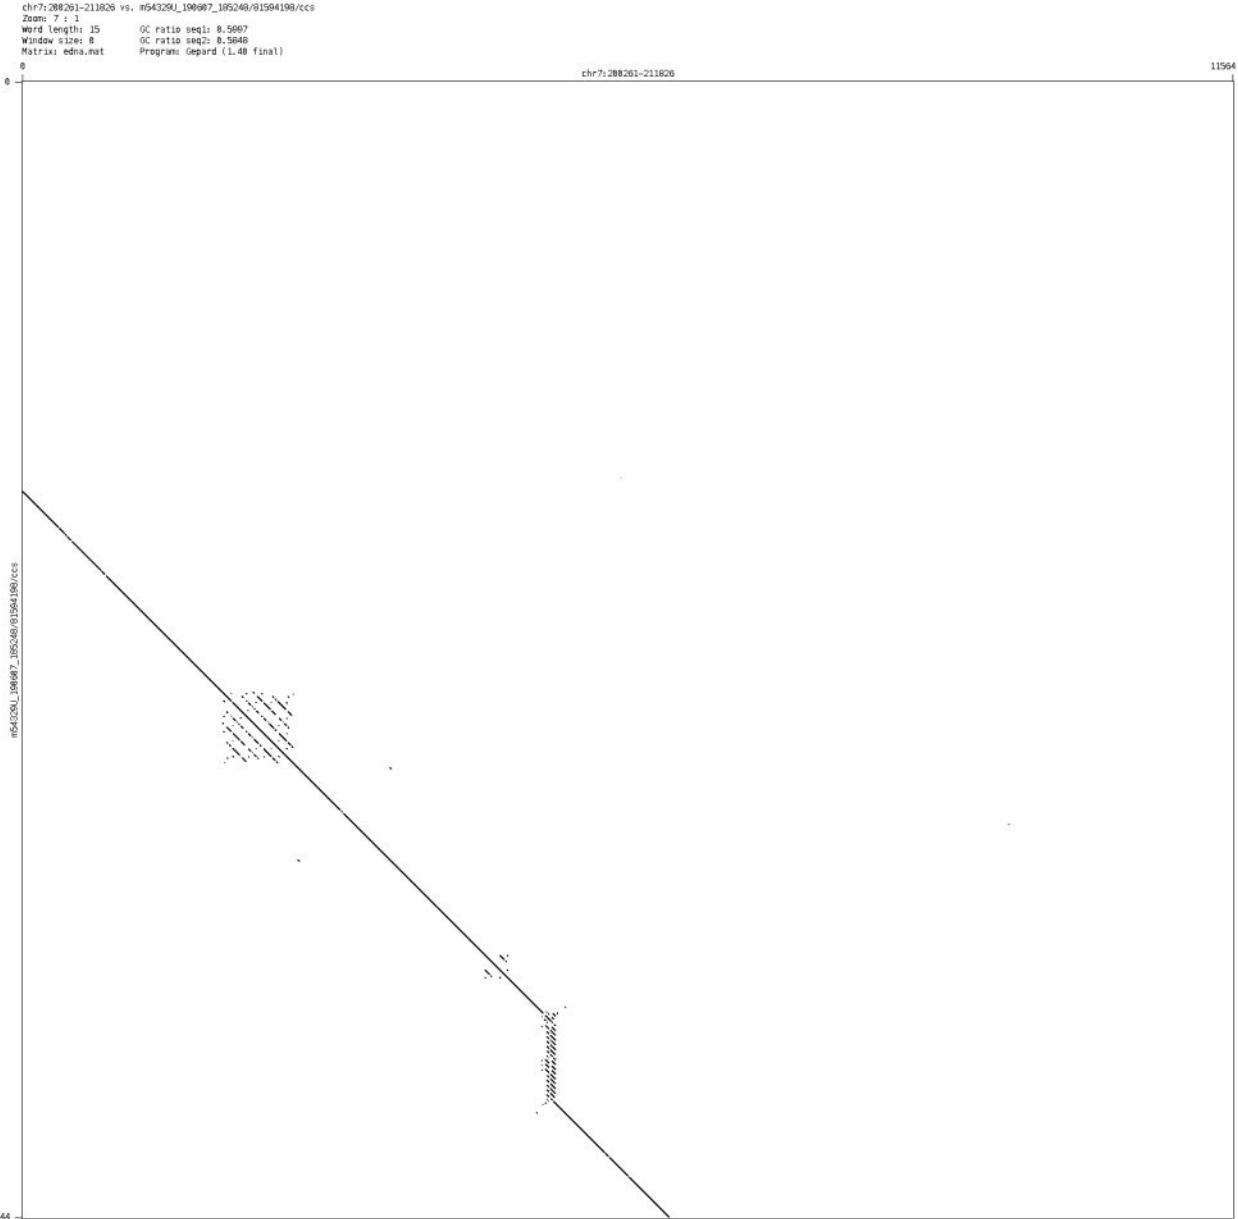

➤ chr7\_355960\_356050

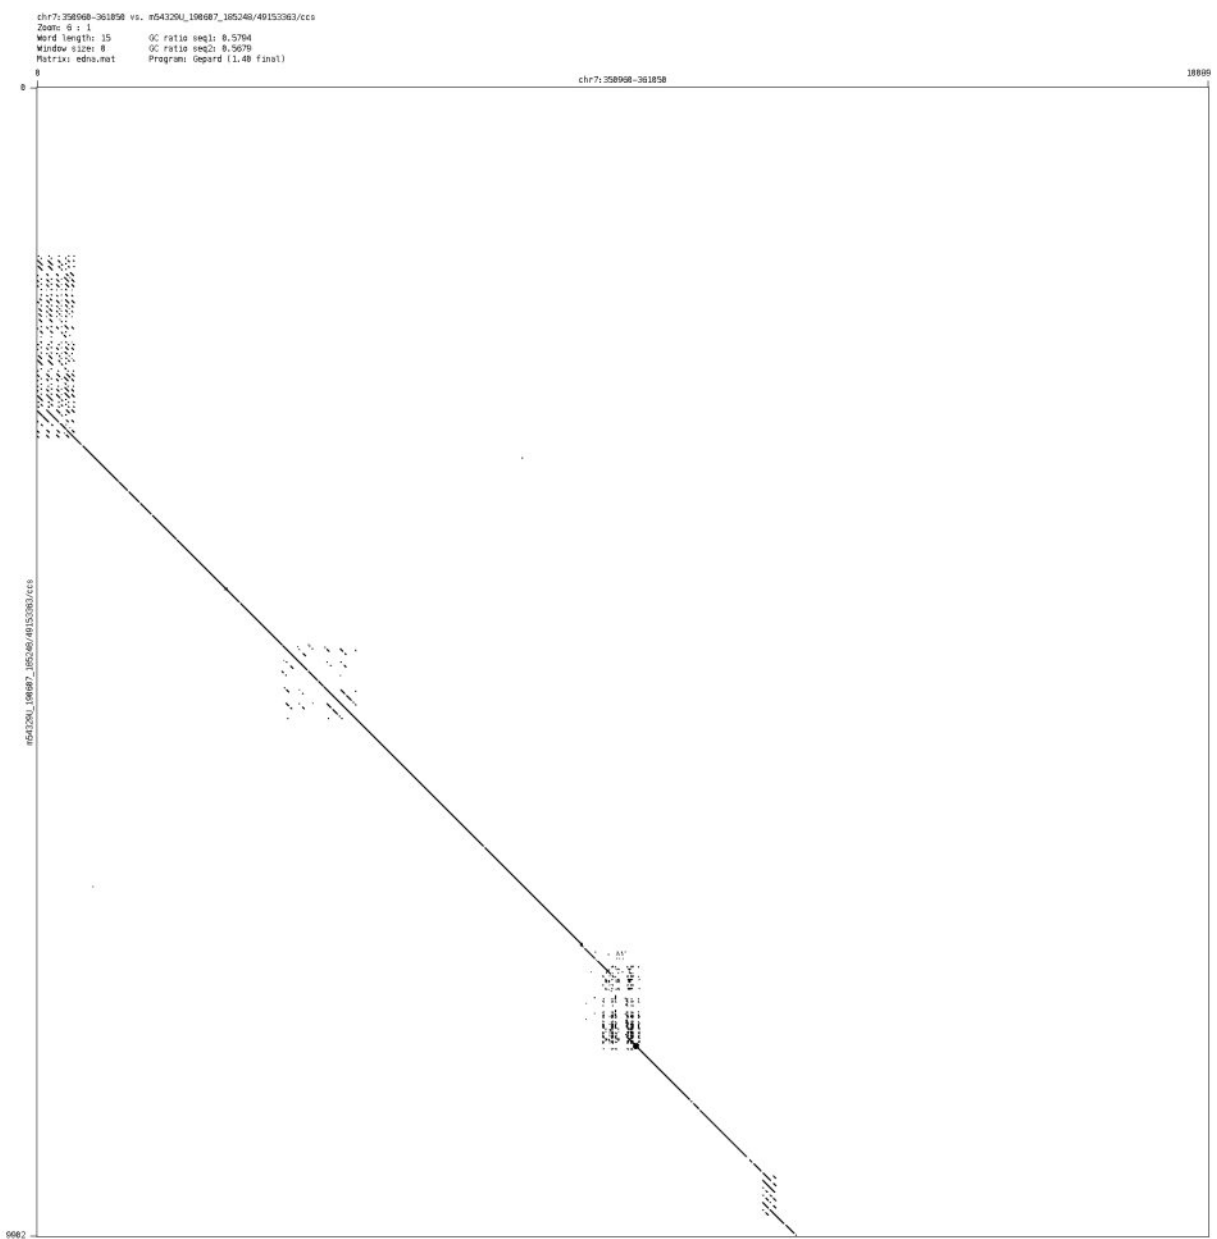

➤ chr7\_588557\_588704

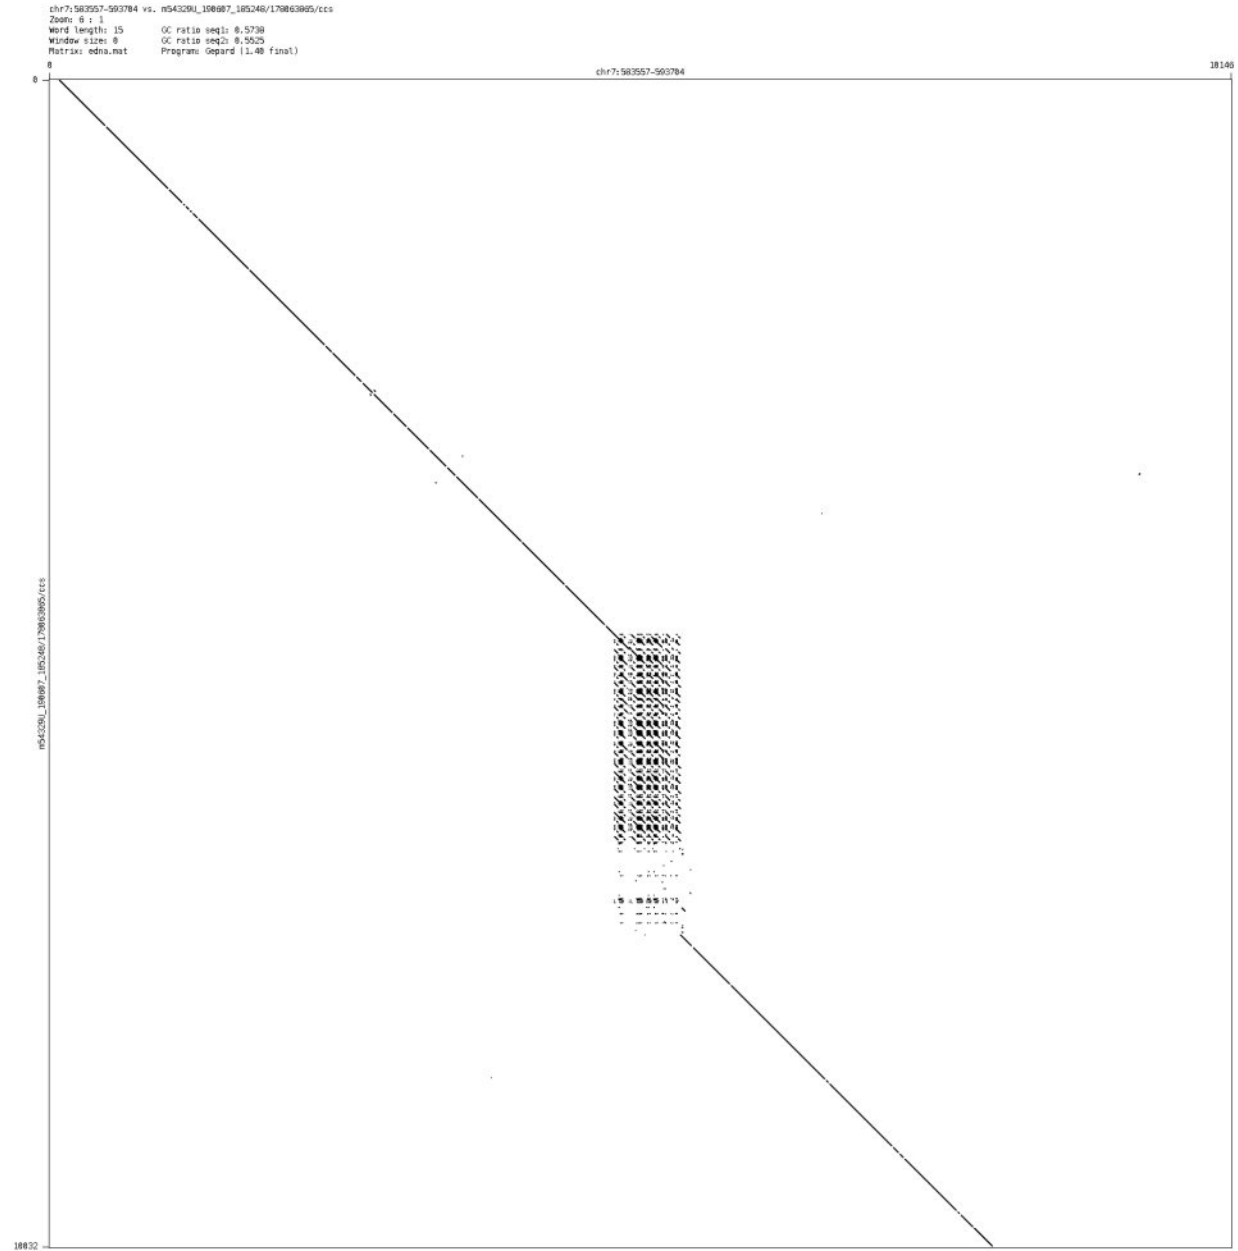

➤ chr7\_905588\_906538

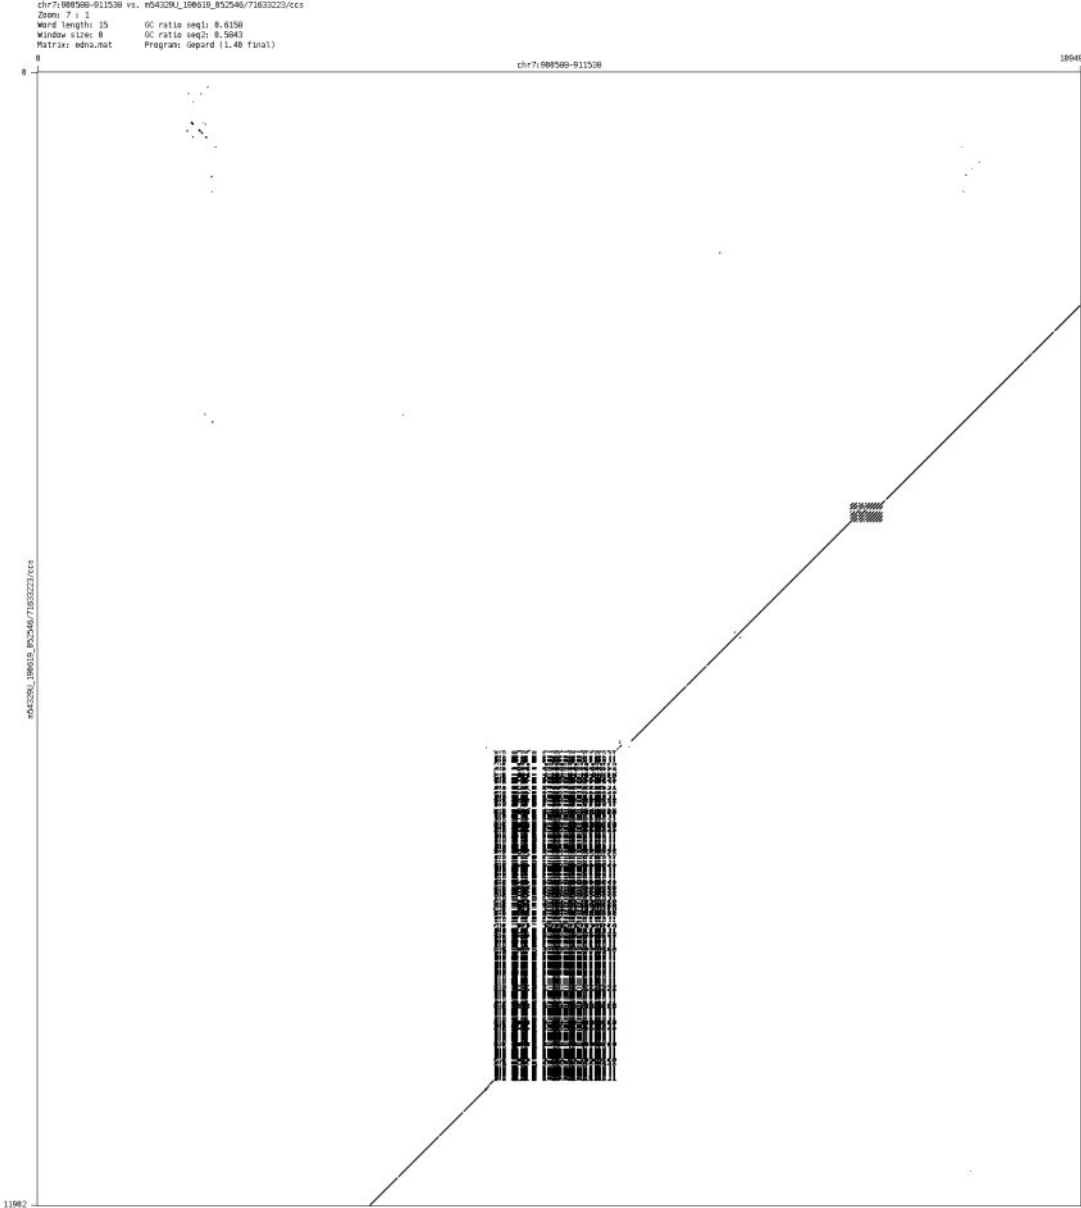

➤ chr7\_1758548\_1758613

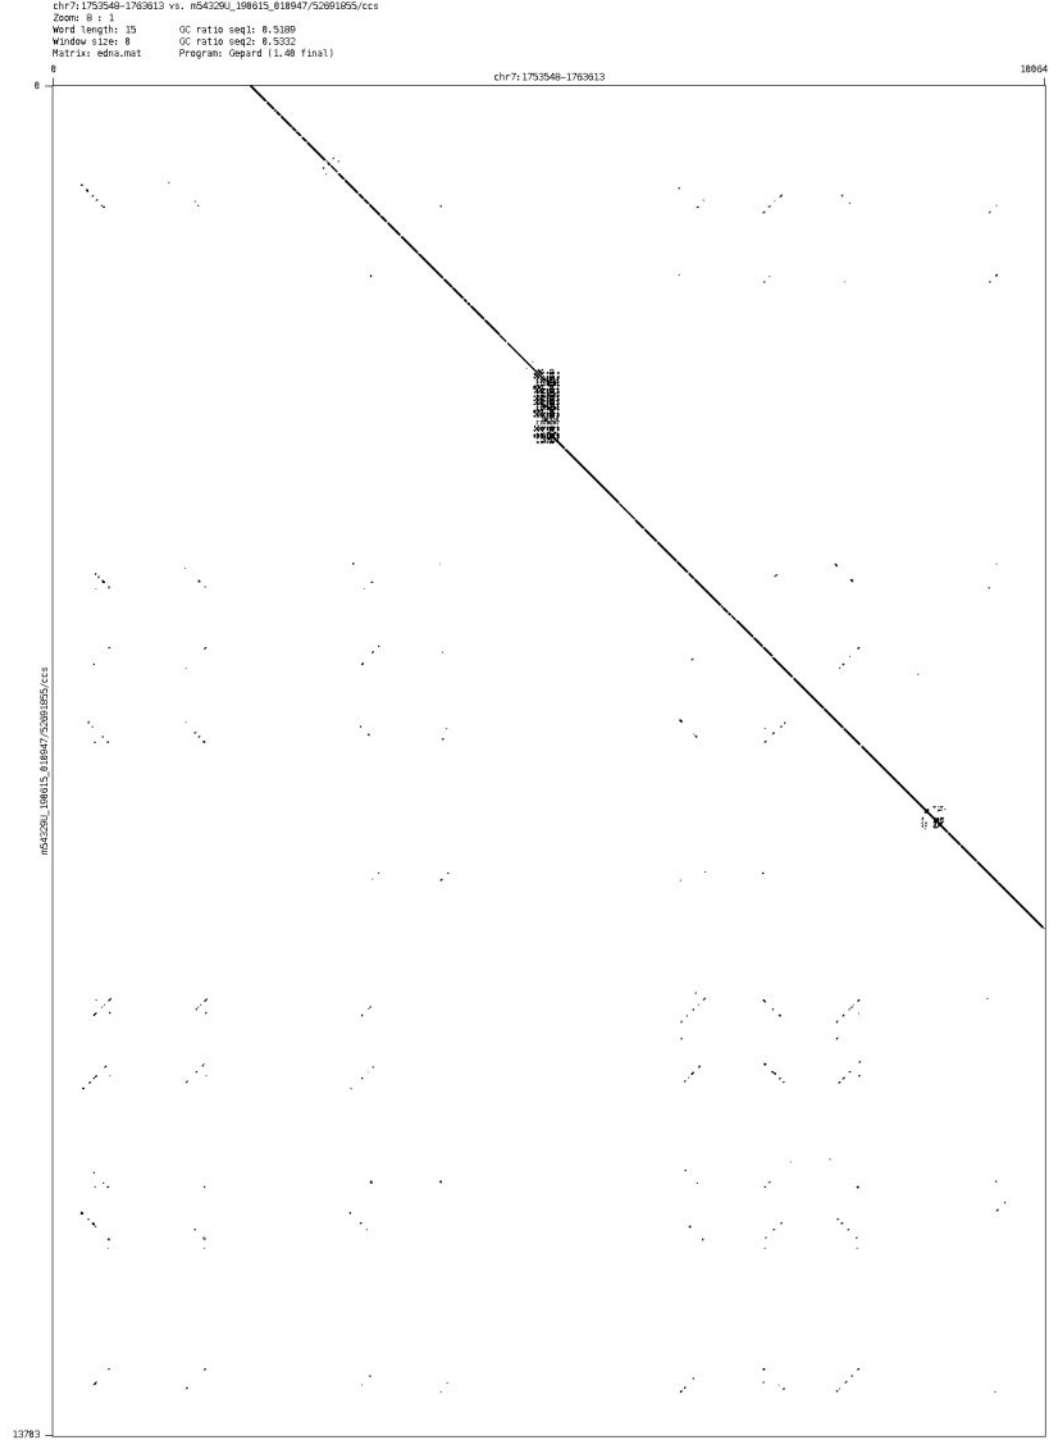



➤ chr7\_1940931\_1941009

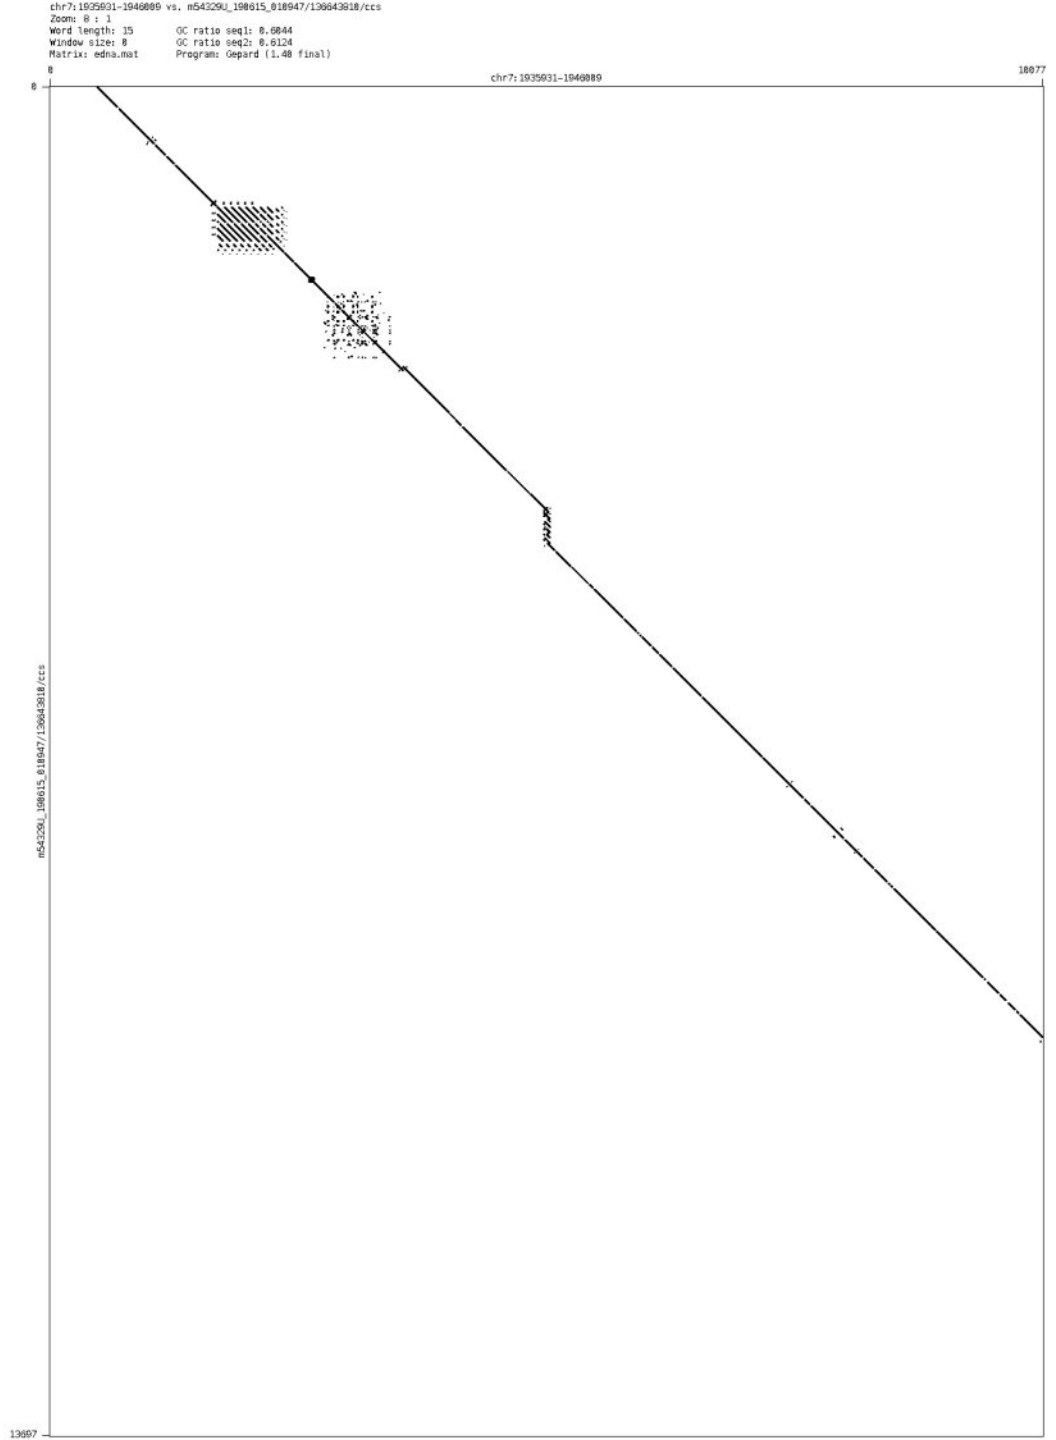

➤ chr7\_45610820\_45611071

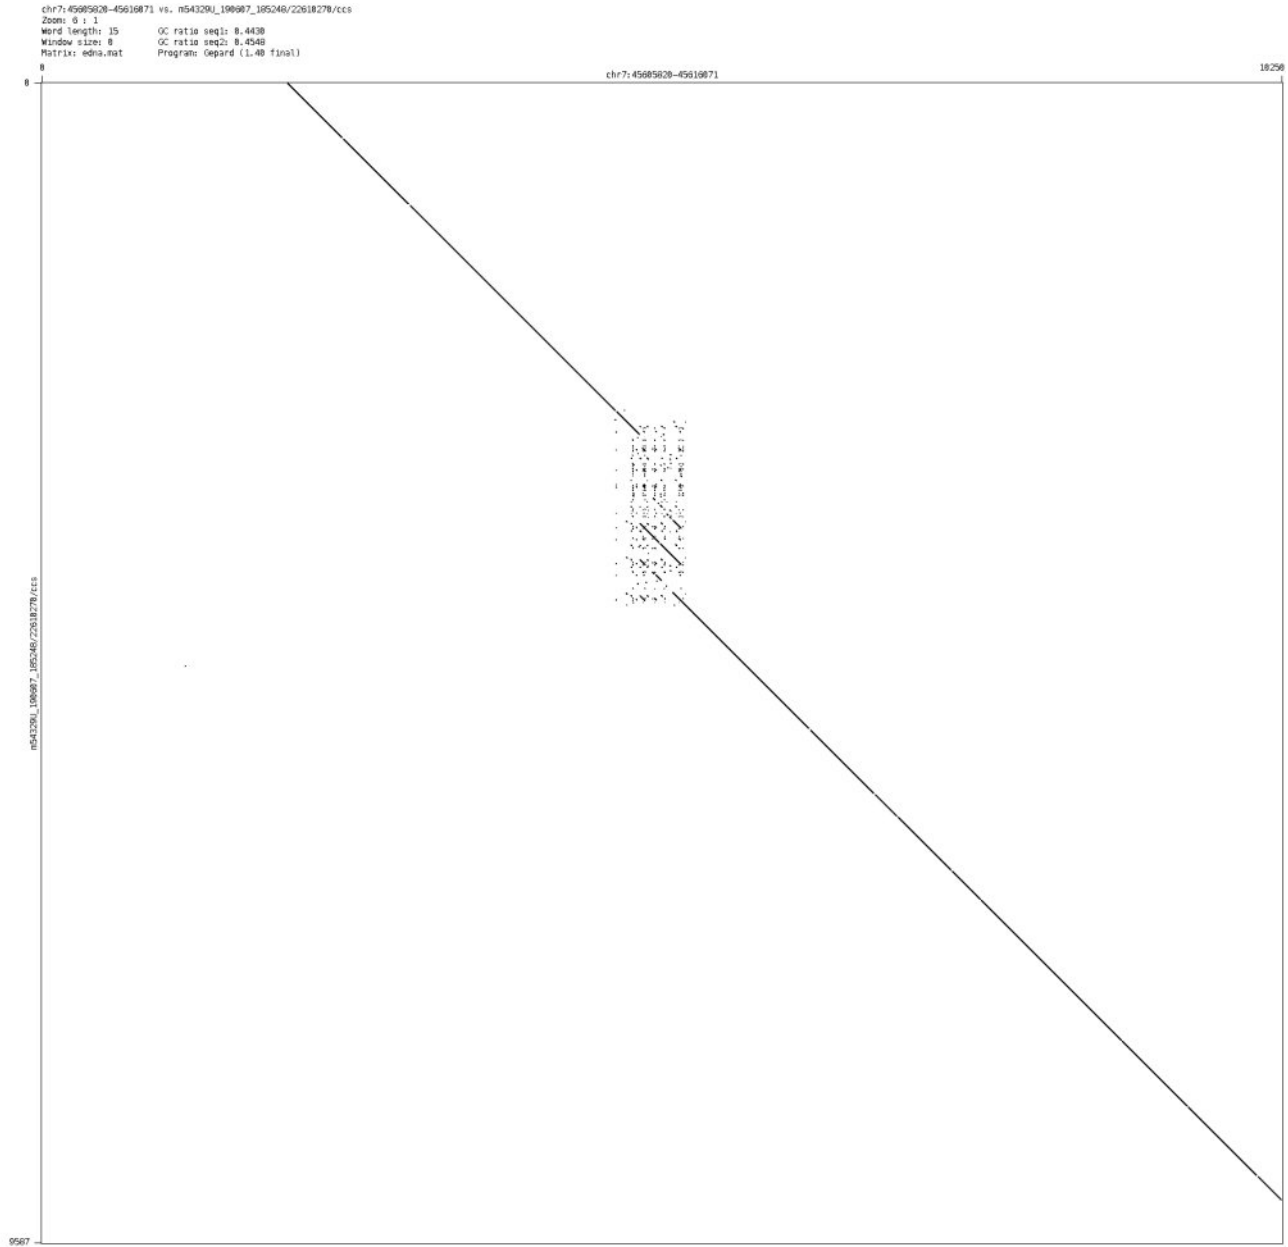

➤ chr7\_55167302\_55167528

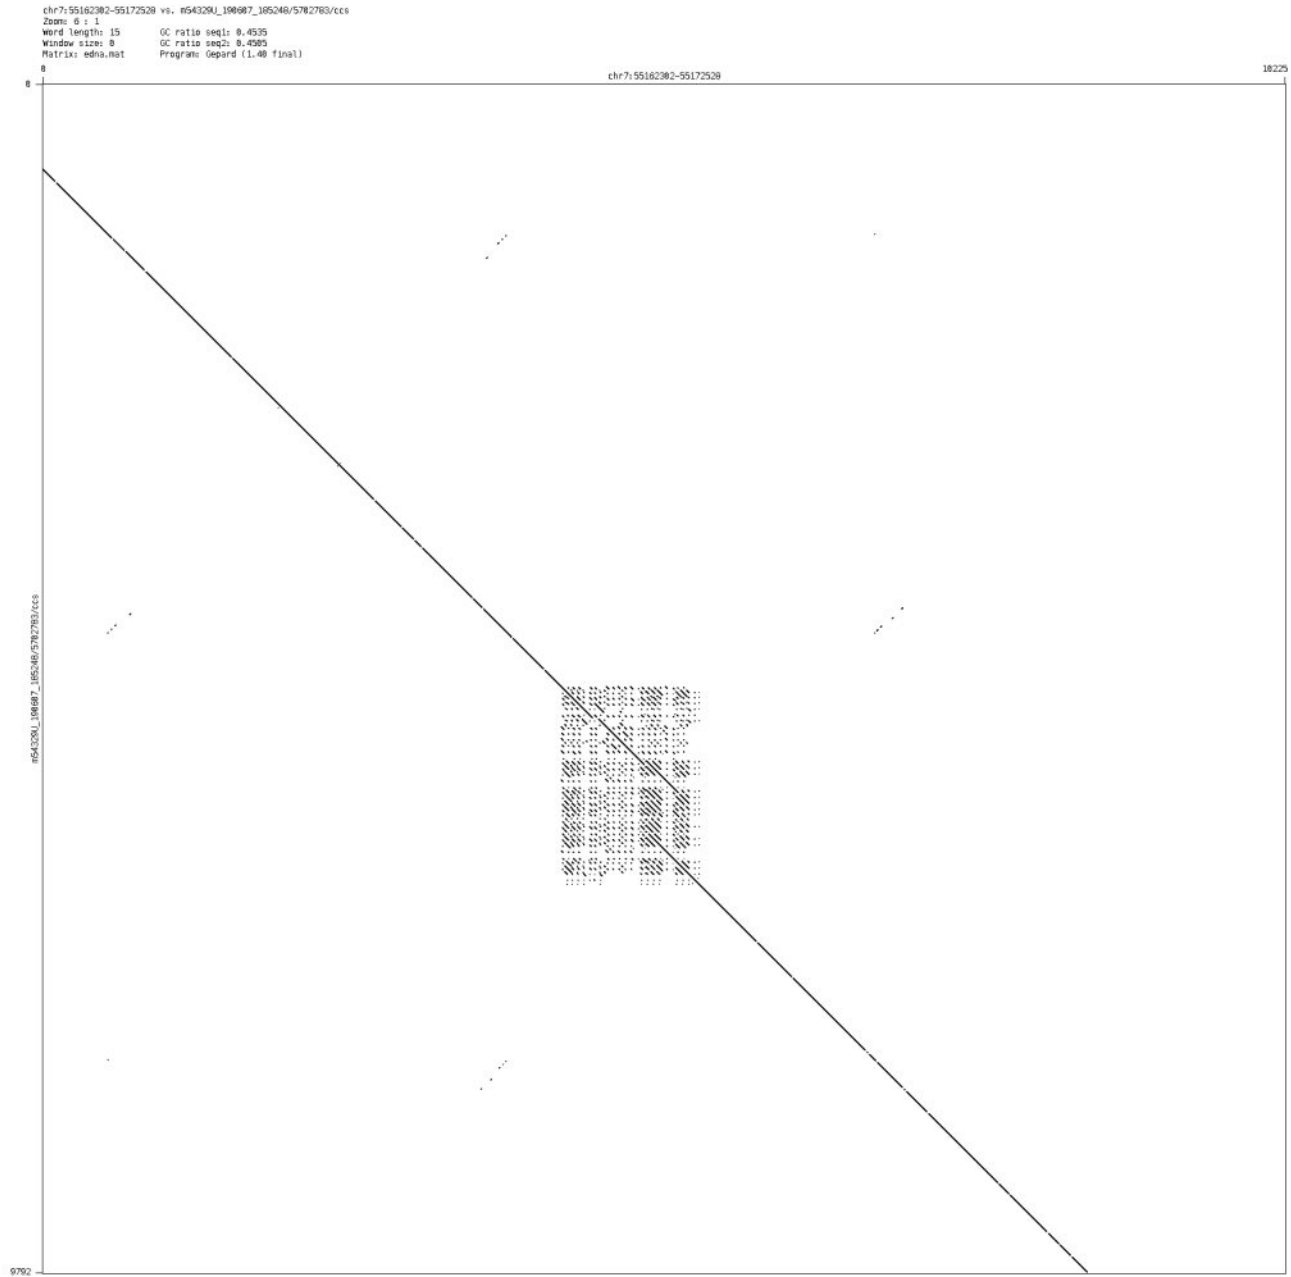

# ➤ chr7\_70955852\_70974154

chr7:70950852-70979154 vs. m54329U\_190607\_185248/135332422/ccs  
Zoom: 15 : 1  
Word length: 15 GC ratio seq1: 0.4474  
Window size: 0 GC ratio seq2: 0.4449  
Matrix: edna.mat Program: Gepard (1.40 final)

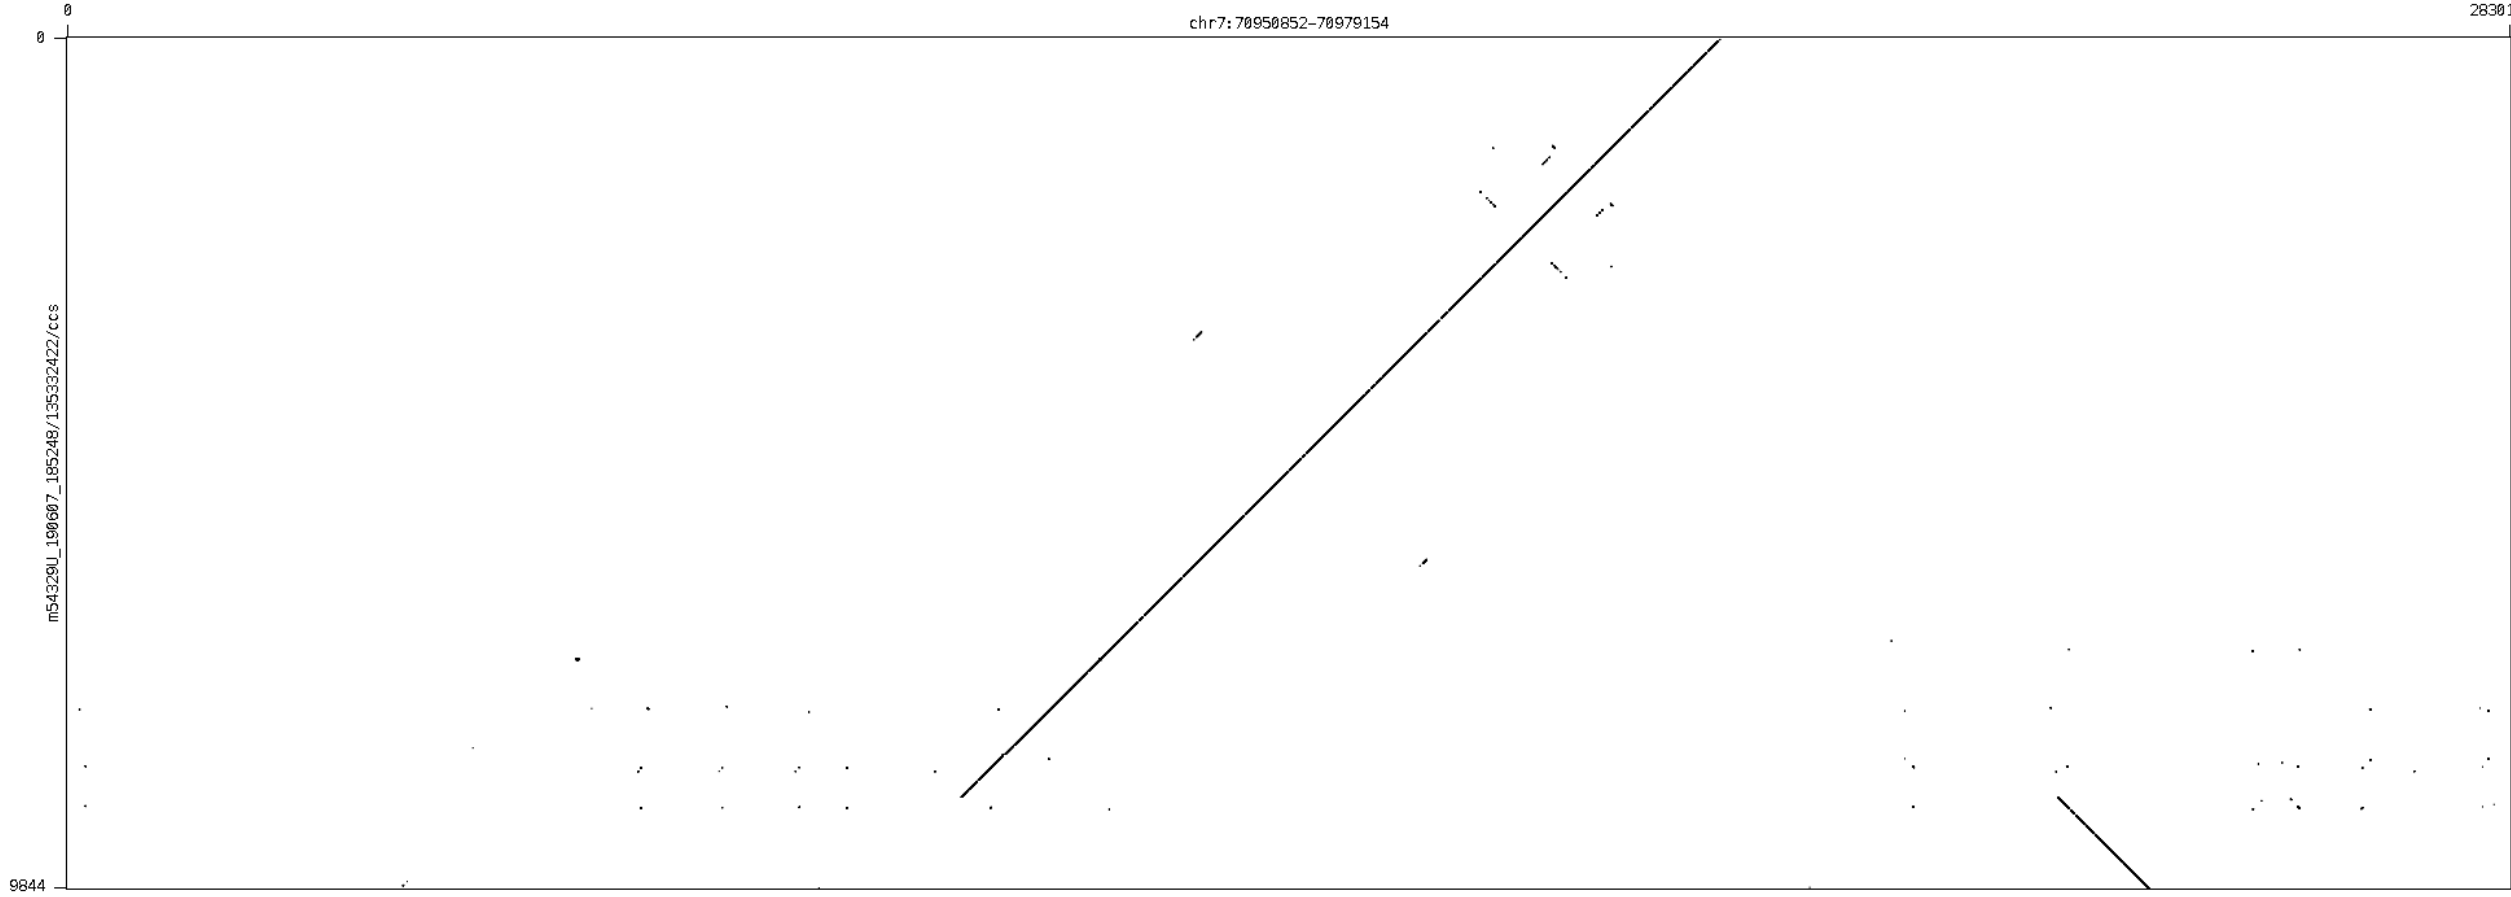

➤ chr7\_76997407\_76998955

chr7:76992487-77883955 vs. m54329U\_198615\_018947/18416244/ccs  
Zoom: 8 : 1  
Word Length: 15 GC ratio seq1: 0.6607  
Window size: 0 GC ratio seq2: 0.5968  
Matrix: edna.mat Program: Gepard (1.48 final)

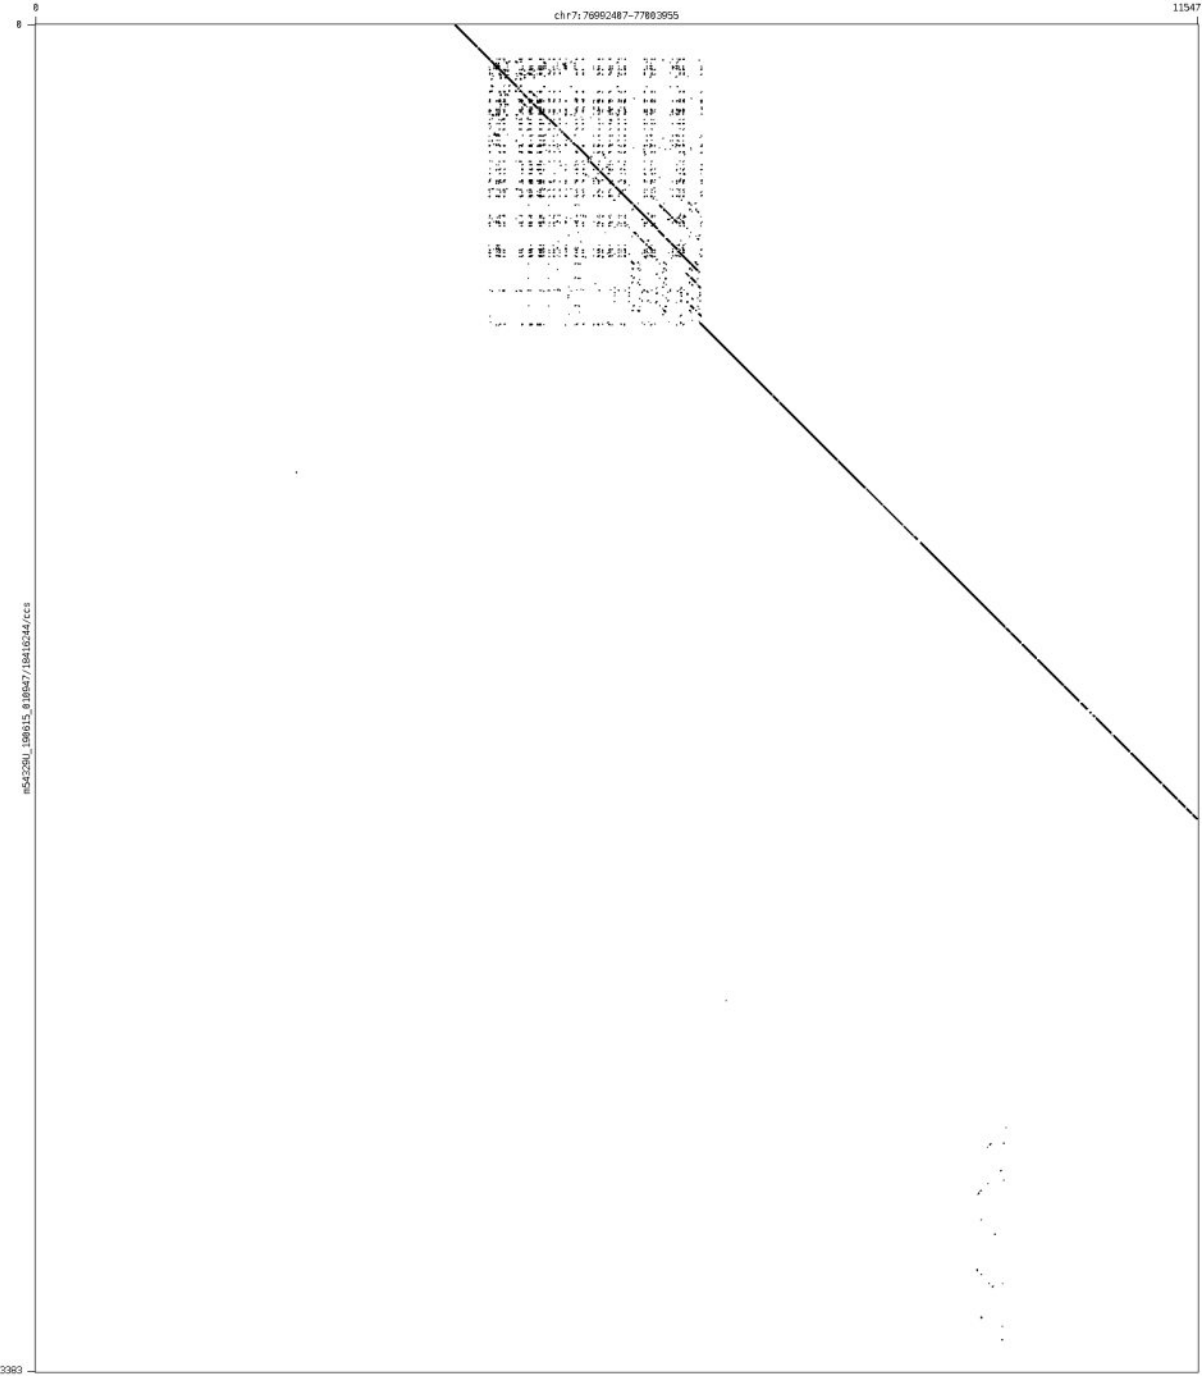

➤ chr7\_85460059\_85462014

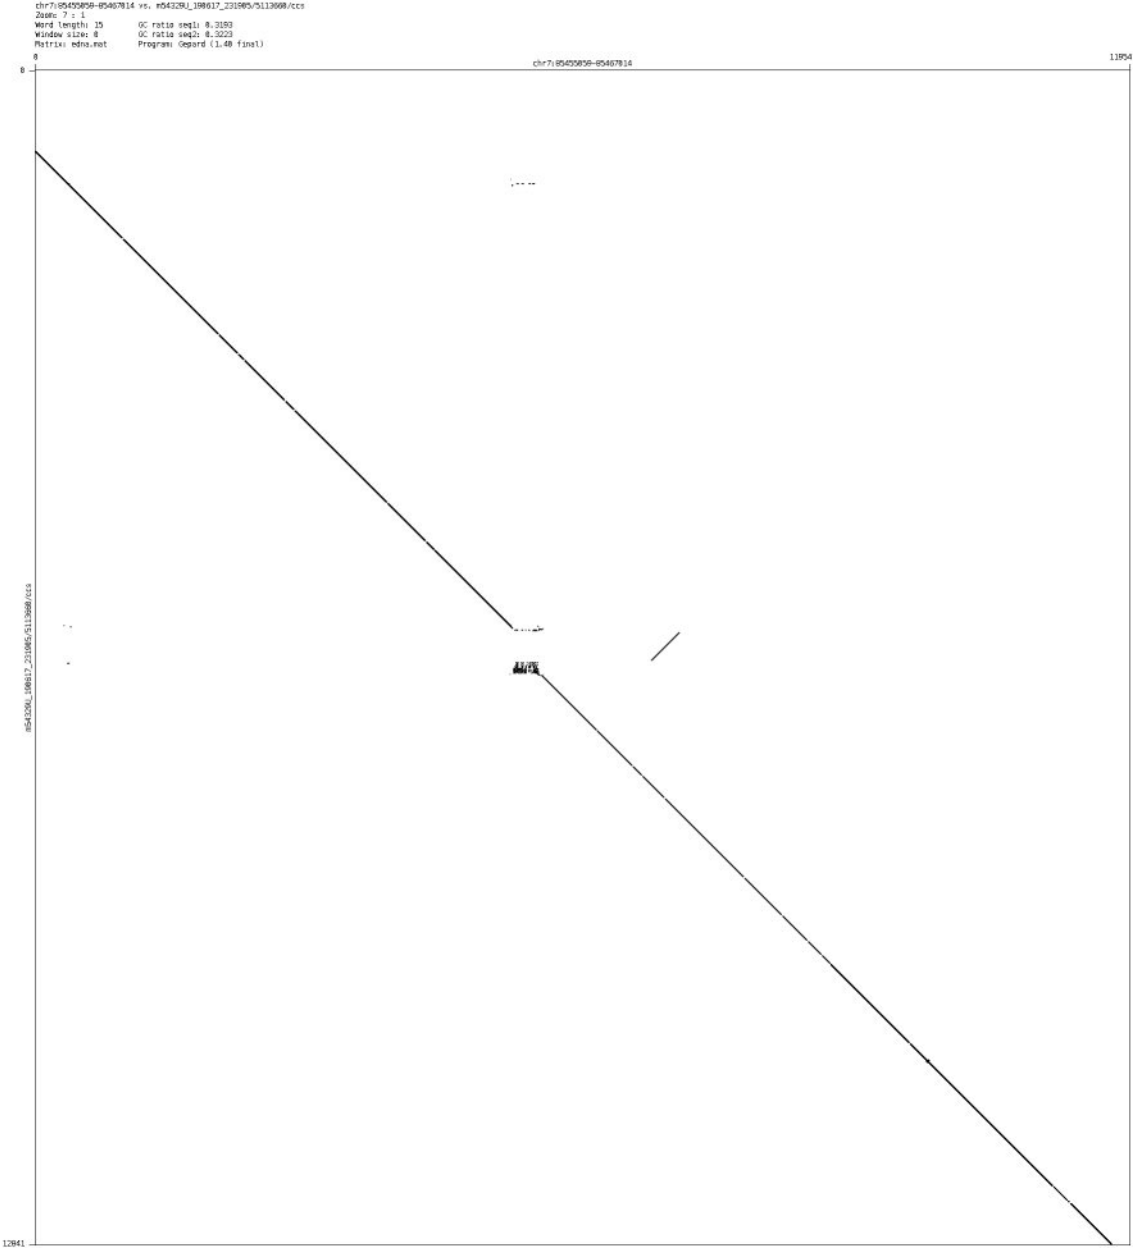

➤ chr7\_98811382\_98811519

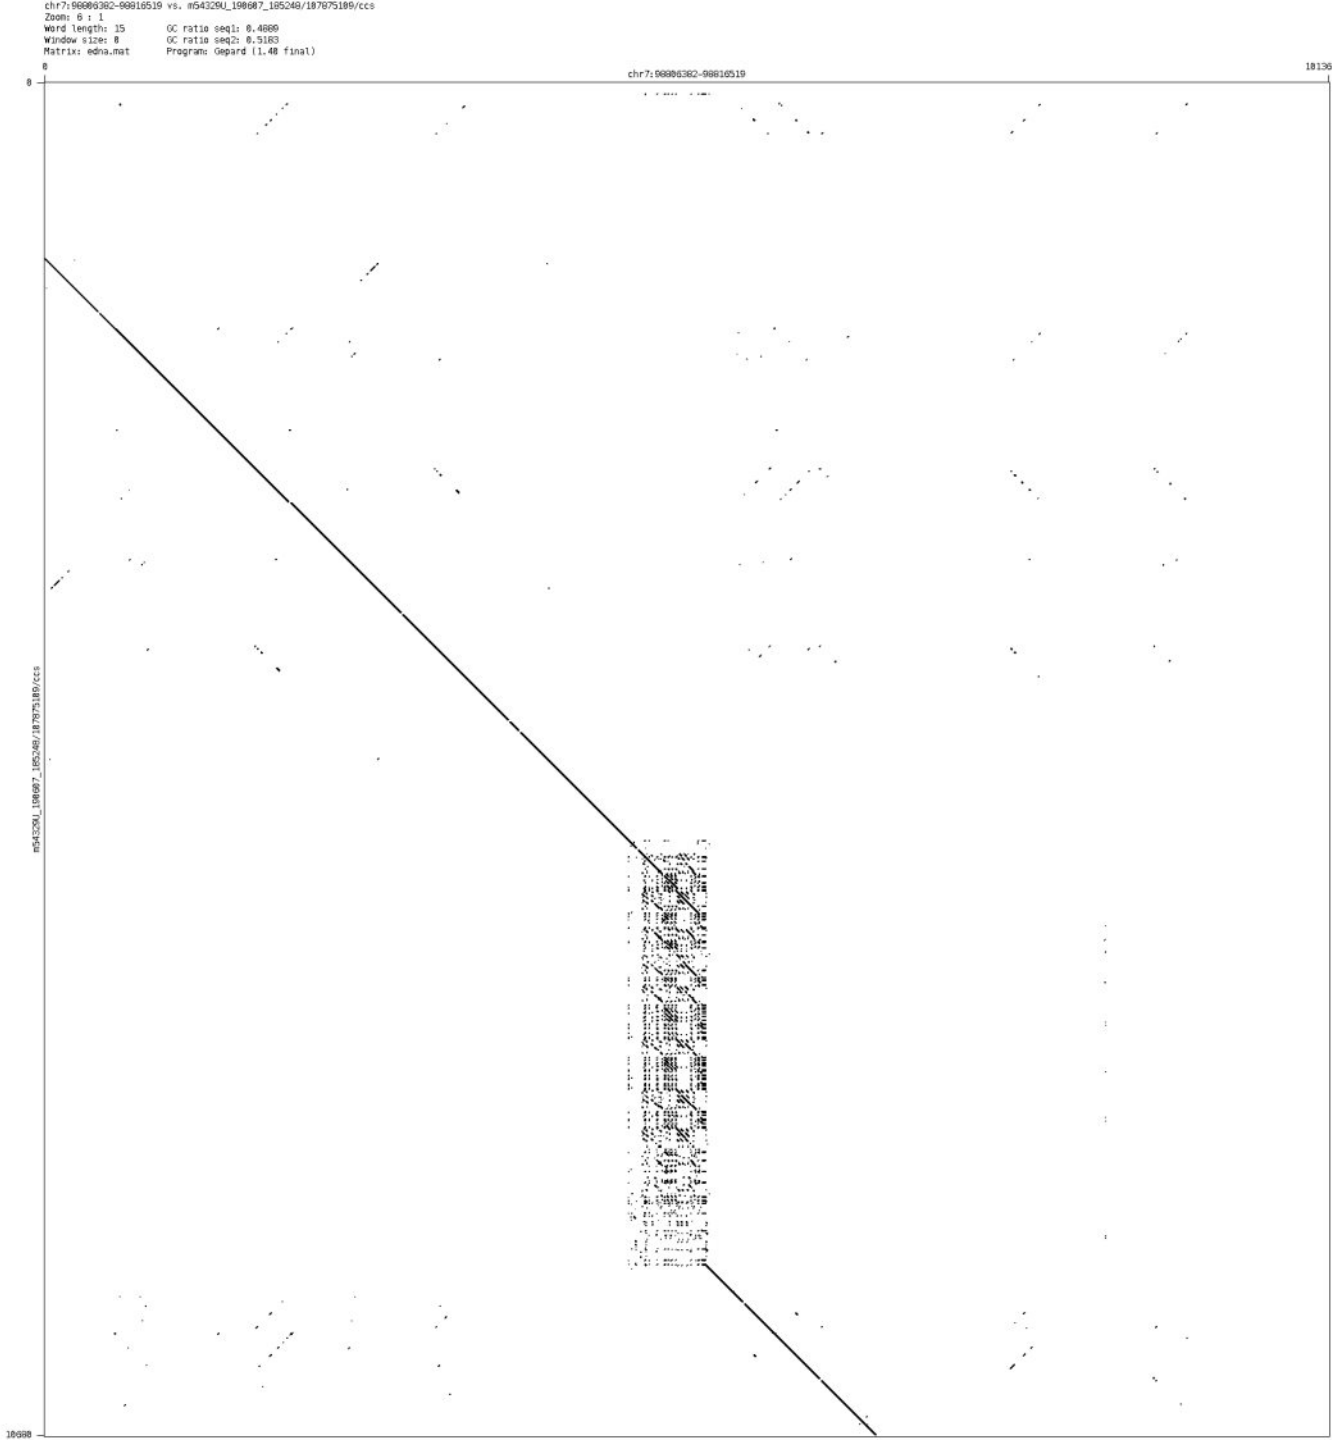

➤ chr7\_100957703\_100958508

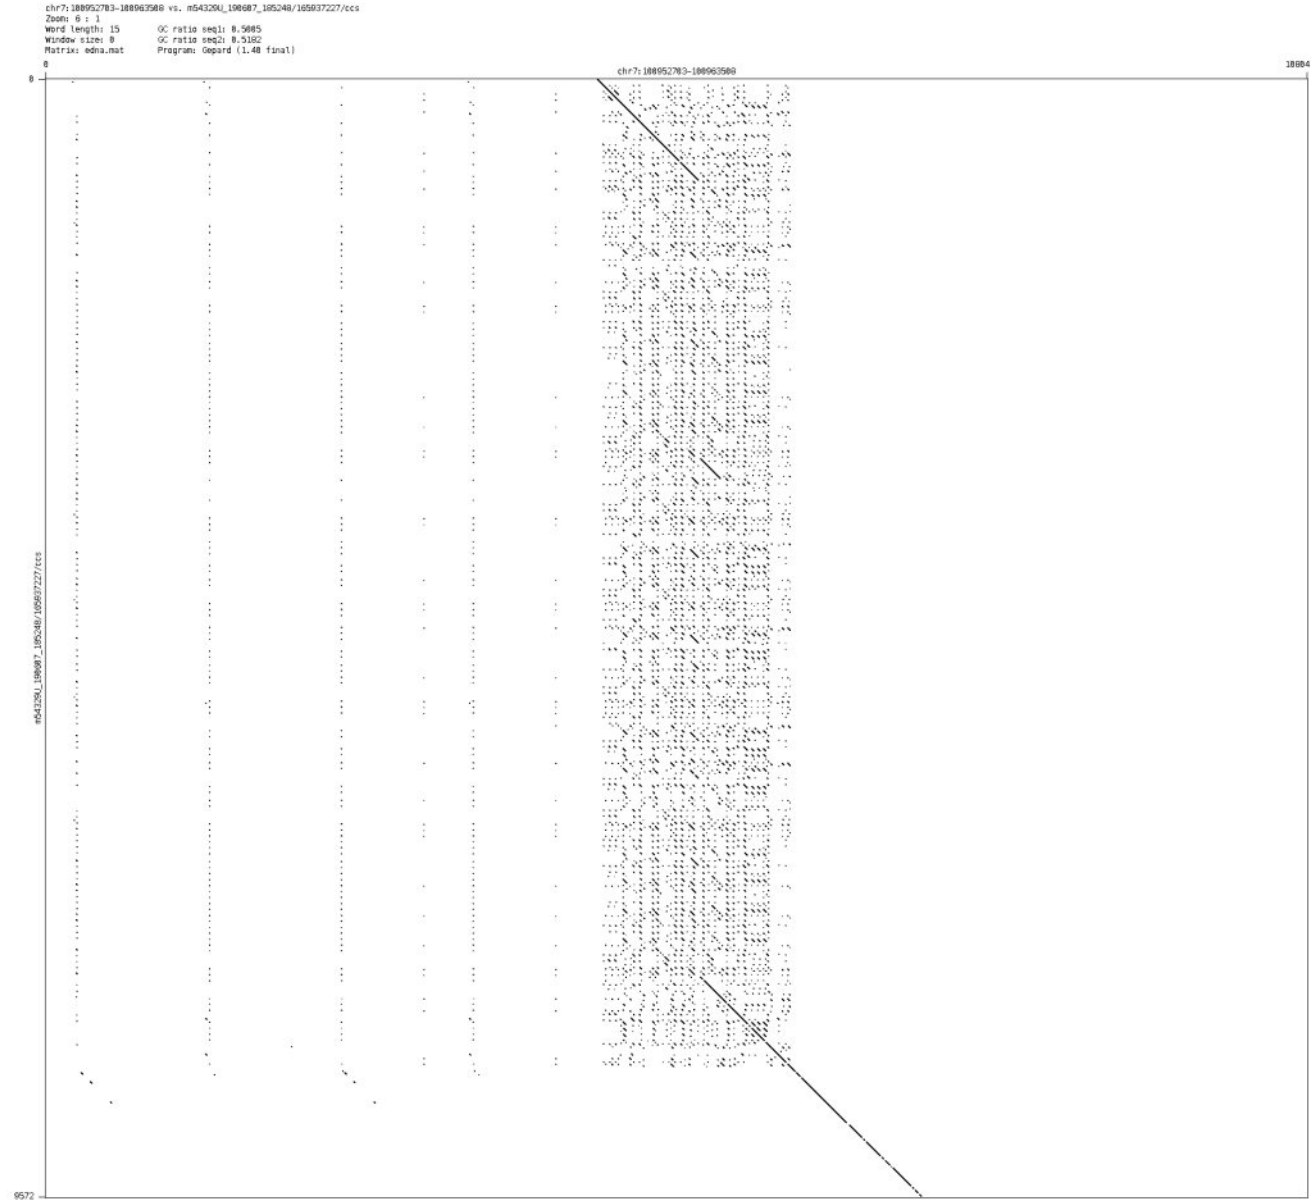



➤ chr7\_102080906\_102085205

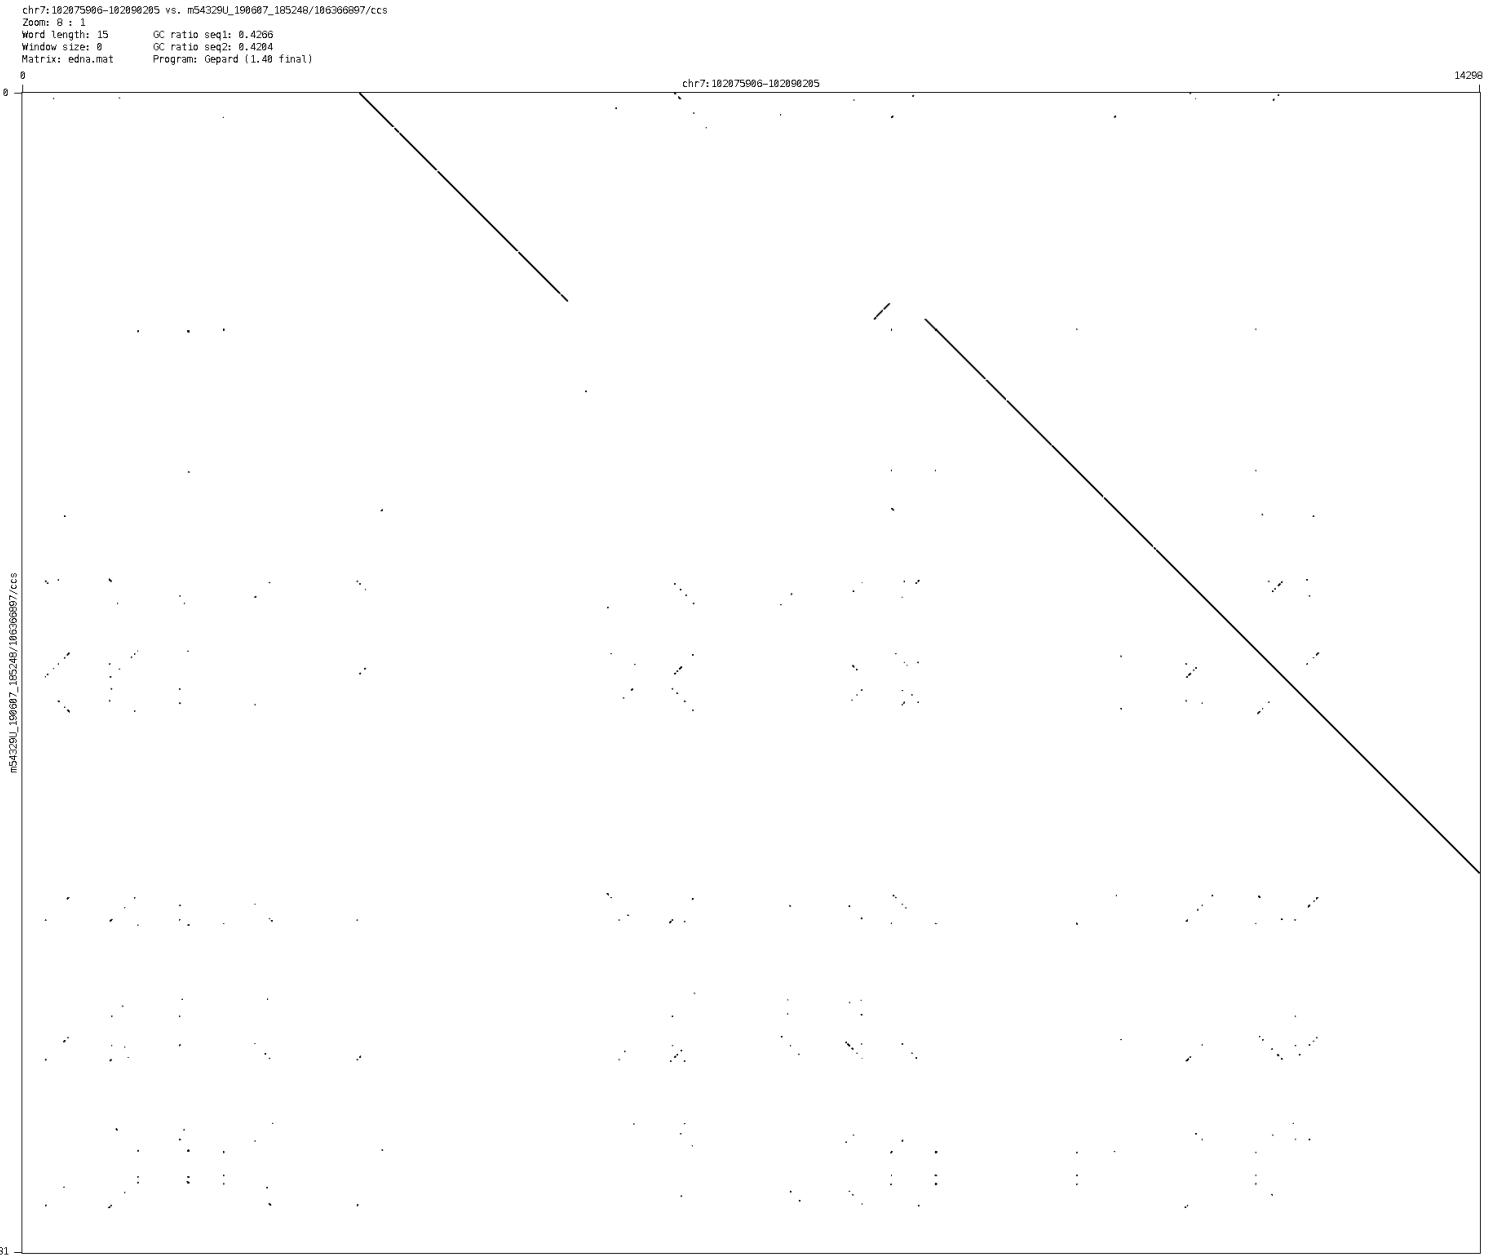

➤ chr7\_138621939\_138622106

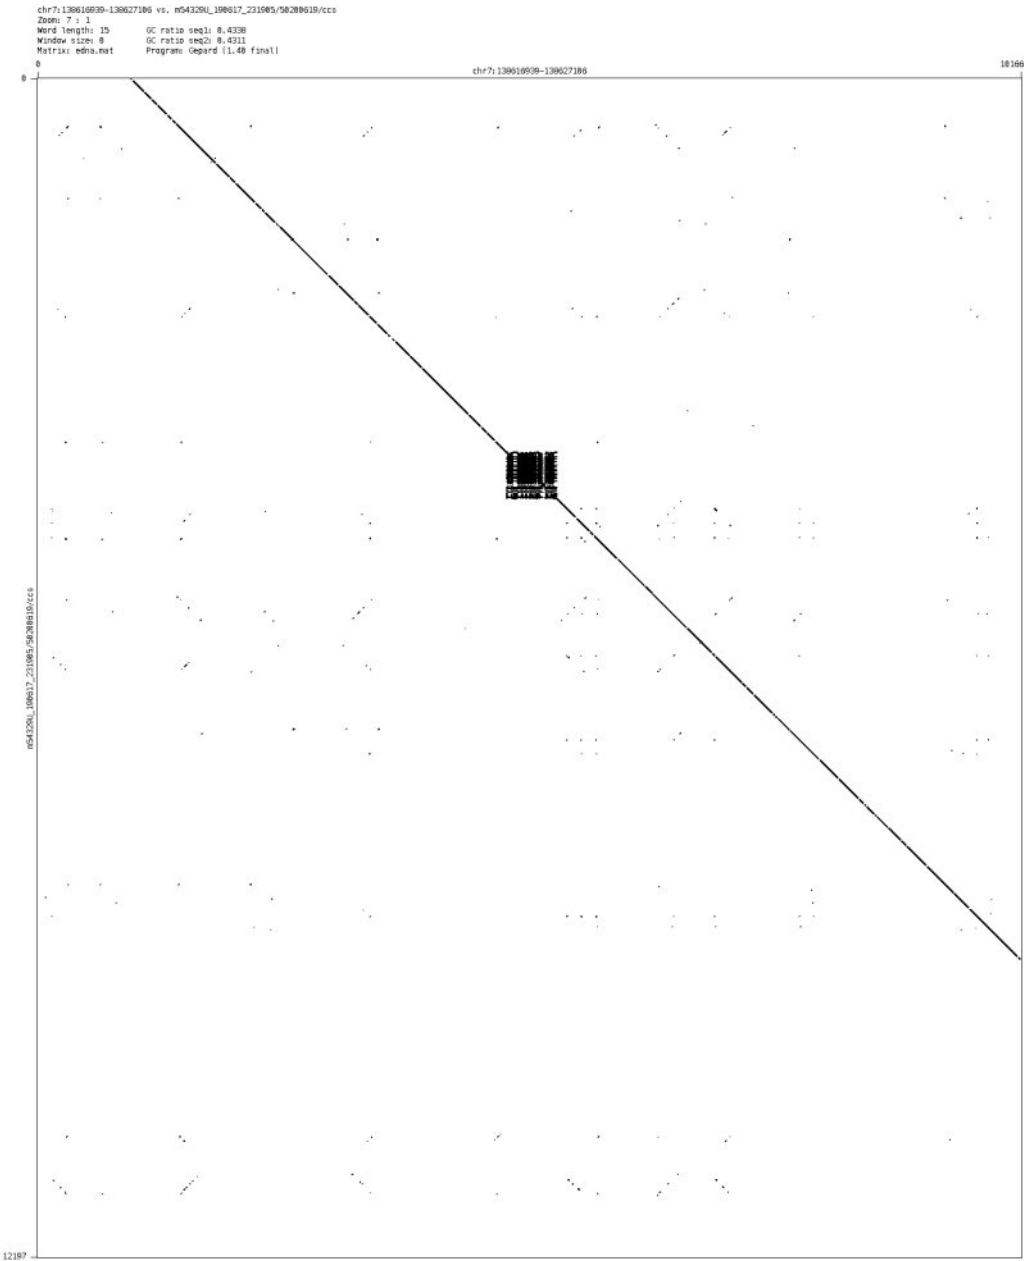

➤ chr7\_150909790\_150910469

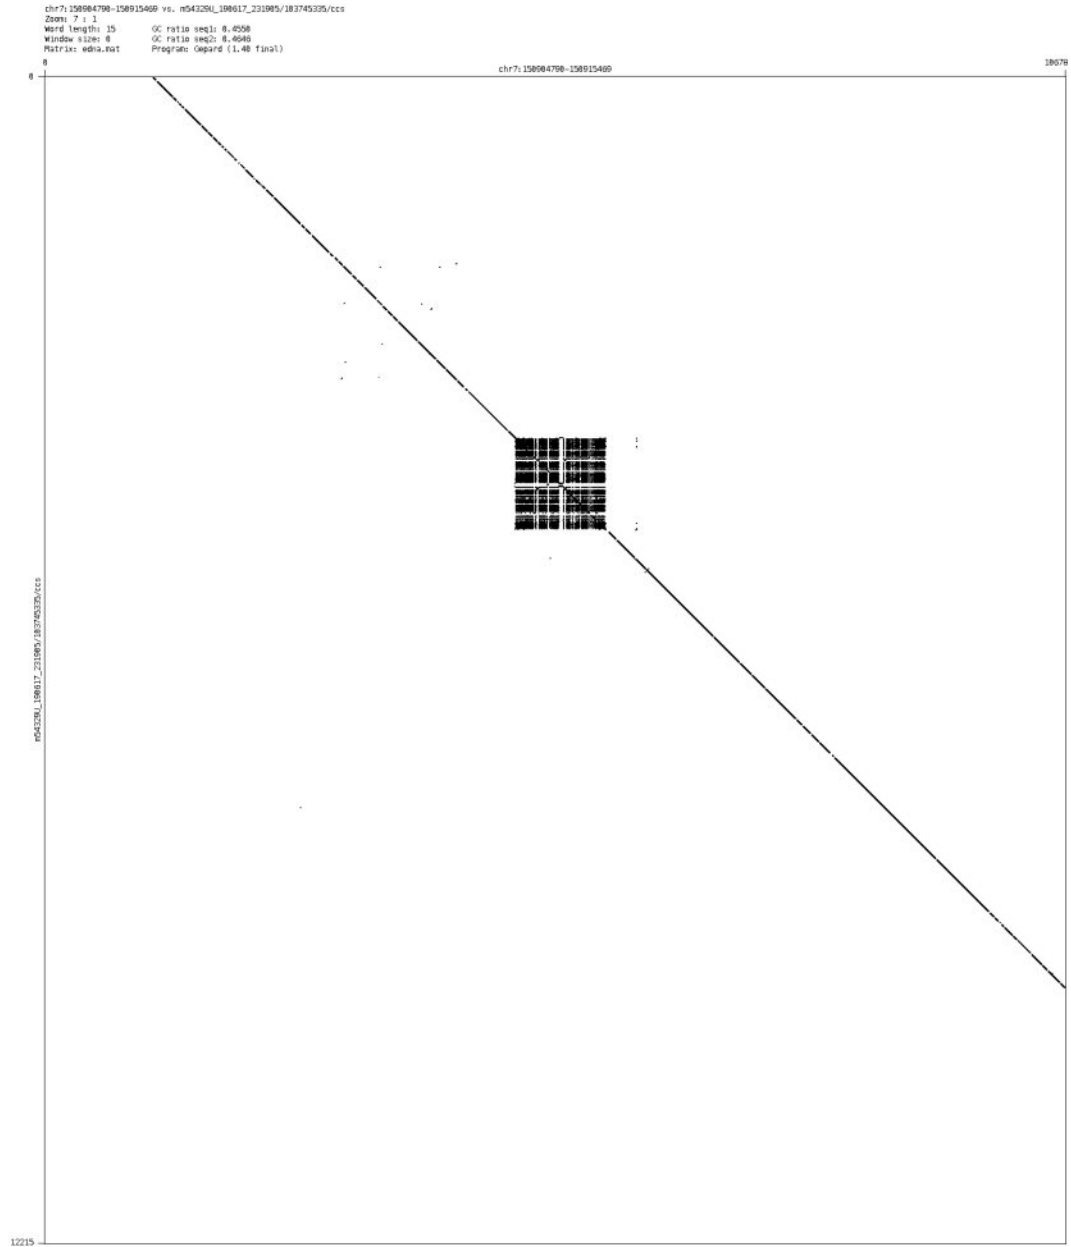

➤ chr7\_151855231\_151855587

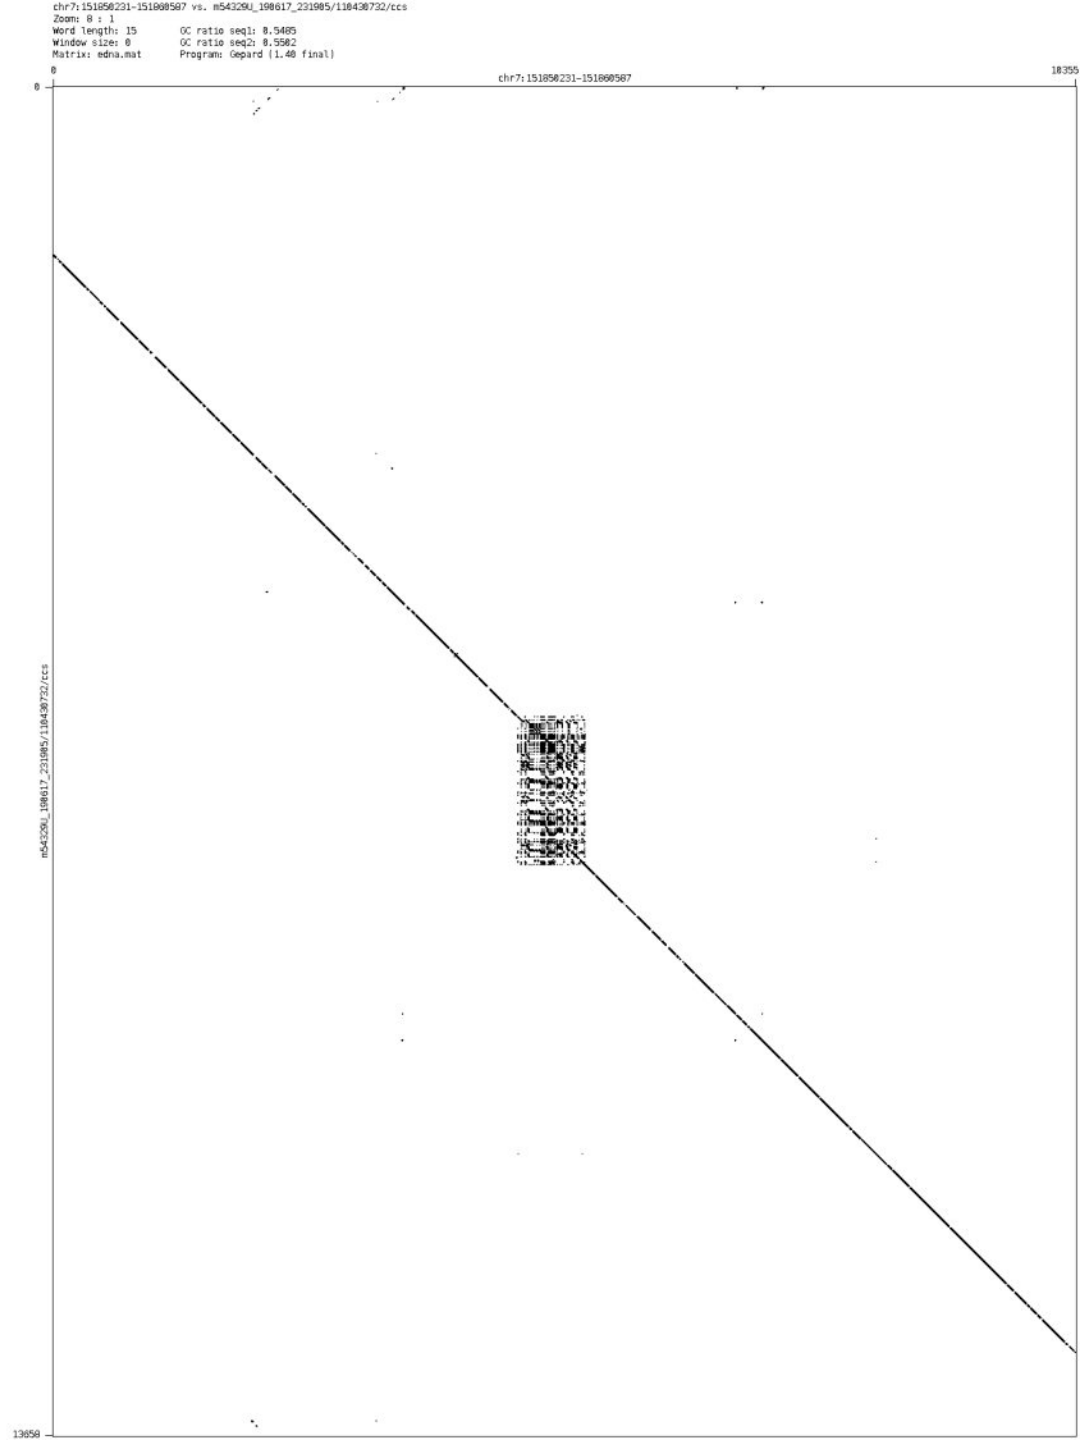

➤ chr7\_155207777\_155208913

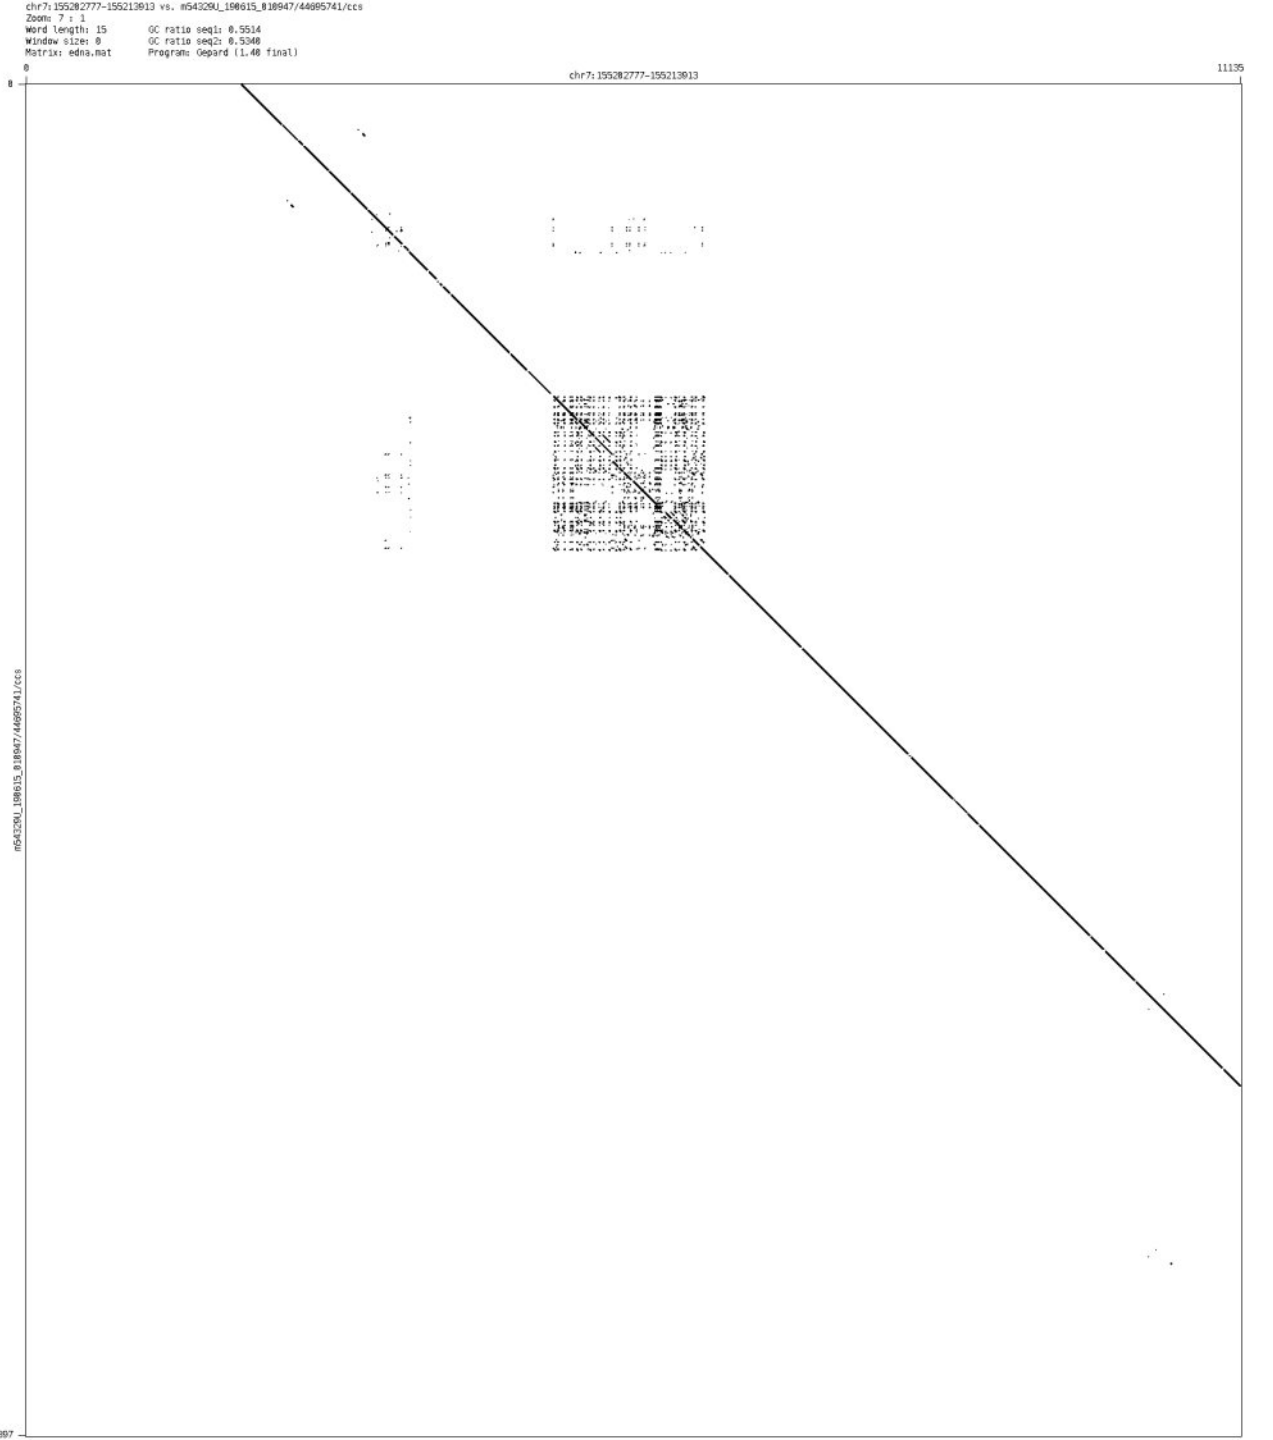

➤ chr7\_155328712\_155328857

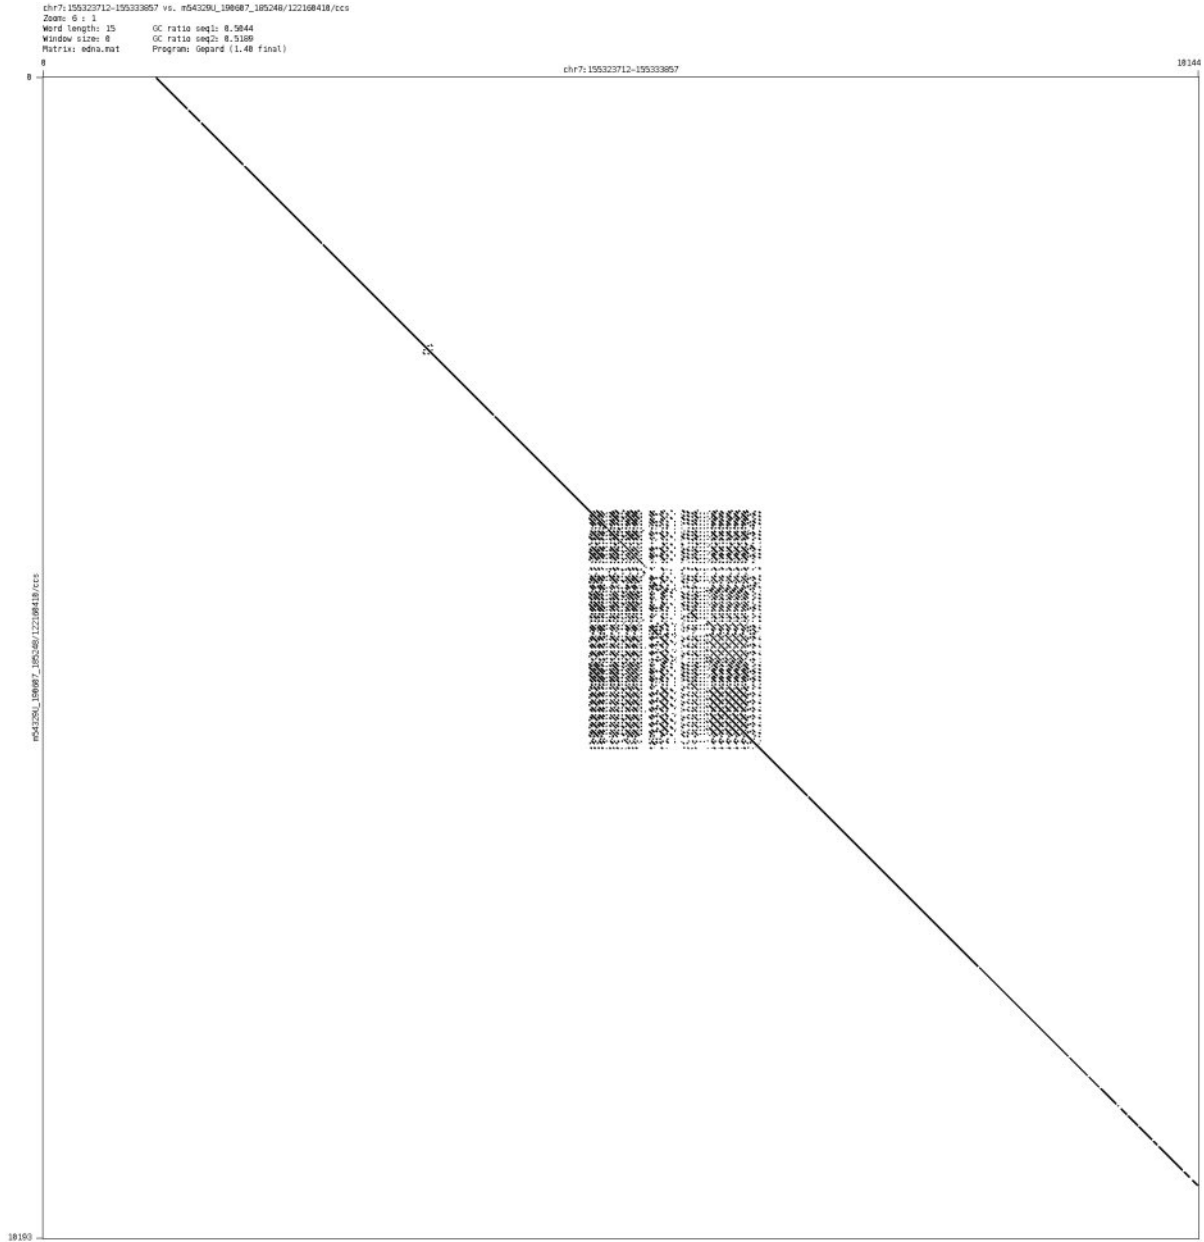

➤ chr7\_155406971\_155407121

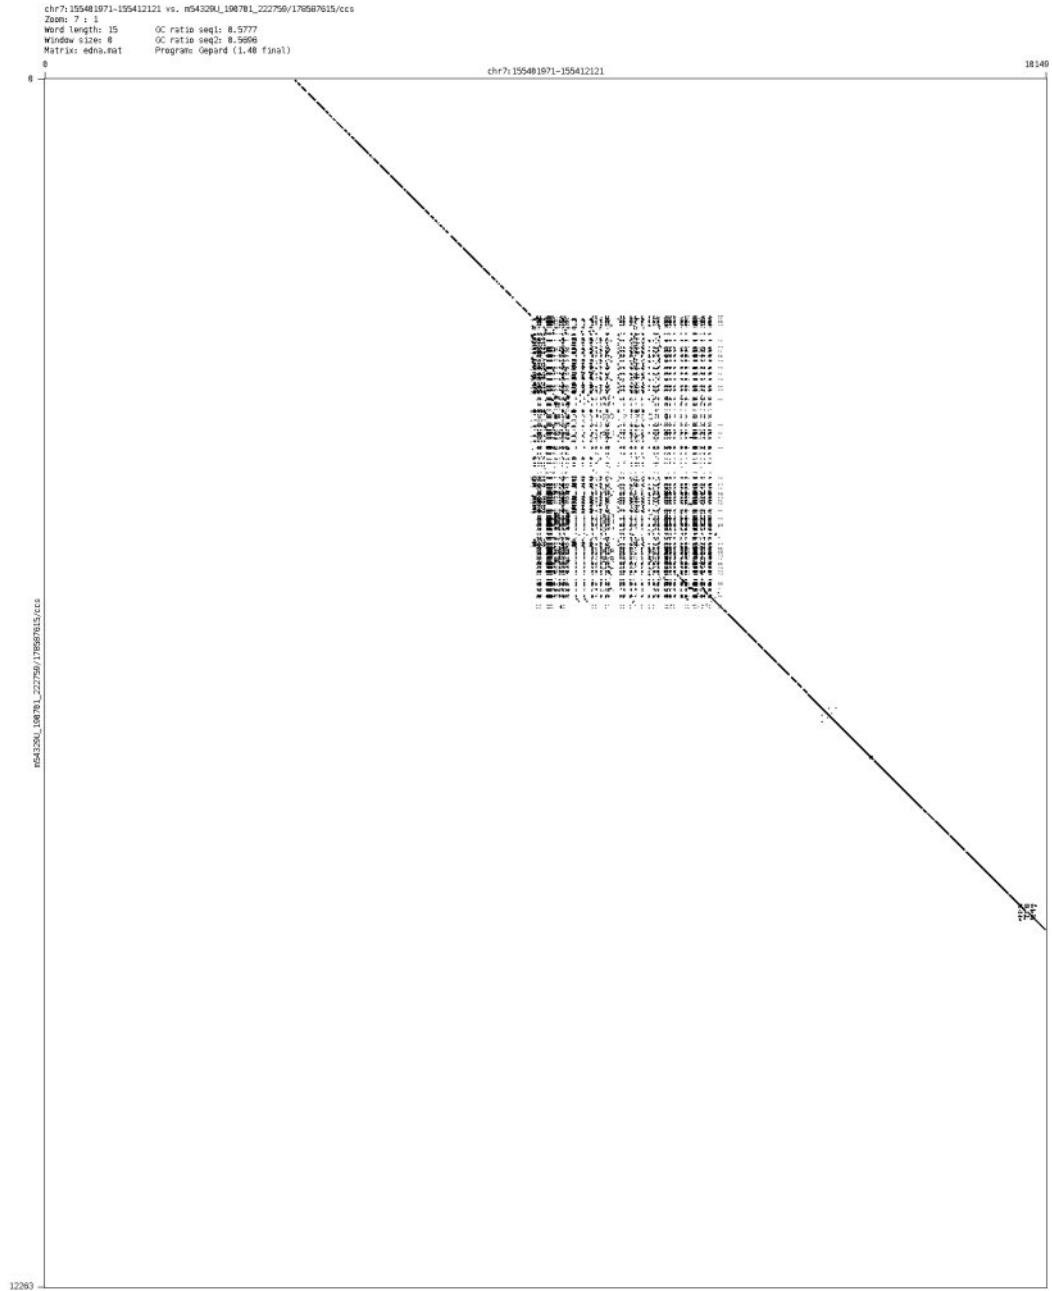

➤ chr7\_155615228\_155615438

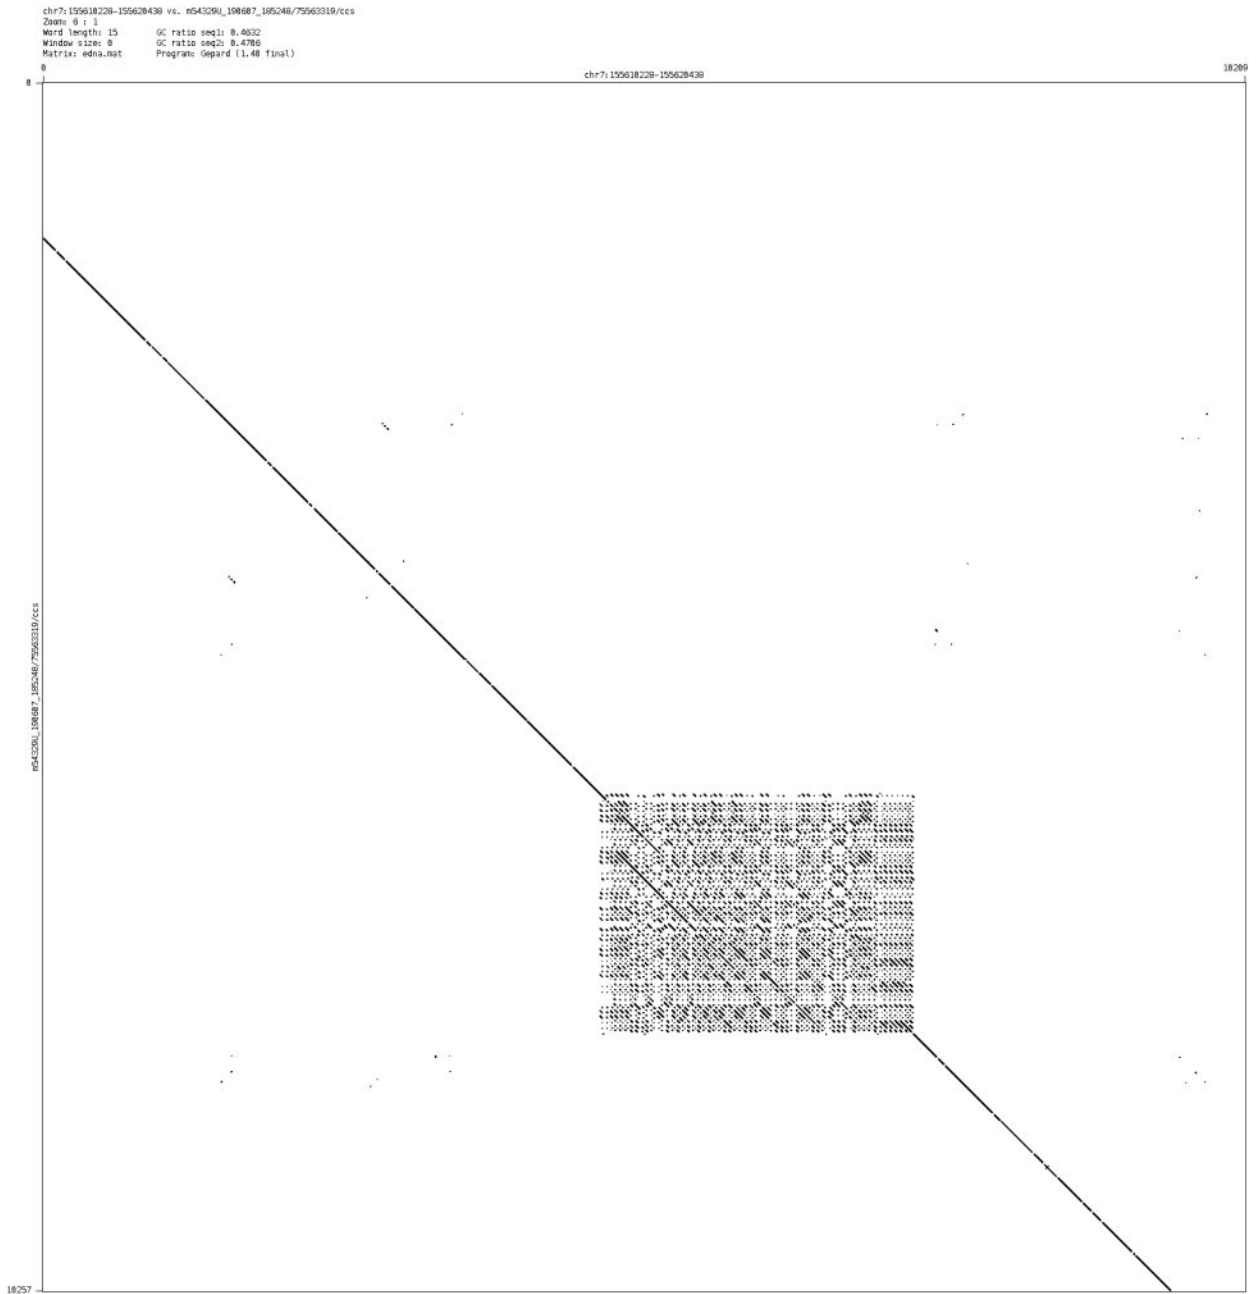



➤ chr7\_155792027\_155792109

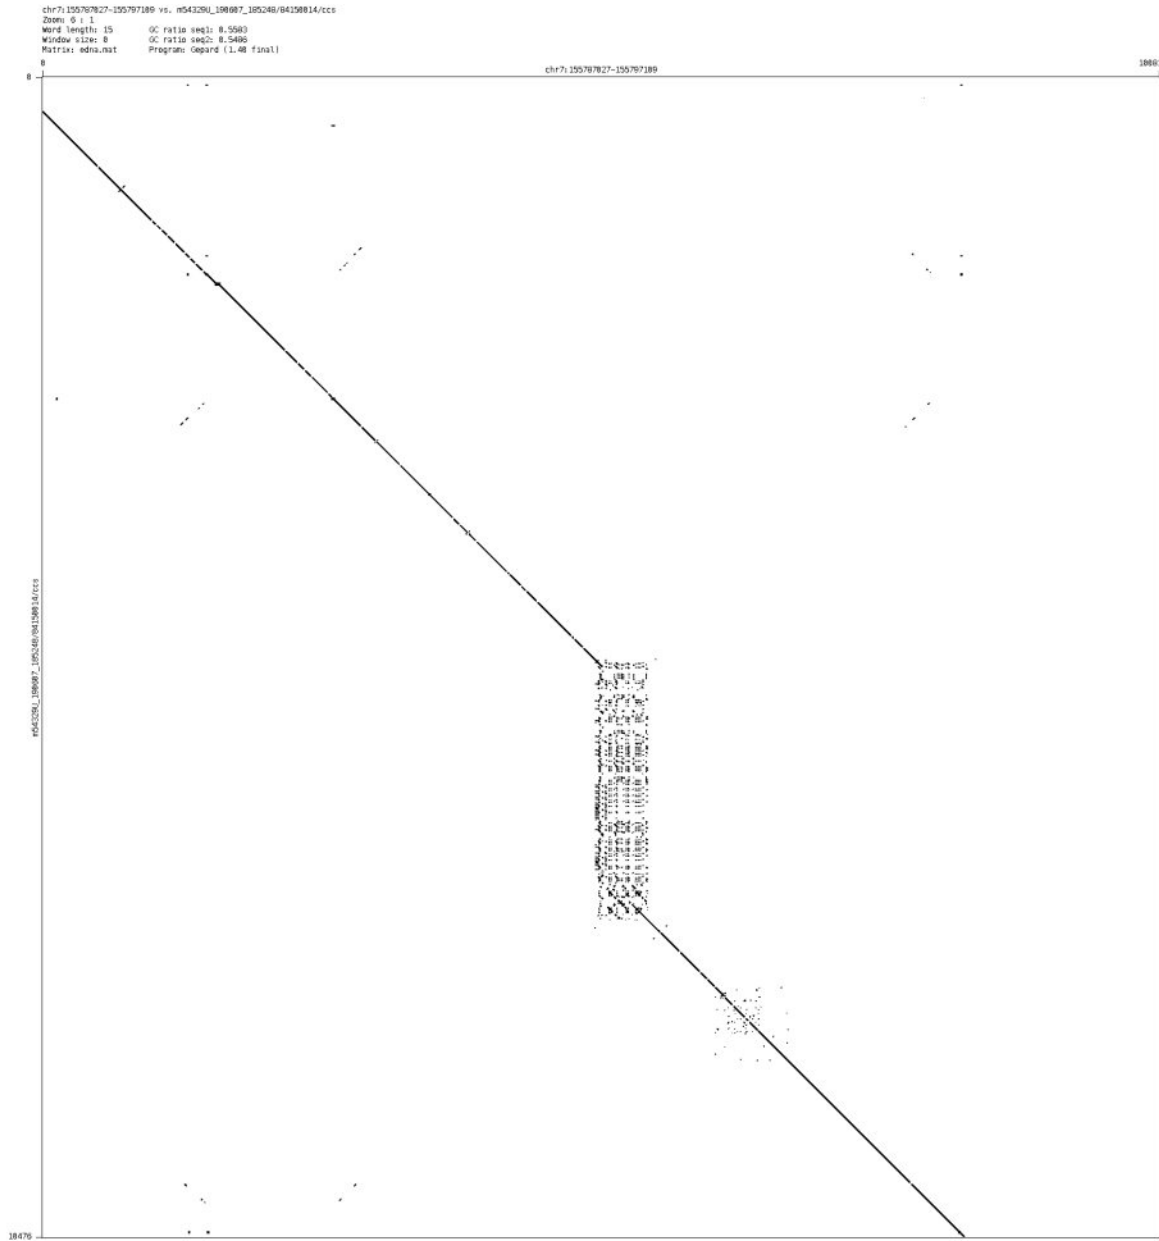

➤ chr7\_158070331\_158071546

chr7:158065331-158070546 vs. m54329U\_198617\_231985/110993202/ccs  
Zoom: 8 : 1  
Word length: 15  
Window size: 0  
Matrix: edna.mat  
OC ratio seq1: 8.5044  
OC ratio seq2: 8.5041  
Program: Gepard (1.48 final)

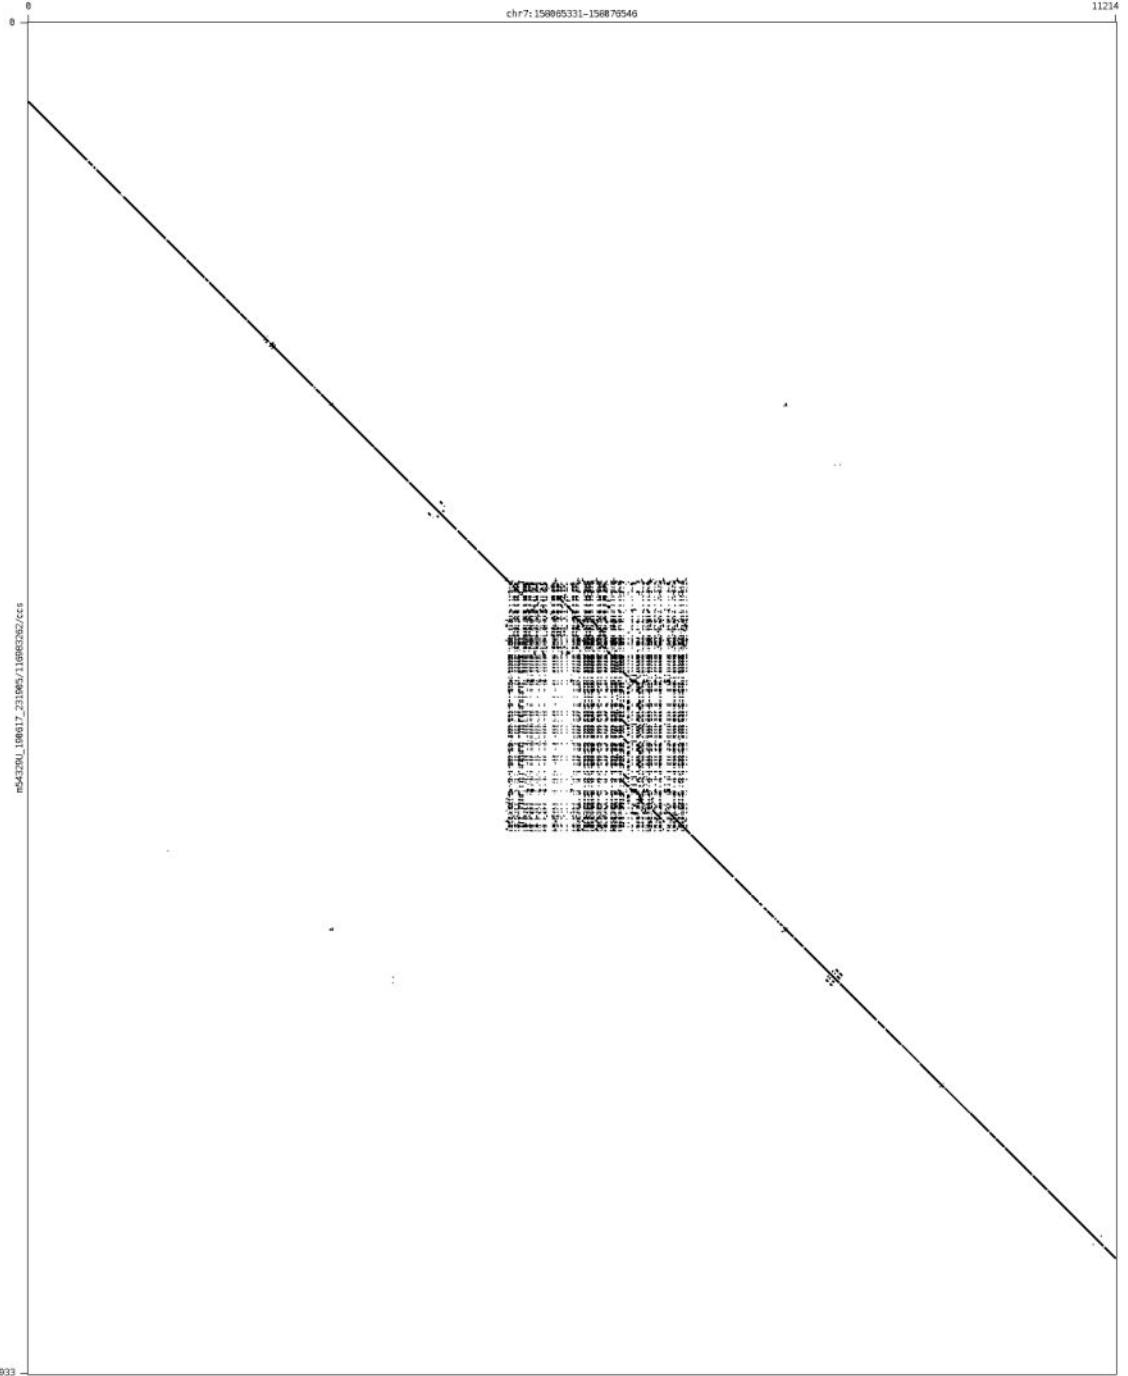

➤ chr7\_158151379\_158151489

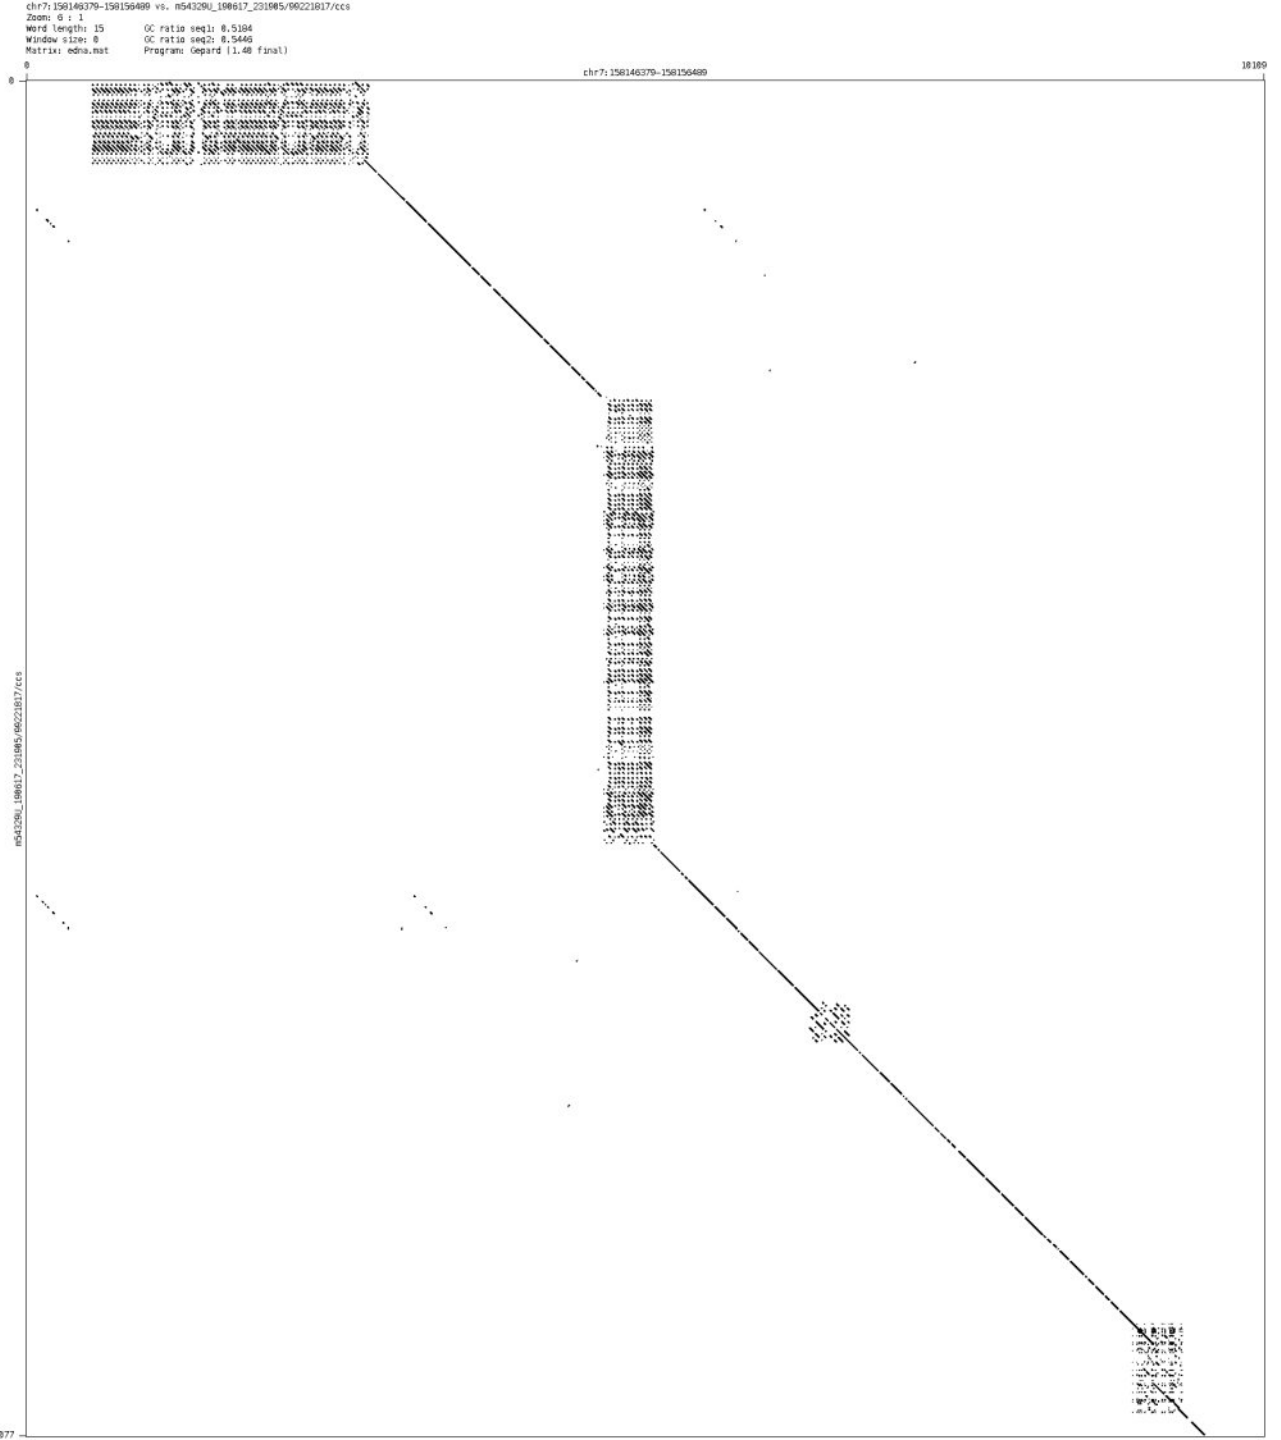

➤ chr7\_158166484\_158166596

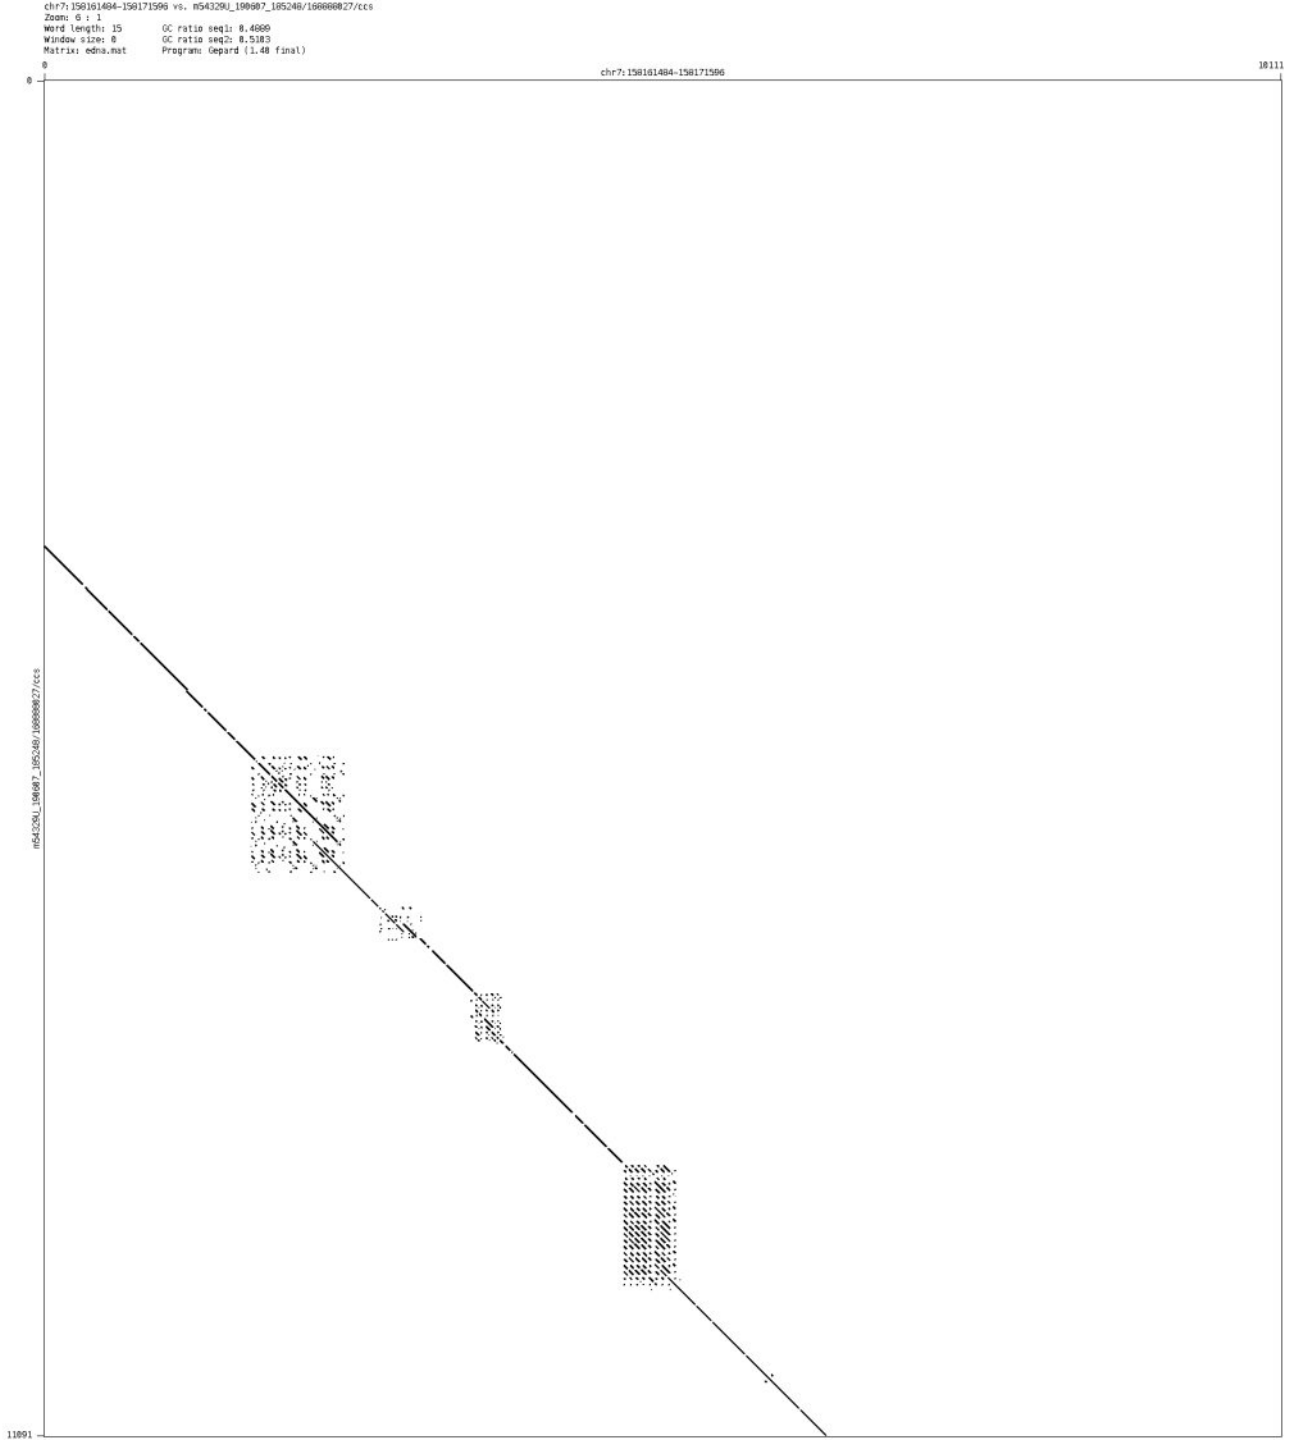

➤ chr7\_158273882\_158274358

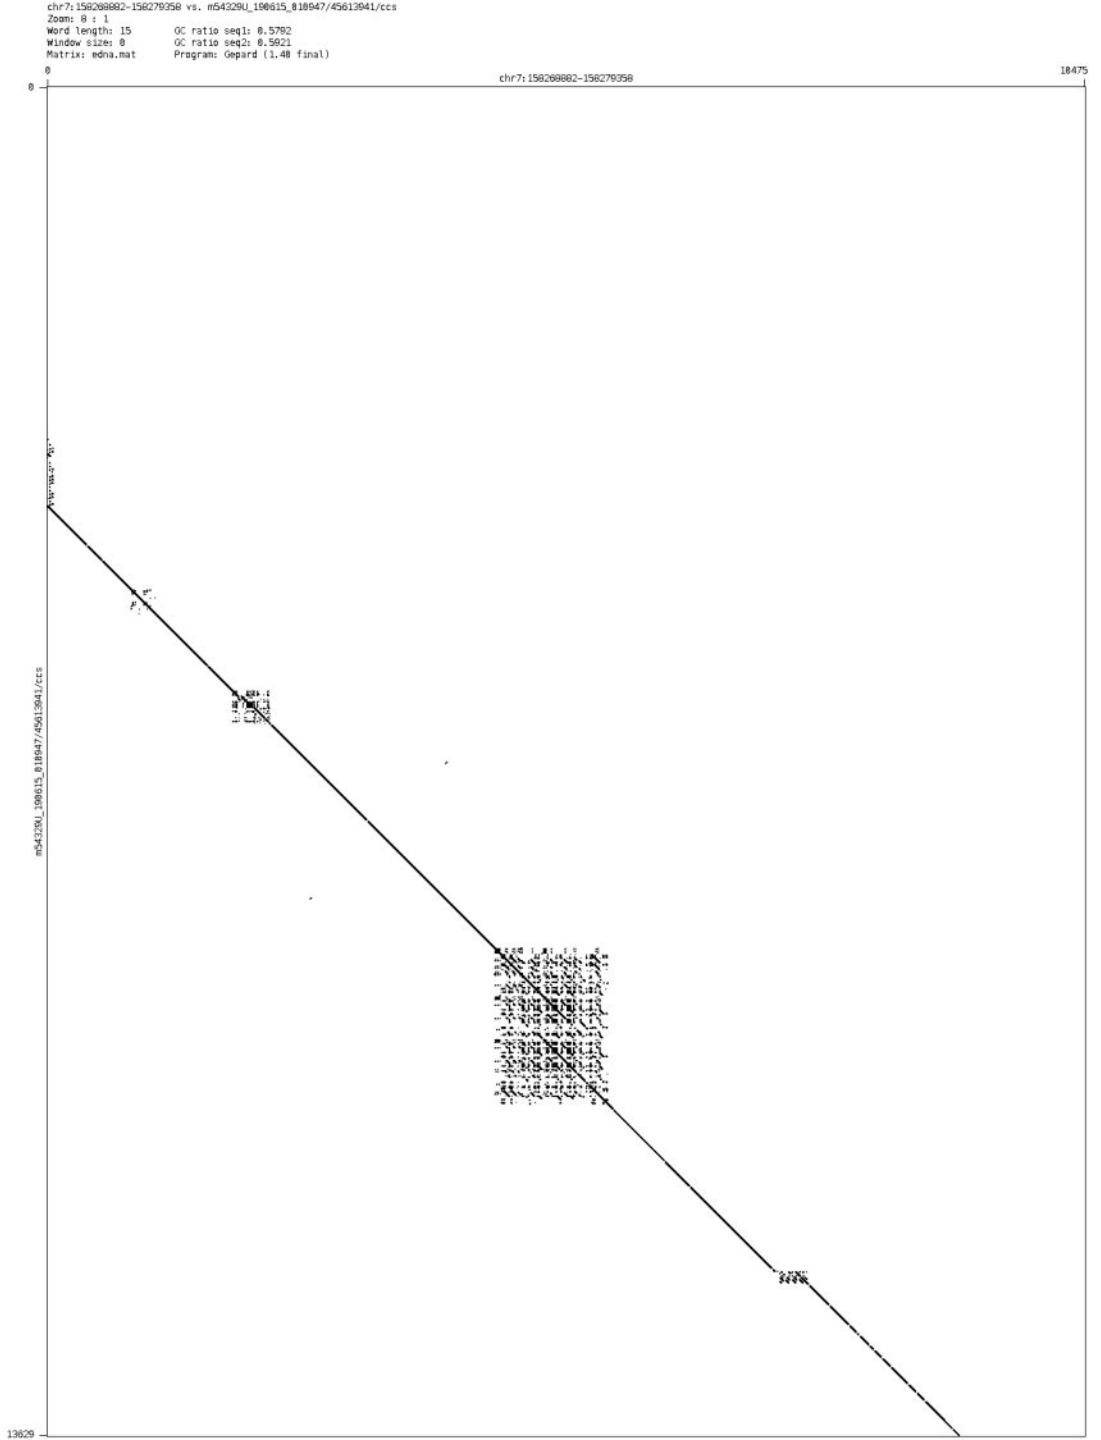

➤ chr7\_158668126\_158668212

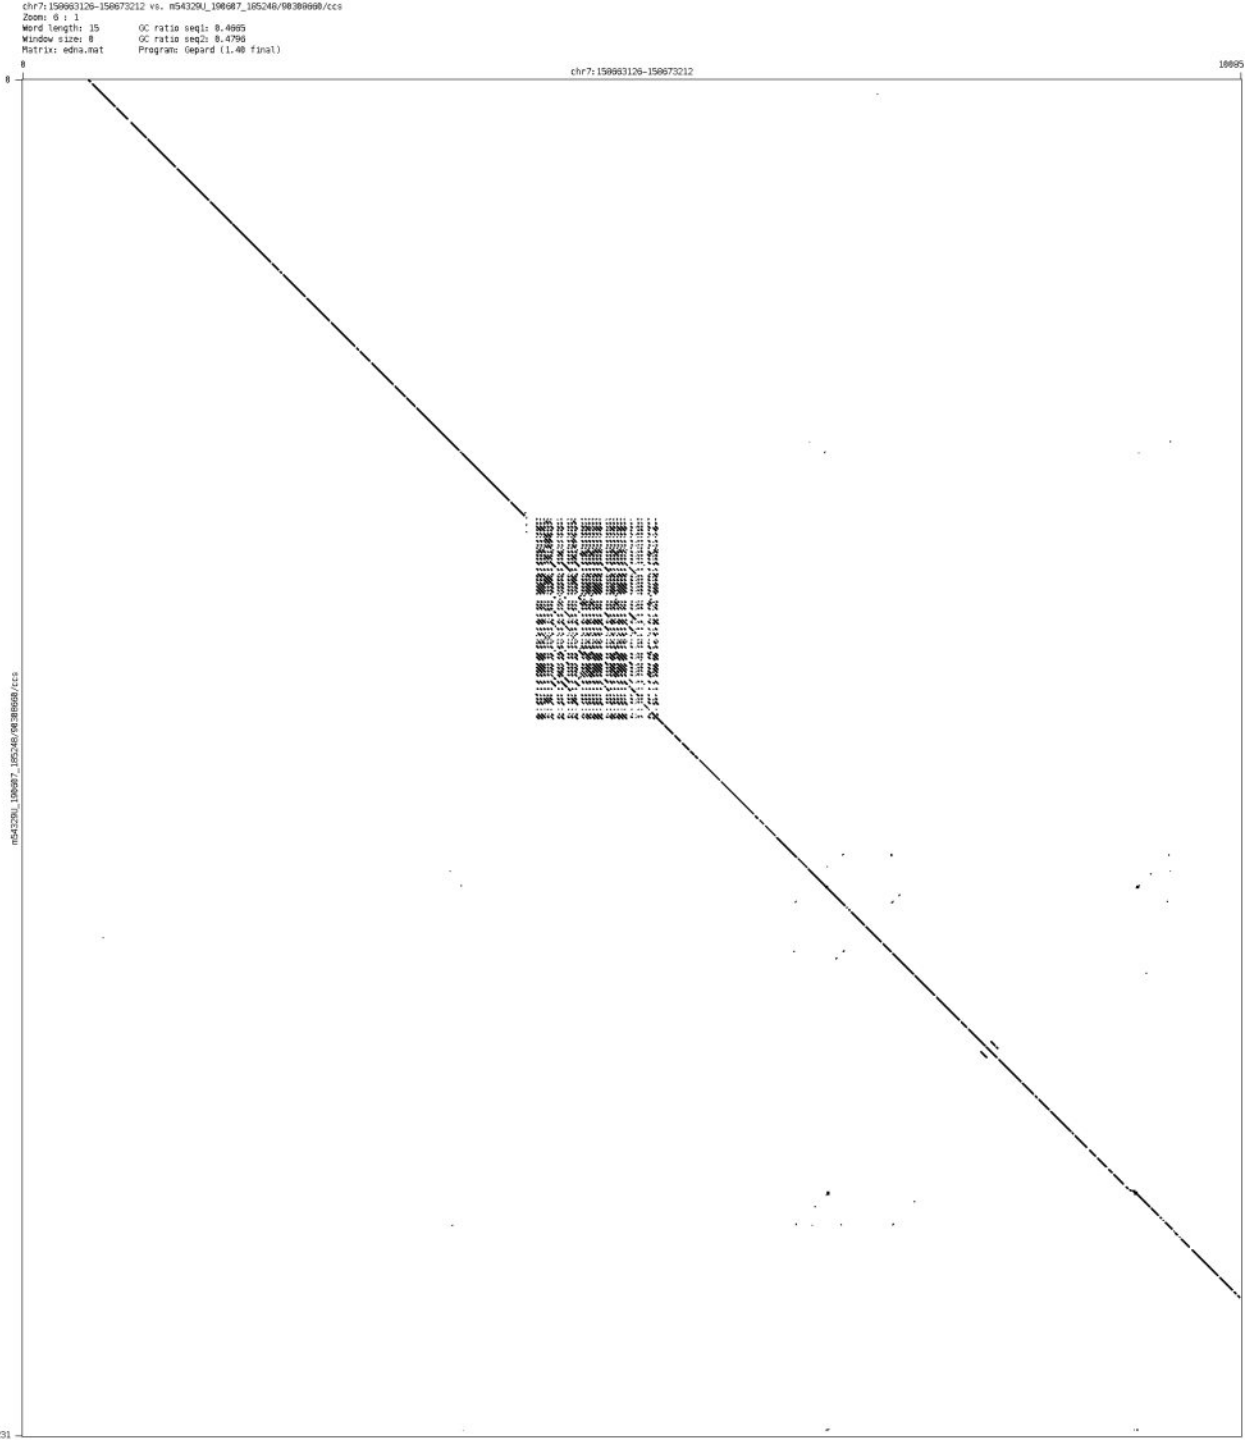

➤ chr7\_158998436\_158998524

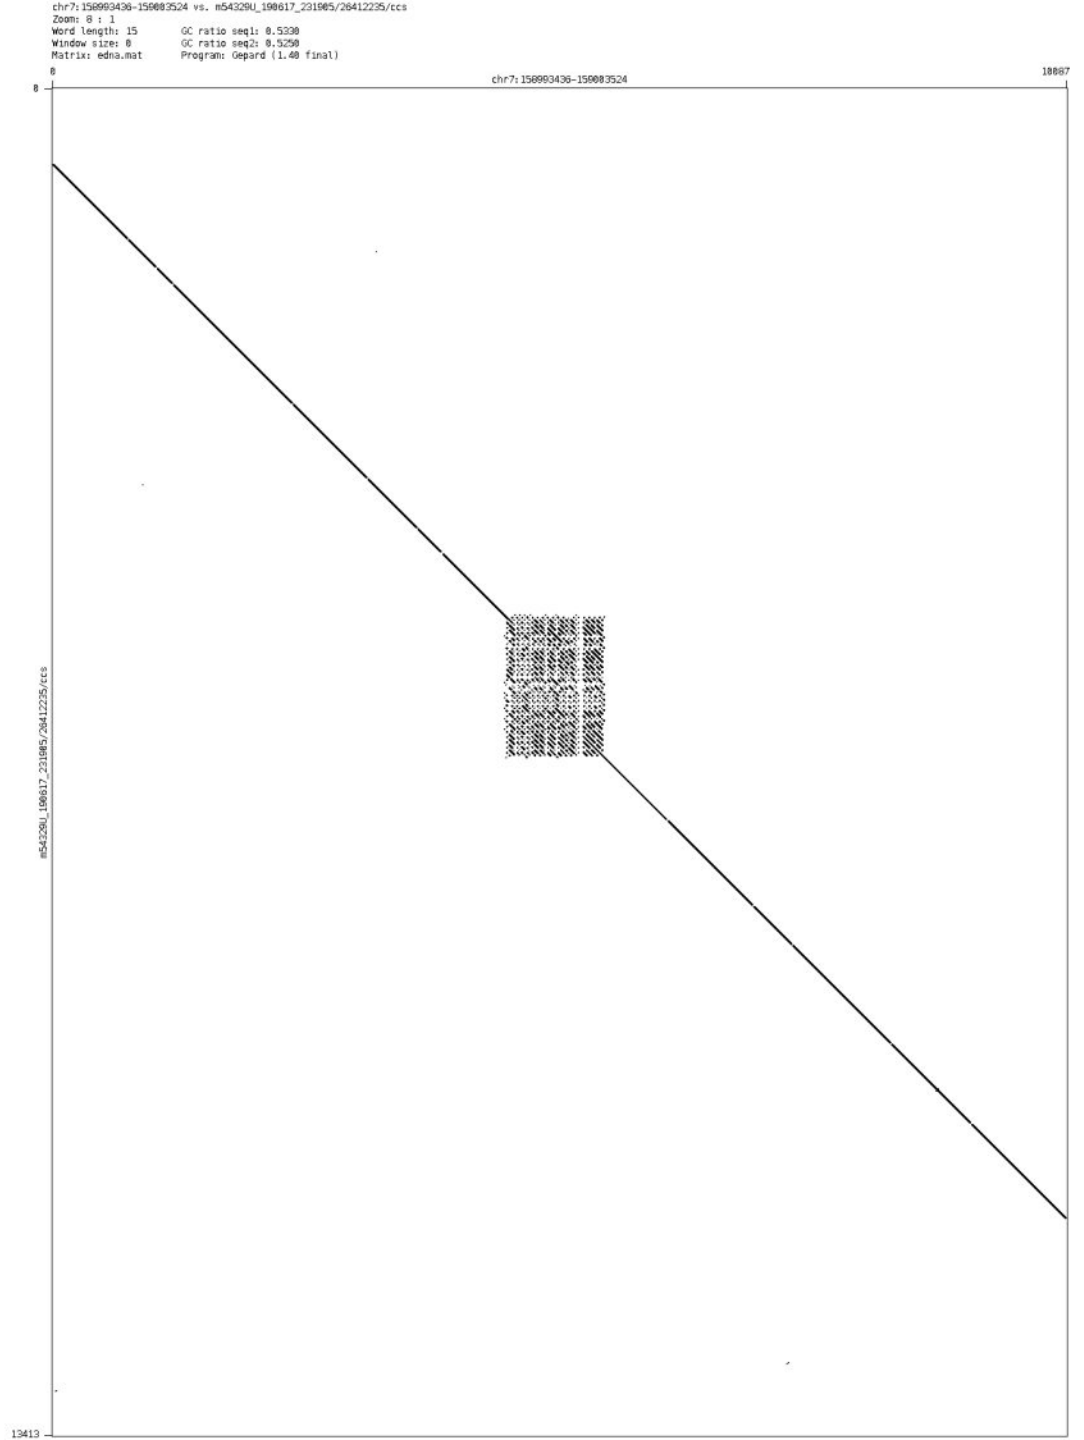

➤ chr8\_1164182\_1164270

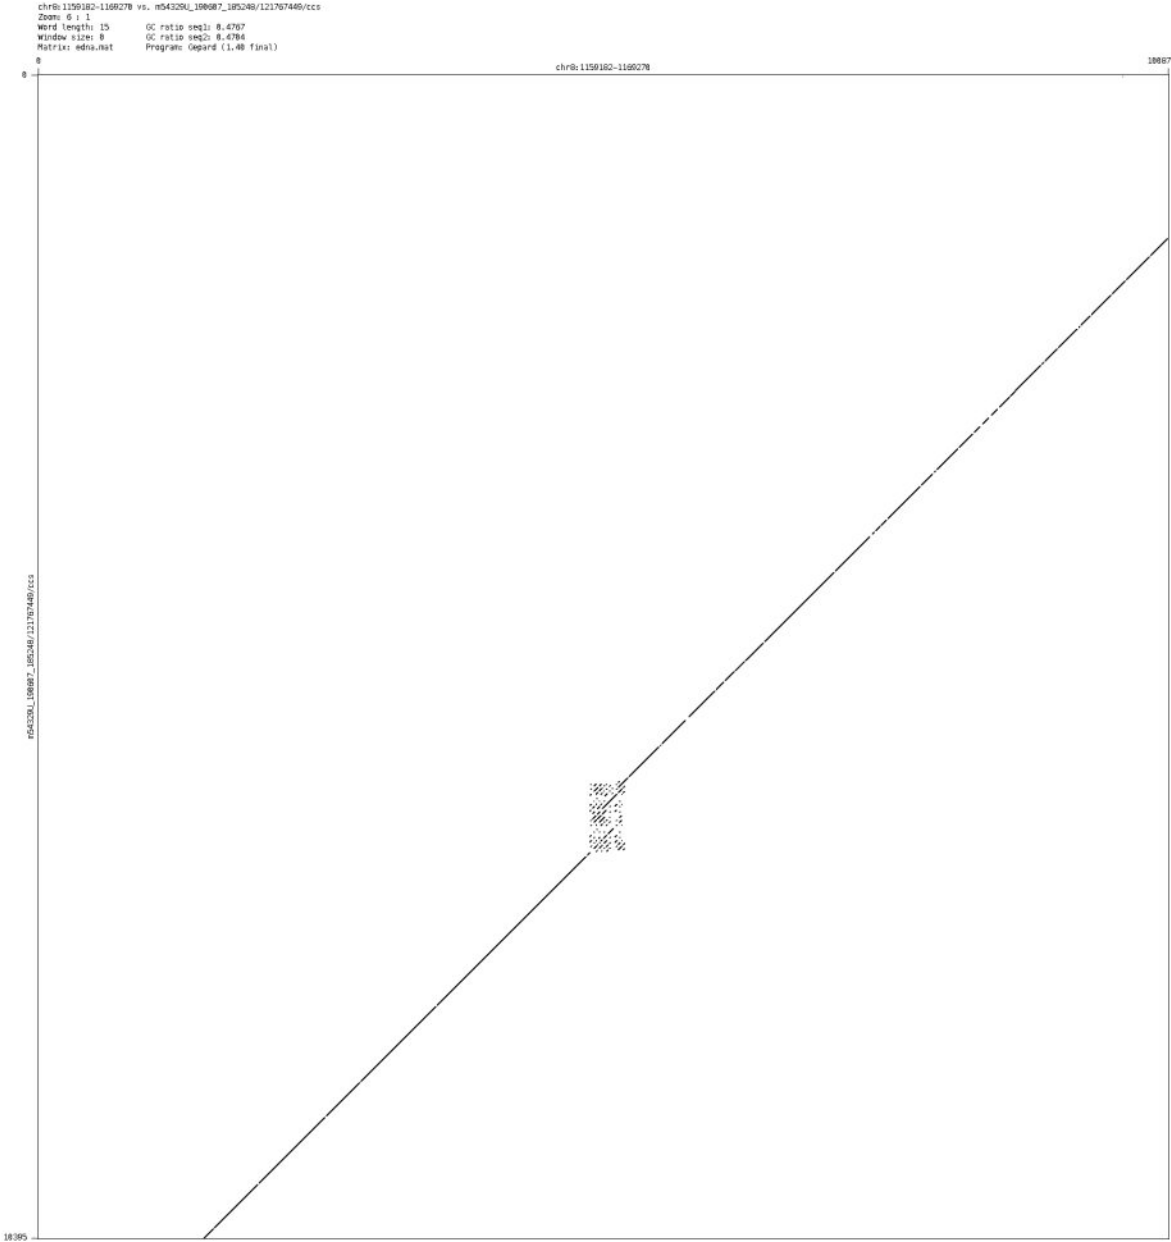



➤ chr8\_11456240\_11456367

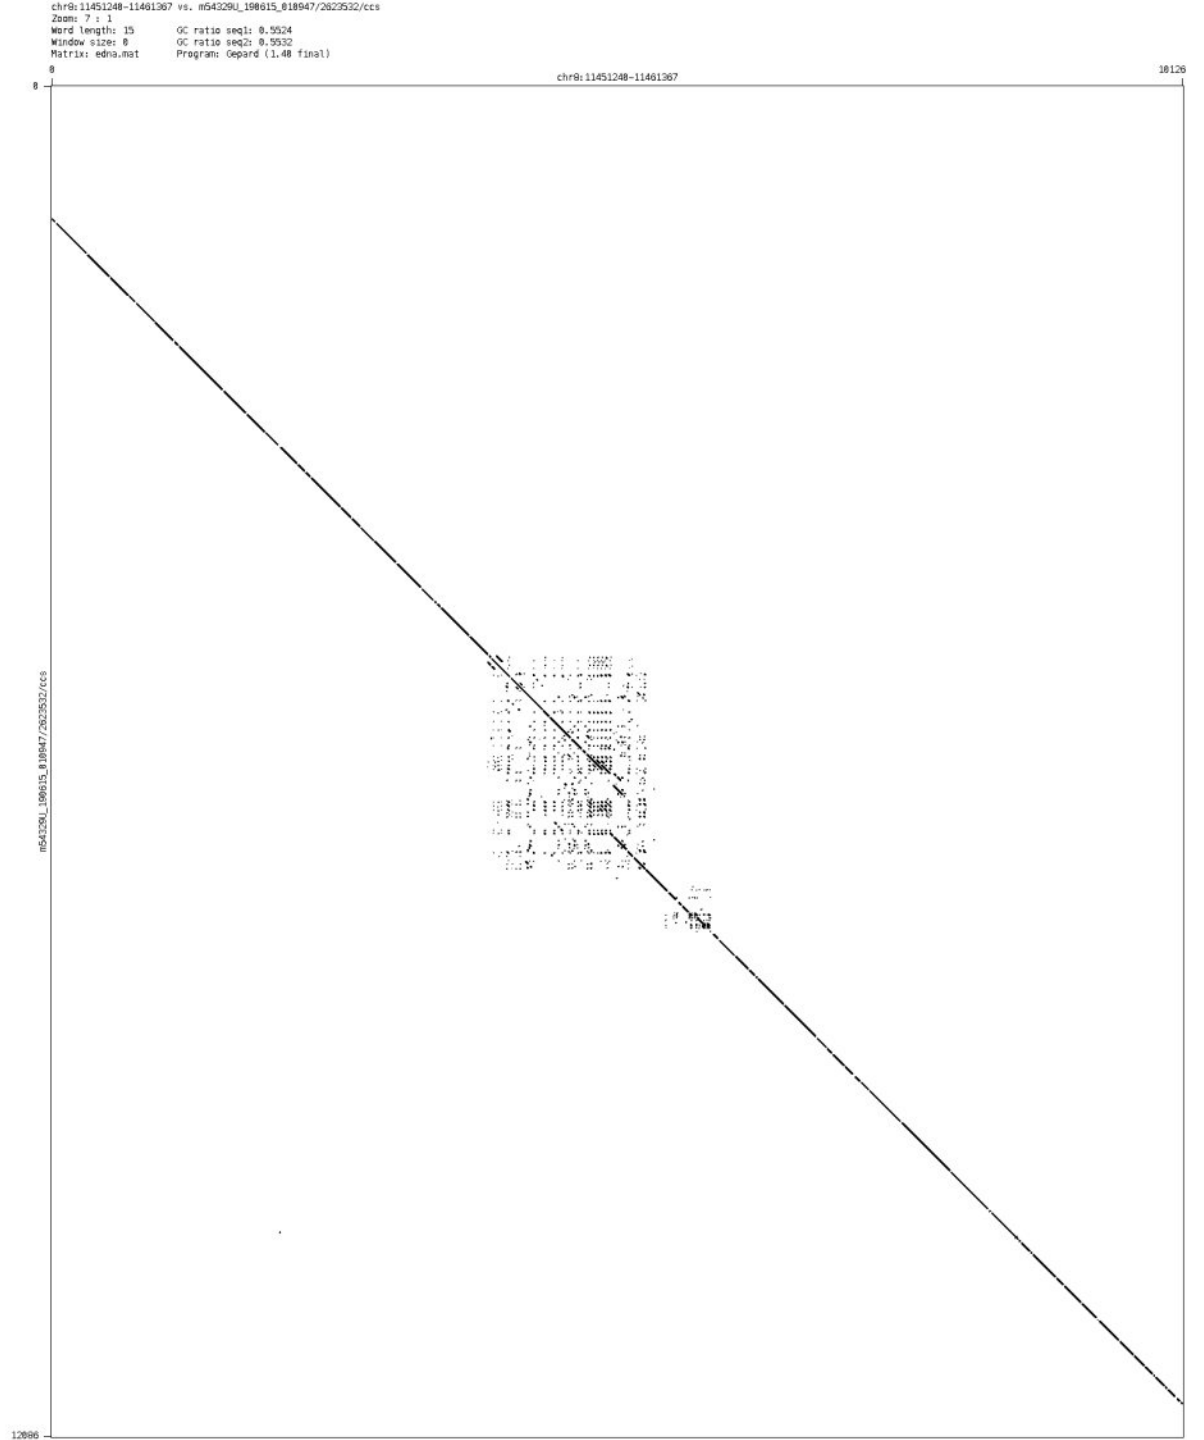

➤ chr8\_37506281\_37506358

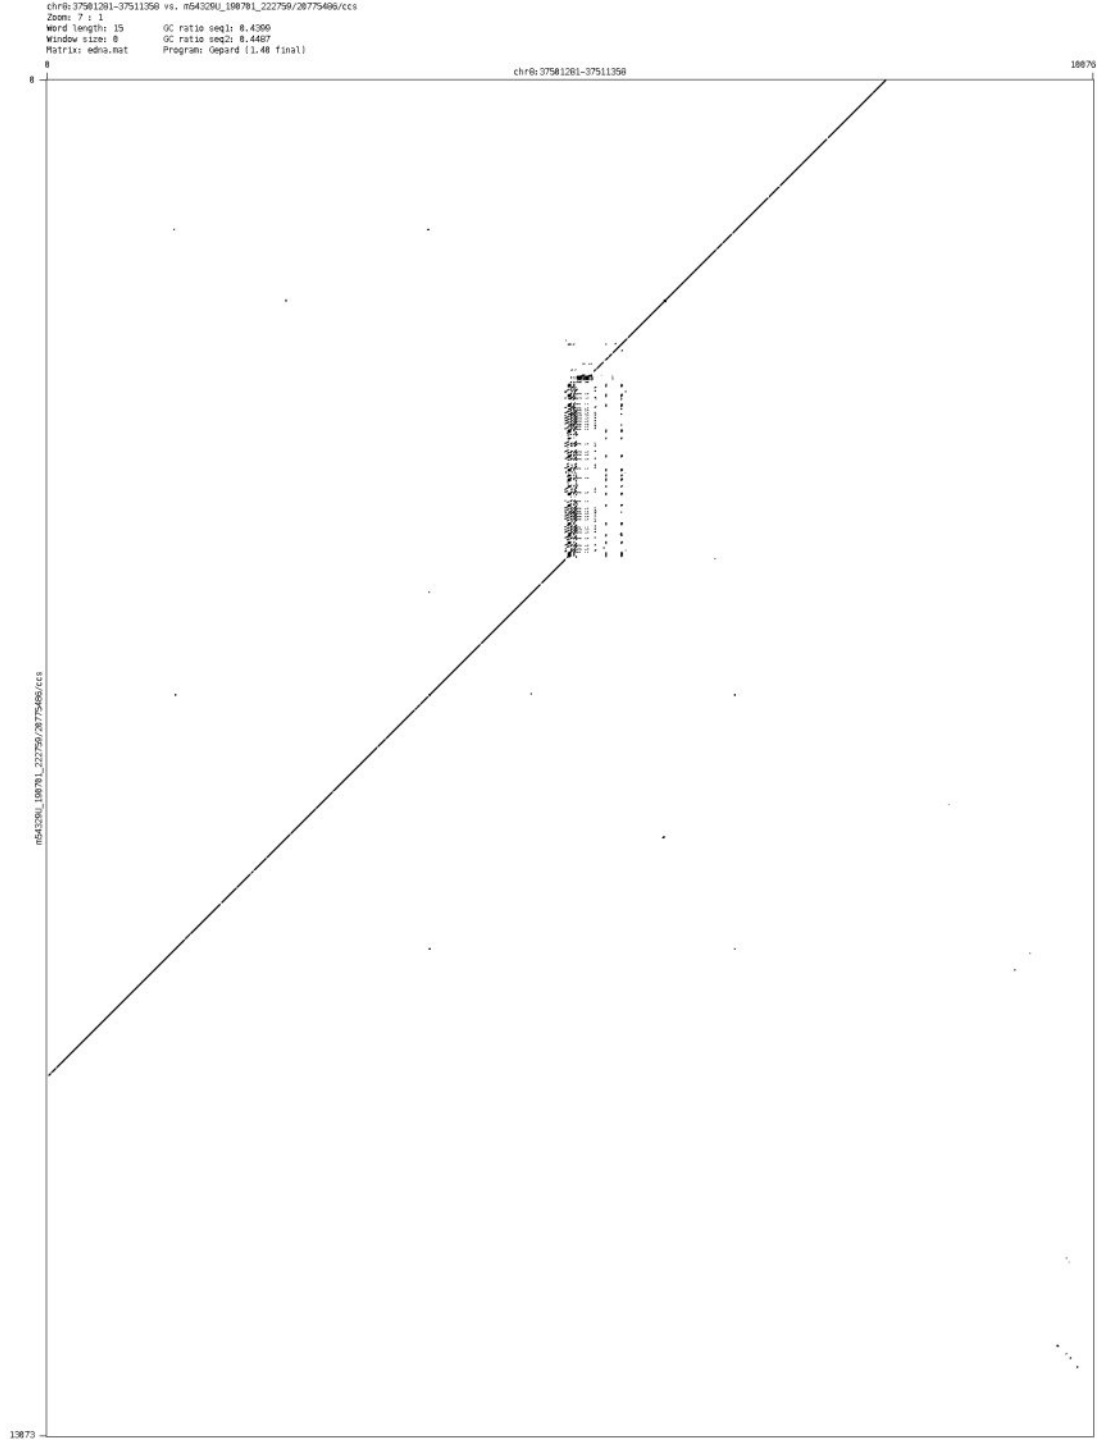

➤ chr8\_68906235\_68906443

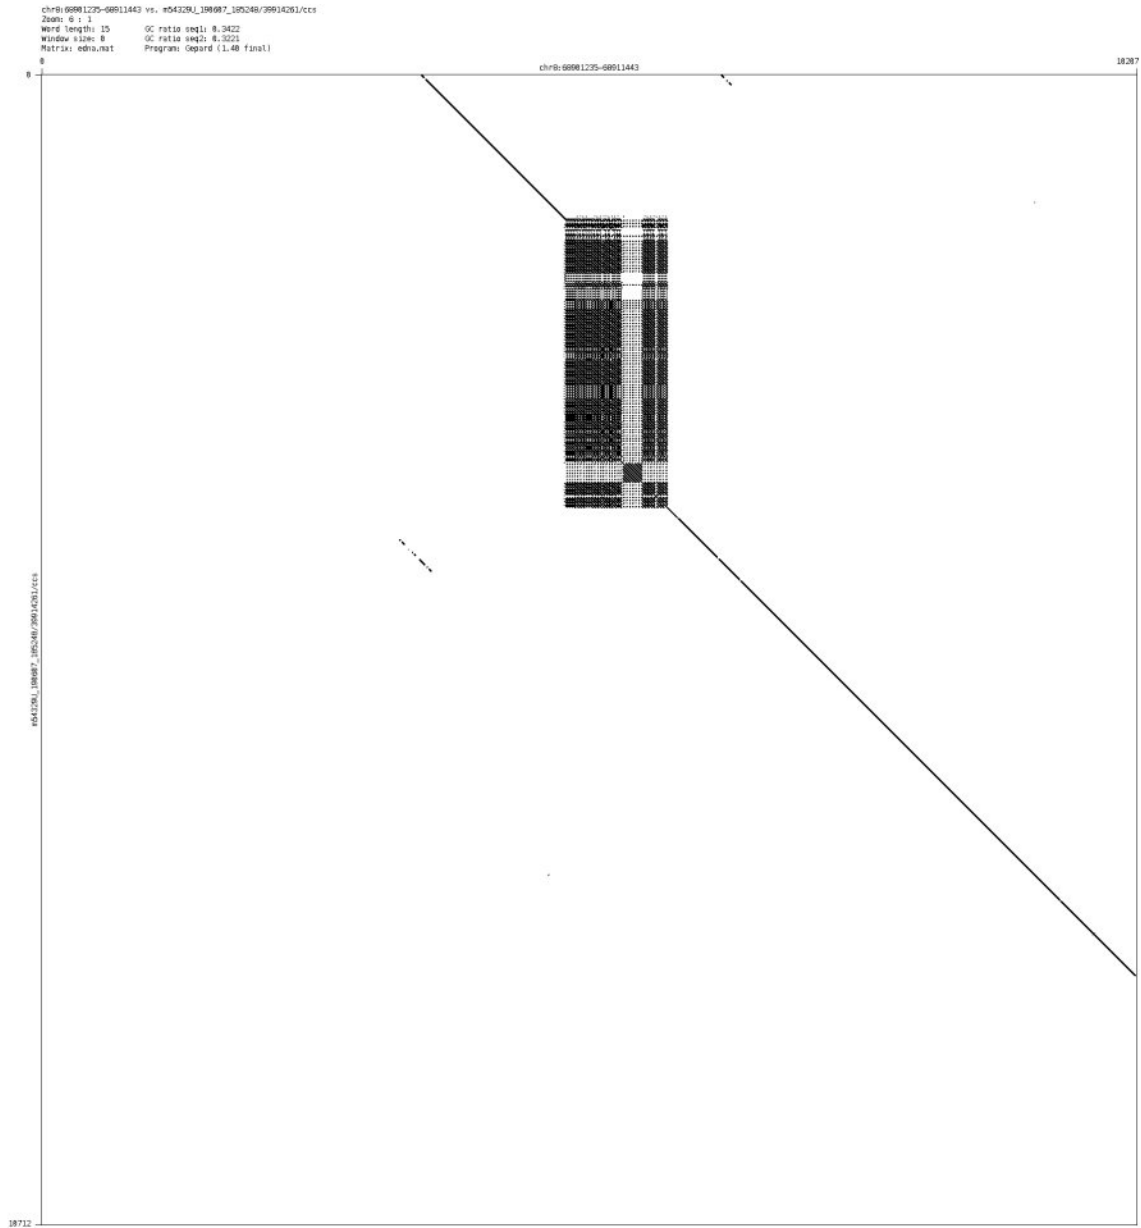

➤ chr8\_76444618\_76444671

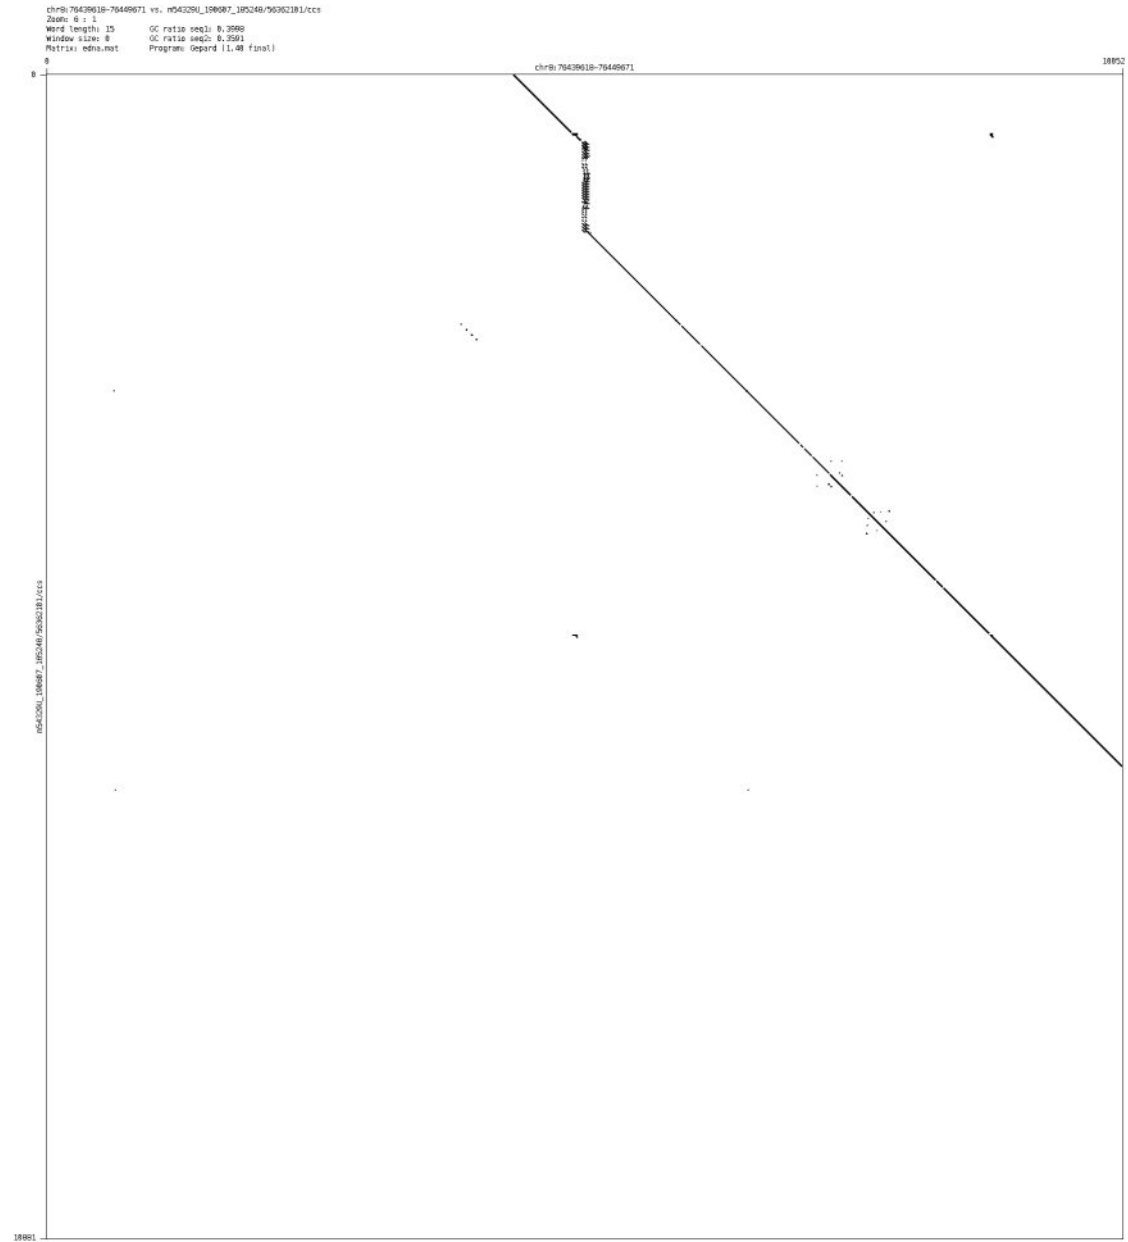

➤ chr8\_92178203\_92183376

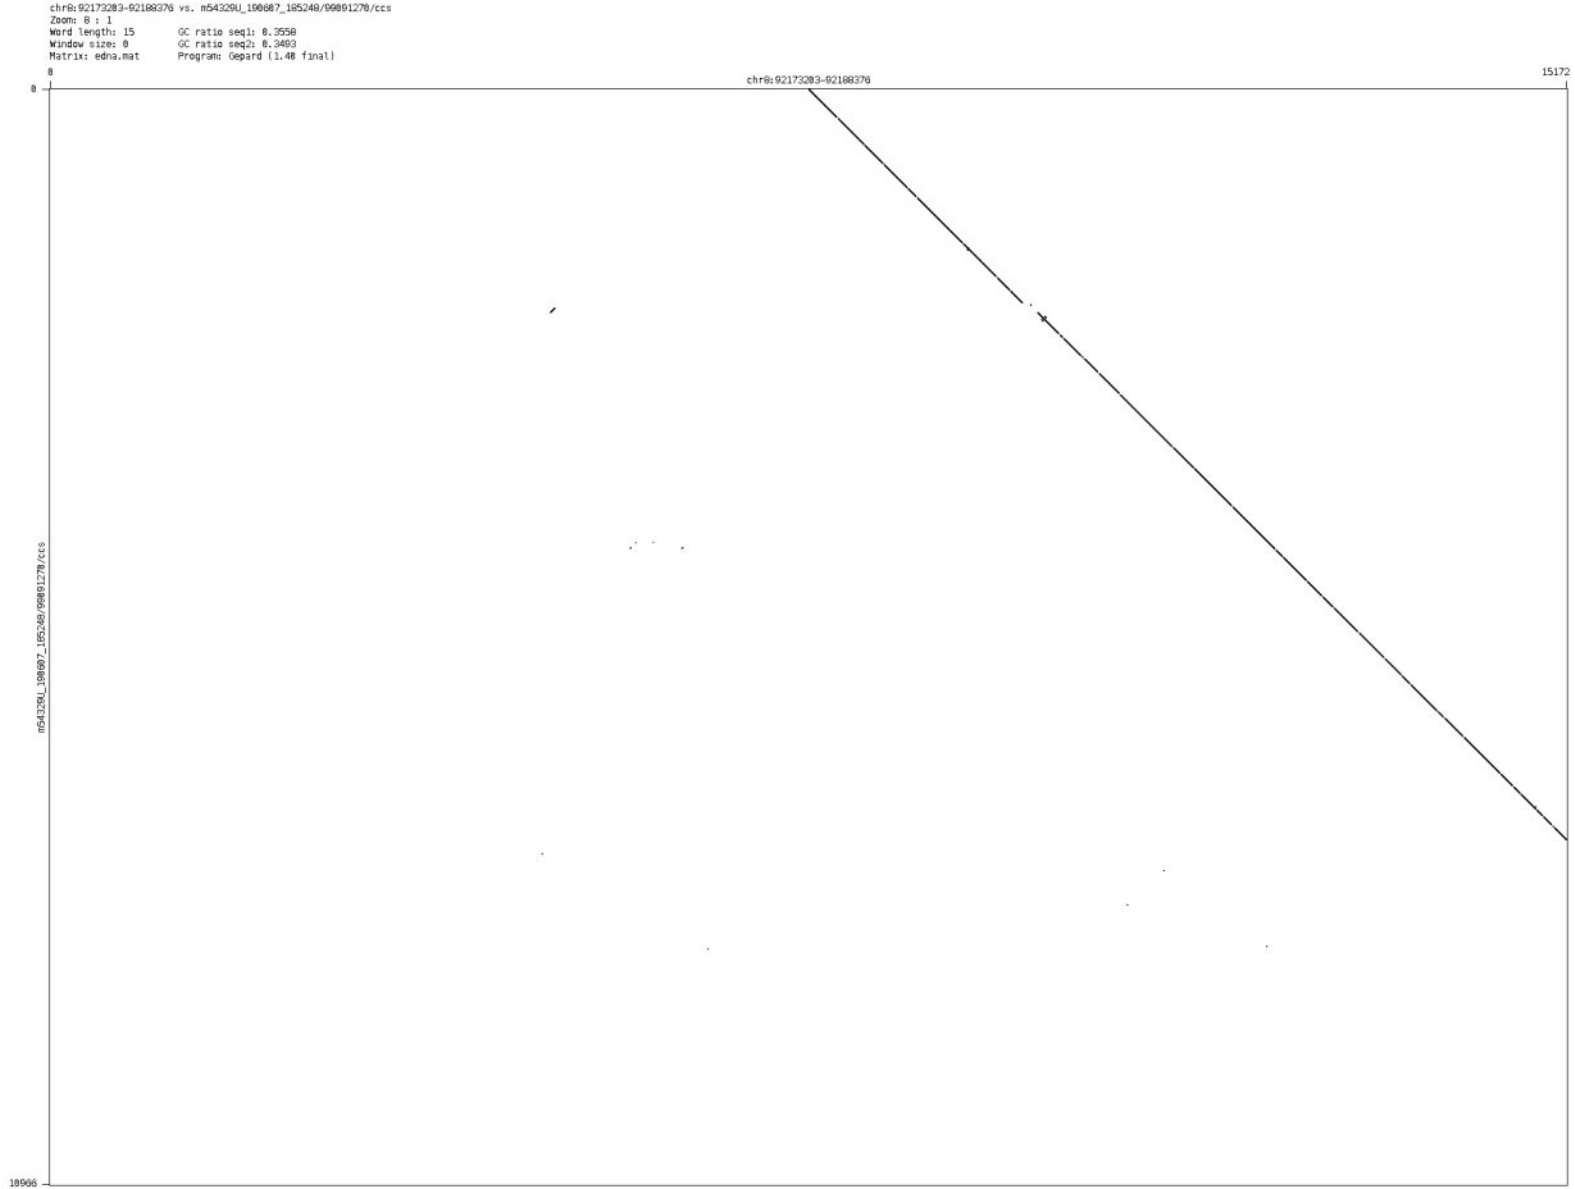

➤ chr8\_100426632\_100426724

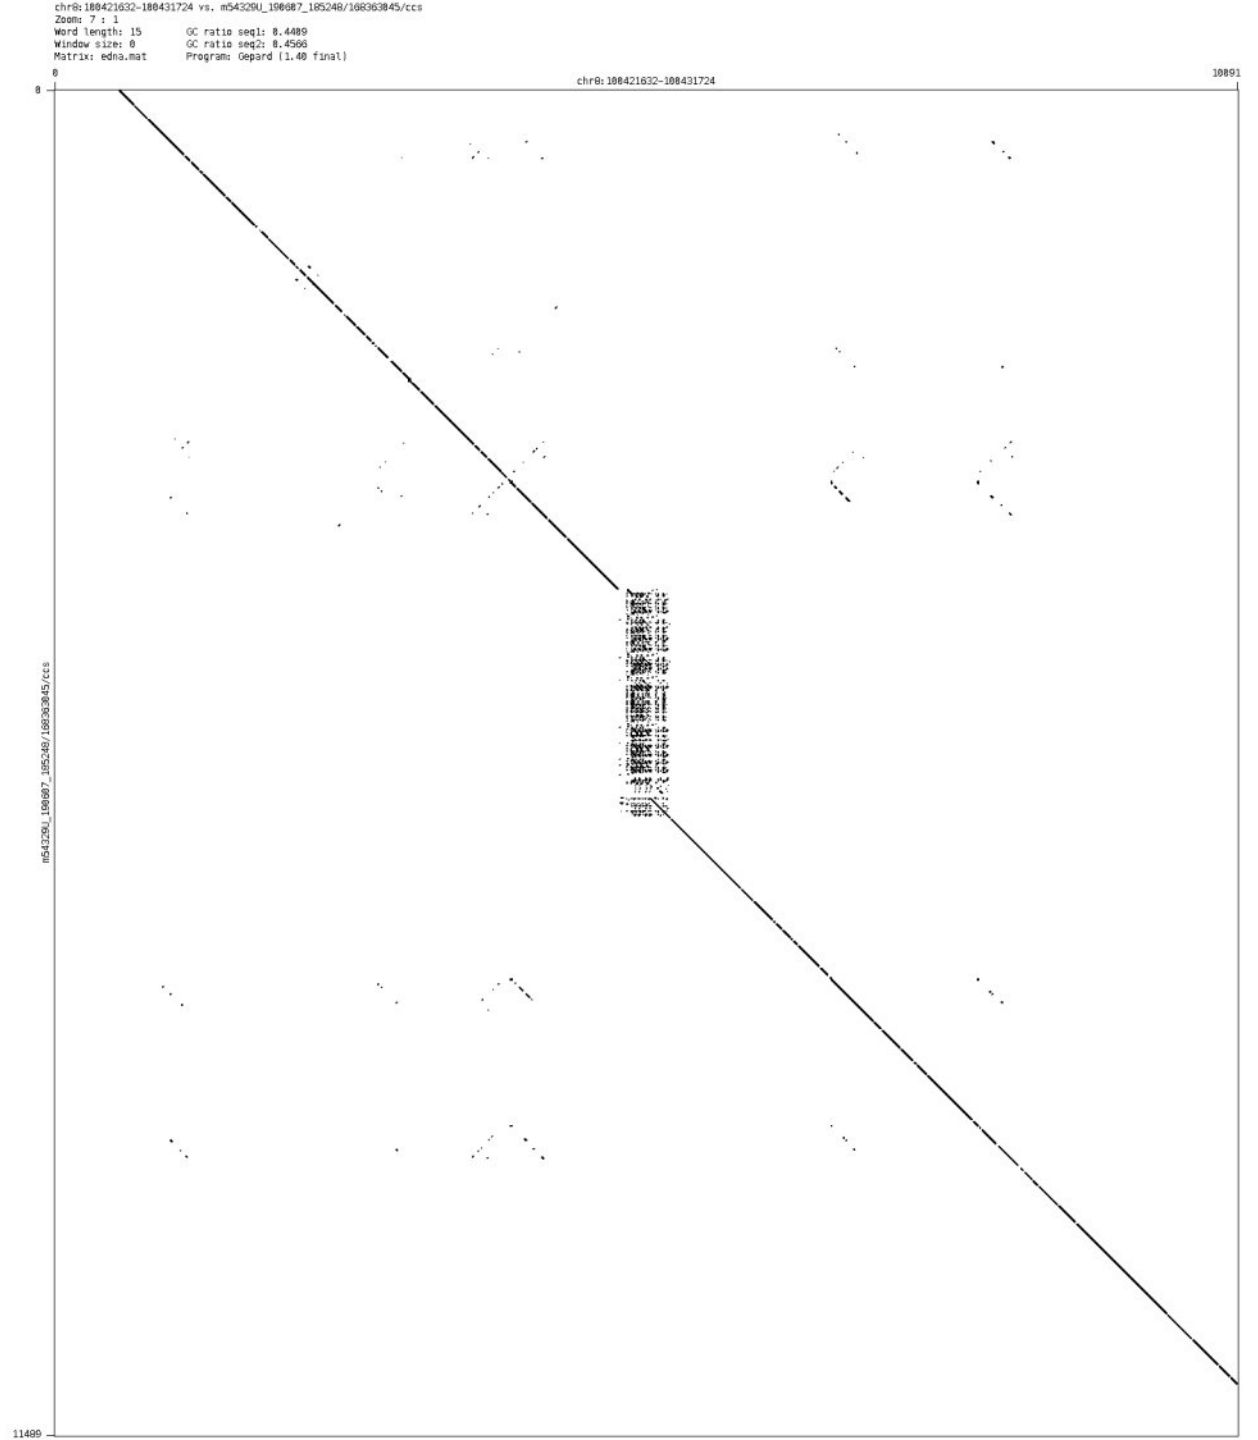

➤ chr8\_138206296\_138206471

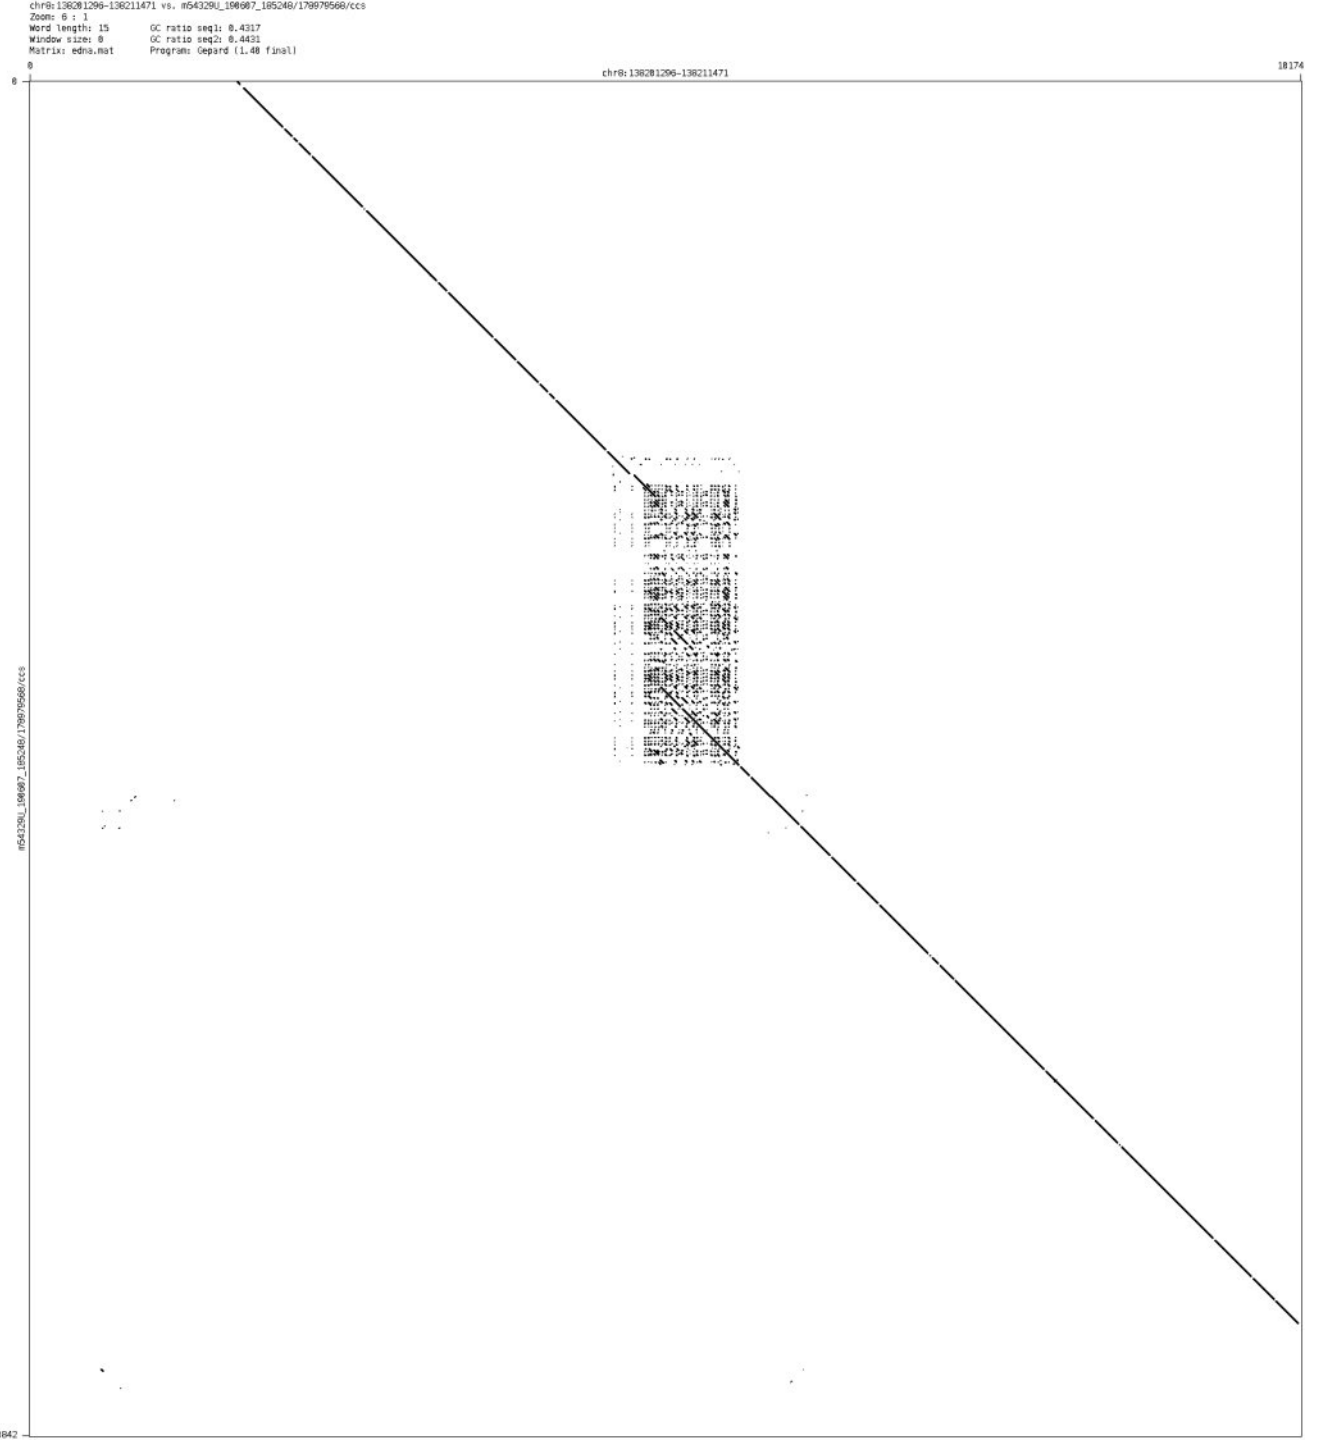

➤ chr8\_138691548\_138692228

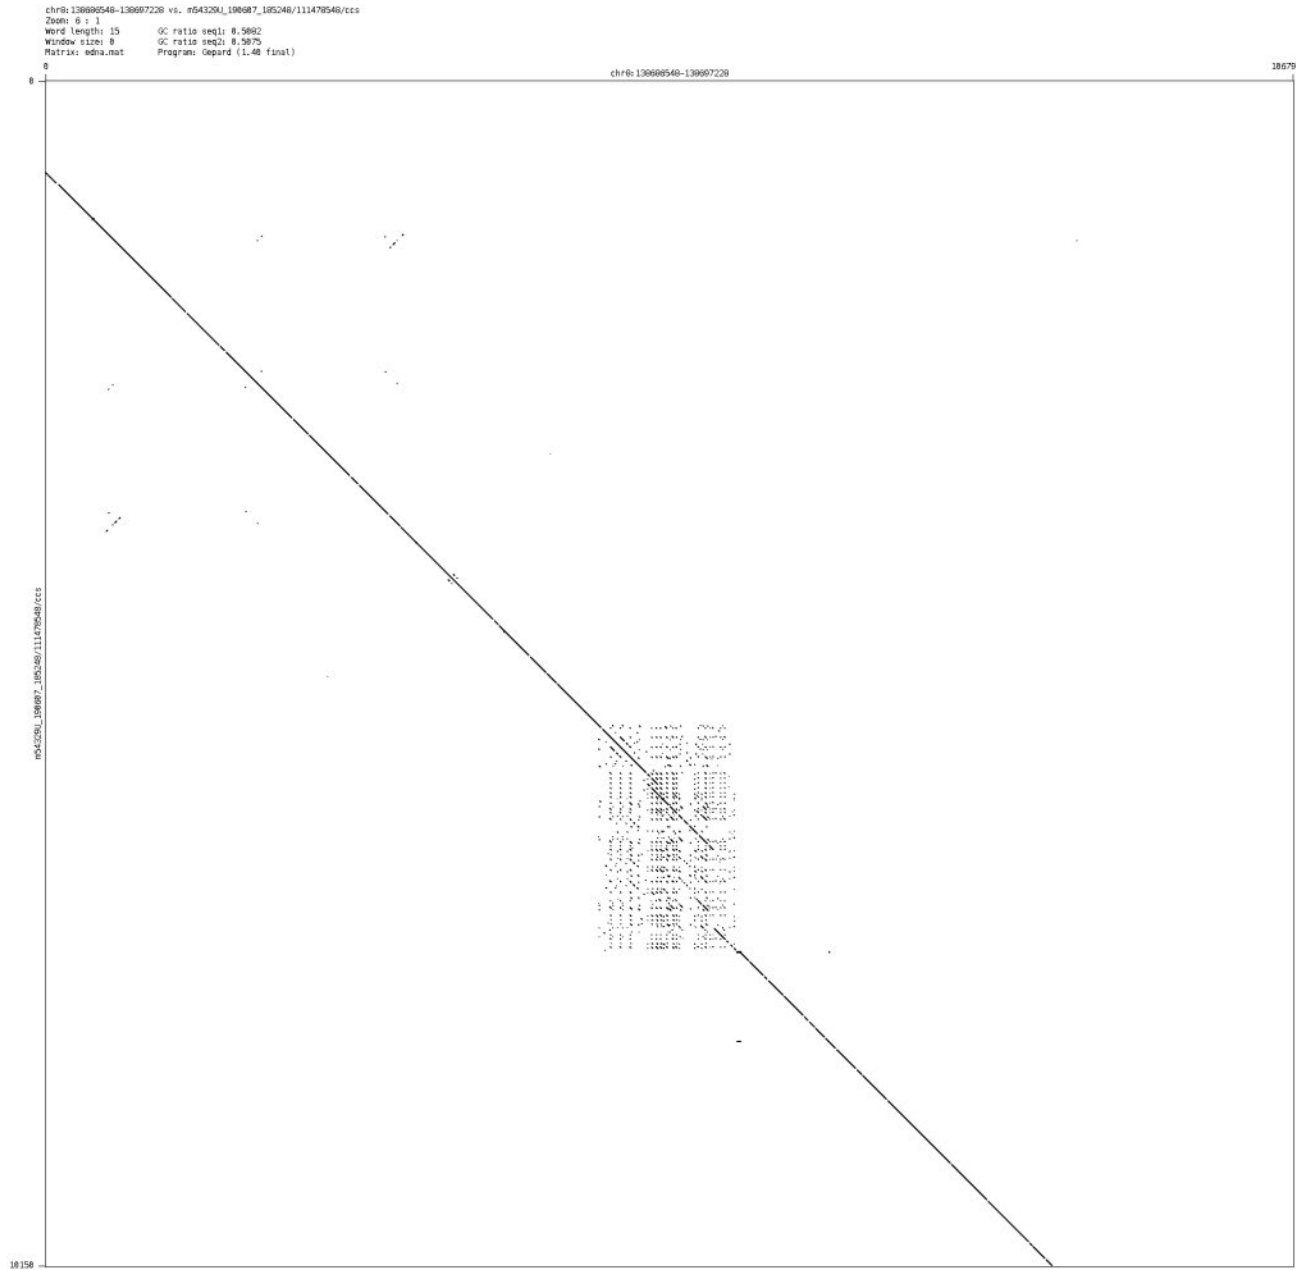



➤ chr8\_141492292\_141492474

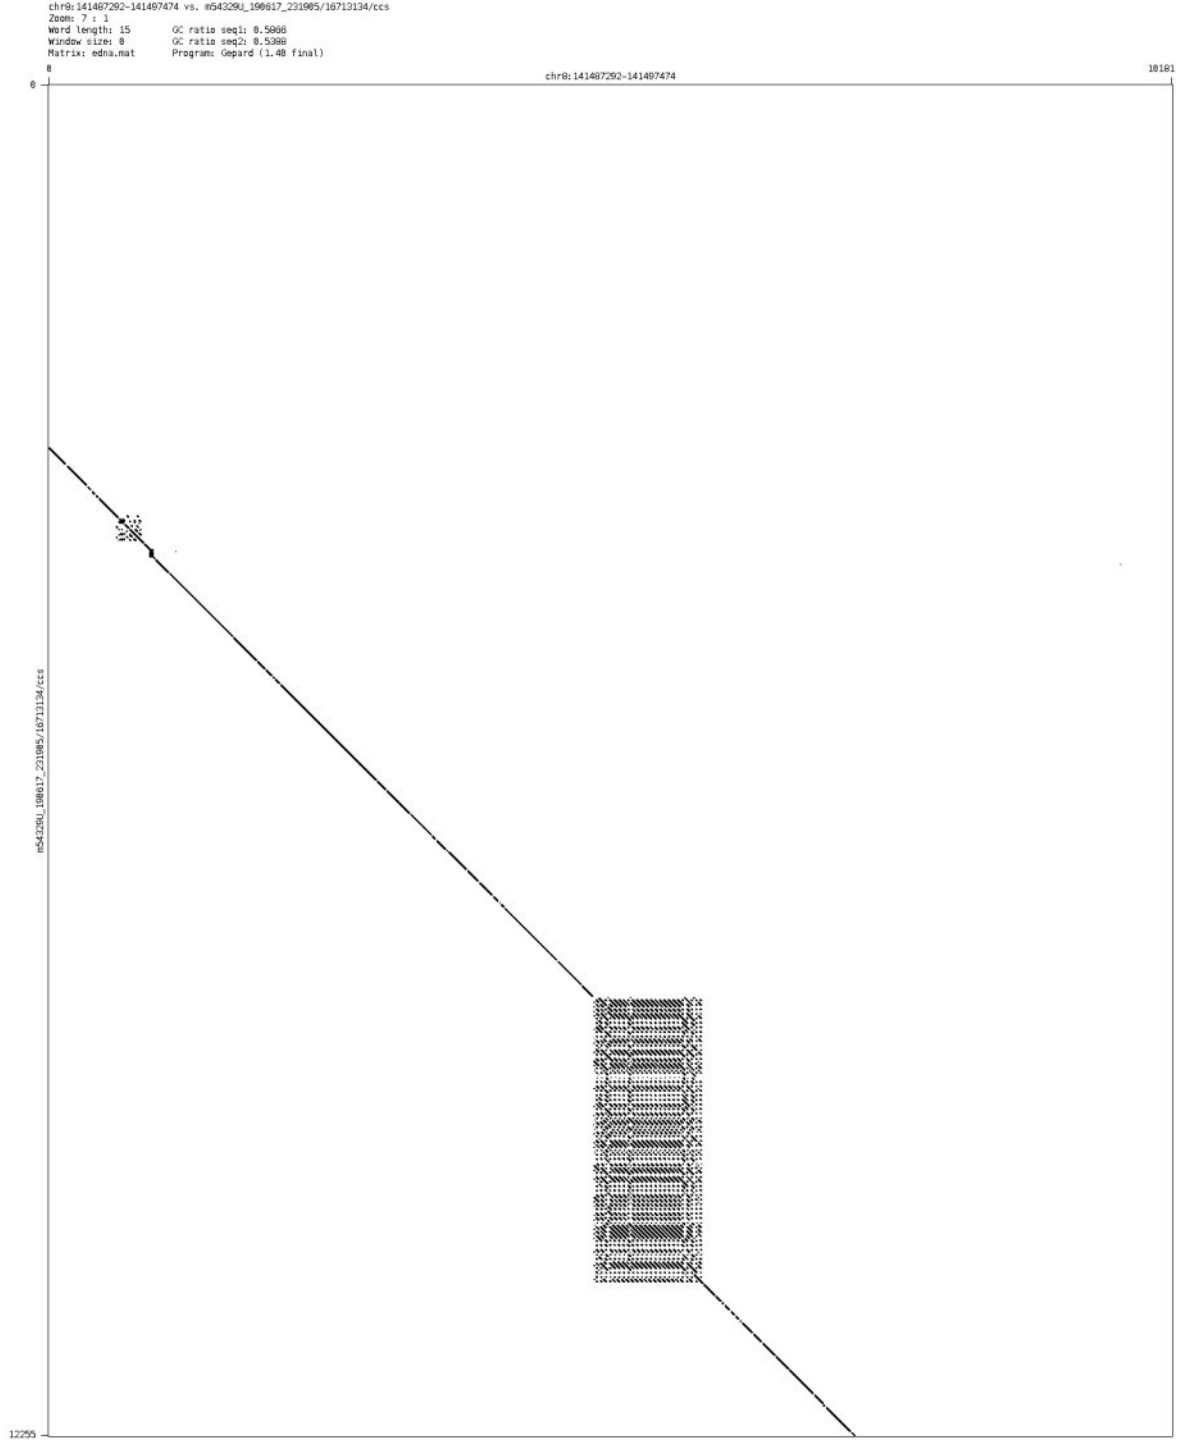

➤ chr8\_141871771\_141874394

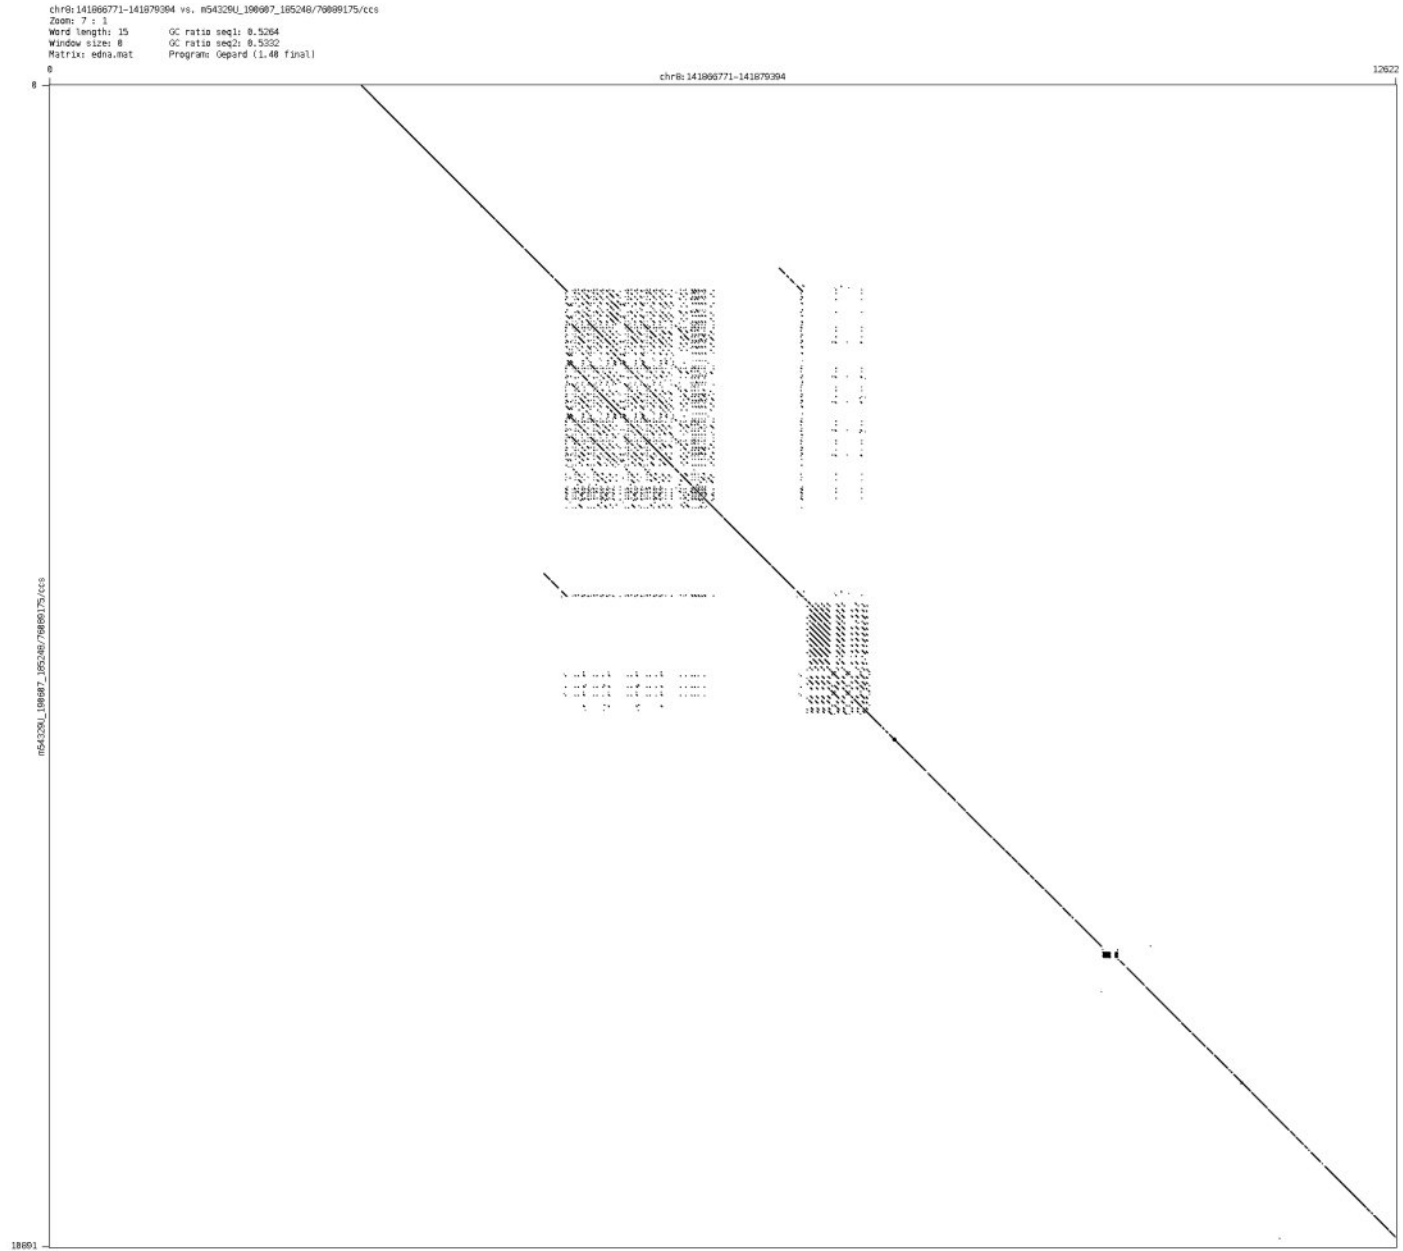

➤ chr8\_142012915\_142013093

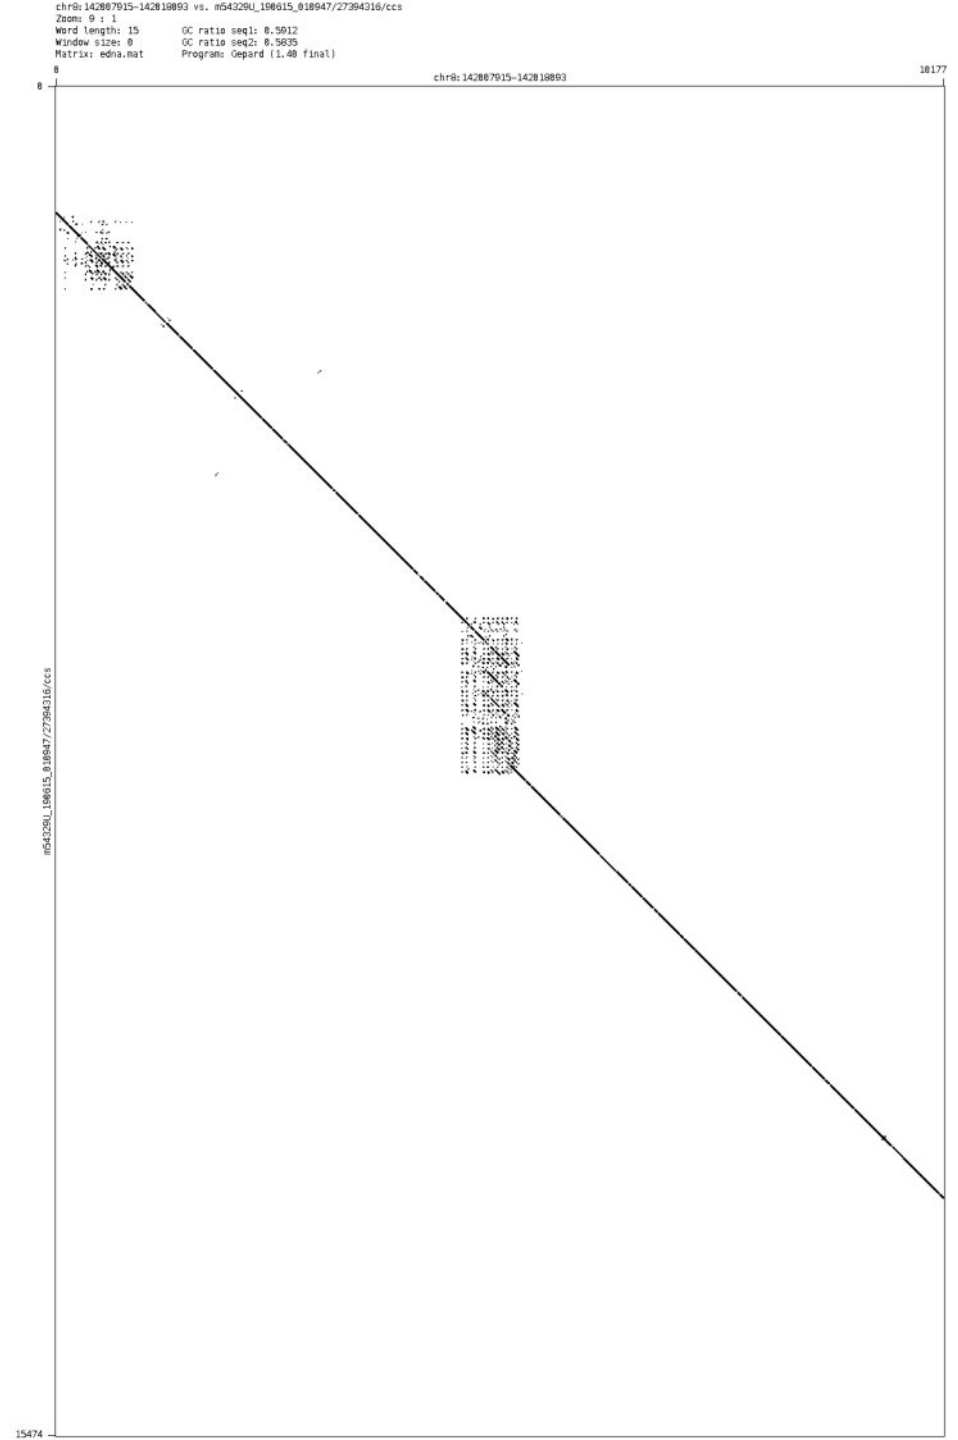

➤ chr8\_143218262\_143218337

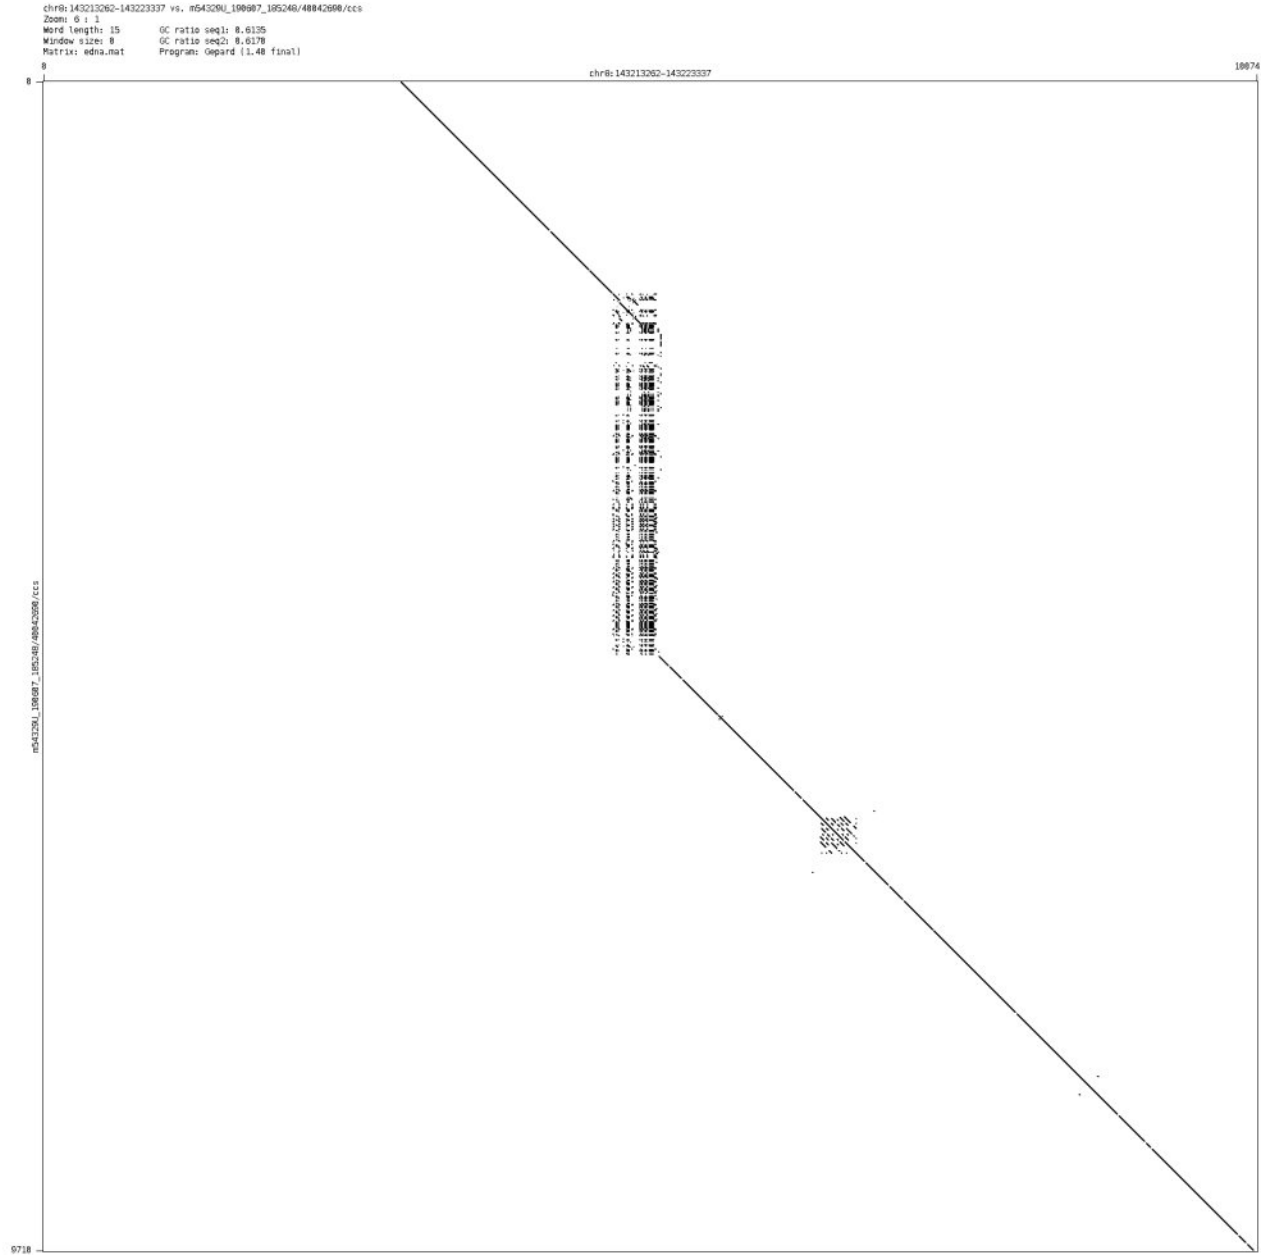

➤ chr8\_143669463\_143669602

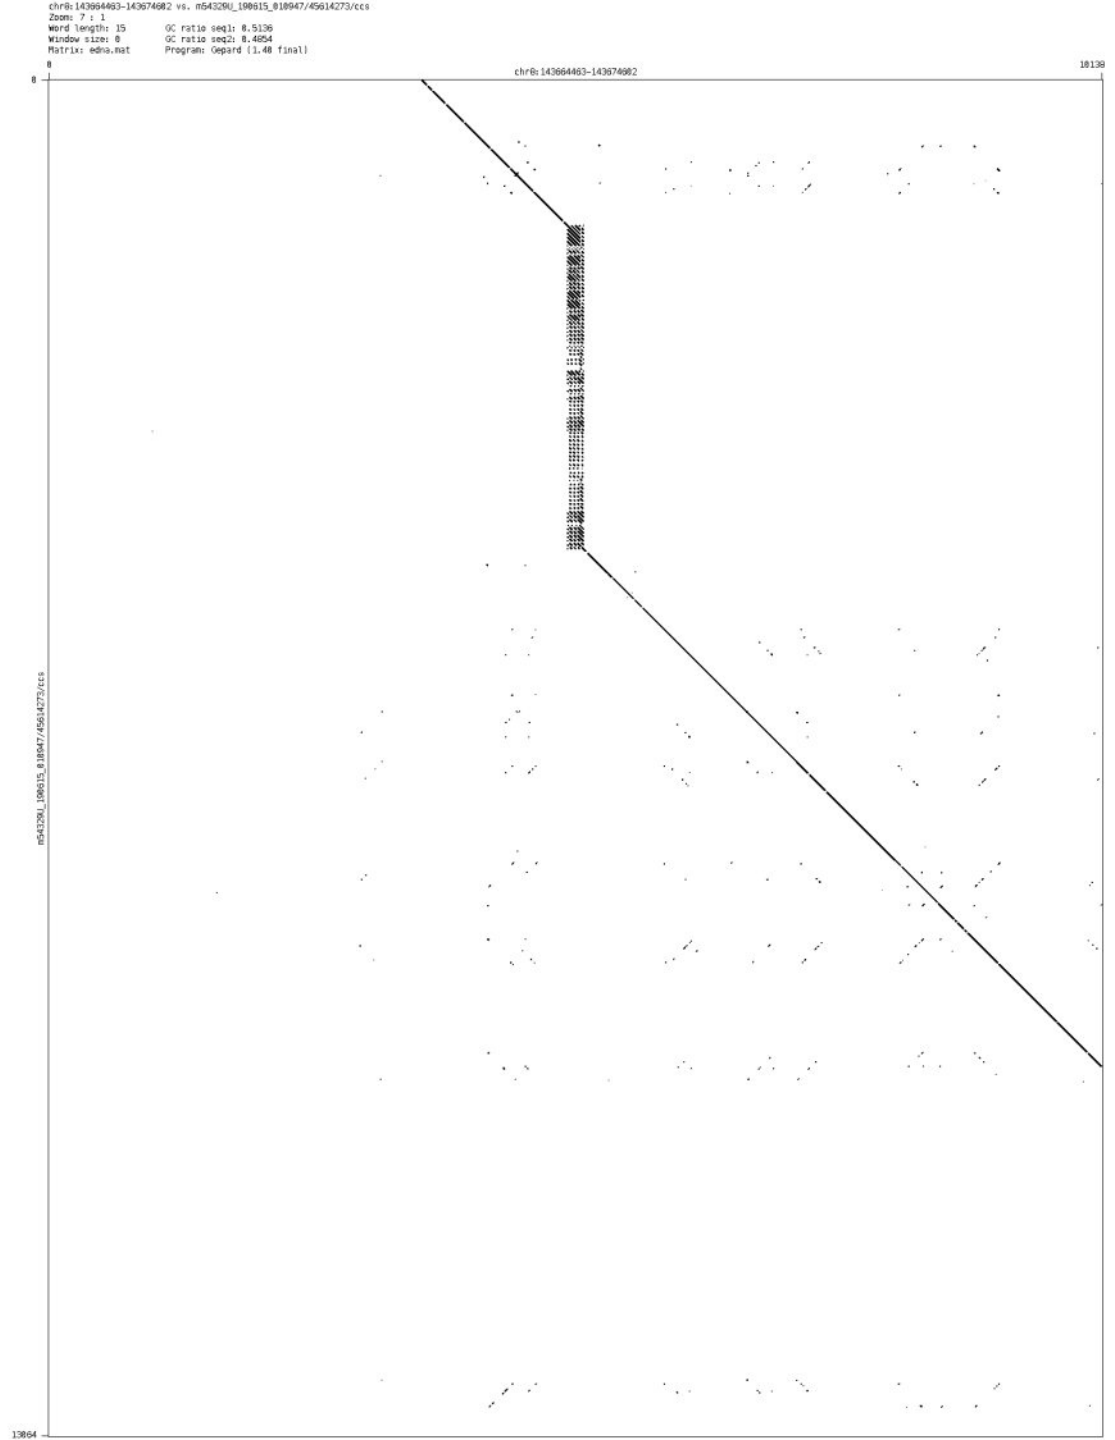

➤ chr8\_144020570\_144024873

chr8:144015570-144029873 vs. m54329U\_190607\_185248/103220044/ccs  
Zoom: 8 : 1  
Word length: 15 GC ratio seq1: 0.5043  
Window size: 0 GC ratio seq2: 0.5400  
Matrix: edna.mat Program: Gepard (1.40 final)

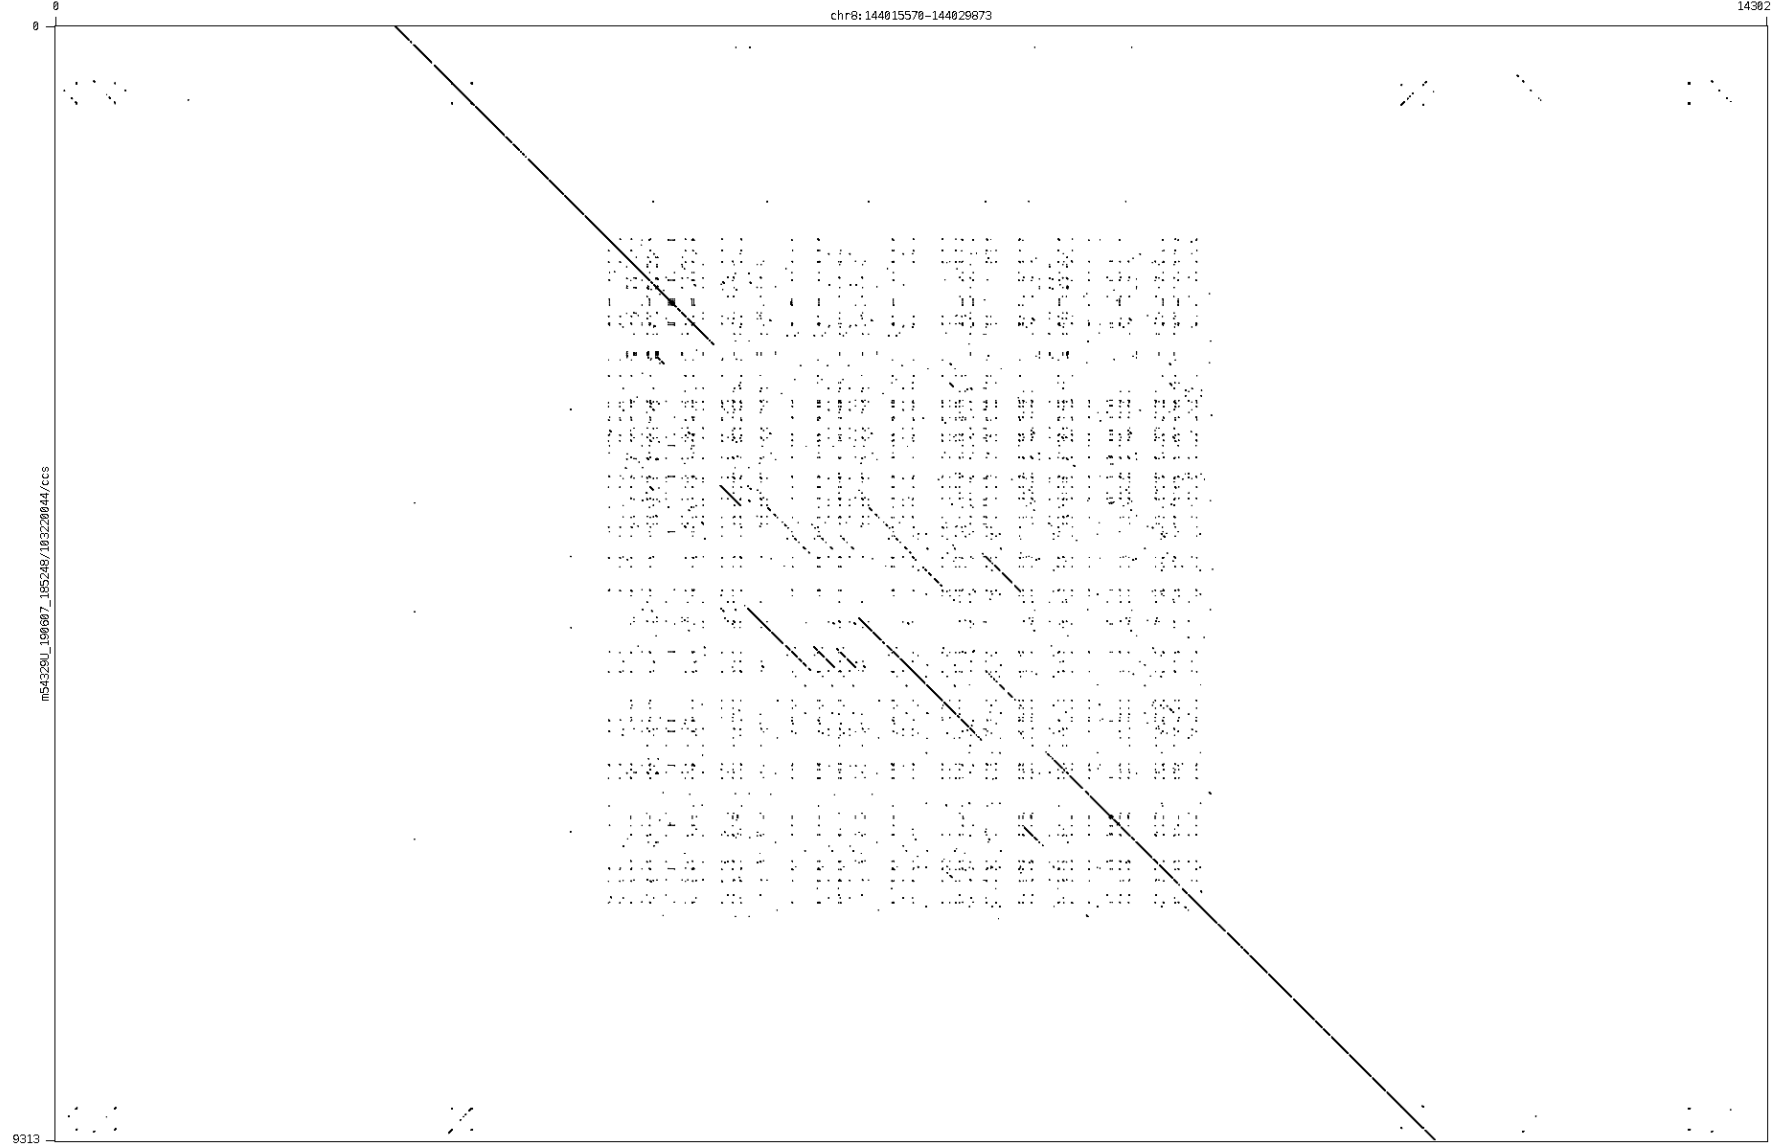

➤ chr8\_144125777\_144125935

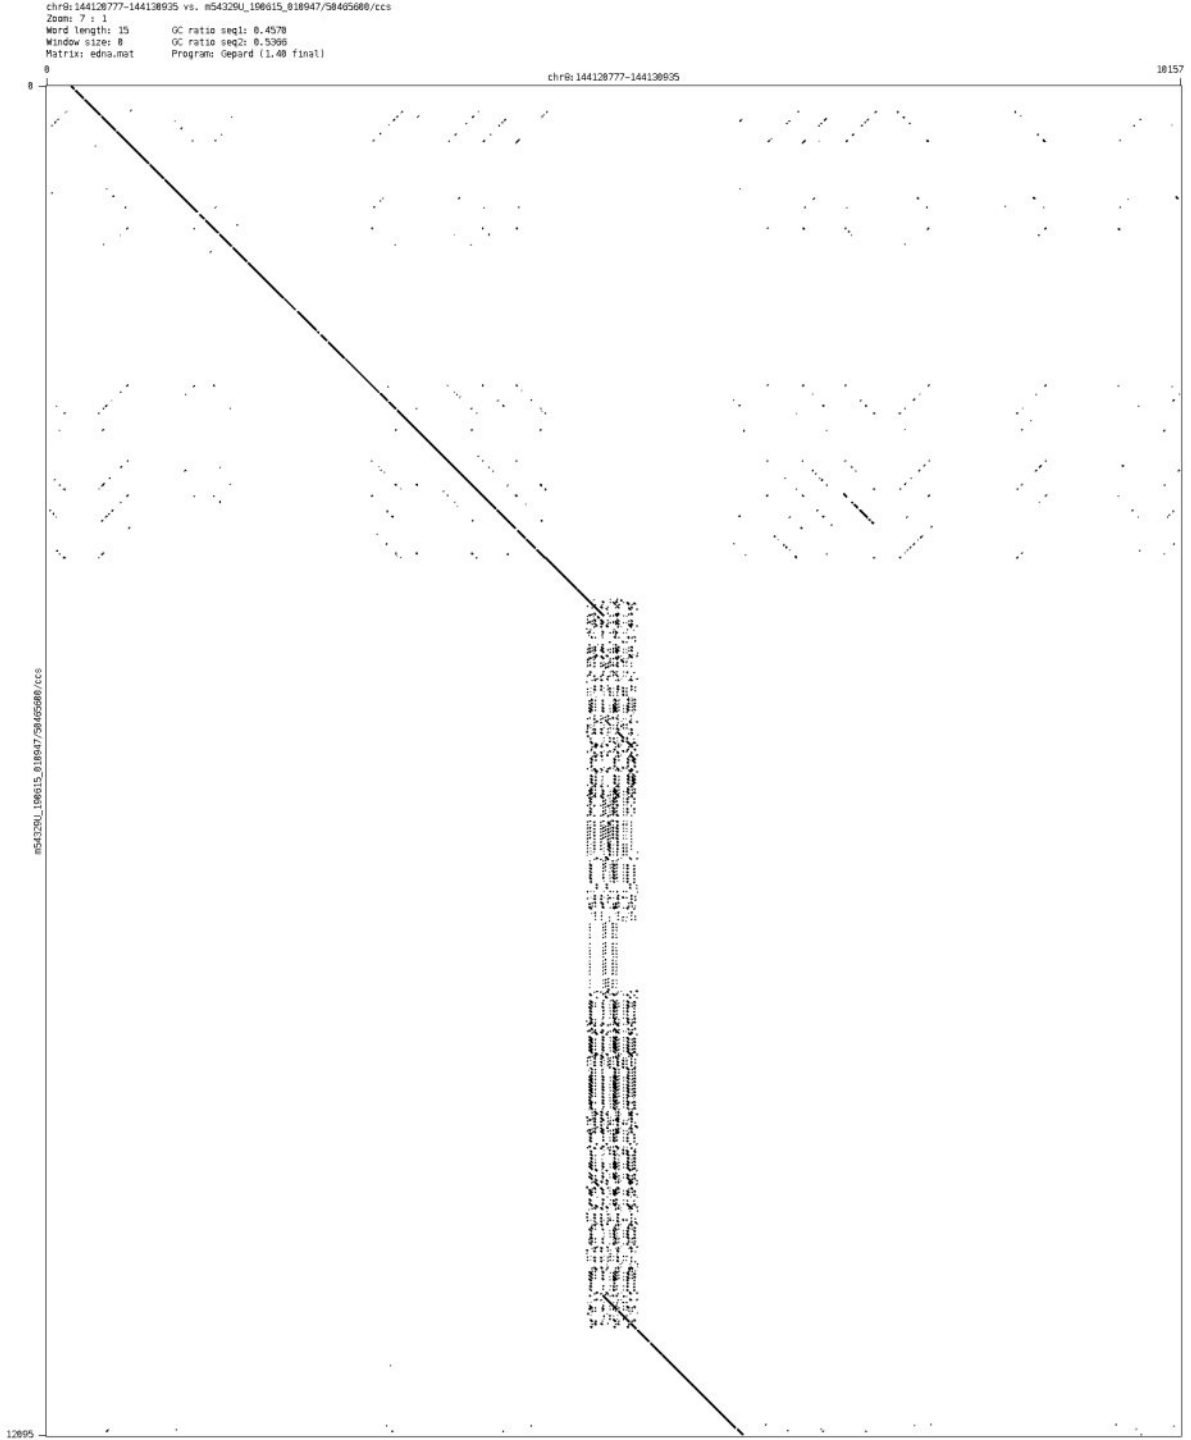

➤ chr8\_144233387\_144233472

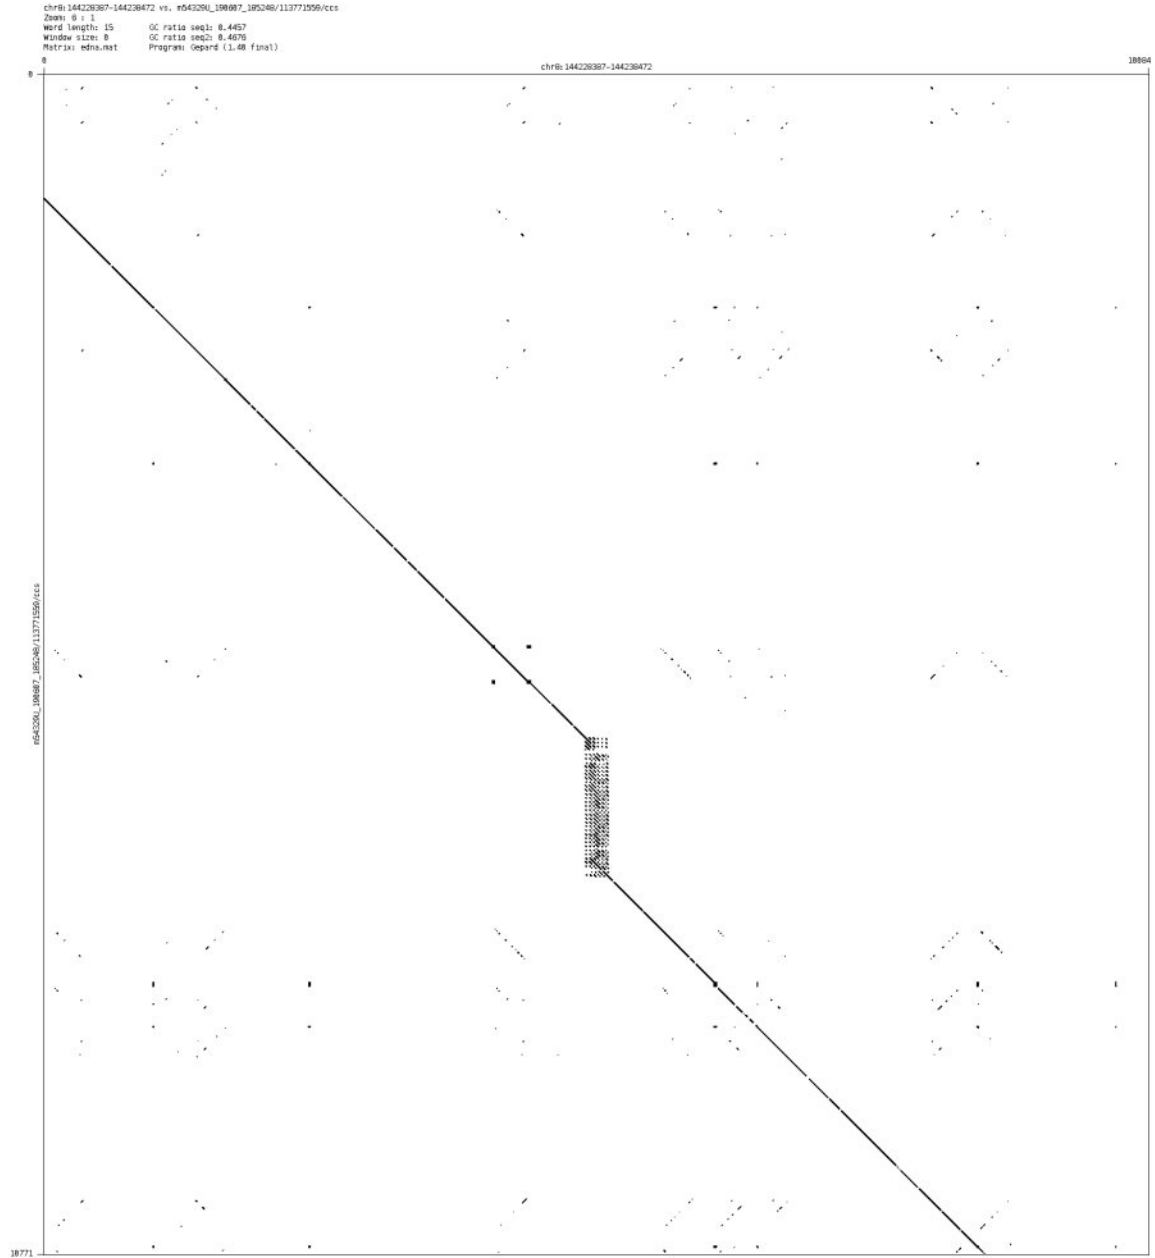



➤ chr8\_144687804\_144687929

chr8:144682084-144682029 vs. m54329U\_100615\_018047/161040619/ccs  
Zoom: 7 : 1 GC ratio seq1: 0.5486  
Word length: 15 GC ratio seq2: 0.5308  
Window size: 8 Program: cepd (1.48 final)  
Matrix: edna.mat

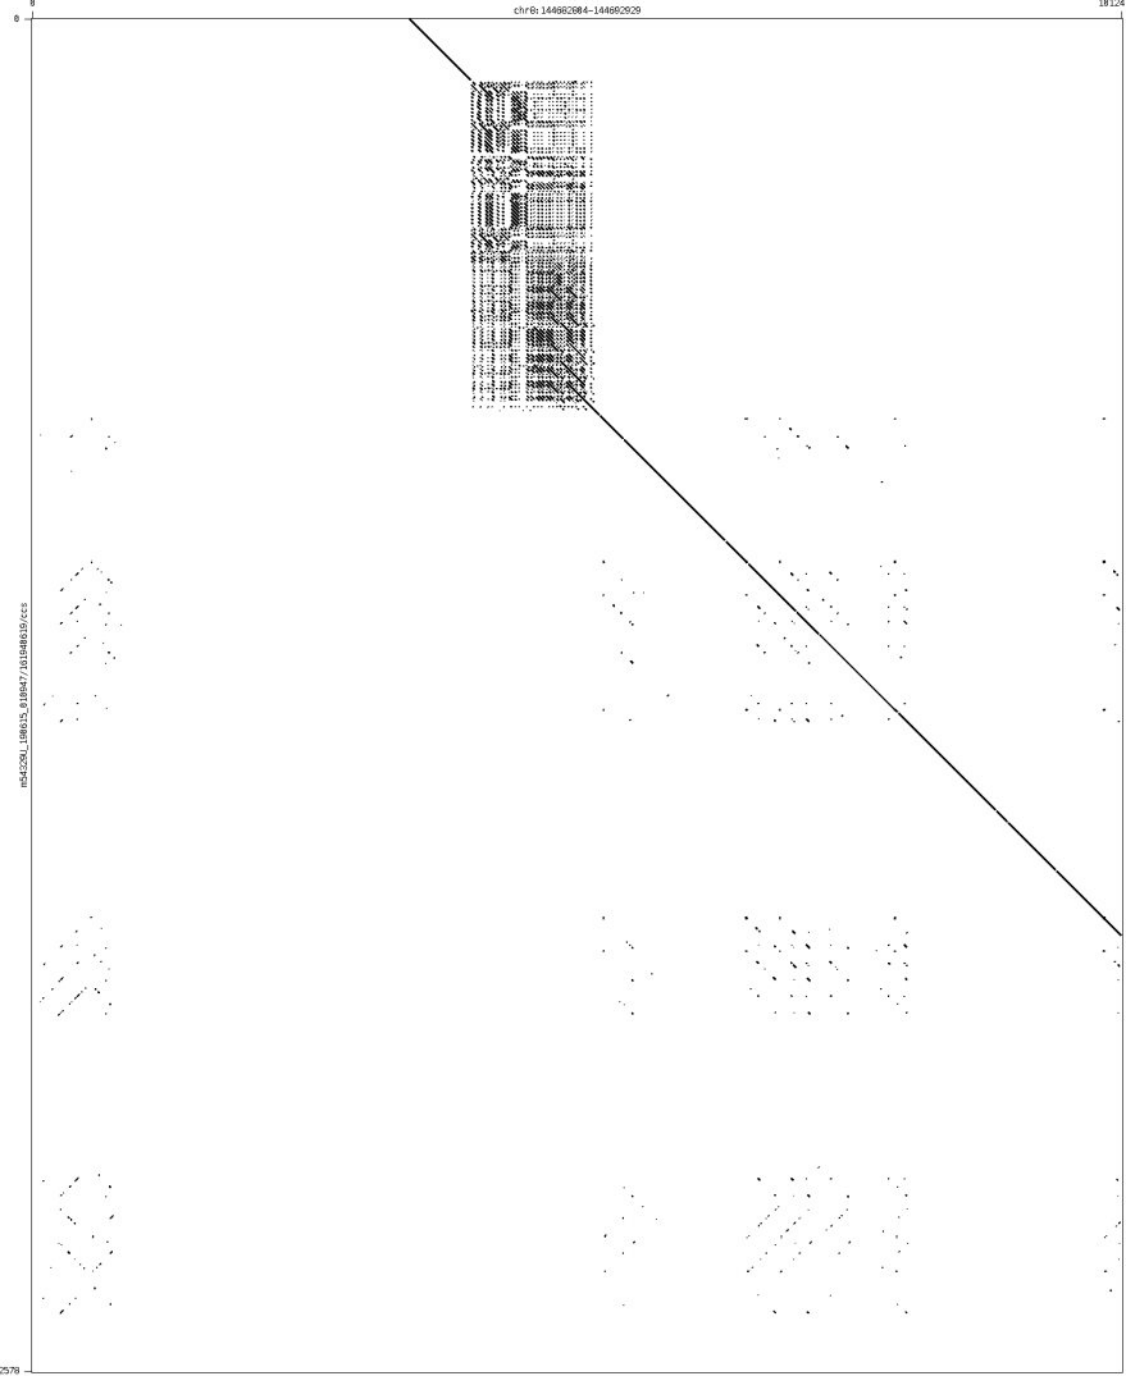

➤ chr8\_144946952\_144947229

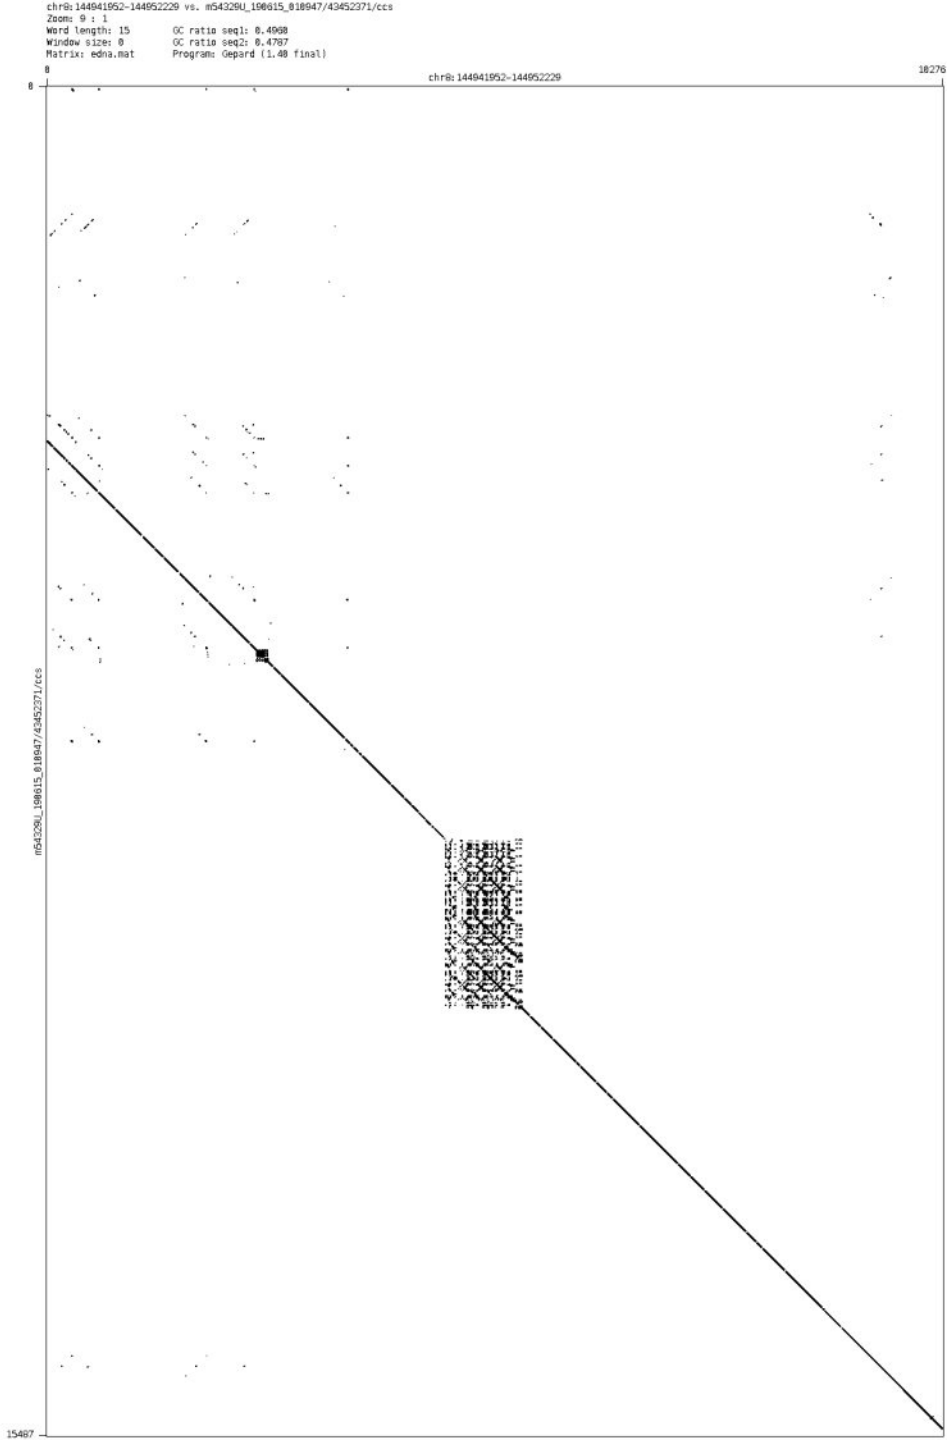

➤ chr9\_808747\_808859

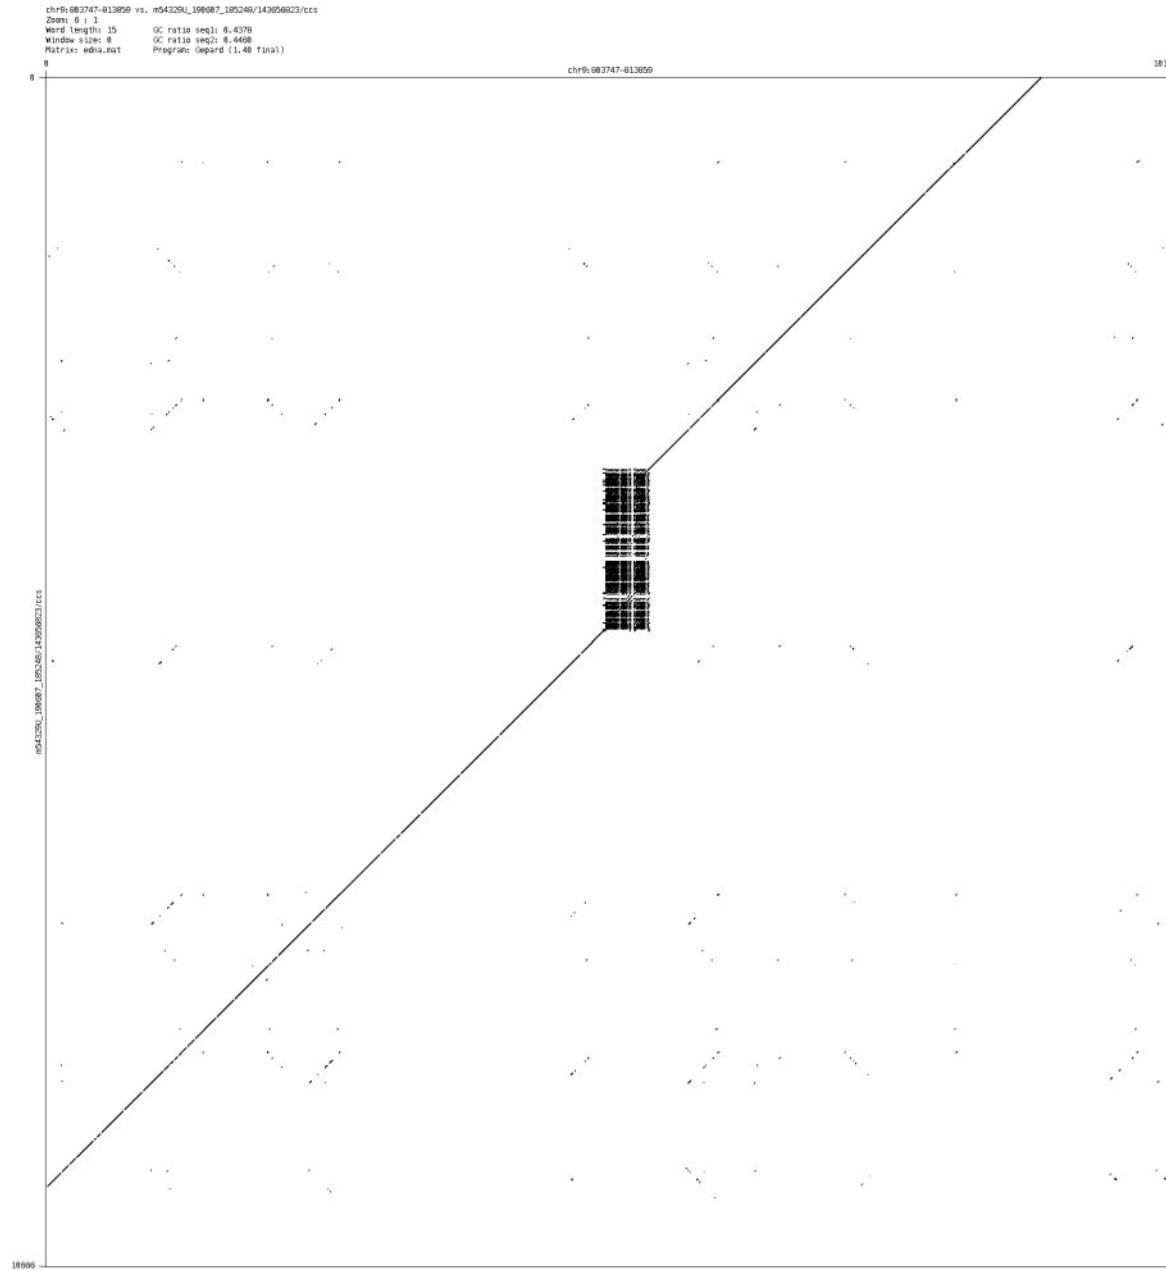

➤ chr9\_4713910\_4714160

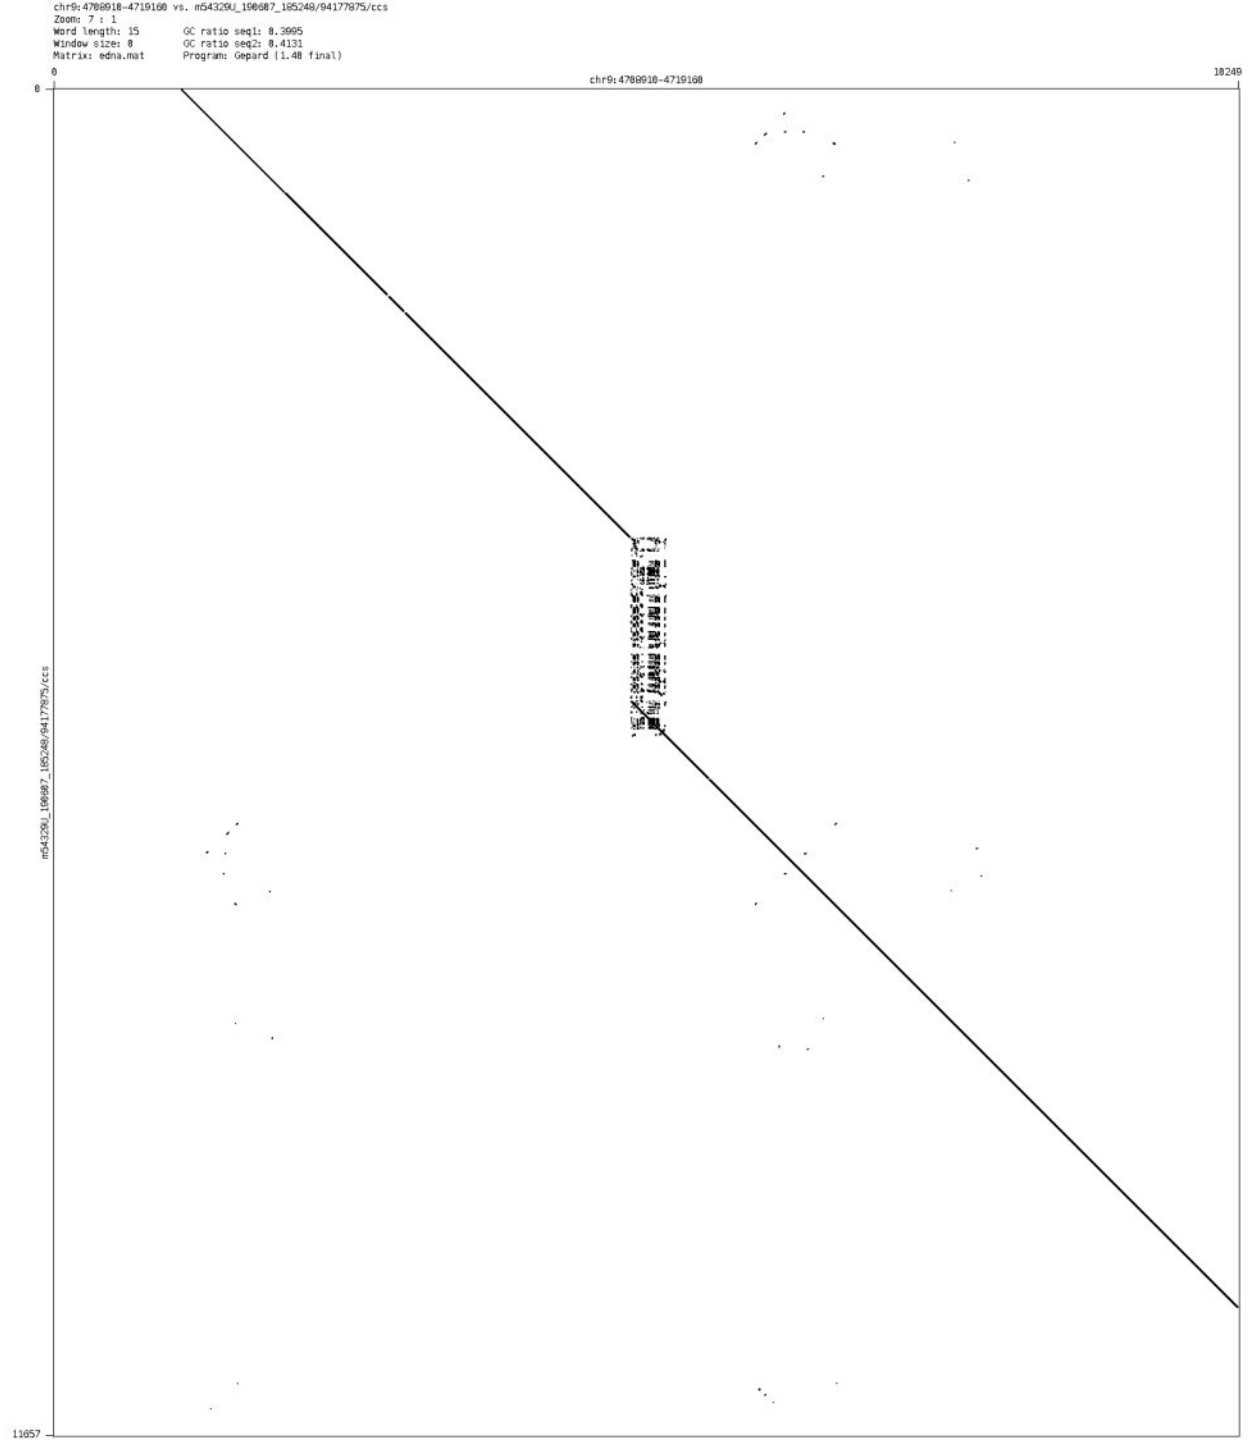

➤ chr9\_15126725\_15126845

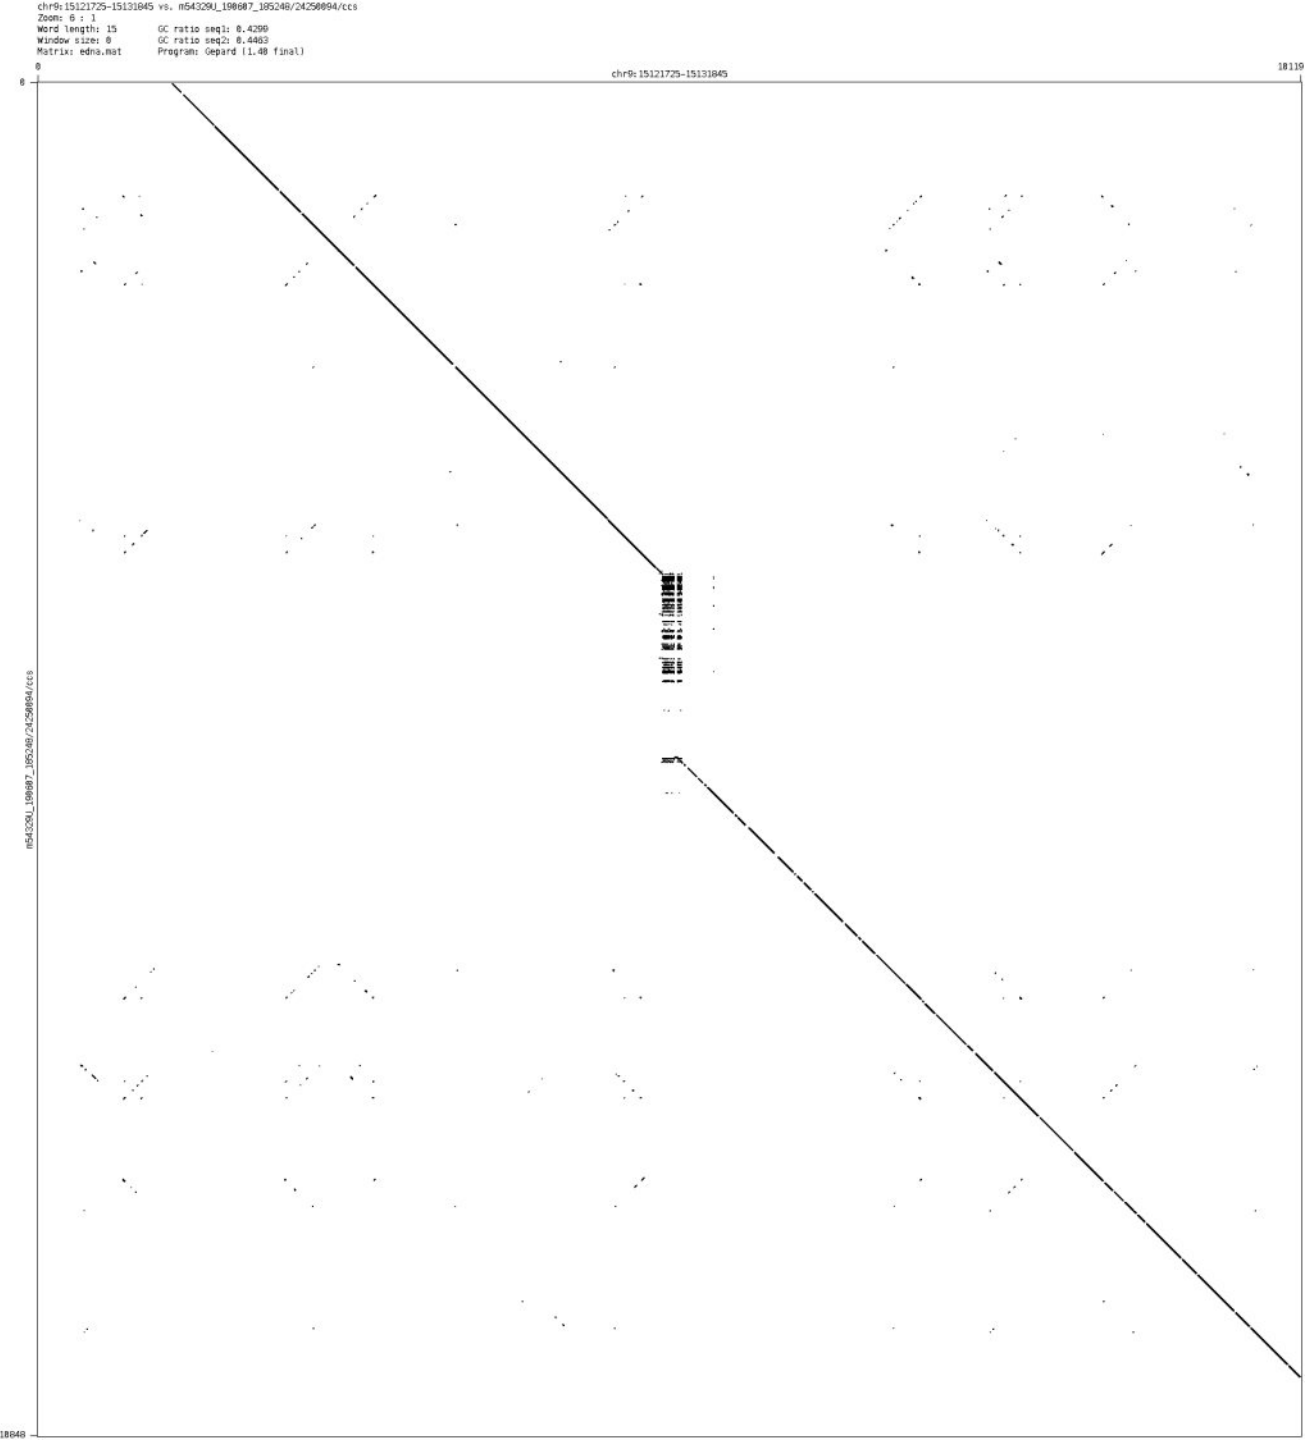

➤ chr9\_29591409\_29593057

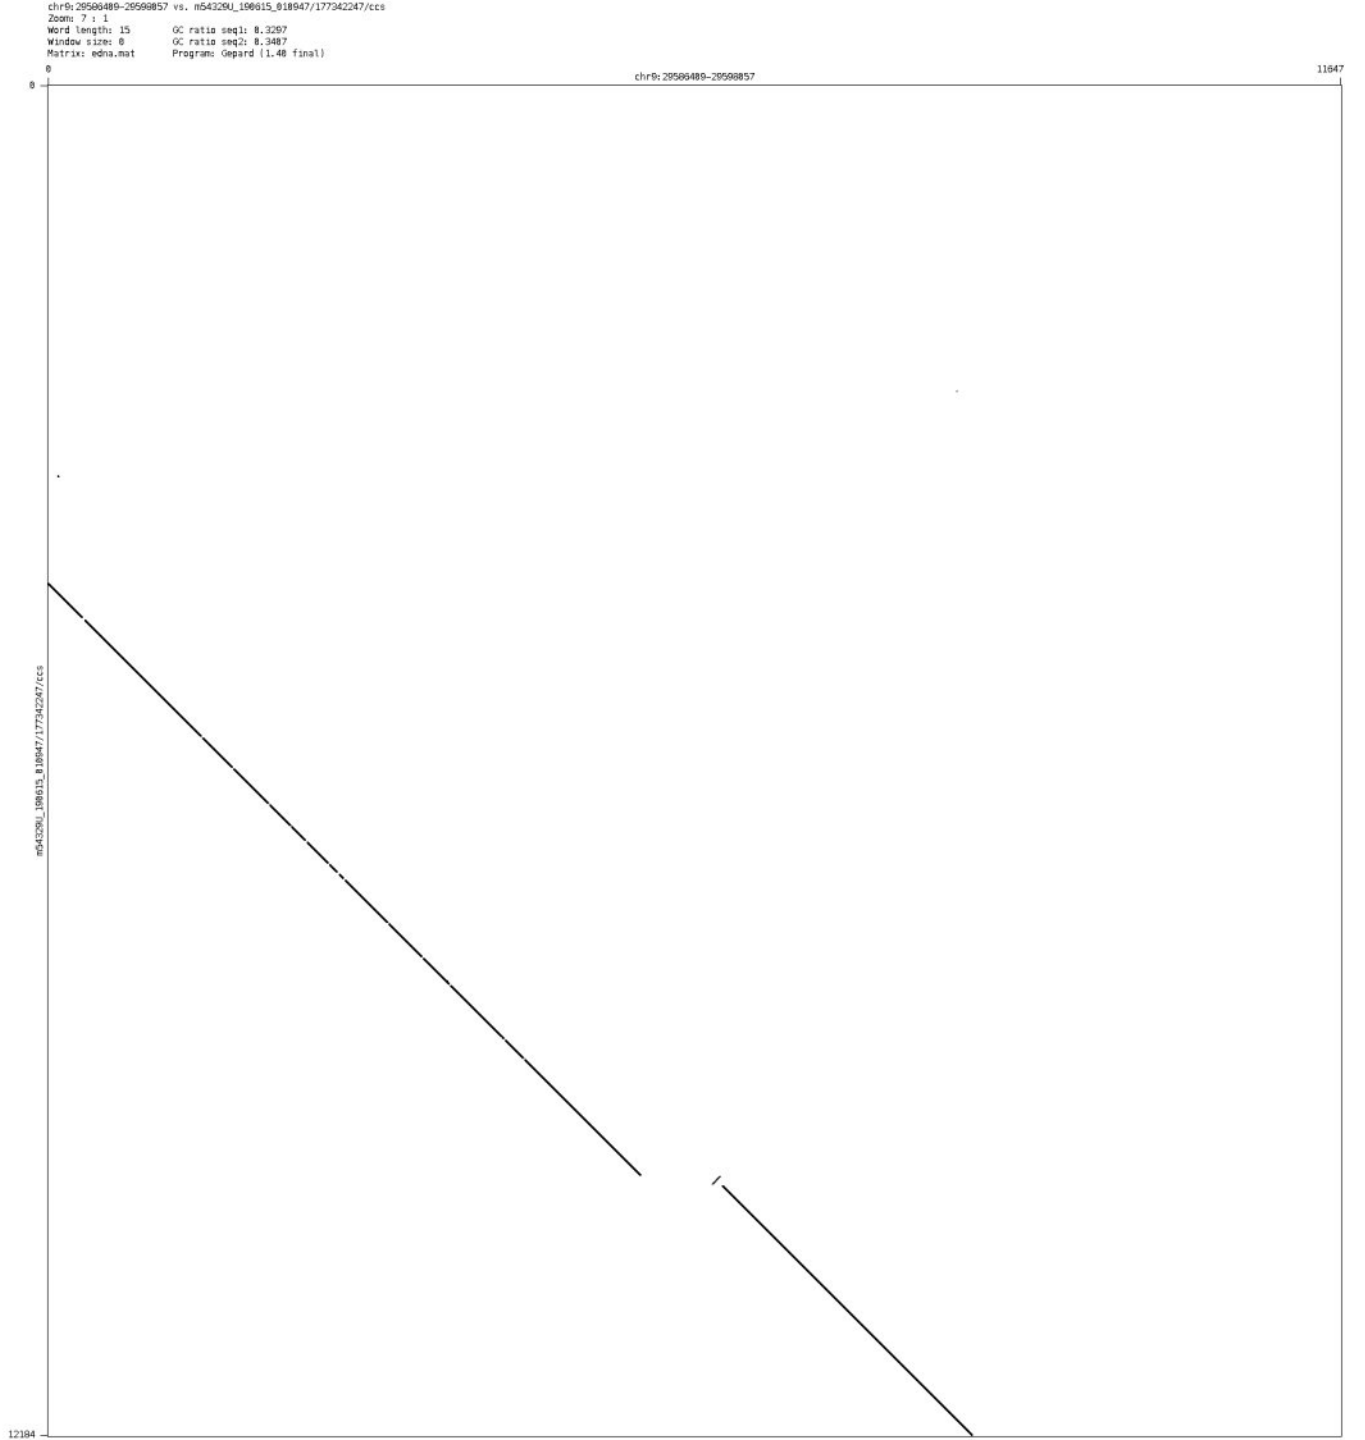

➤ chr9\_35913547\_35914174

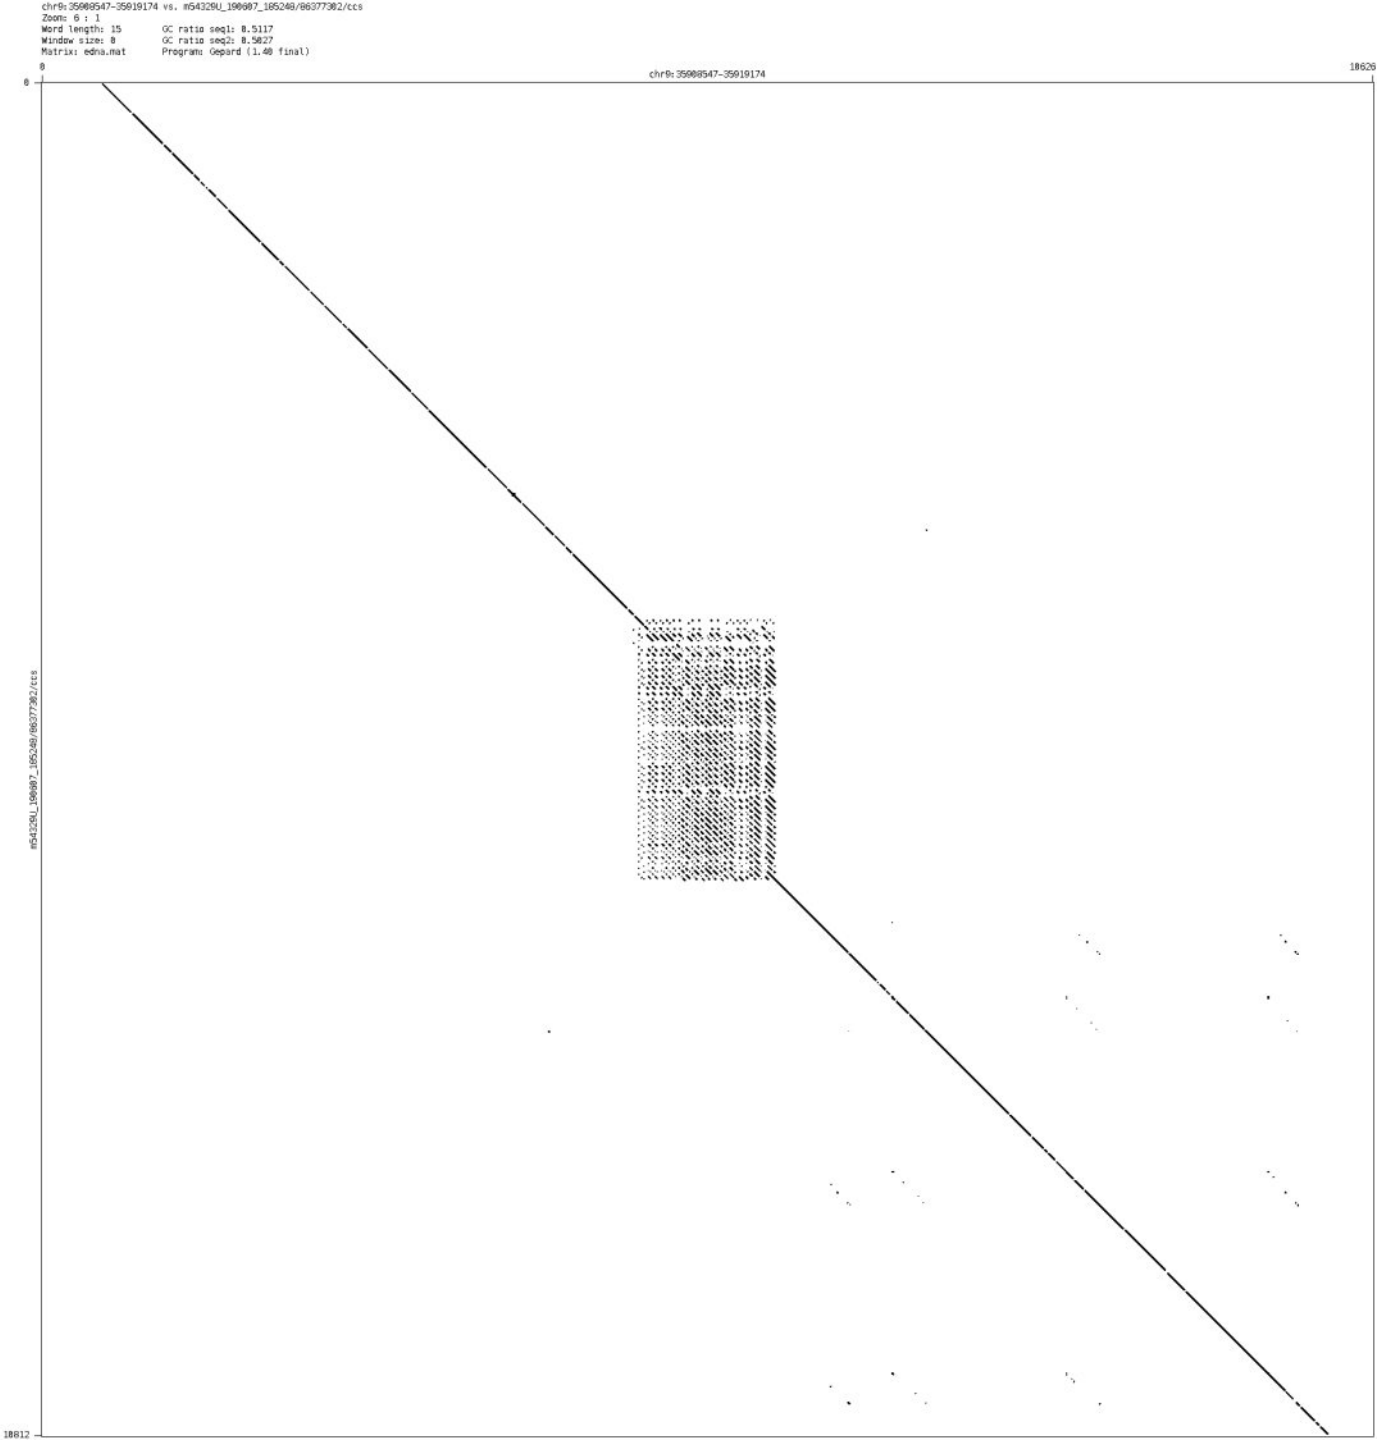

# ➤ chr9\_62806317\_62823001

chr9:62801317-62828001 vs. m54329U\_190607\_185248/130482665/ccs  
Zoom: 15 : 1  
Word length: 15      GC ratio seq1: 0.3933  
Window size: 0      GC ratio seq2: 0.3779  
Matrix: edna.mat      Program: Gepard (1.40 final)

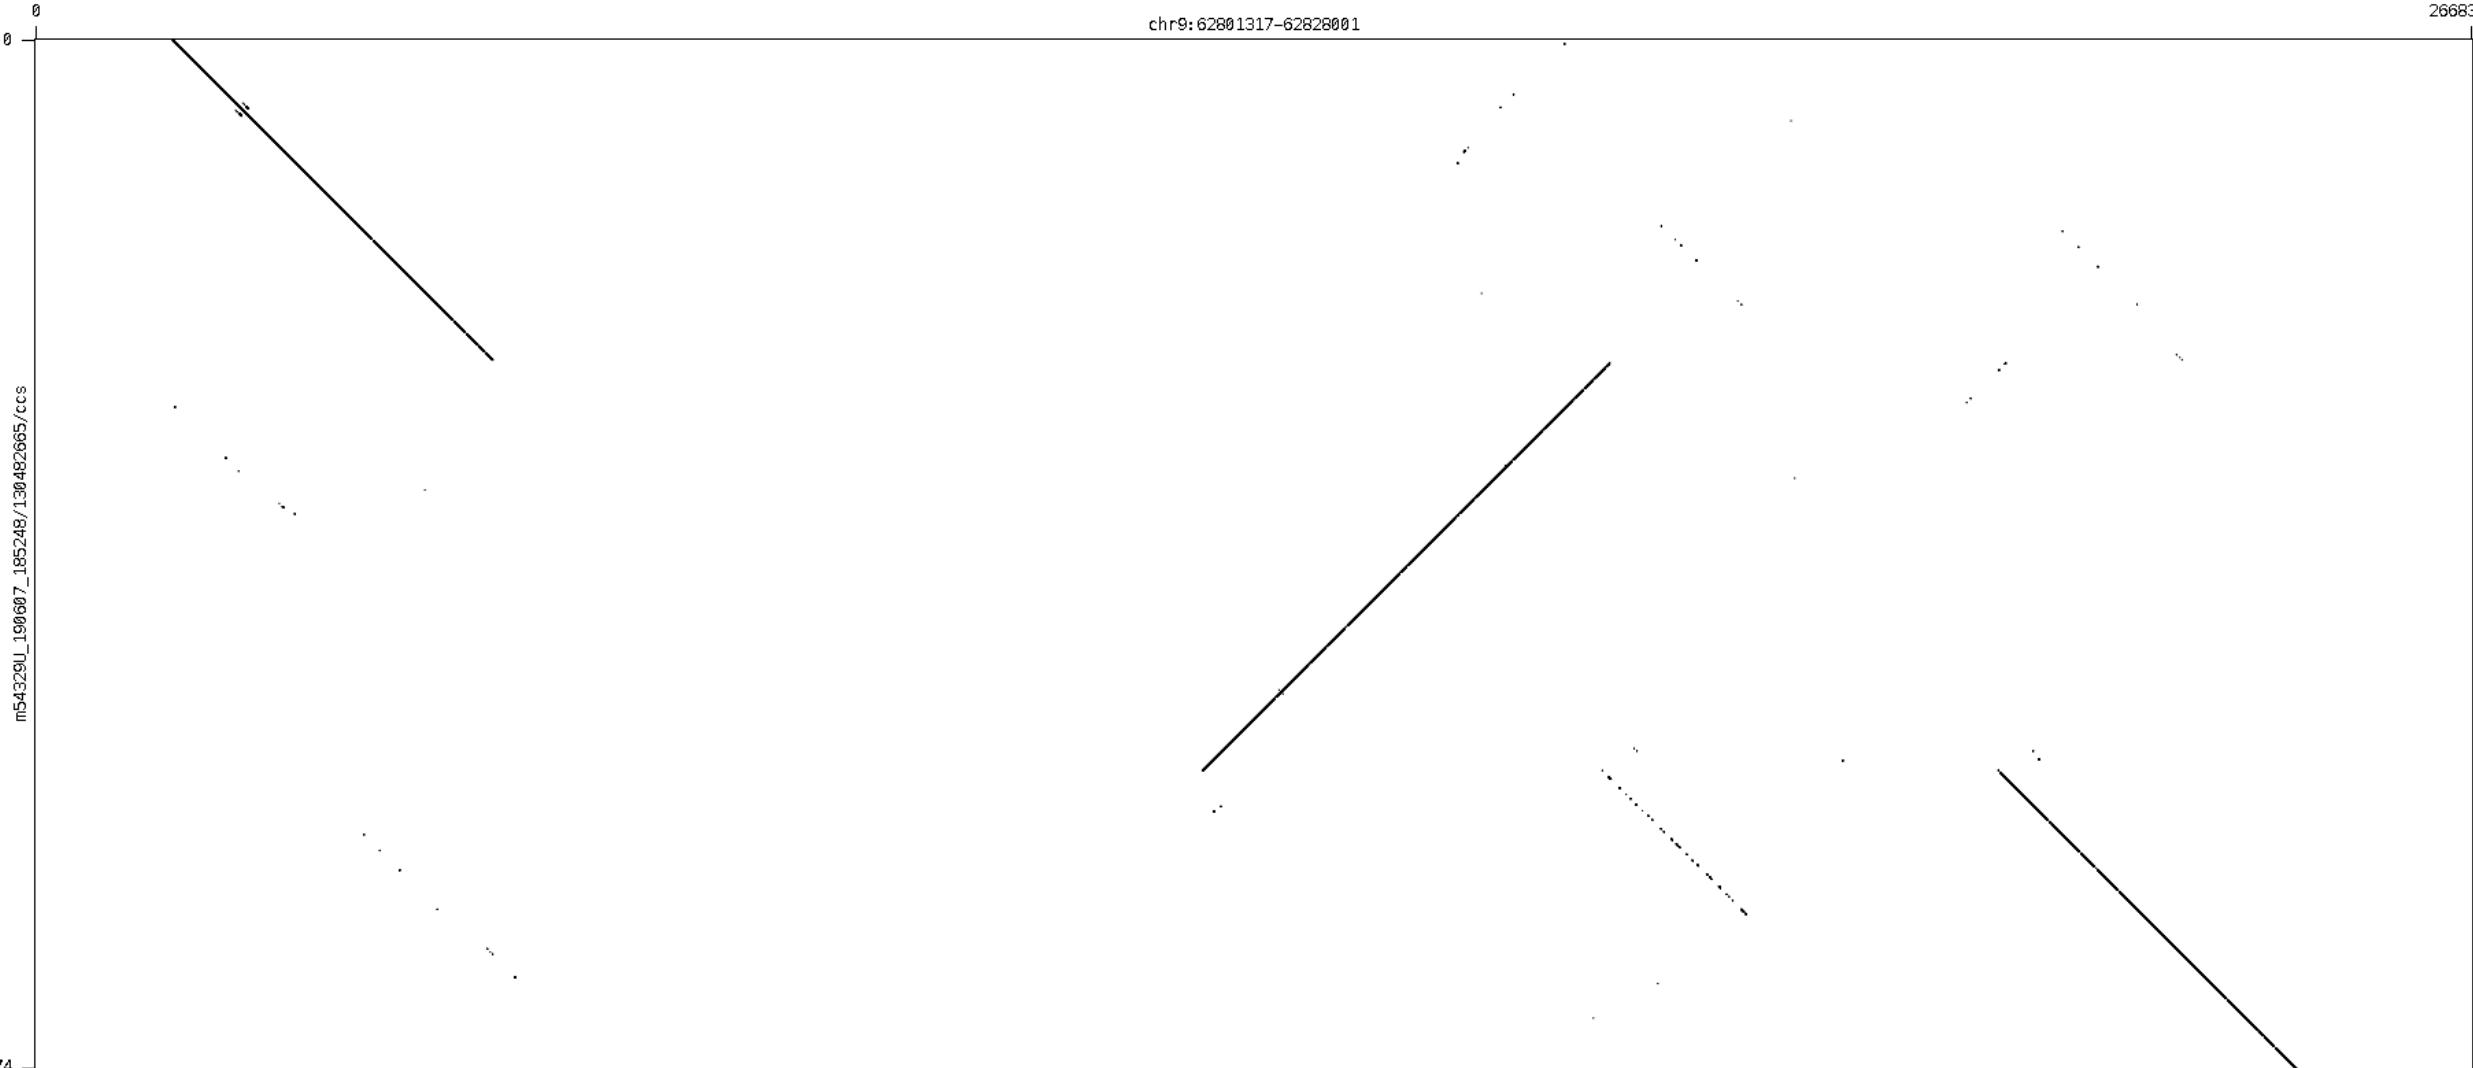



➤ chr9\_86052967\_86053698

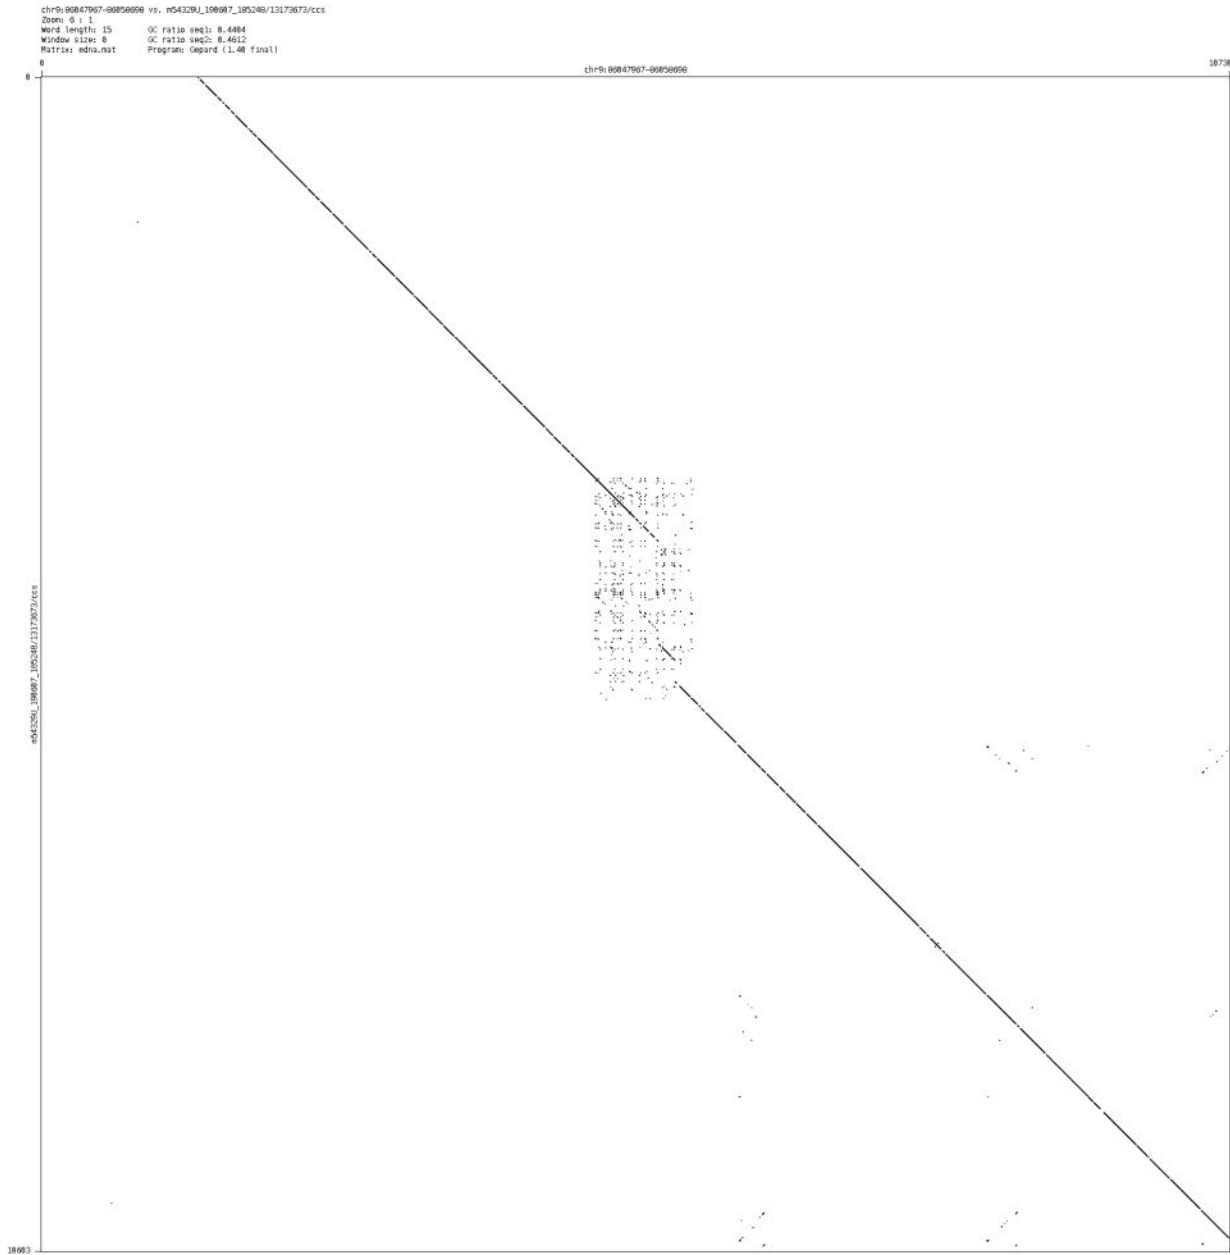

➤ chr9\_89254239\_89254375

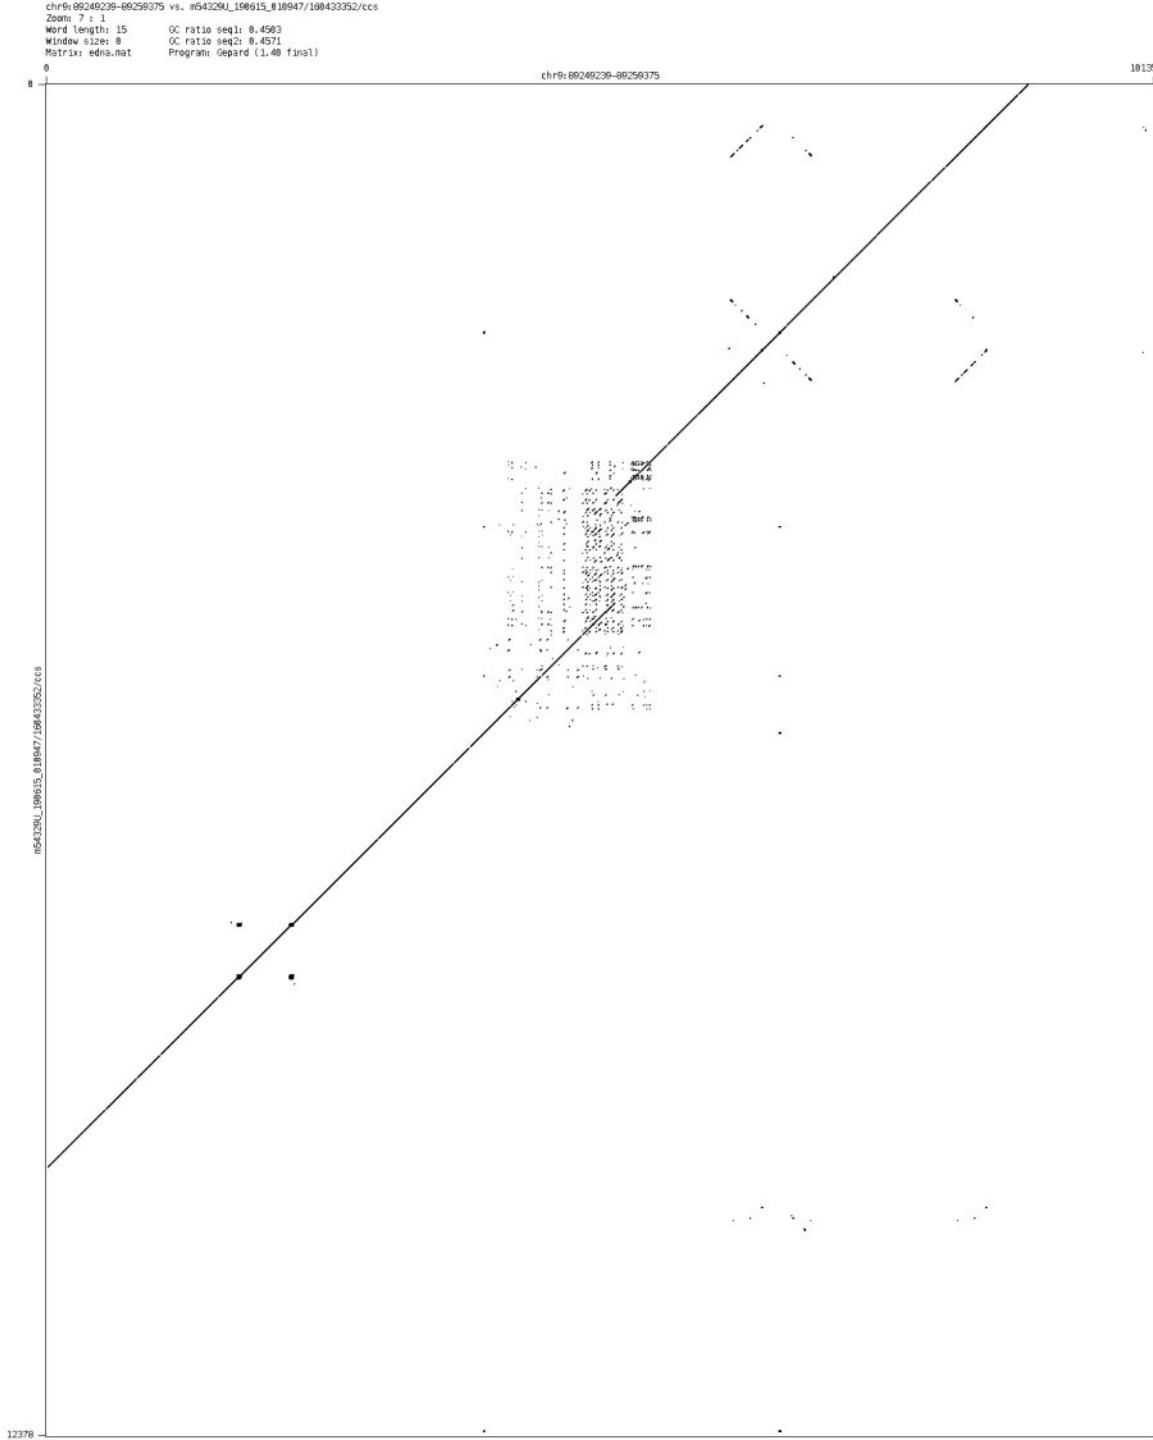

➤ chr9\_89671543\_89671681

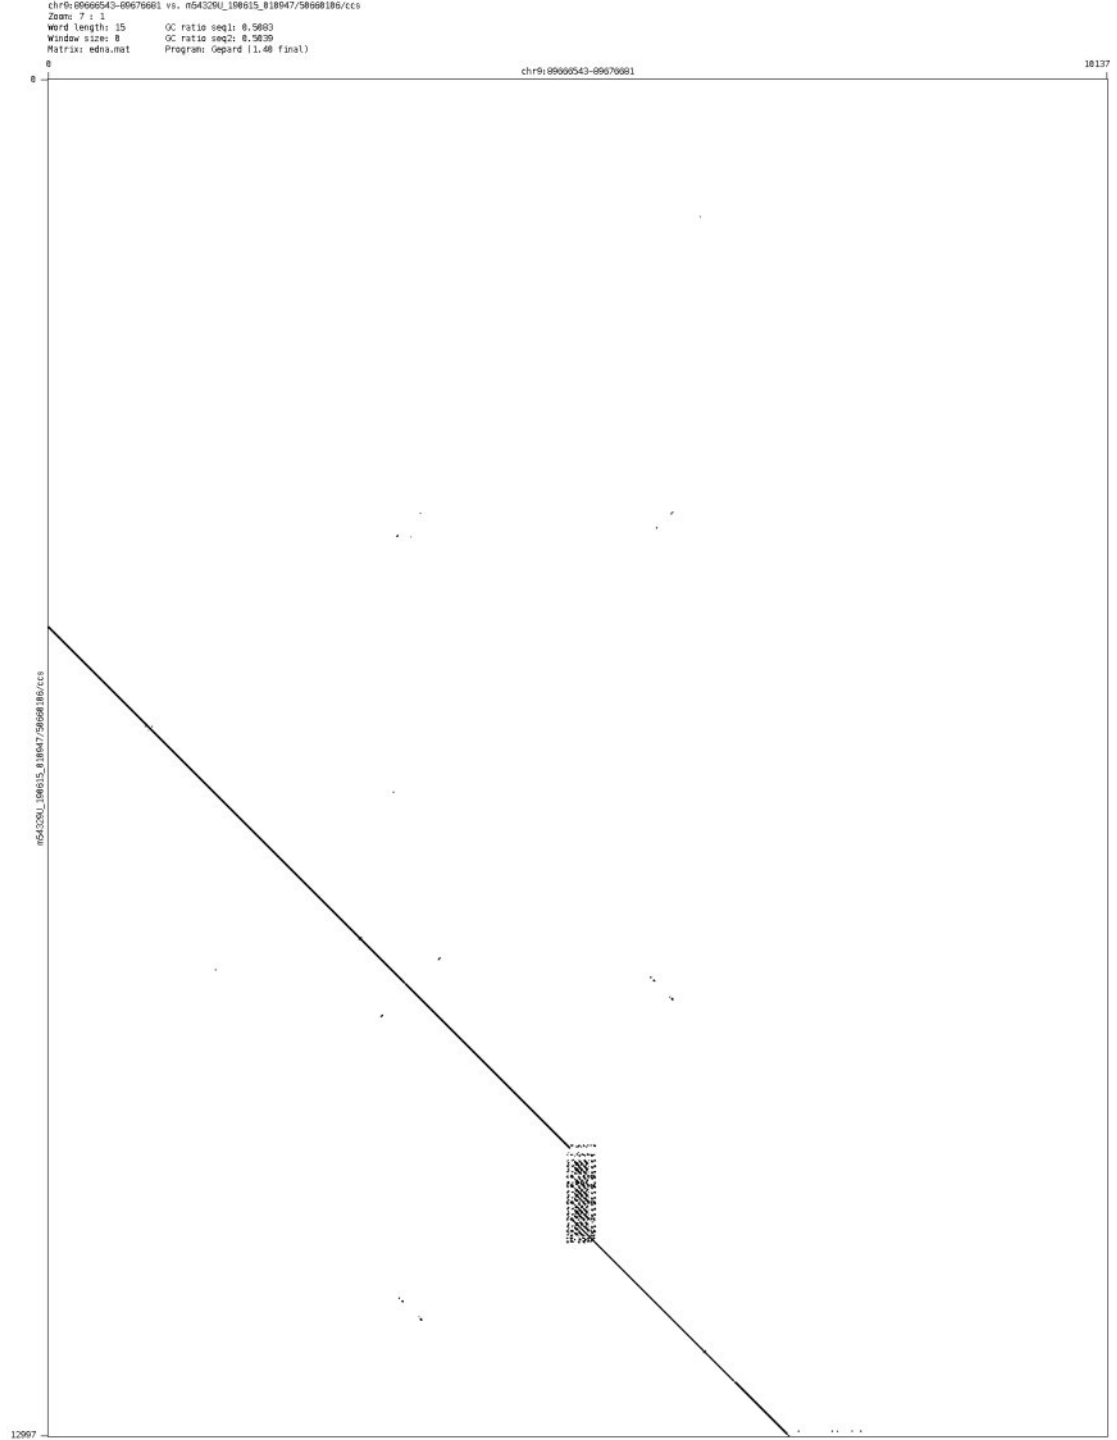

➤ chr9\_91695537\_91695651

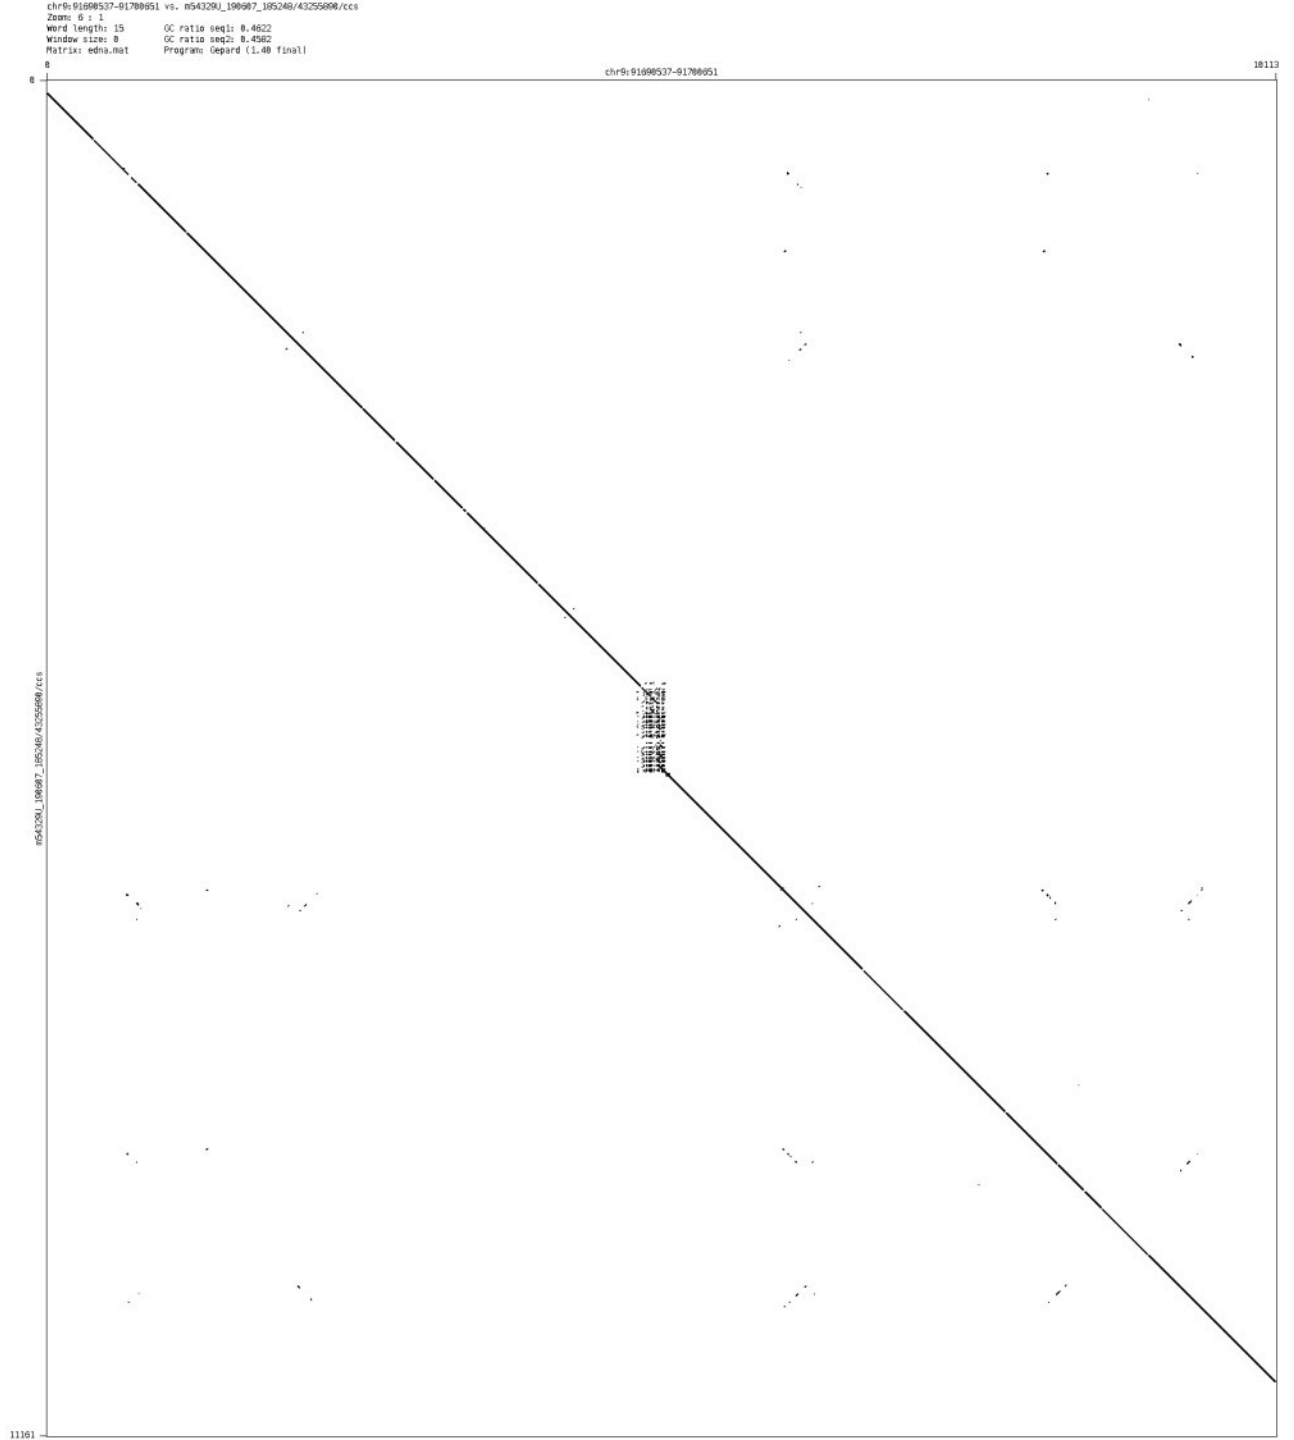

➤ chr9\_109523566\_109524653

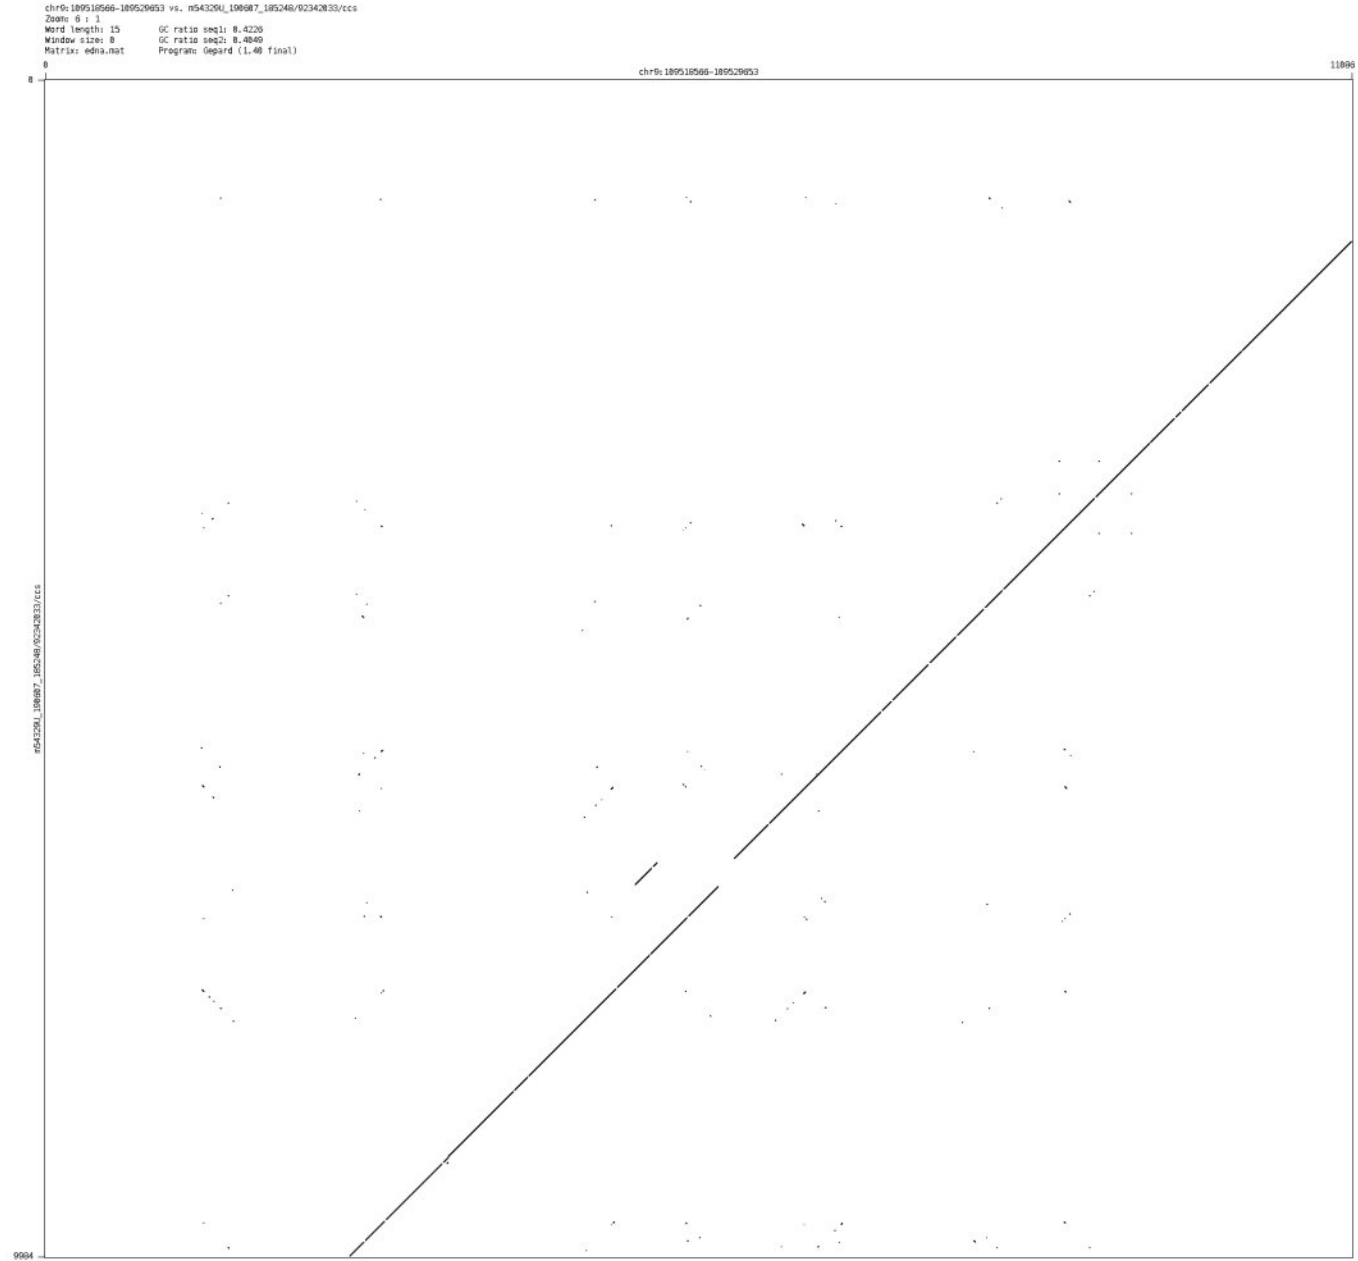

➤ chr9\_123347689\_123347773

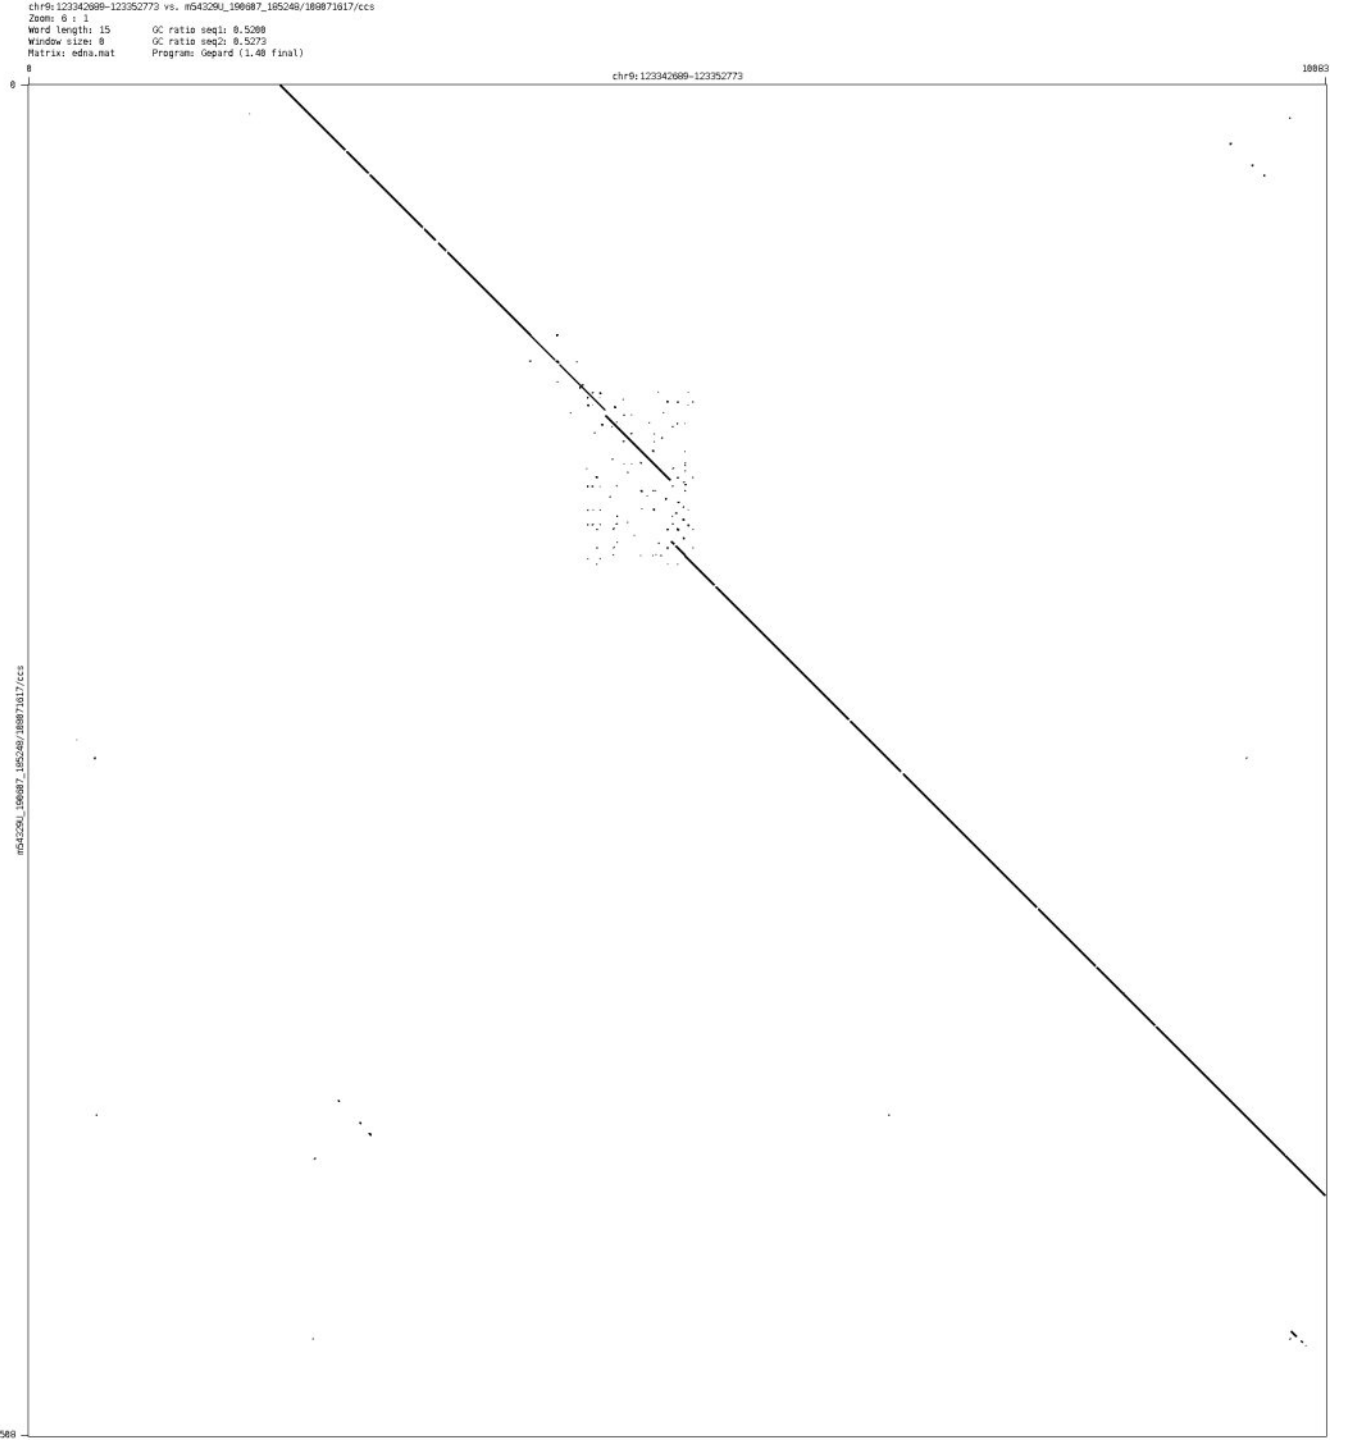

➤ chr9\_130955139\_130955274

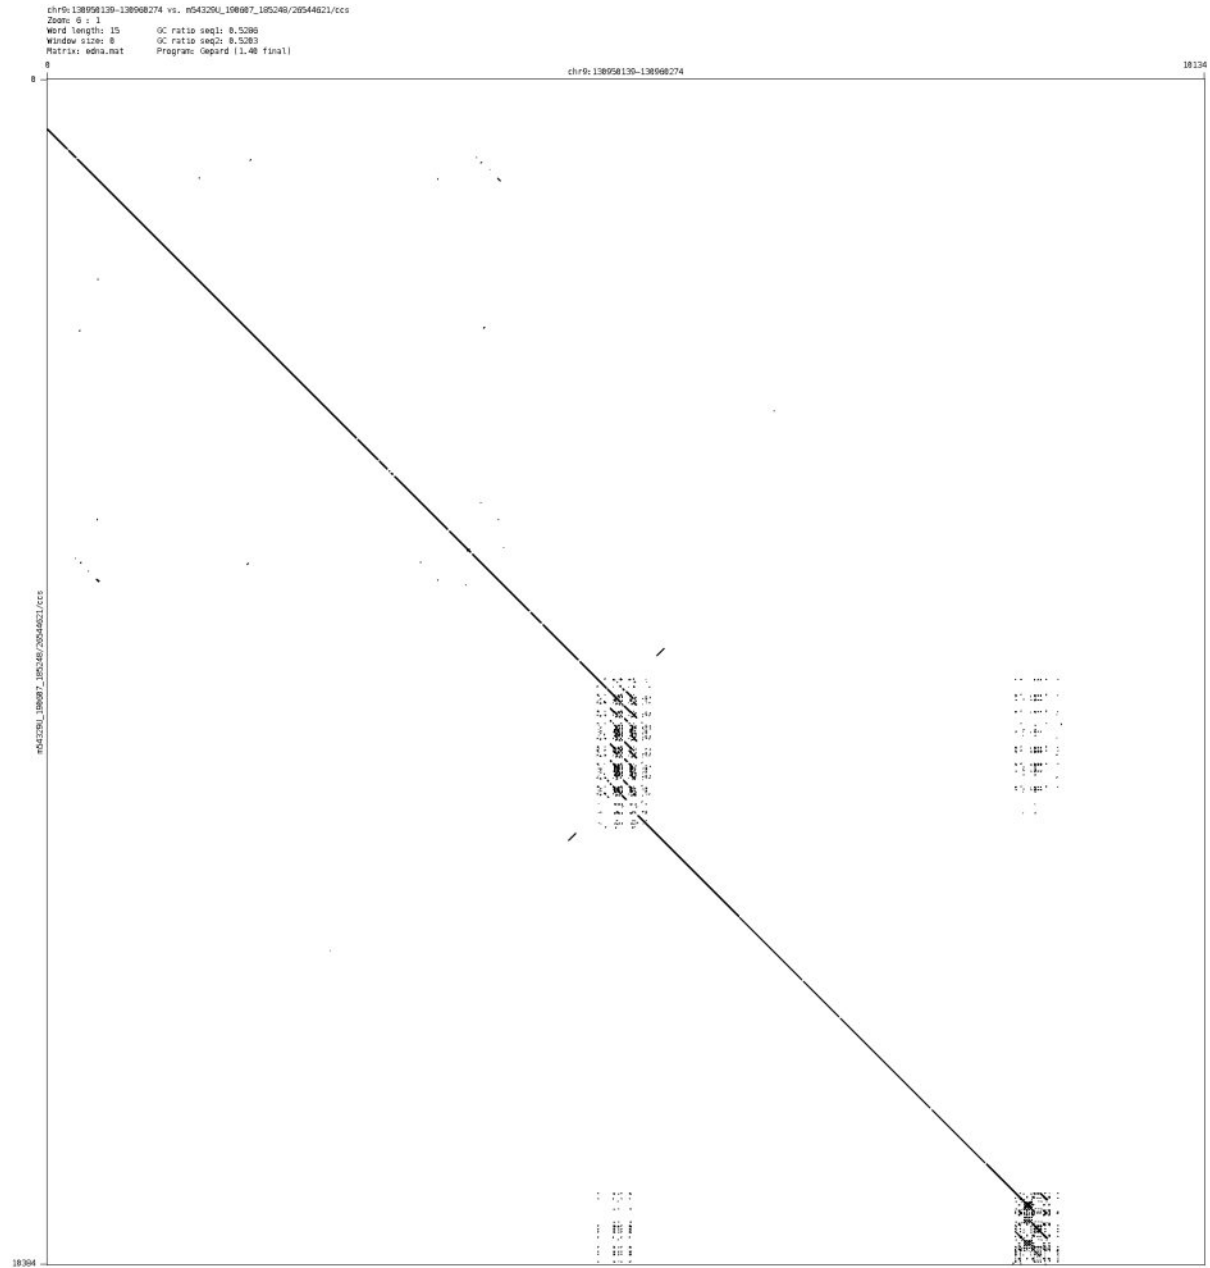

➤ chr9\_134685195\_134685386

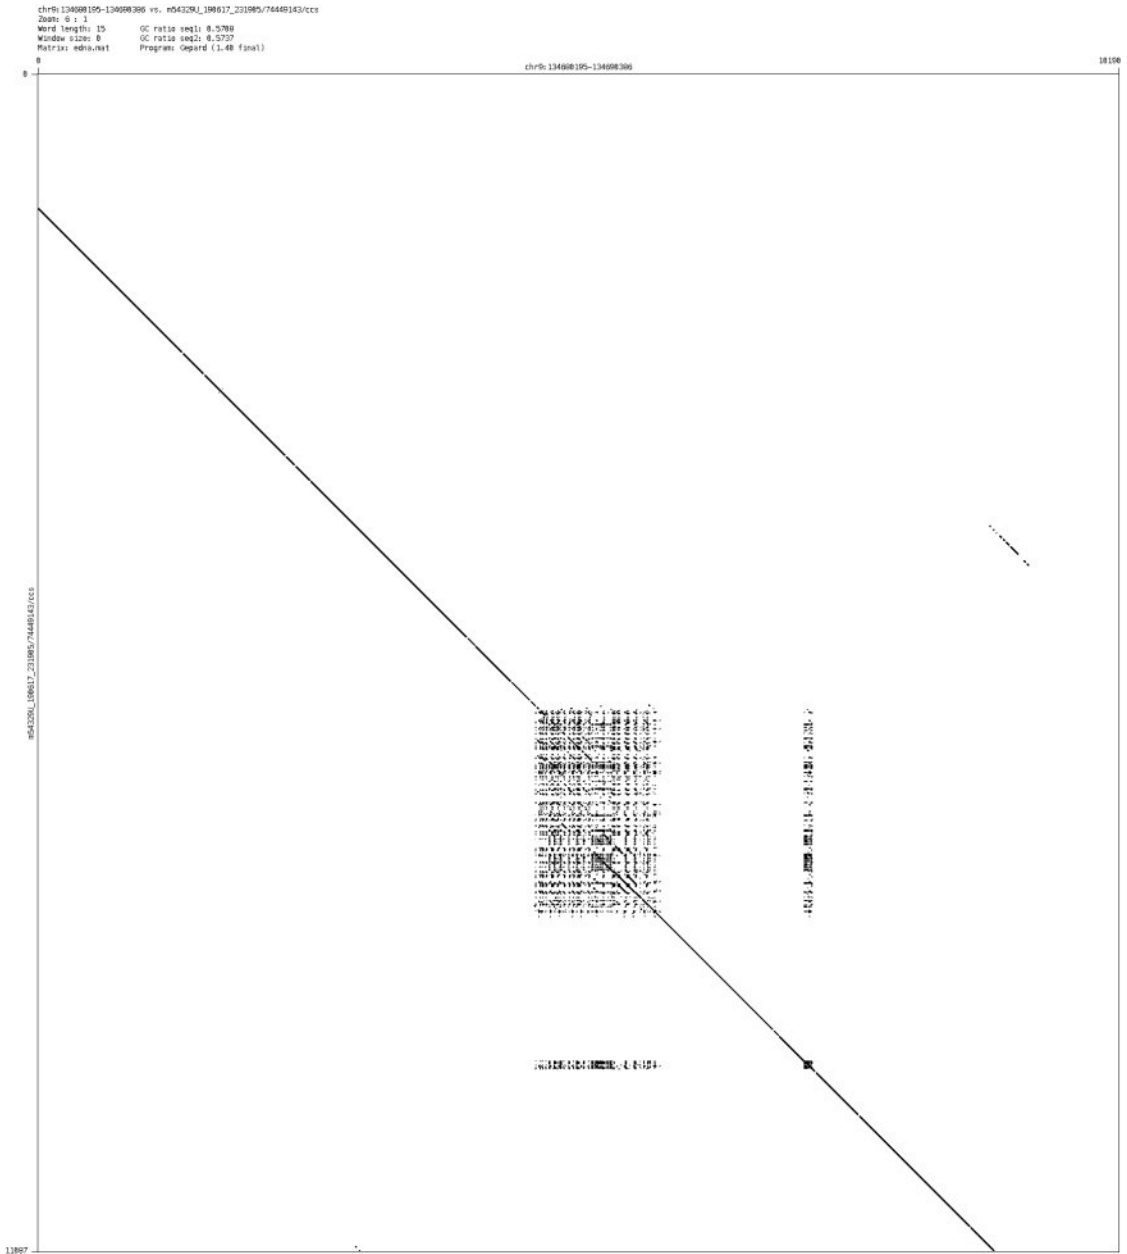



➤ chr9\_136632692\_136632989

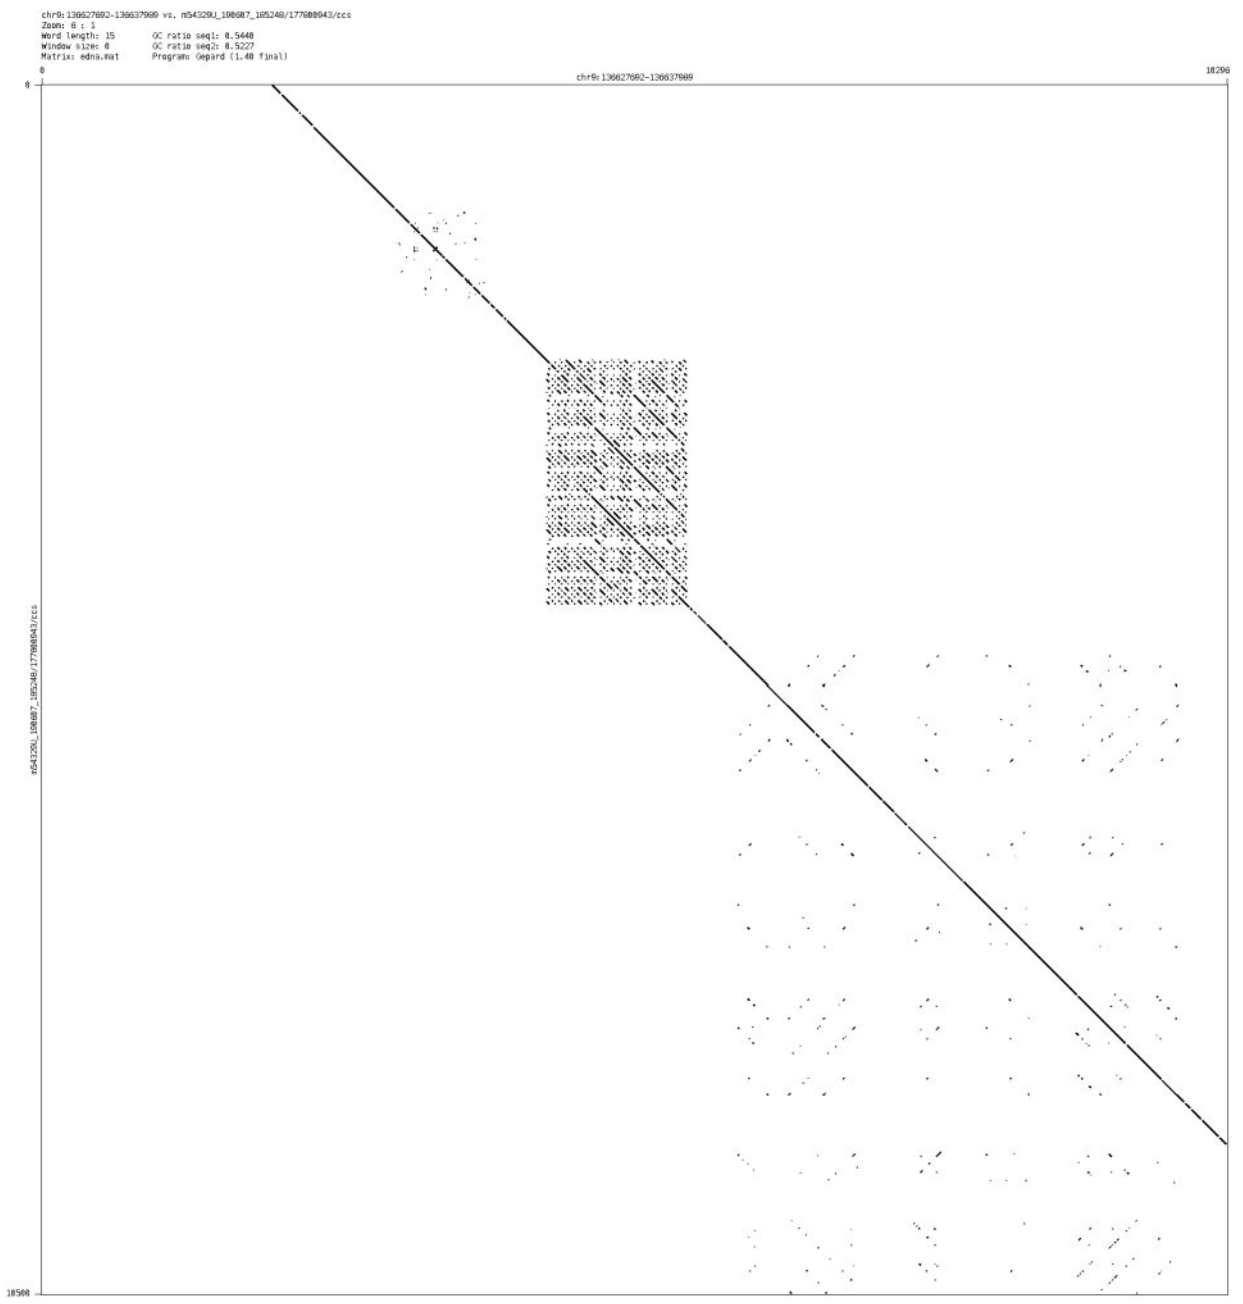

➤ chr9\_137328196\_137328432

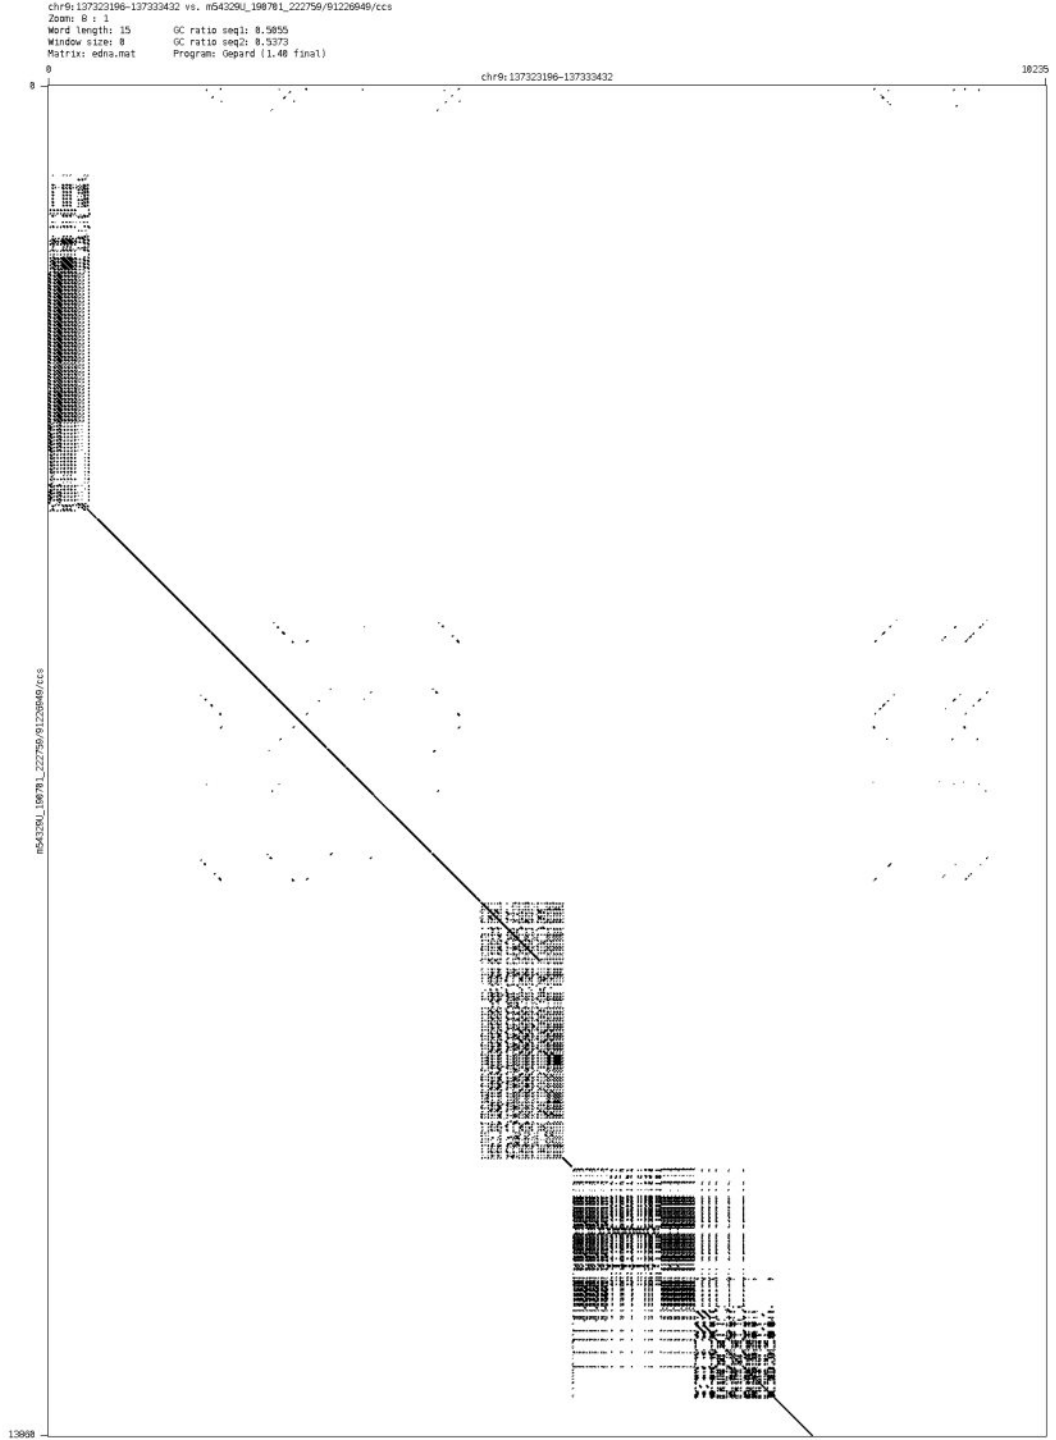

➤ chr9\_137355493\_137355619

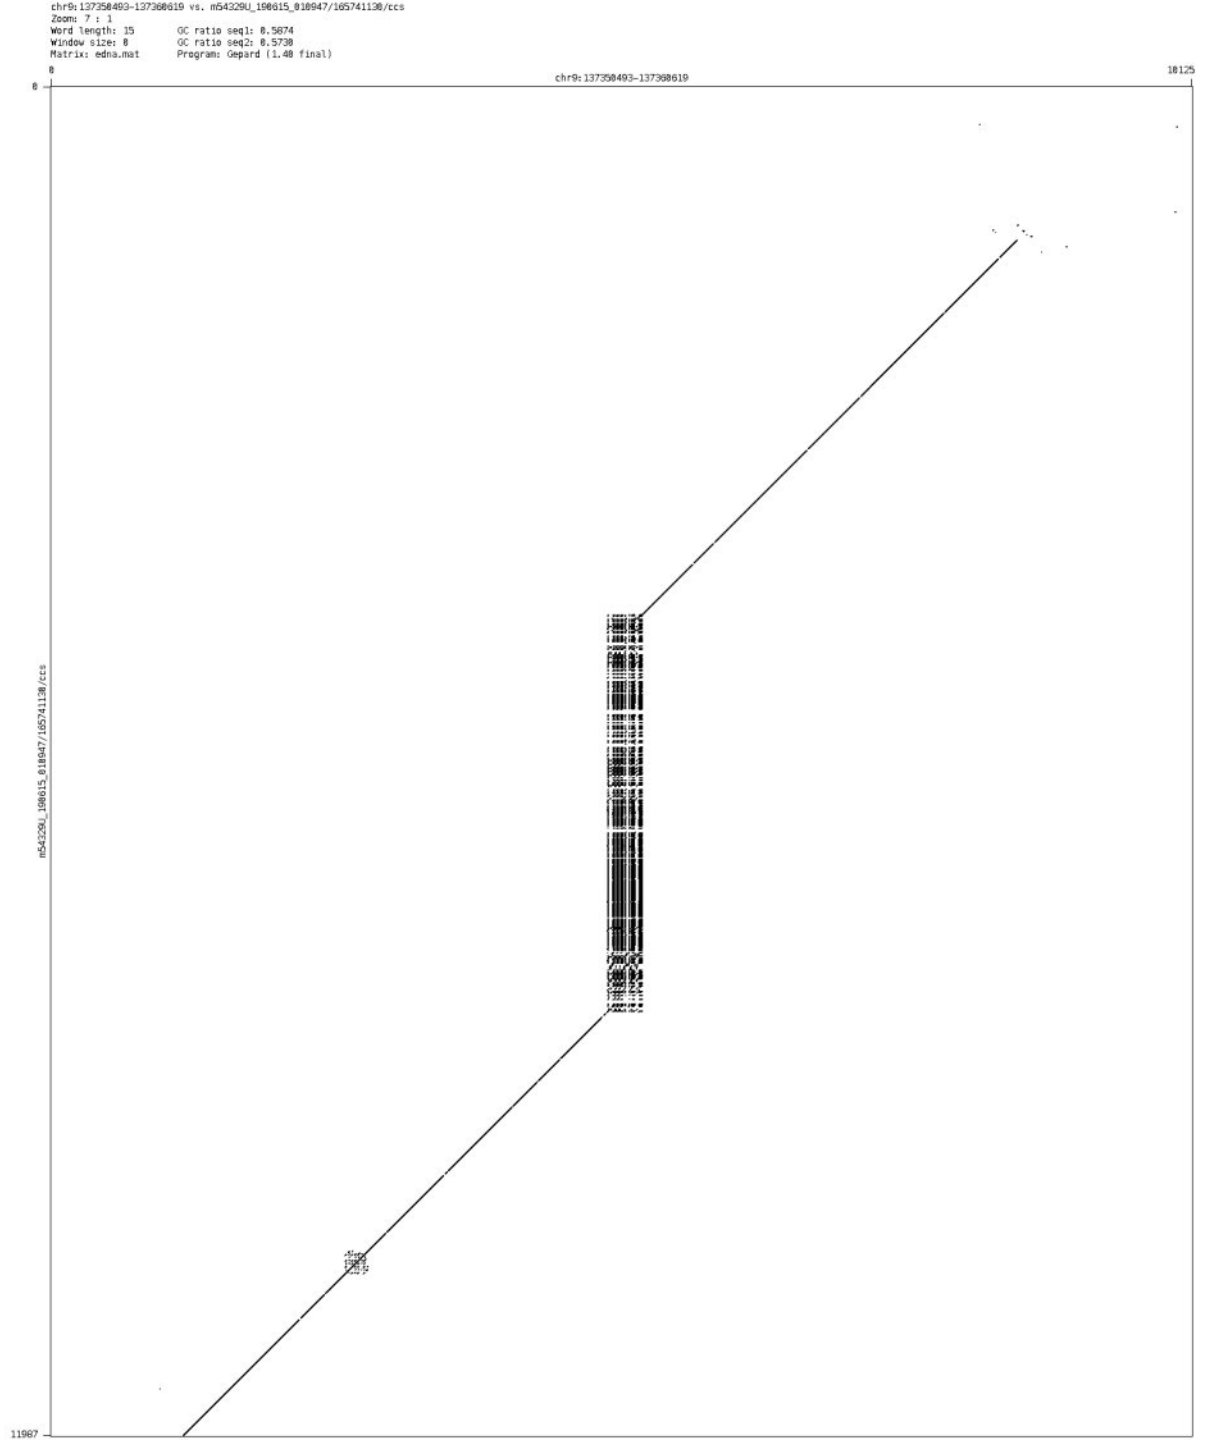

➤ chr9\_137503837\_137503947

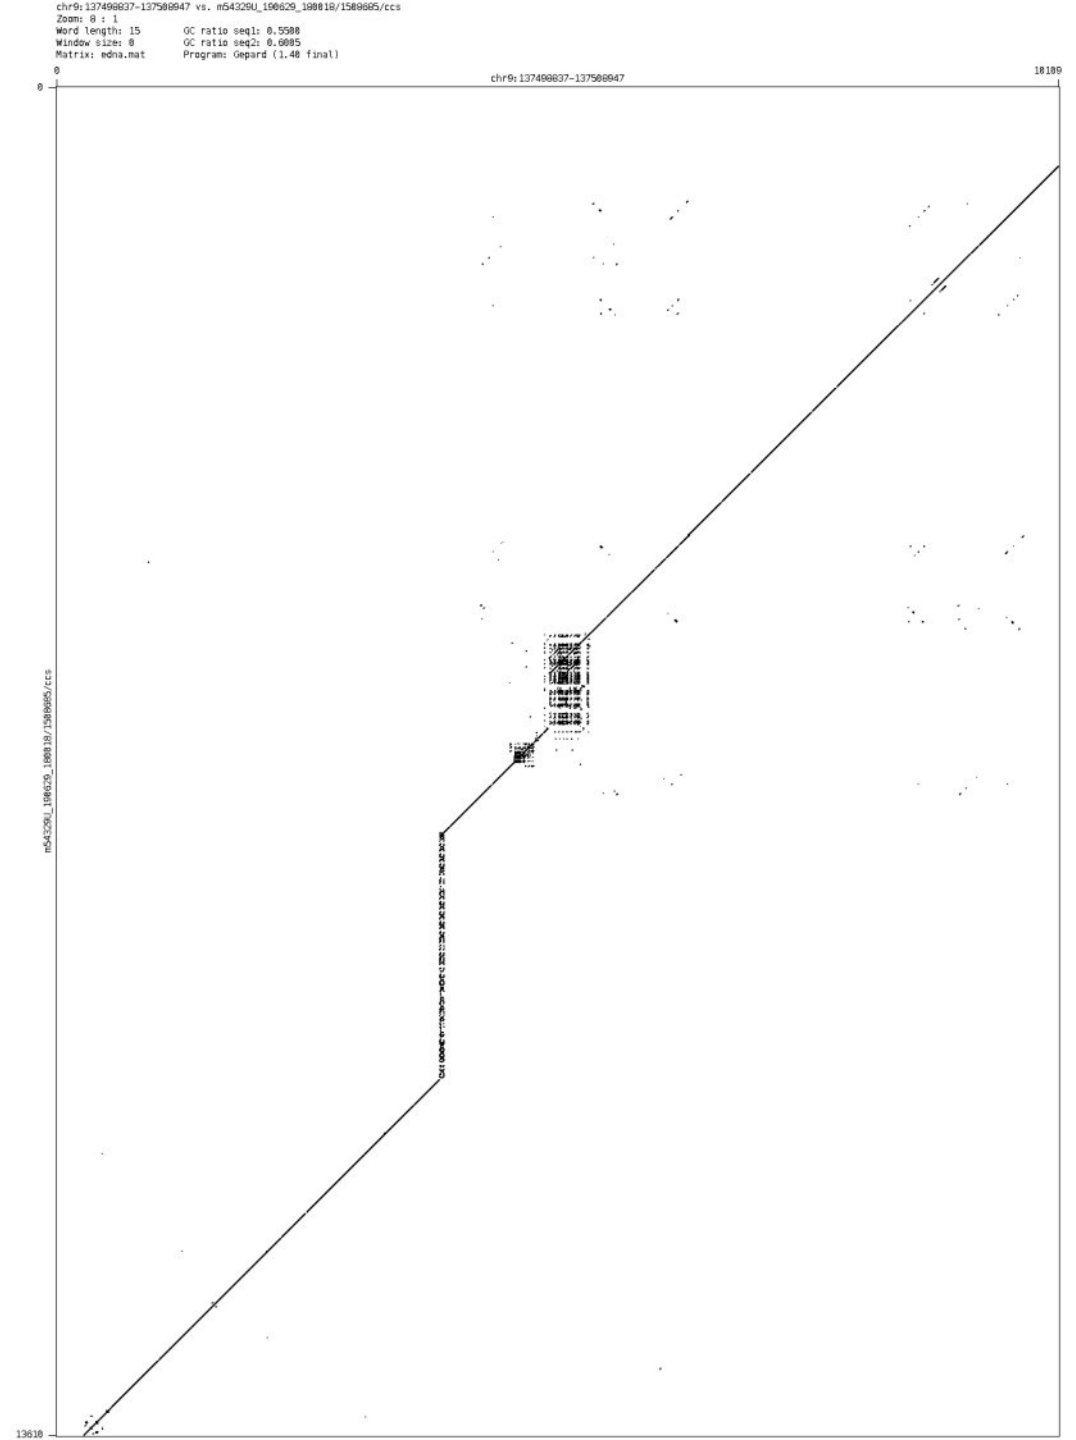

➤ chr9\_137518162\_137518324

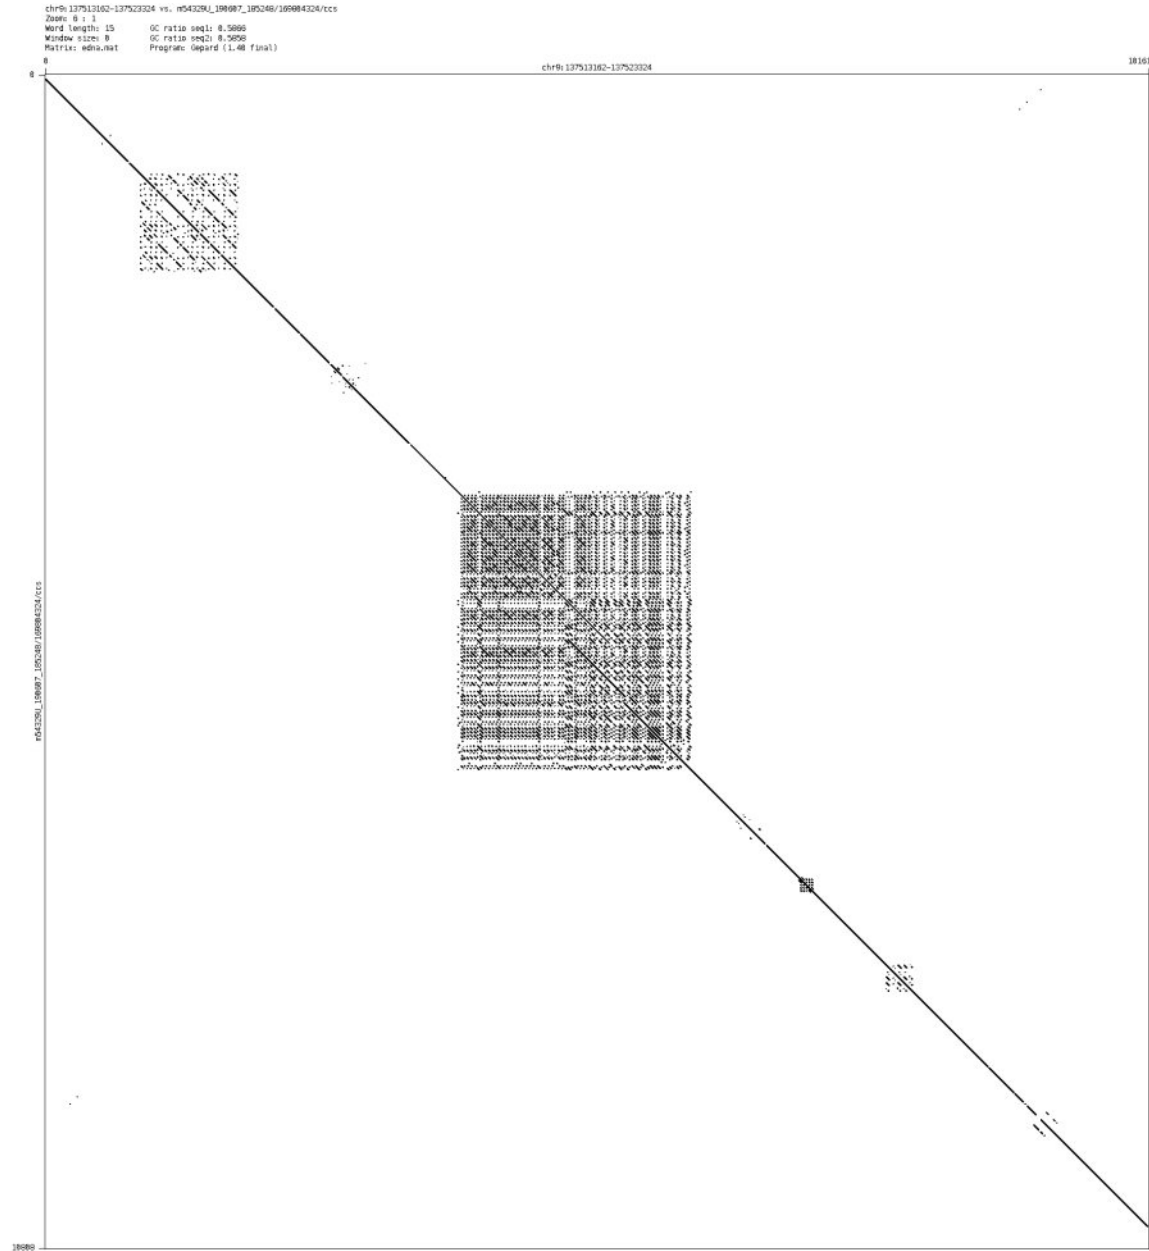

➤ chr9\_137669378\_137669456

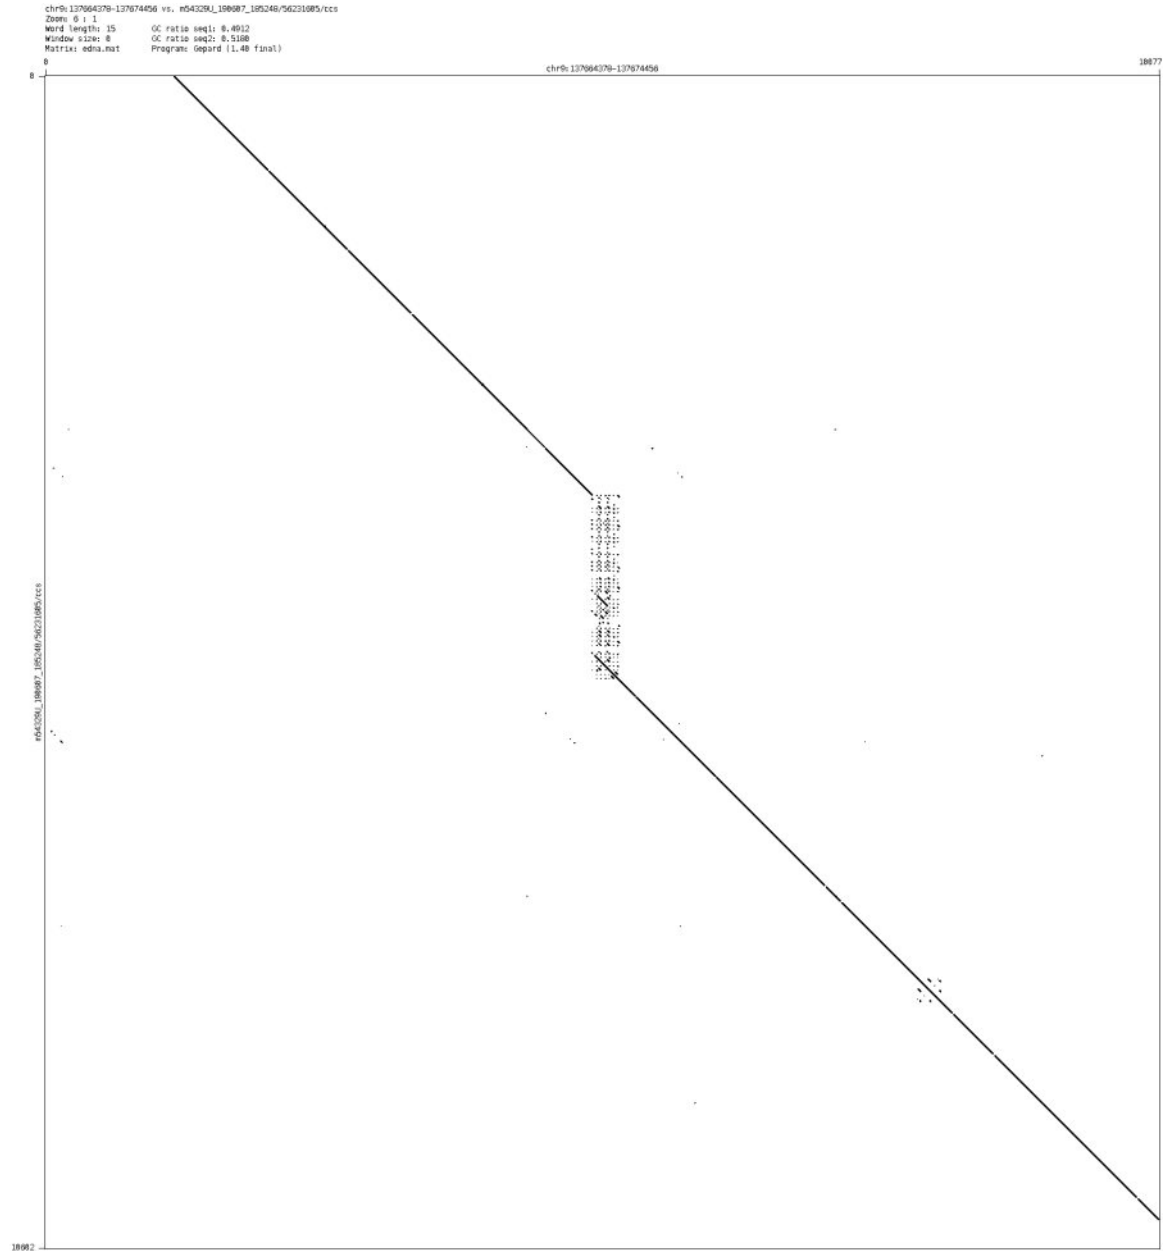

➤ chr10\_718255\_718429

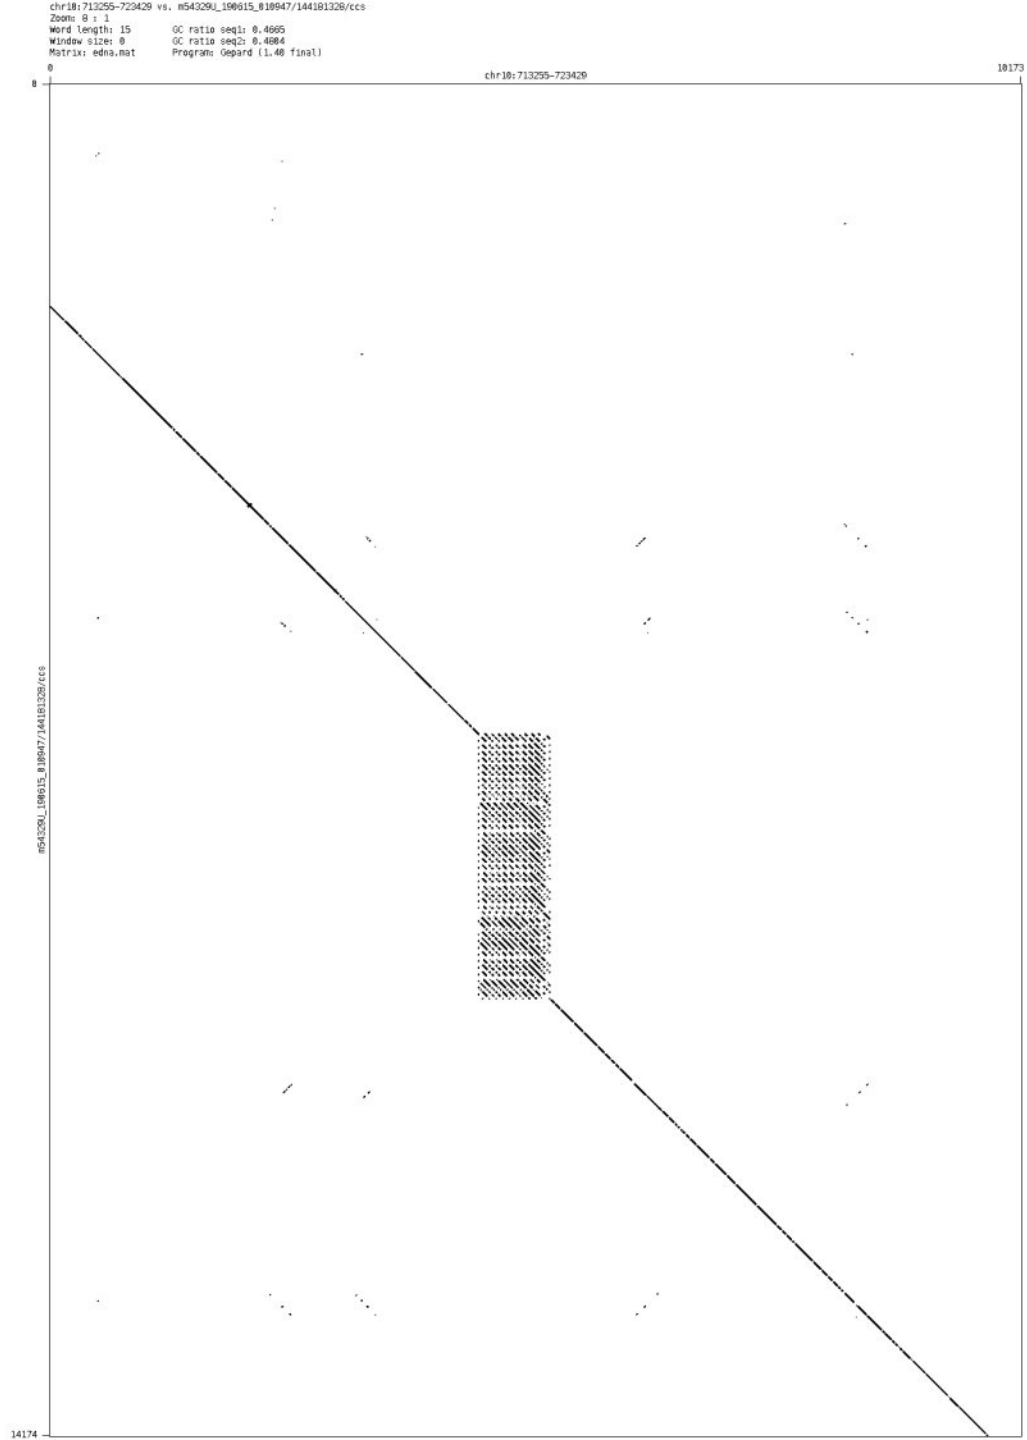

➤ chr10\_735885\_737771

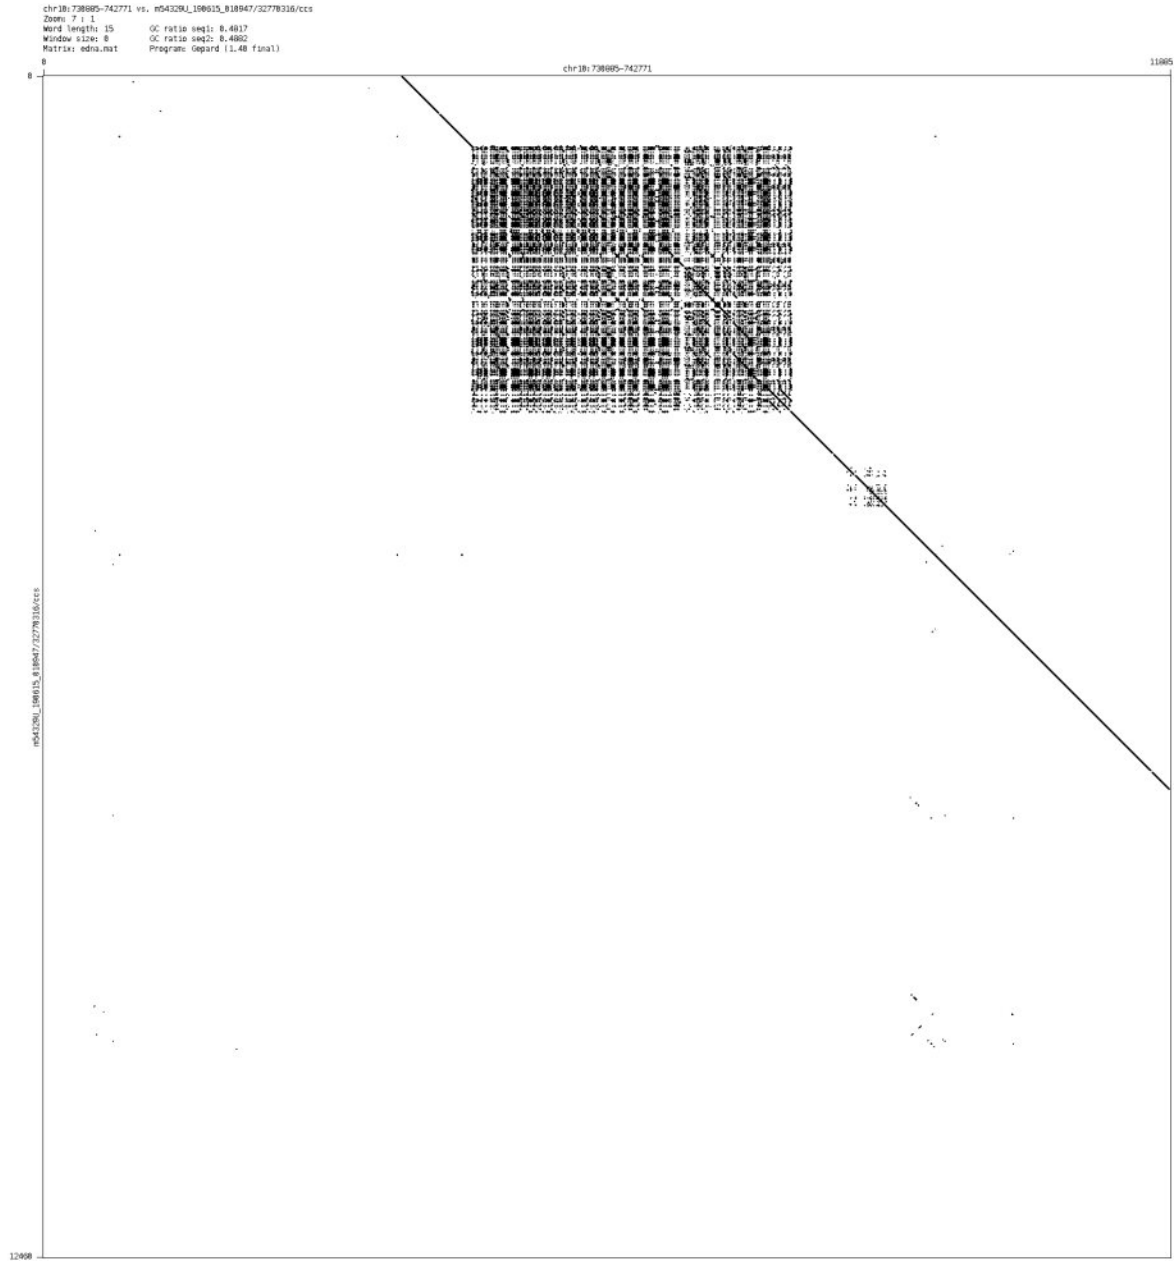



➤ chr10\_5381284\_5381363

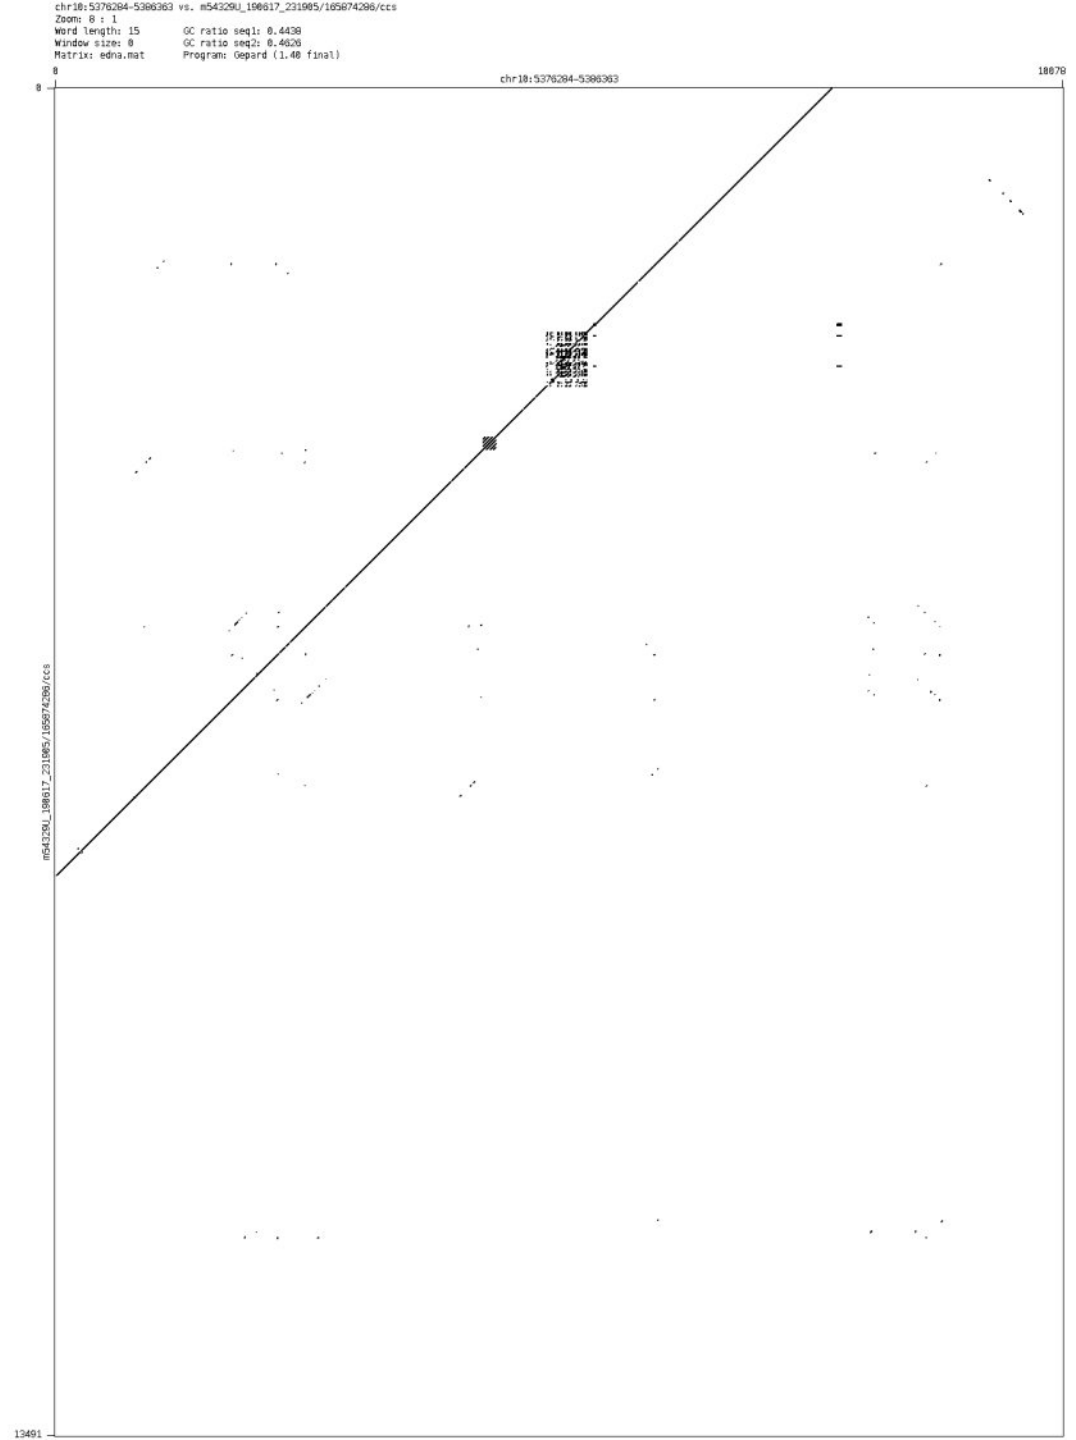

➤ chr10\_5577237\_5577333

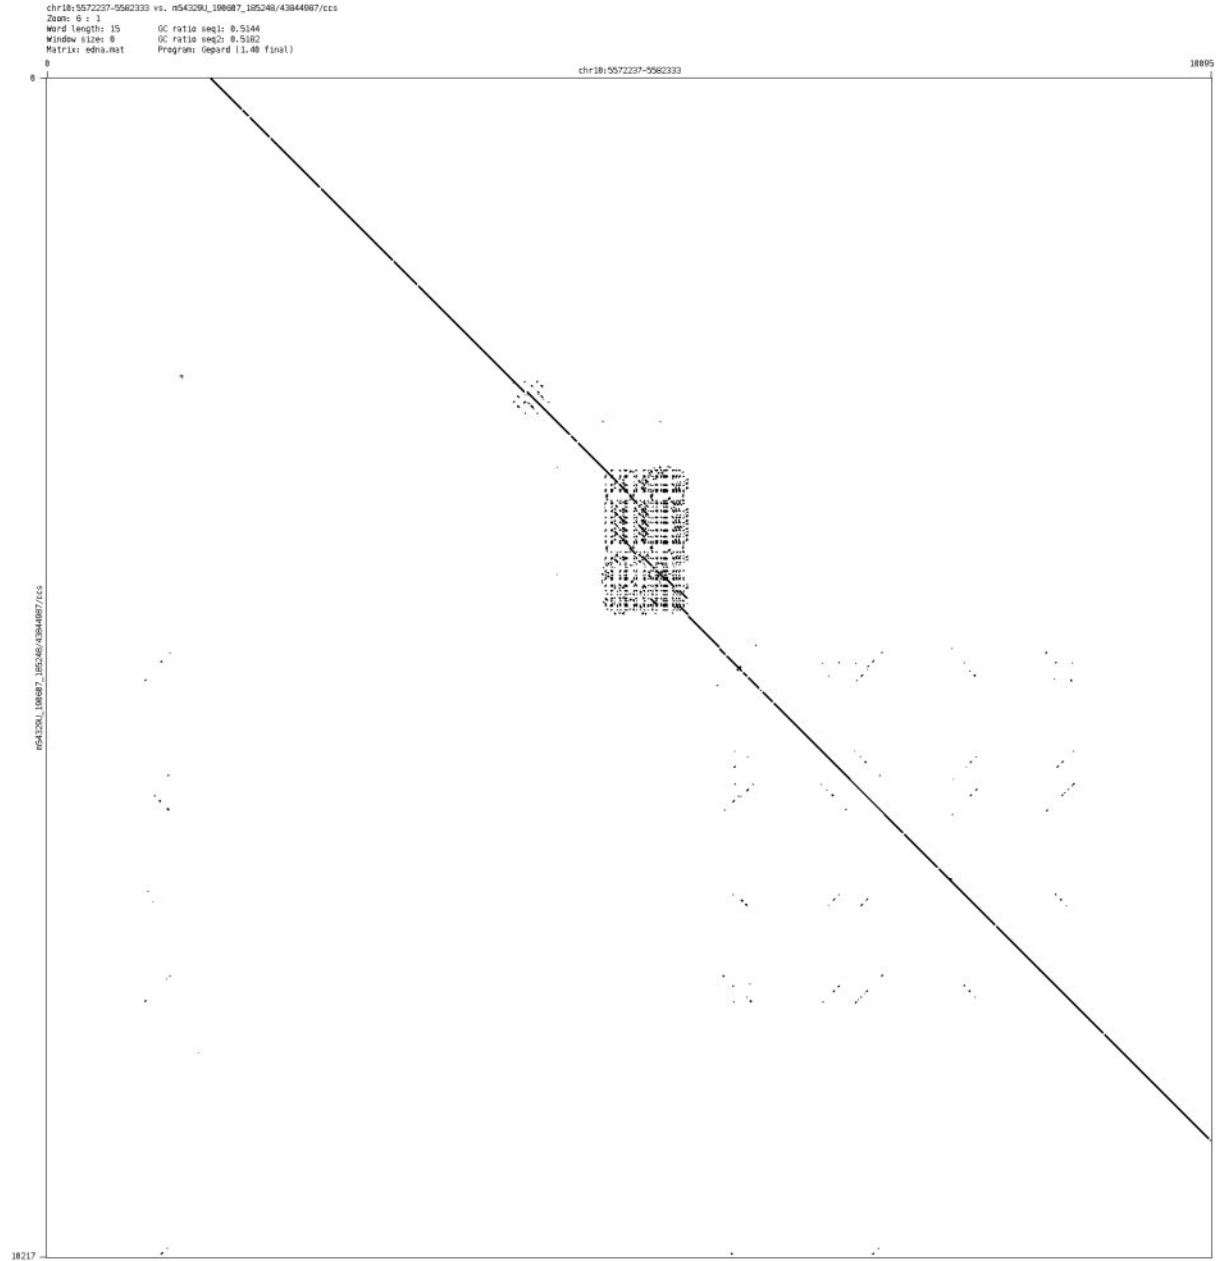

➤ chr10\_7526763\_7526835

chr10:7521763-7531835 vs. m54326J\_198887\_185248/137628373/cds  
Zoom: 8 : 1  
Word length: 15 GC ratio seq1: 8.4582  
Window size: 0 GC ratio seq2: 8.4354  
Matrix: edna.mat Program: gepard (1.48 final)

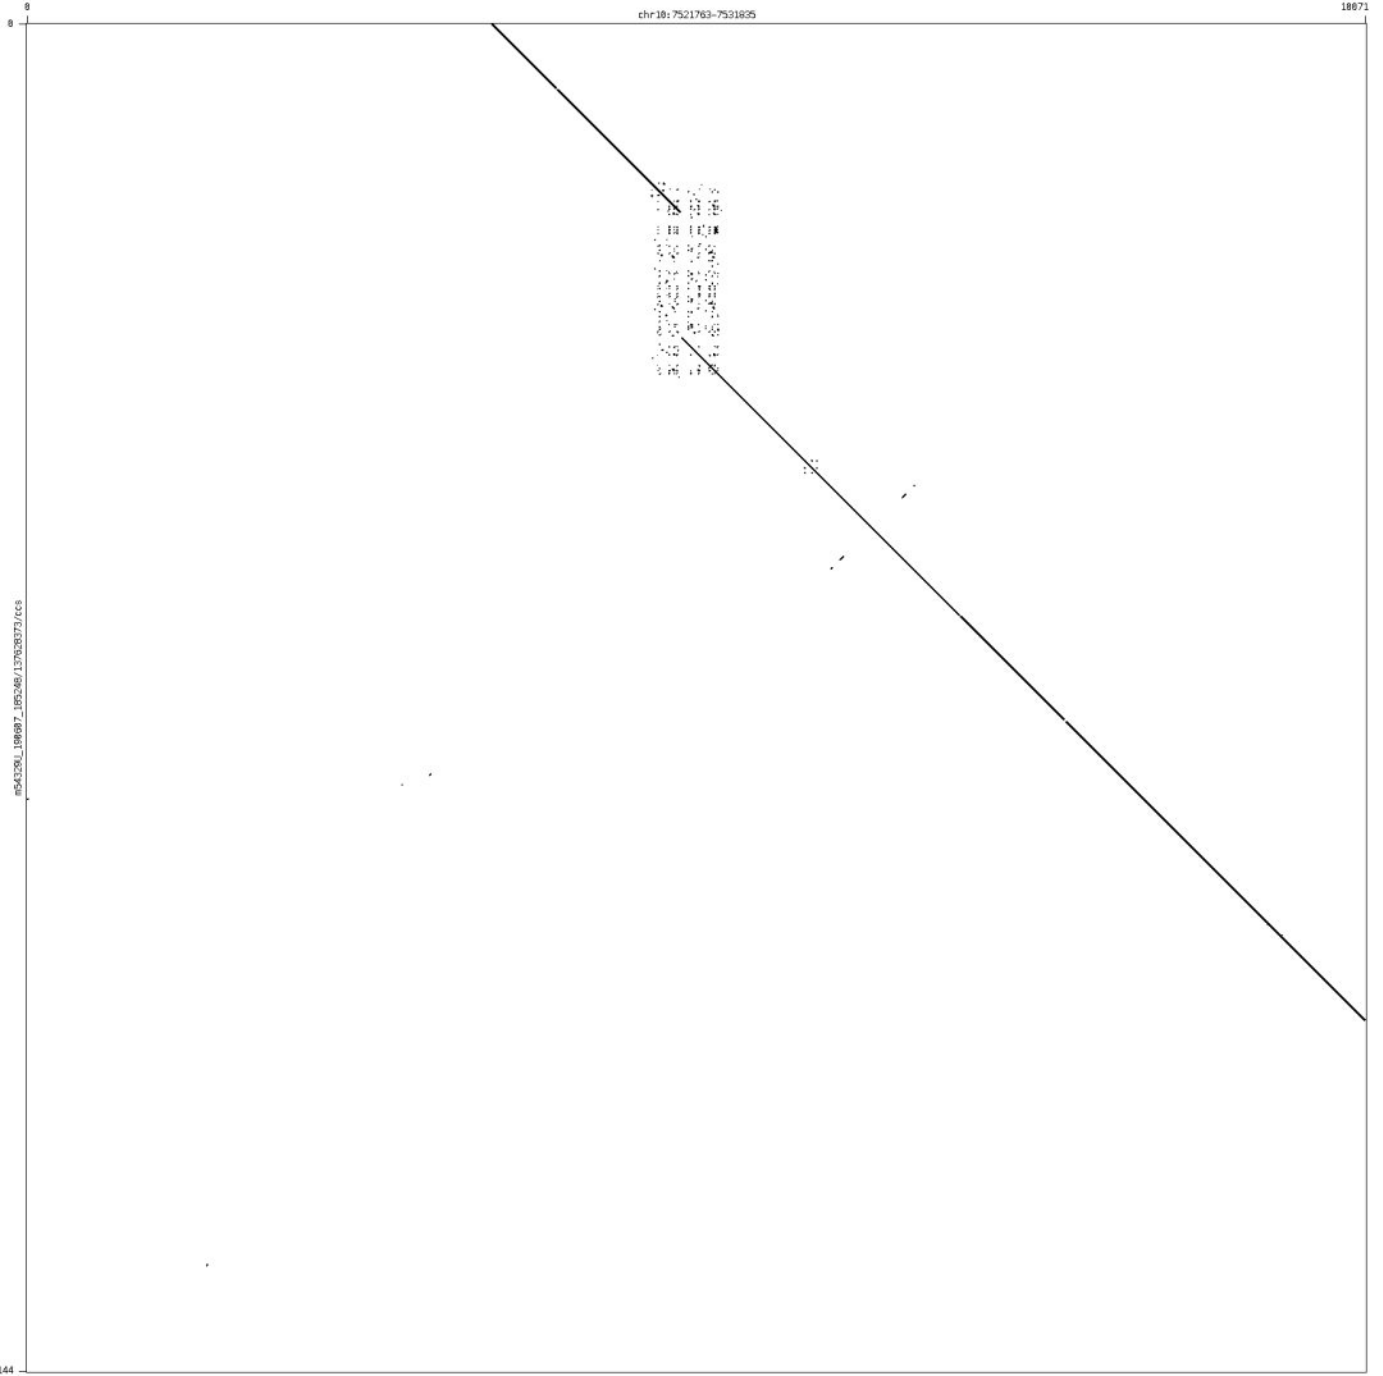

➤ chr10\_11283968\_11284497

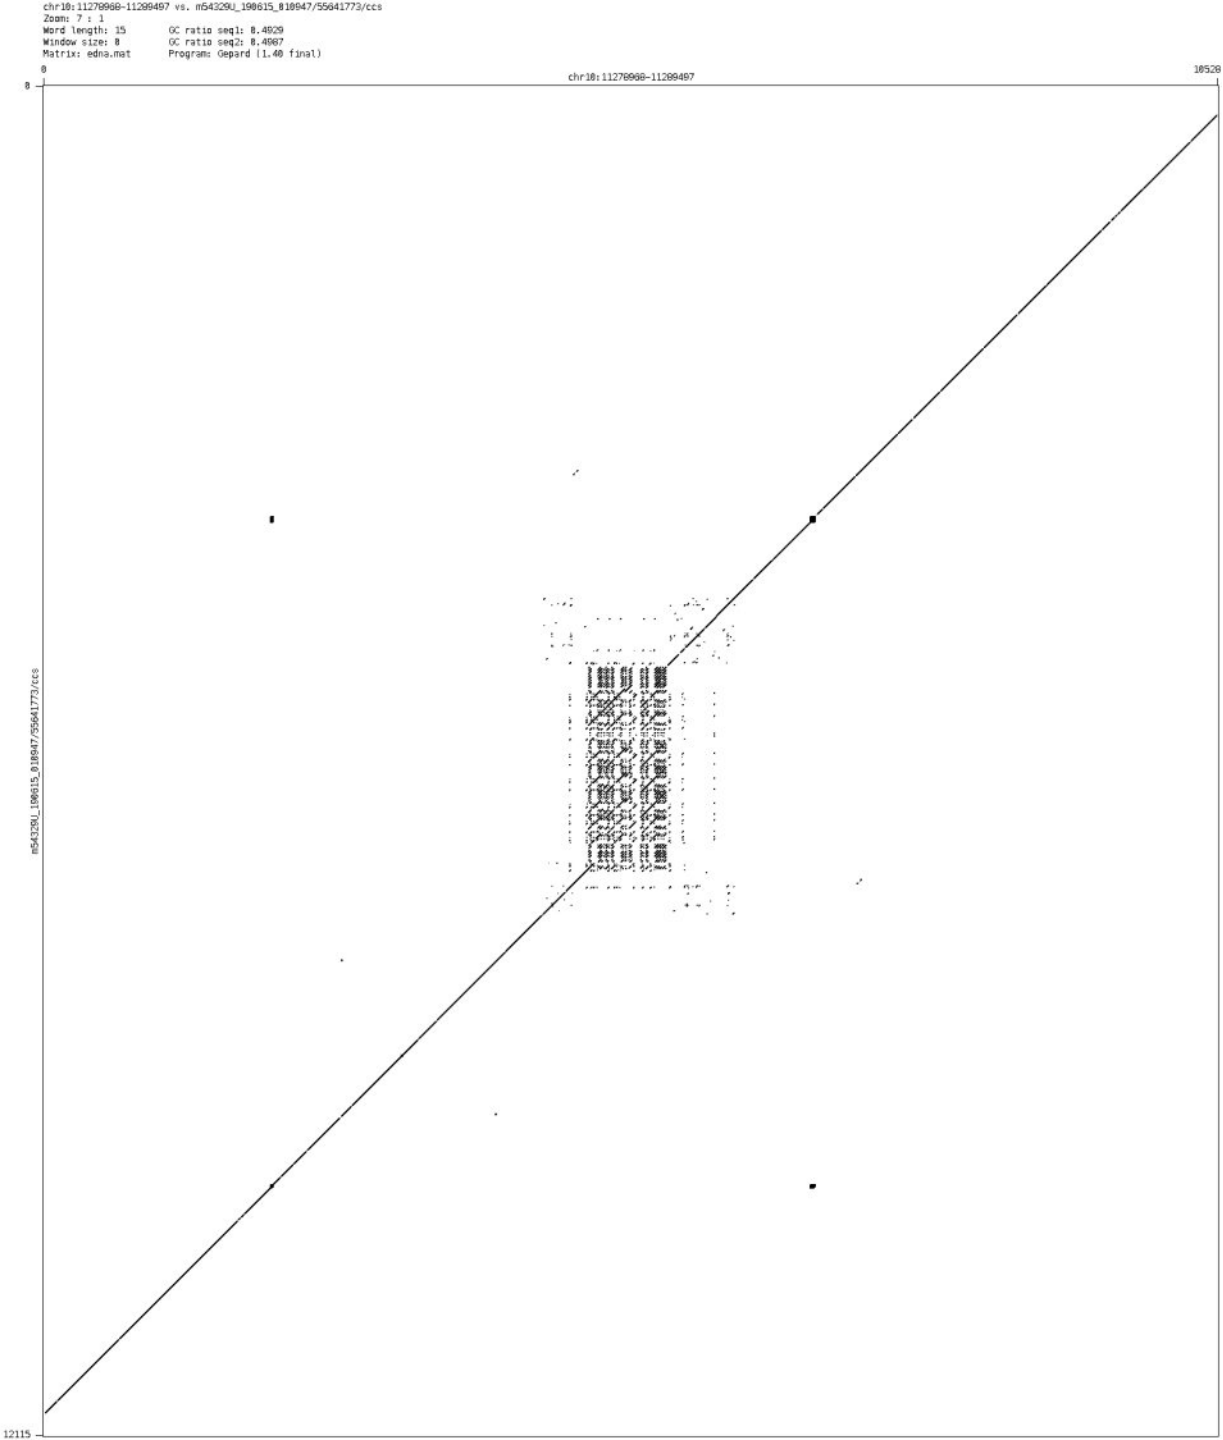

➤ chr10\_12413511\_12413590

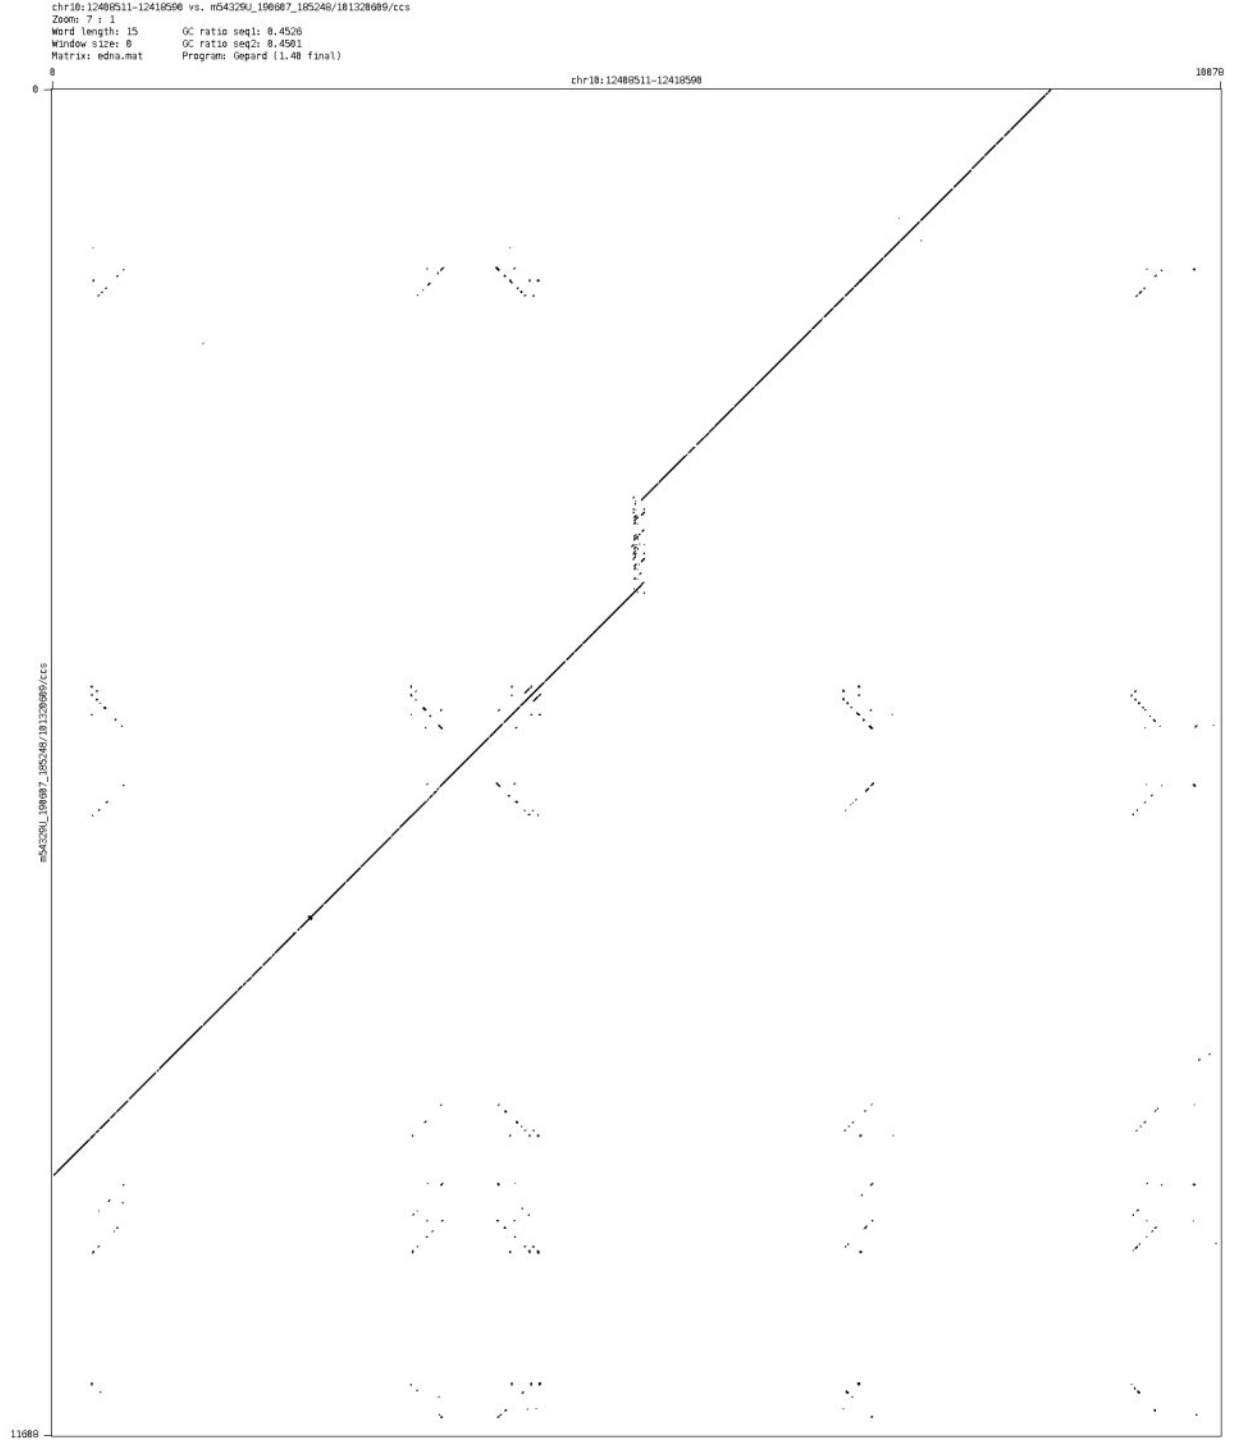

➤ chr10\_14568488\_14568677

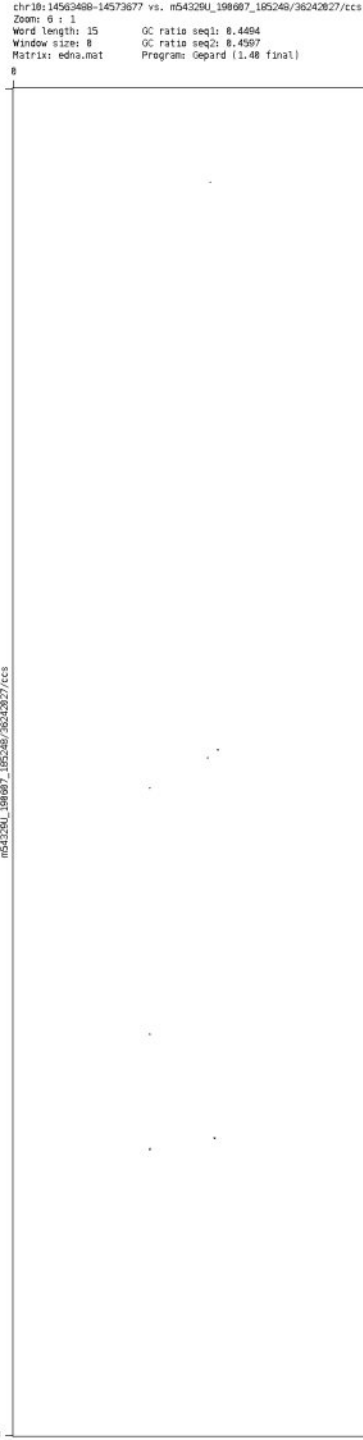

➤ chr10\_44927520\_44928982

chr10:44922520-44933982 vs. m54329U\_190607\_195248/09573656/ccs  
Zoom: 7 : 1  
Word length: 15 GC ratio seq1: 0.5279  
Window size: 0 GC ratio seq2: 0.5375  
Matrix: edna.mat Program: Oepard (1.40 final)

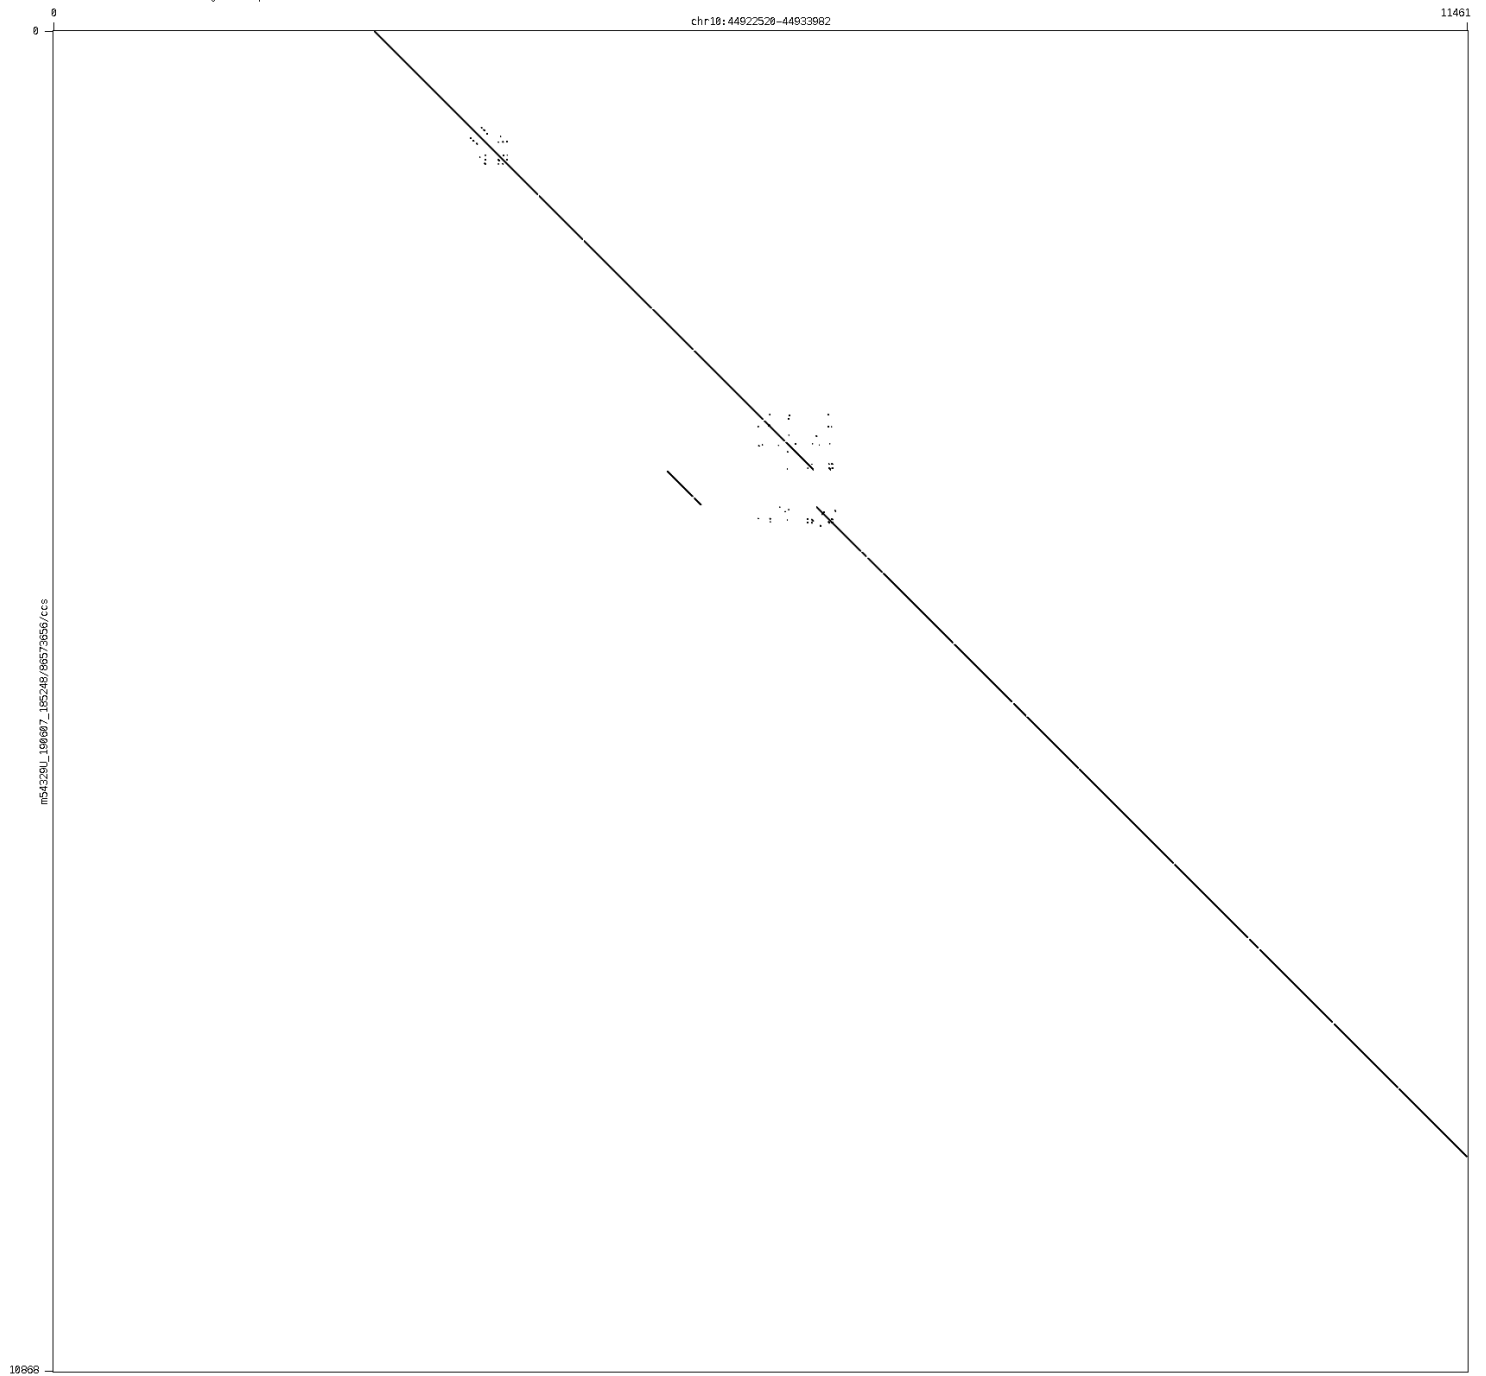

➤ chr10\_57496913\_57498588

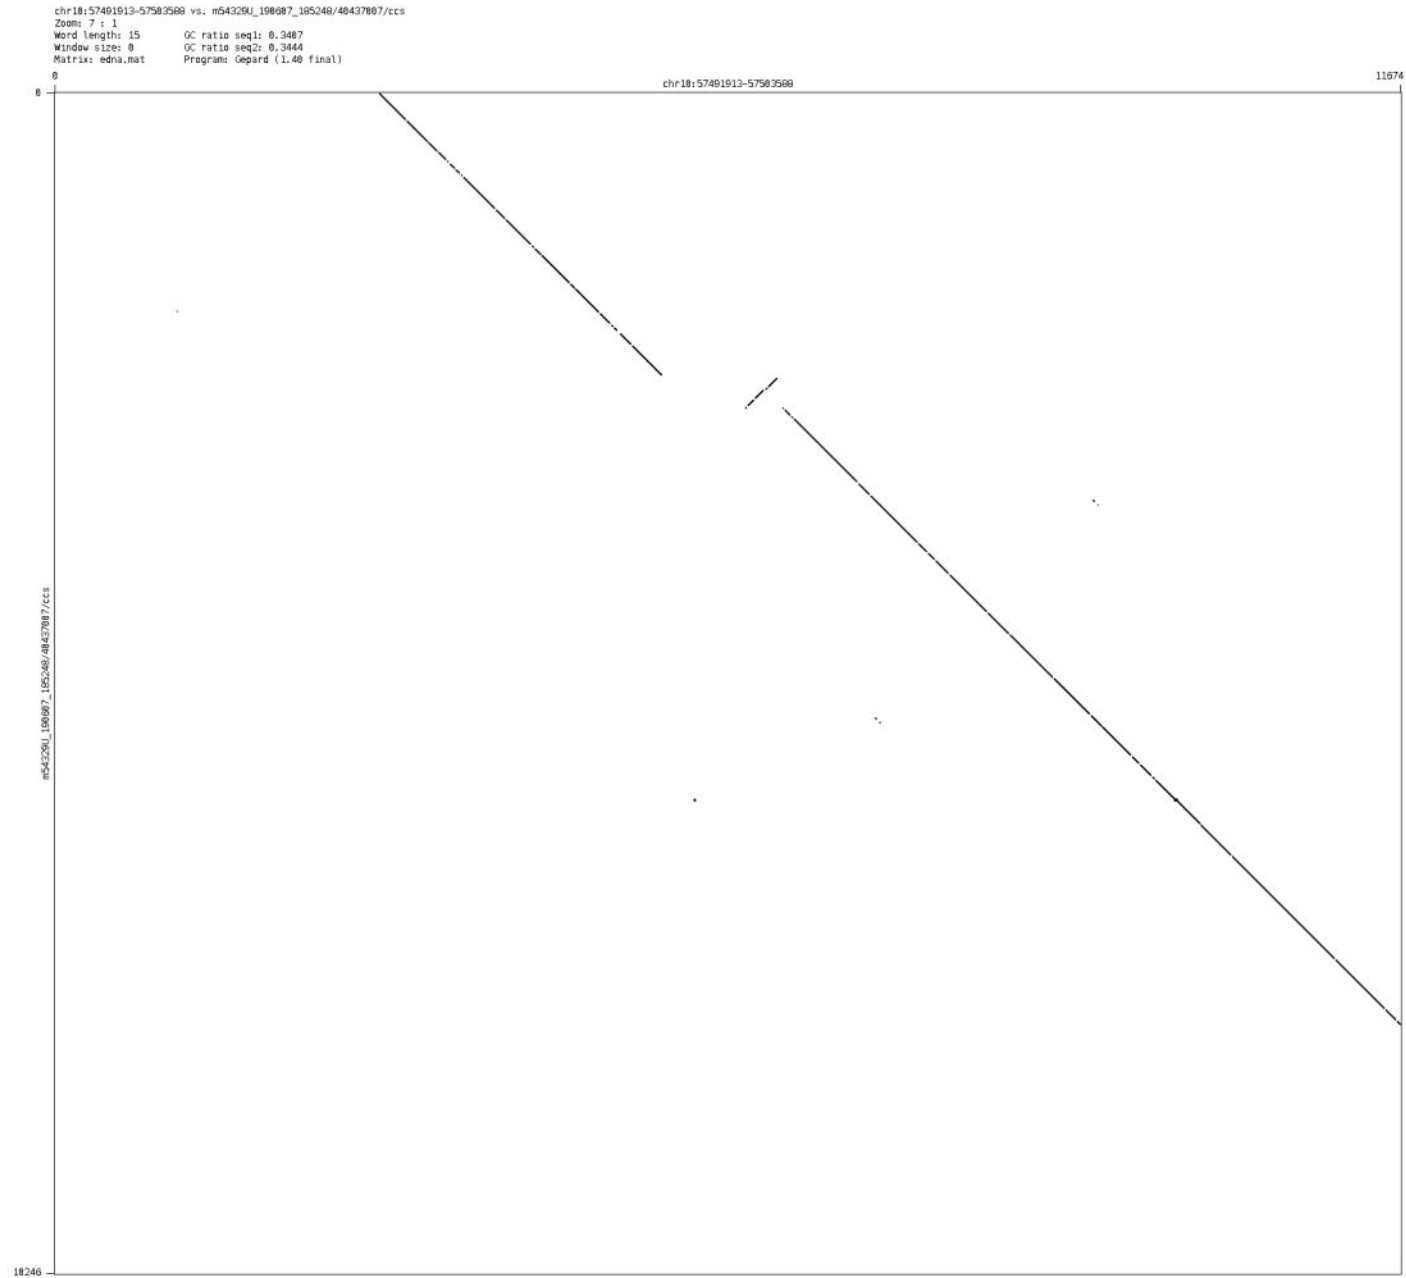



➤ chr10\_60469258\_60469364

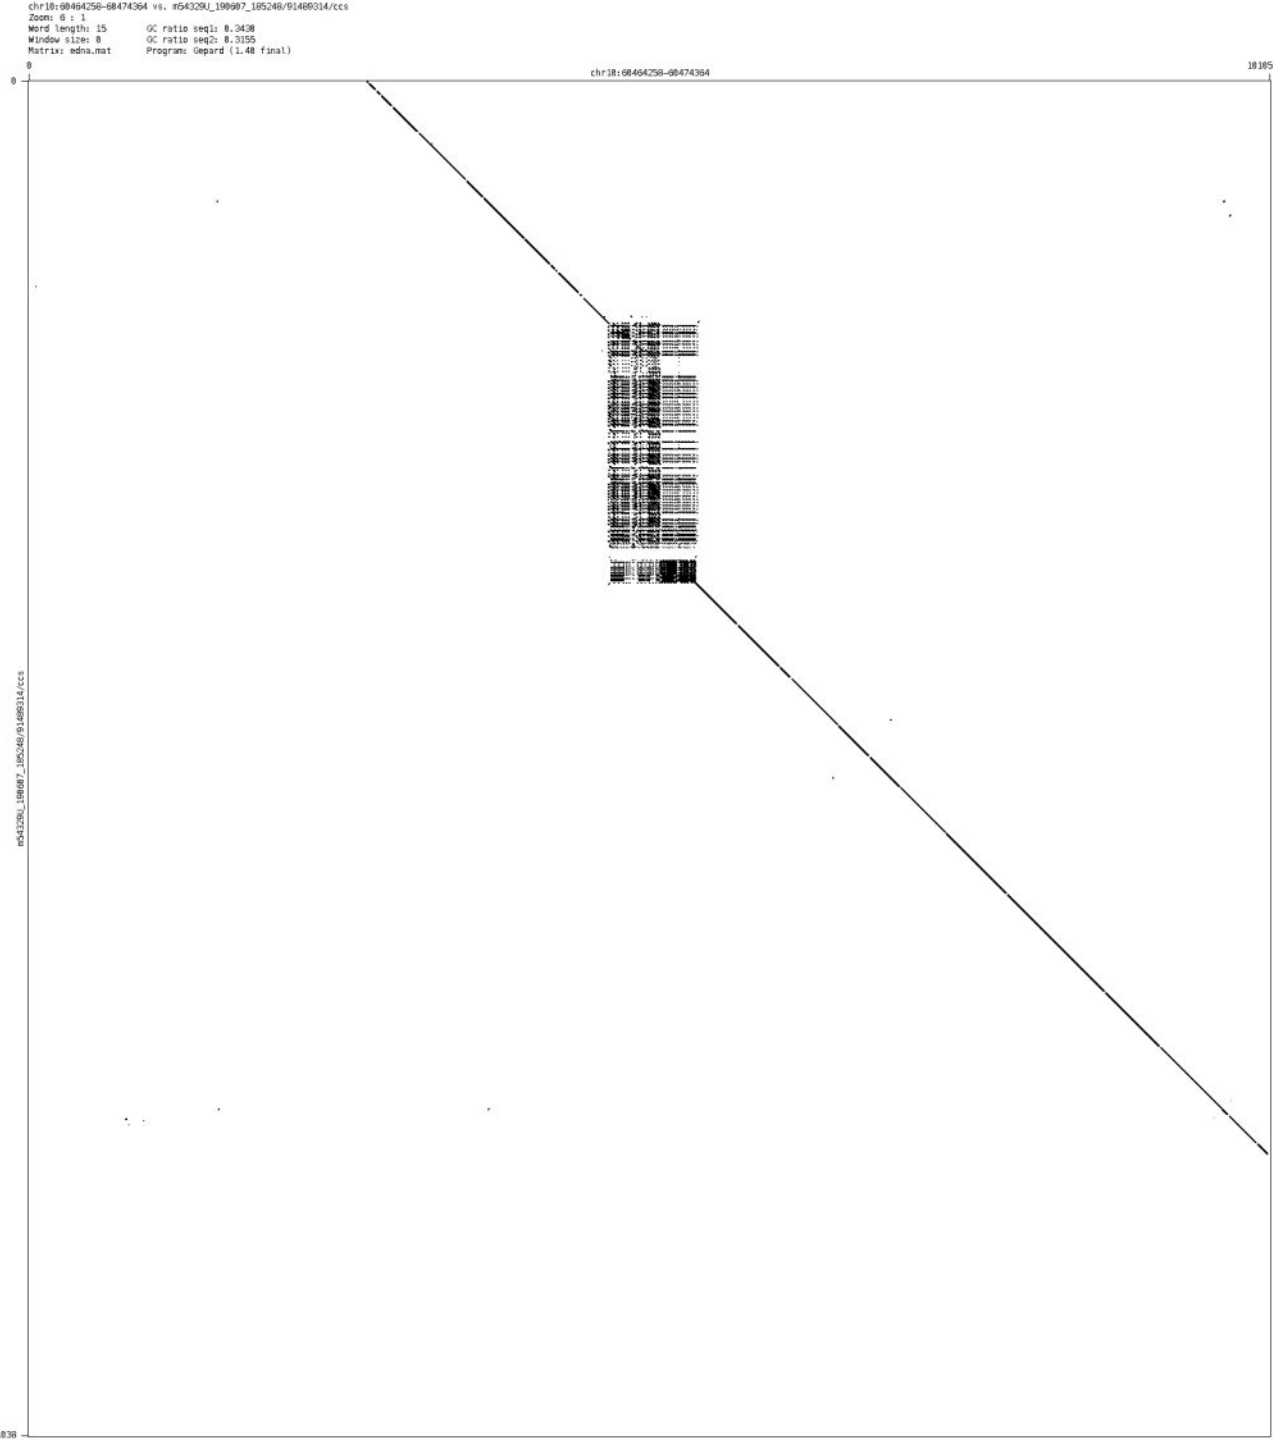

➤ chr10\_95447029\_95448567

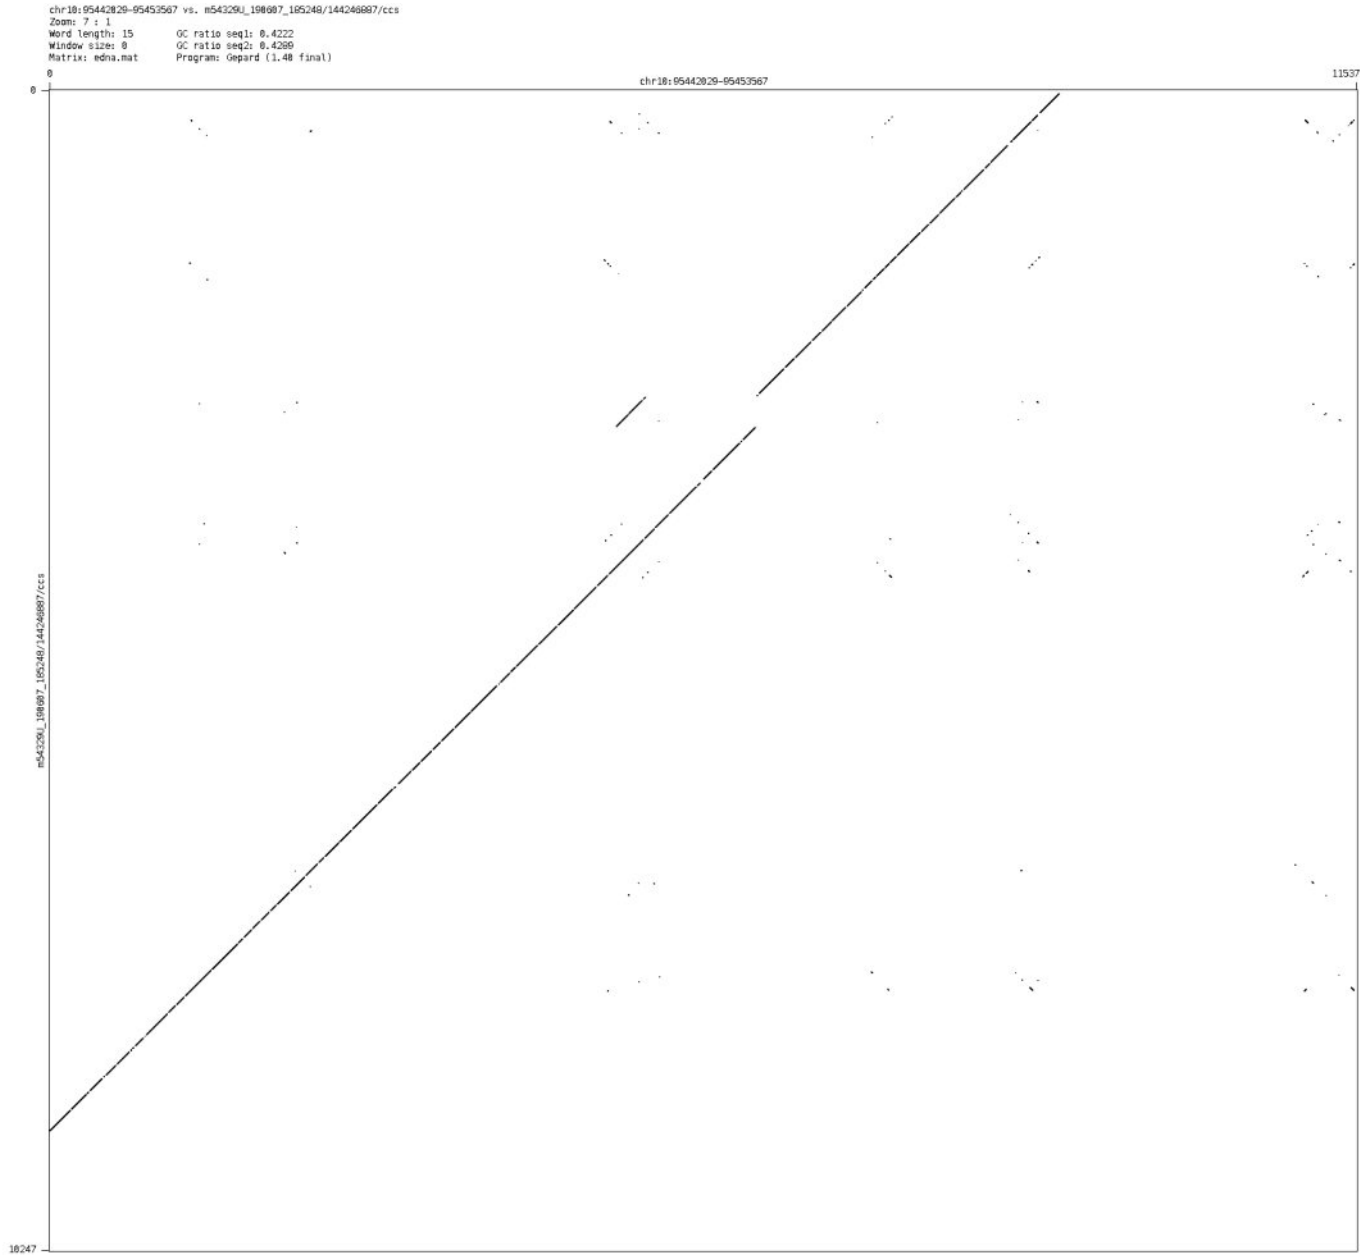

➤ chr10\_123254394\_123255170

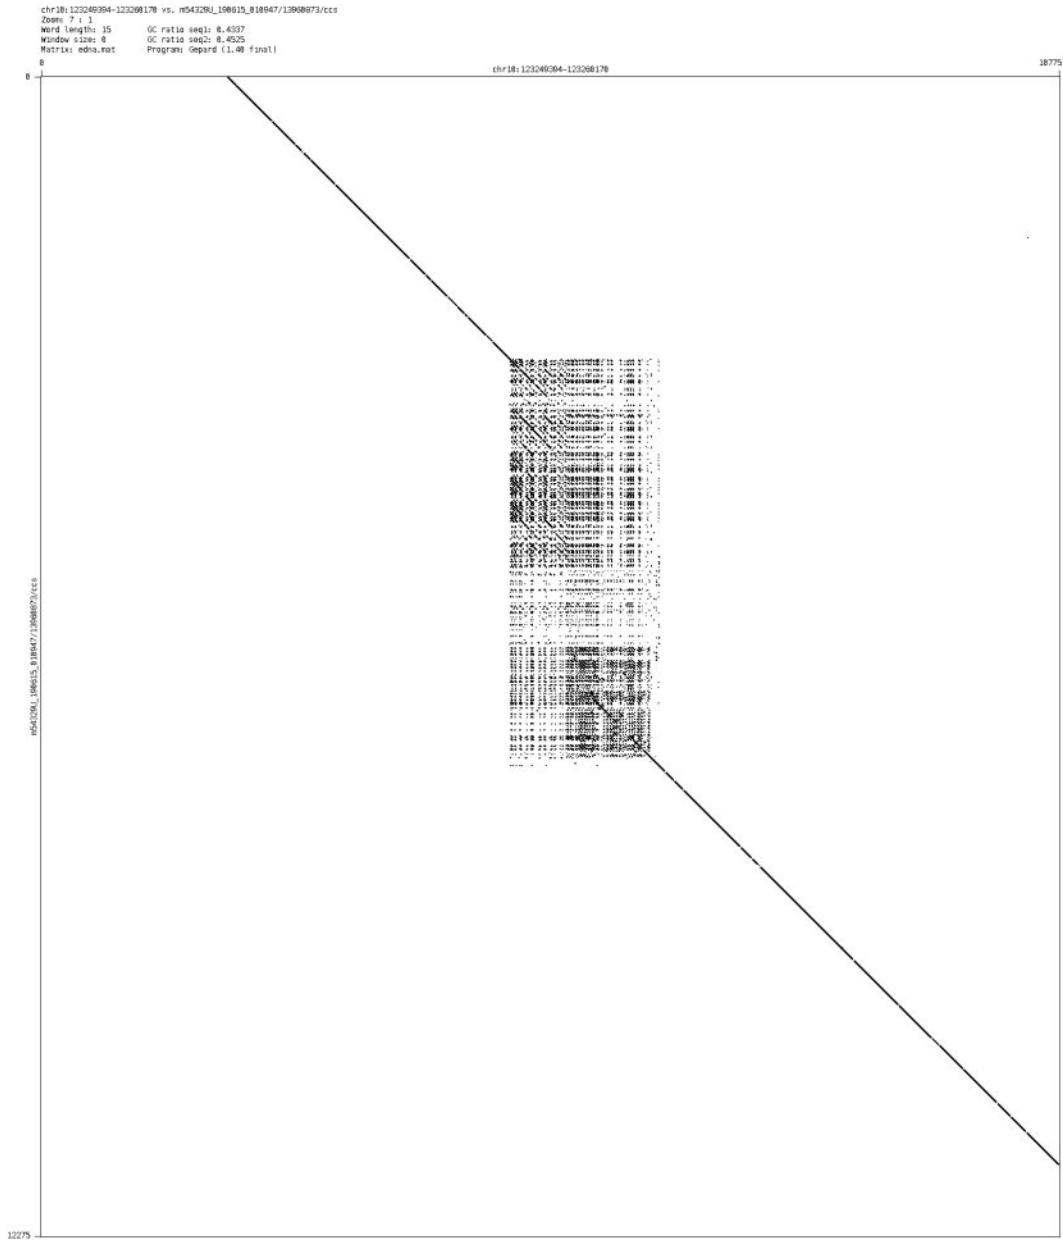

➤ chr10\_124227125\_124227273

chr10:124222125-124232273 vs. n543290\_160615\_010947/739902077/ccs

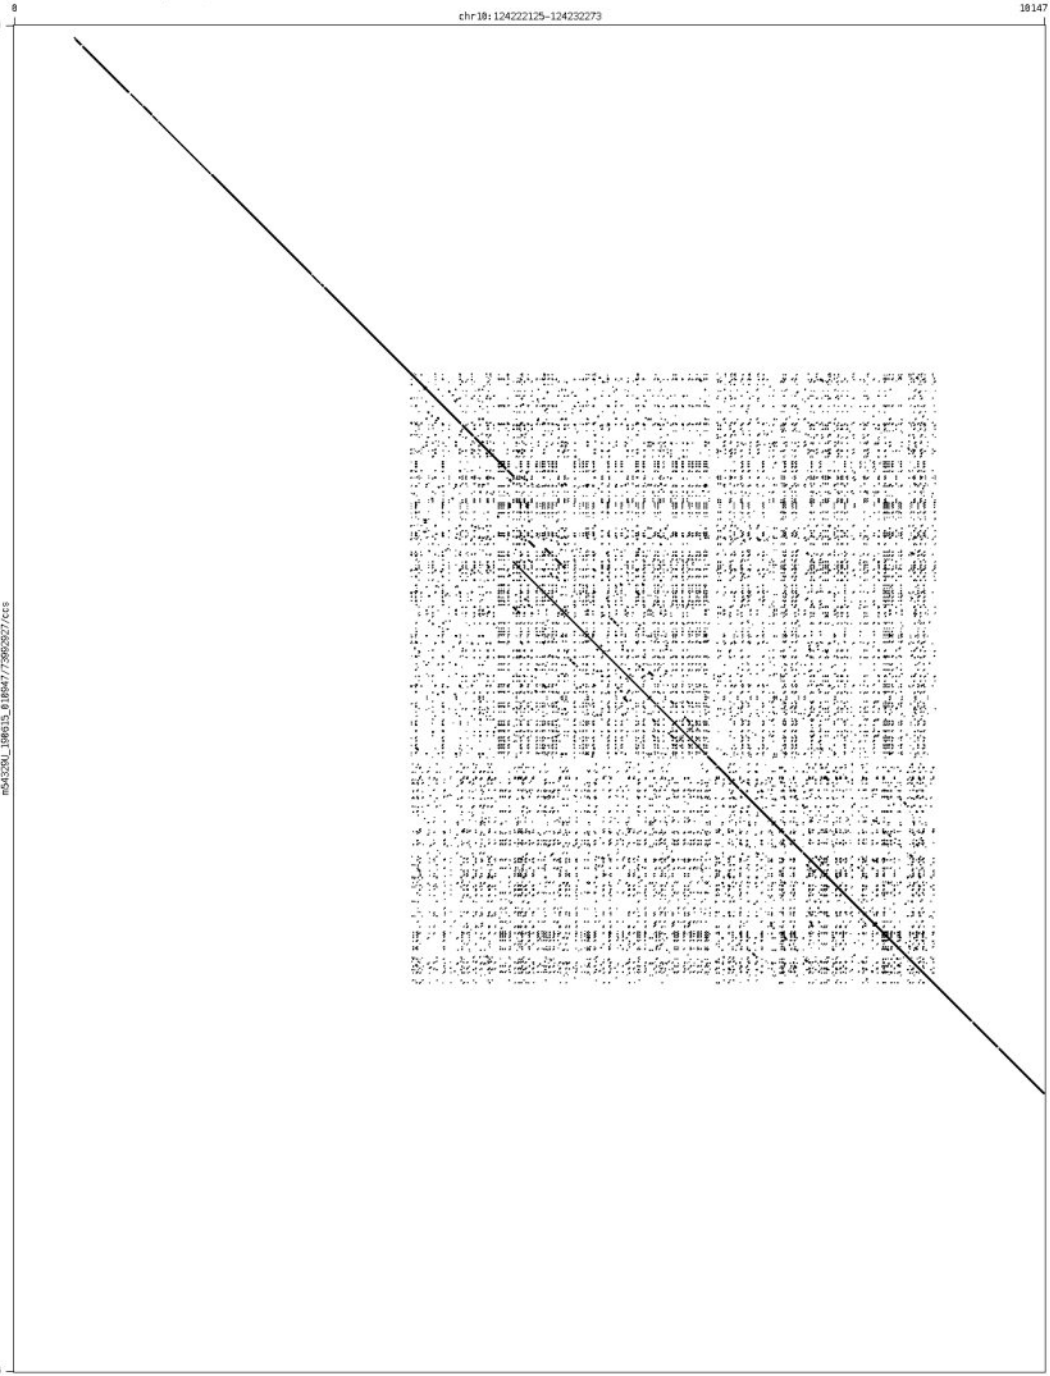

➤ chr10\_125501894\_125512533

chr10:125496894-125517533 vs. m54329U\_190607\_185248/39519659/ccs  
Zoom: 11 : 1  
Word length: 15 GC ratio seq1: 0.4232  
Window size: 0 GC ratio seq2: 0.4210  
Matrix: edna.mat Program: Gepard (1.48 final)

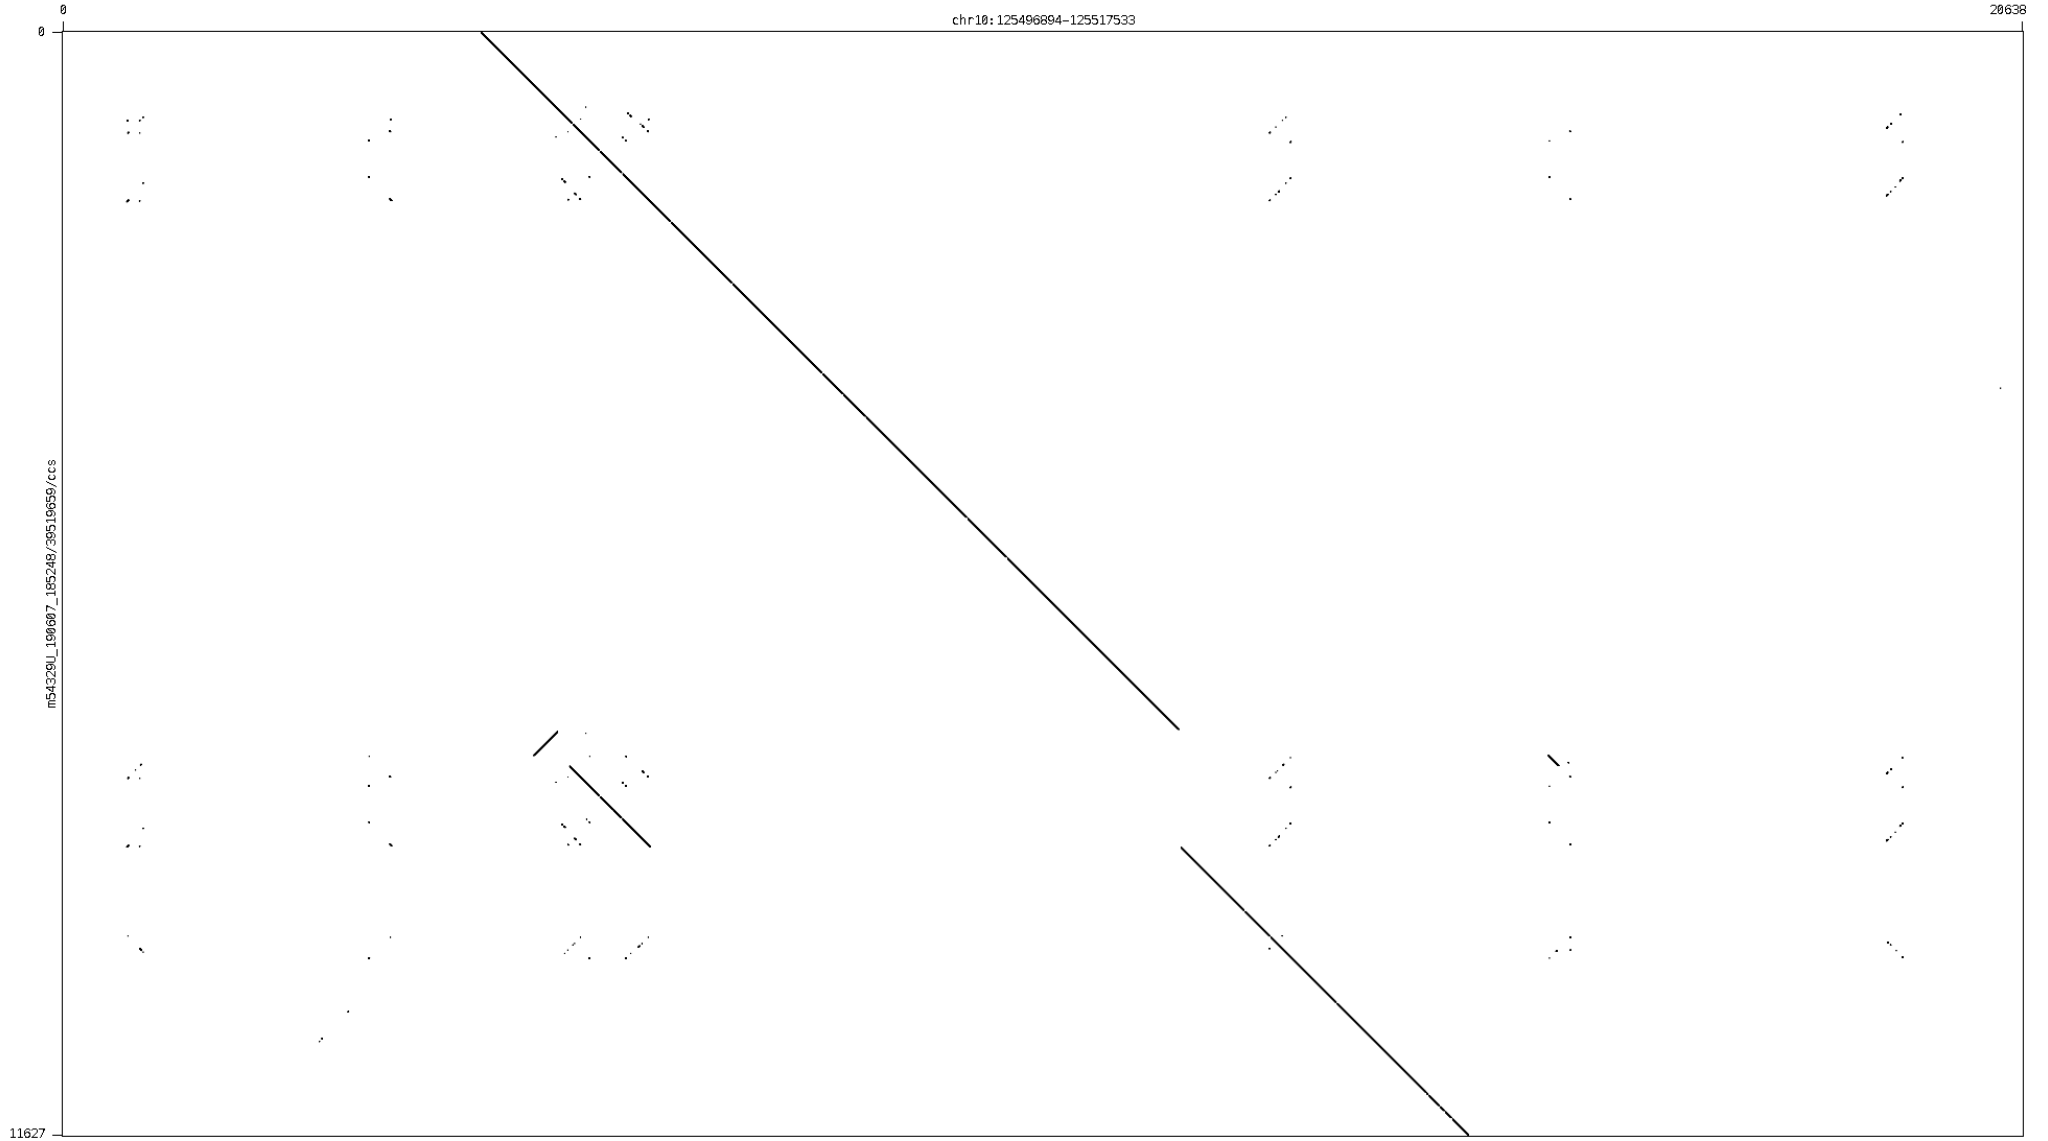

➤ chr10\_127797498\_127797602

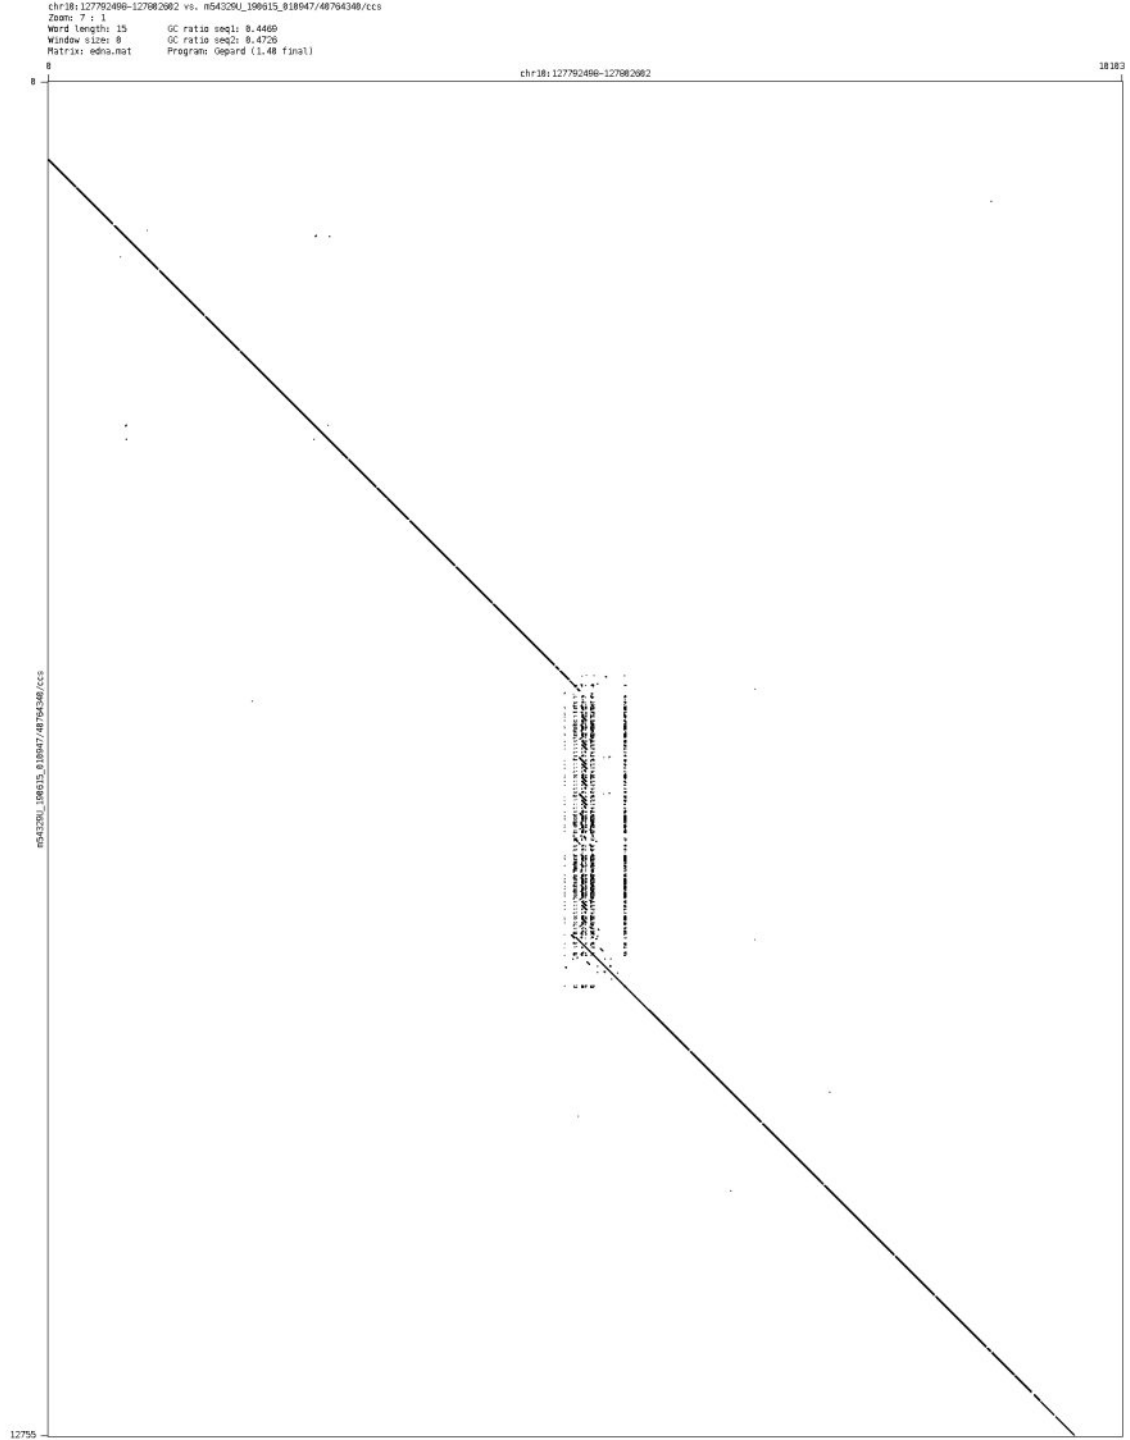

➤ chr10\_128464484\_128464594

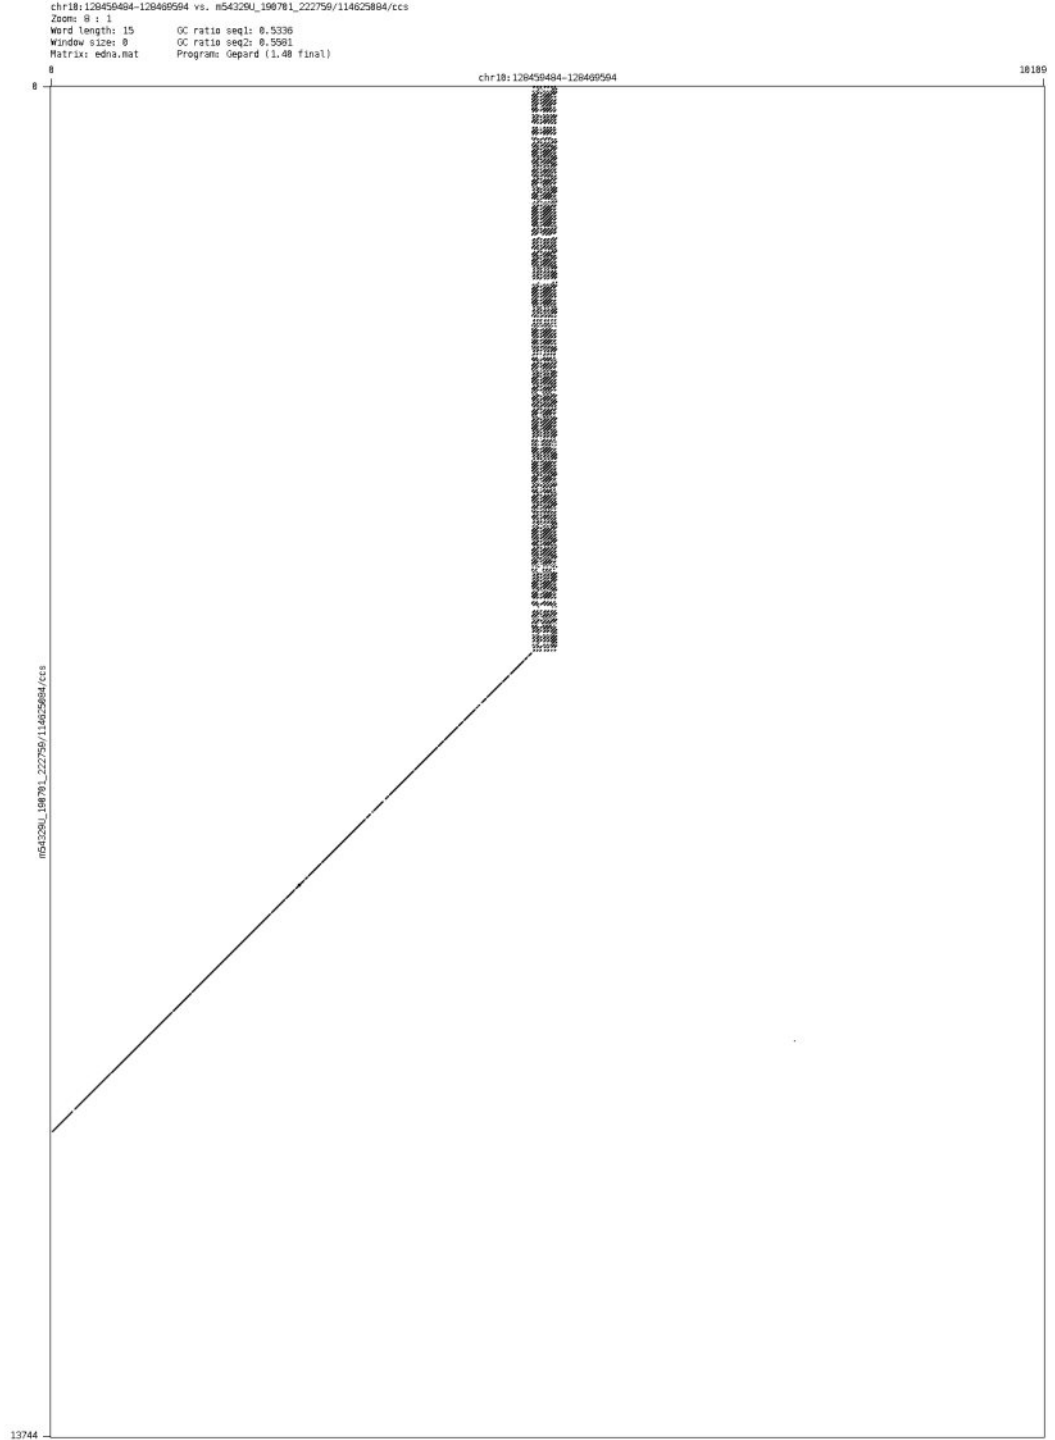

➤ chr10\_130790080\_130790697

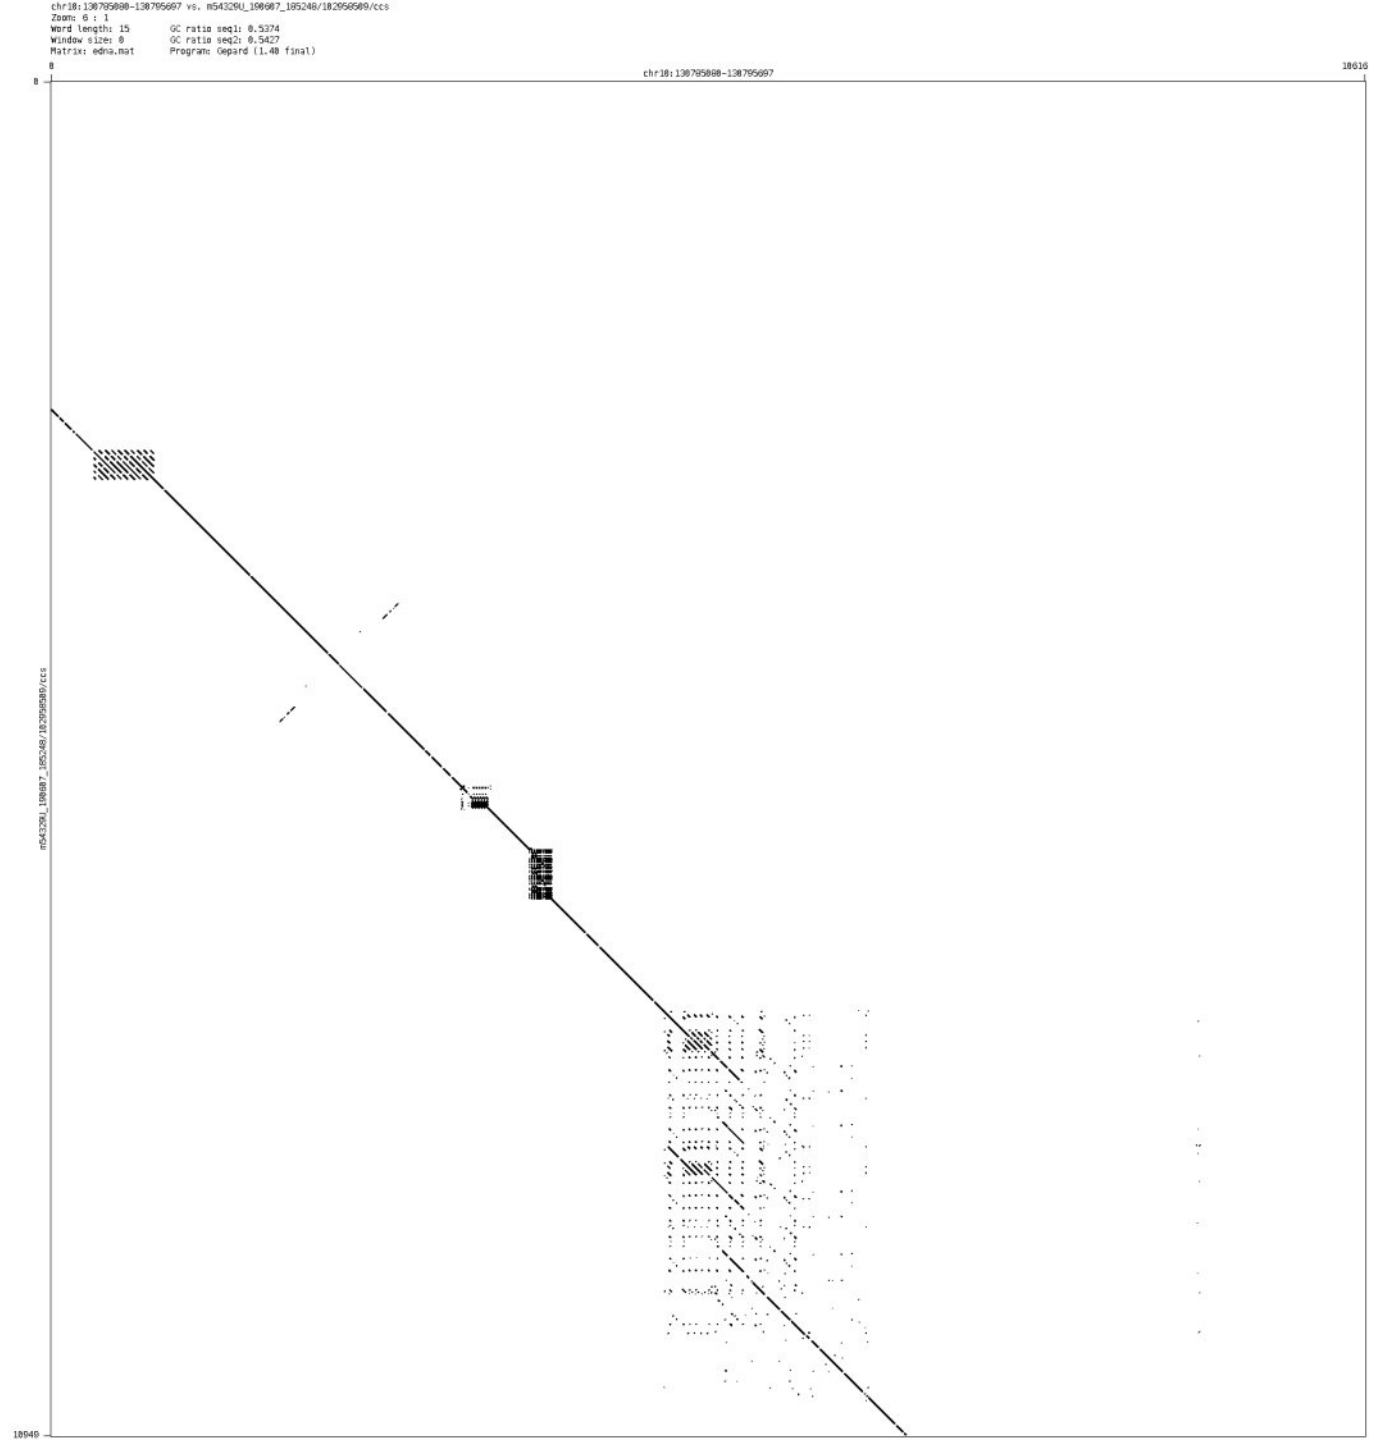



➤ chr10\_131176490\_131176898

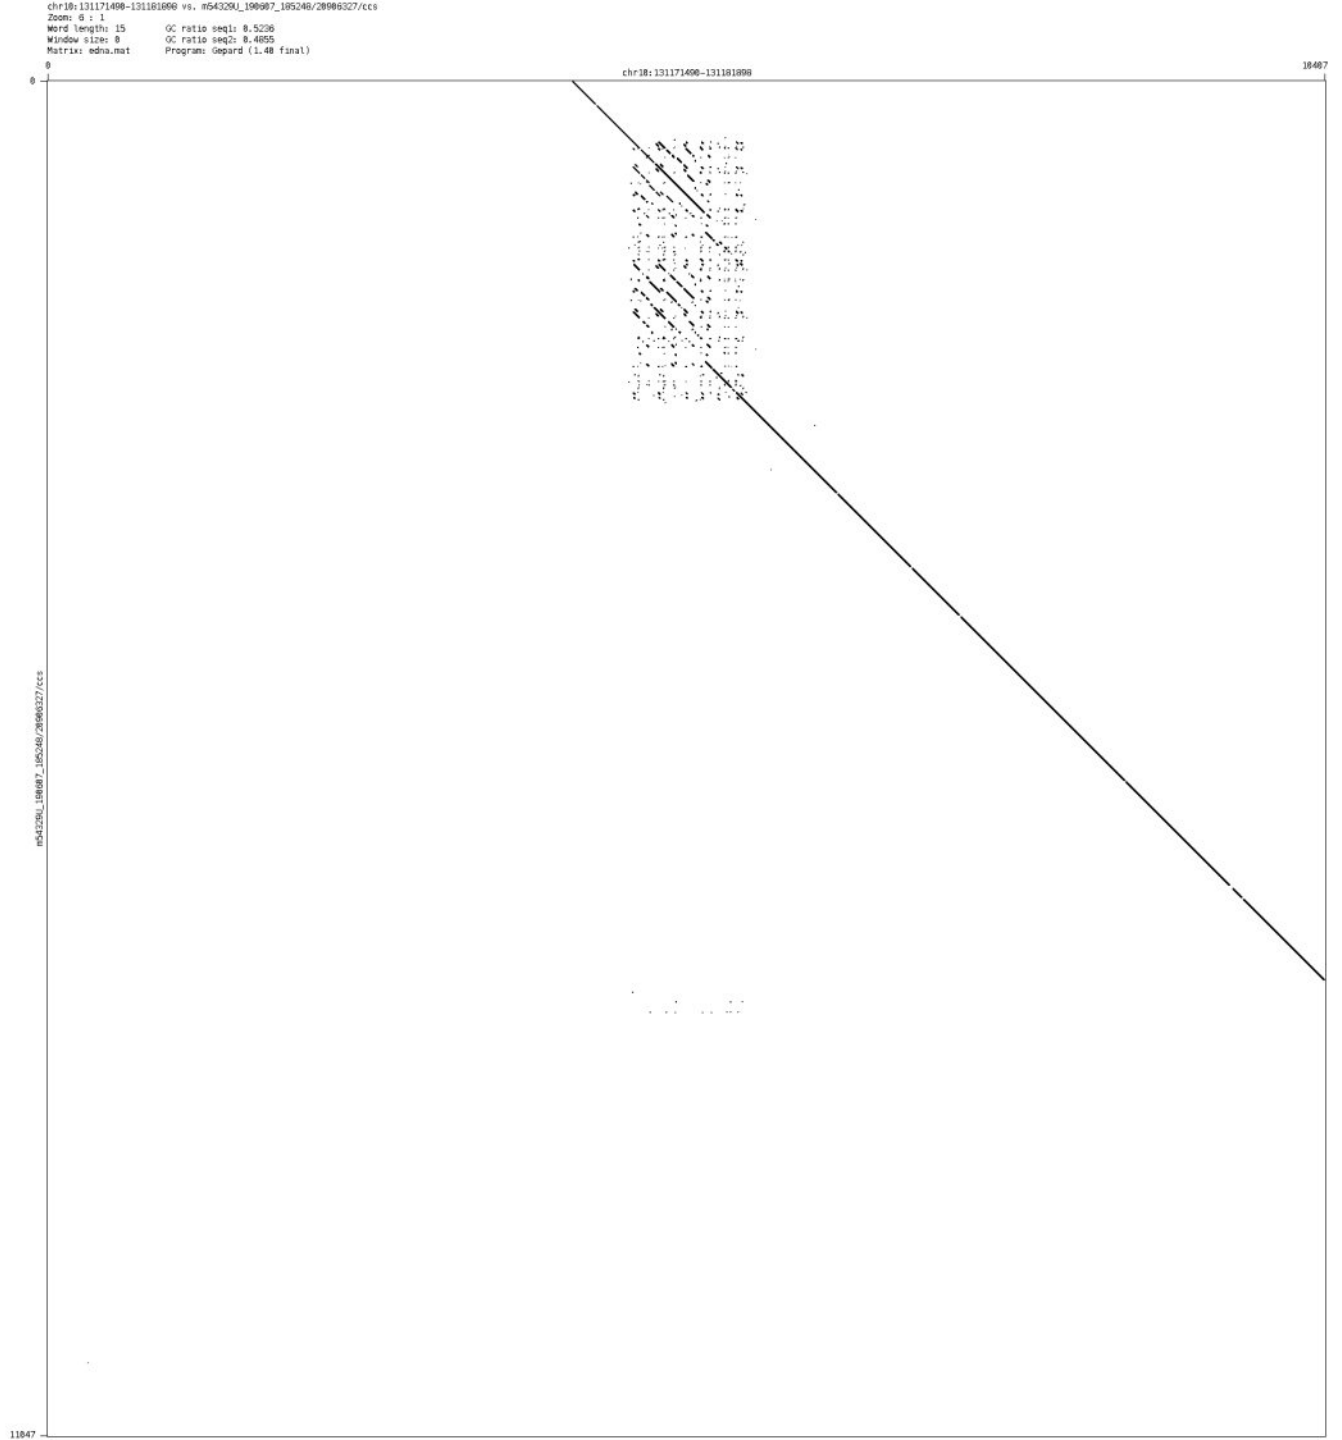

➤ chr10\_131486500\_131486696

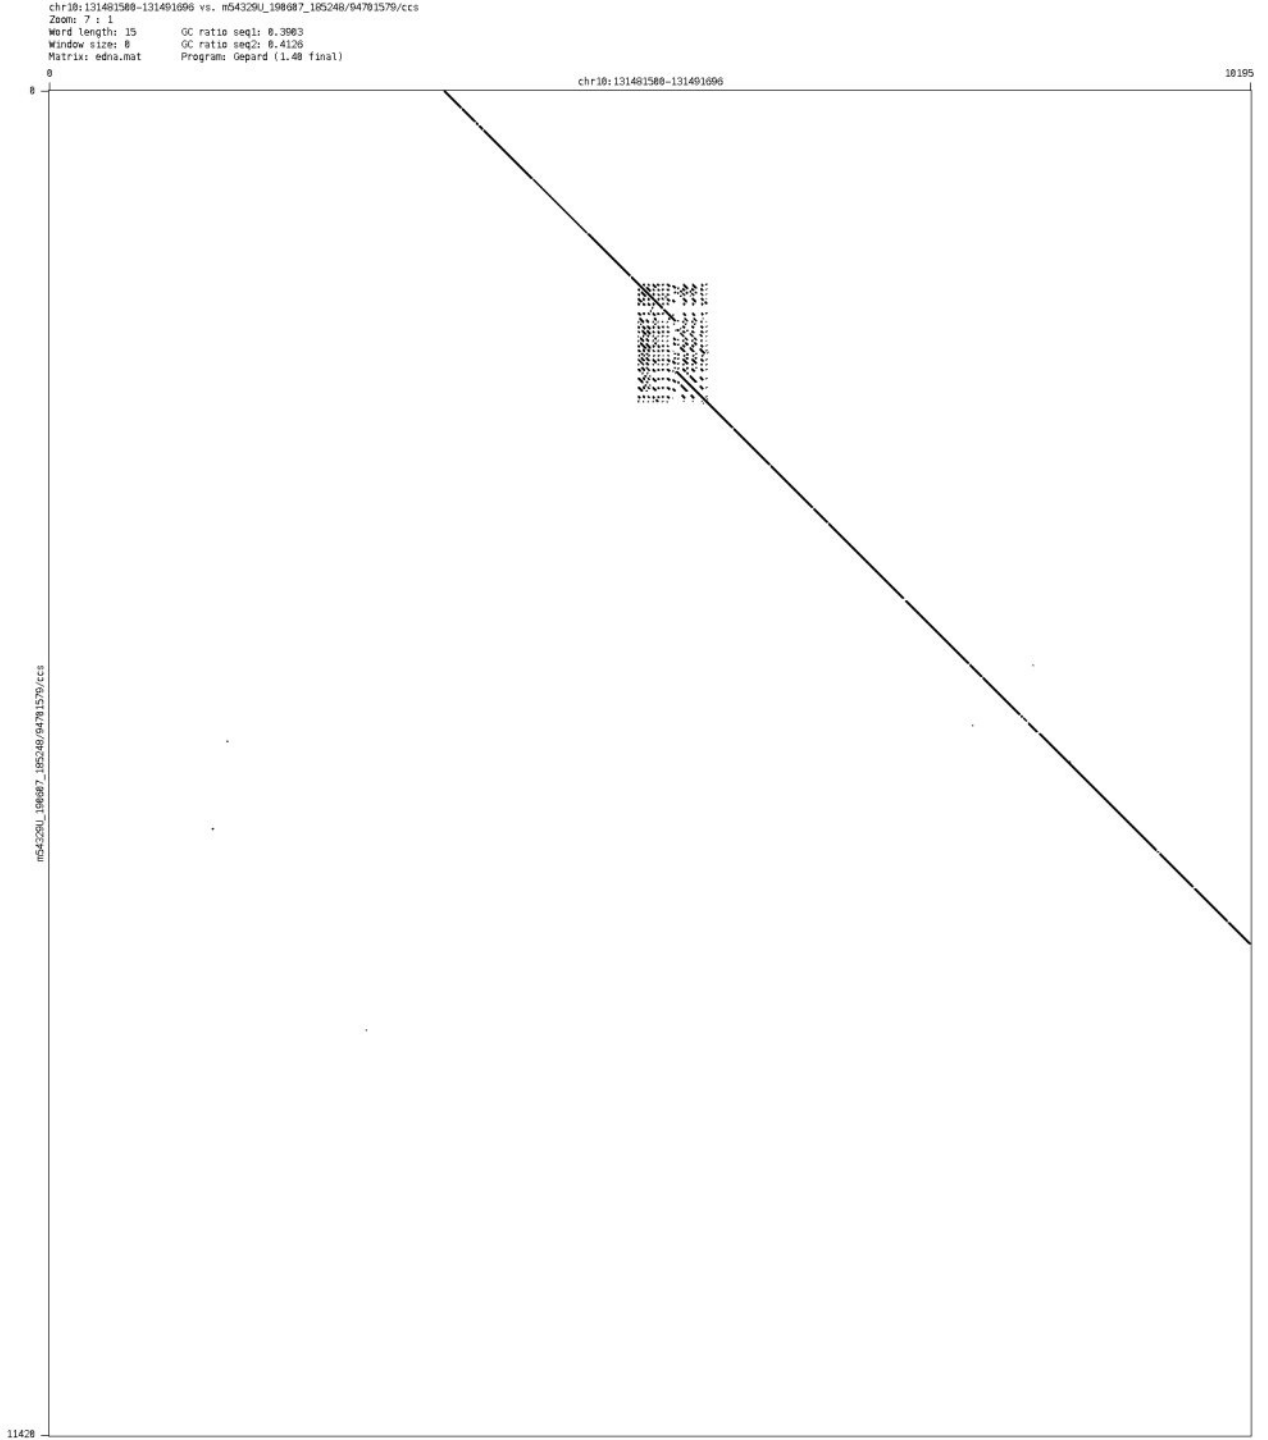

➤ chr10\_132364374\_132364814

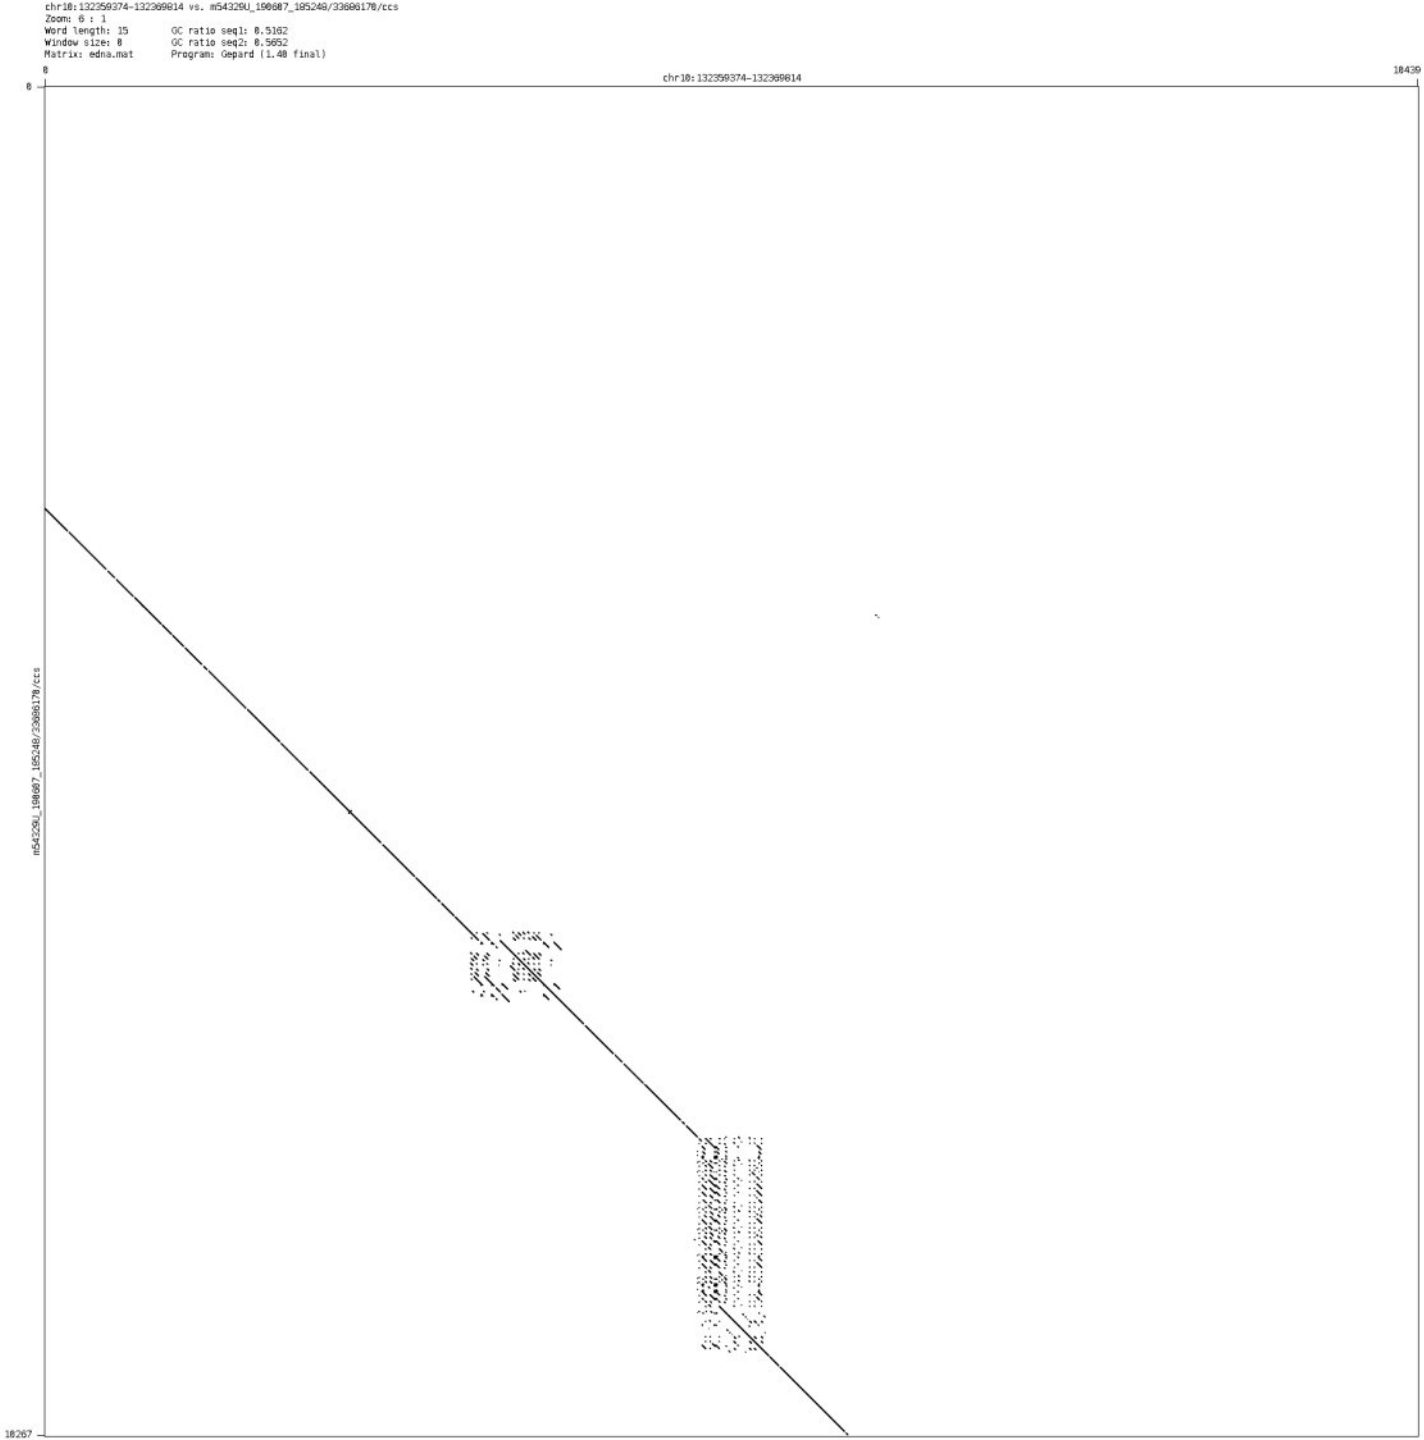

➤ chr10\_132820153\_132824176

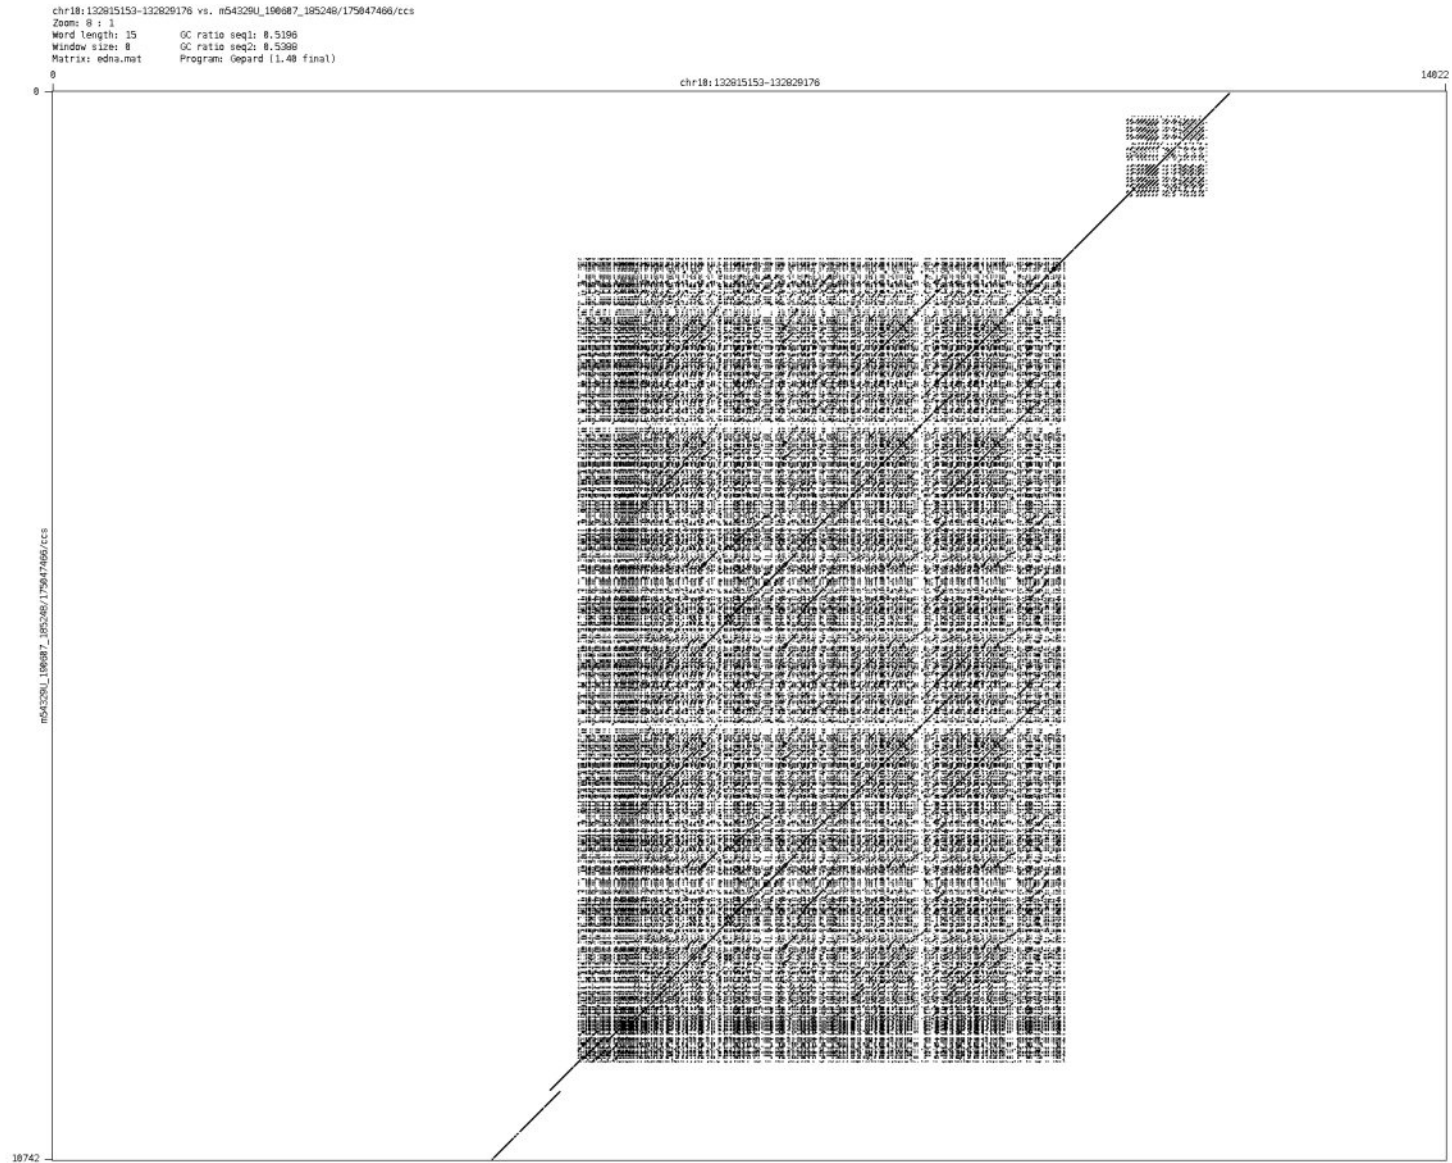

➤ chr10\_133010210\_133011617

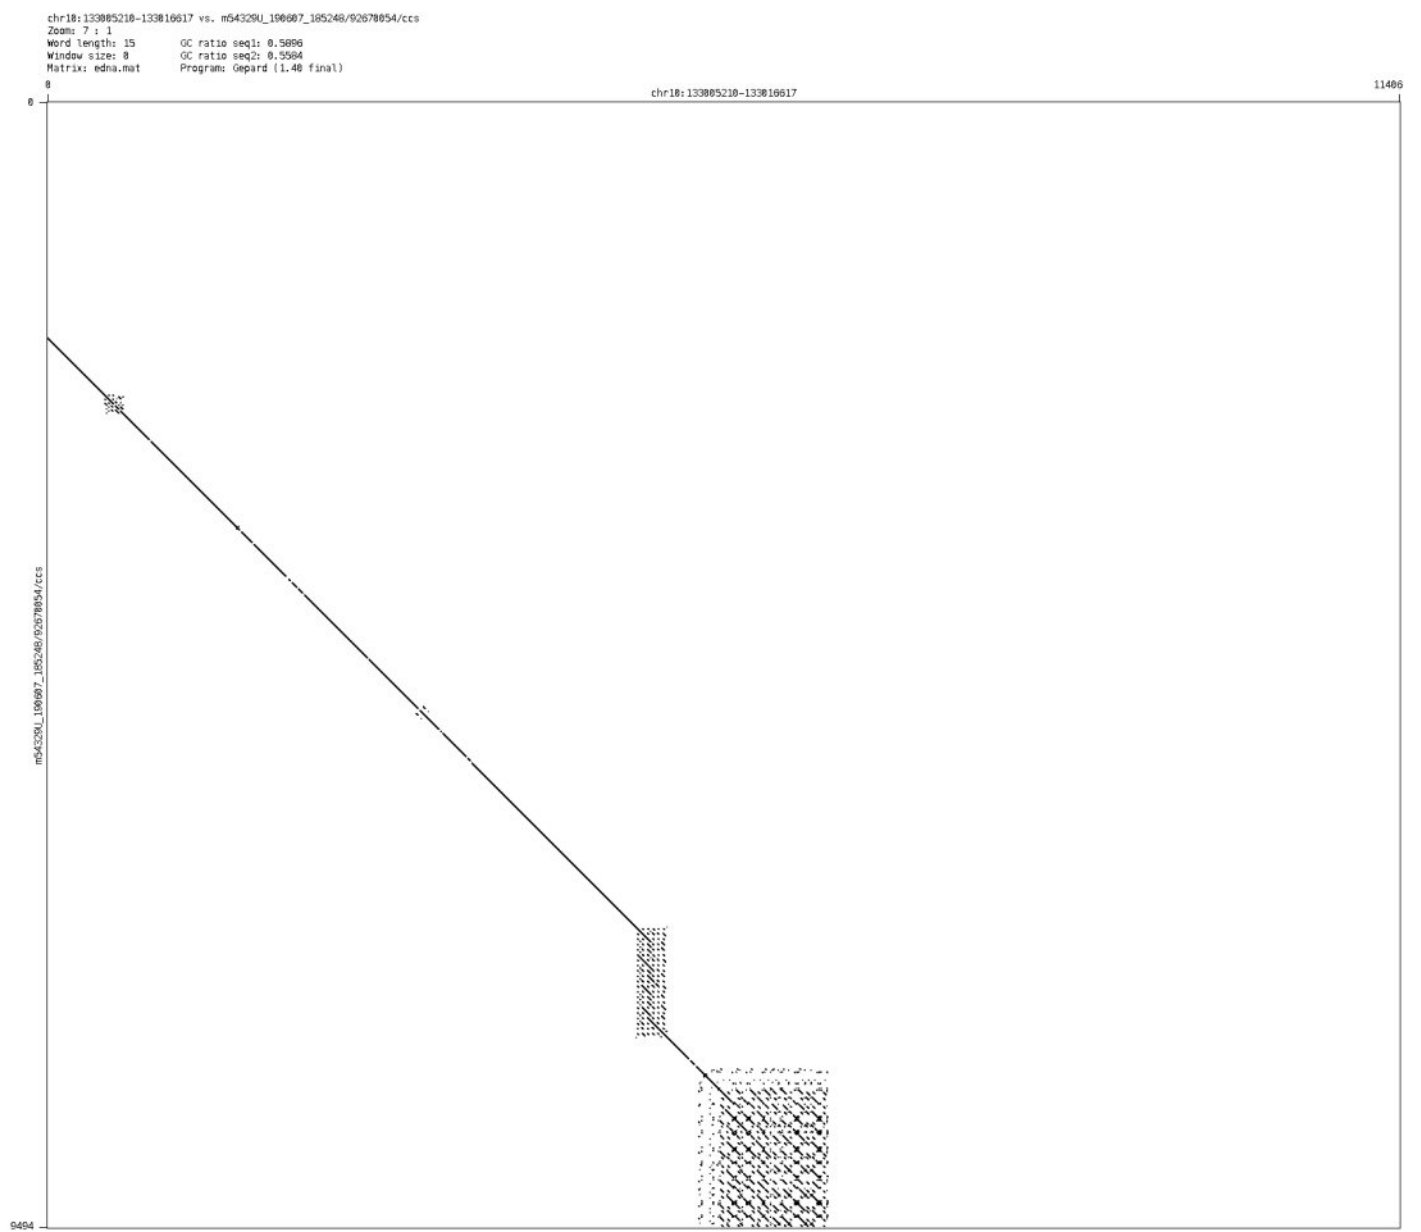

➤ chr10\_133066182\_133066276

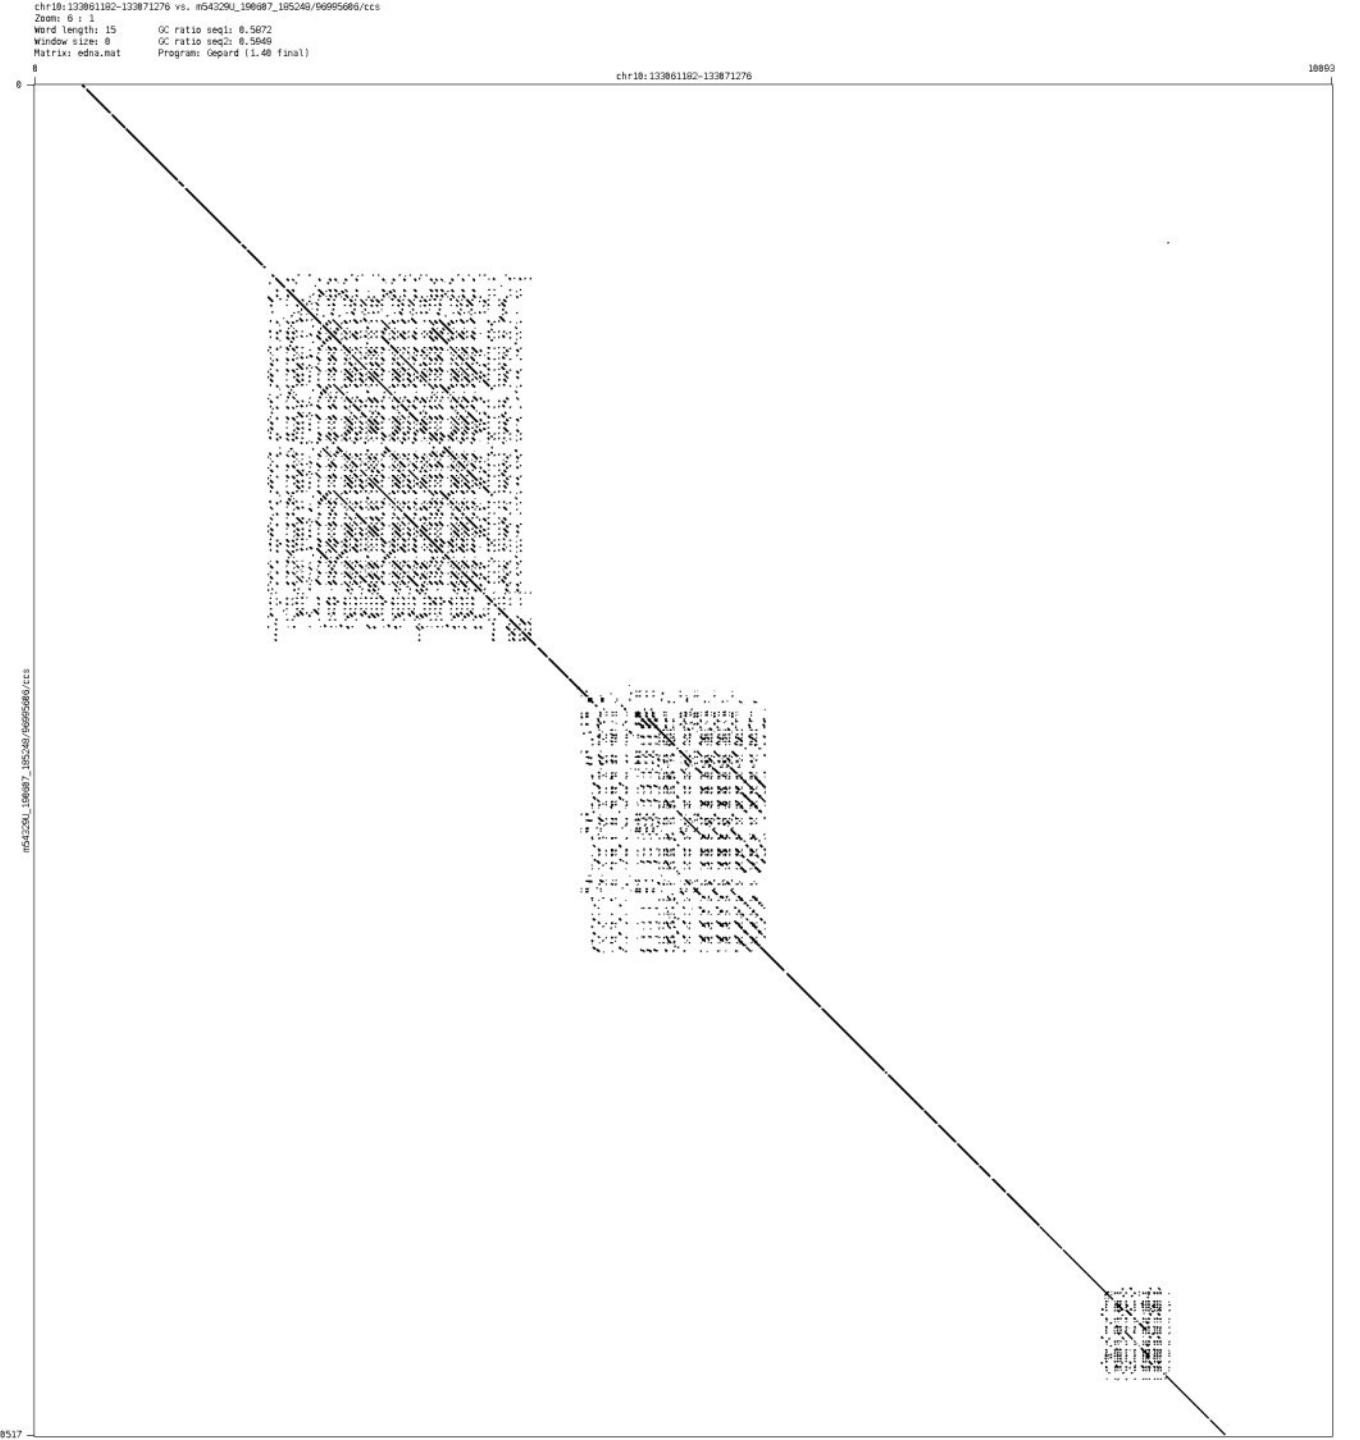

➤ chr10\_133290814\_133292455

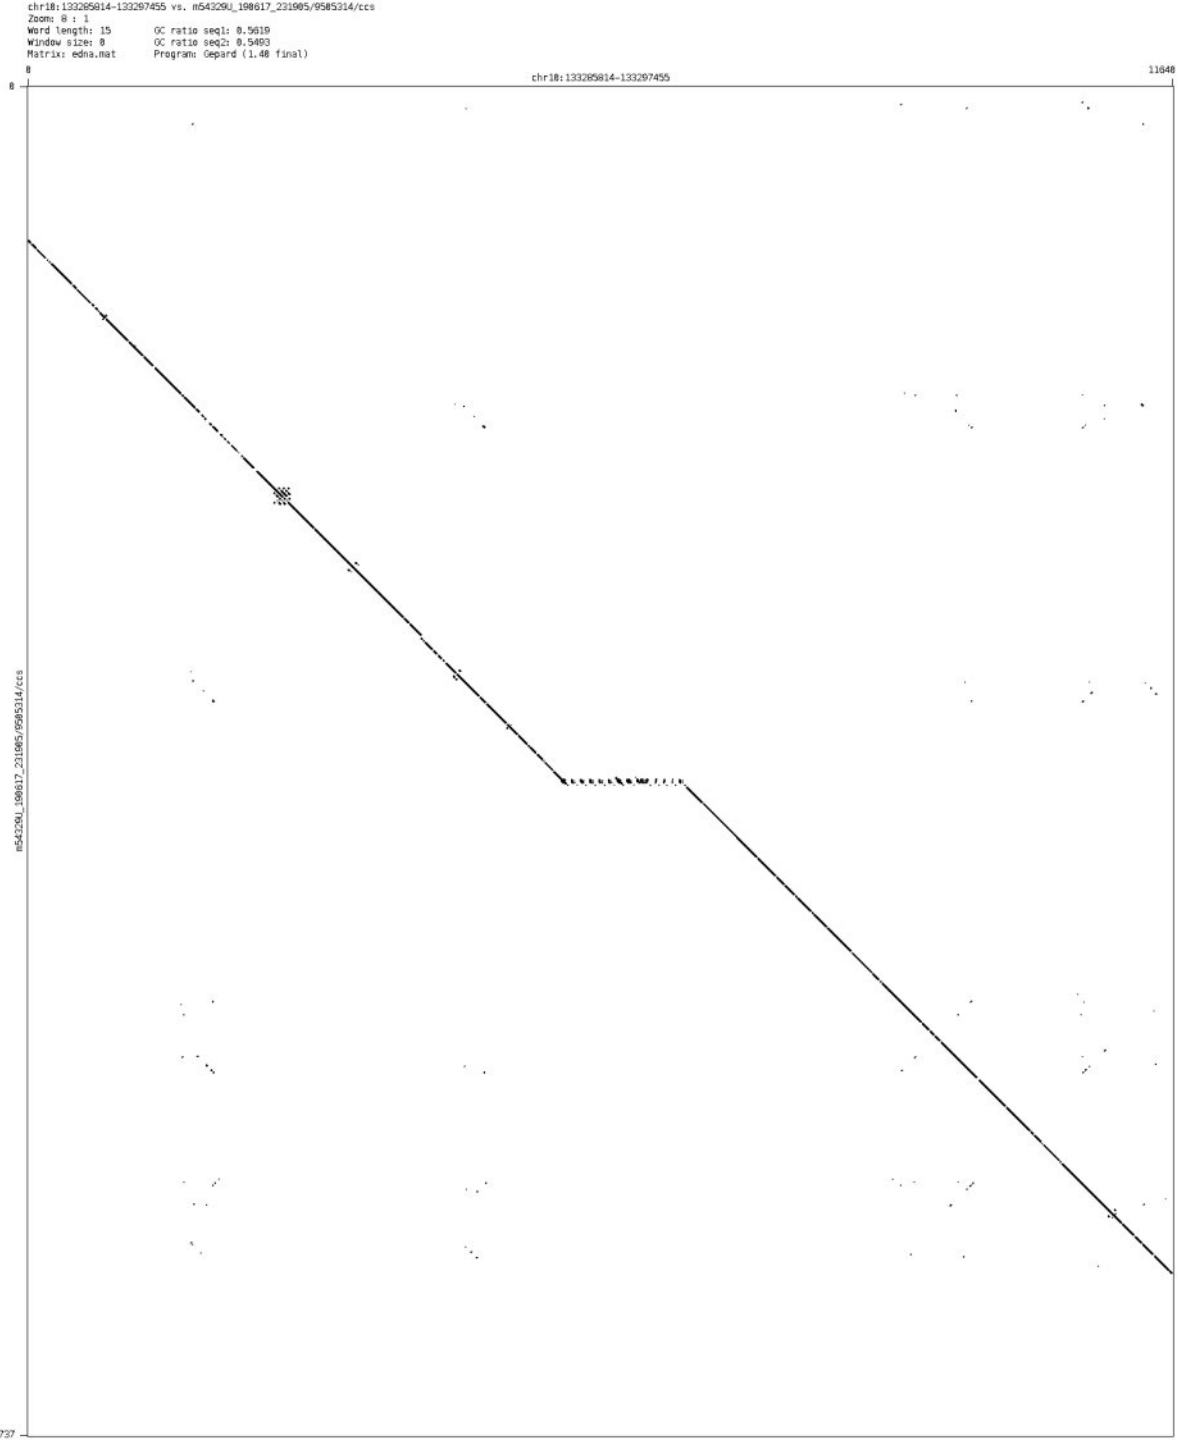

➤ chr11\_3096979\_3097064

chr11:3091979-3182864 vs. m543250\_198987\_185248/54397422/ccs  
Zoom: 0 : 1  
Word length: 15 GC ratio seq1: 0.5291  
Window size: 0 GC ratio seq2: 0.5621  
Matrix: edna.mat Program: Oepard (1.40 final)

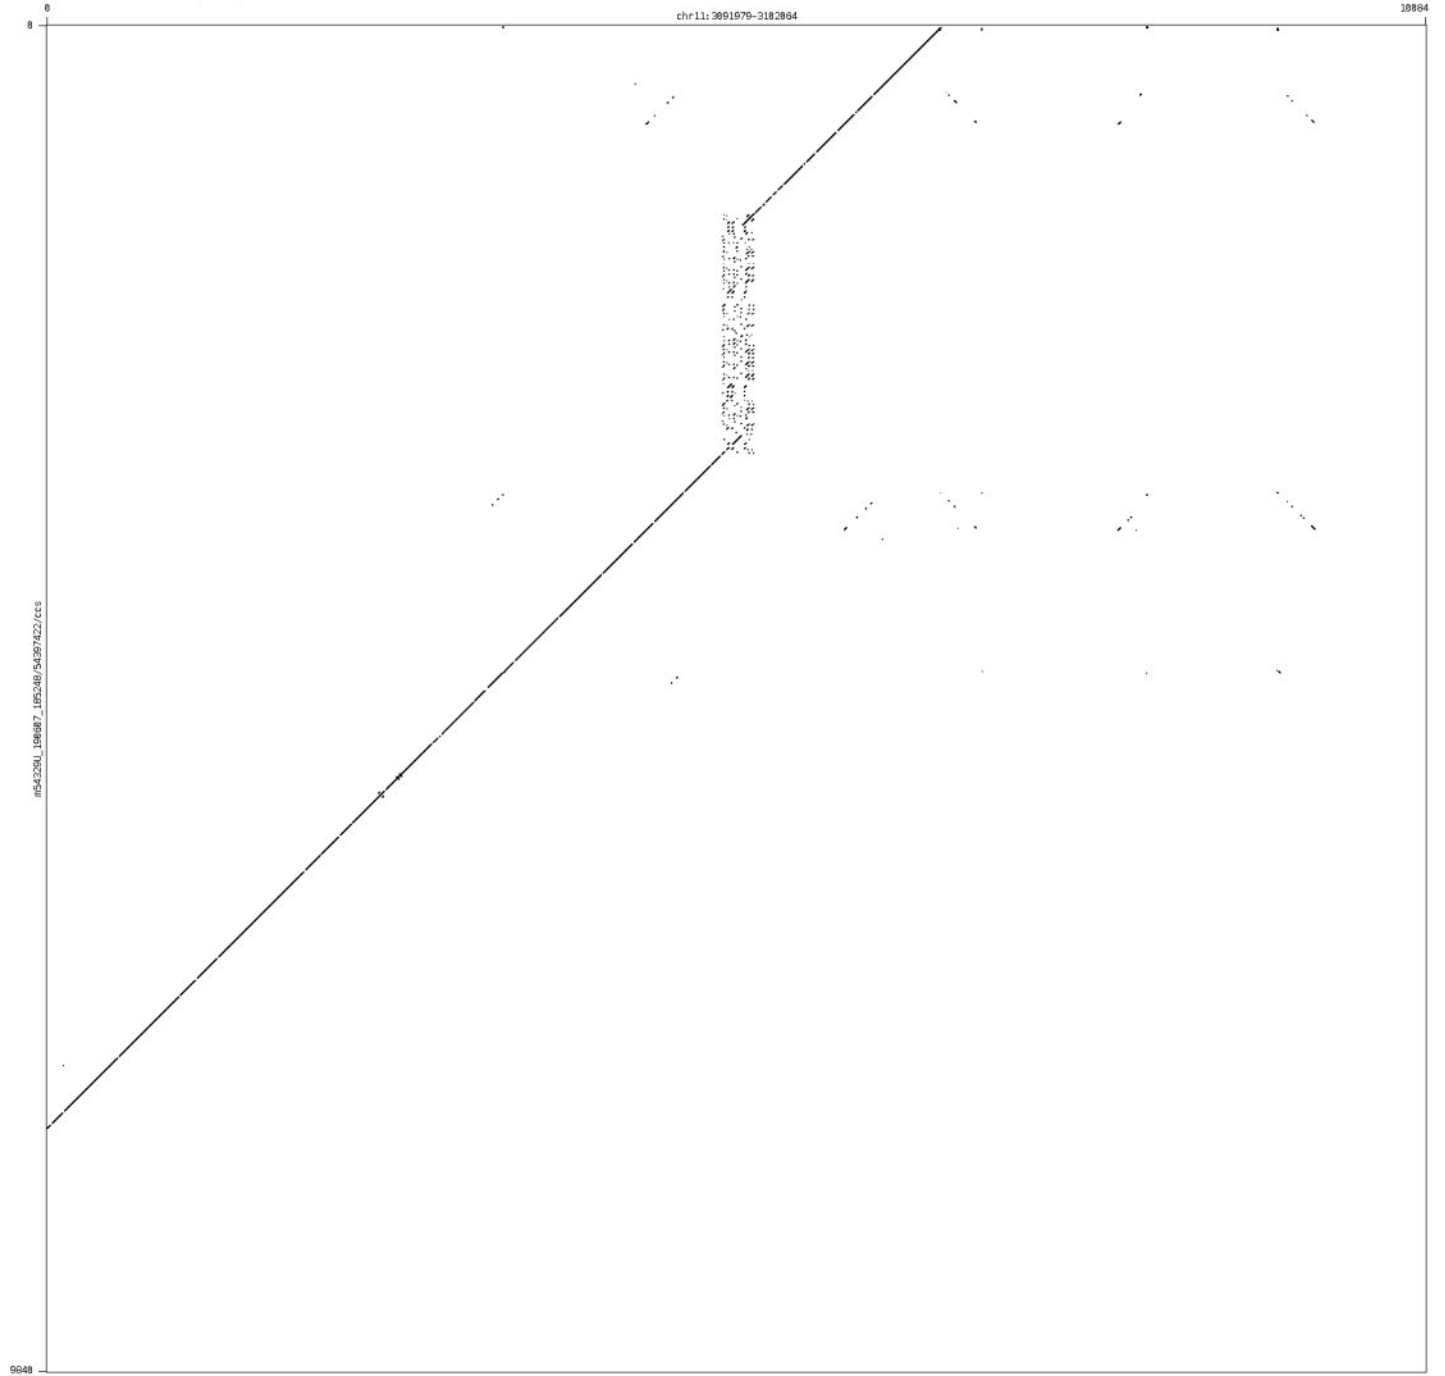



➤ chr11\_24918873\_24919036

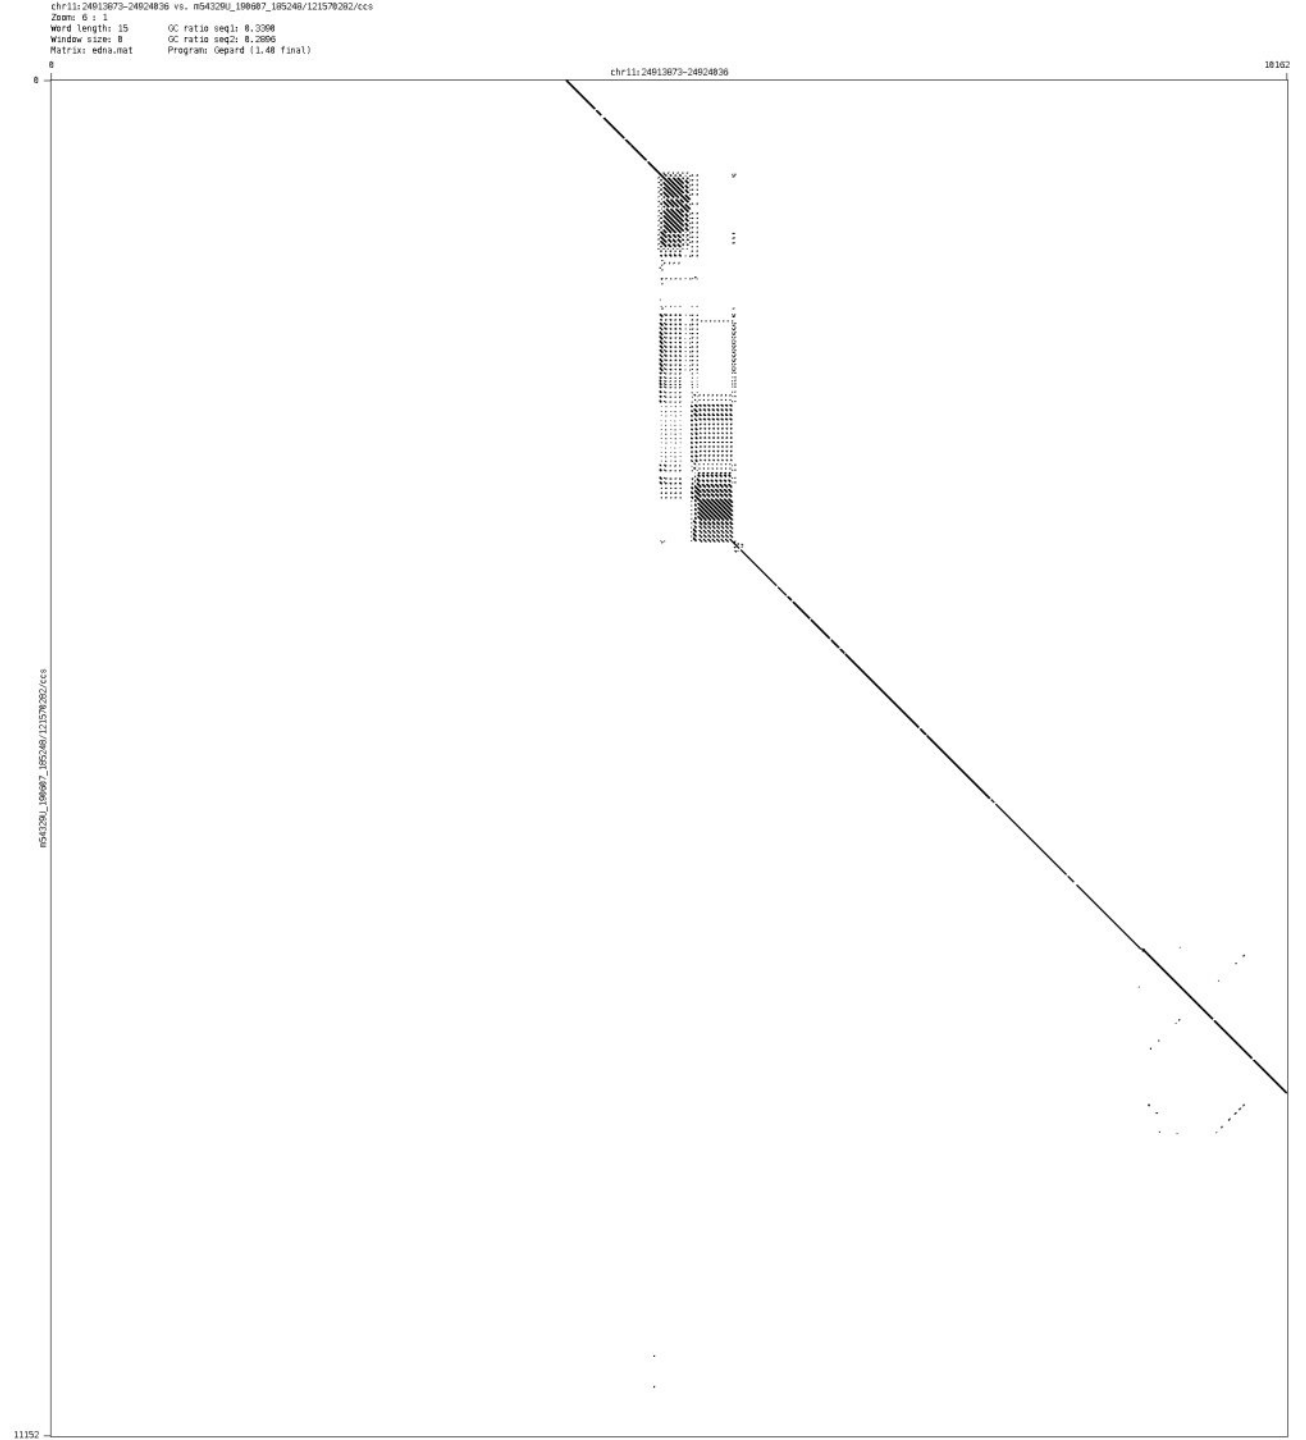

➤ chr11\_36309611\_36309970

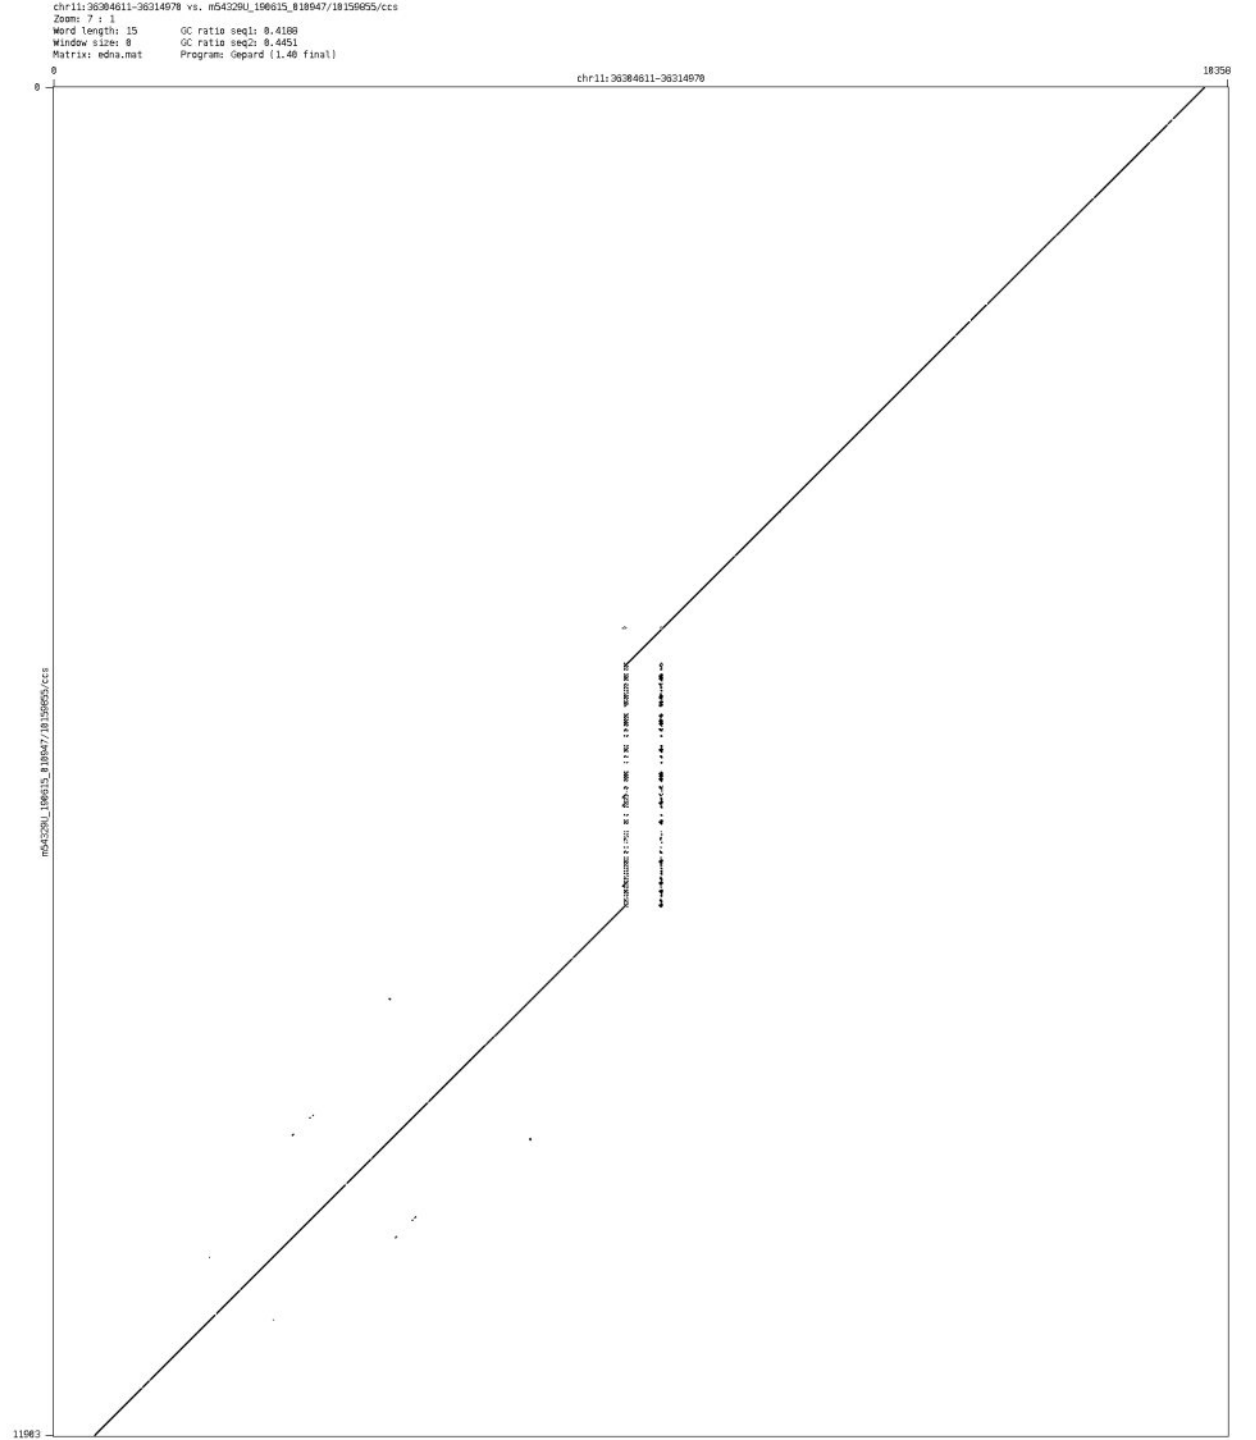

➤ chr11\_59277818\_59282964

chr11:59272818-59287964 vs. m54329U\_190697\_185248/41419074/ccs  
Zoom: 8 : 1  
Word length: 15 GC ratio seq1: 0.4598  
Window size: 0 GC ratio seq2: 0.3949  
Matrix: edna.mat Program: Gepard (1.40 final)

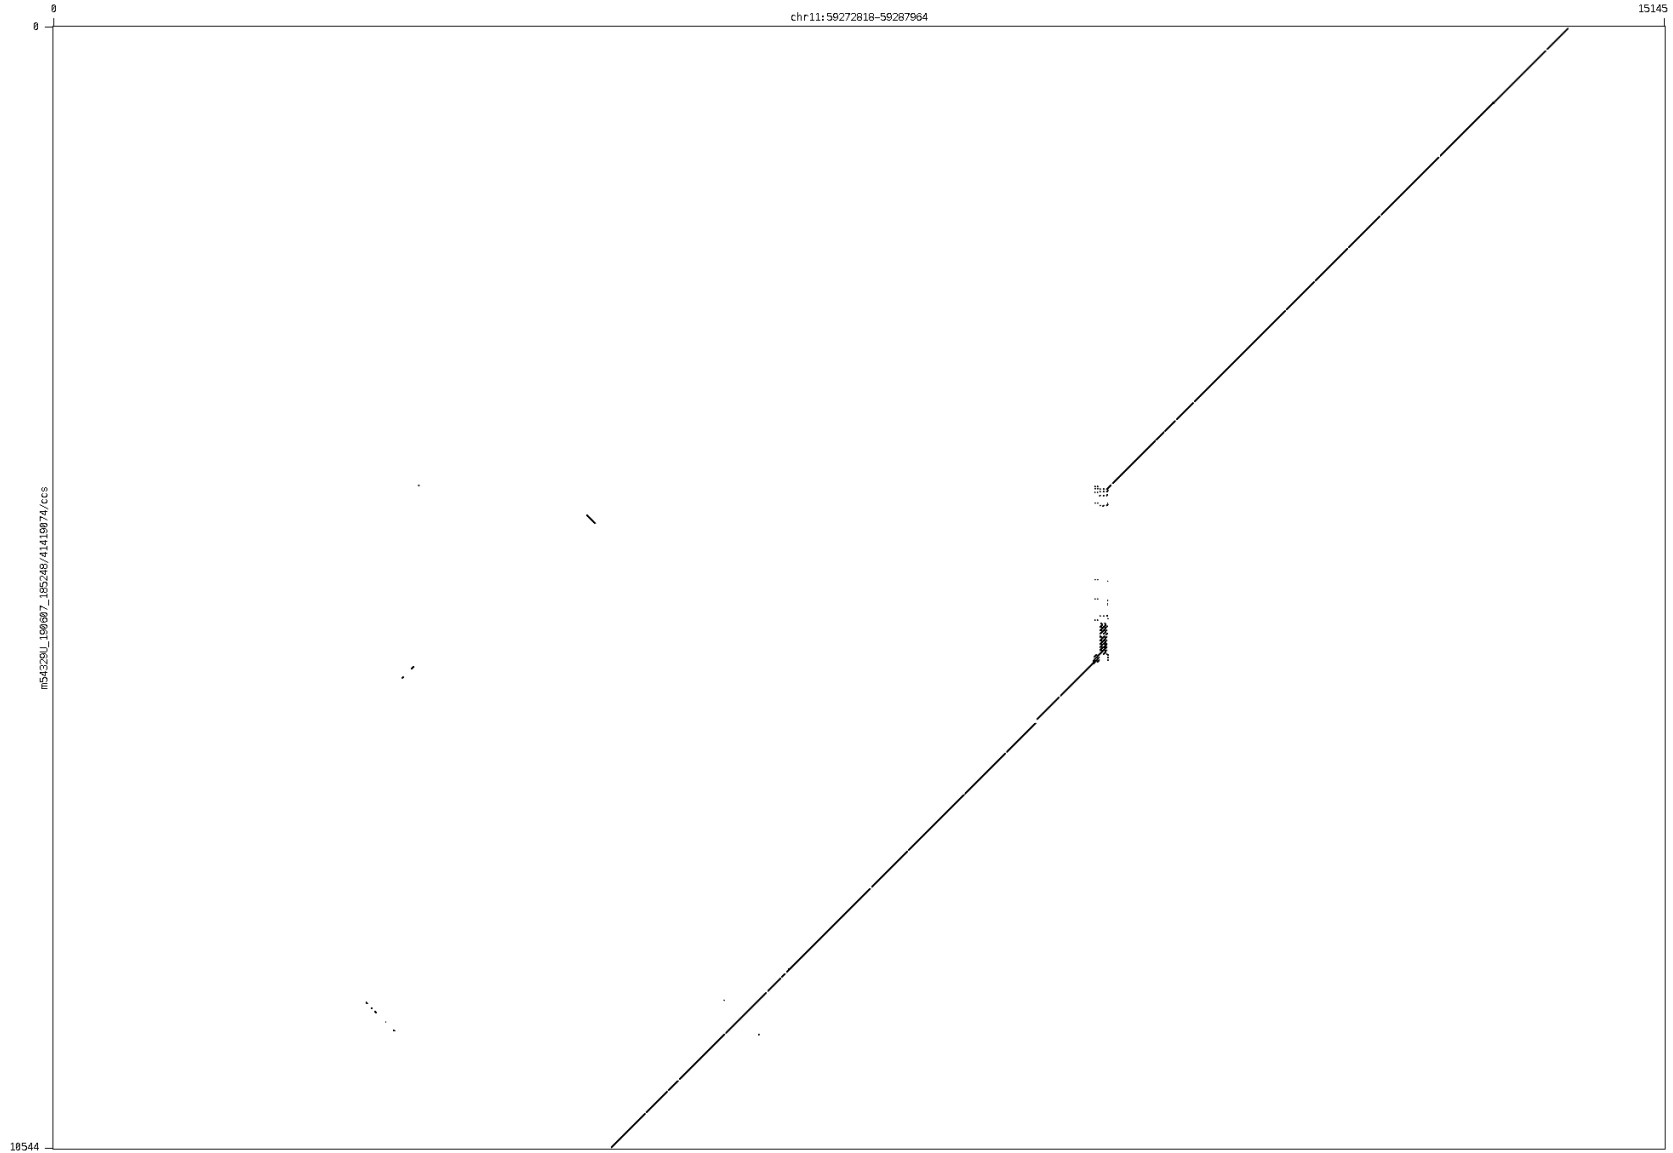

➤ chr11\_61099653\_61099916

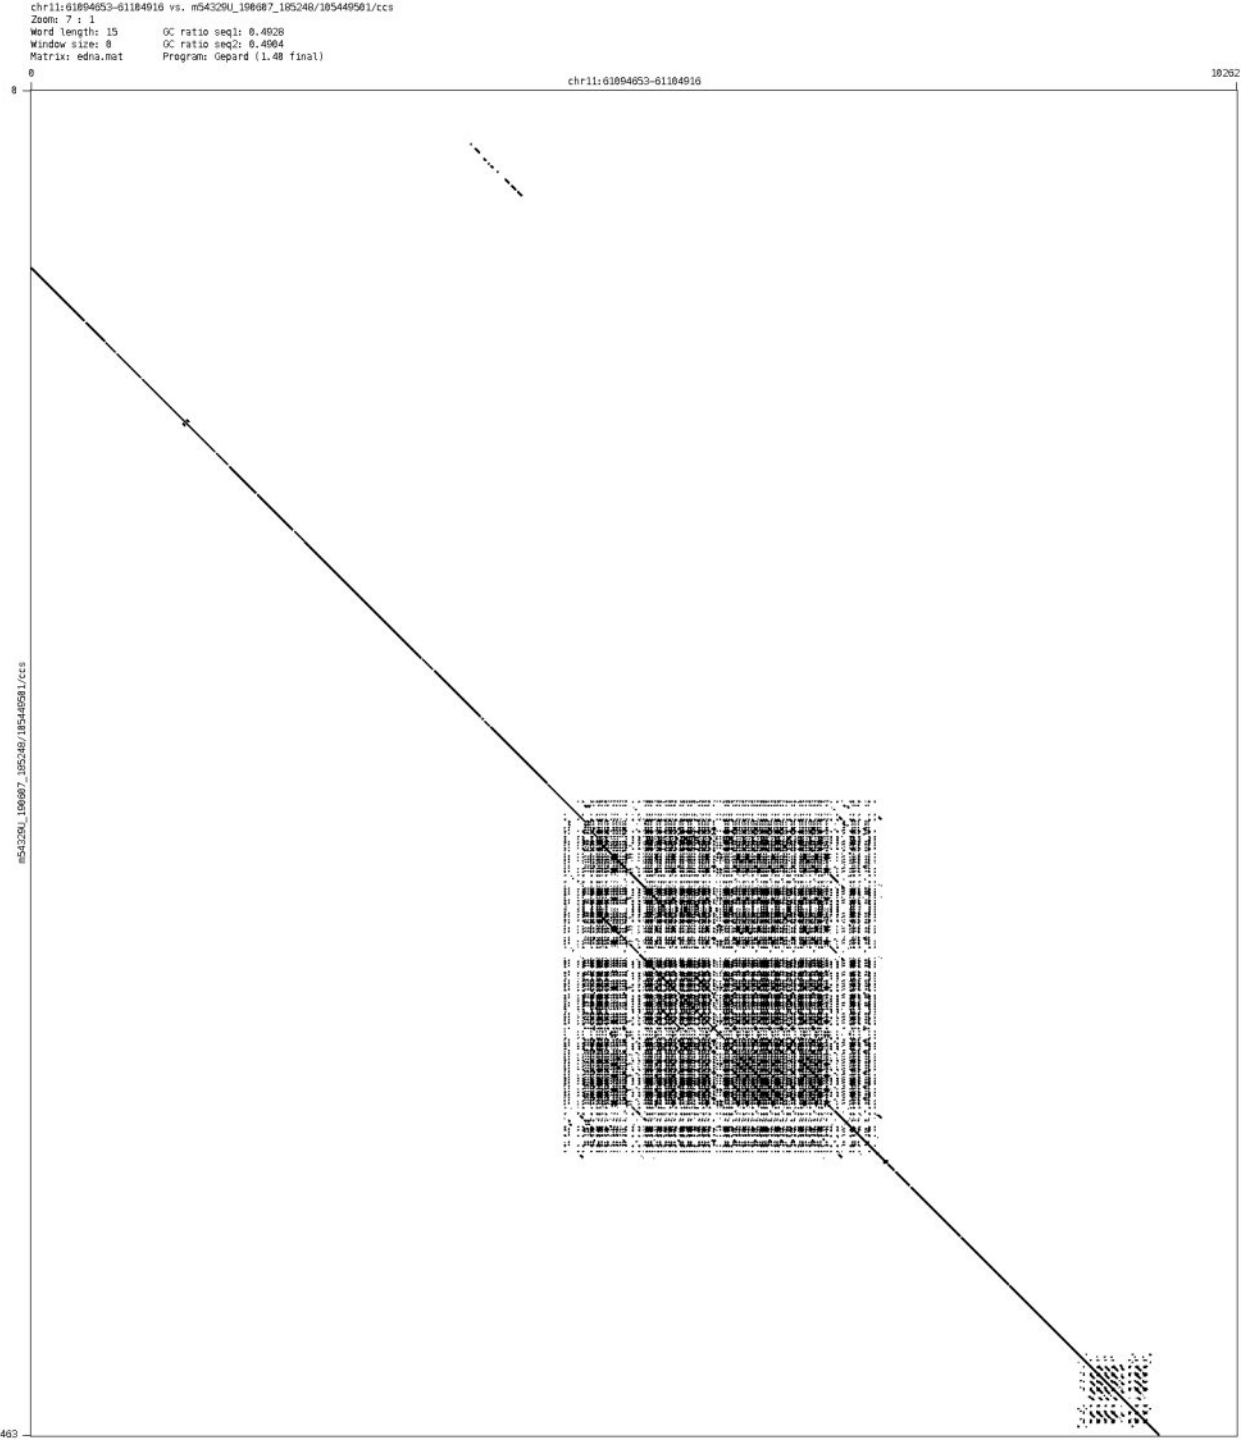

➤ chr11\_63930944\_63934473

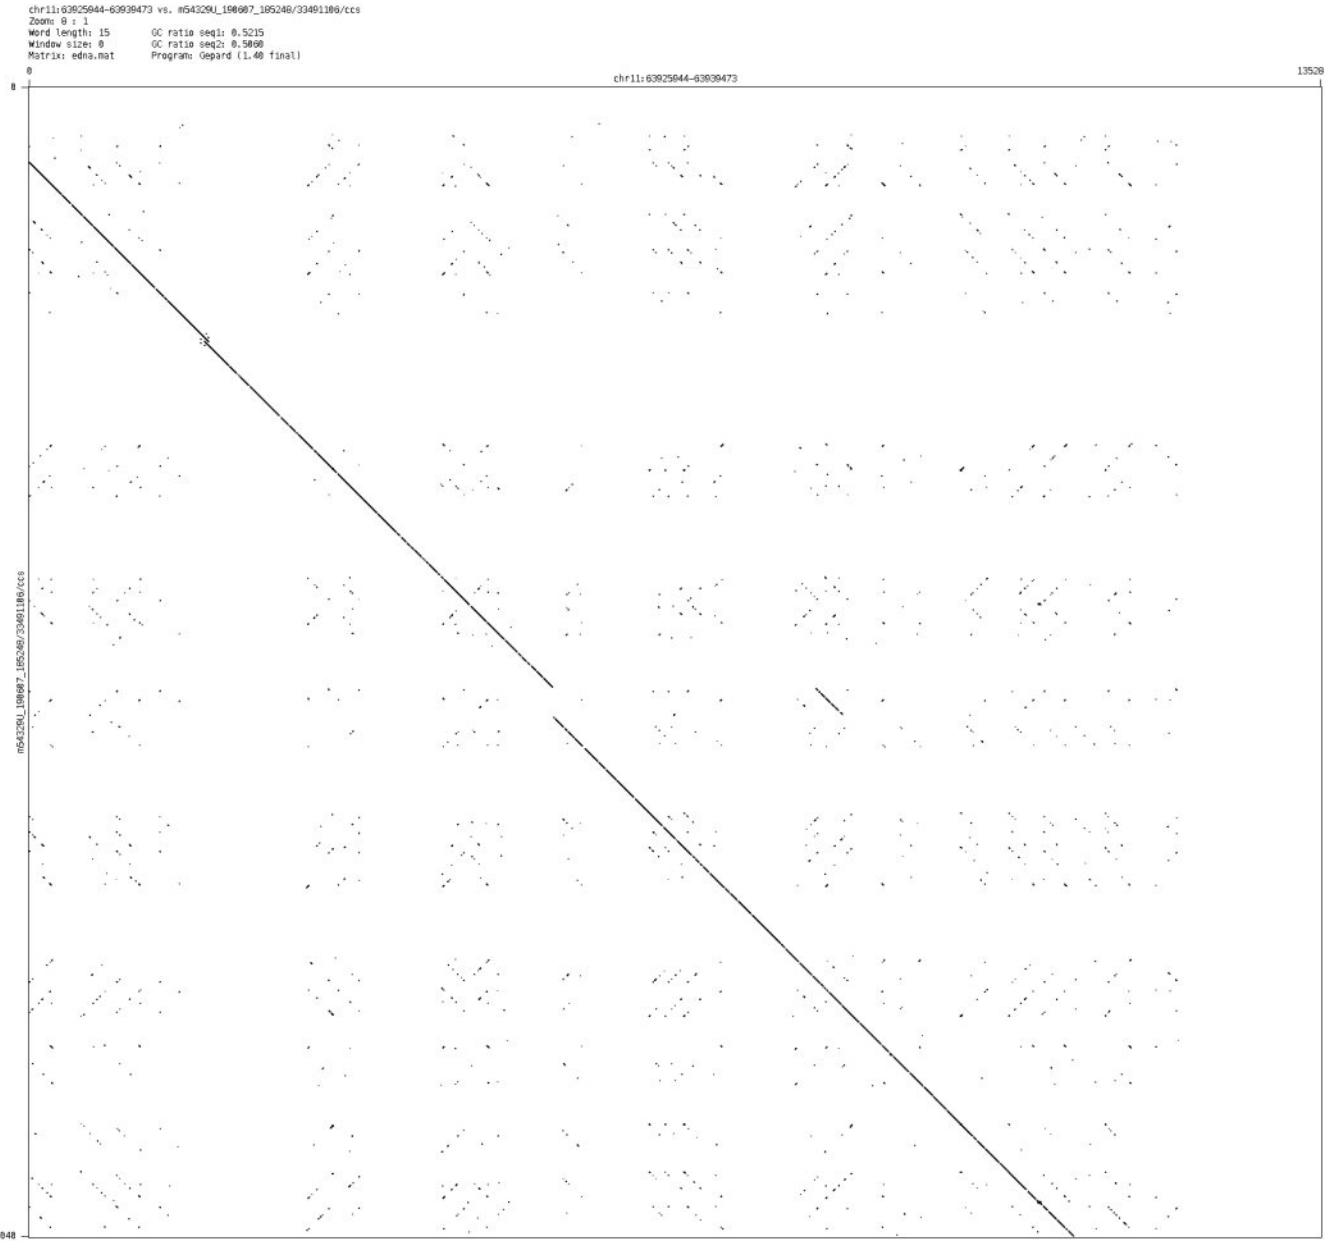

➤ chr11\_68963986\_68964114

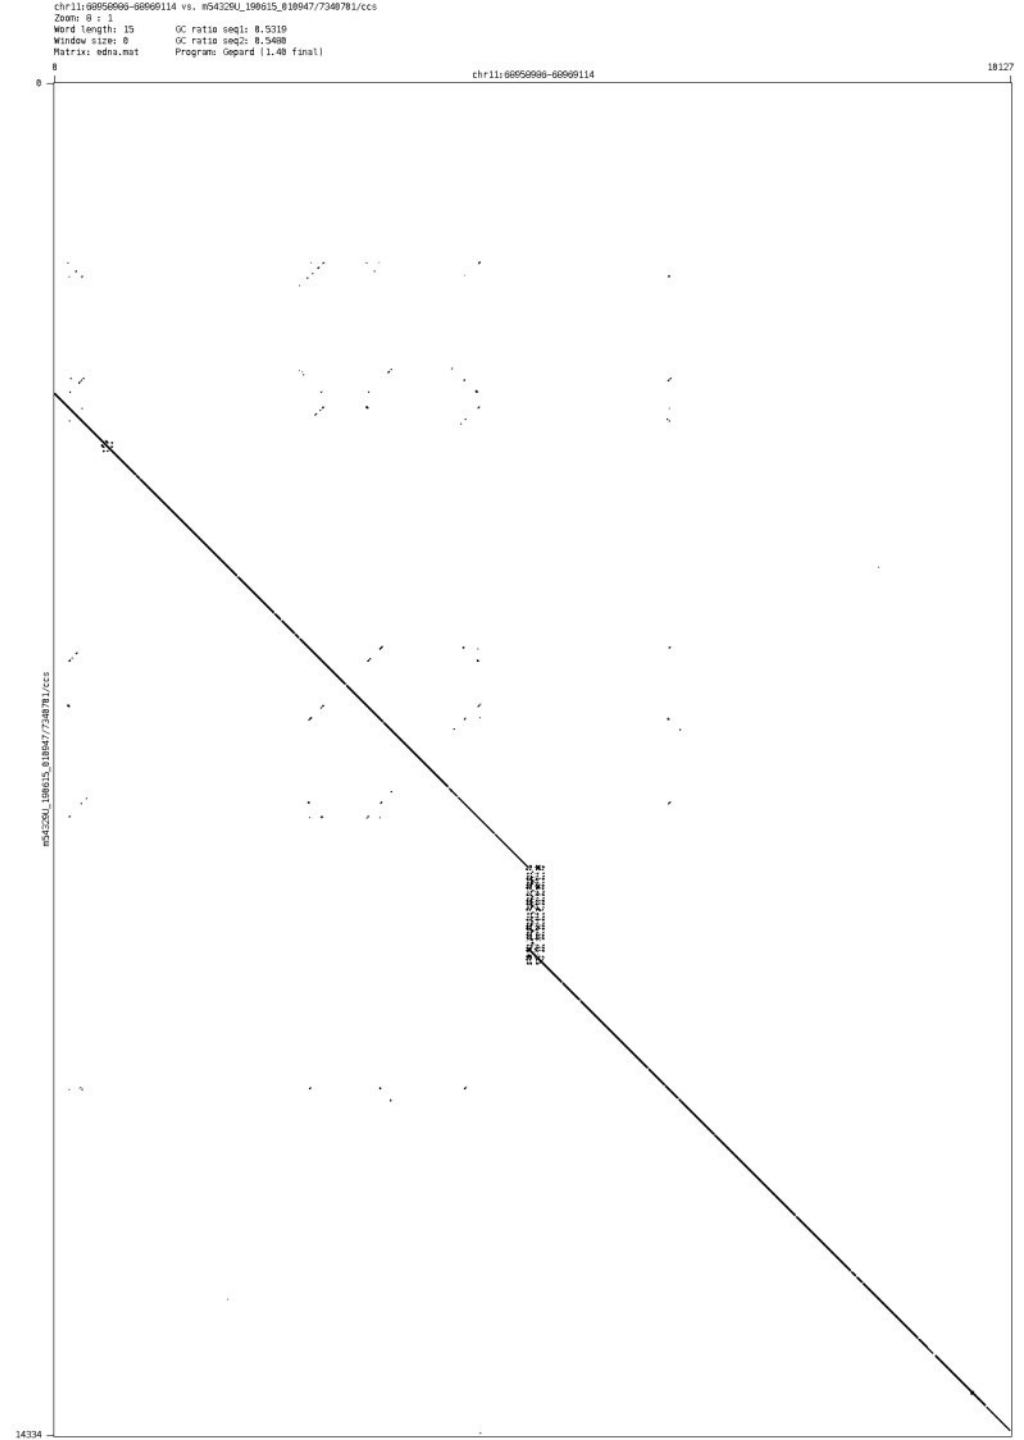

➤ chr11\_71066026\_71066104

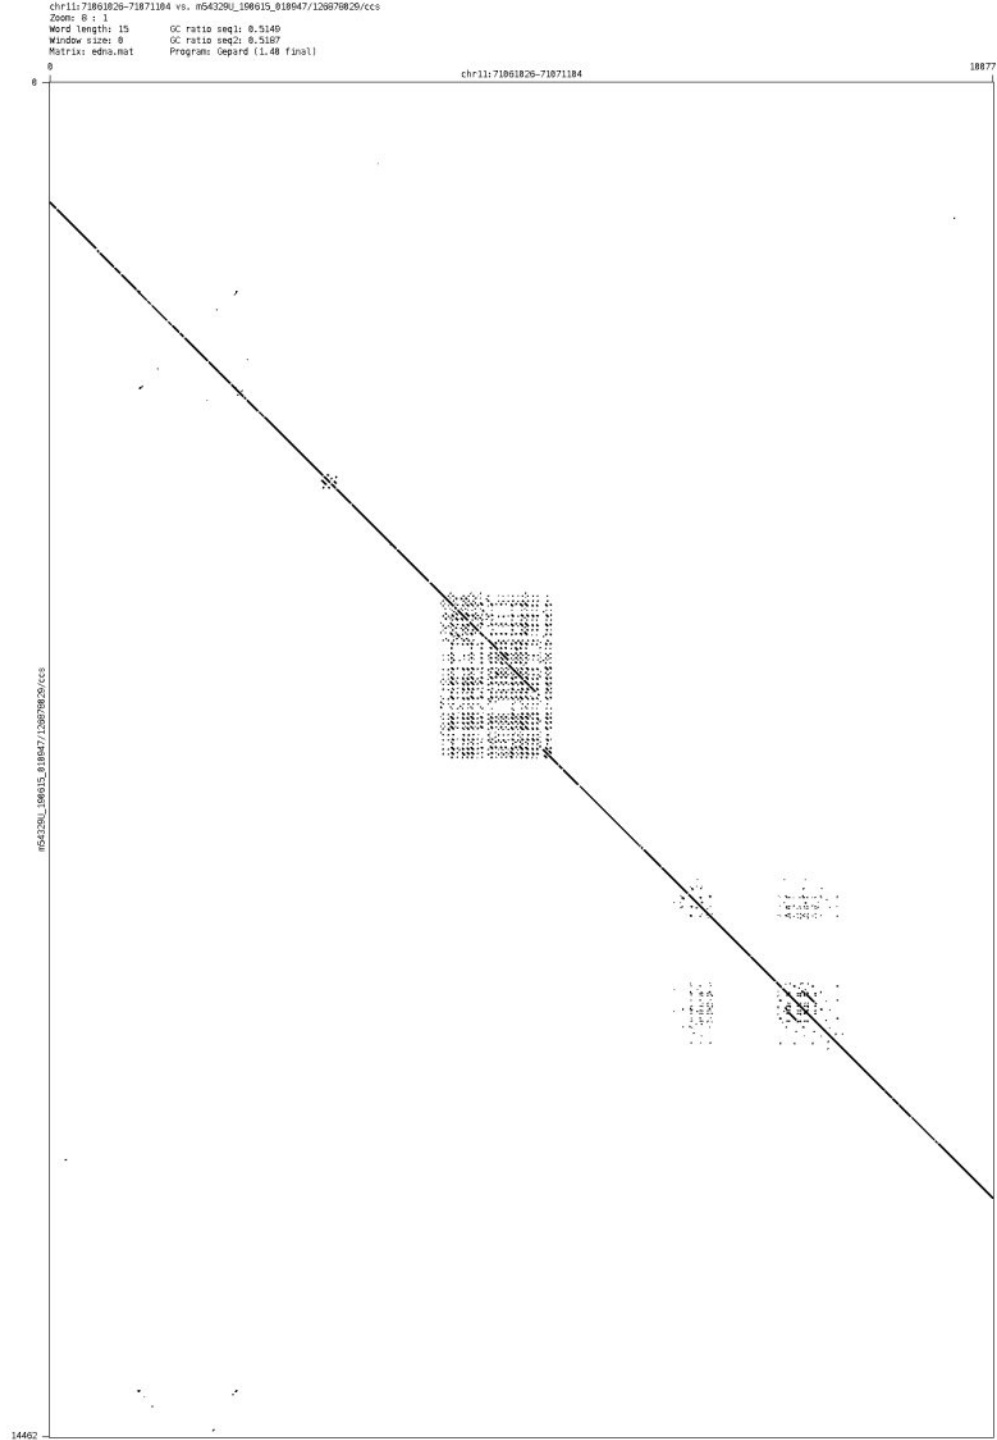

➤ chr11\_92705384\_92705891

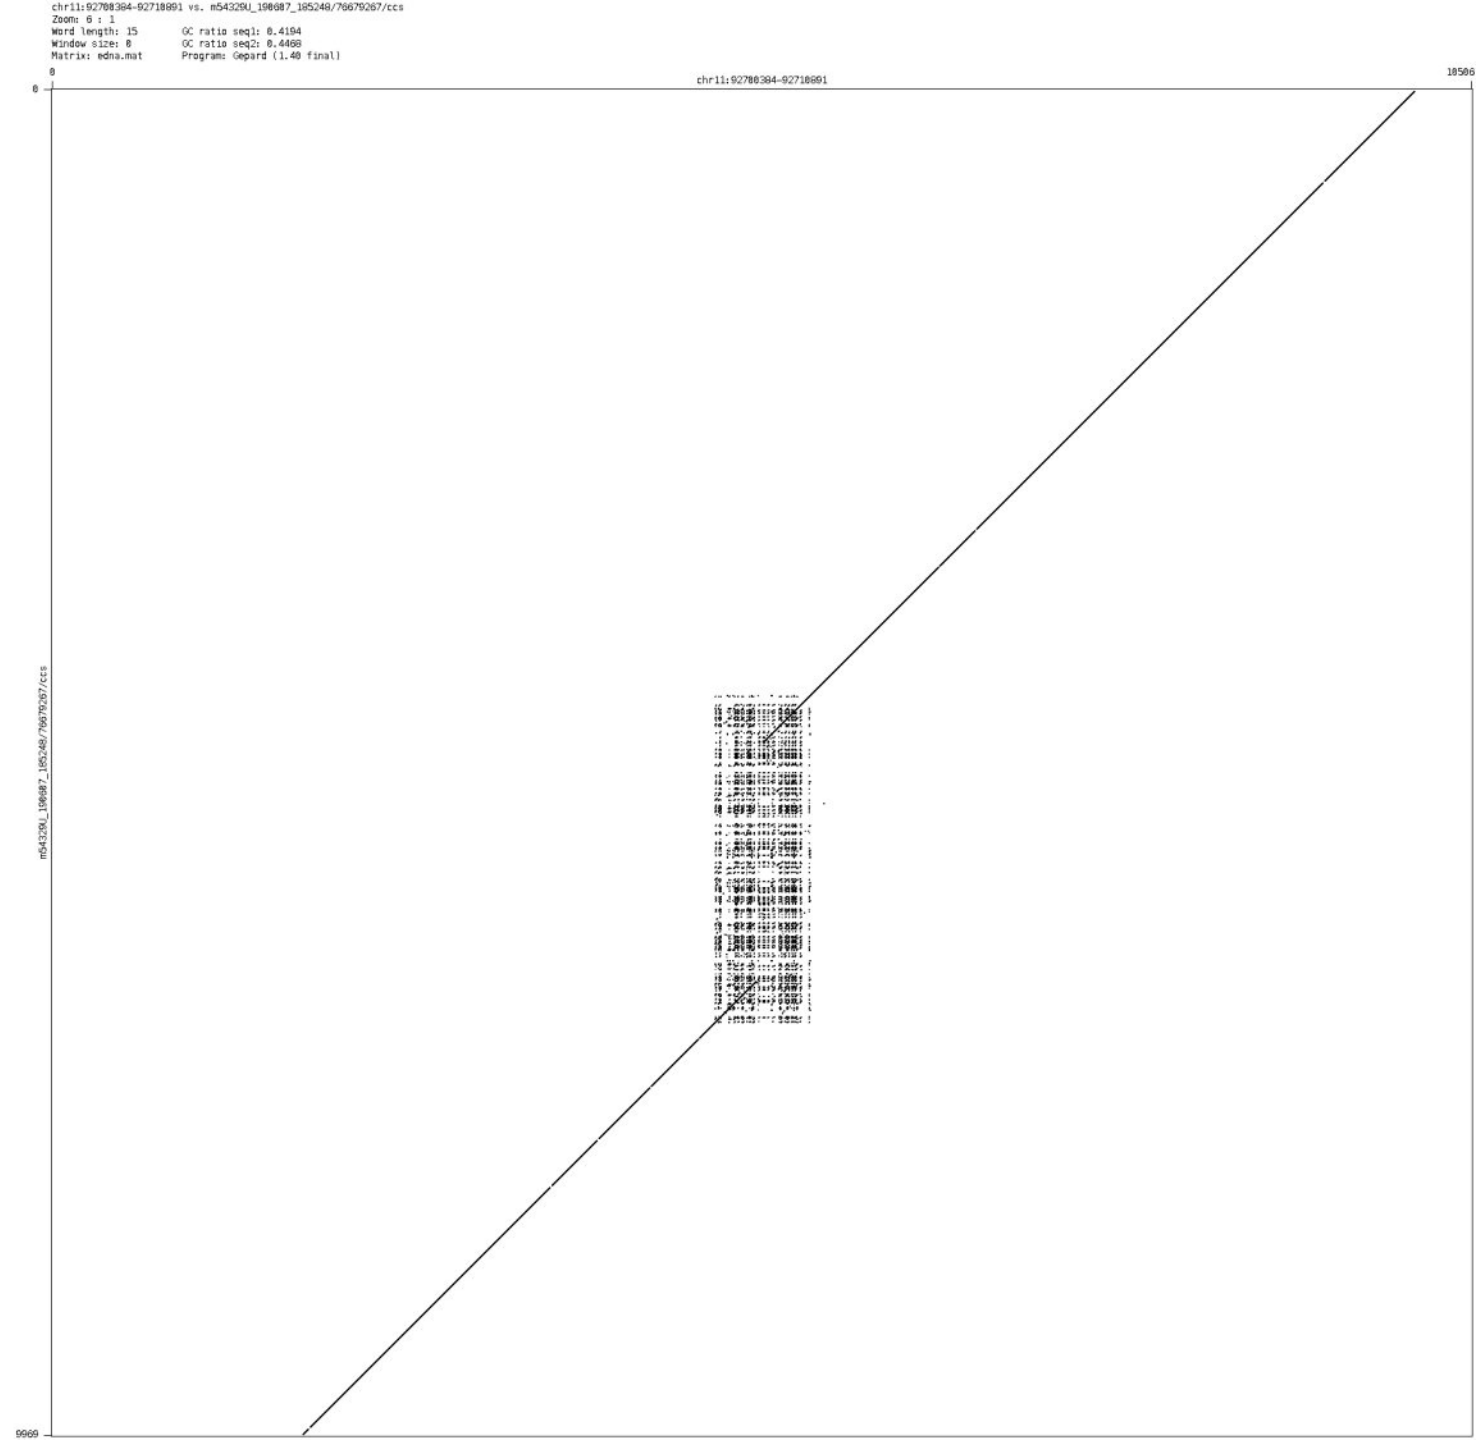



➤ chr11\_95633307\_95634471

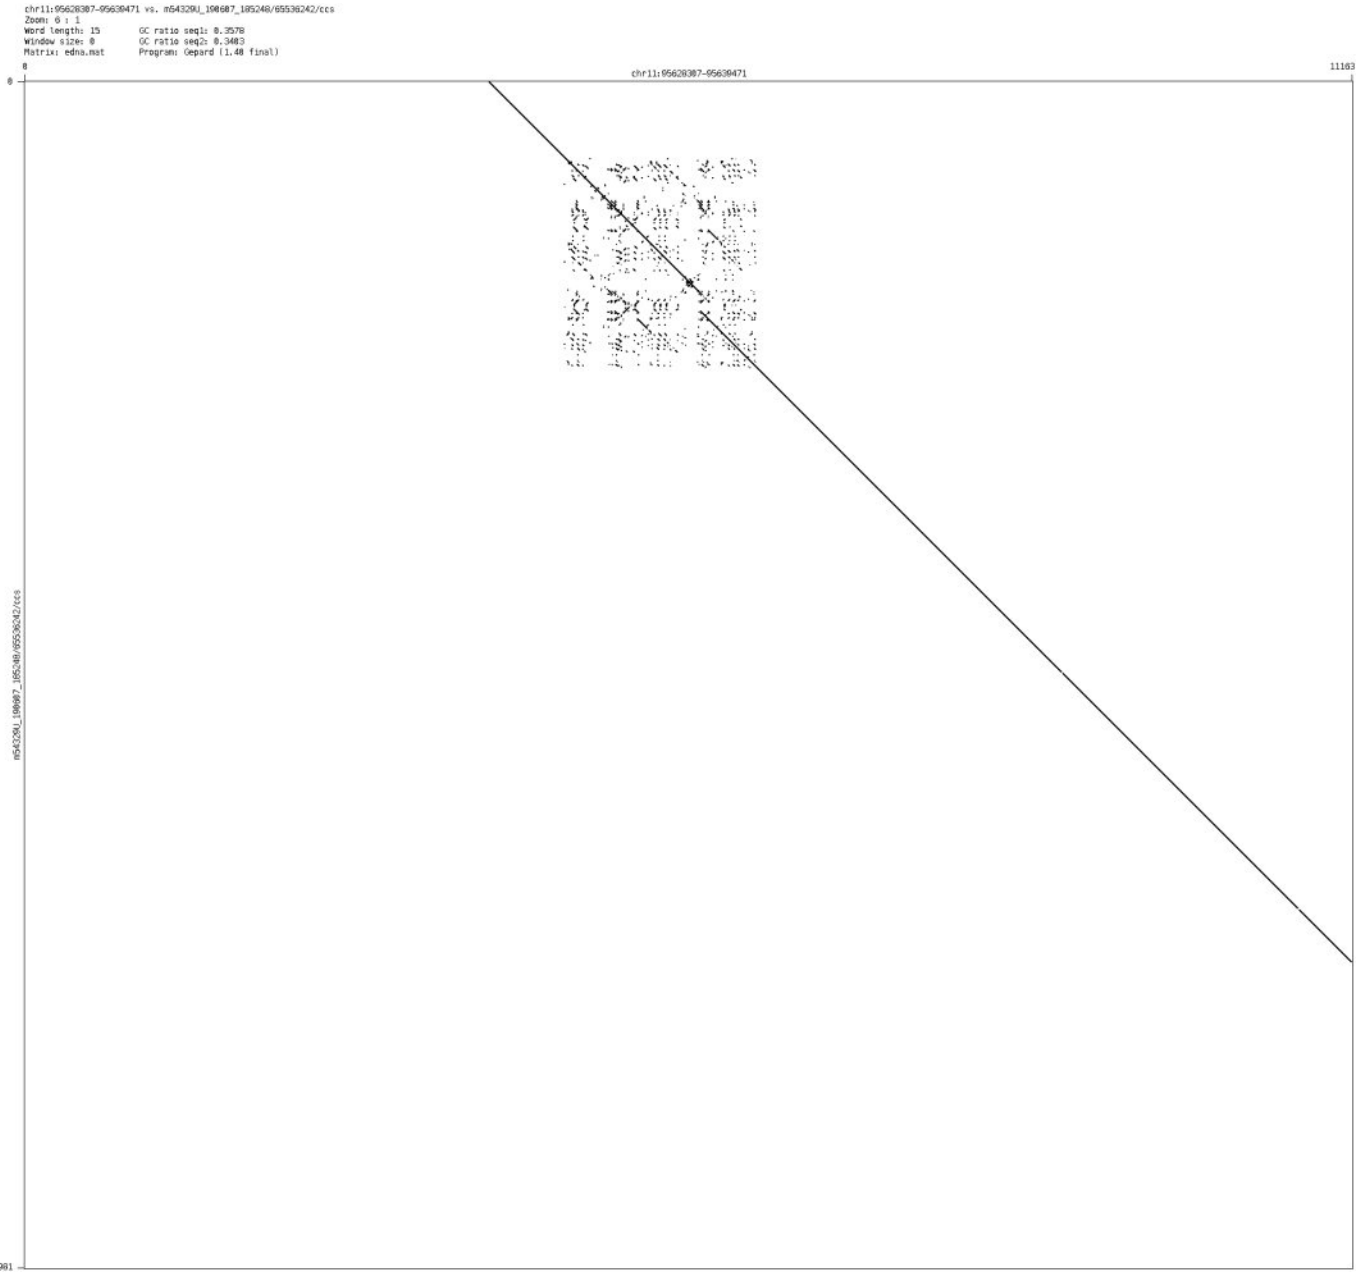

➤ chr11\_99819490\_99820566

chr11:99814490-99825566 vs. m543290\_198617\_231985/158435965/ccs  
Zoom: 8 : 1 GC ratio seq1: 0.3497  
Word length: 15 GC ratio seq2: 0.3847  
Window size: 8 Program: Gepard (1.40 final)  
Matrix: edna.mat

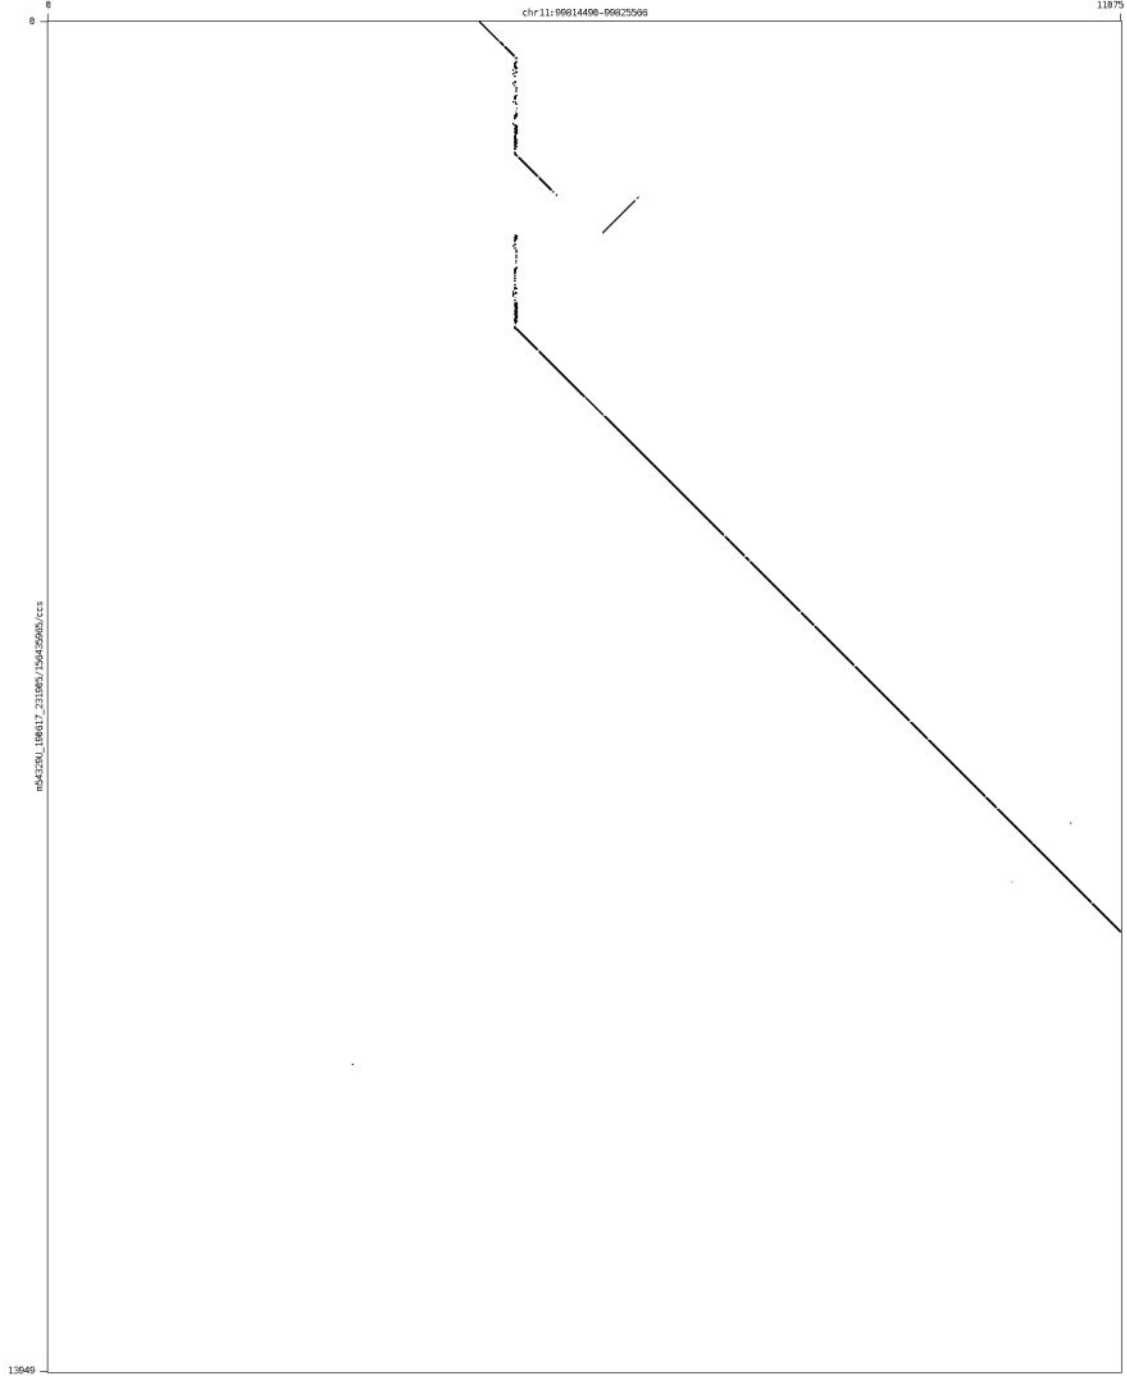

➤ chr11\_102731115\_102731273

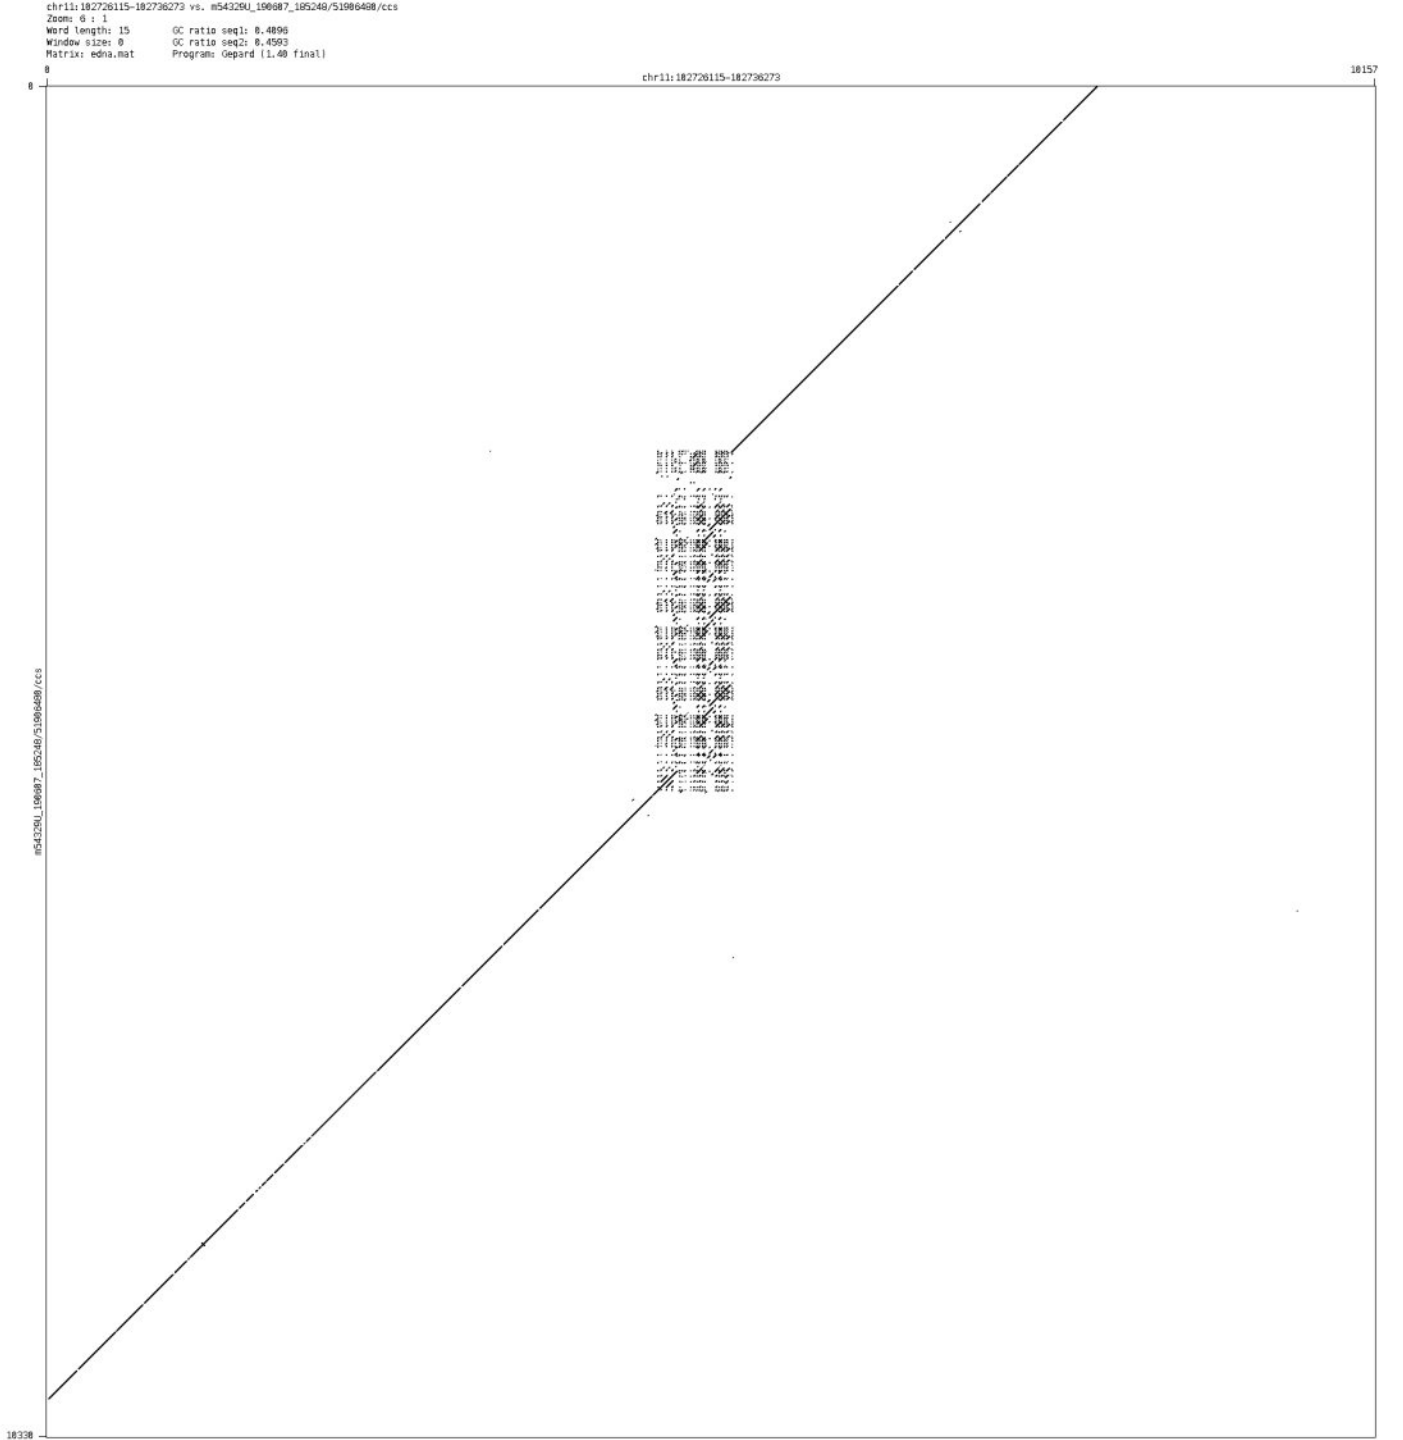

➤ chr11\_120328683\_120328976

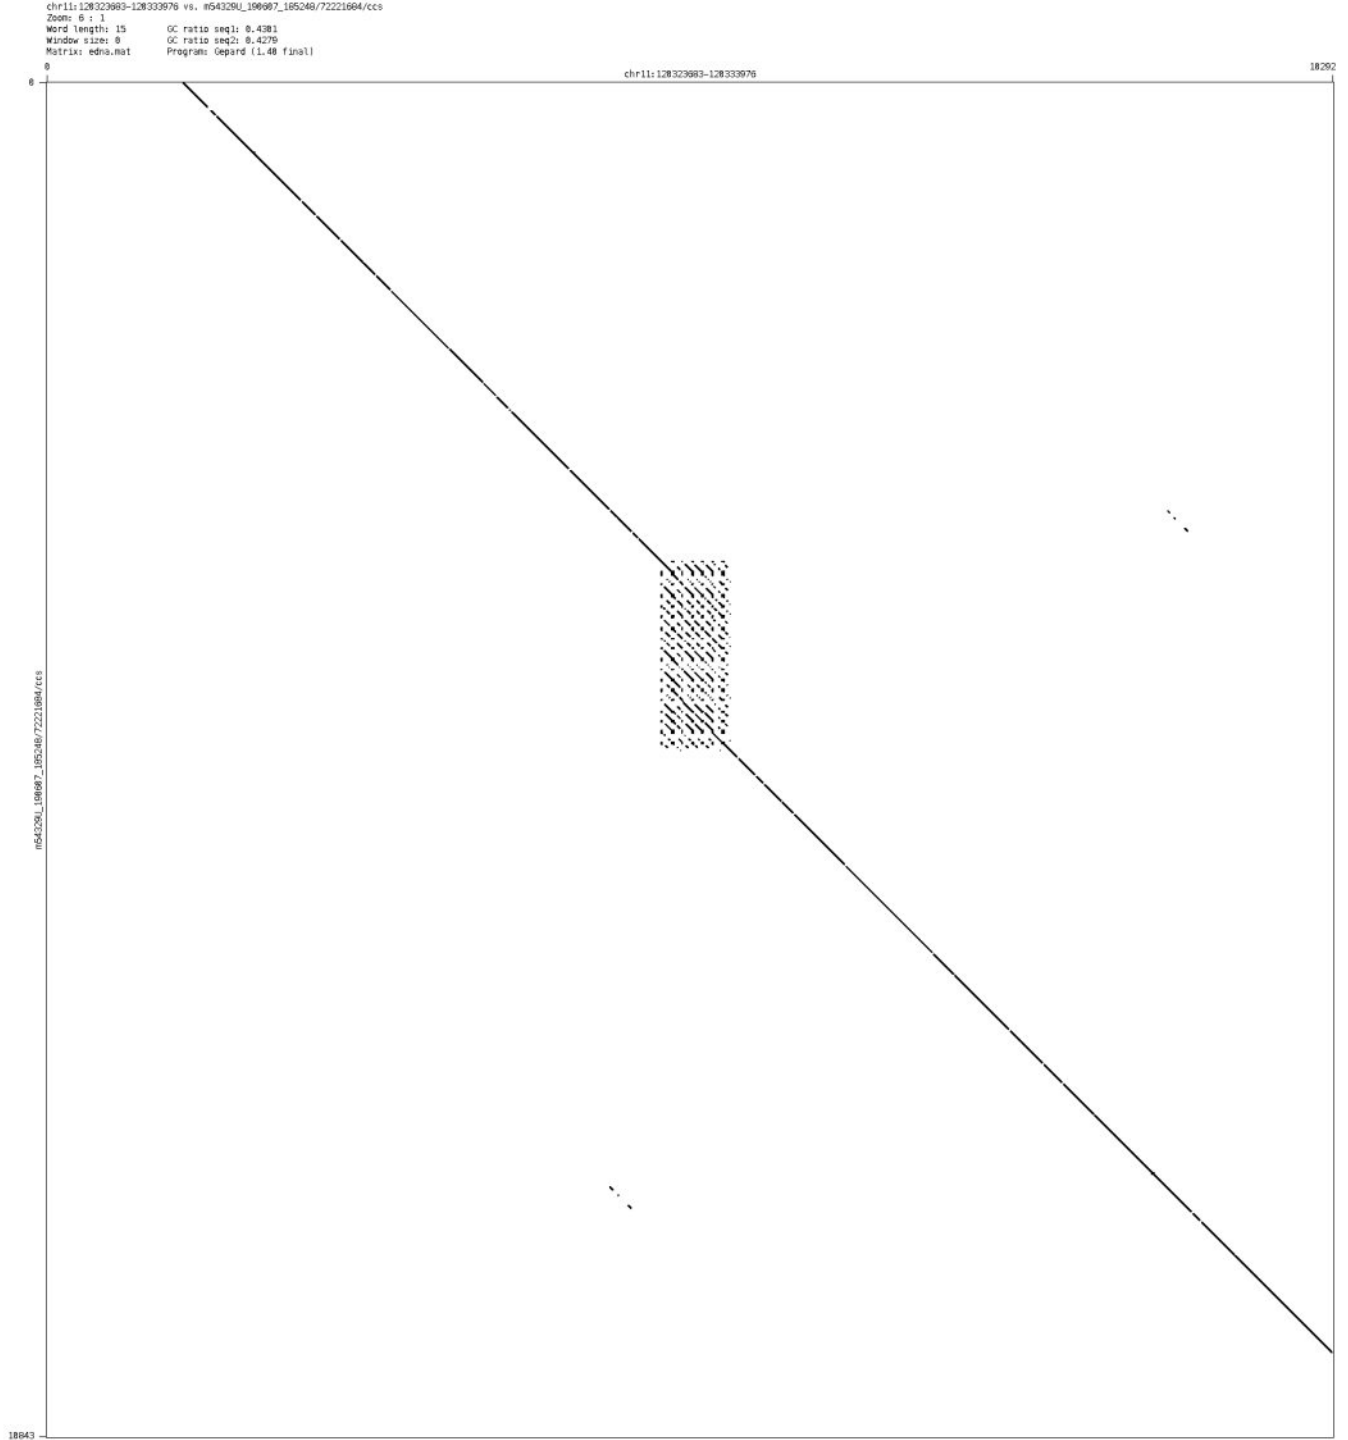

➤ chr11\_122016499\_122017716

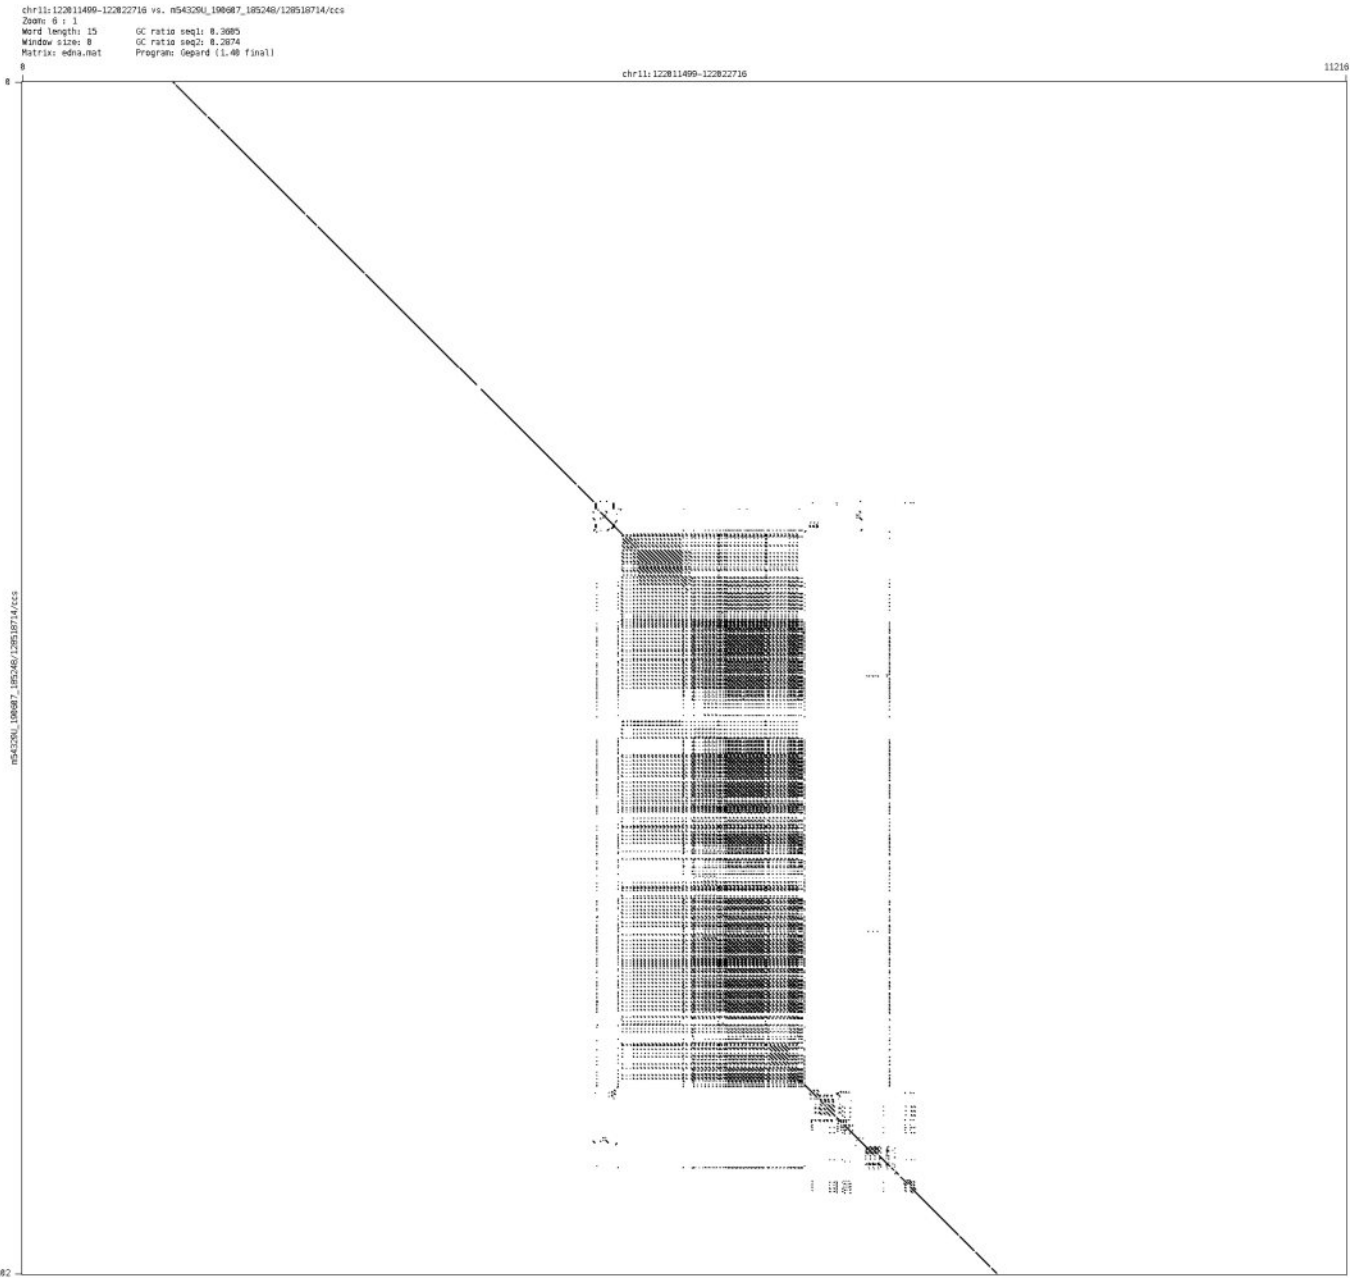

➤ chr11\_128930543\_128930892

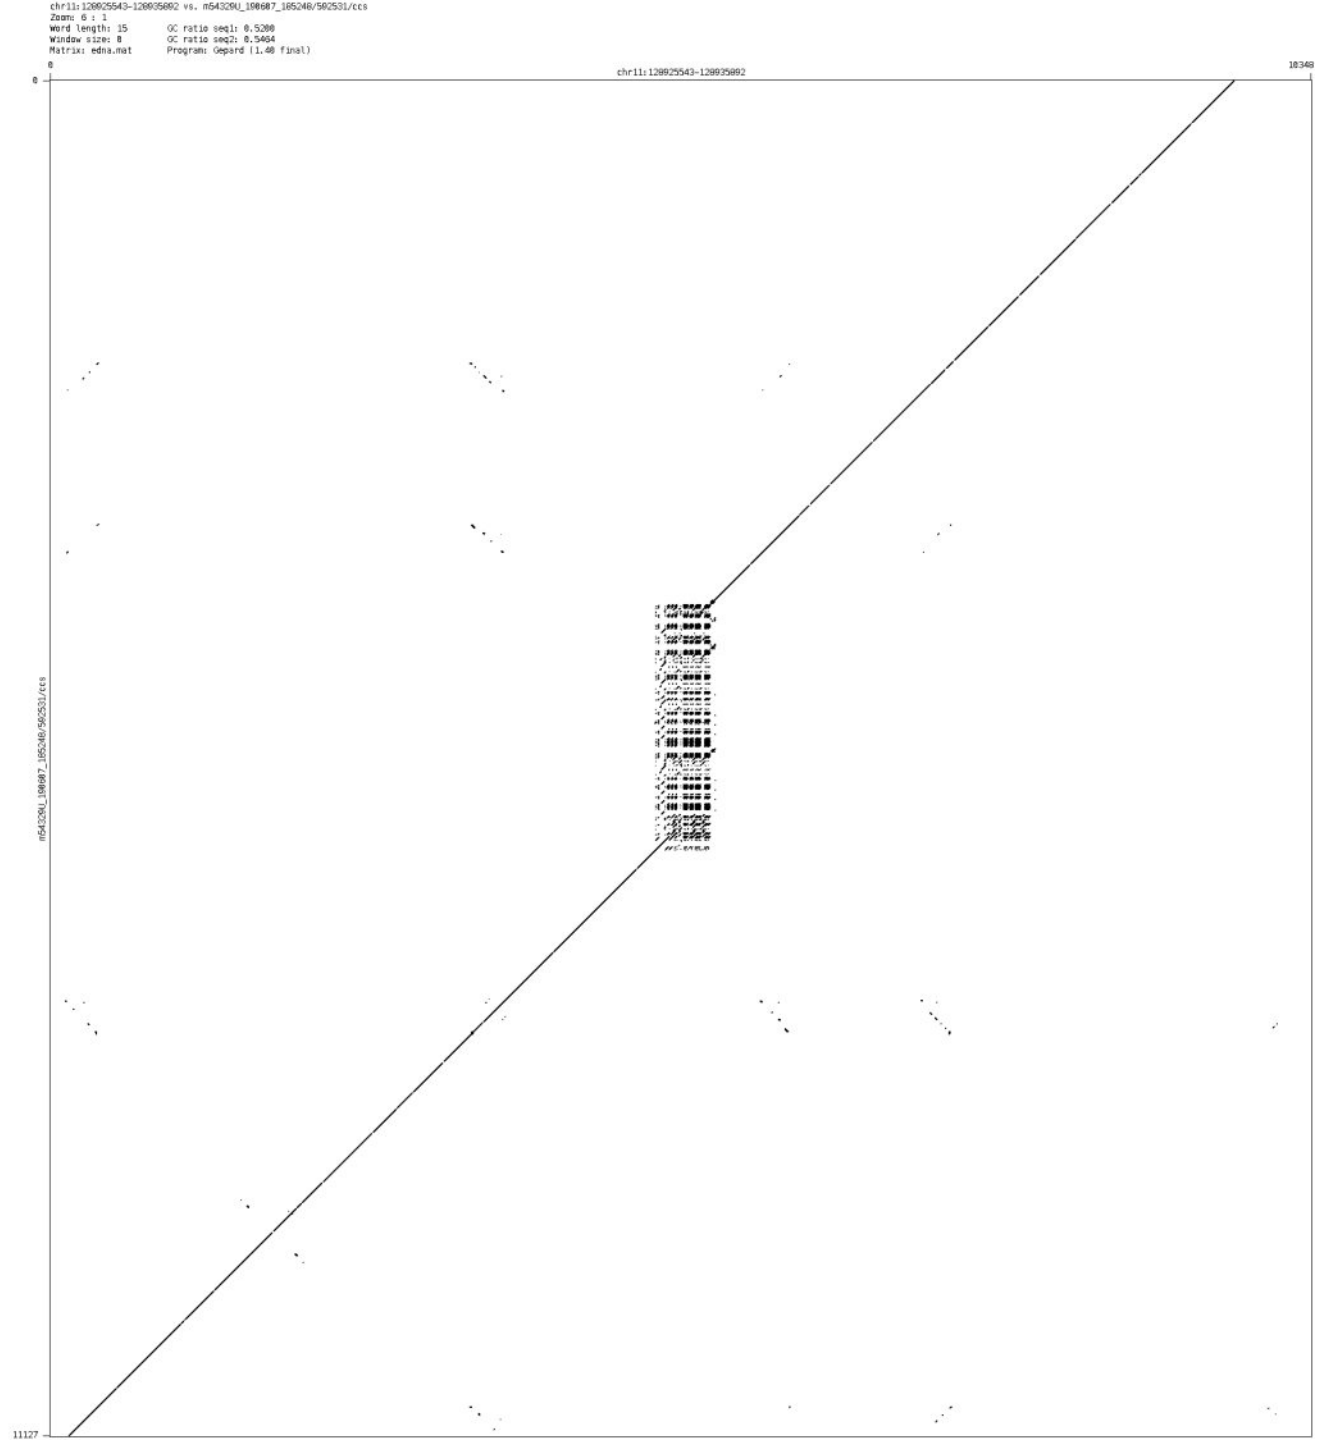

➤ chr11\_131680439\_131680801

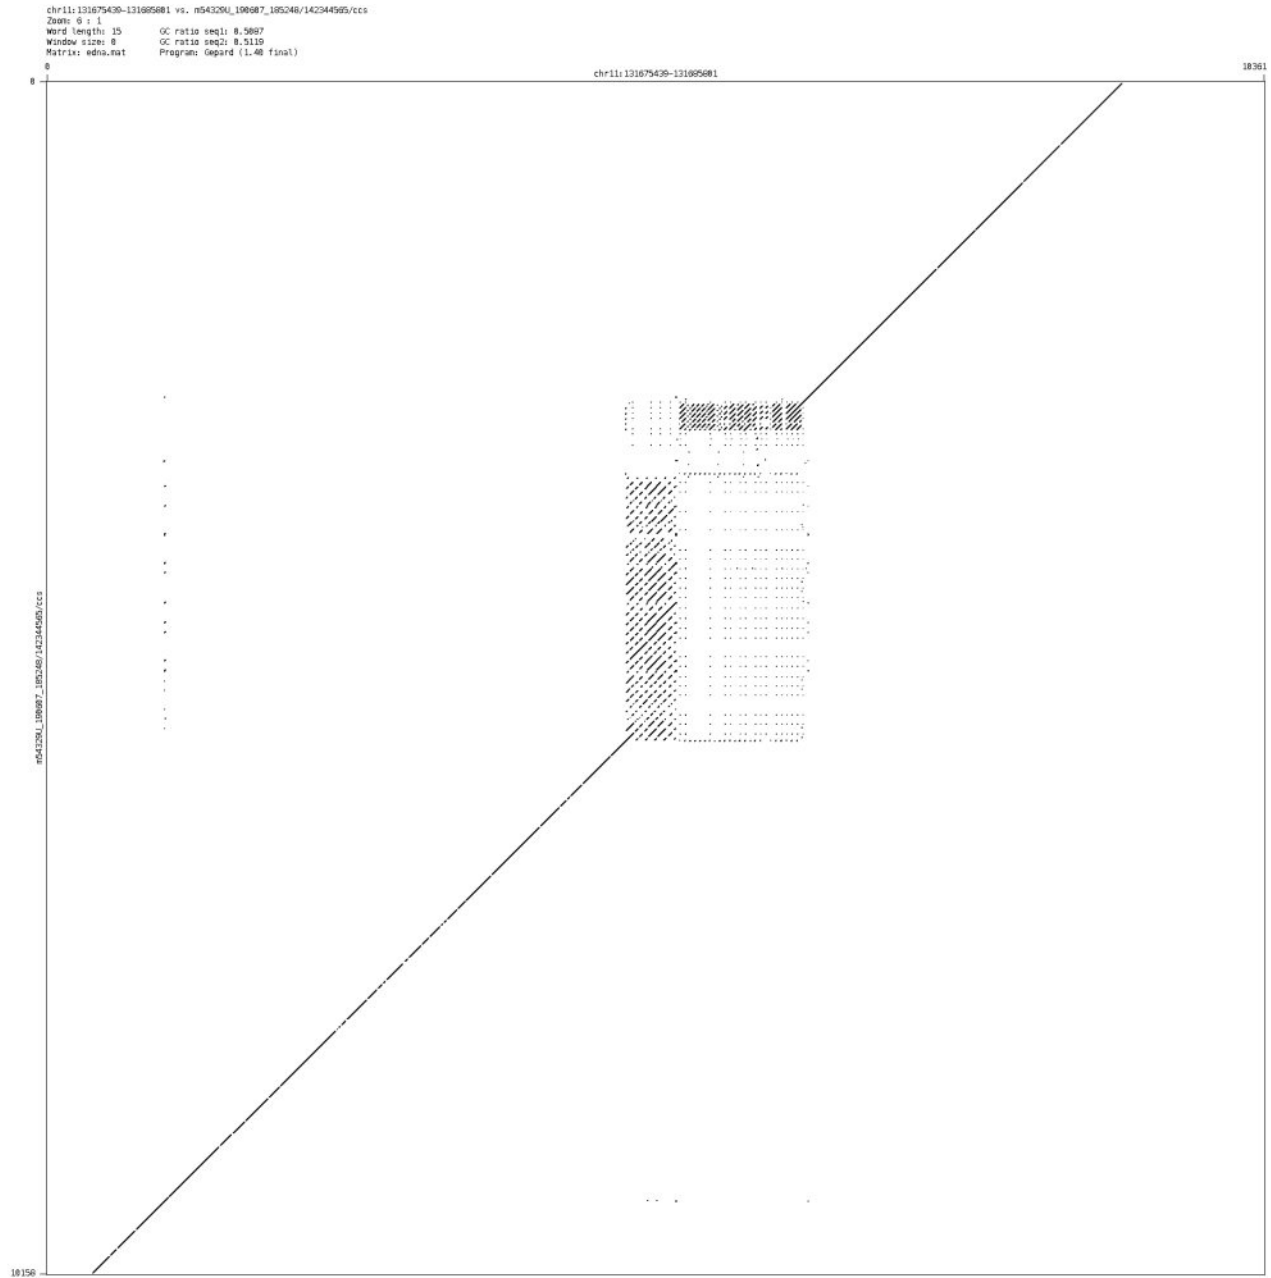

➤ chr11\_133354203\_133354263

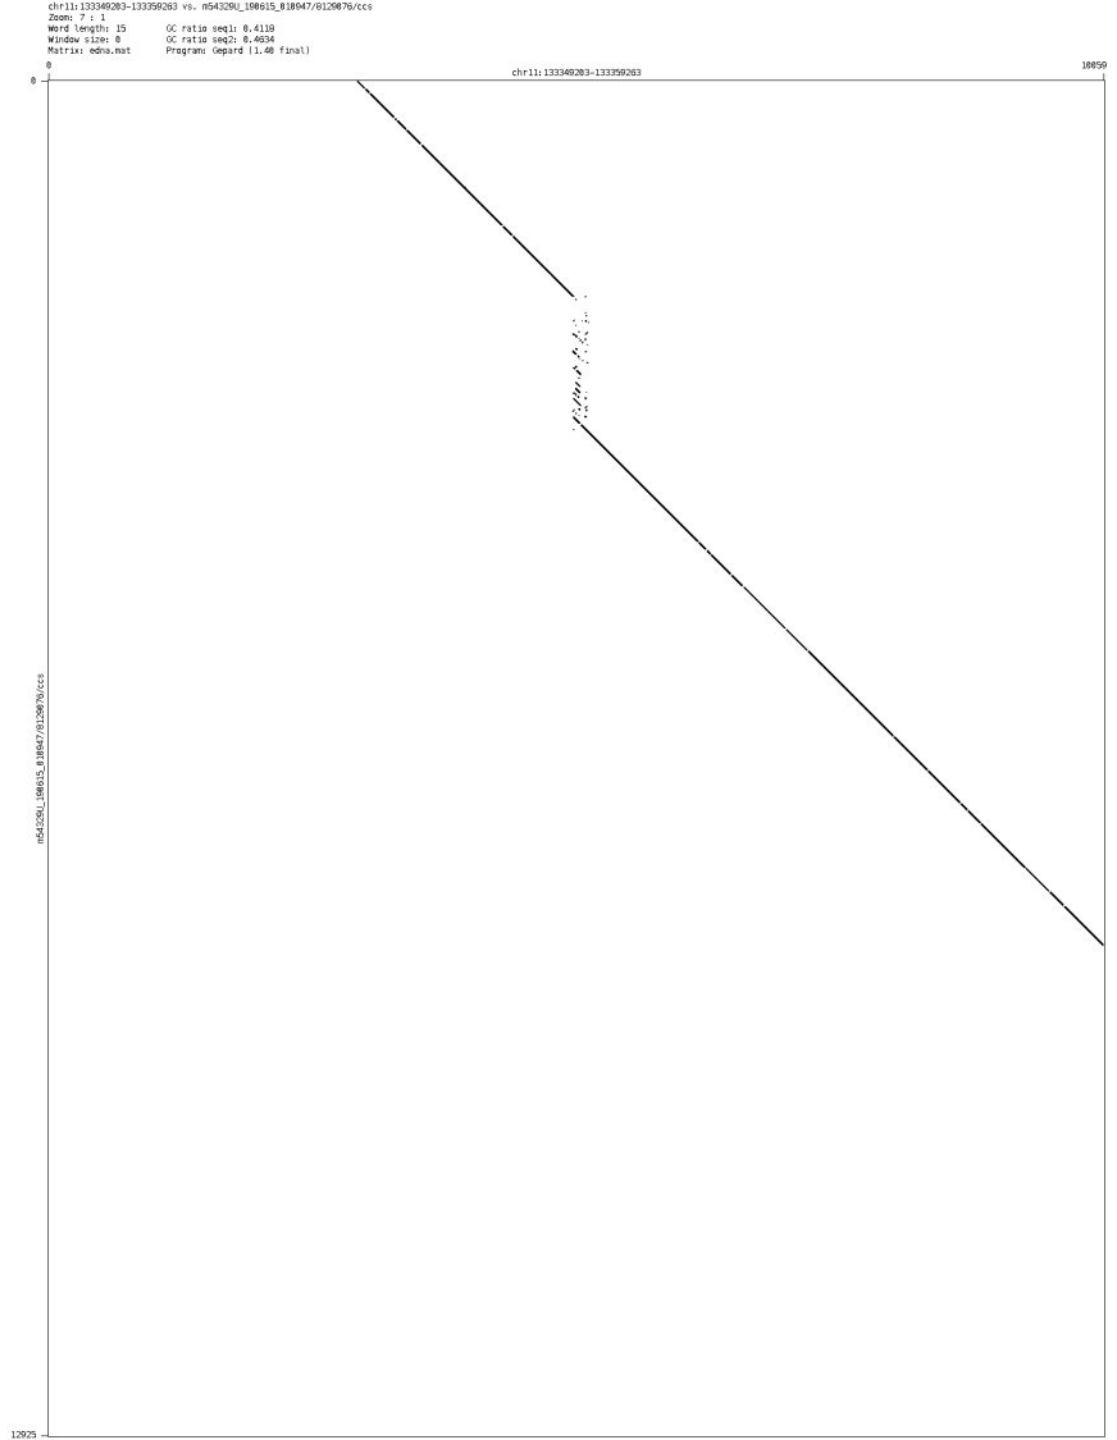



➤ chr11\_134308286\_134308429

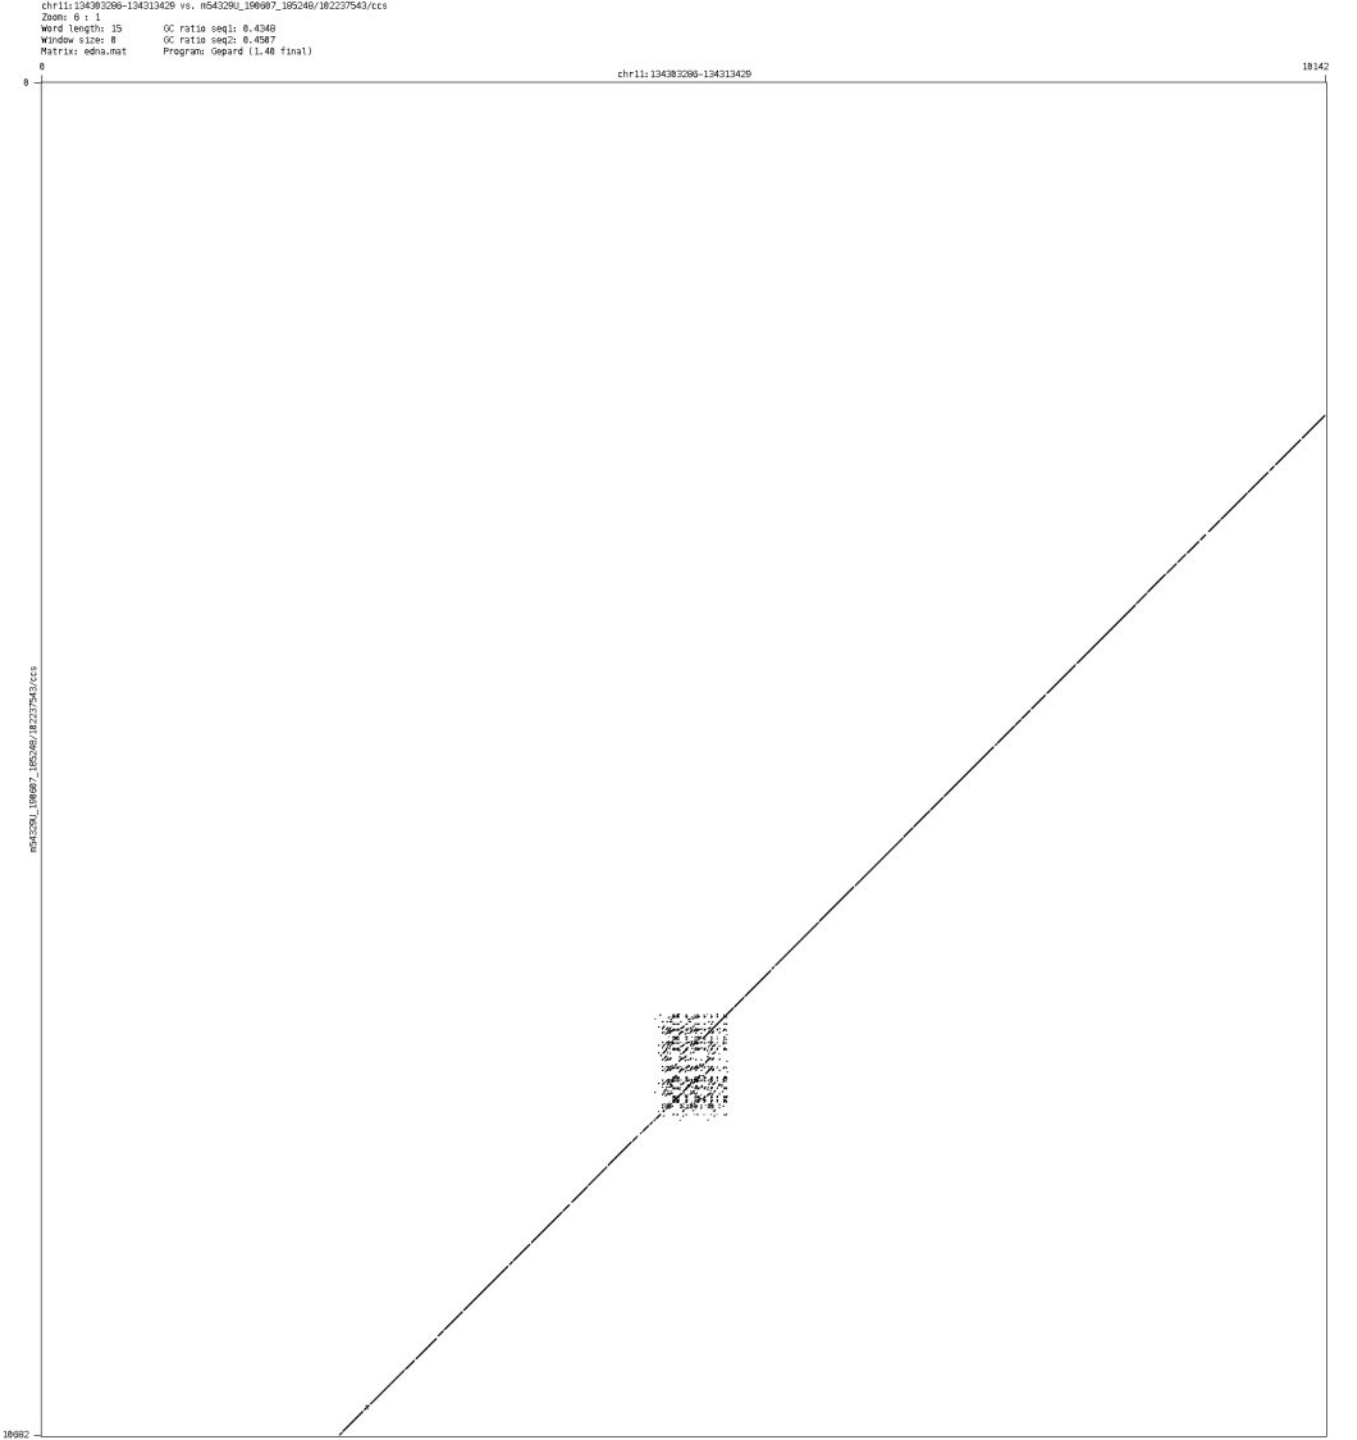

➤ chr12\_1574361\_1574528

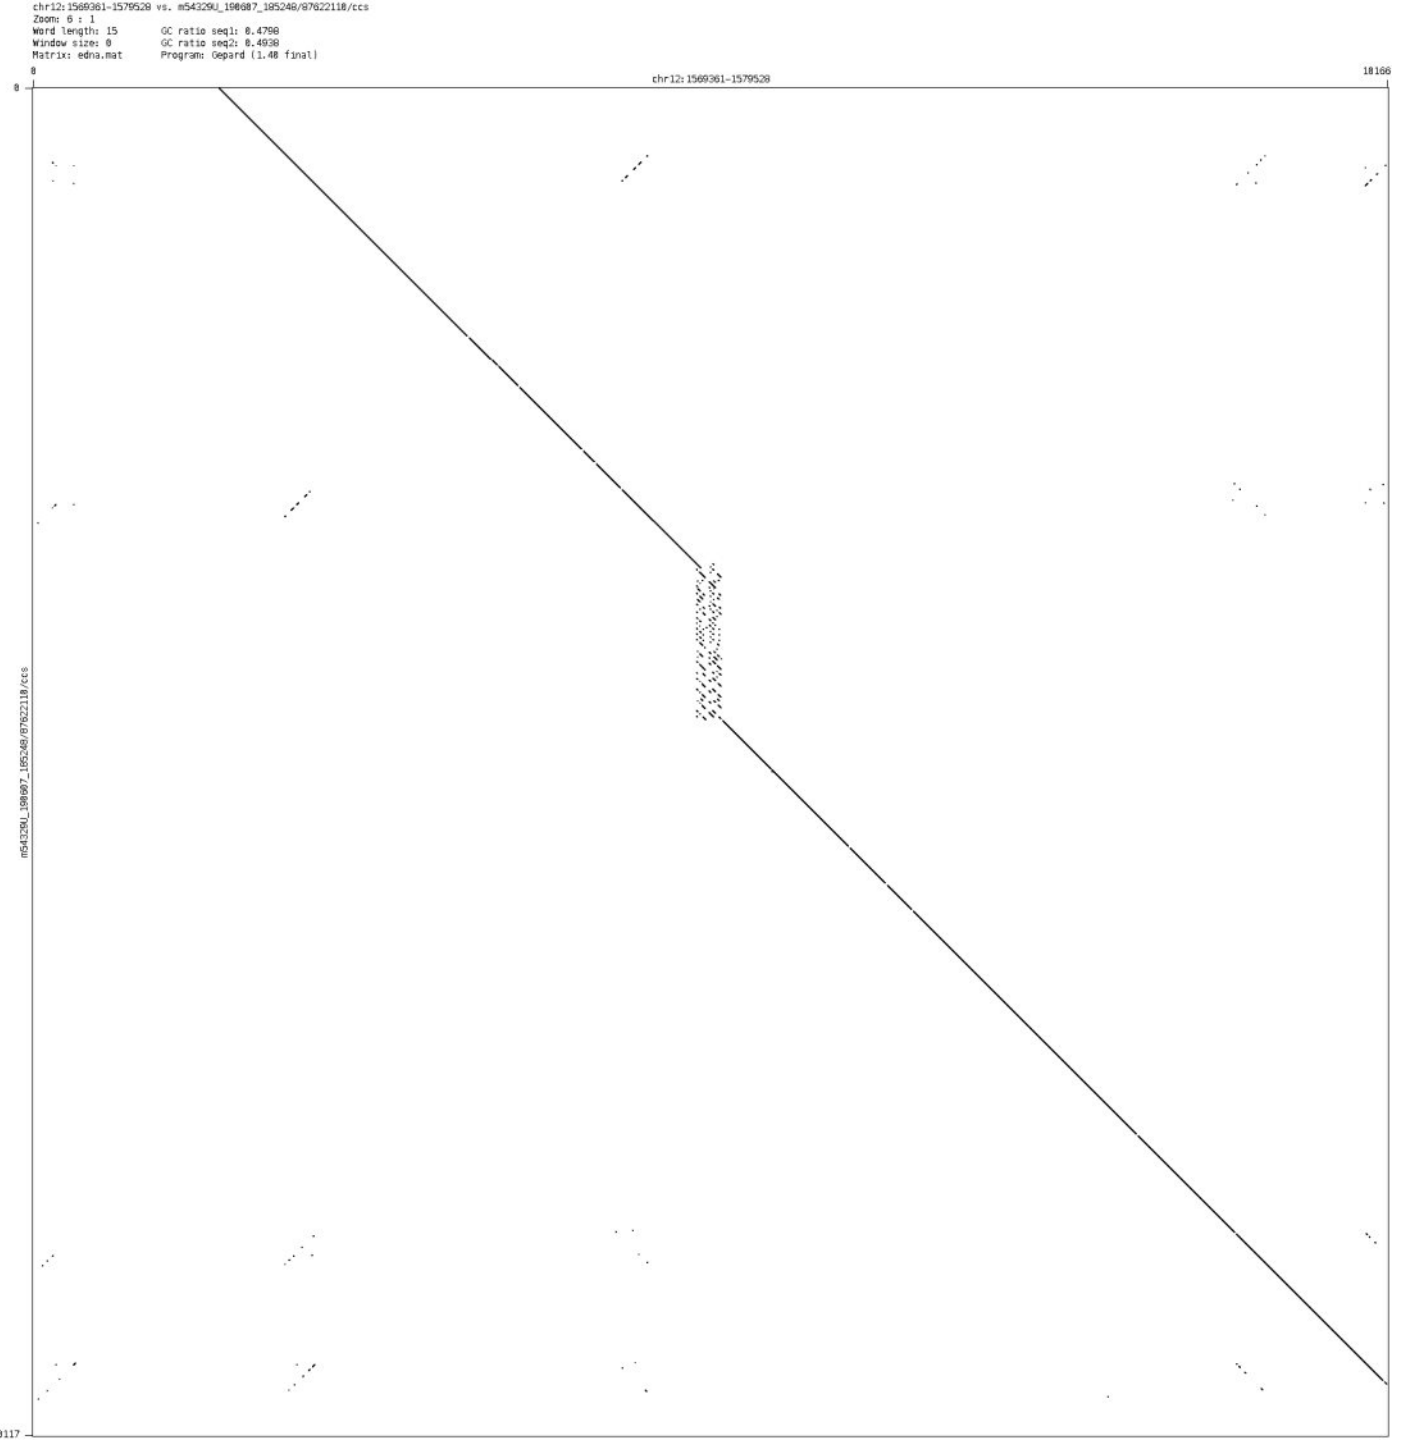

➤ chr12\_25106390\_25107673

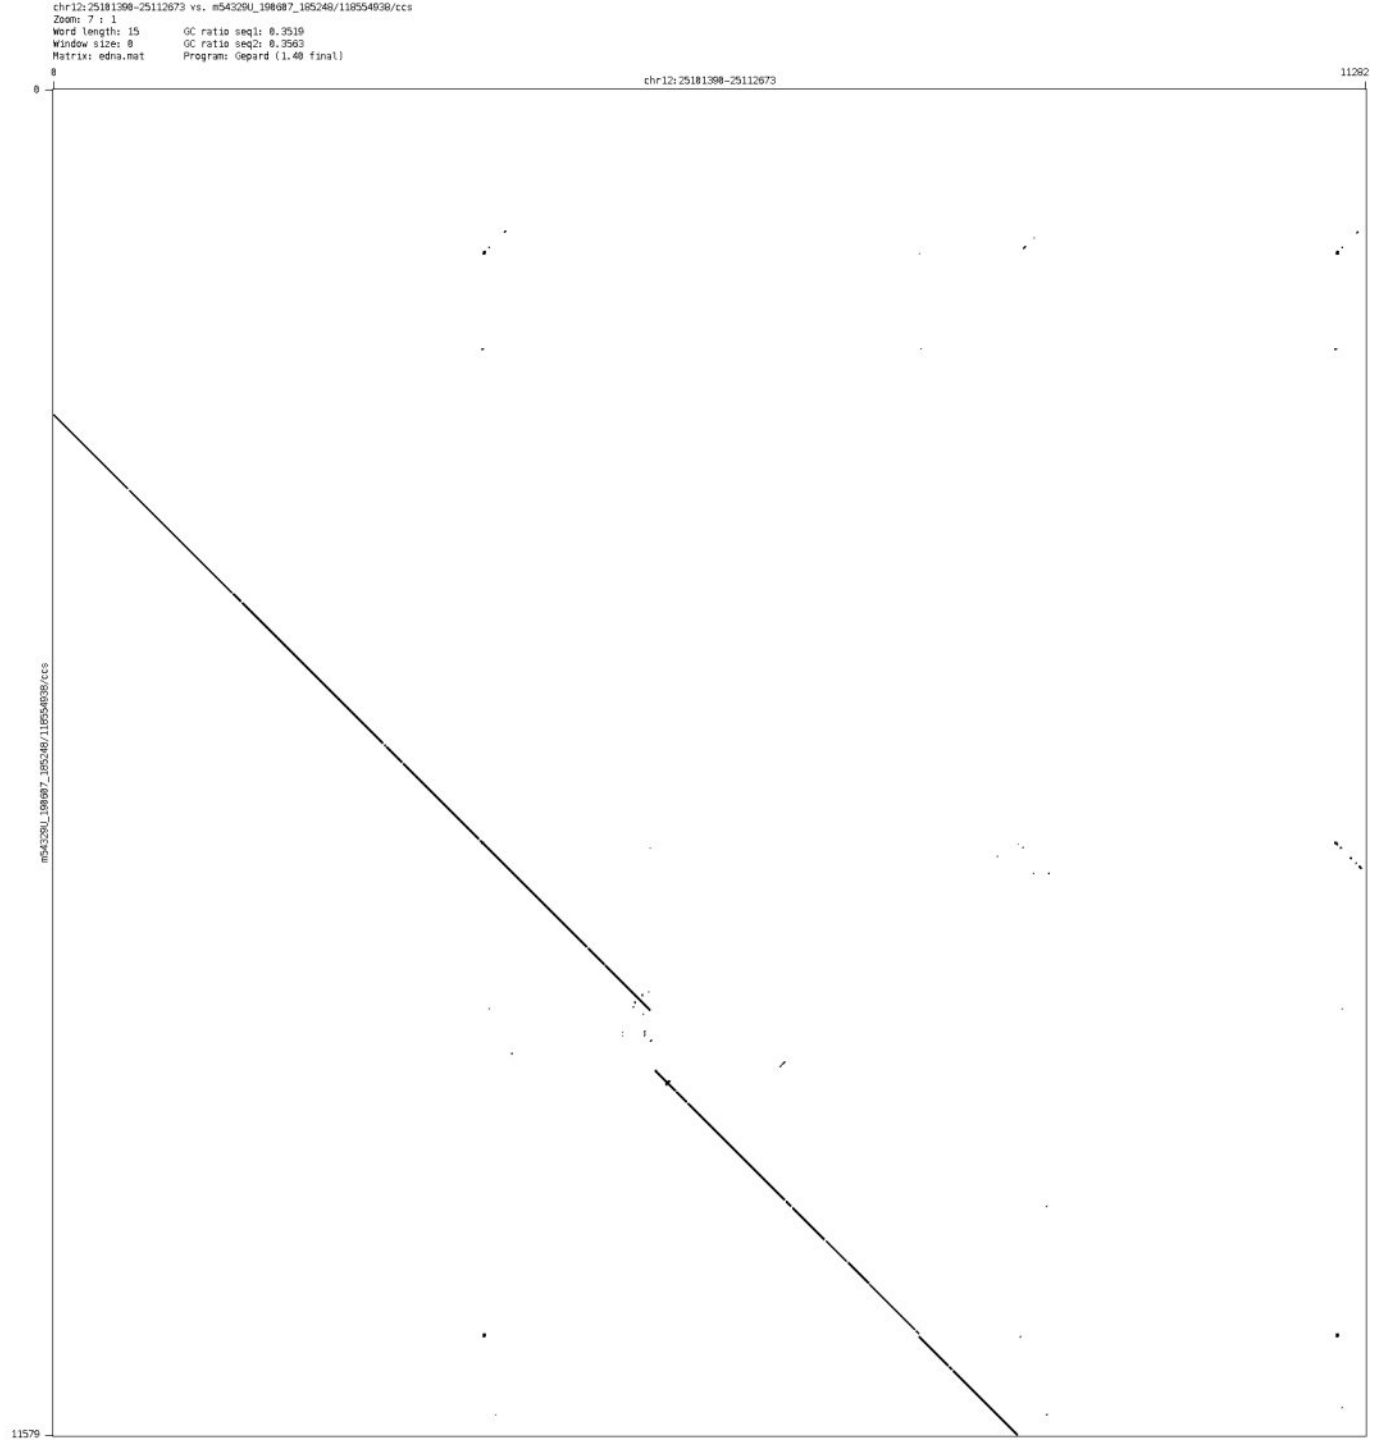

# ➤ chr12\_40480640\_40490425

chr12:40475640-40495425 vs. m54329U\_190607\_185248/97257760/ccs  
Zoom: 11 : 1  
Word length: 15 GC ratio seq1: 0.4448  
Window size: 0 GC ratio seq2: 0.4060  
Matrix: edna.mat Program: Gepard (1.40 final)

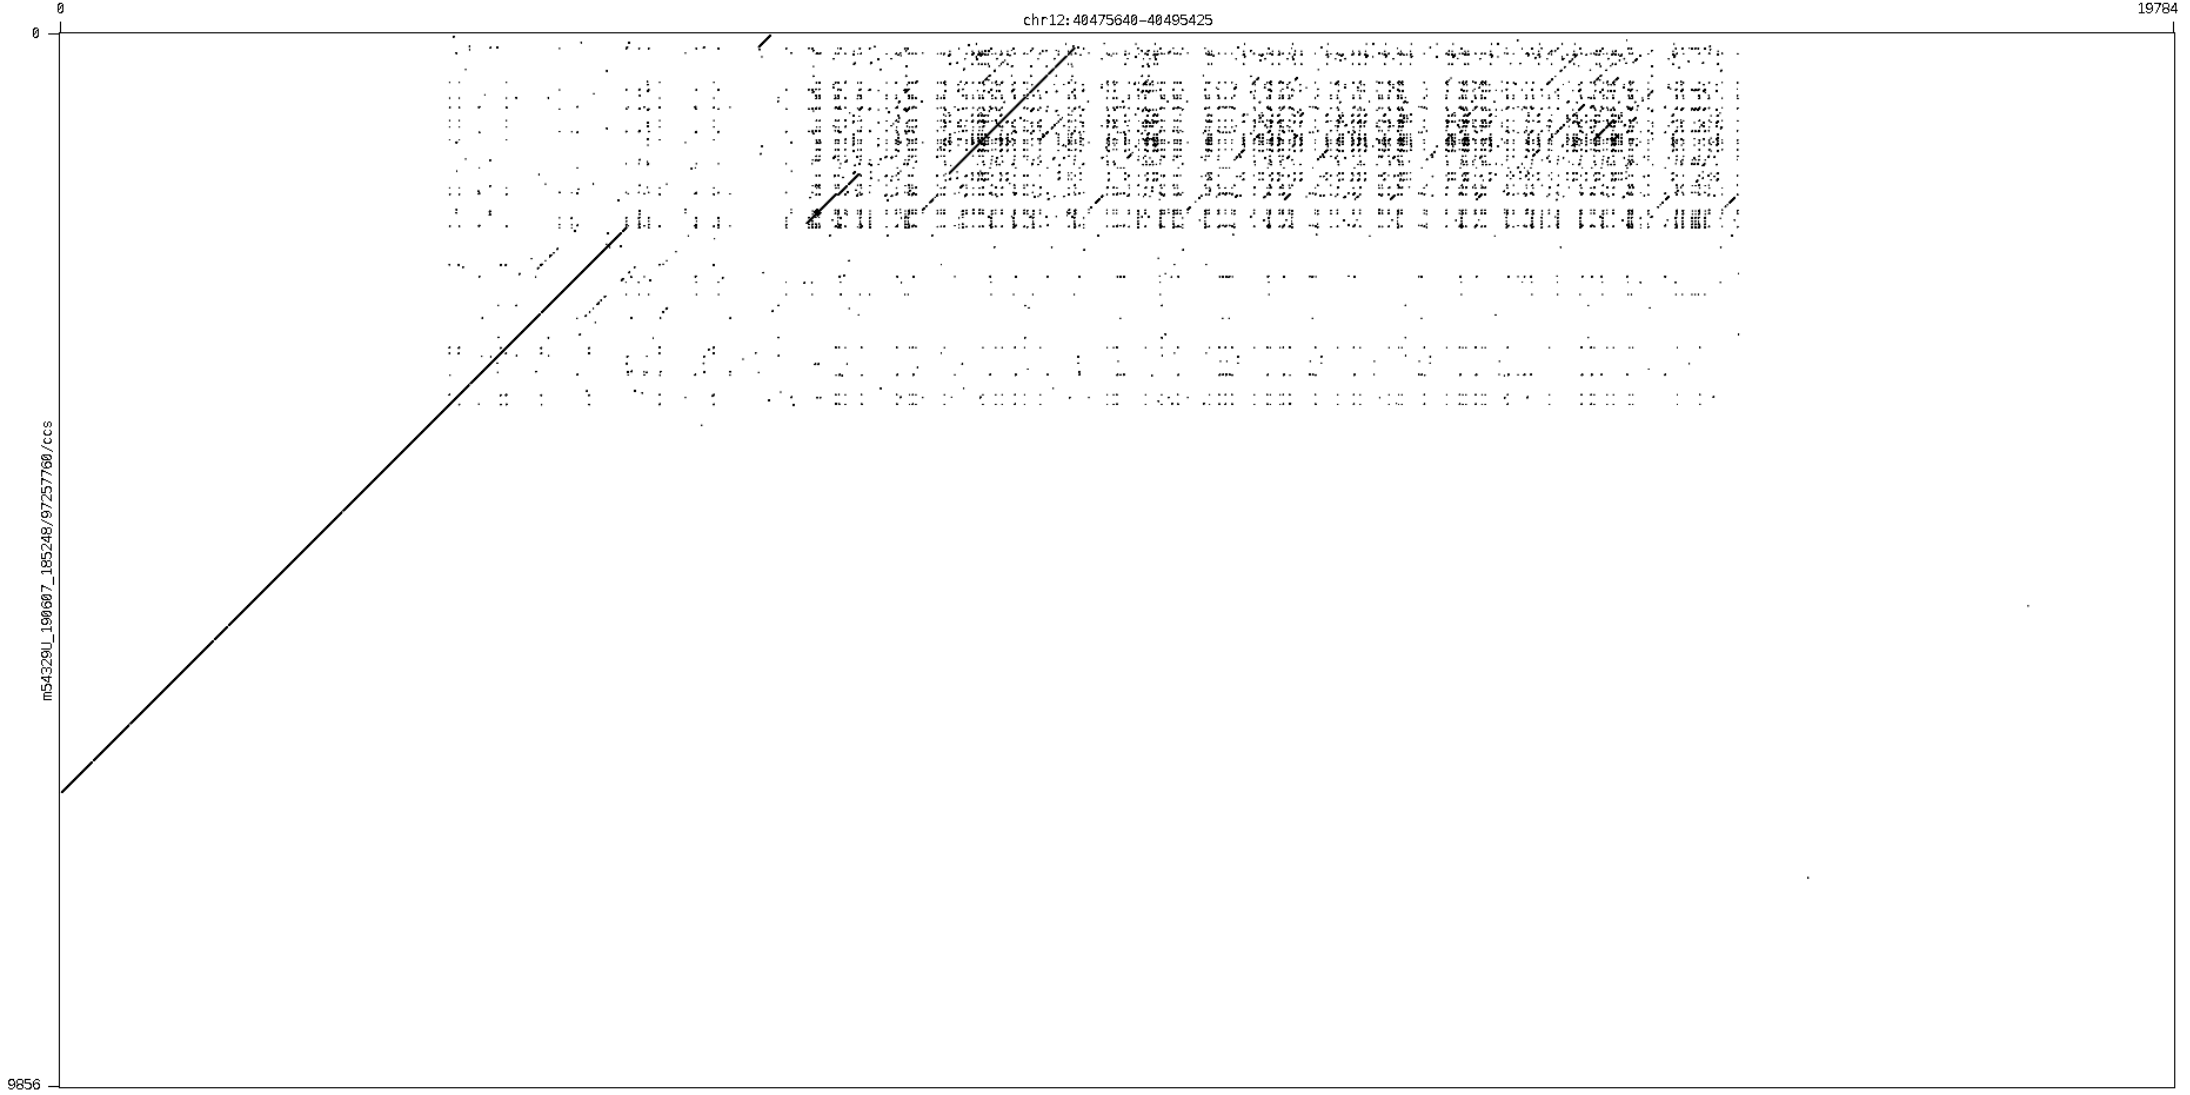

➤ chr12\_65424697\_65425168

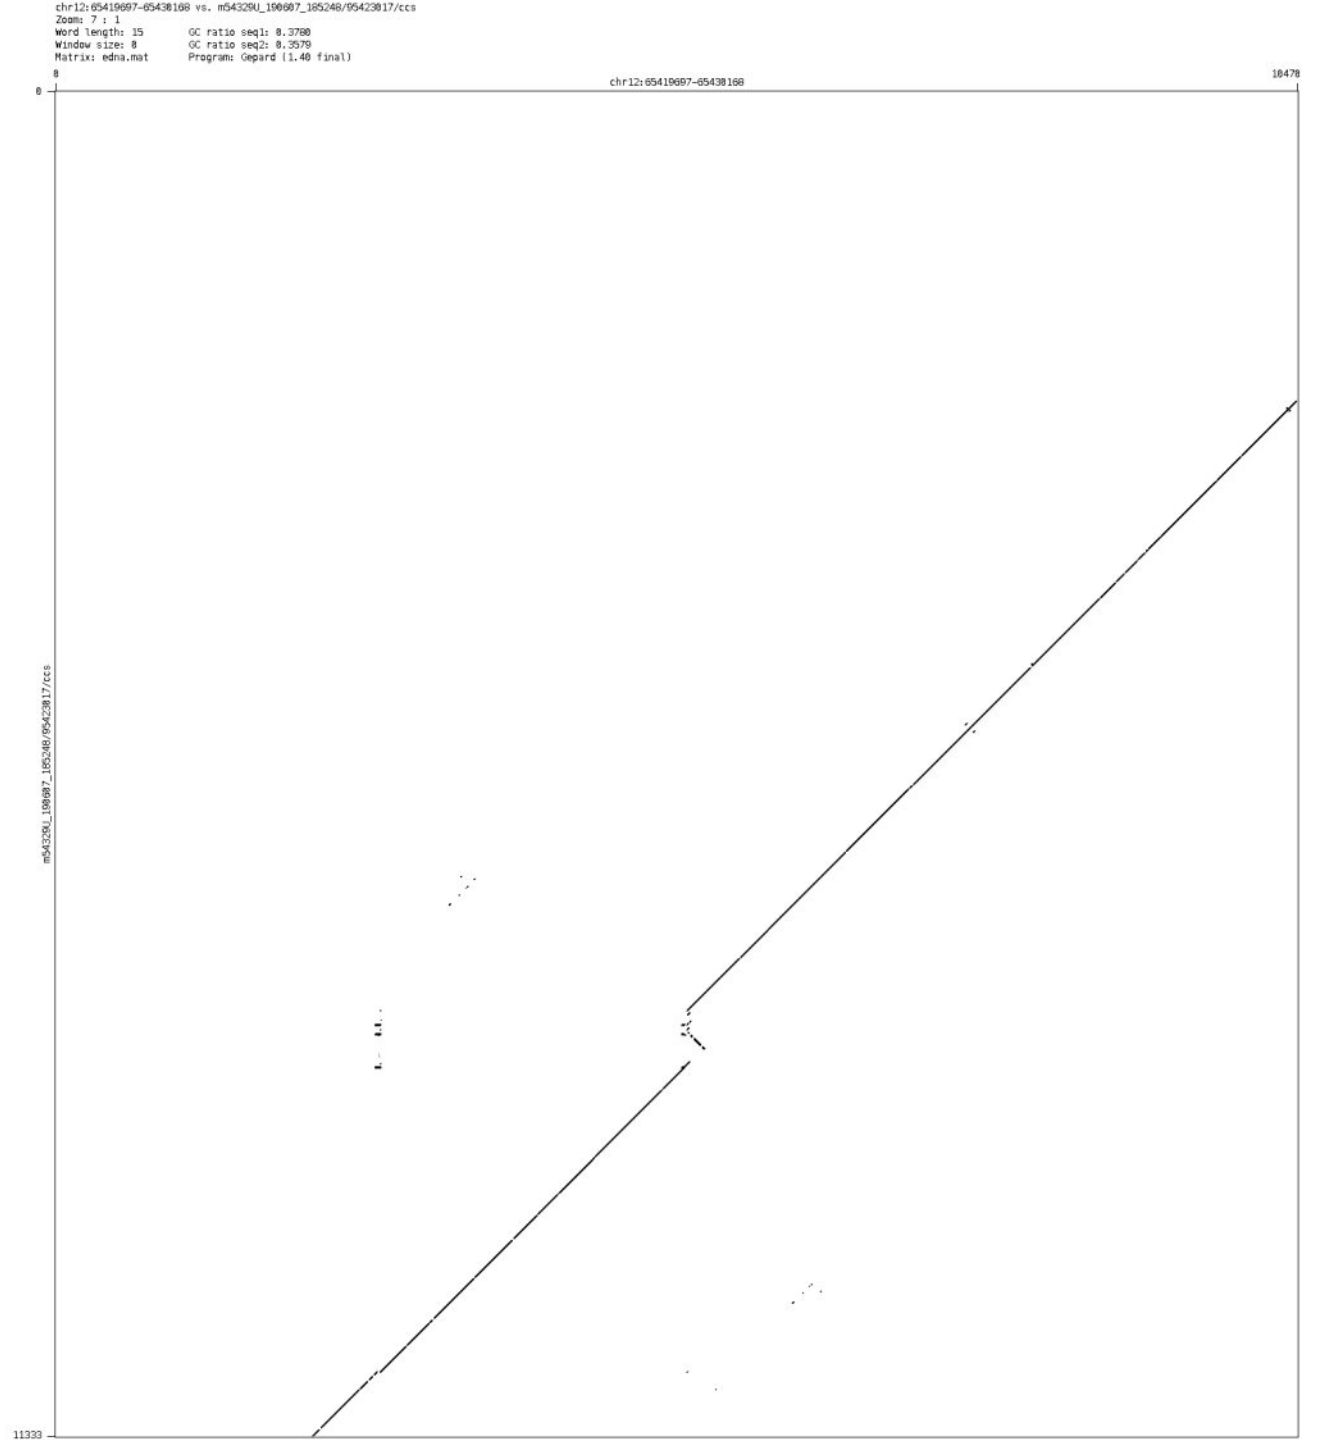

➤ chr12\_71315482\_71316928

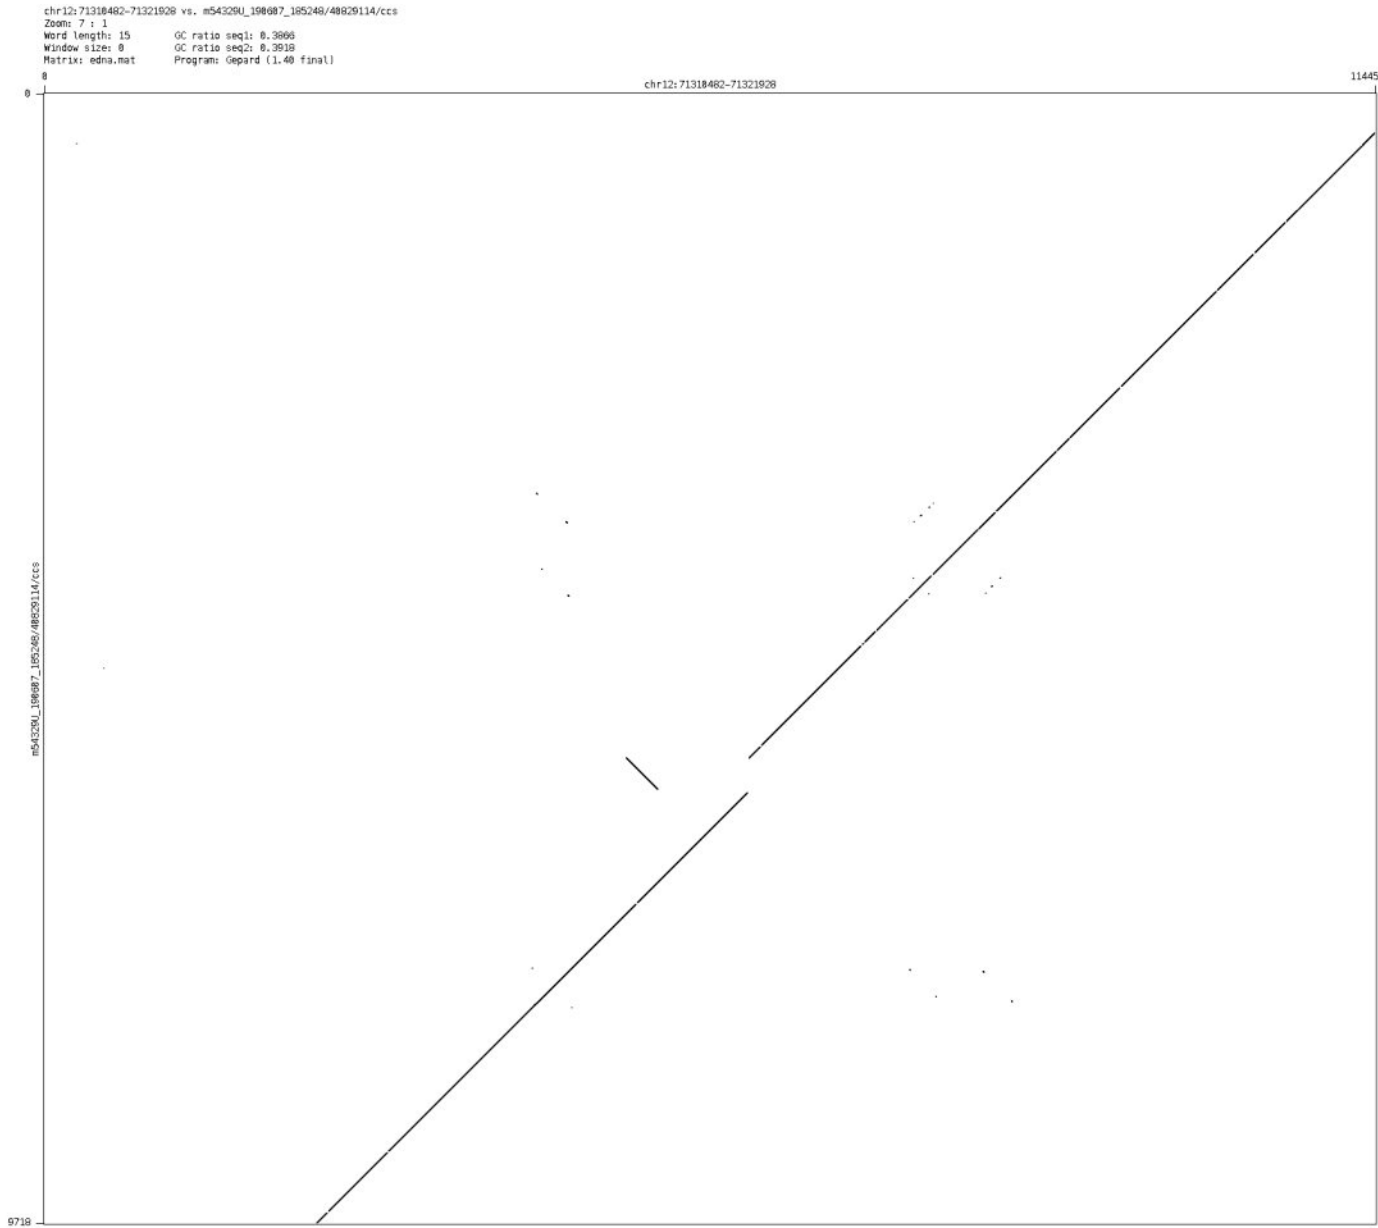

➤ chr12\_77989900\_77994324

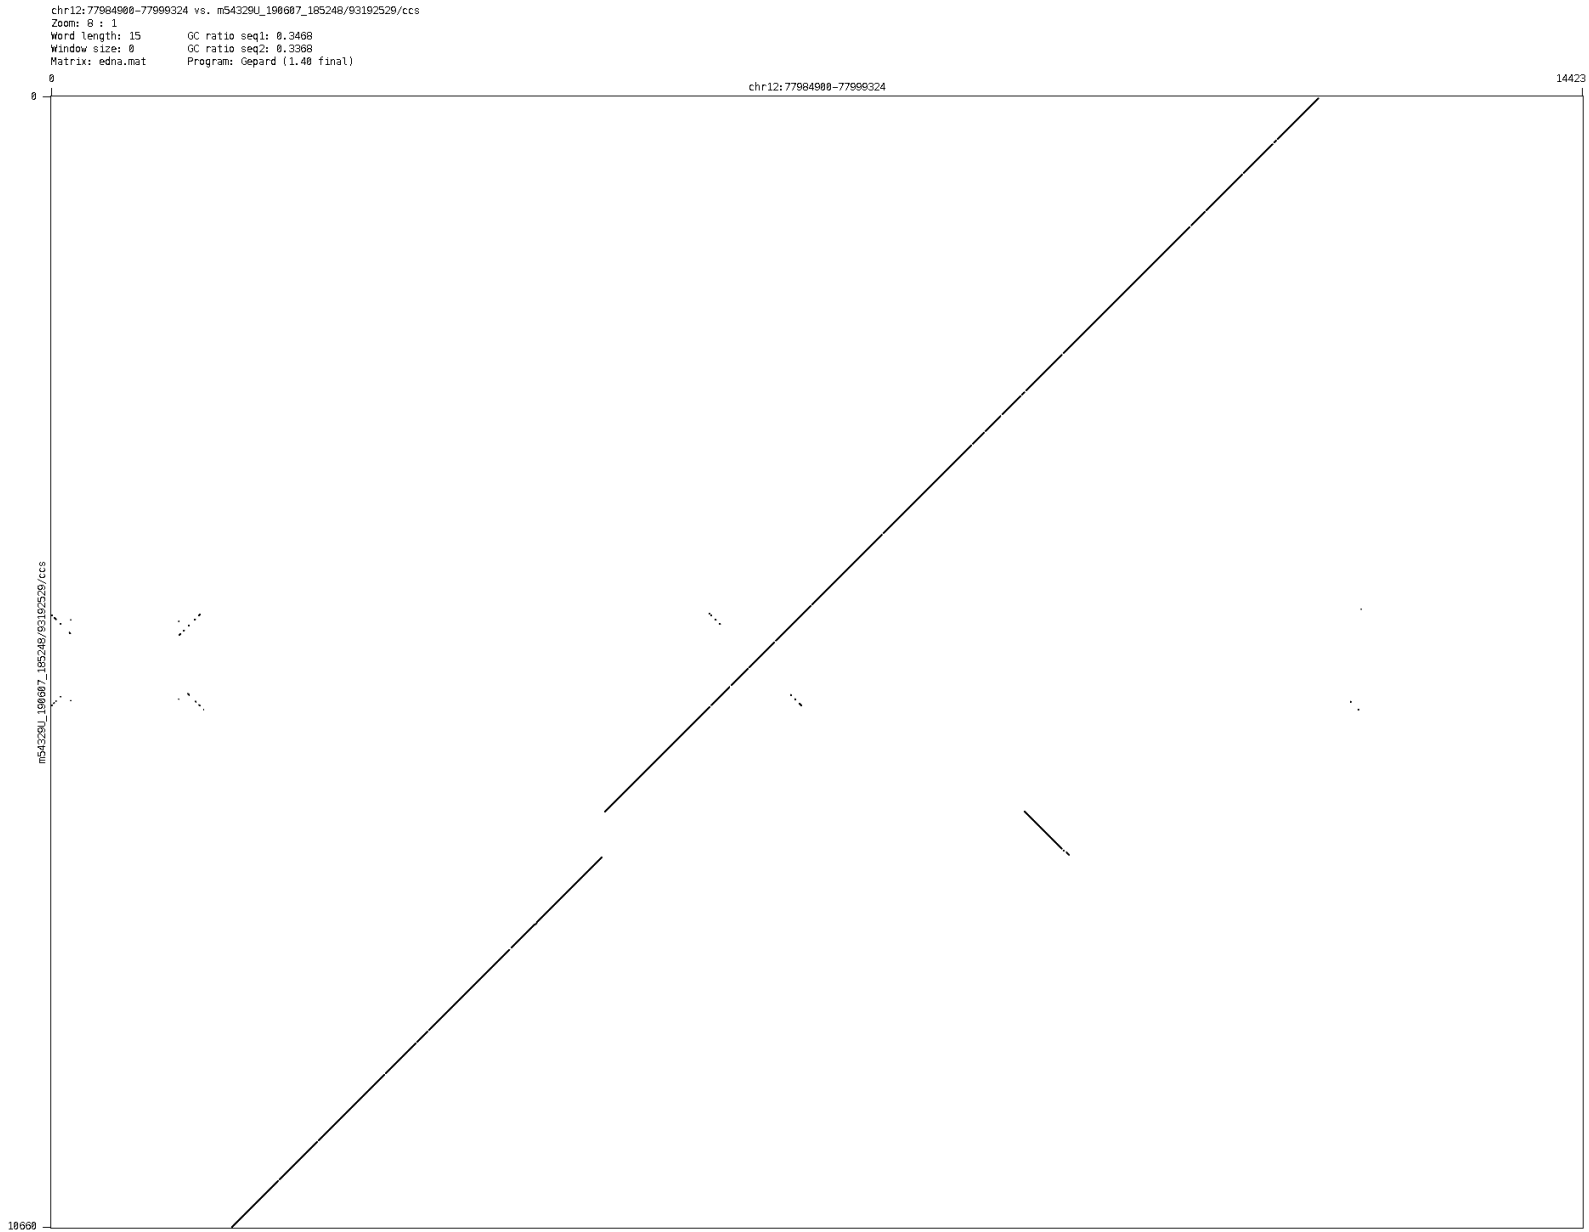

➤ chr12\_86810684\_86812040

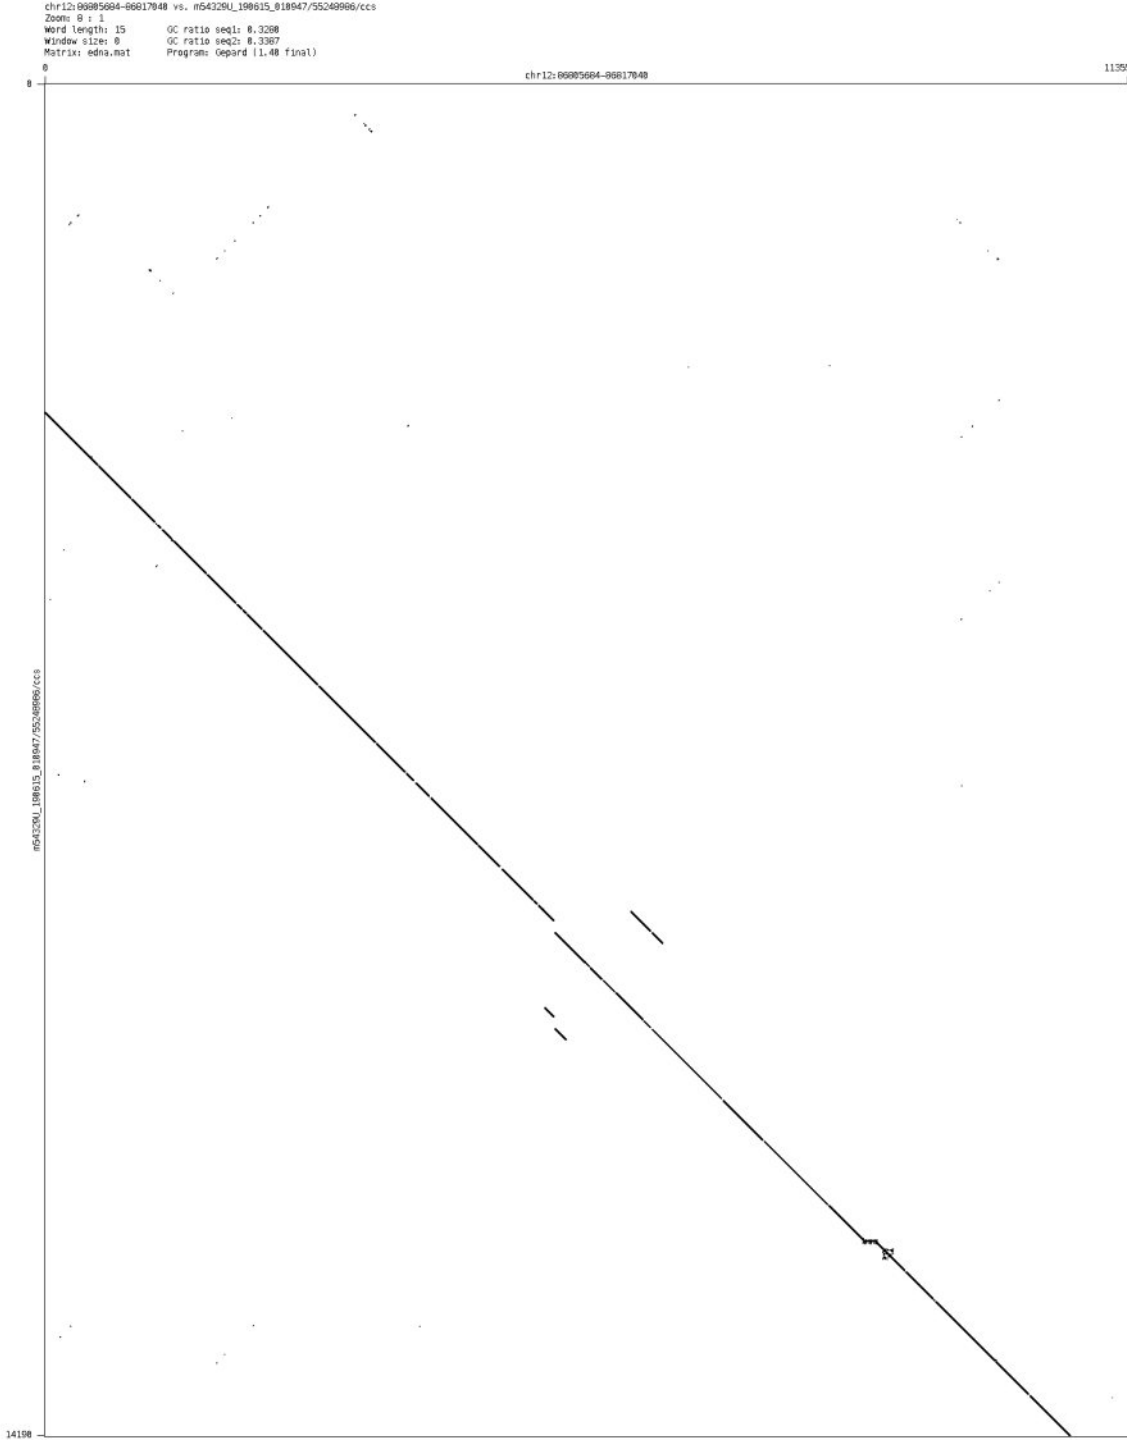



➤ chr12\_109661571\_109661755

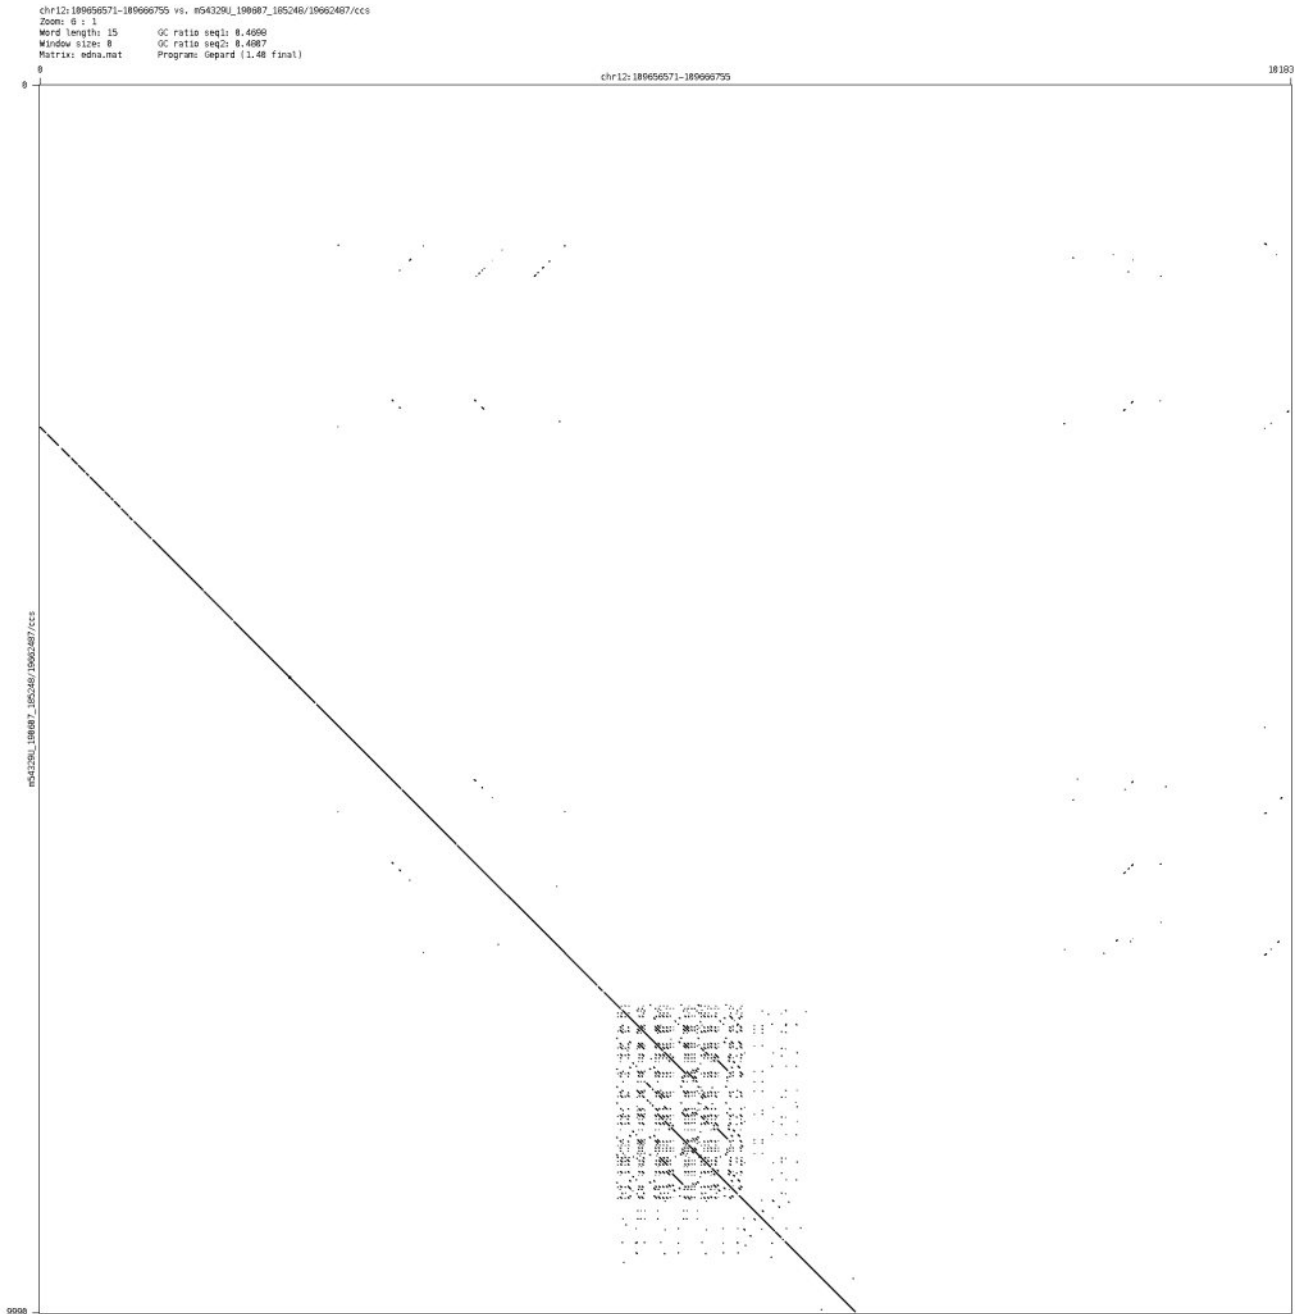

➤ chr12\_115639648\_115642432

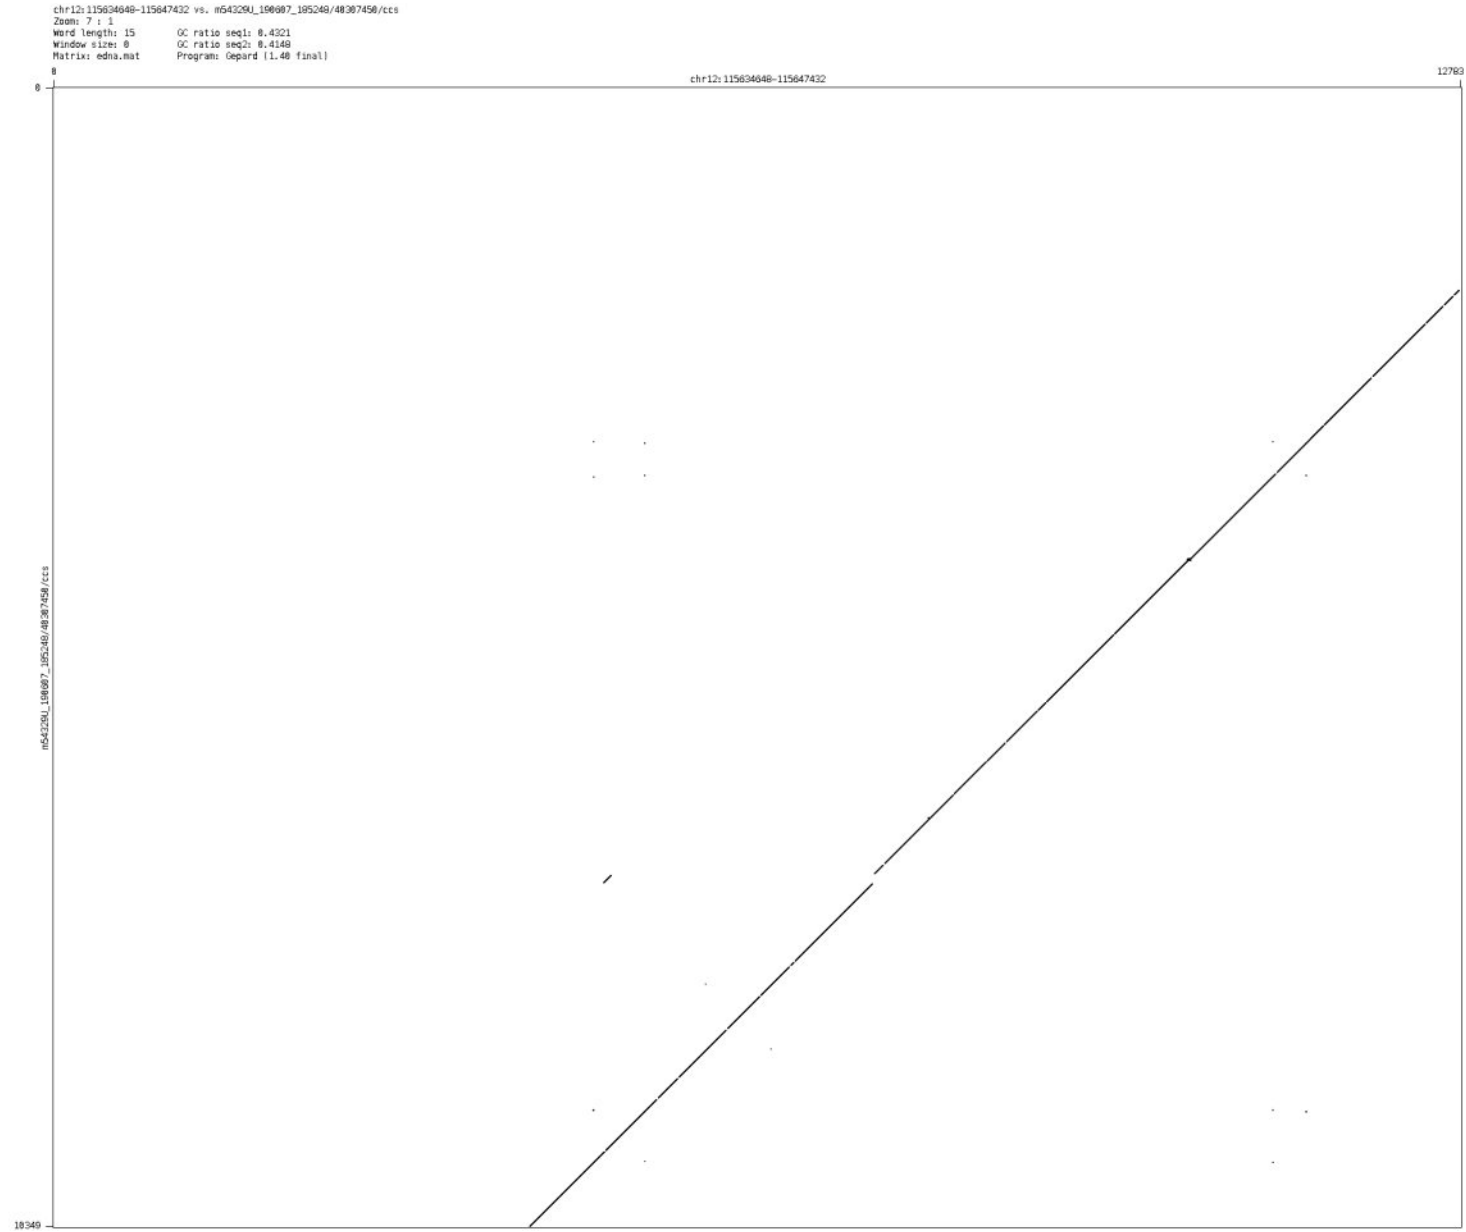

➤ chr12\_120927507\_120928364

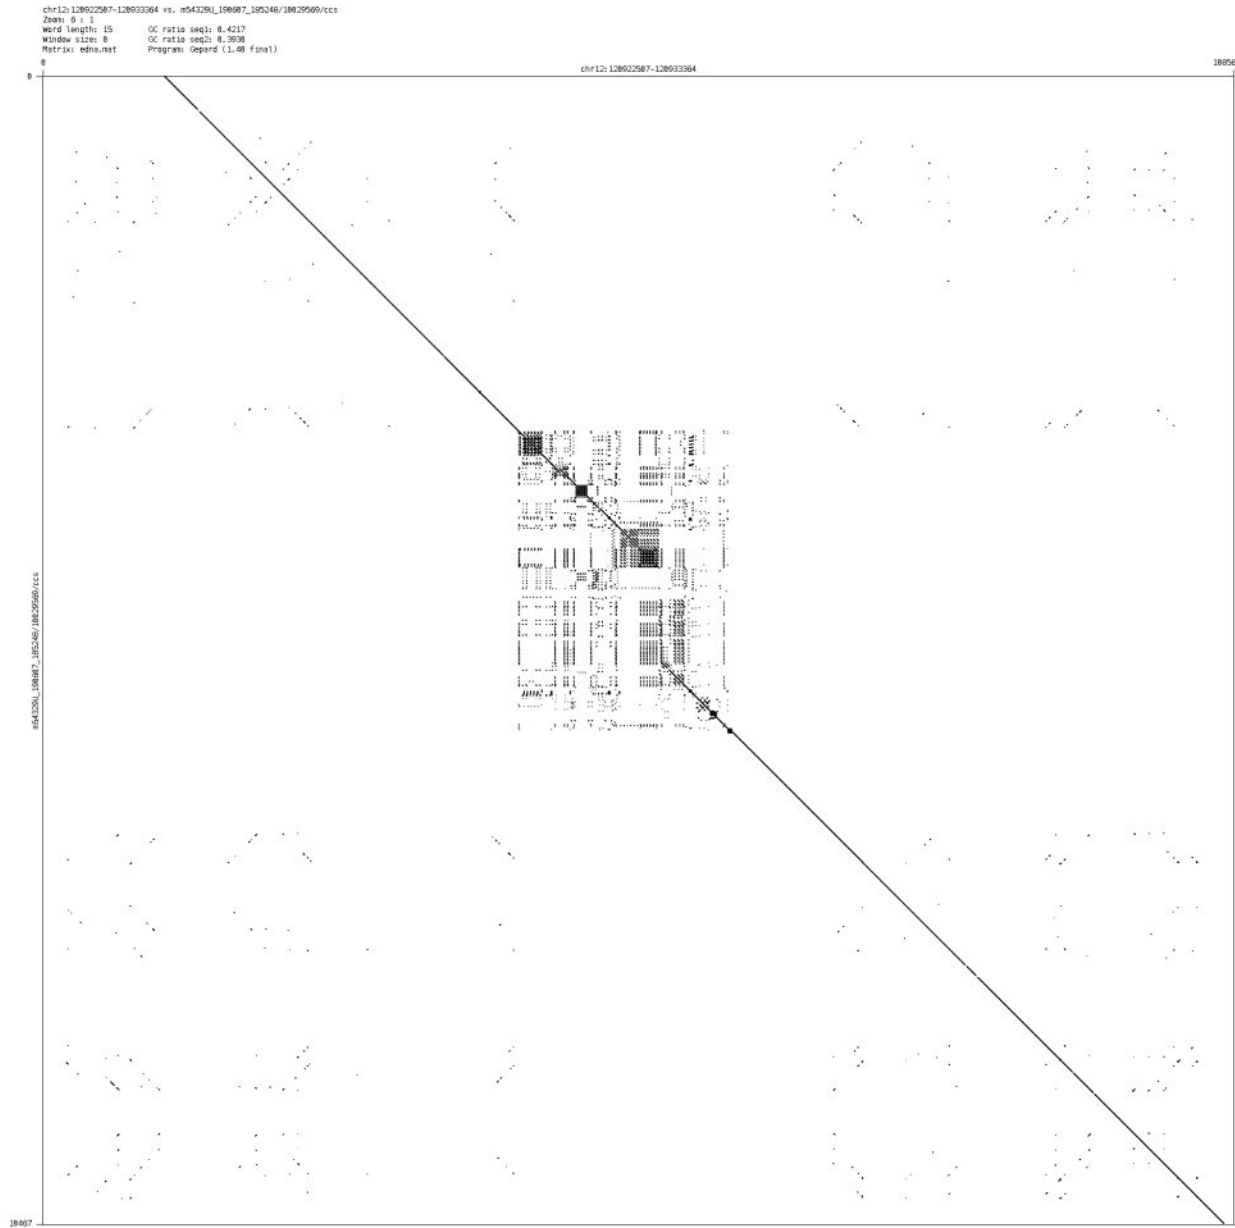

➤ chr12\_124438819\_124439422

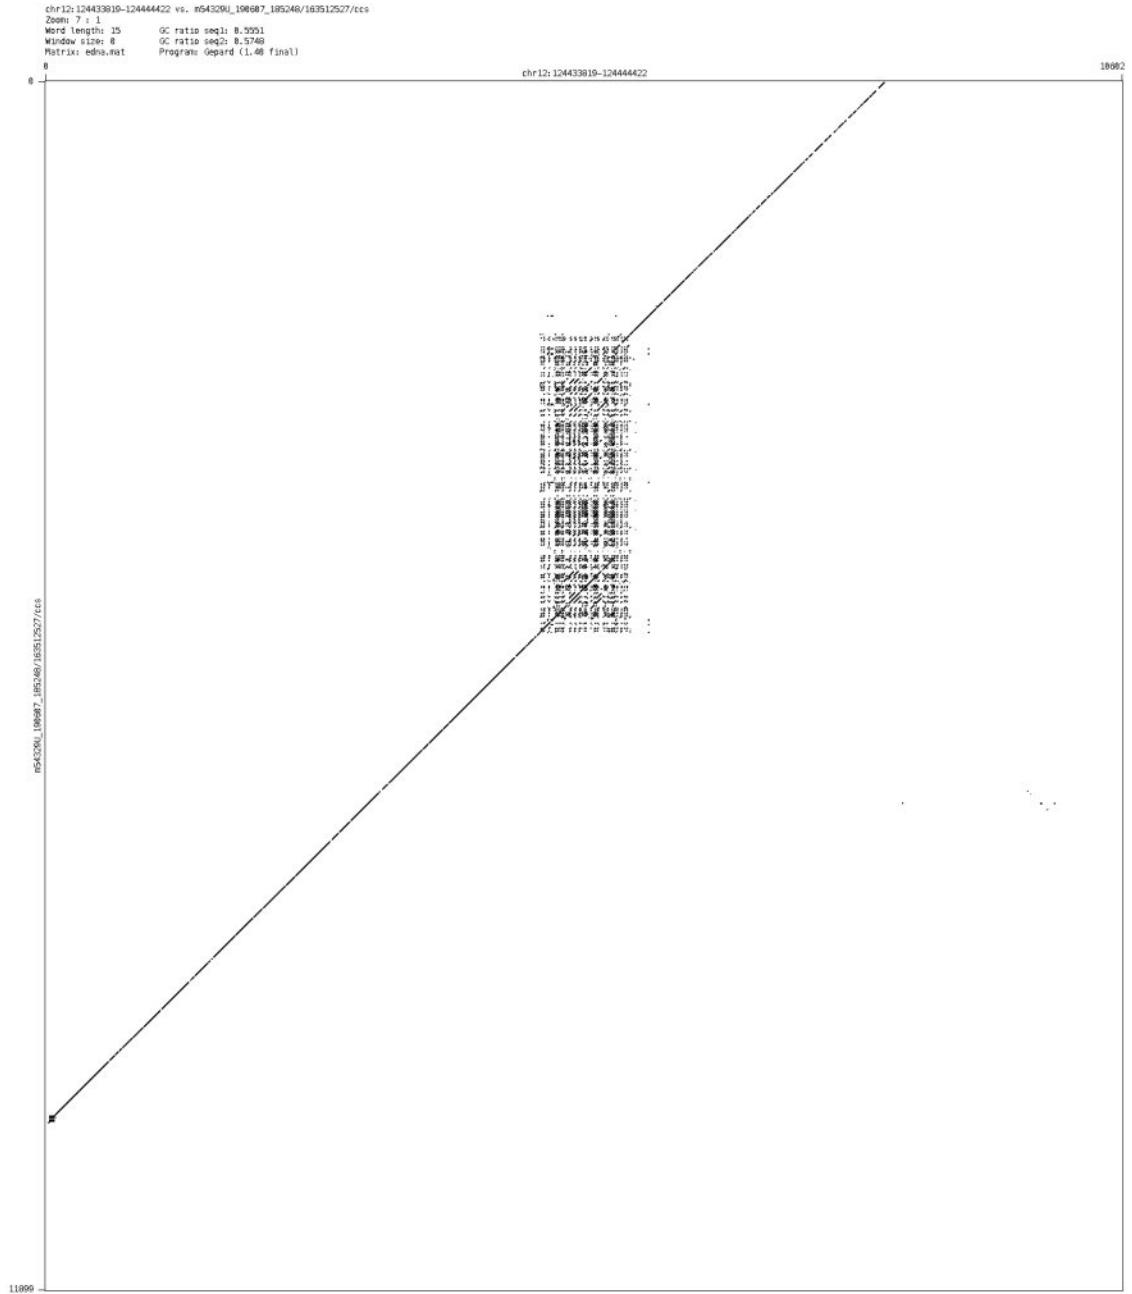

➤ chr12\_127697075\_127697231

chr12:127692075-127702231 vs. m54320\_190697\_185248/36586183/ccs  
Zoom: 7 : 1  
Word length: 15 GC ratio seq1: 0.3663  
Window size: 0 GC ratio seq2: 0.3628  
Matrix: edna.mat Program: Oepard (1.48 final)

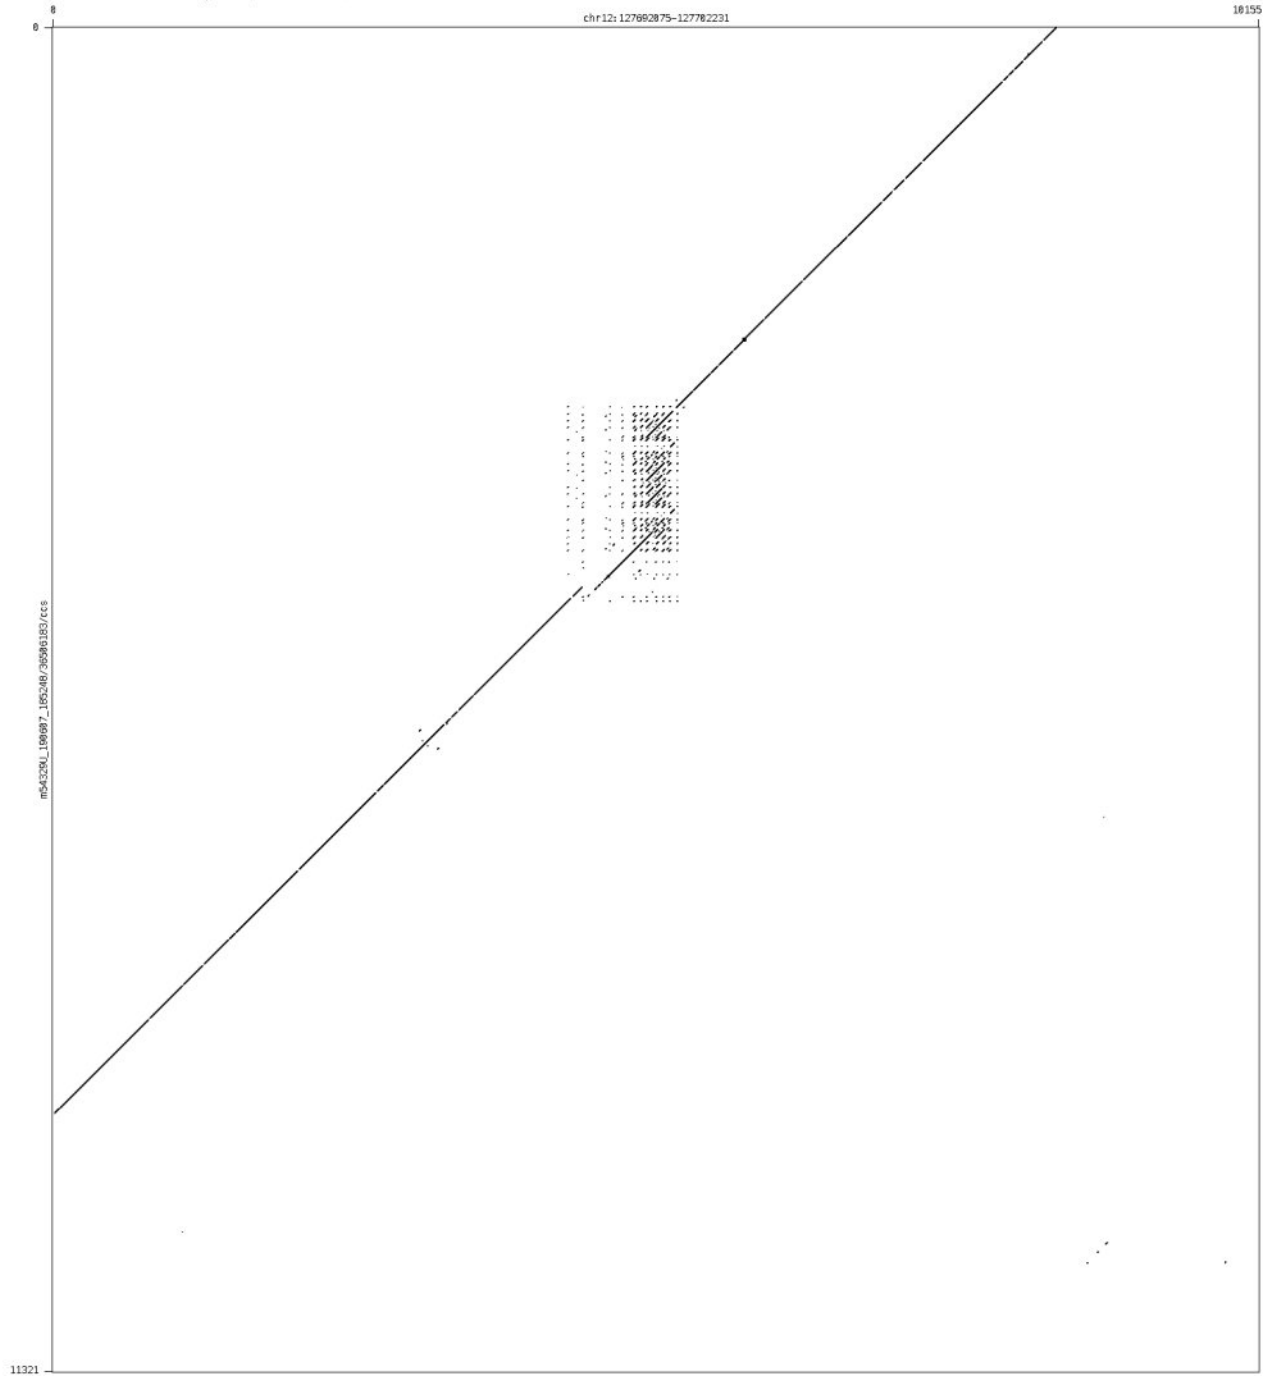

➤ chr12\_127906184\_127907400

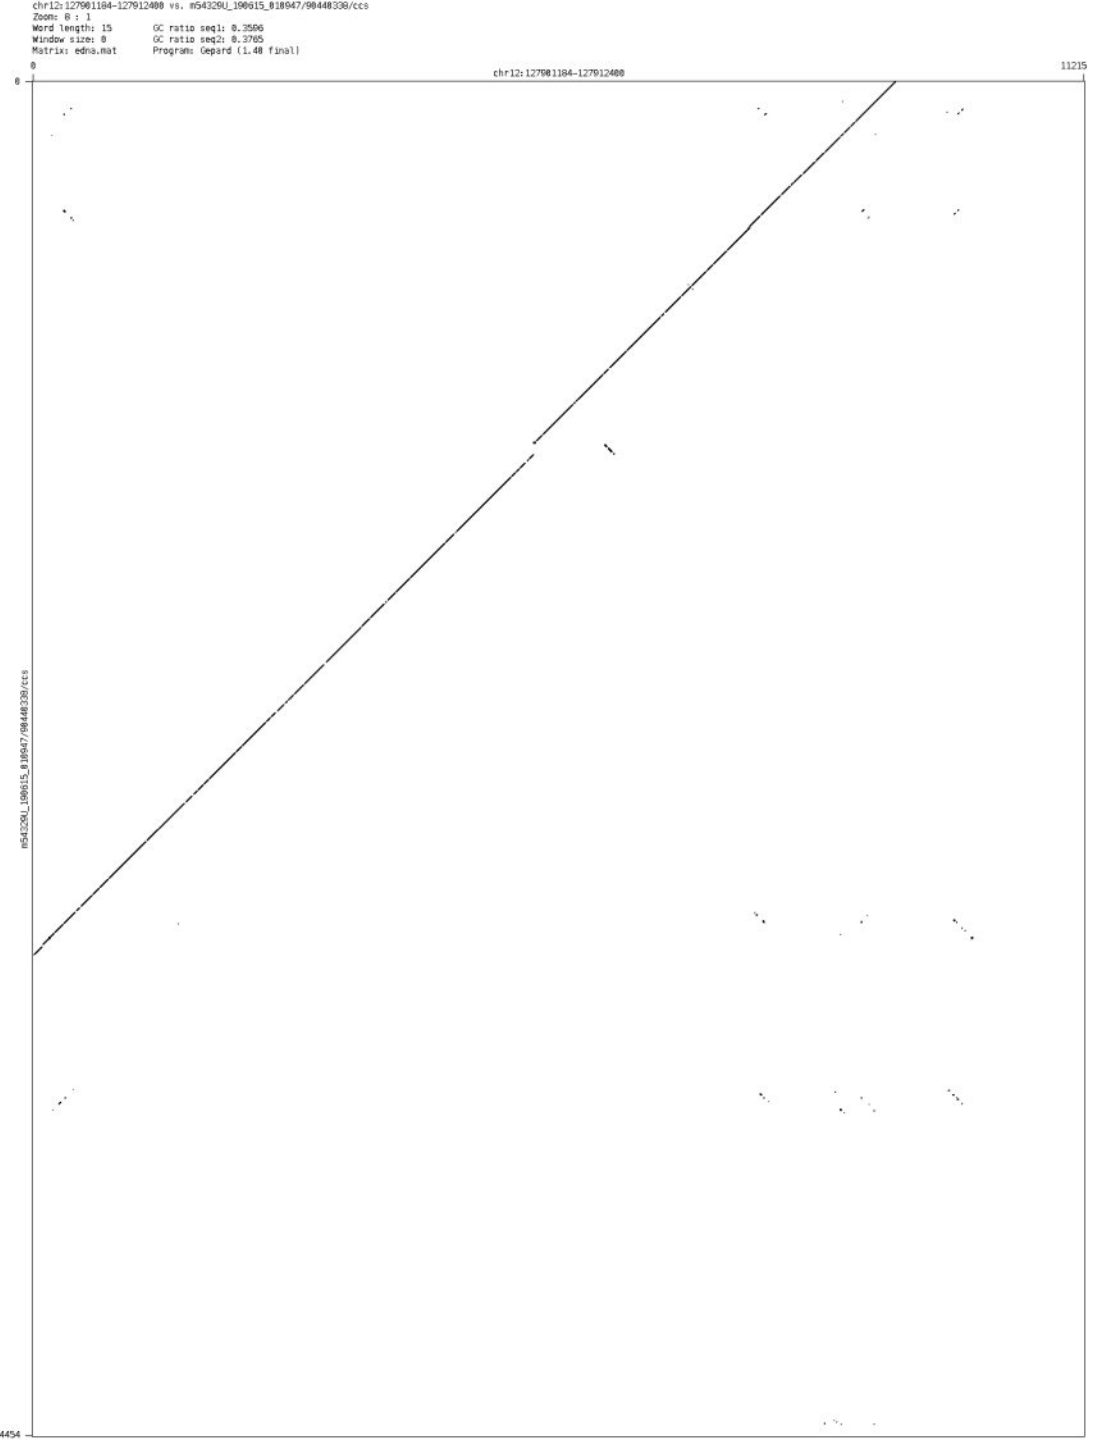

➤ chr12\_128708600\_128708803

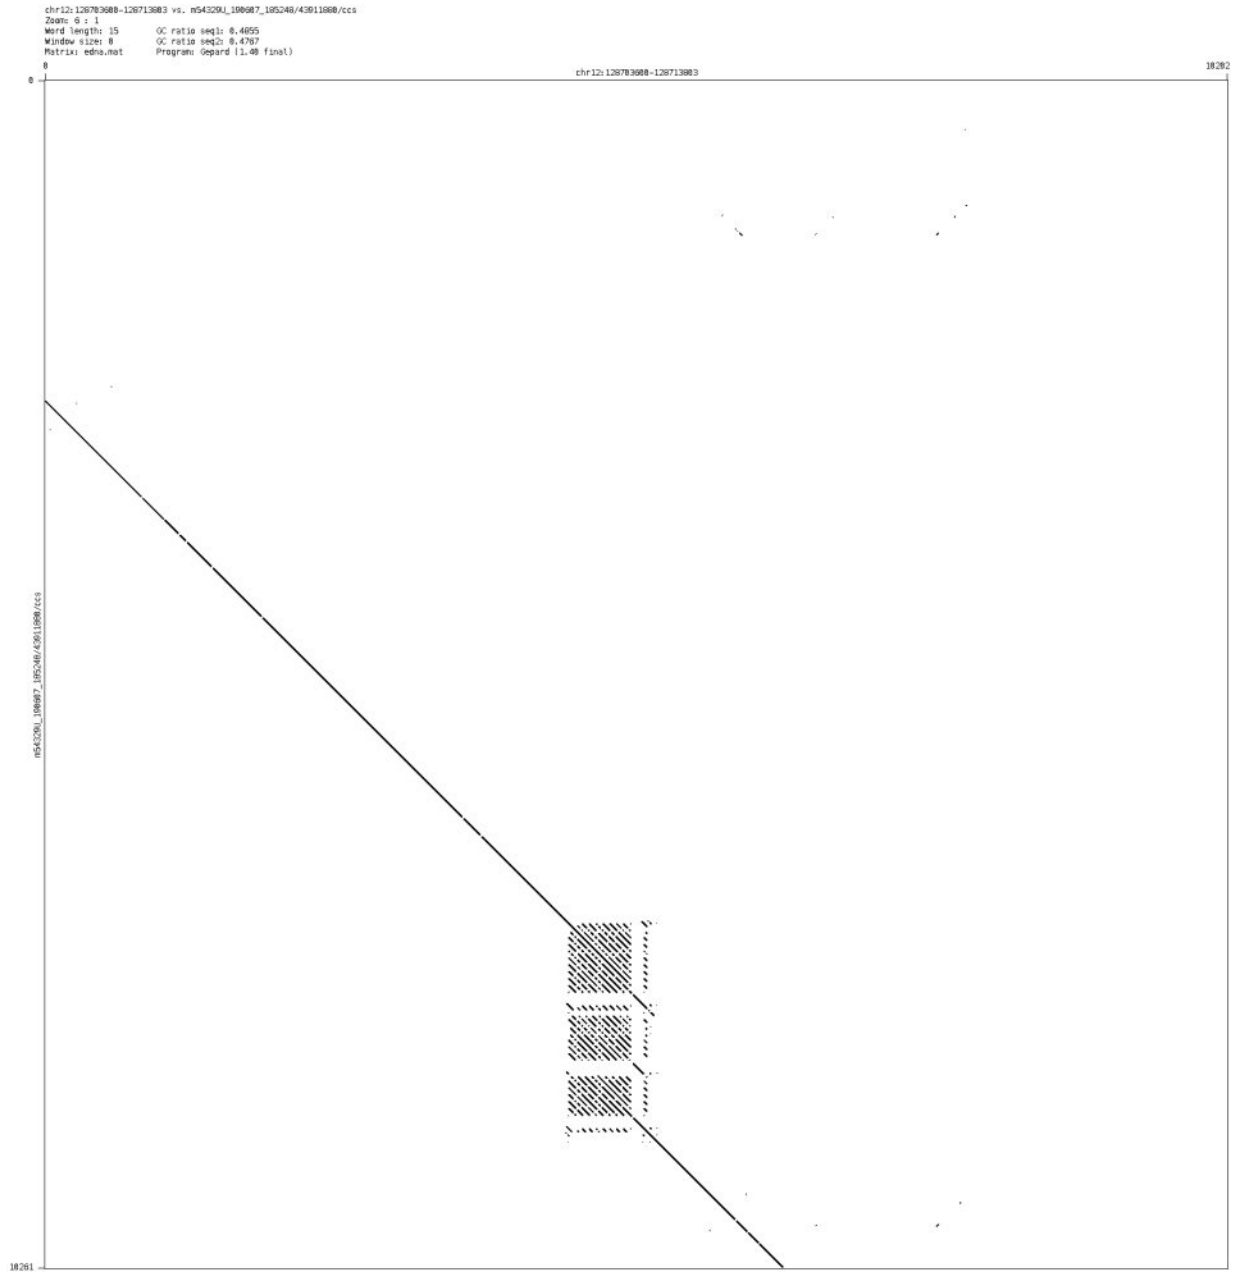

➤ chr12\_131046207\_131046337

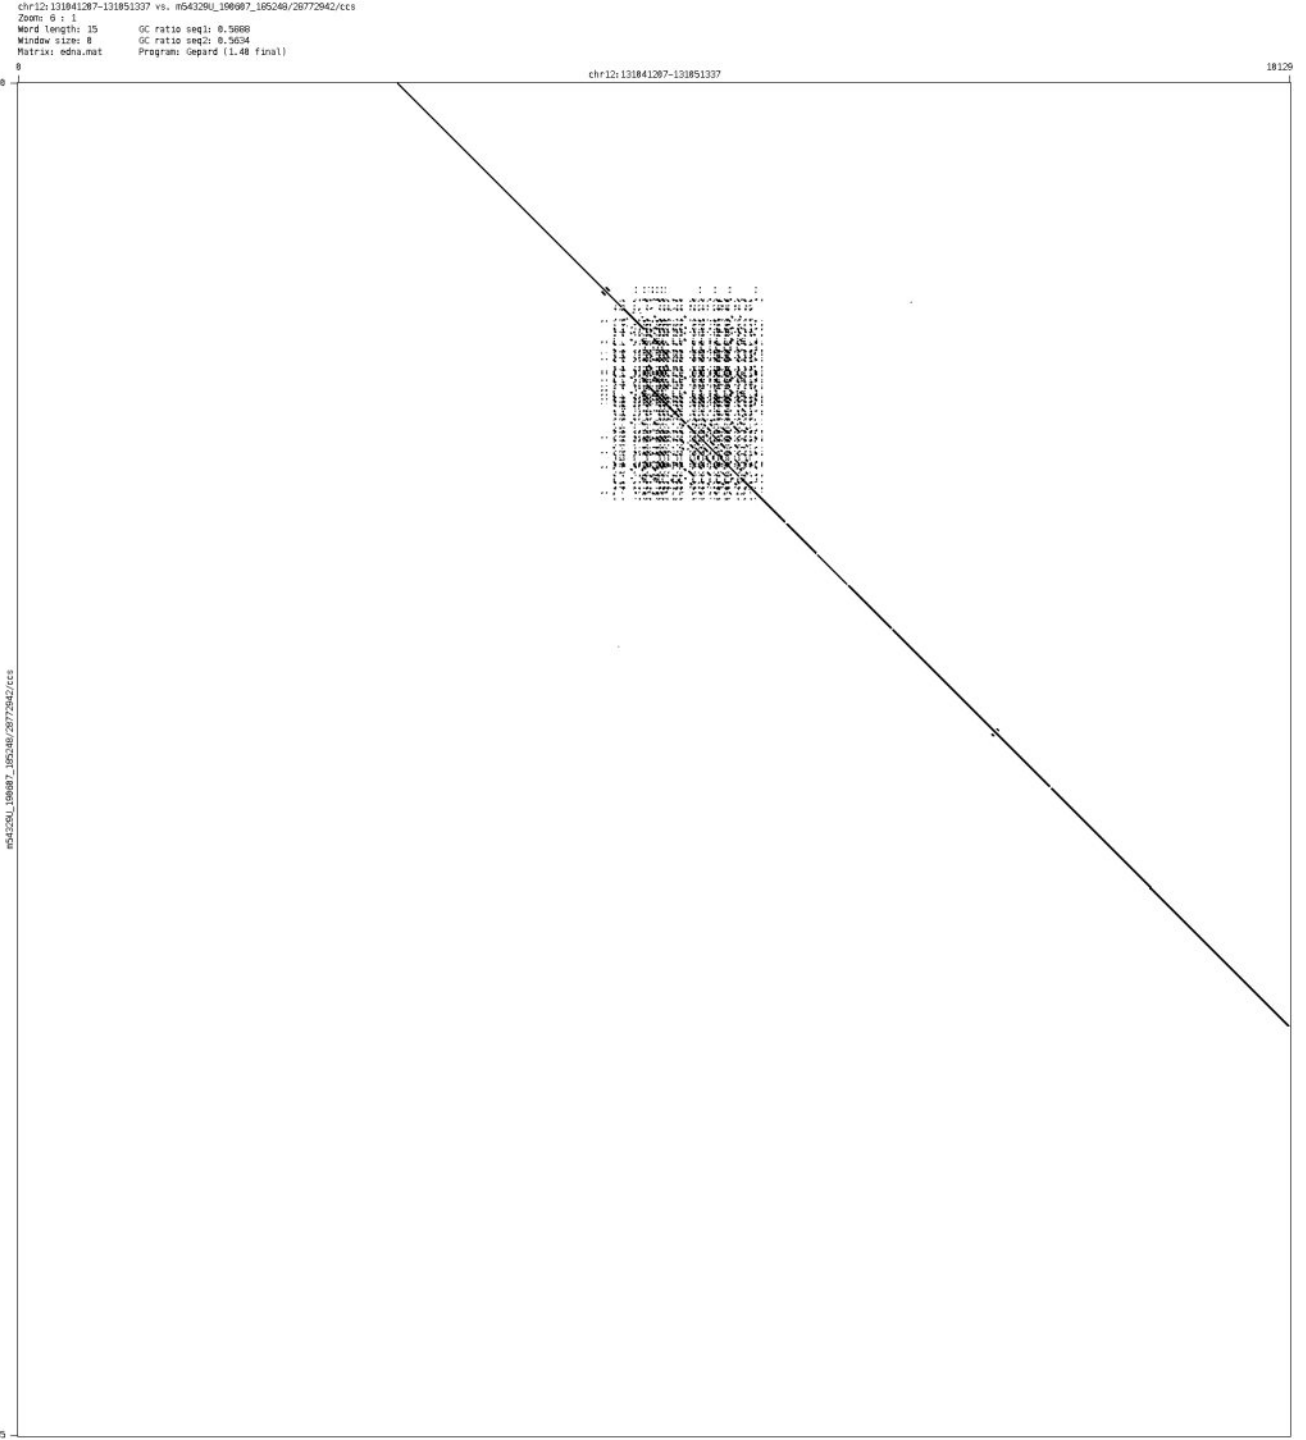



➤ chr12\_131918765\_131918869

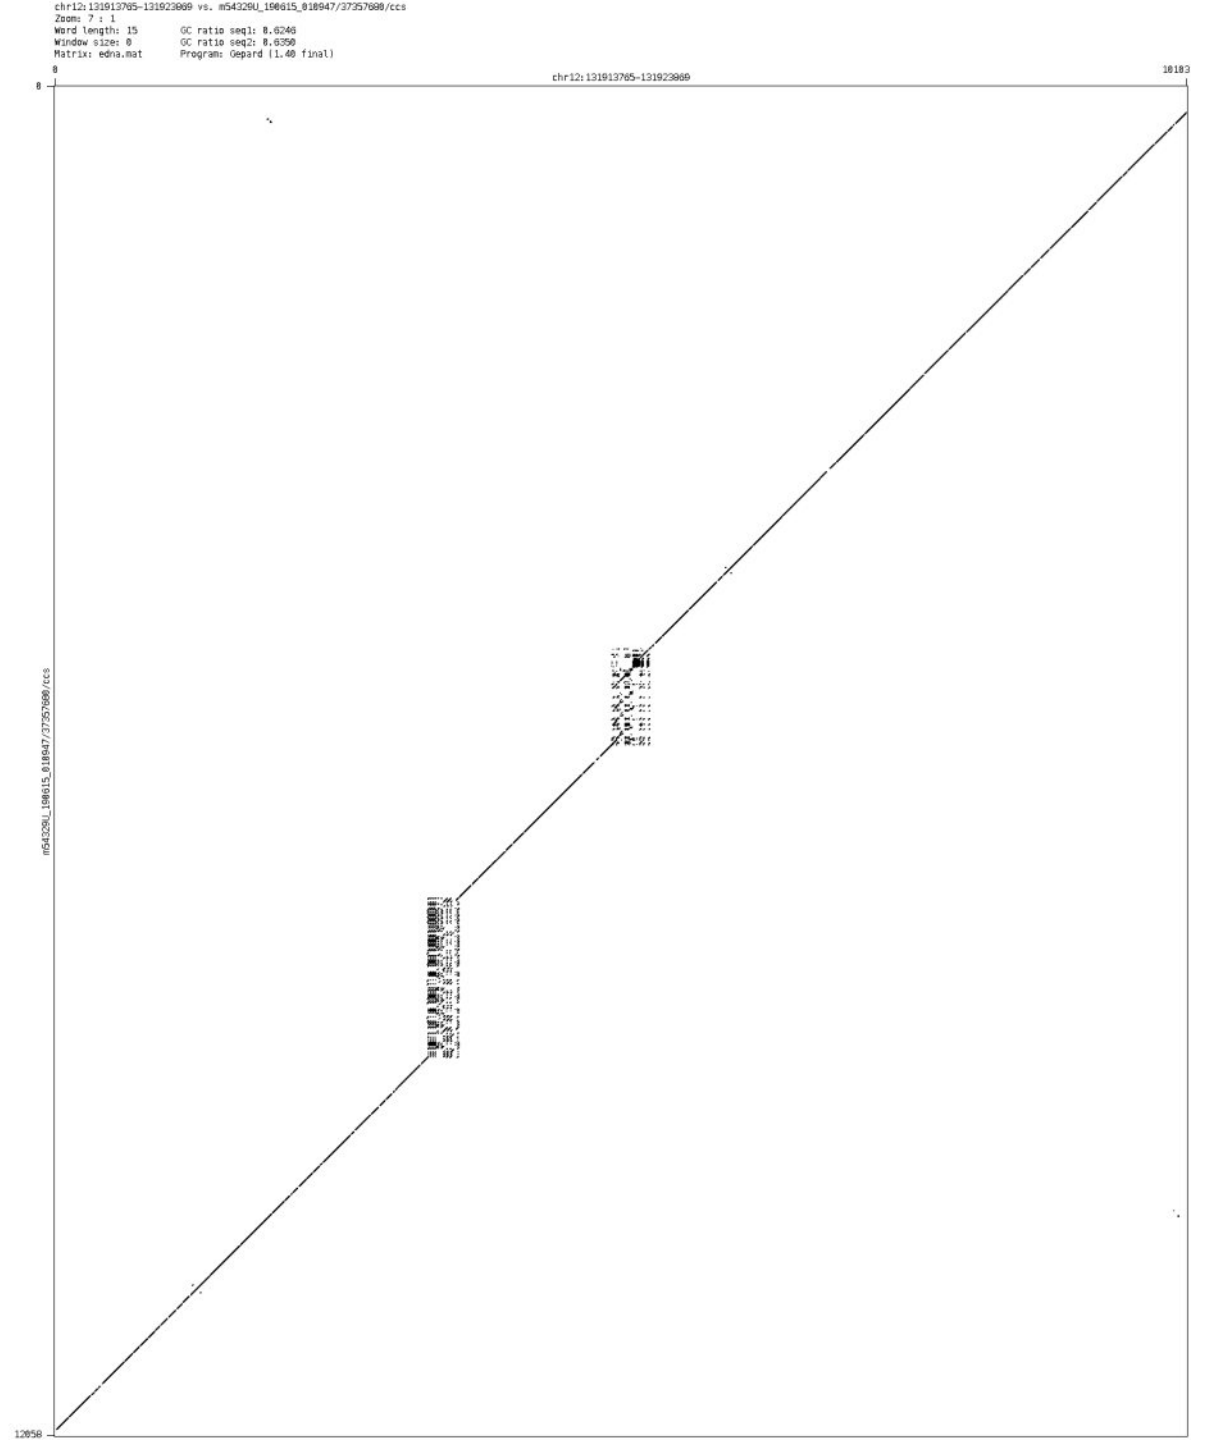

➤ chr12\_132387869\_132387963

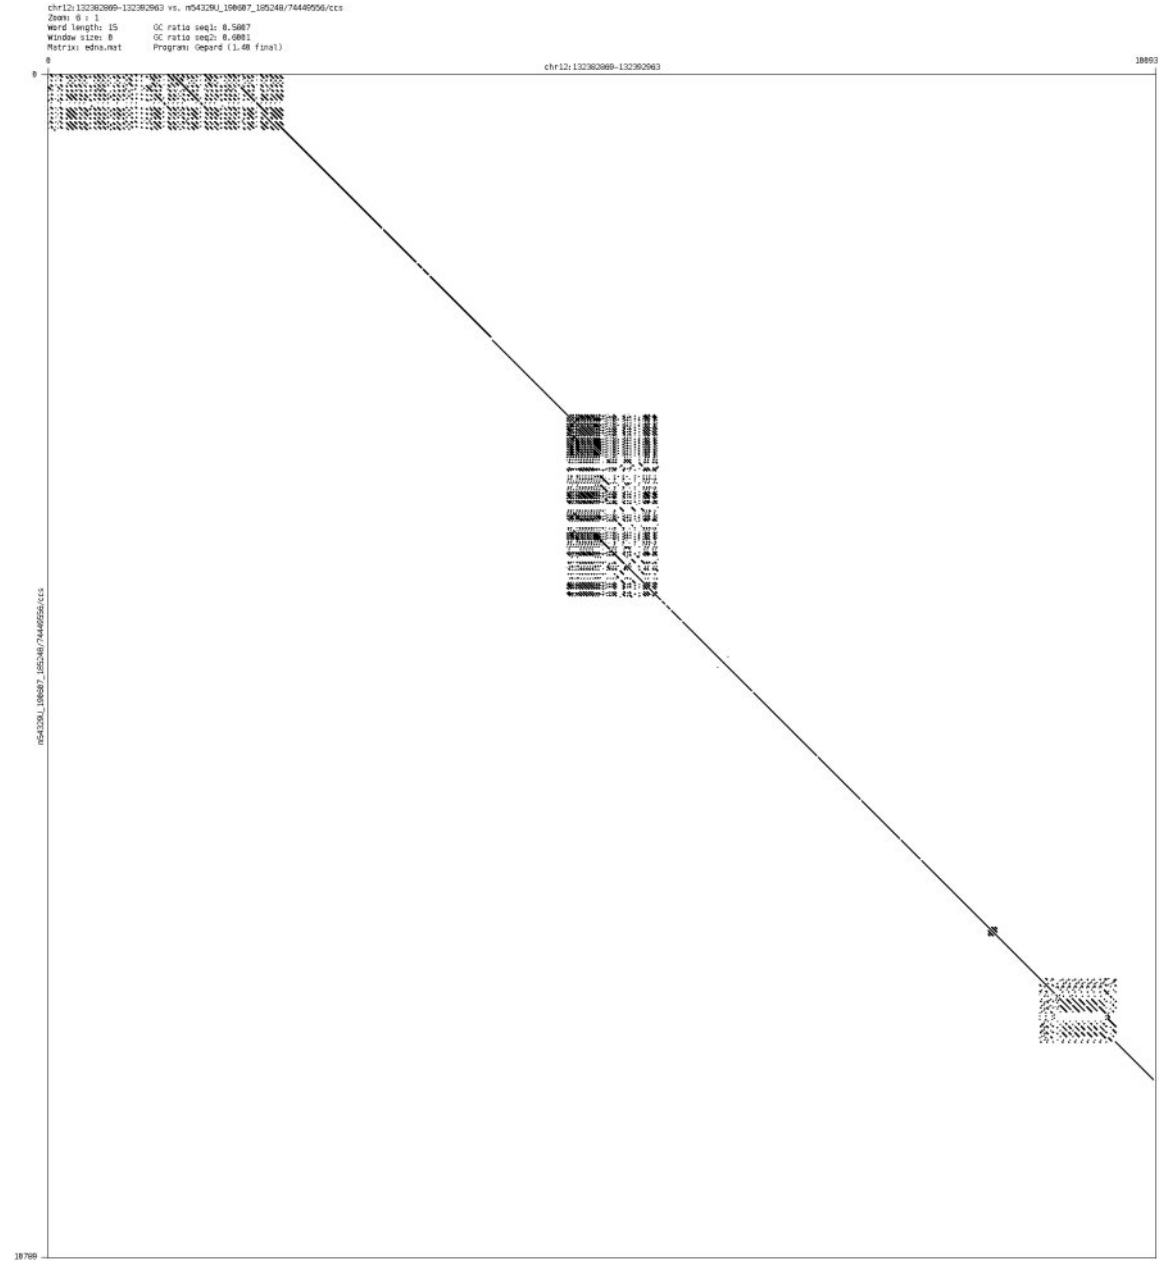

➤ chr12\_132463913\_132464505

chr12:132458913-132469505 vs. m54329U\_190617\_291995/48435982/ccs  
Zoom: 7 : 1  
Word length: 15 GC ratio seq1: 0.5301  
Window size: 0 GC ratio seq2: 0.5555  
Matrix: edna.mat Program: Gepard (1.48 final)

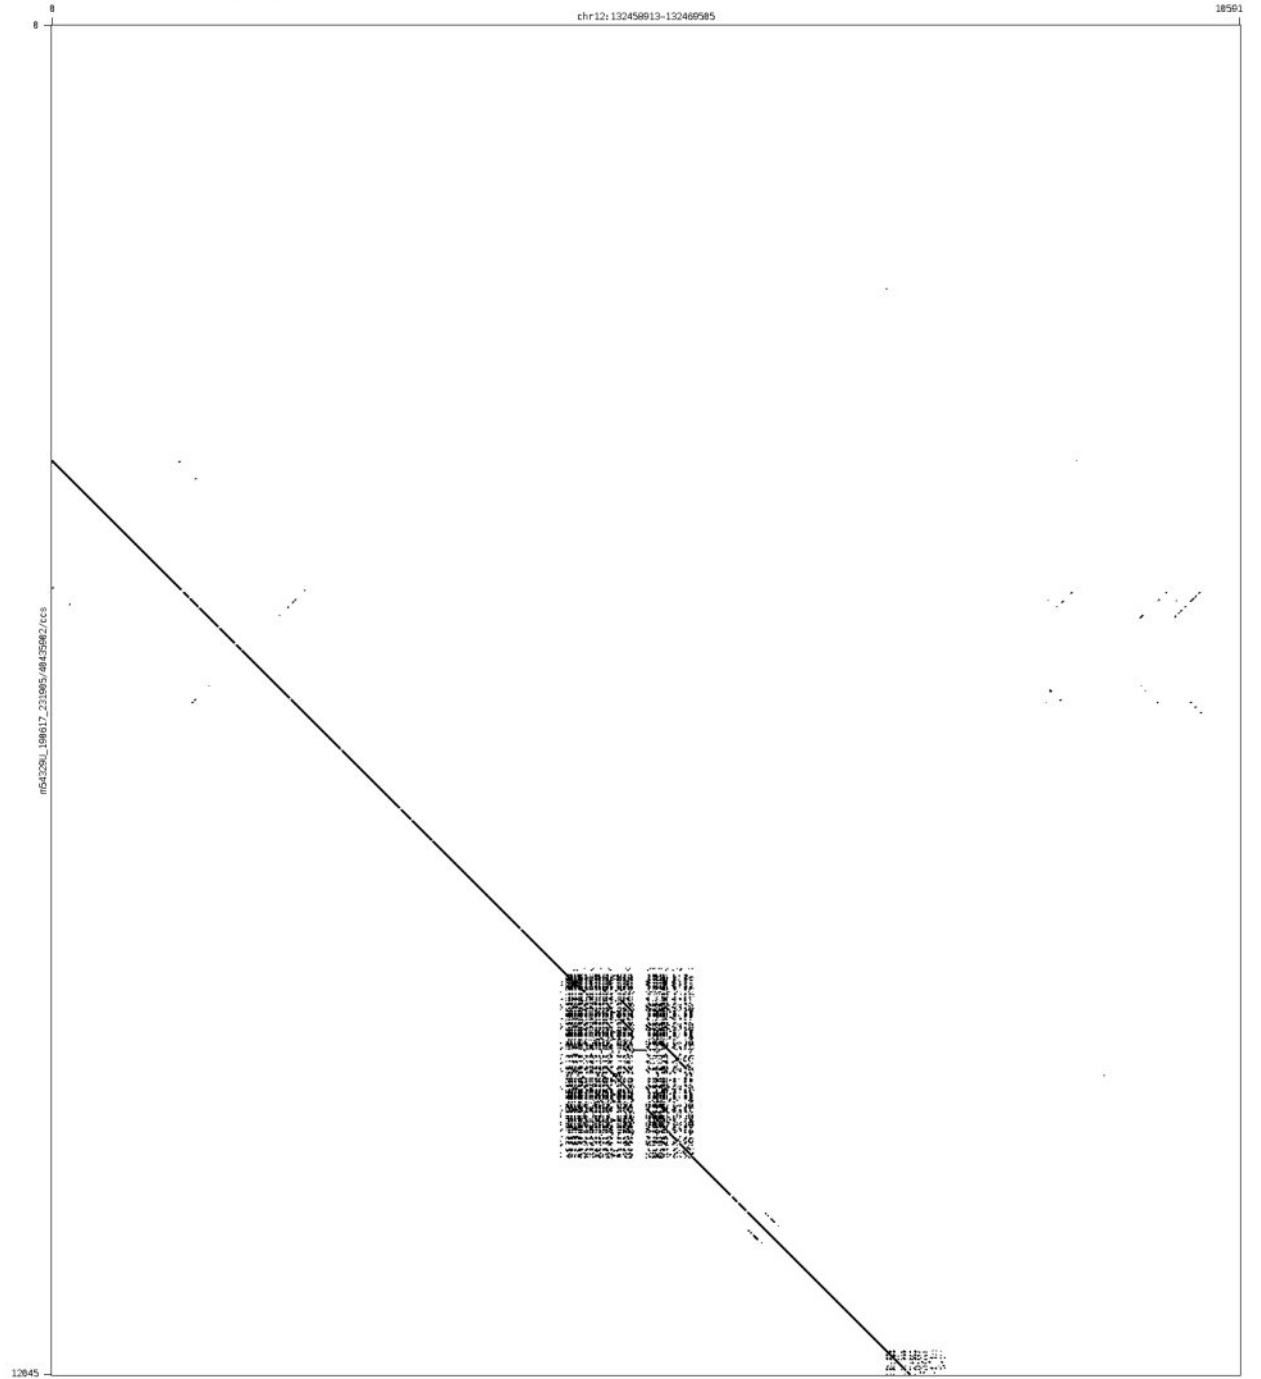

➤ chr13\_35956622\_35958426

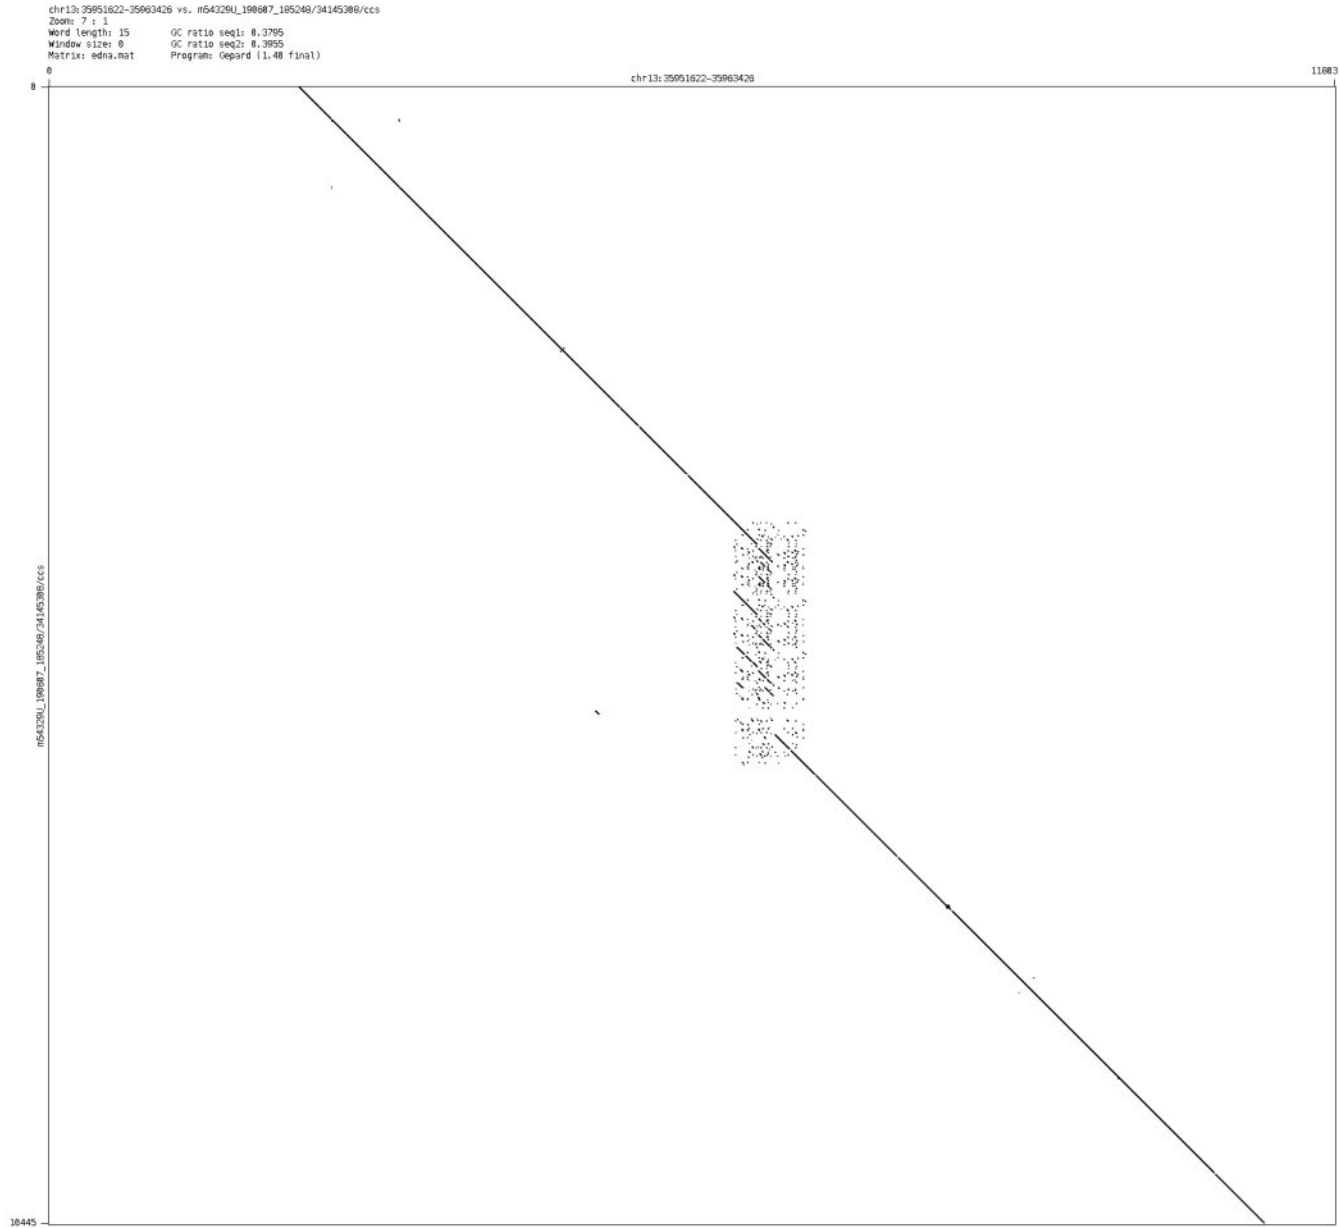

➤ chr13\_38956678\_38956810

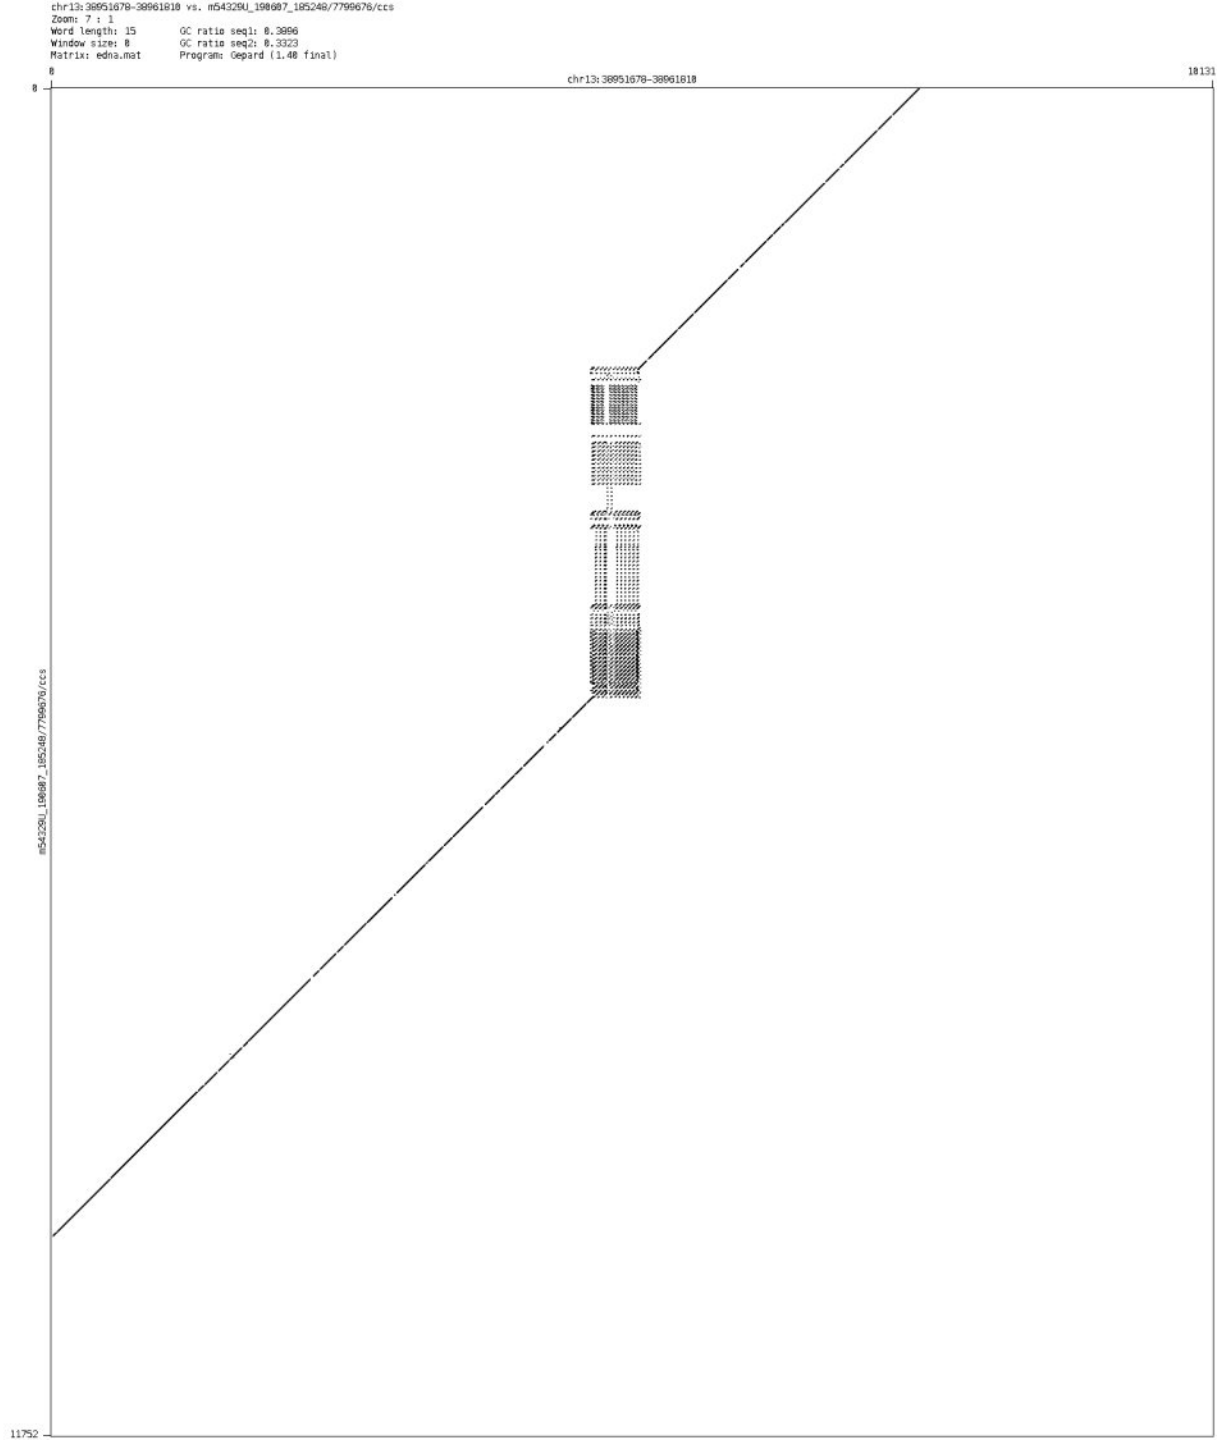

➤ chr13\_60977009\_60978048

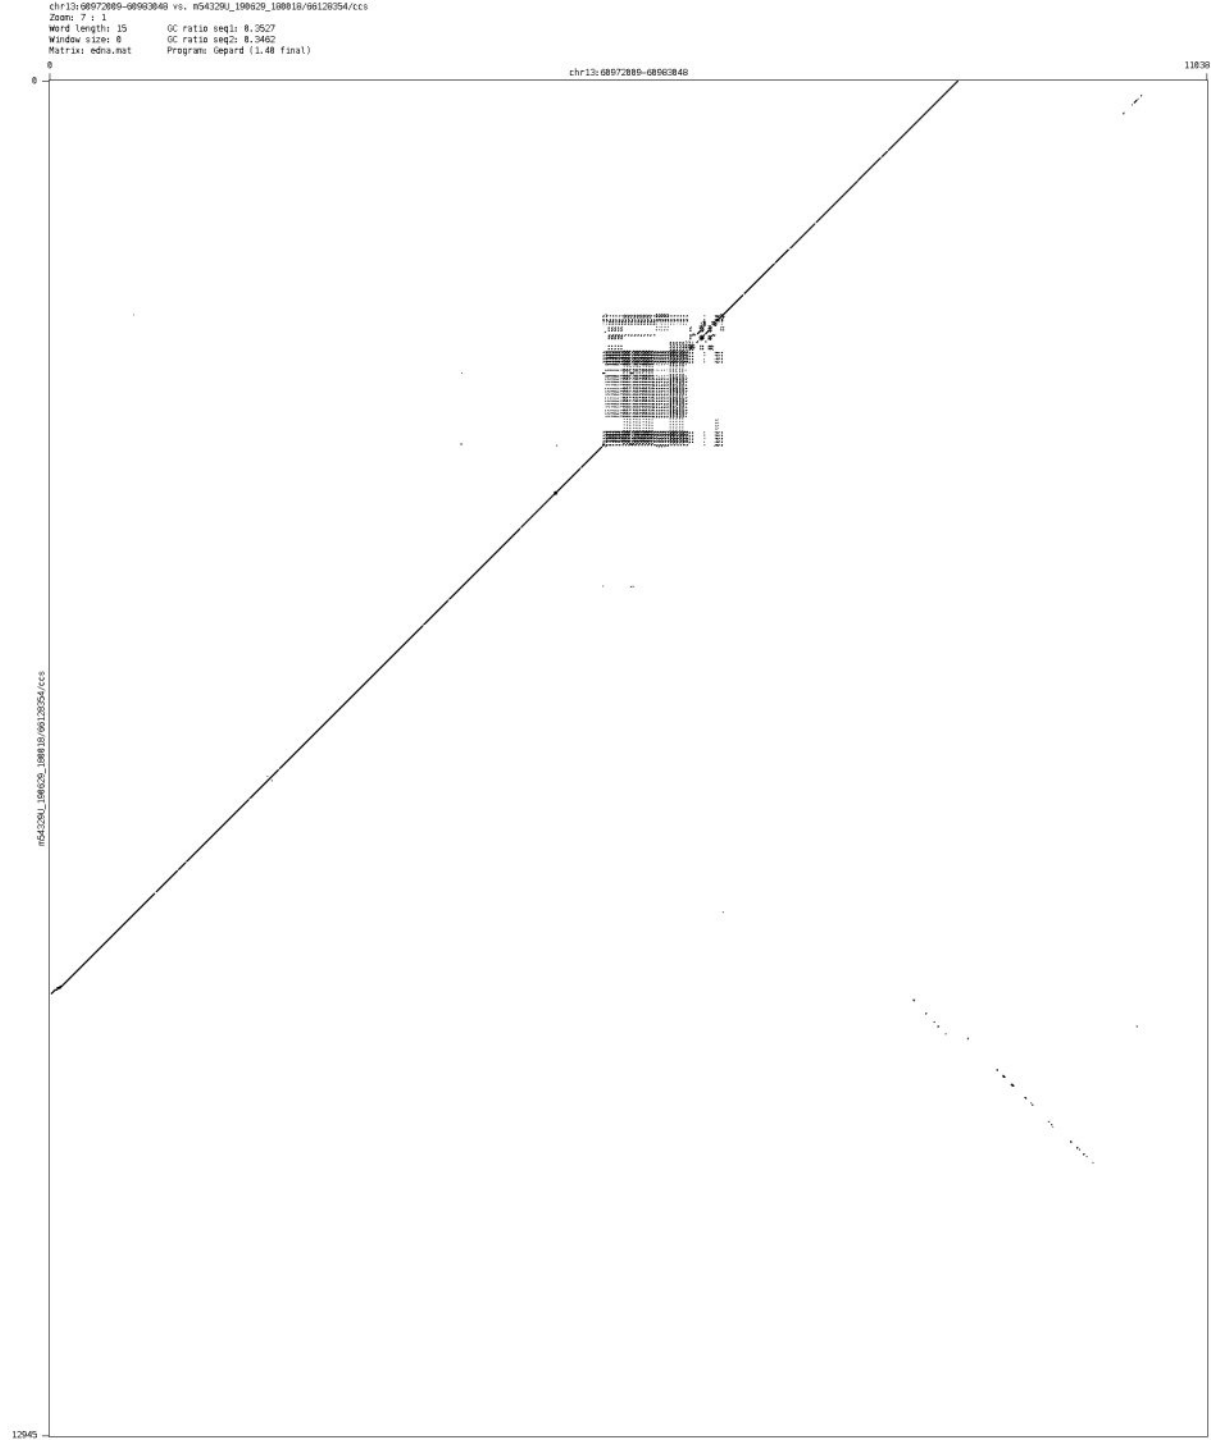

➤ chr13\_71118063\_71118136

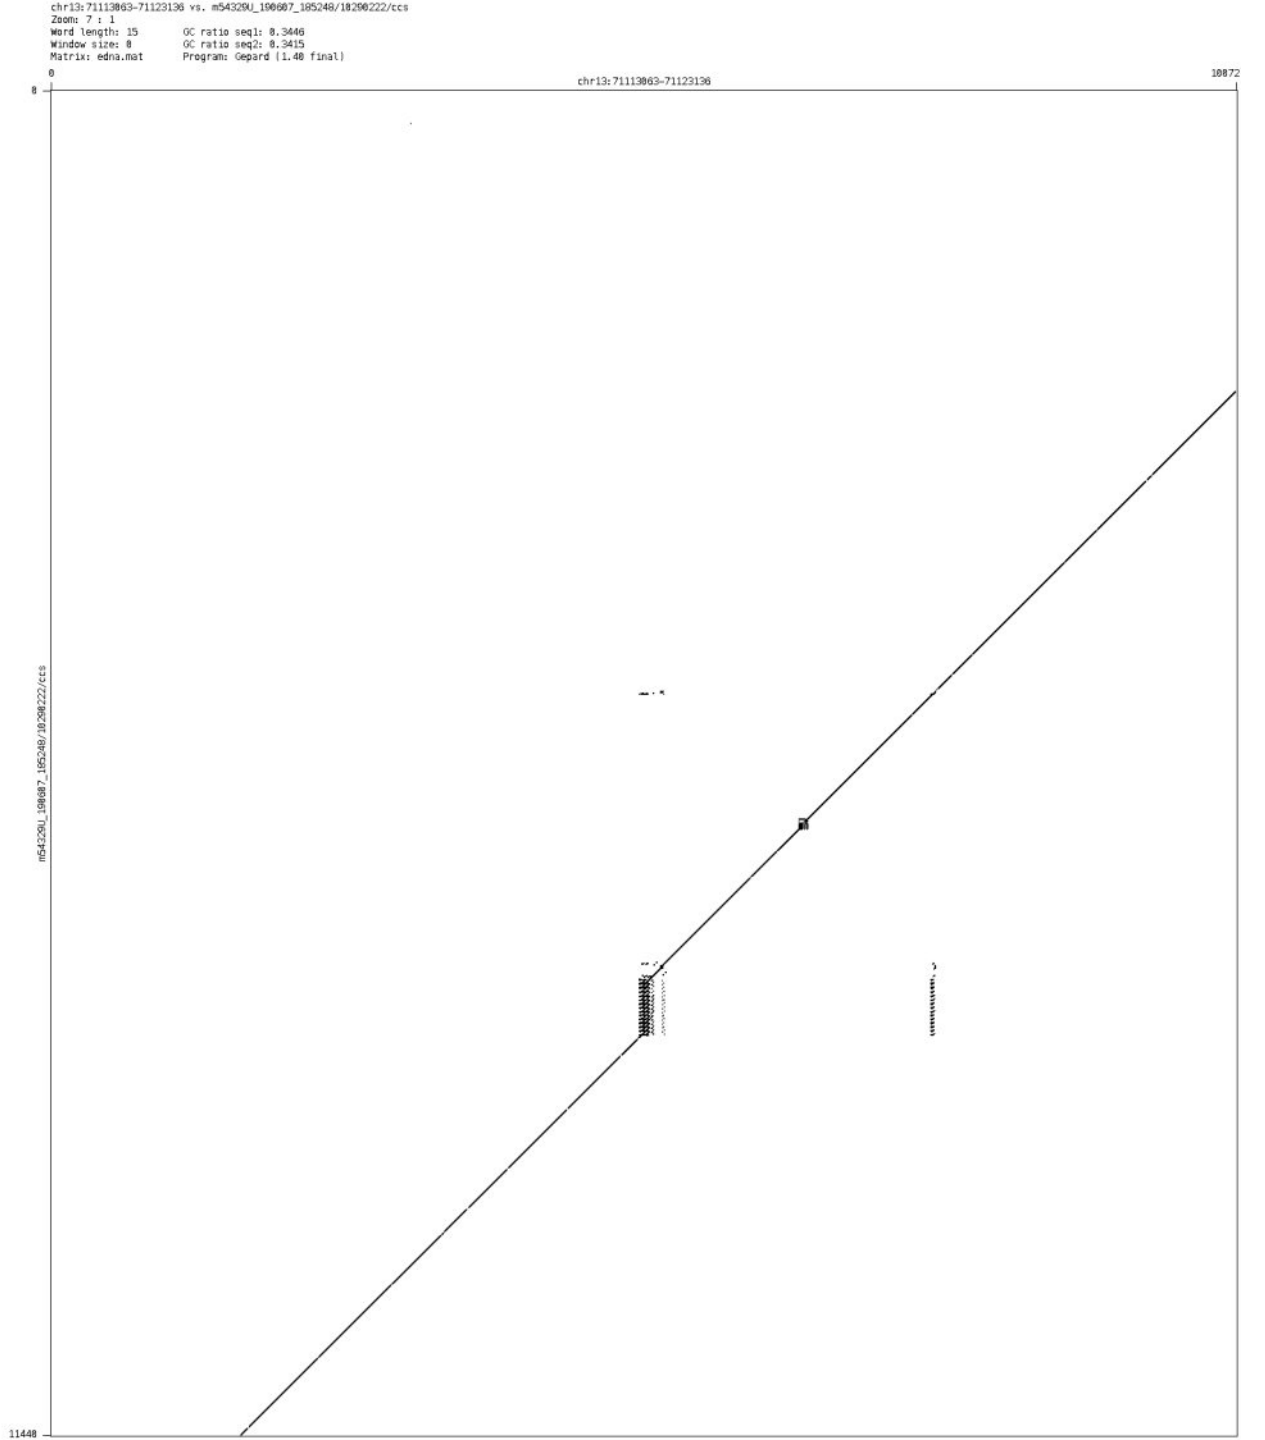

➤ chr13\_74340759\_74342810

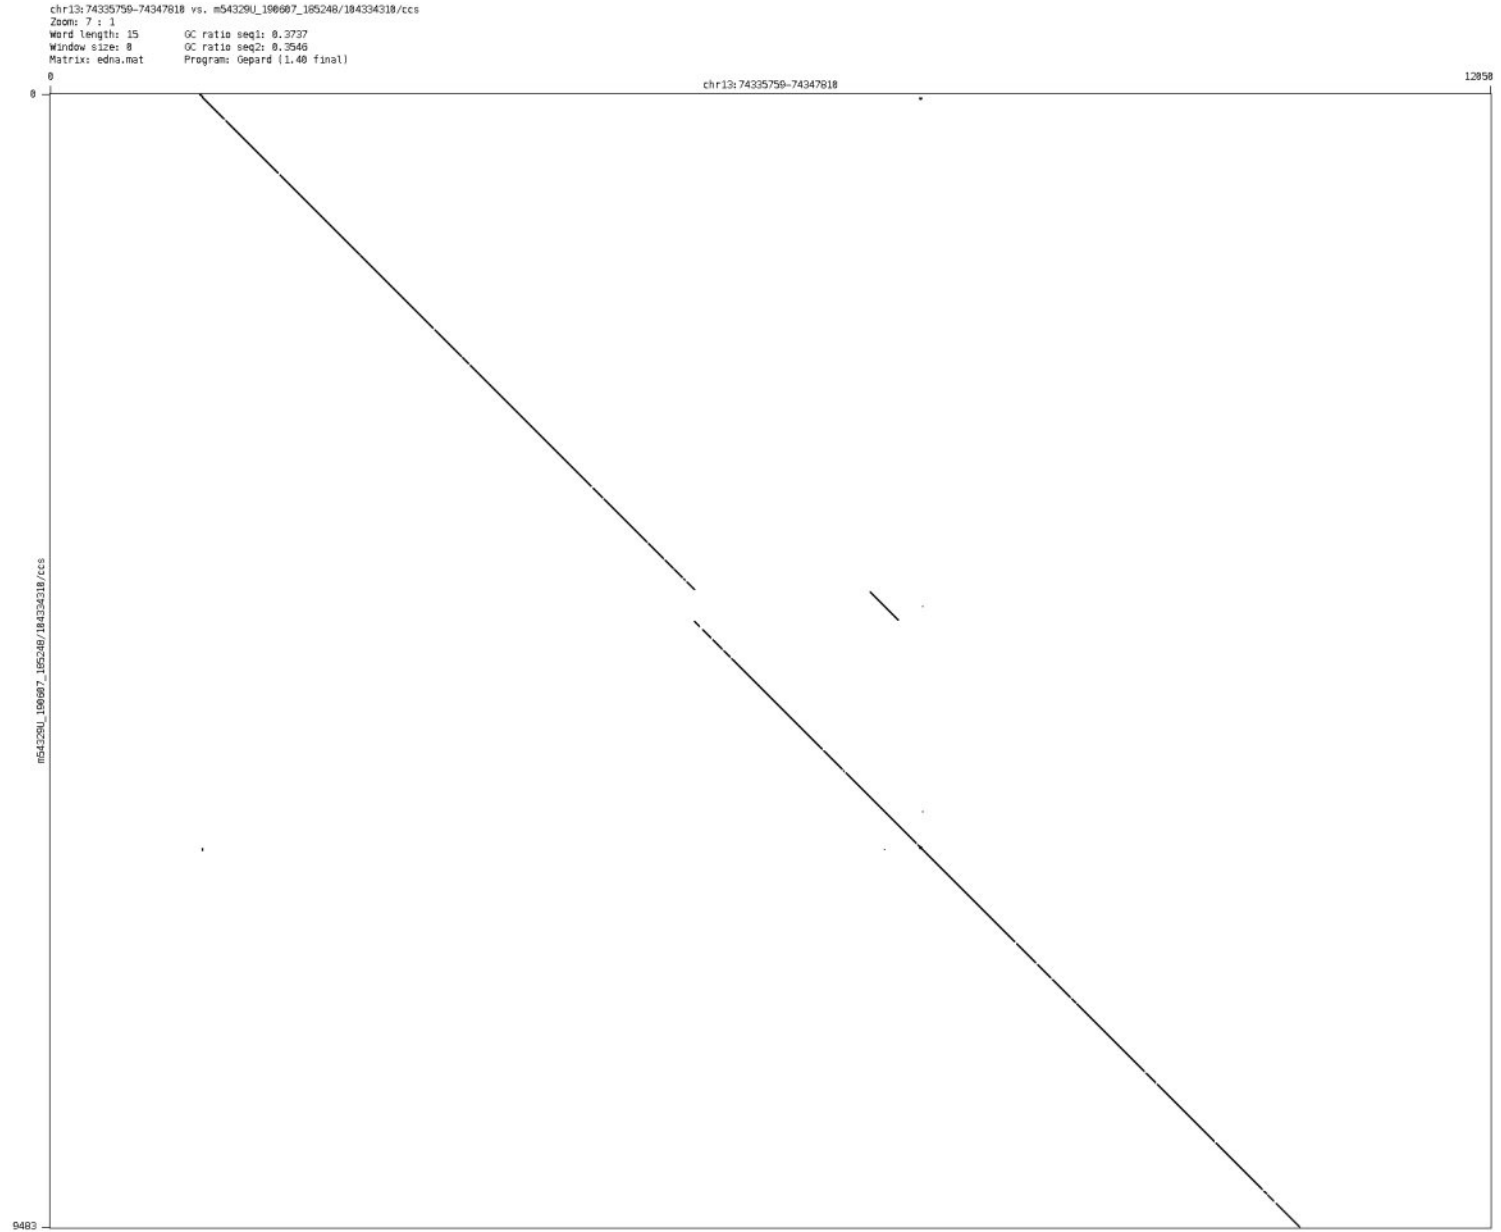



➤ chr13\_88458439\_88460627

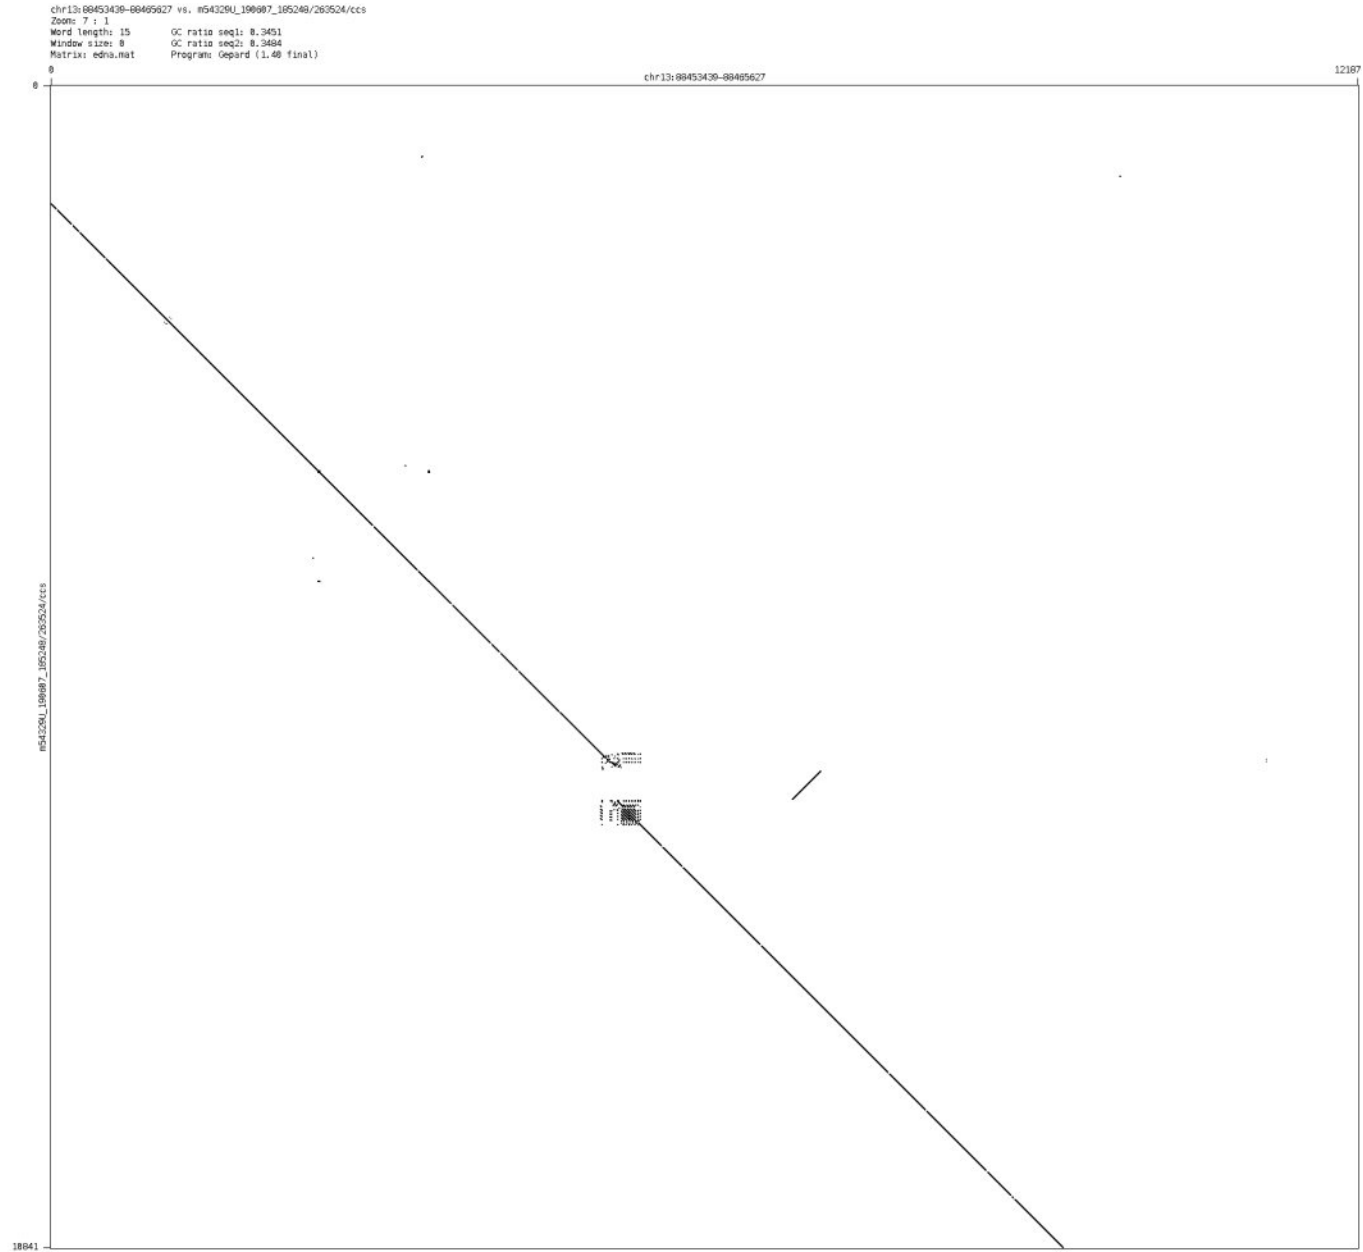

➤ chr13\_111568050\_111568256

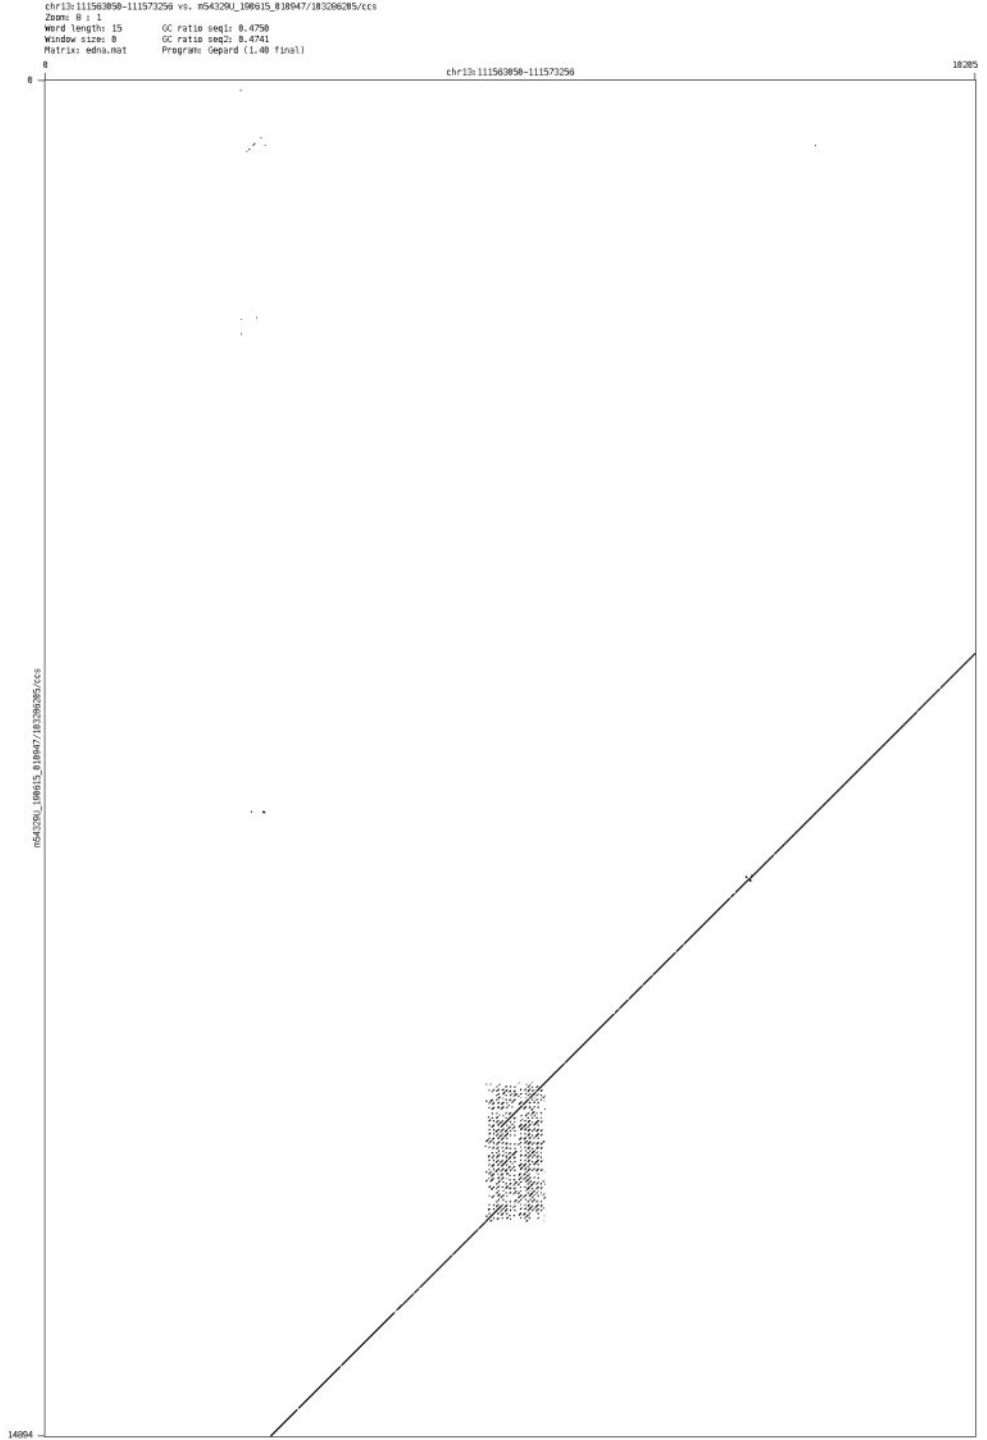

➤ chr13\_113176451\_113176522

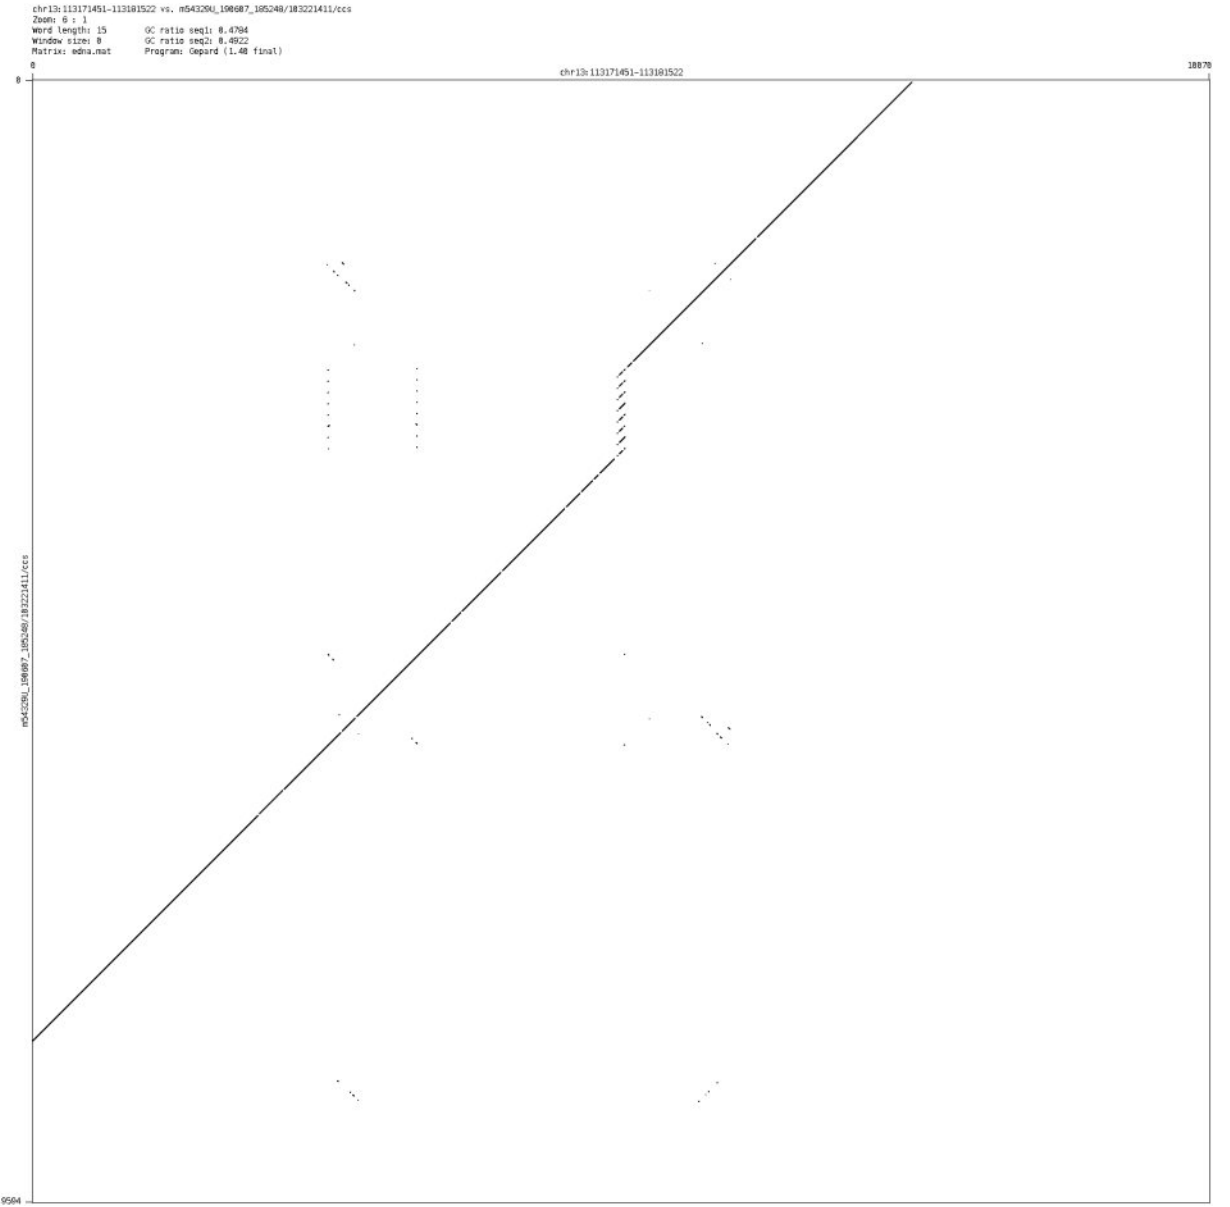

➤ chr13\_113345937\_113347871

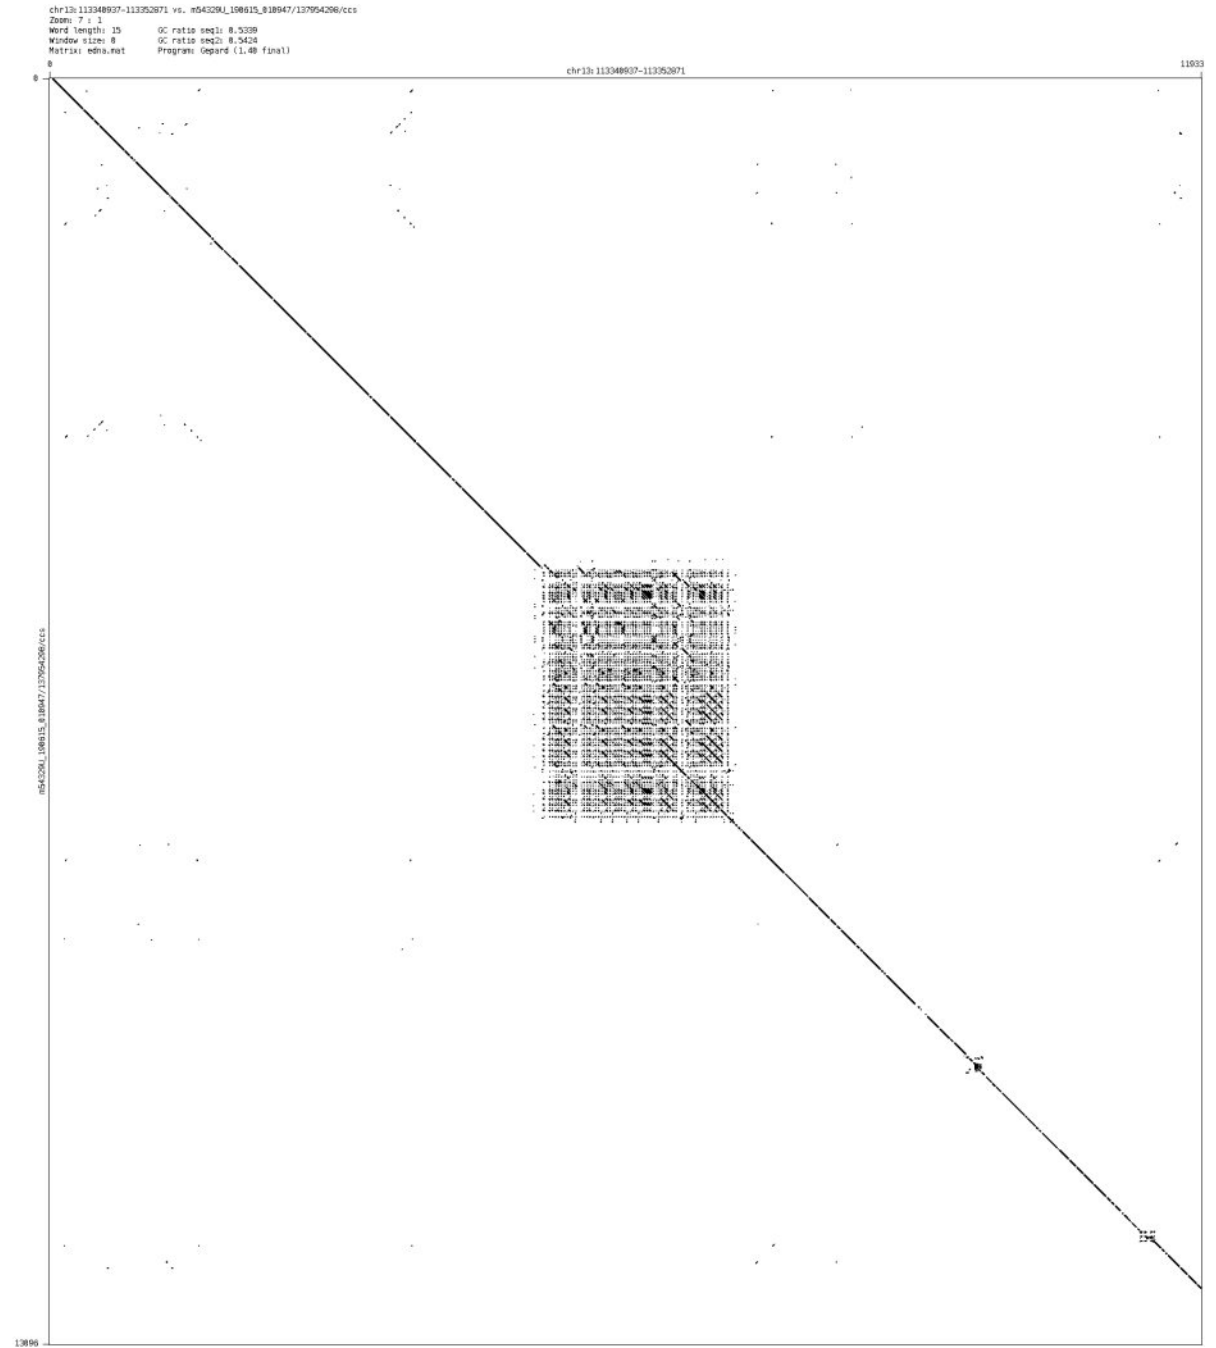

➤ chr13\_113419003\_113419055

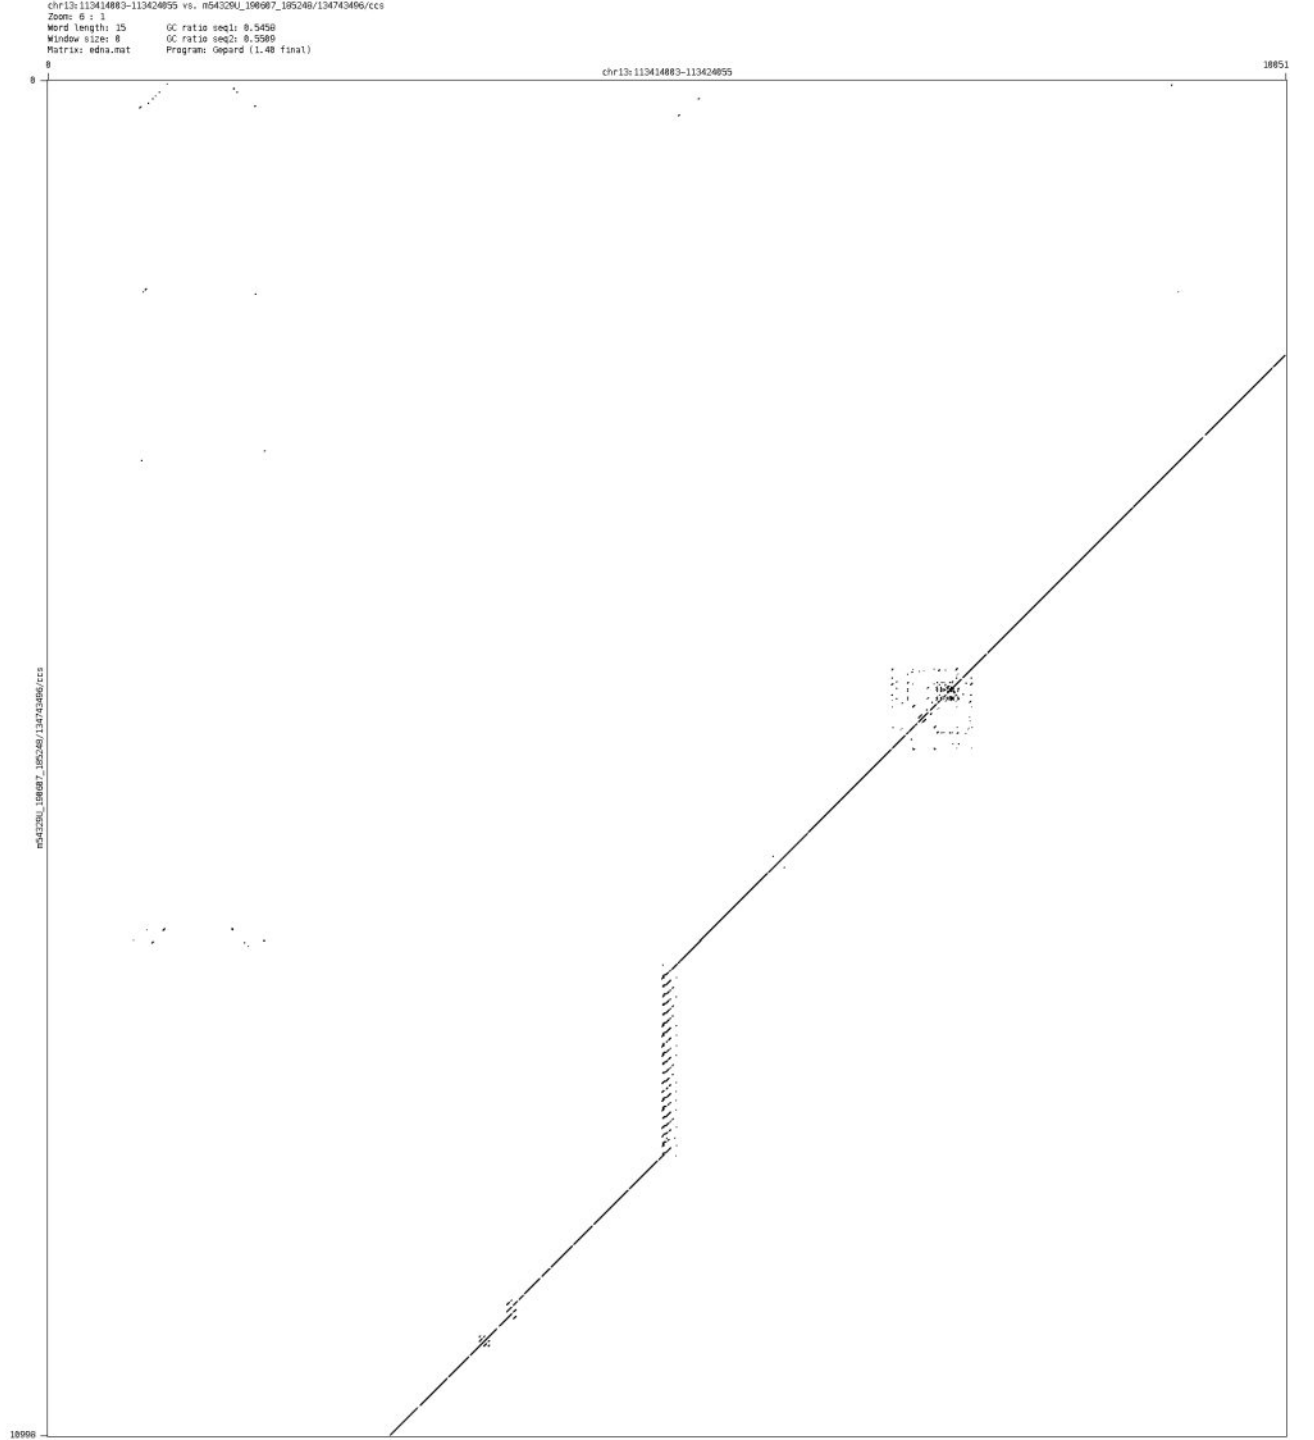

➤ chr13\_113435956\_113437202

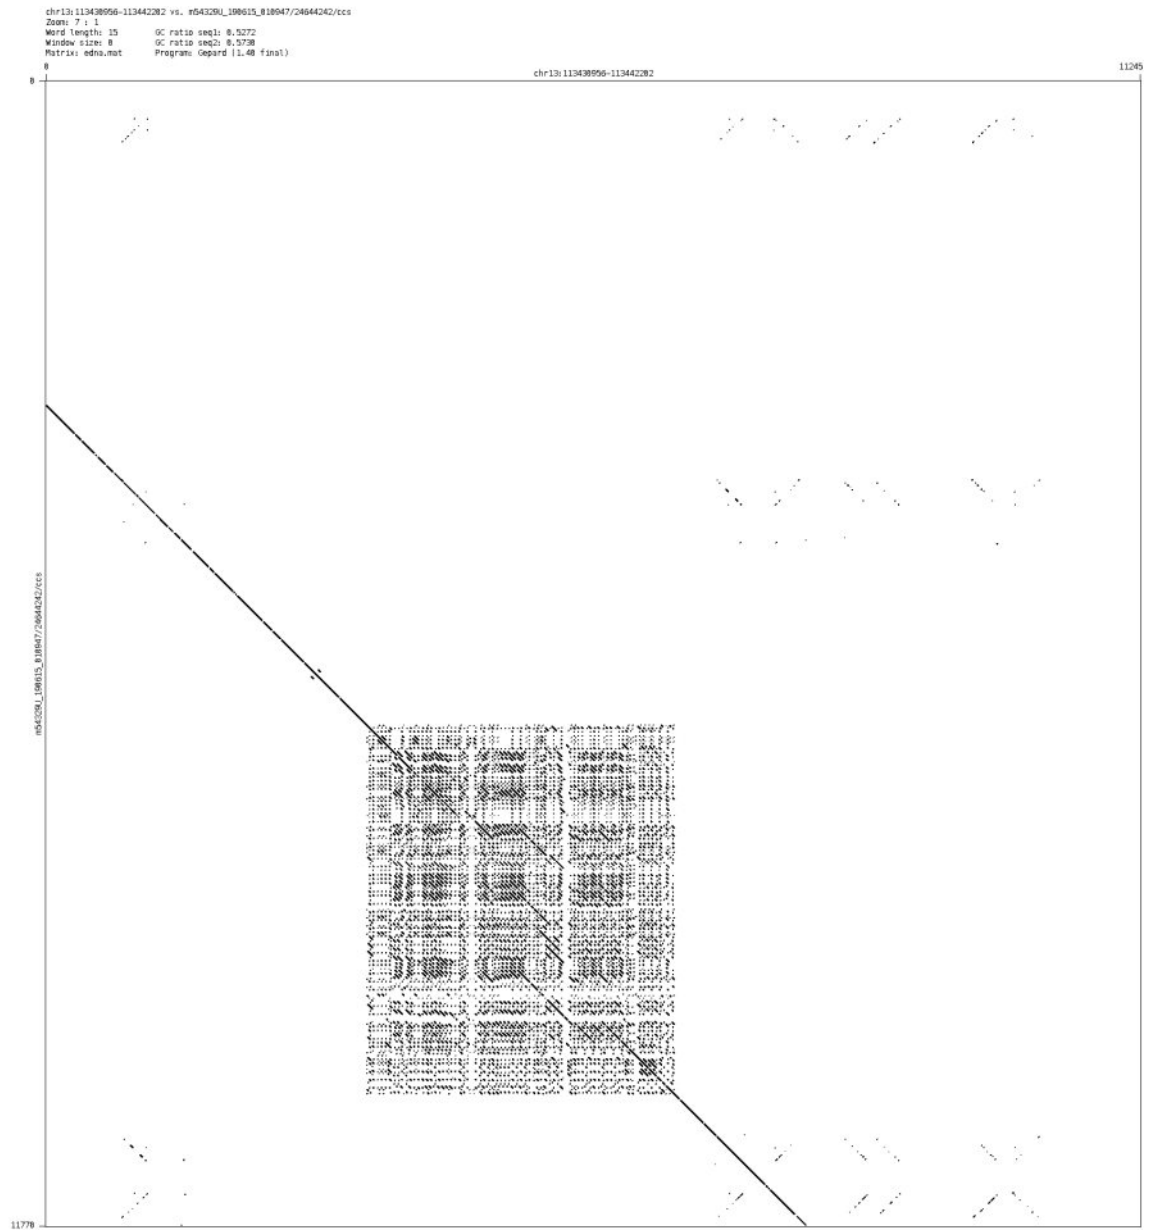

➤ chr13\_114198570\_114199832

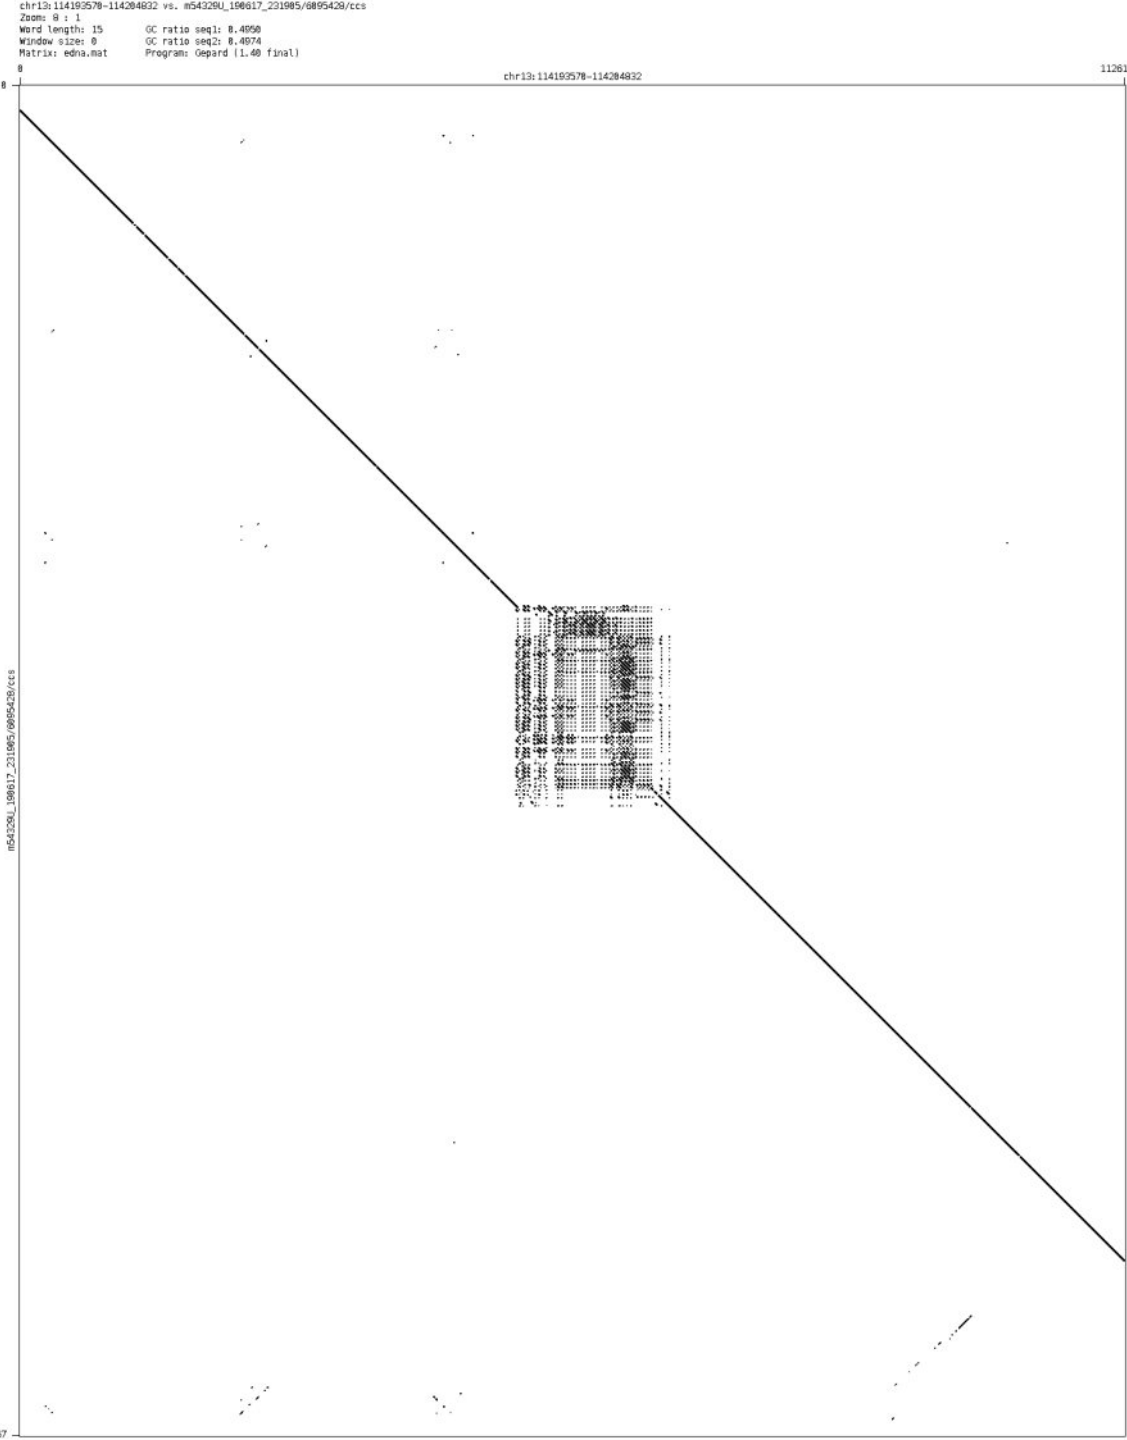

➤ chr14\_25141909\_25144901

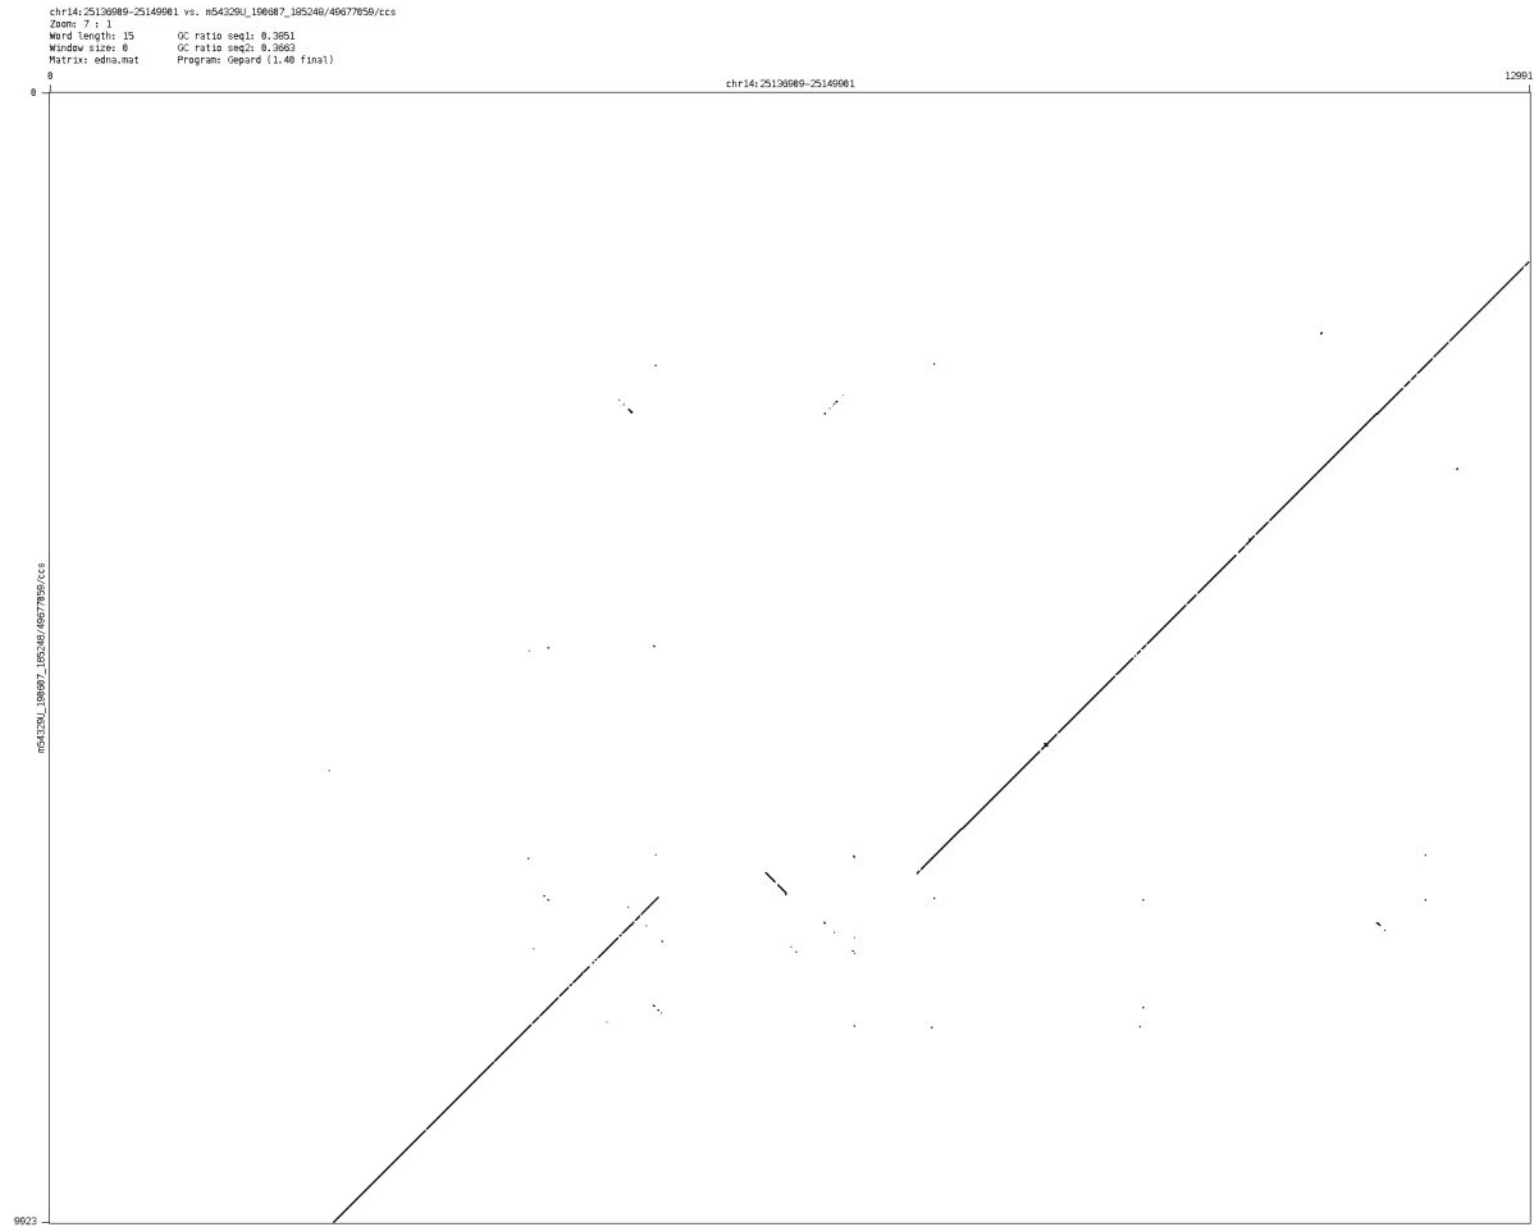



➤ chr14\_35948113\_35949836

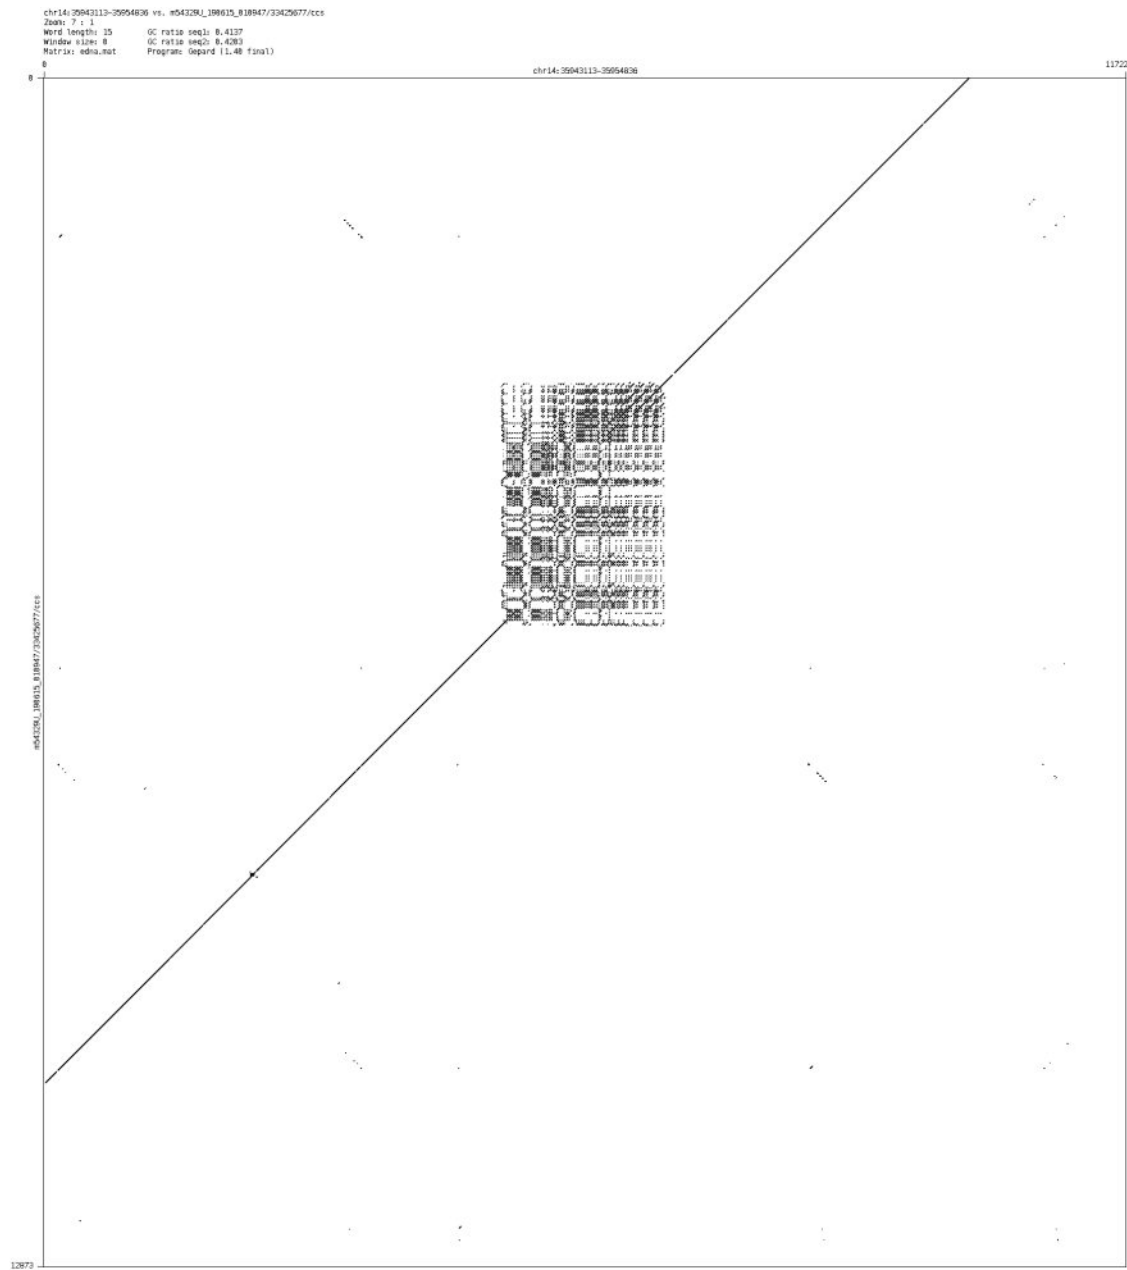

➤ chr14\_39644680\_39645896

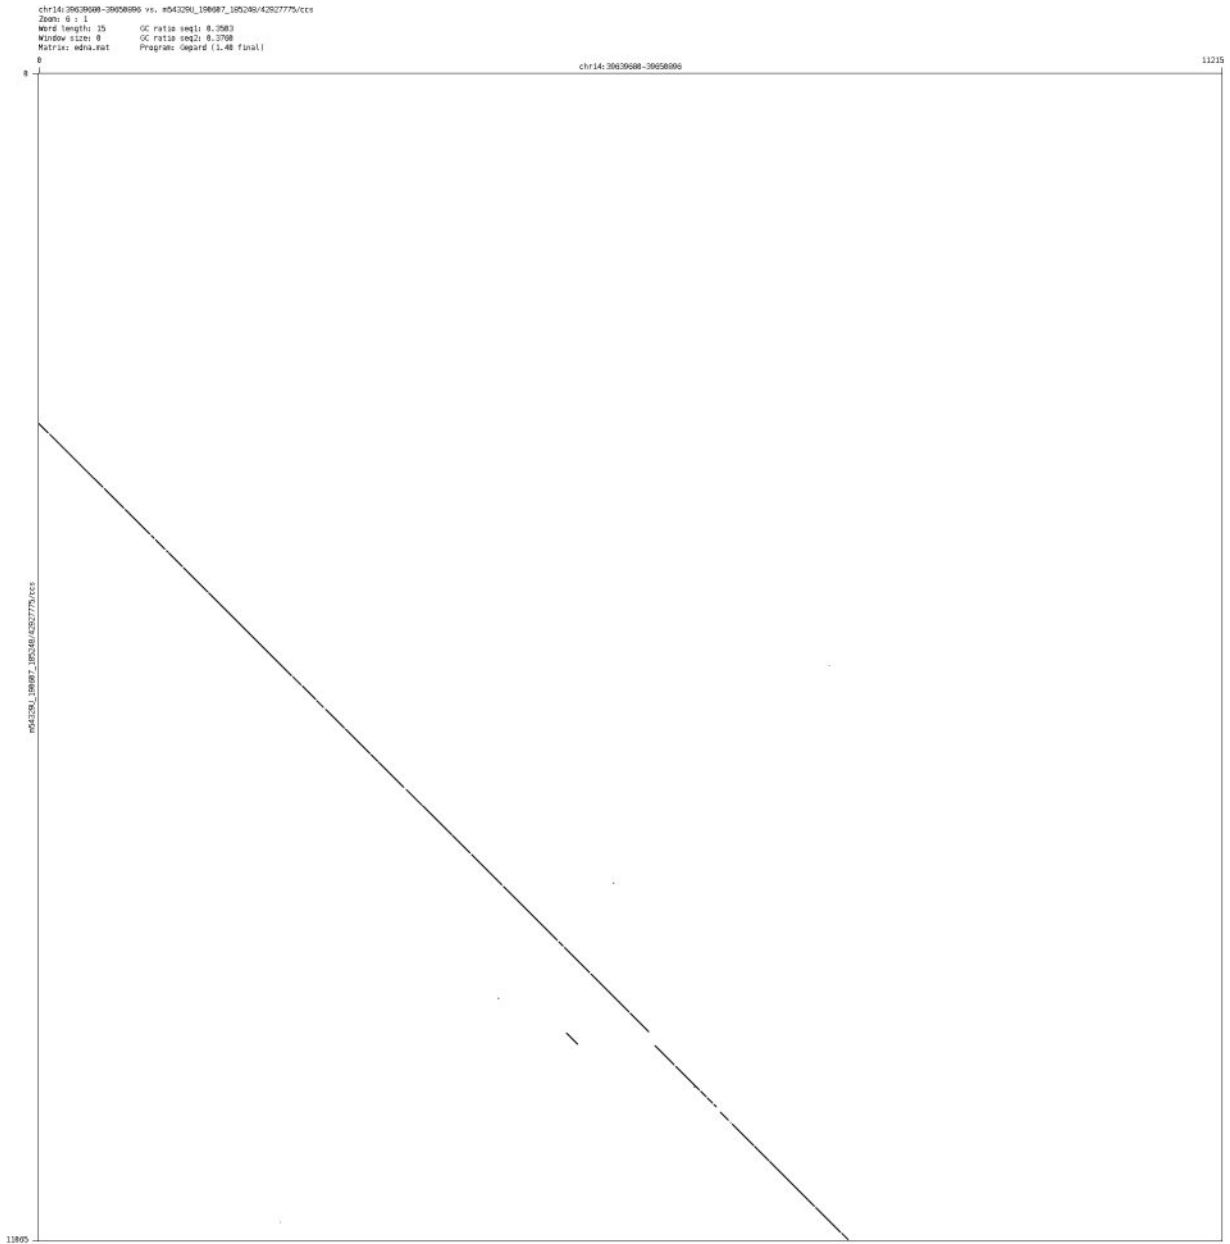

➤ chr14\_40906700\_40907954

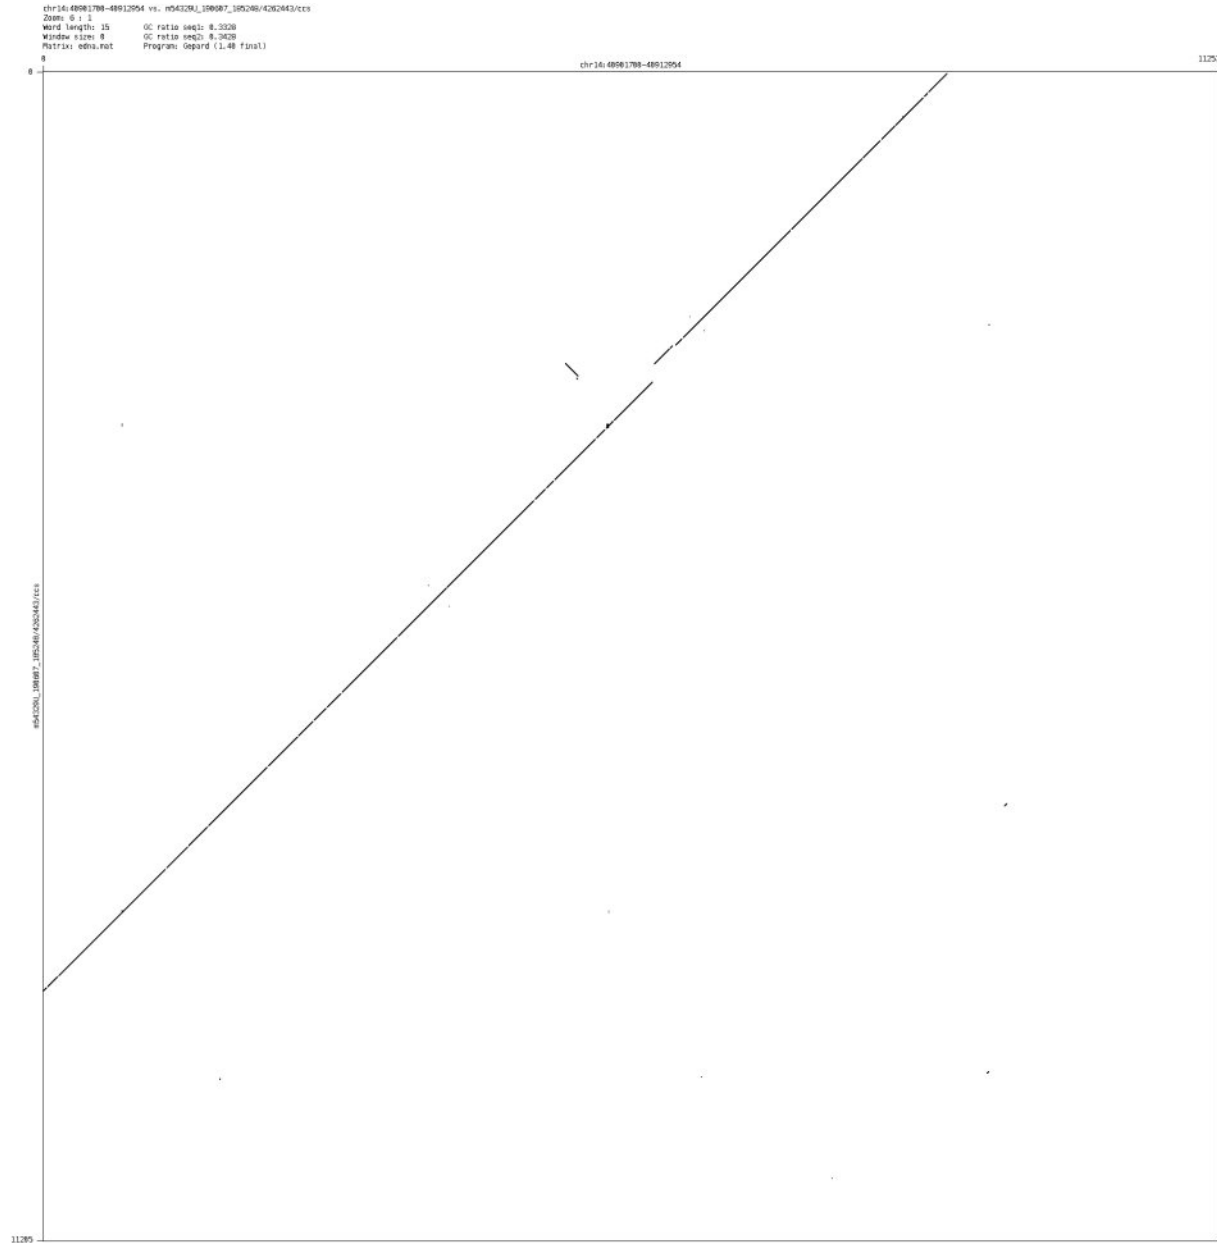

➤ chr14\_47854498\_47856278

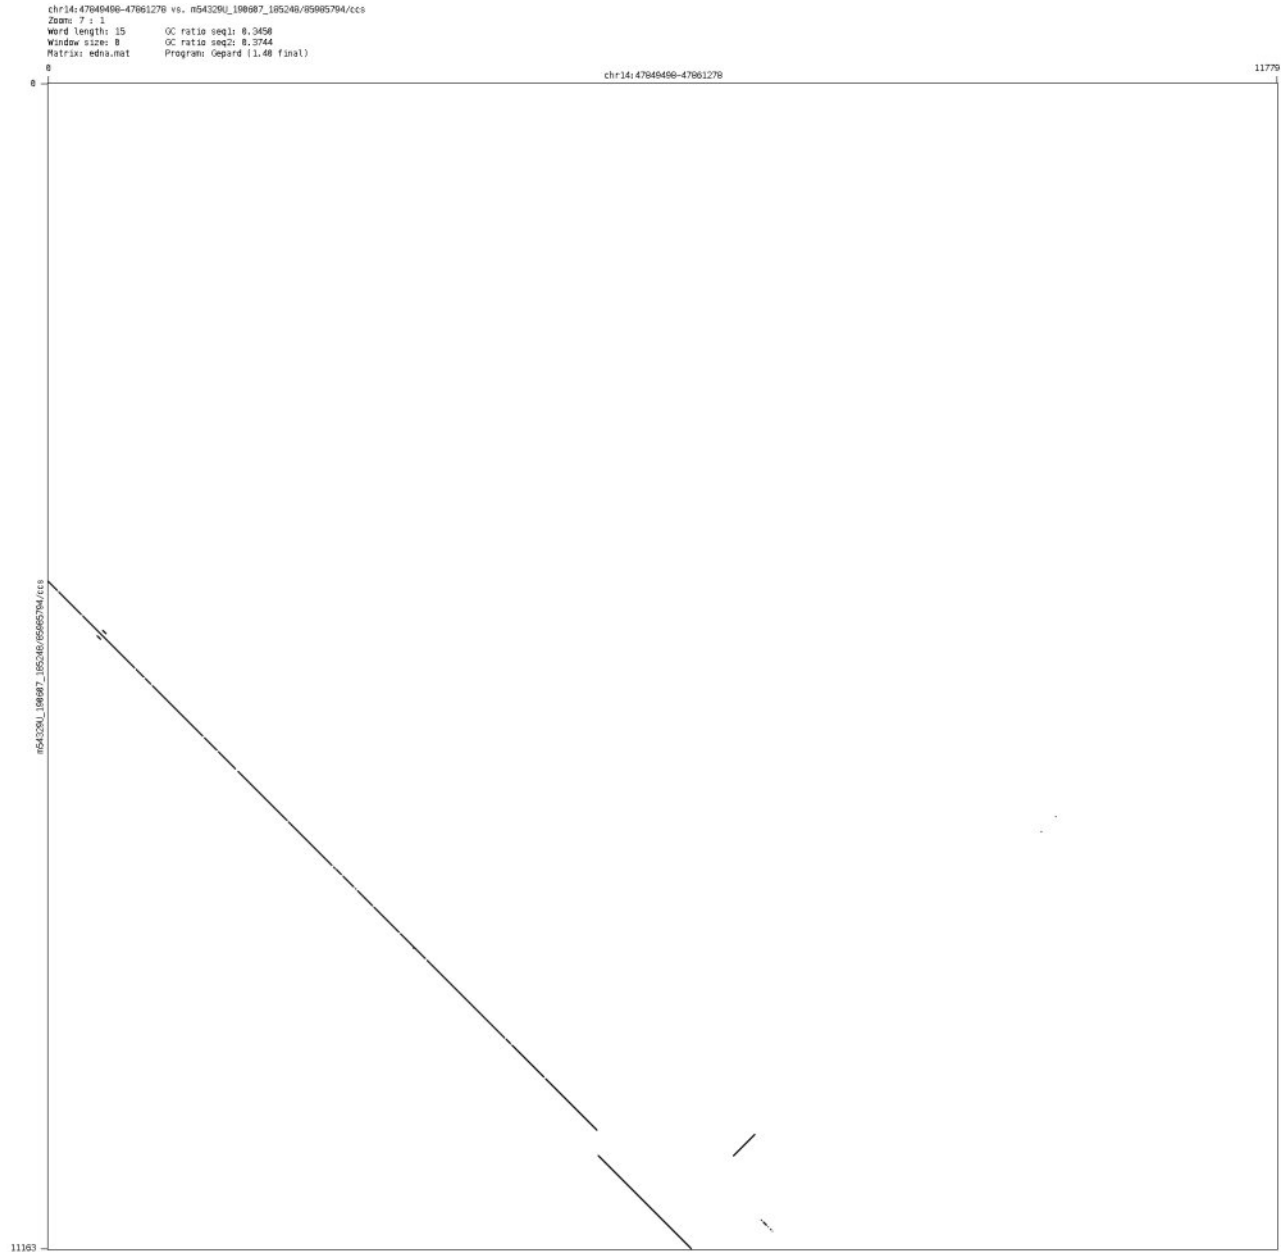

➤ chr14\_65375836\_65376948

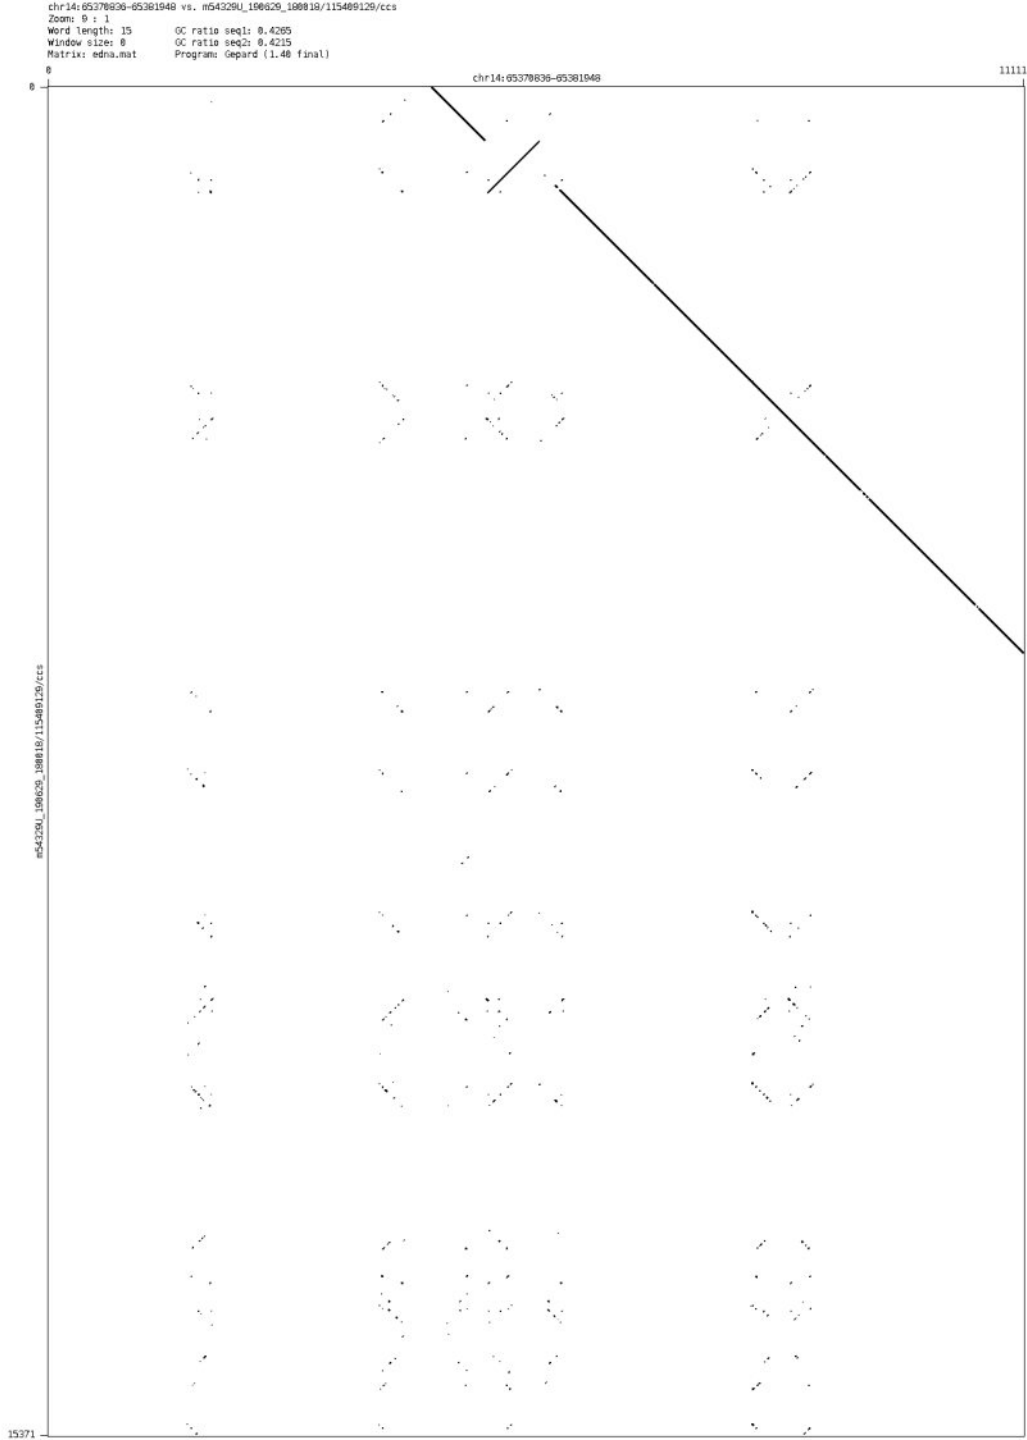

➤ chr14\_65791578\_65791692

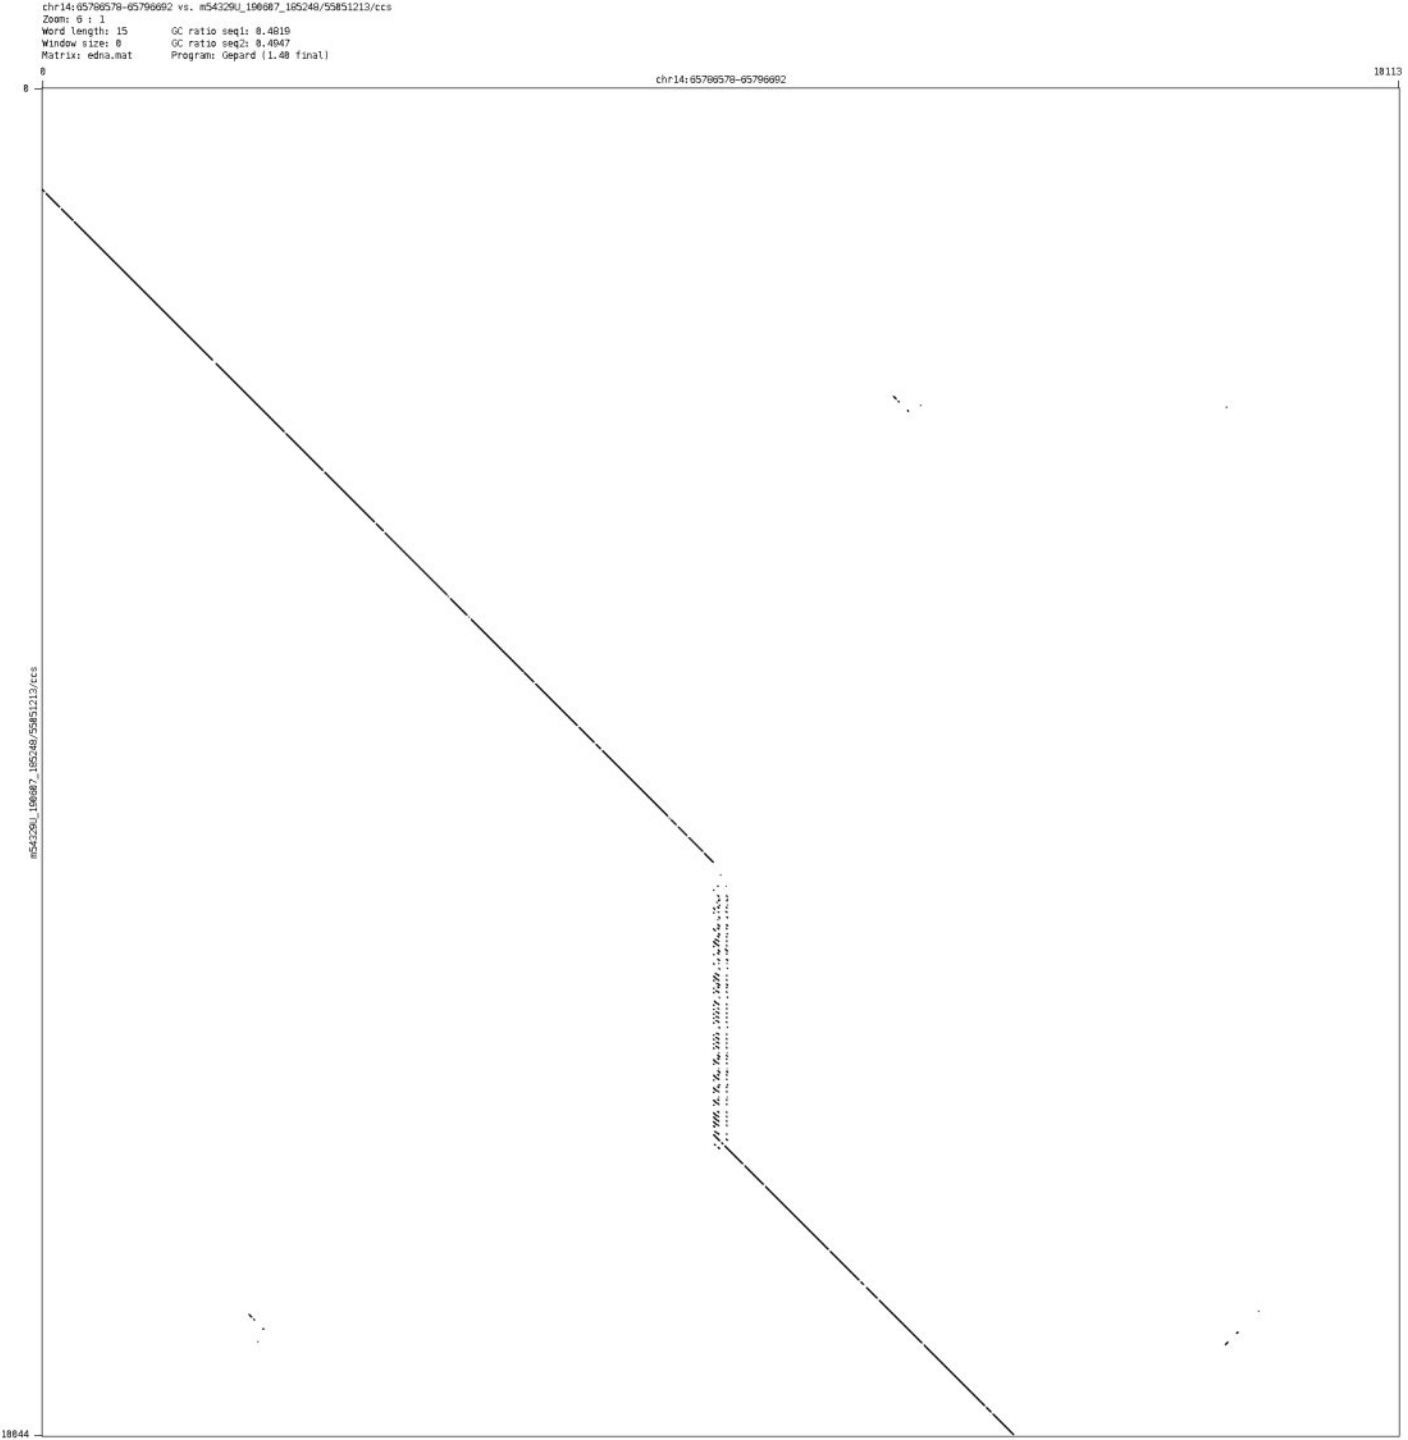

➤ chr14\_91293420\_91293512

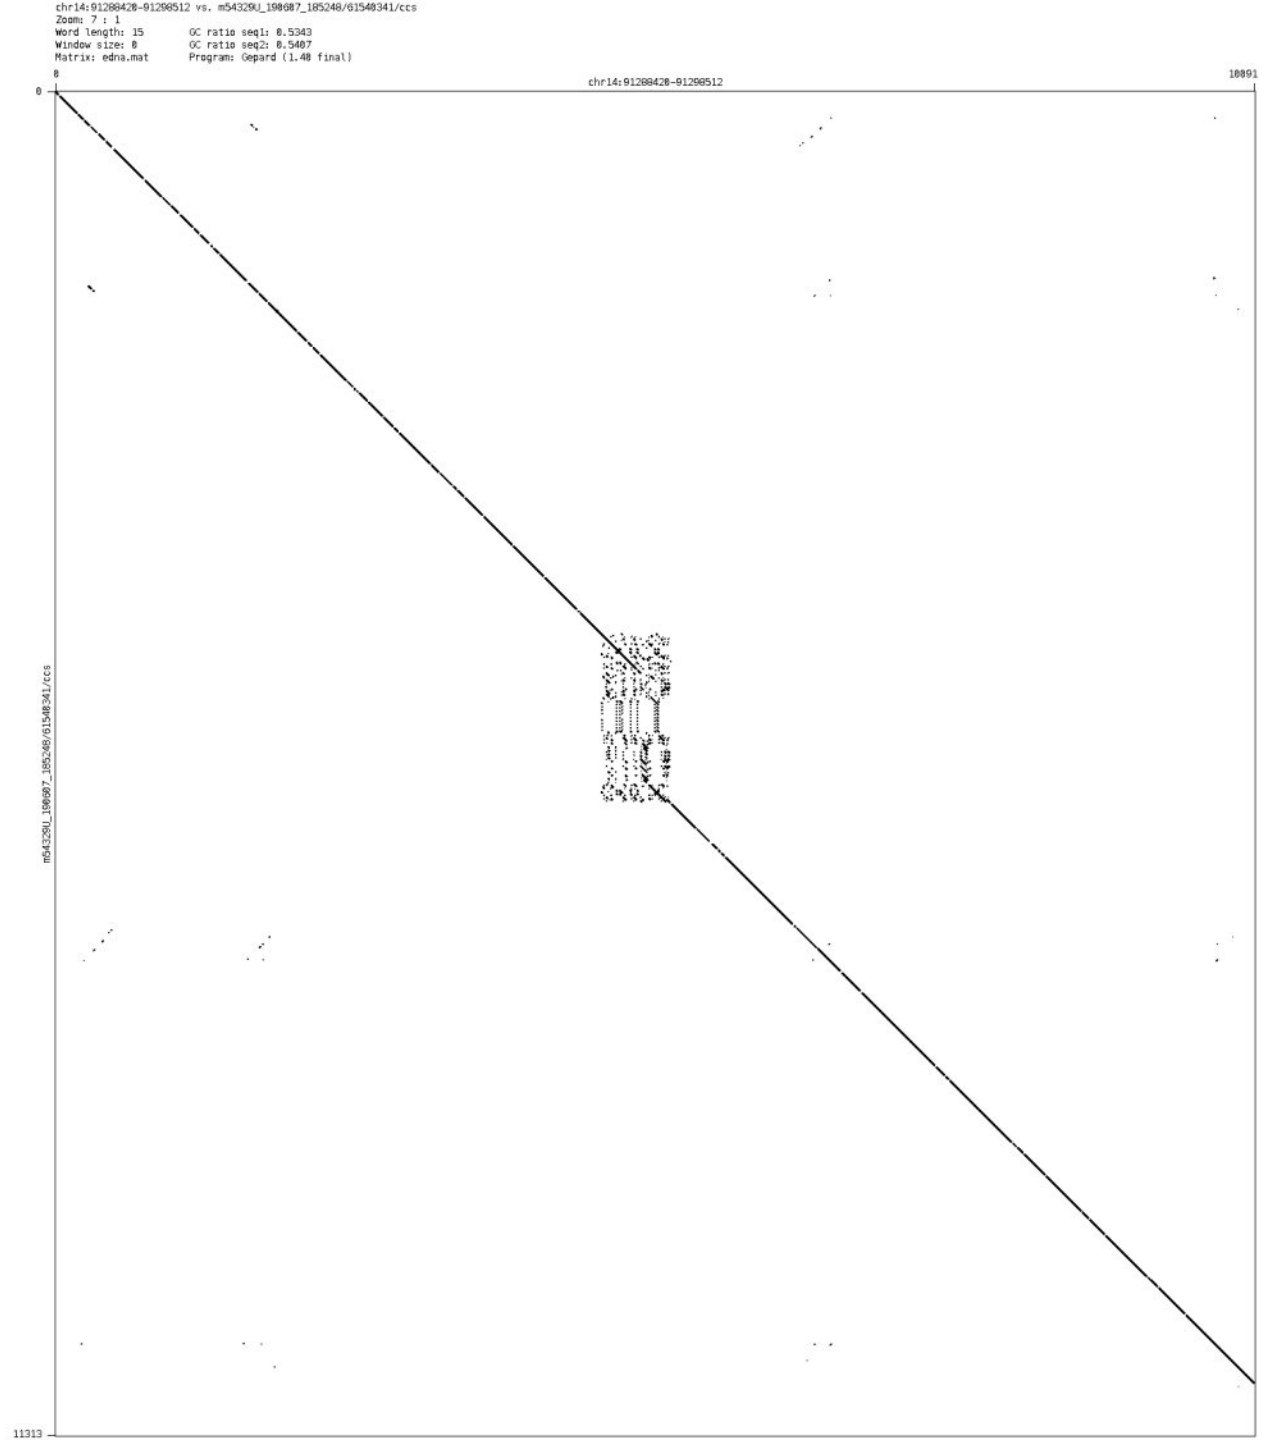

➤ chr14\_99927890\_99928038

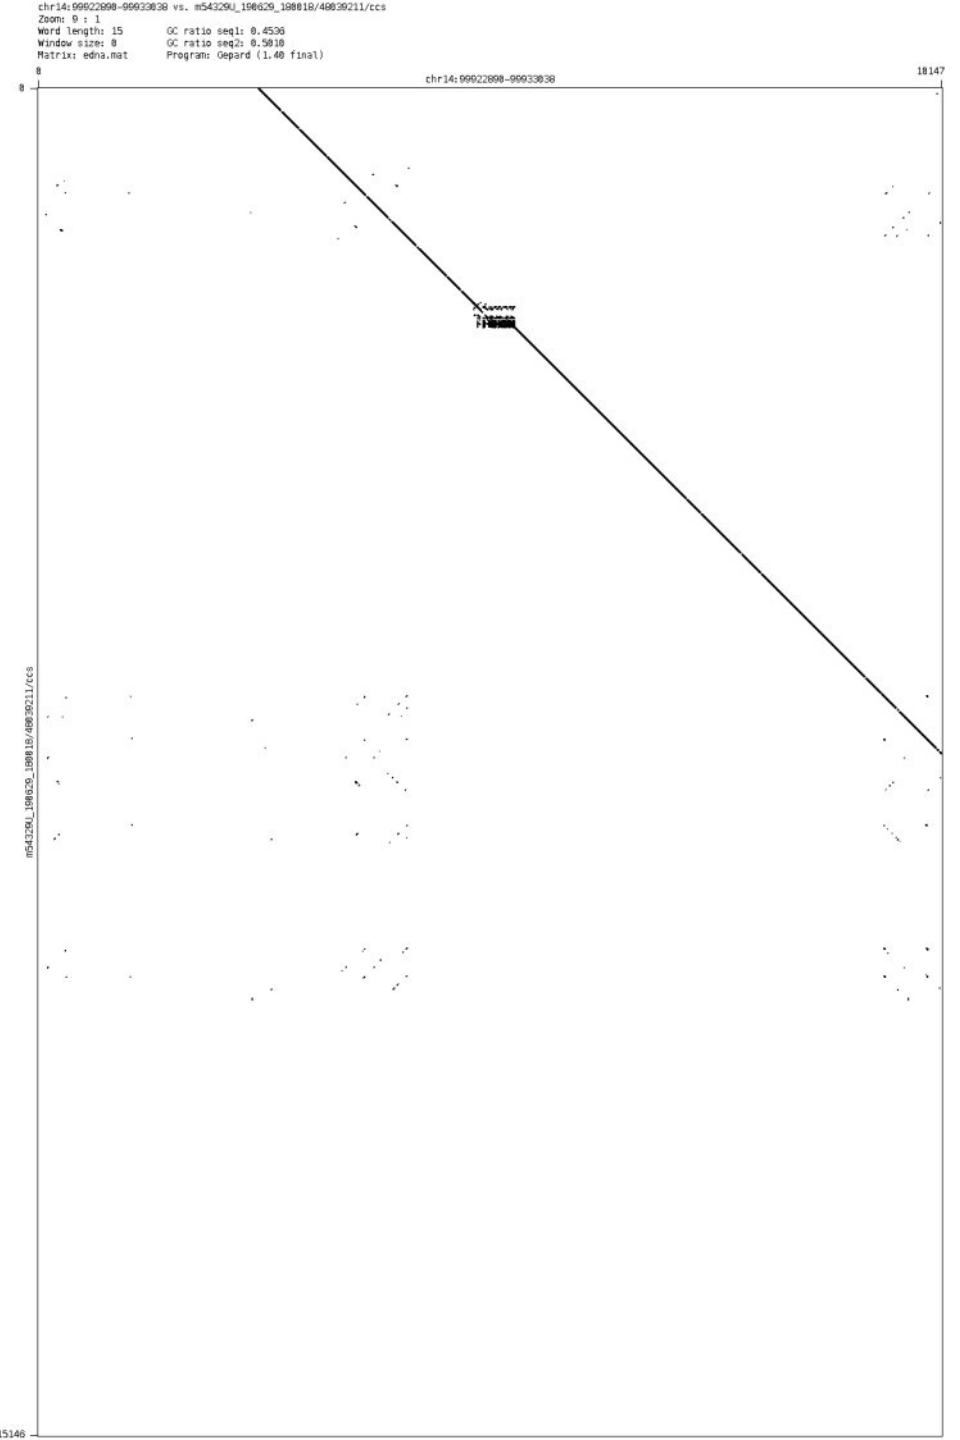



➤ chr14\_100526791\_100526935

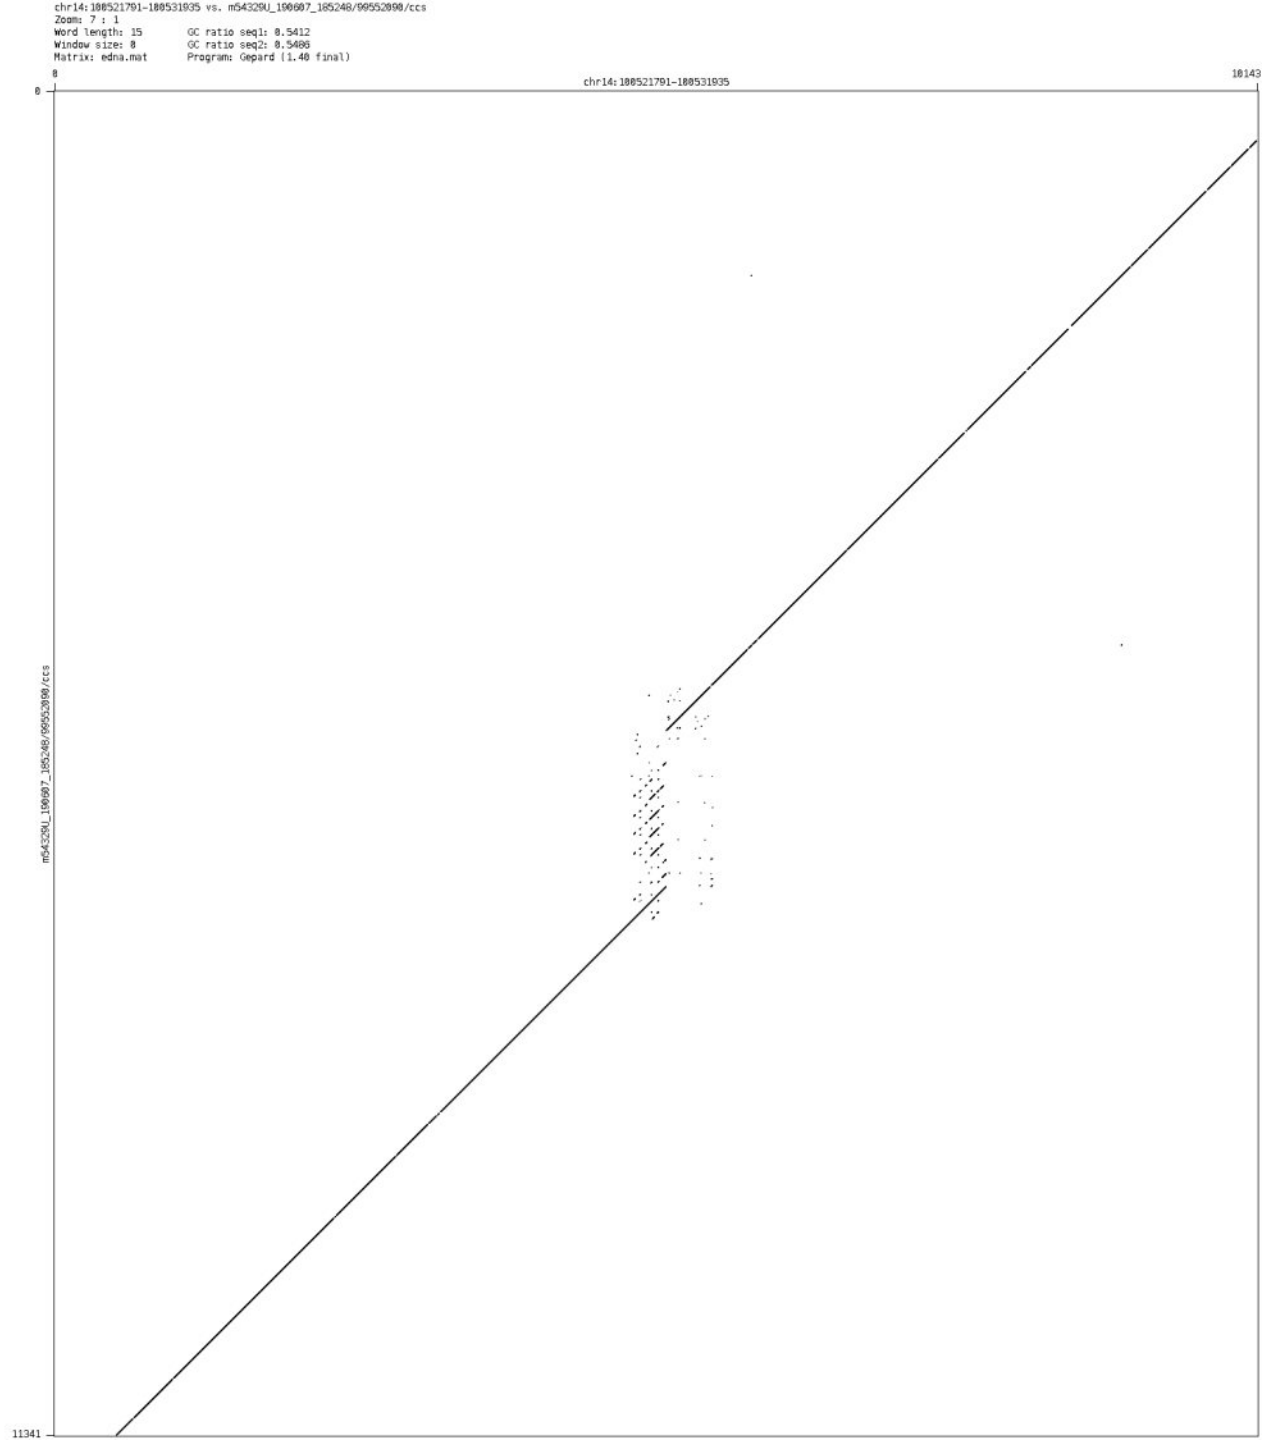

➤ chr14\_100873355\_100873423

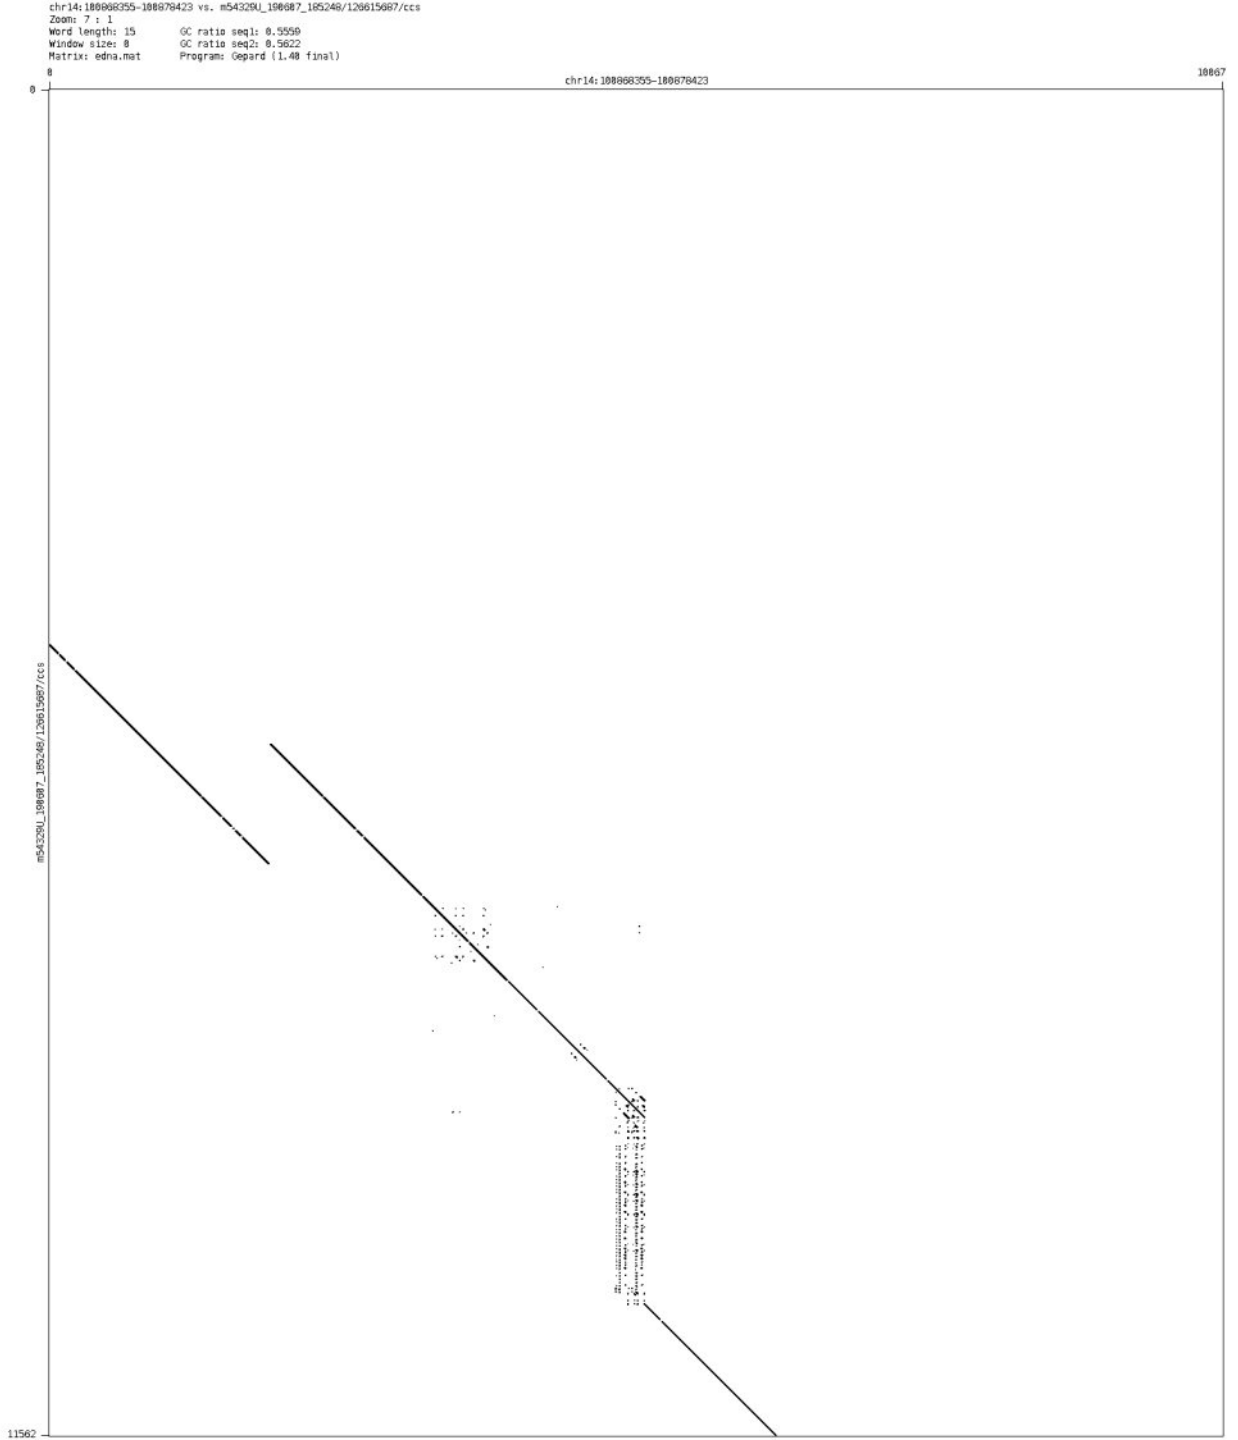

➤ chr14\_103896624\_103897749

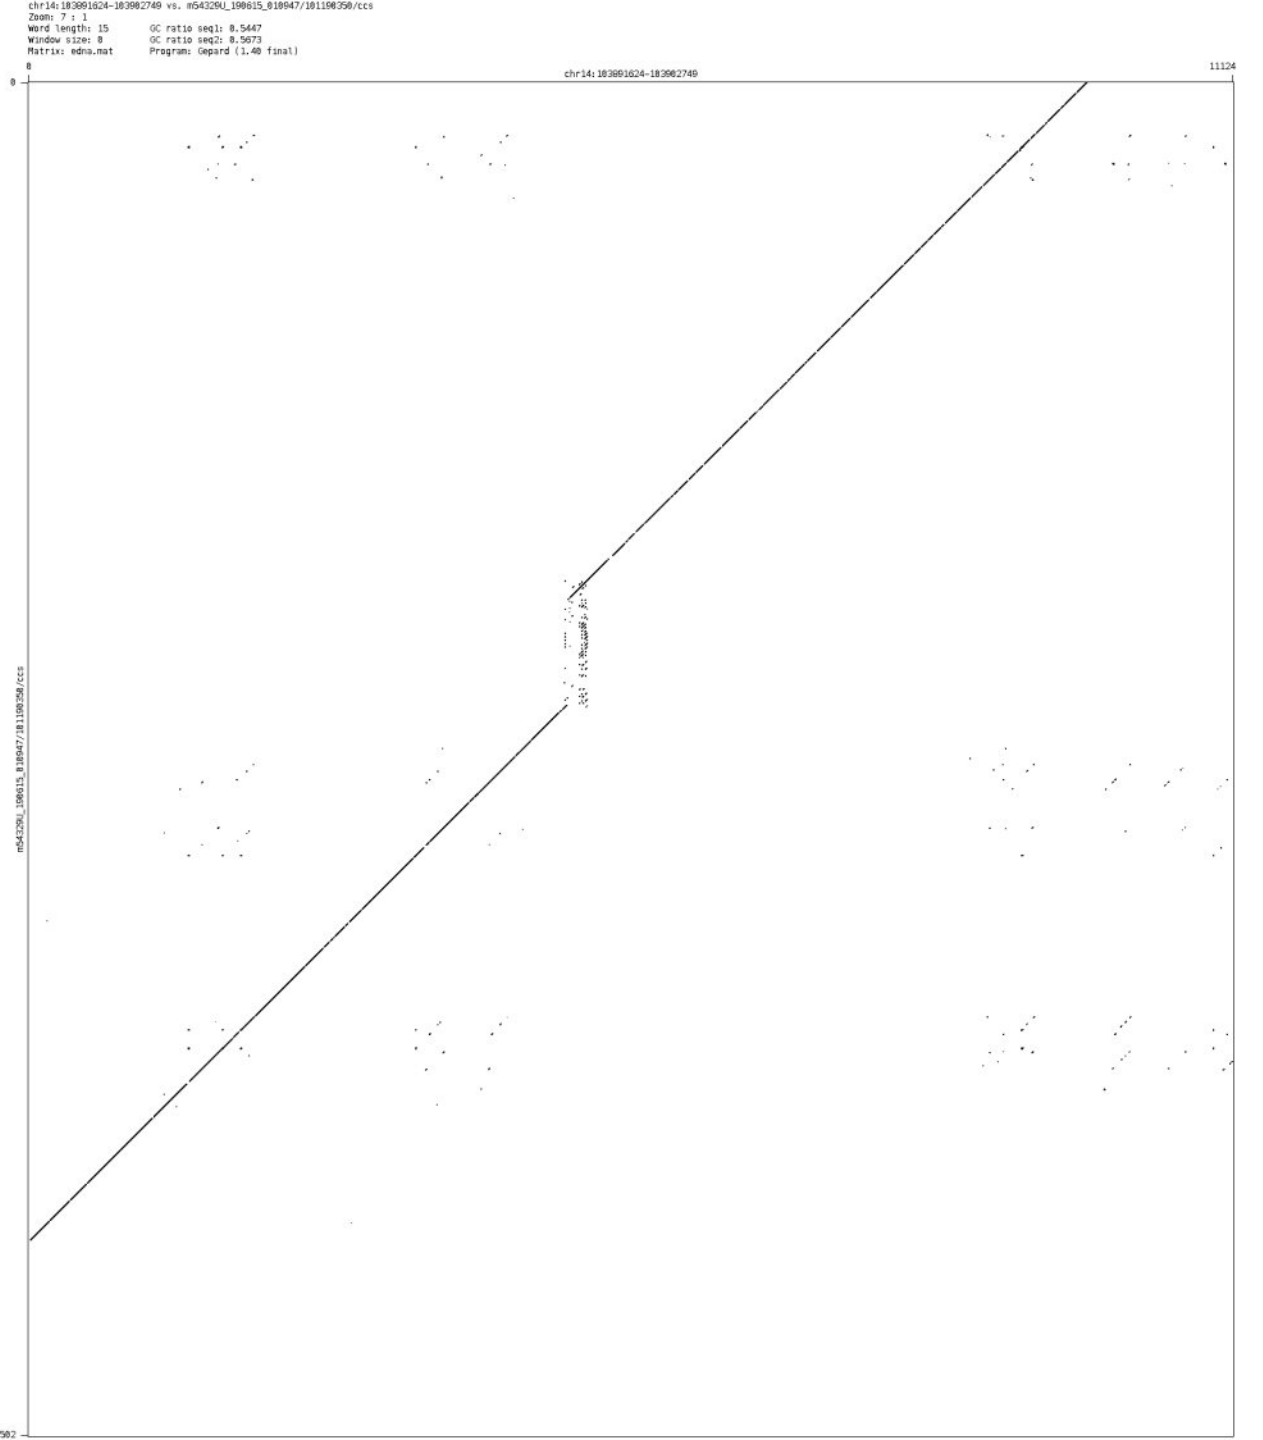

➤ chr14\_104215330\_104215464

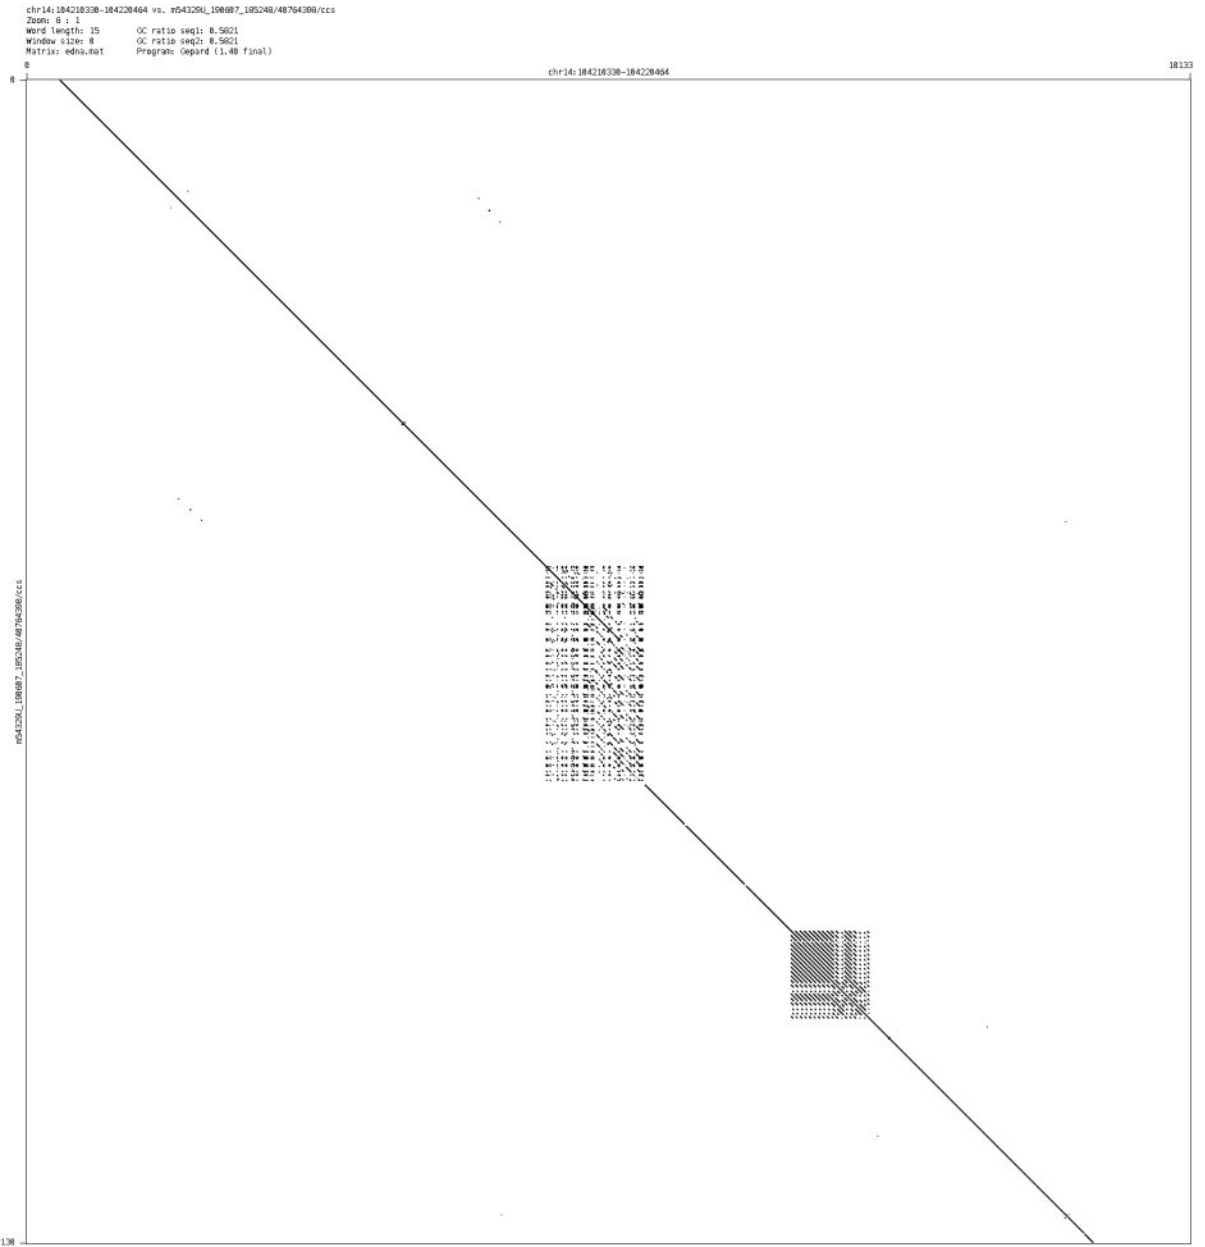

➤ chr14\_105349868\_105350042

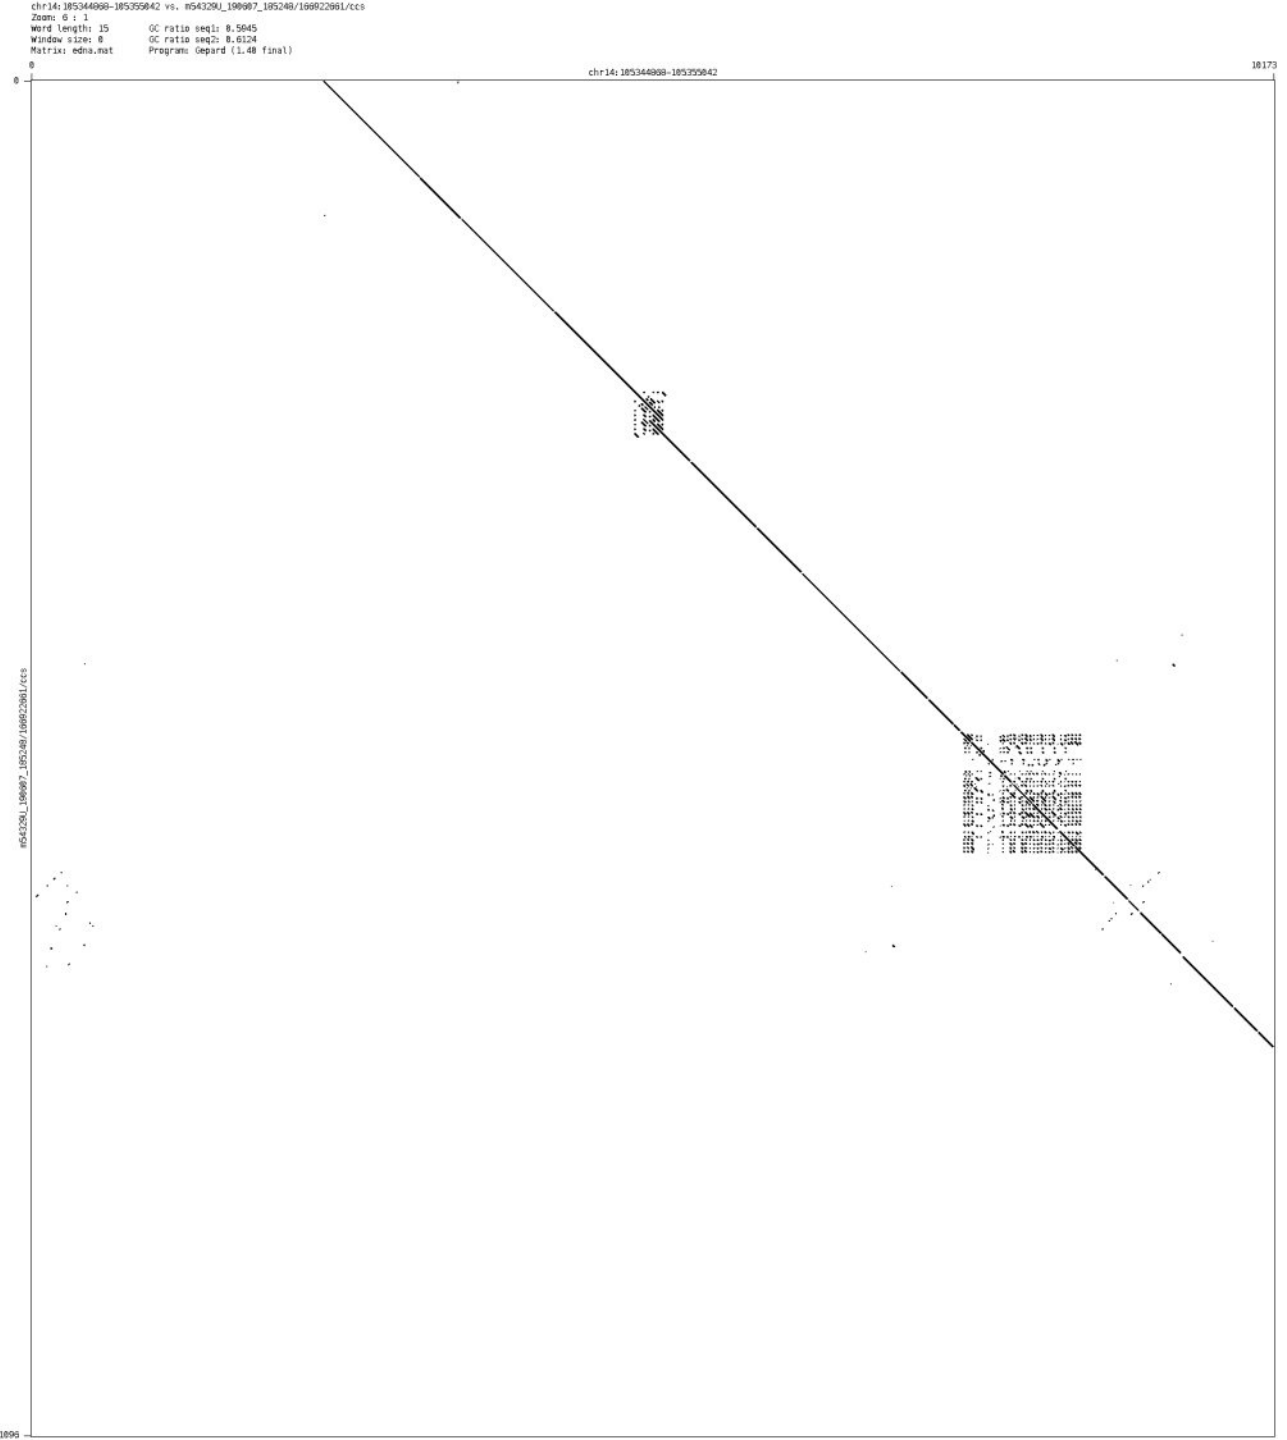

➤ chr15\_30173122\_30173230

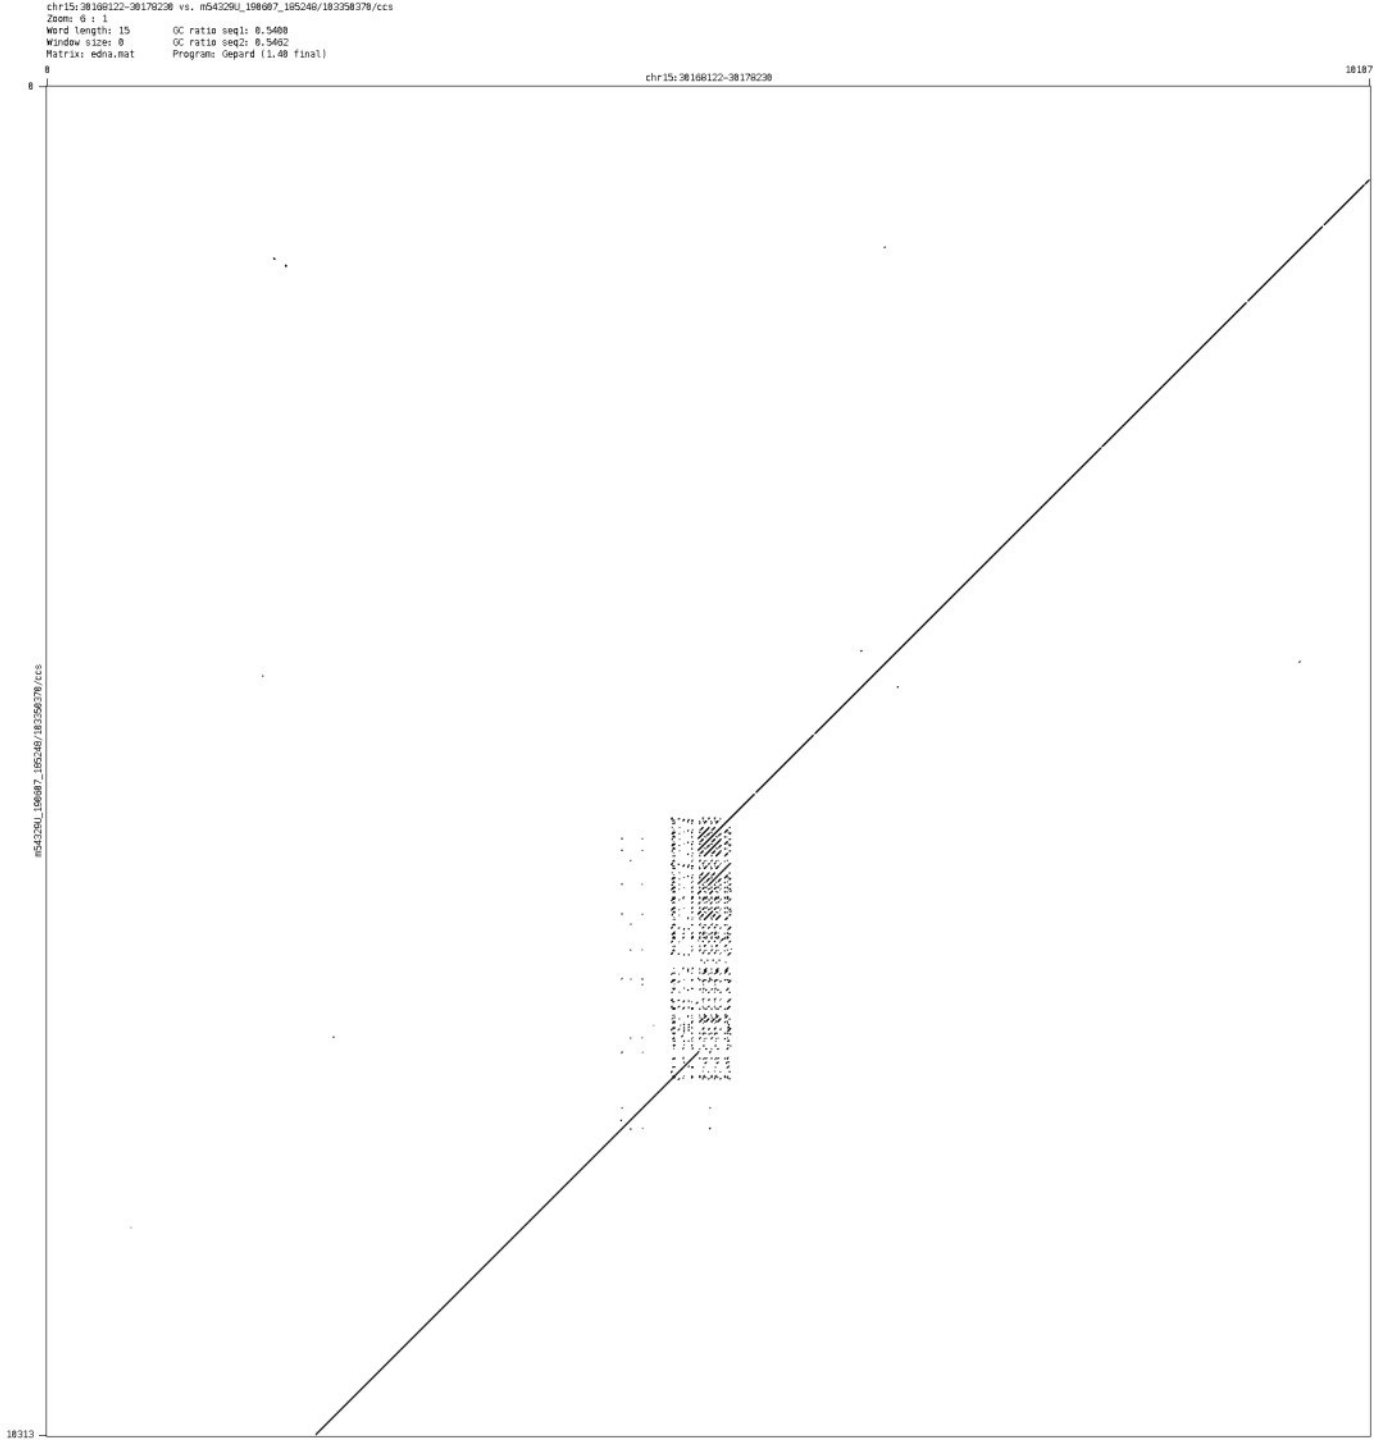

➤ chr15\_37003075\_37005371

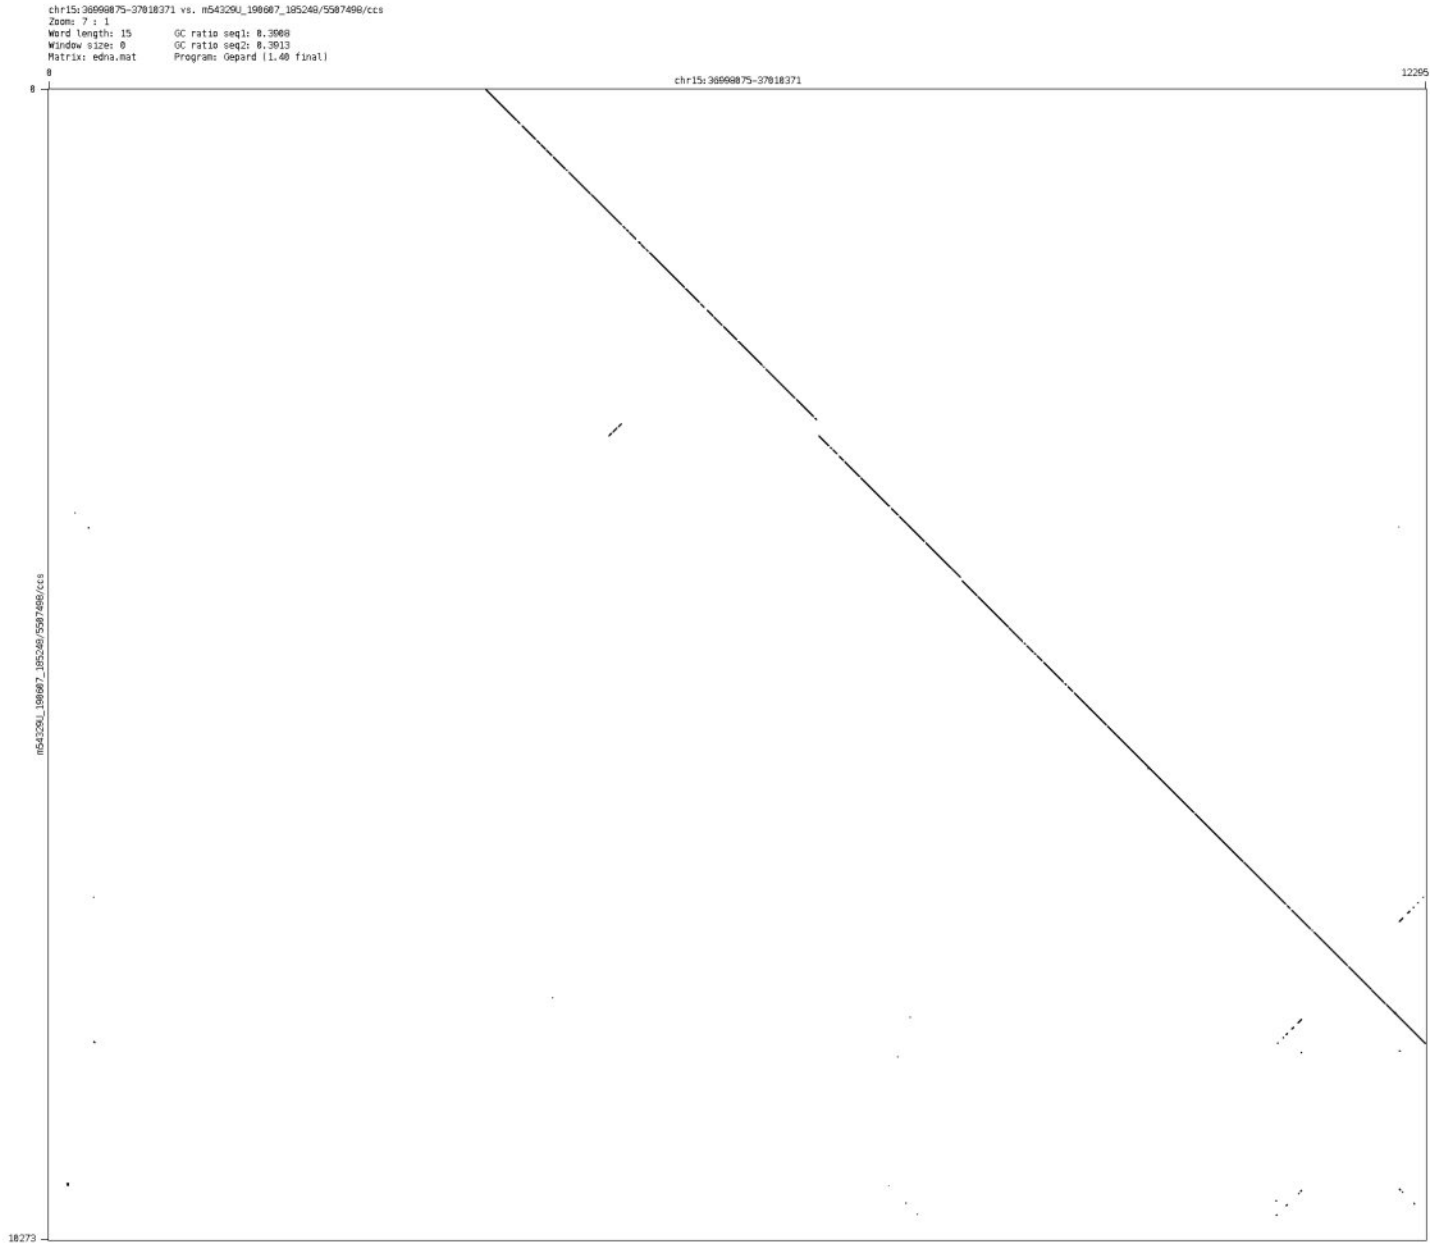

➤ chr15\_71199689\_71199869

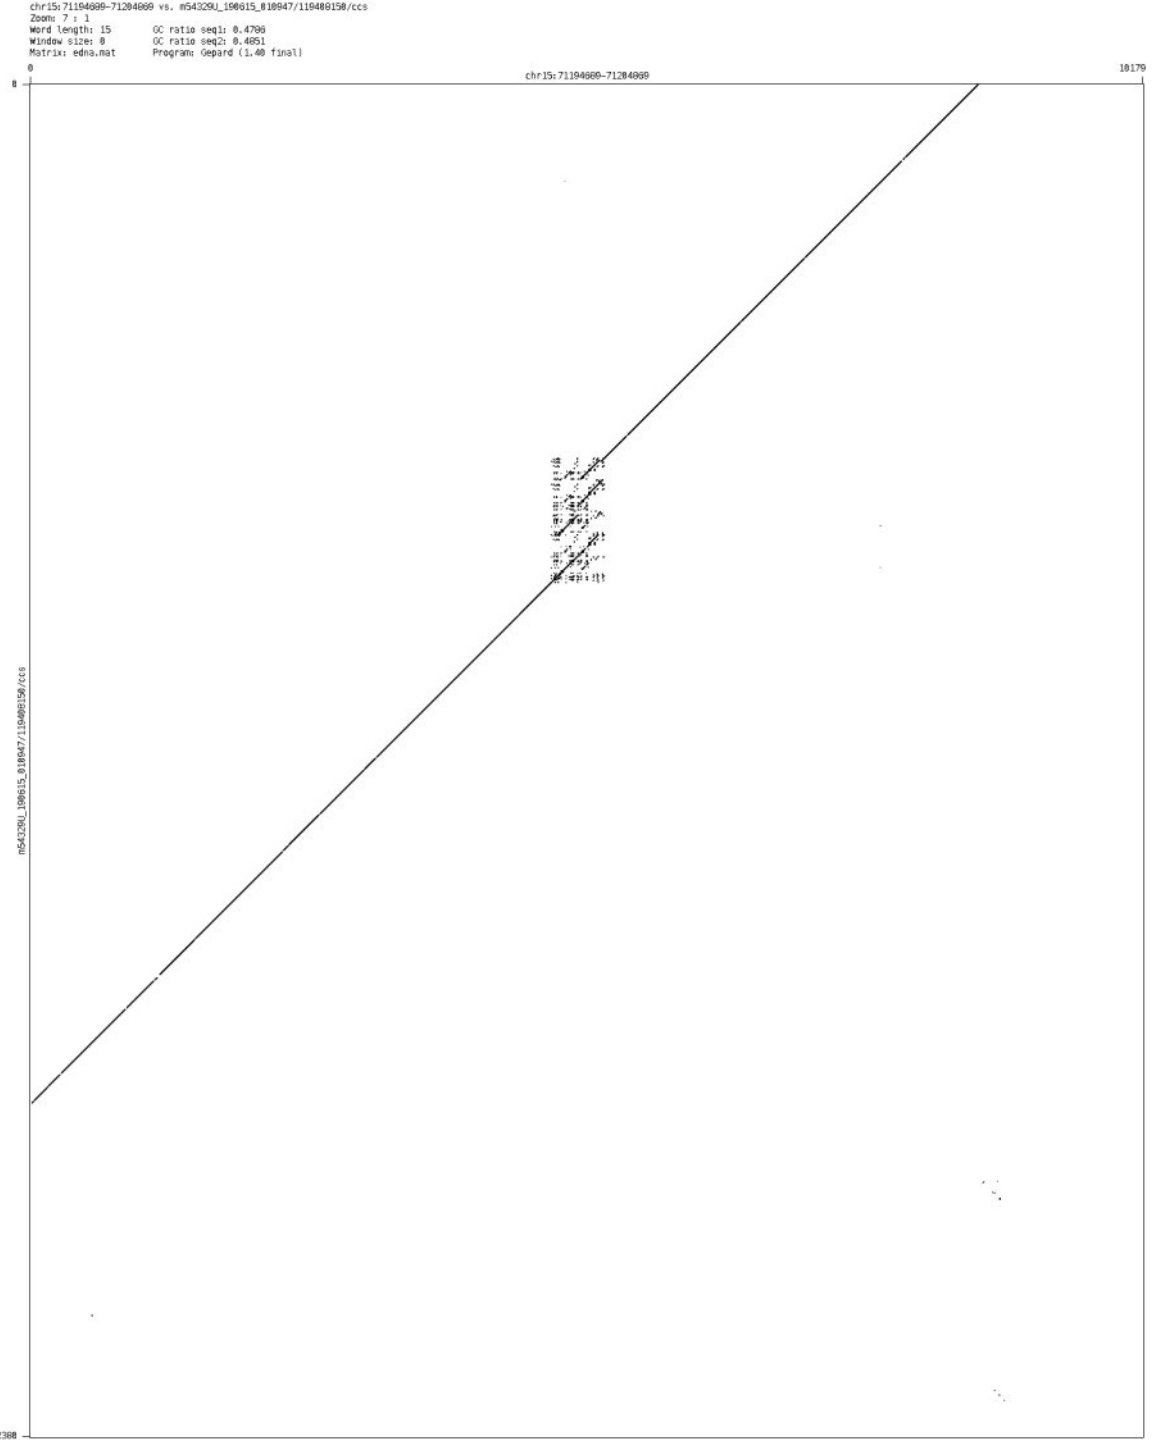



➤ chr15\_91437836\_91446359

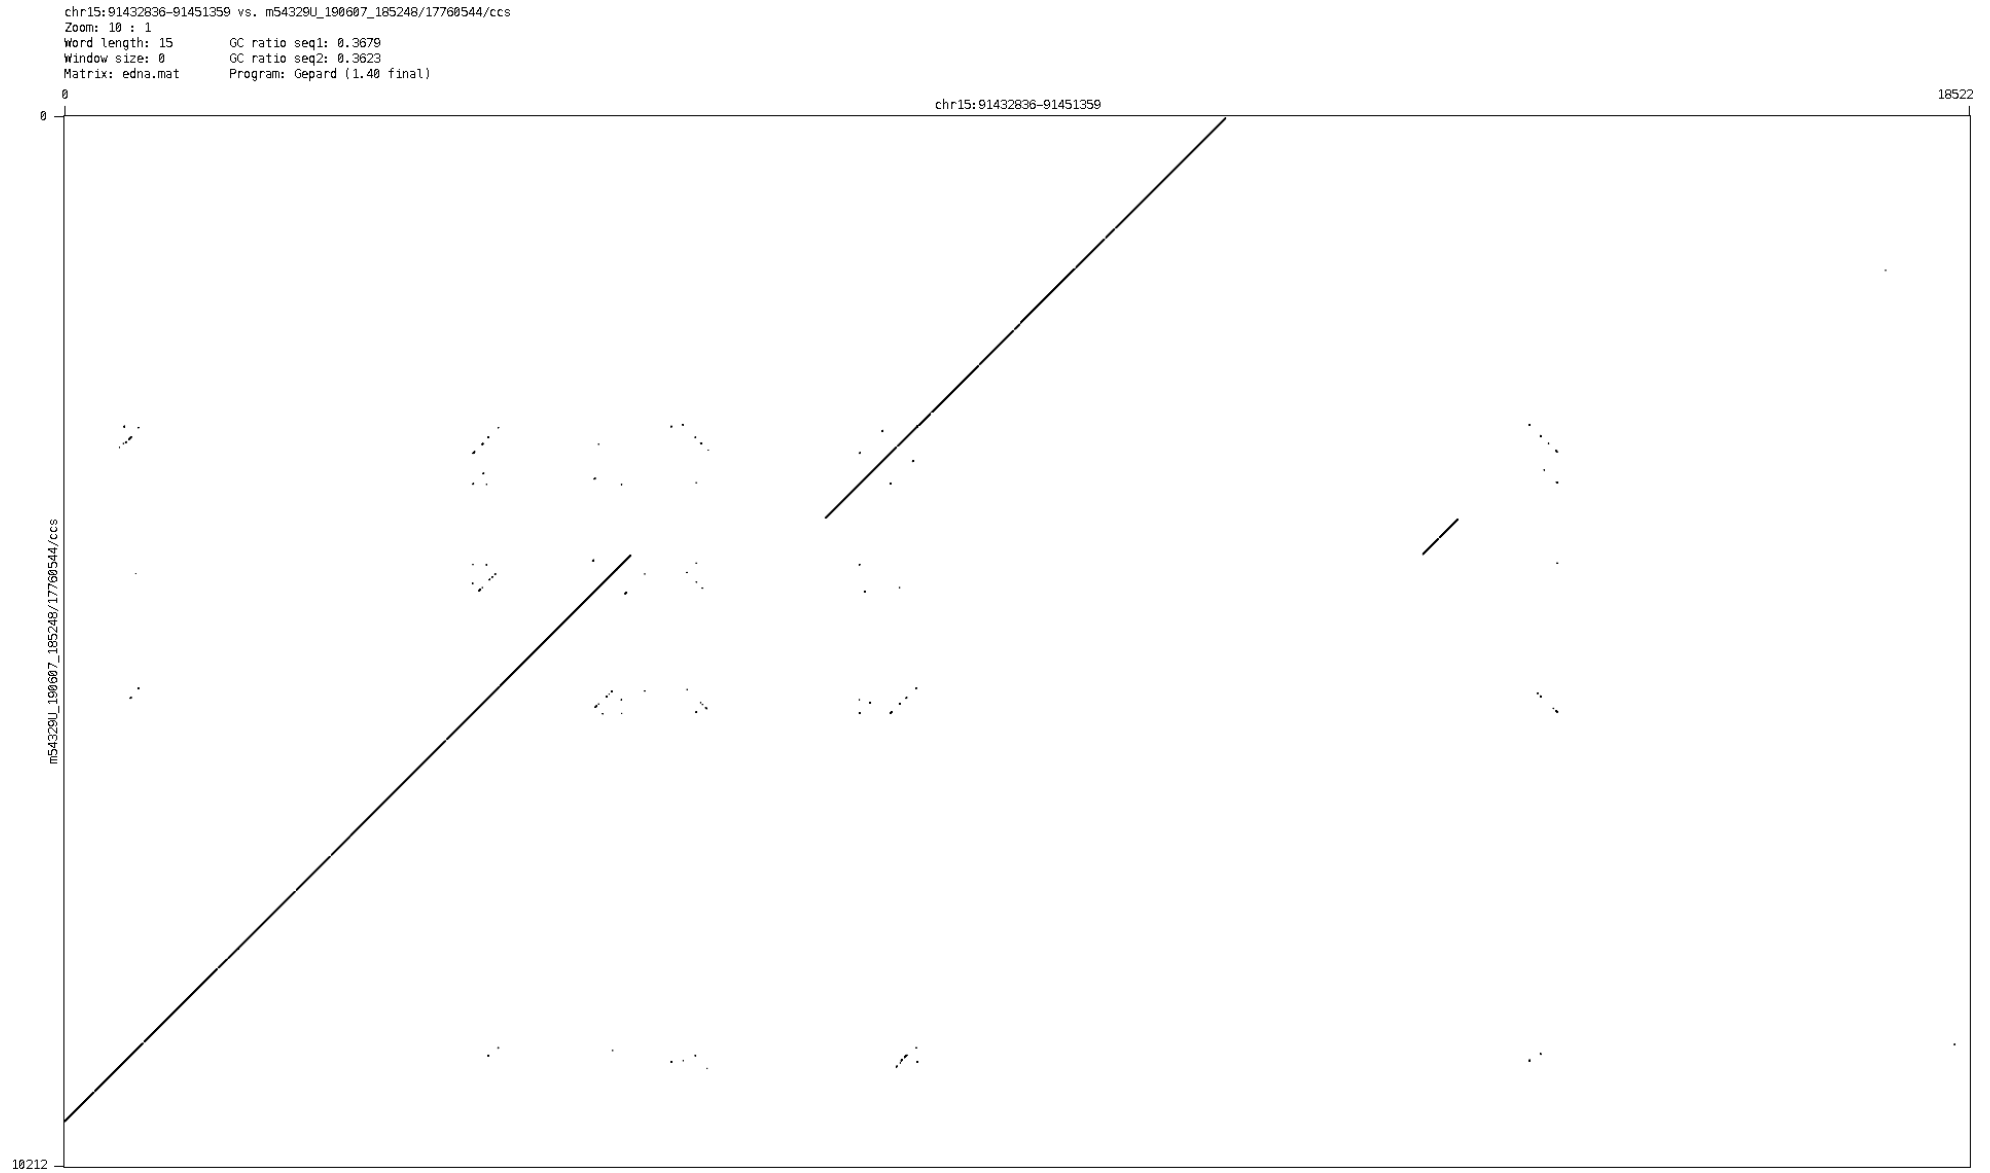

➤ chr15\_91749460\_91749774

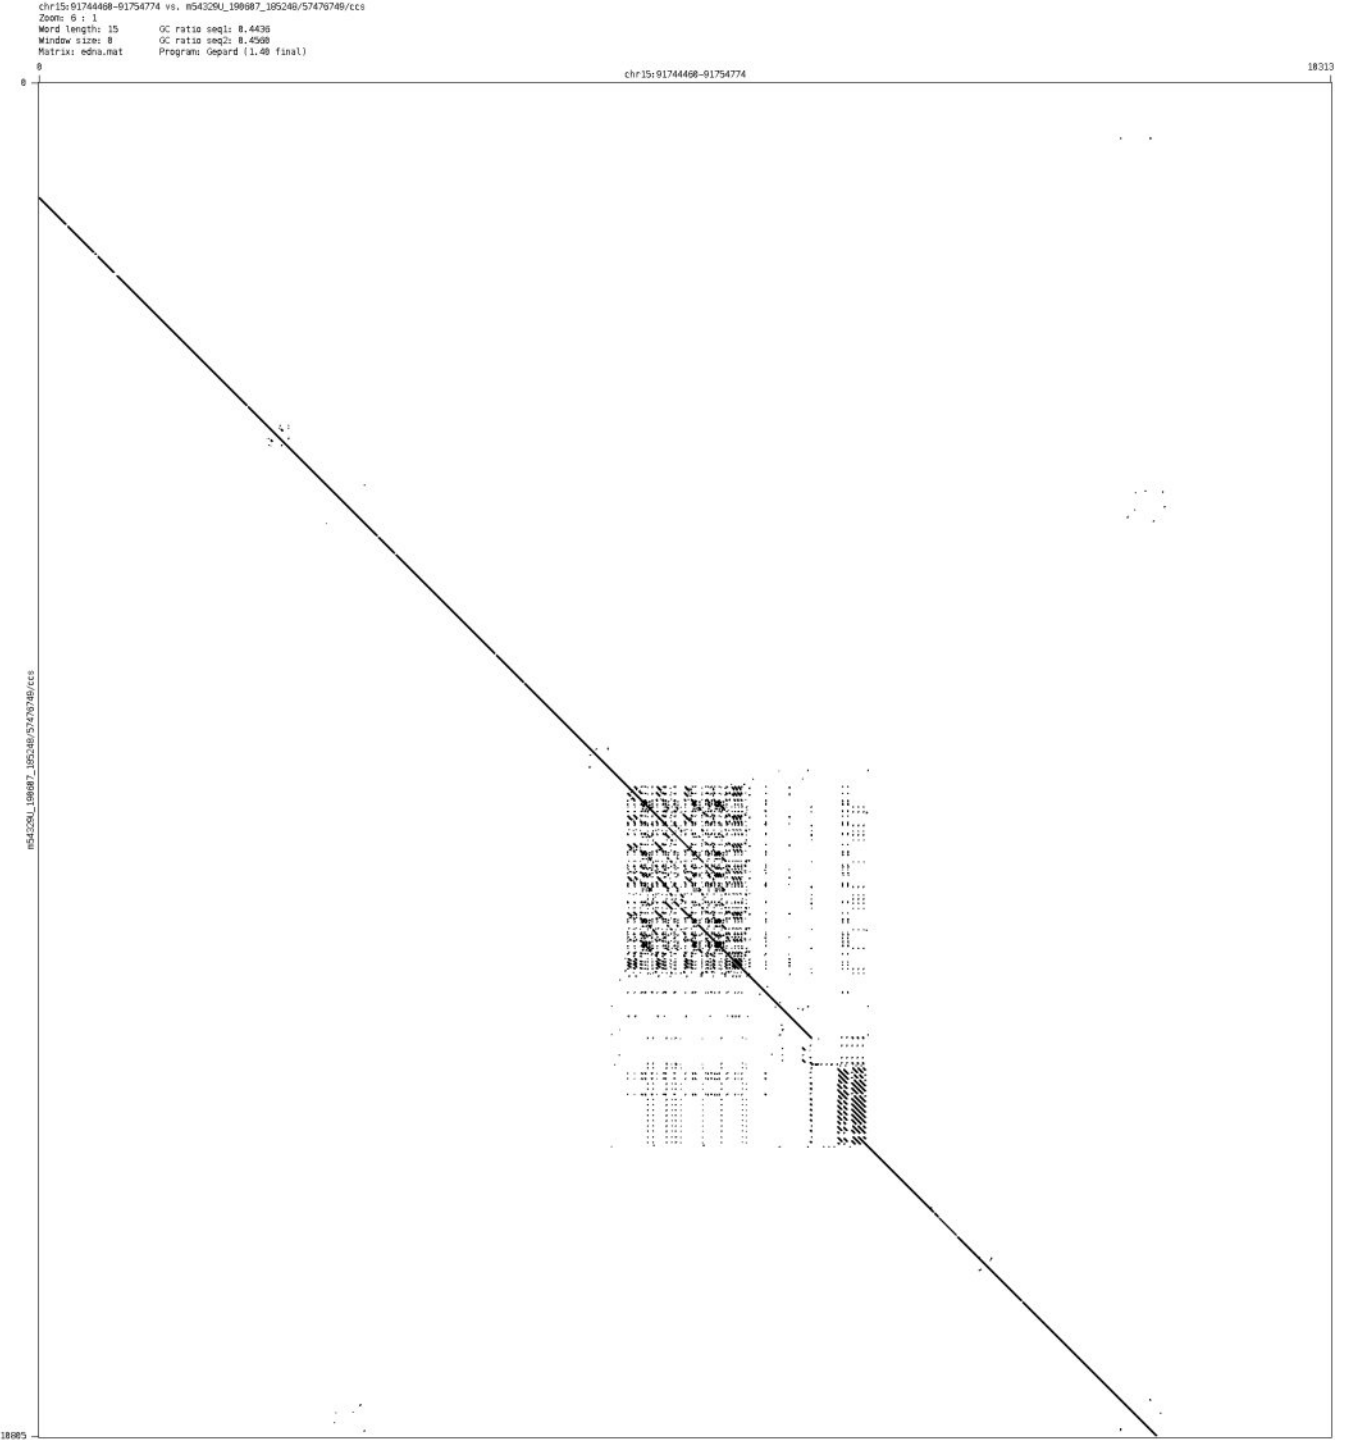

➤ chr15\_95148202\_95149527

chr15:95143202-9514527 vs. m54320\_10615\_010647/10641030/ccs  
Zoom: 7 : 1  
Word length: 15 GC ratio seq1: 0.3782  
Window size: 0 GC ratio seq2: 0.3751  
Matrix: edna.mat Program: Gepard (1.48 final)

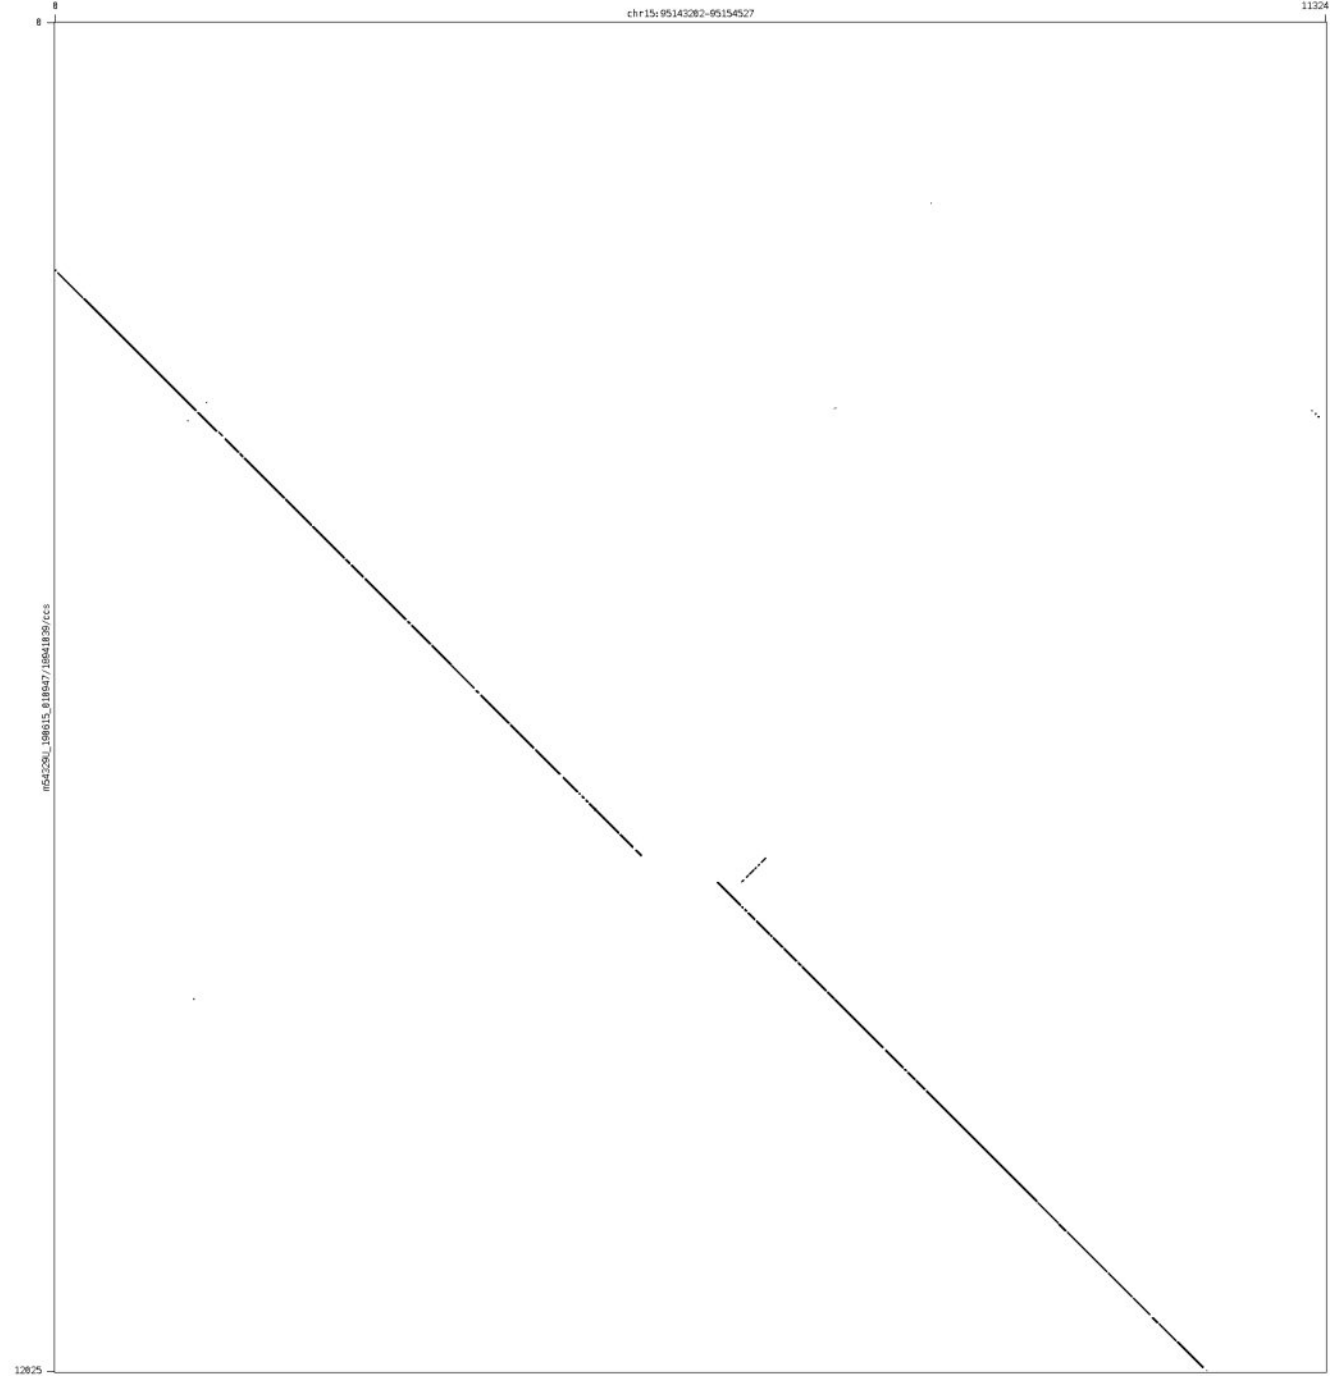

➤ chr15\_100058267\_100058336

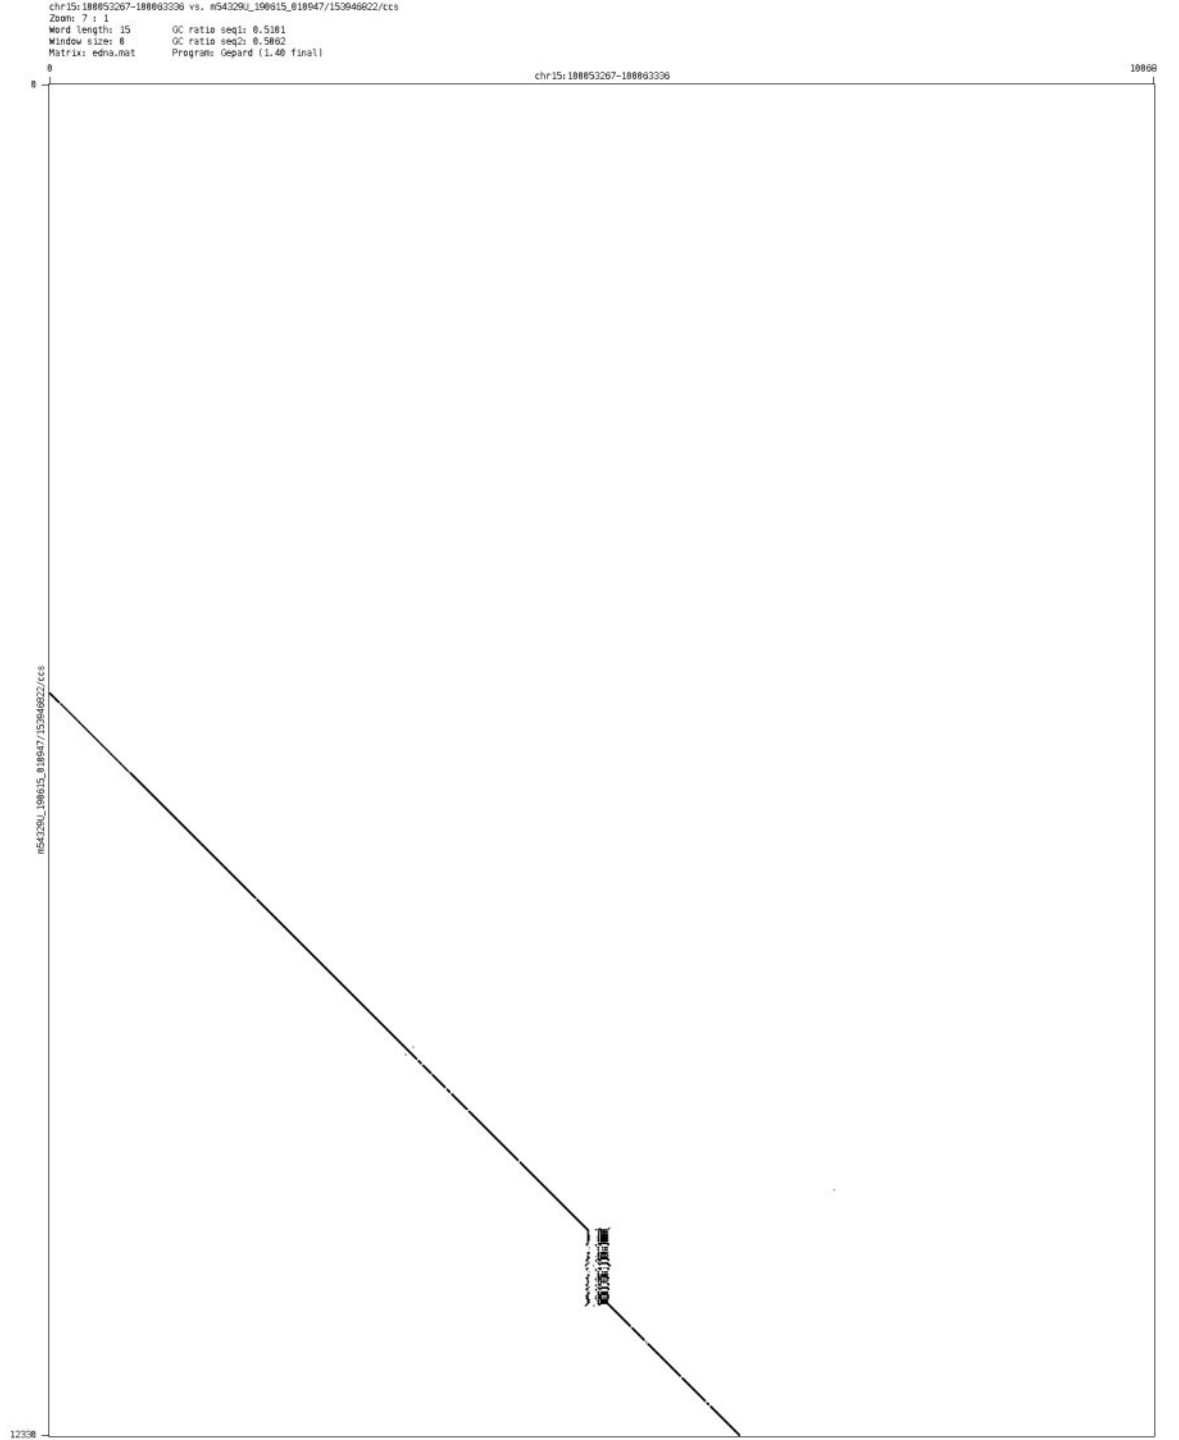

➤ chr15\_100710334\_100710411

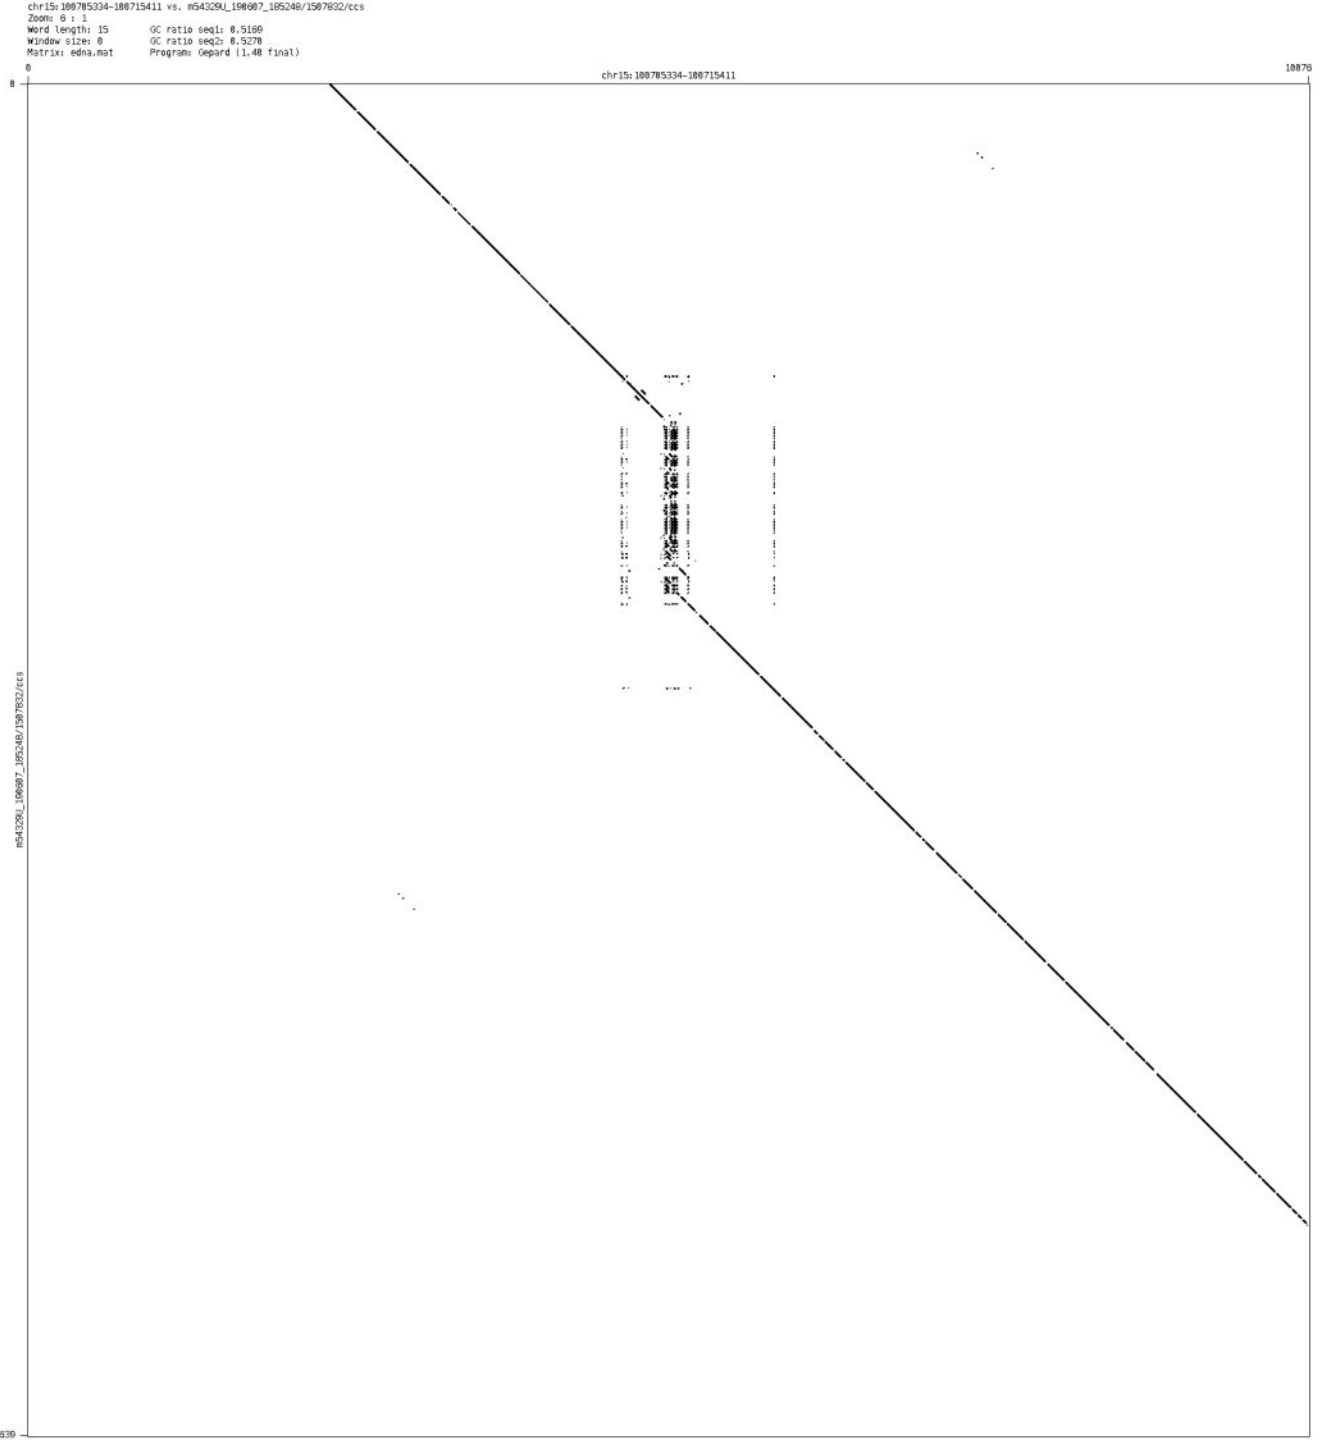

➤ chr16\_818762\_818876

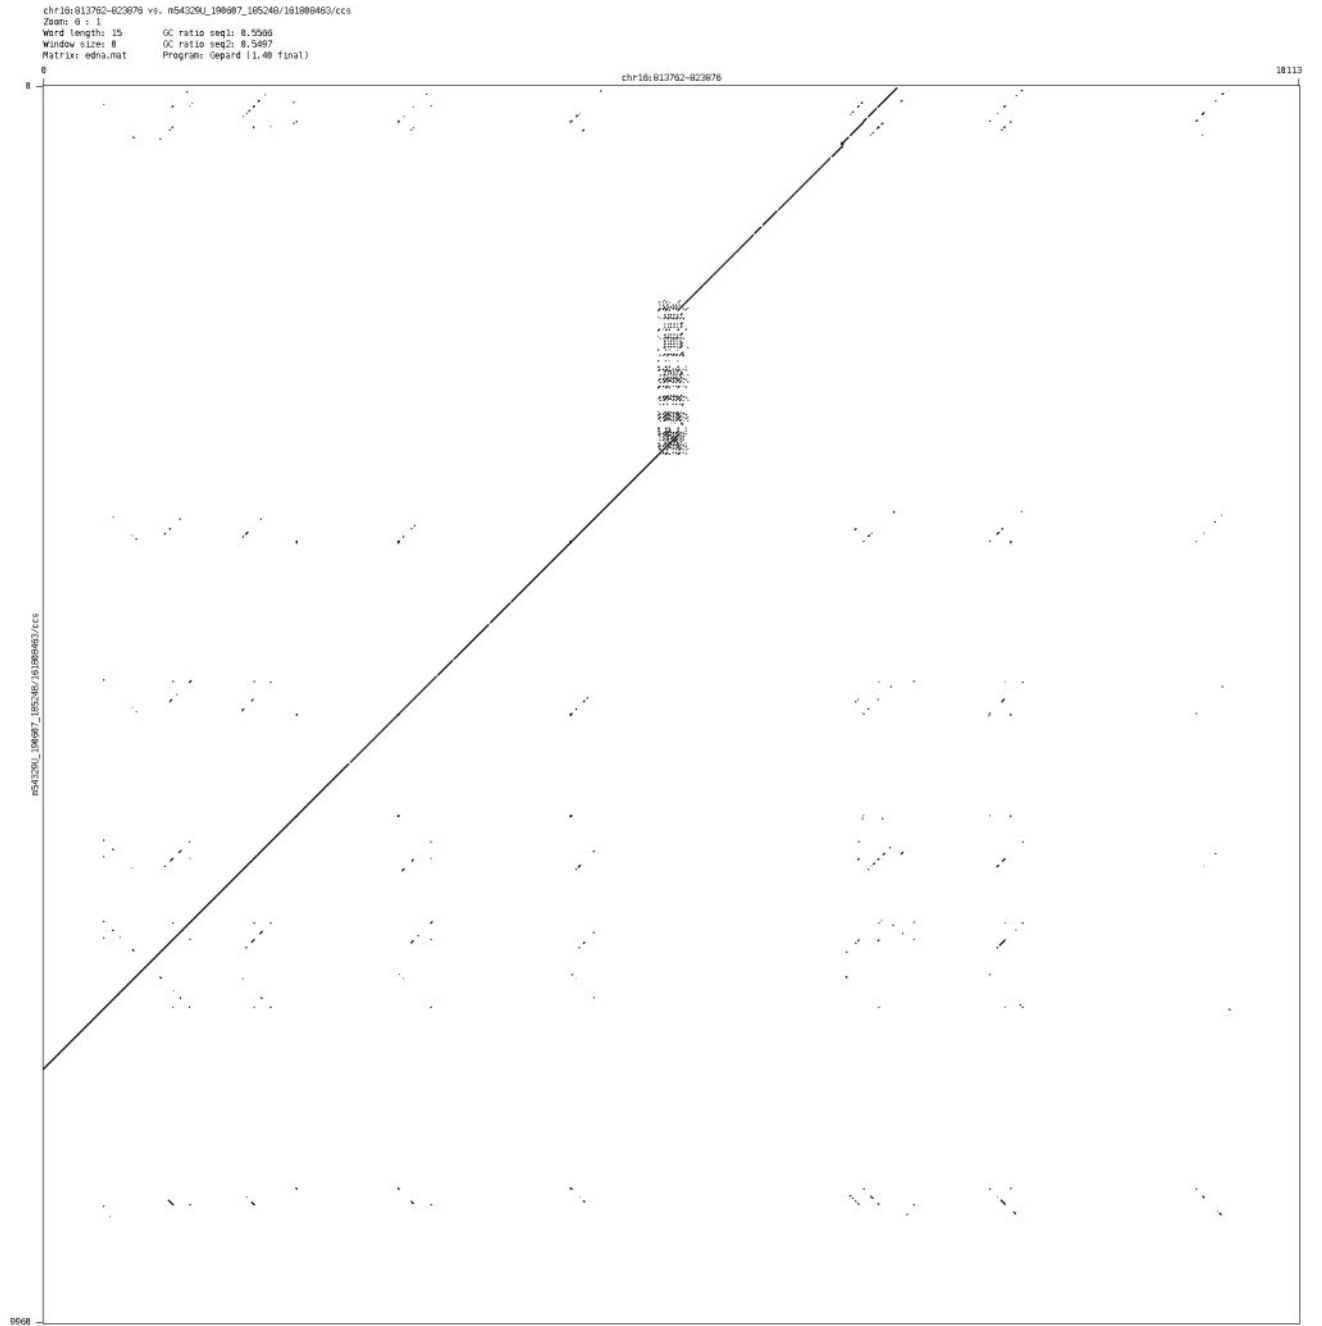

➤ chr16\_894258\_894382

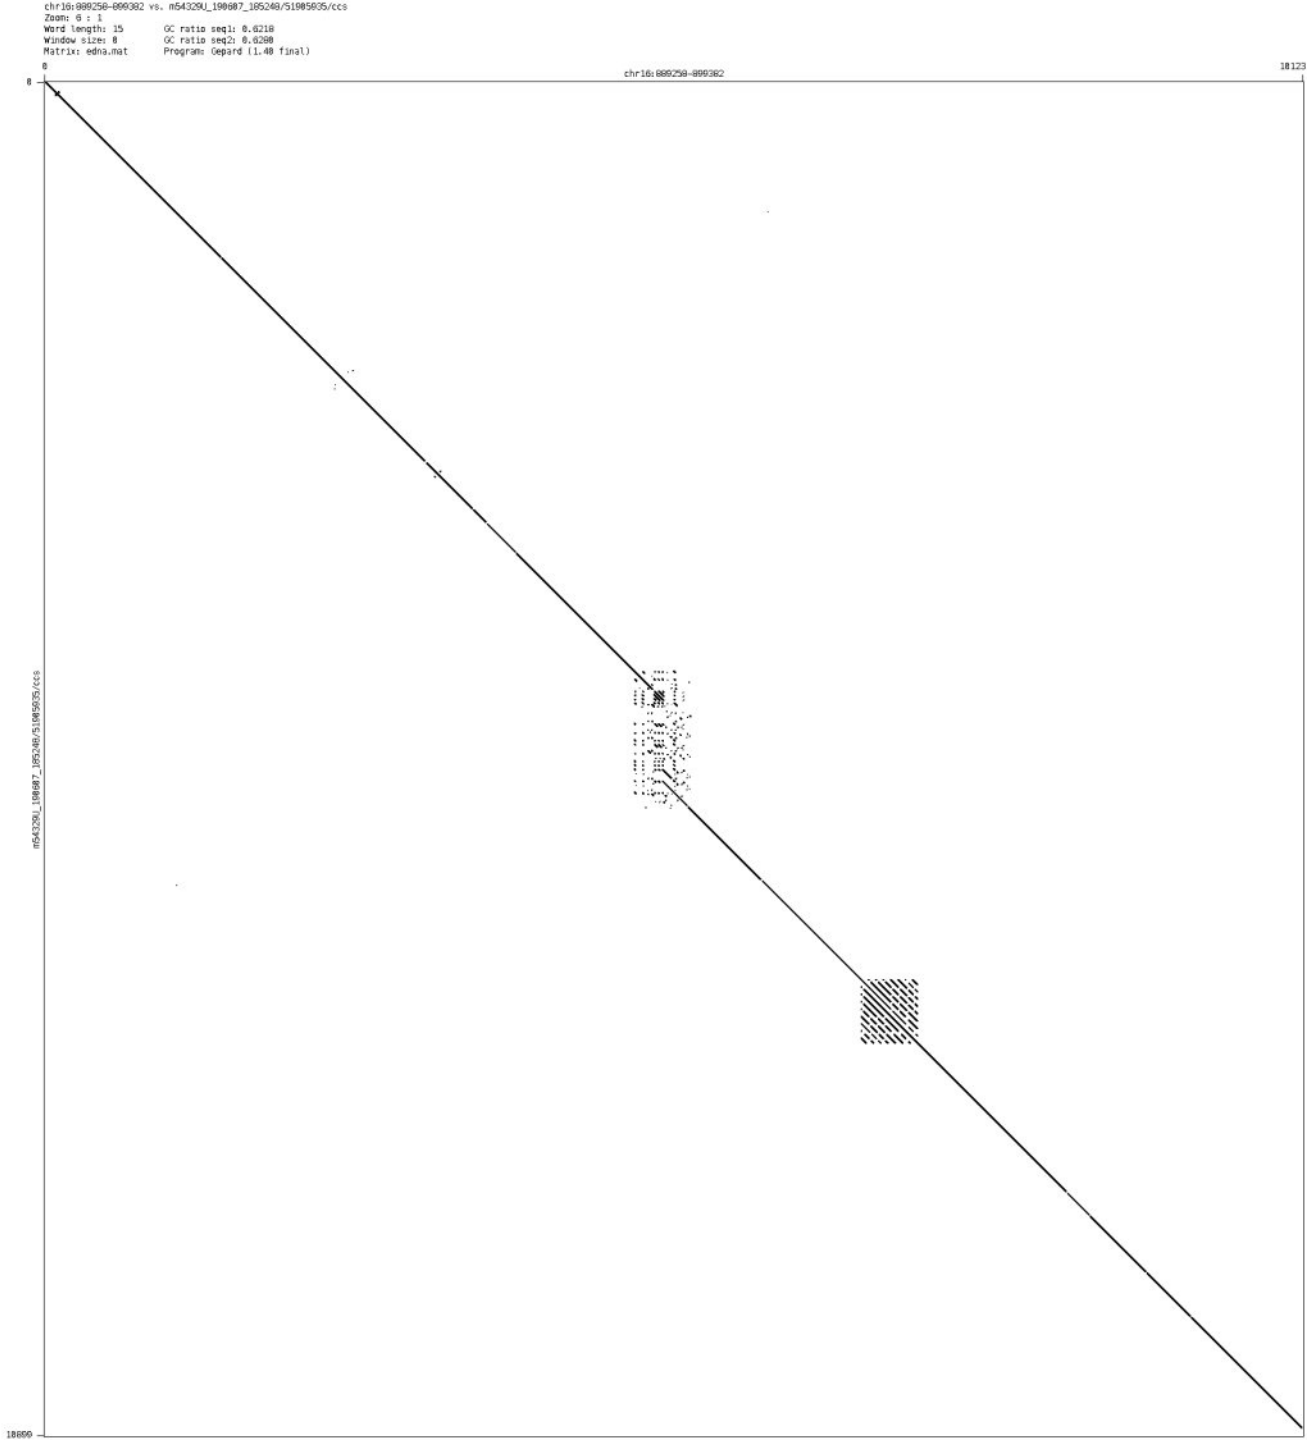

➤ chr16\_954959\_955110

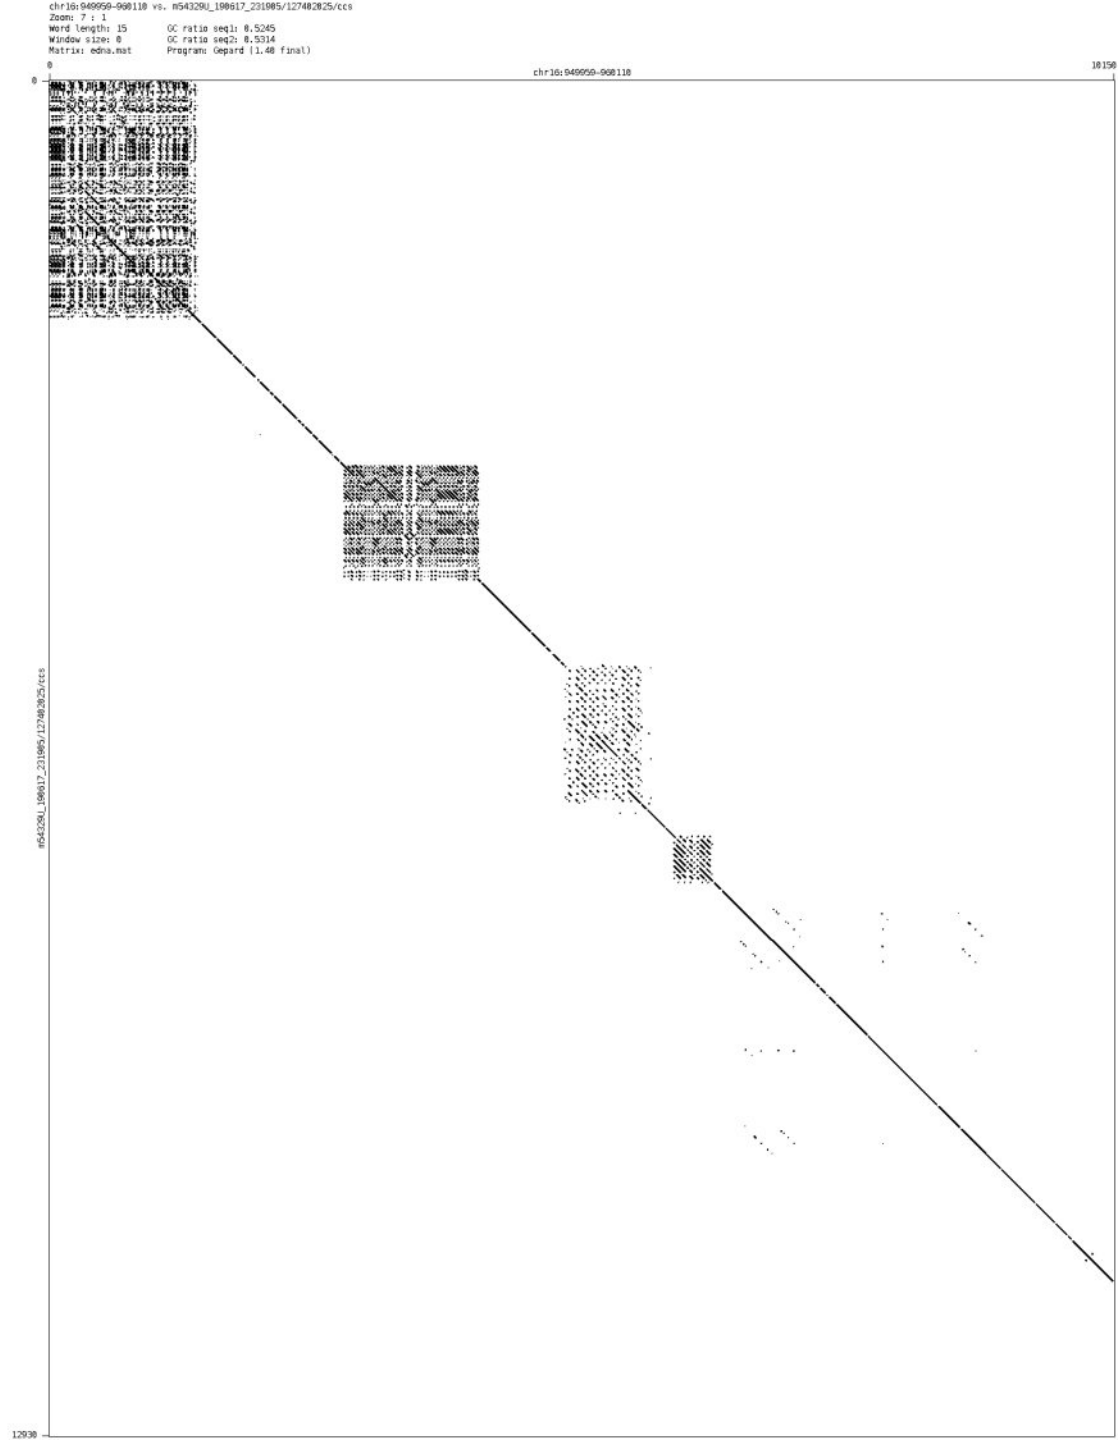



➤ chr16\_1025314\_1025497

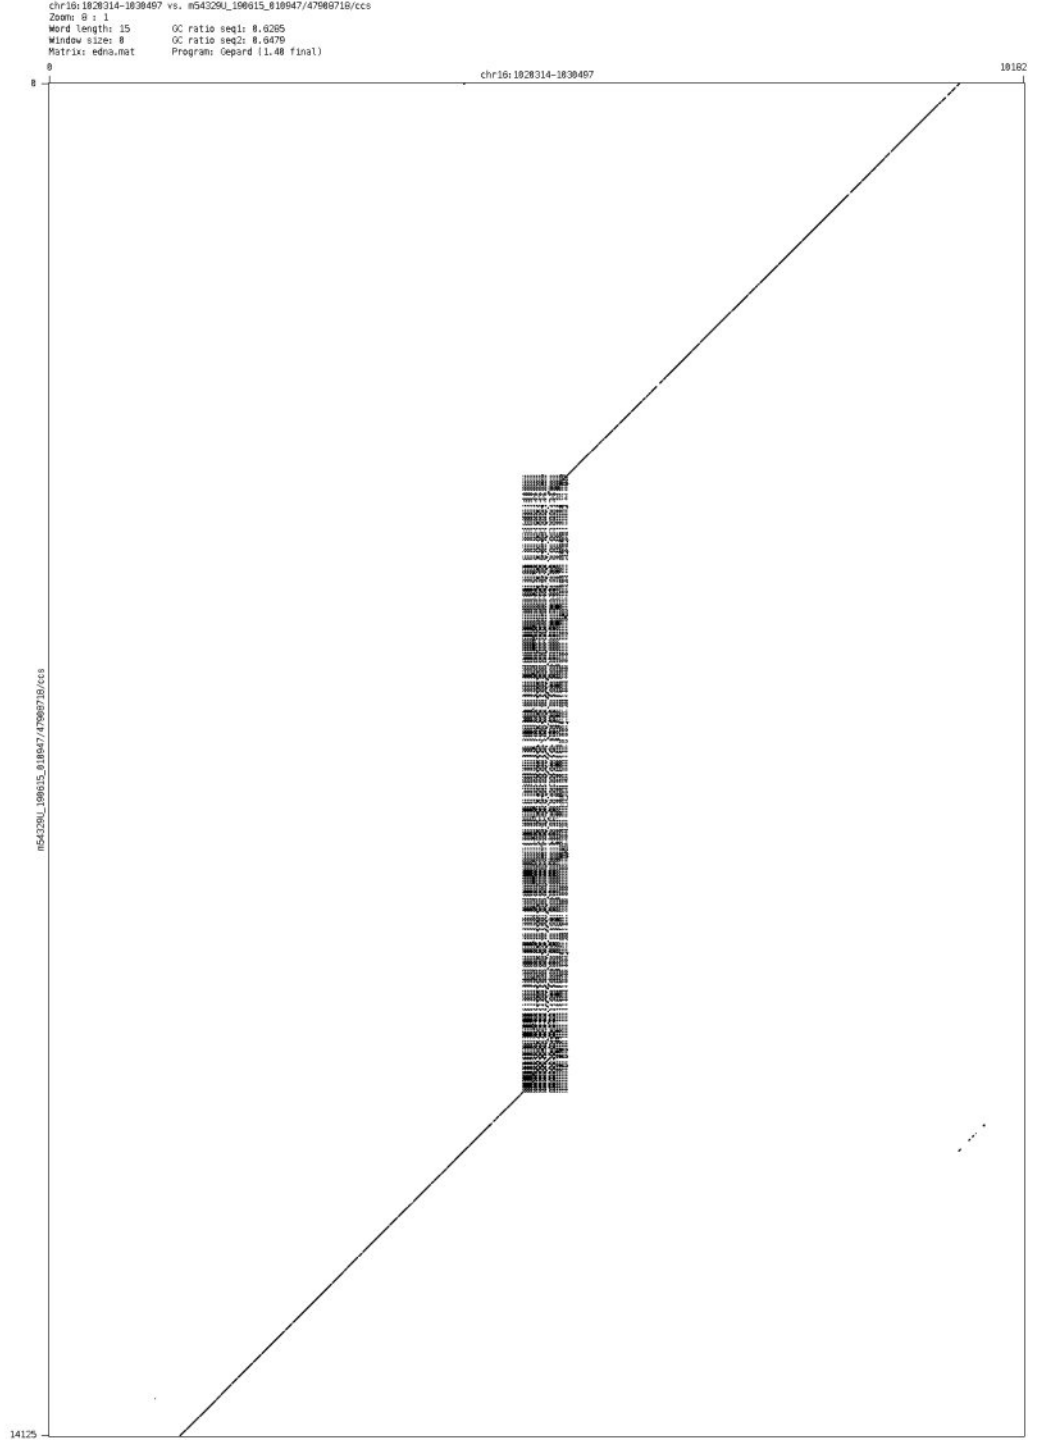

➤ chr16\_1185592\_1186068

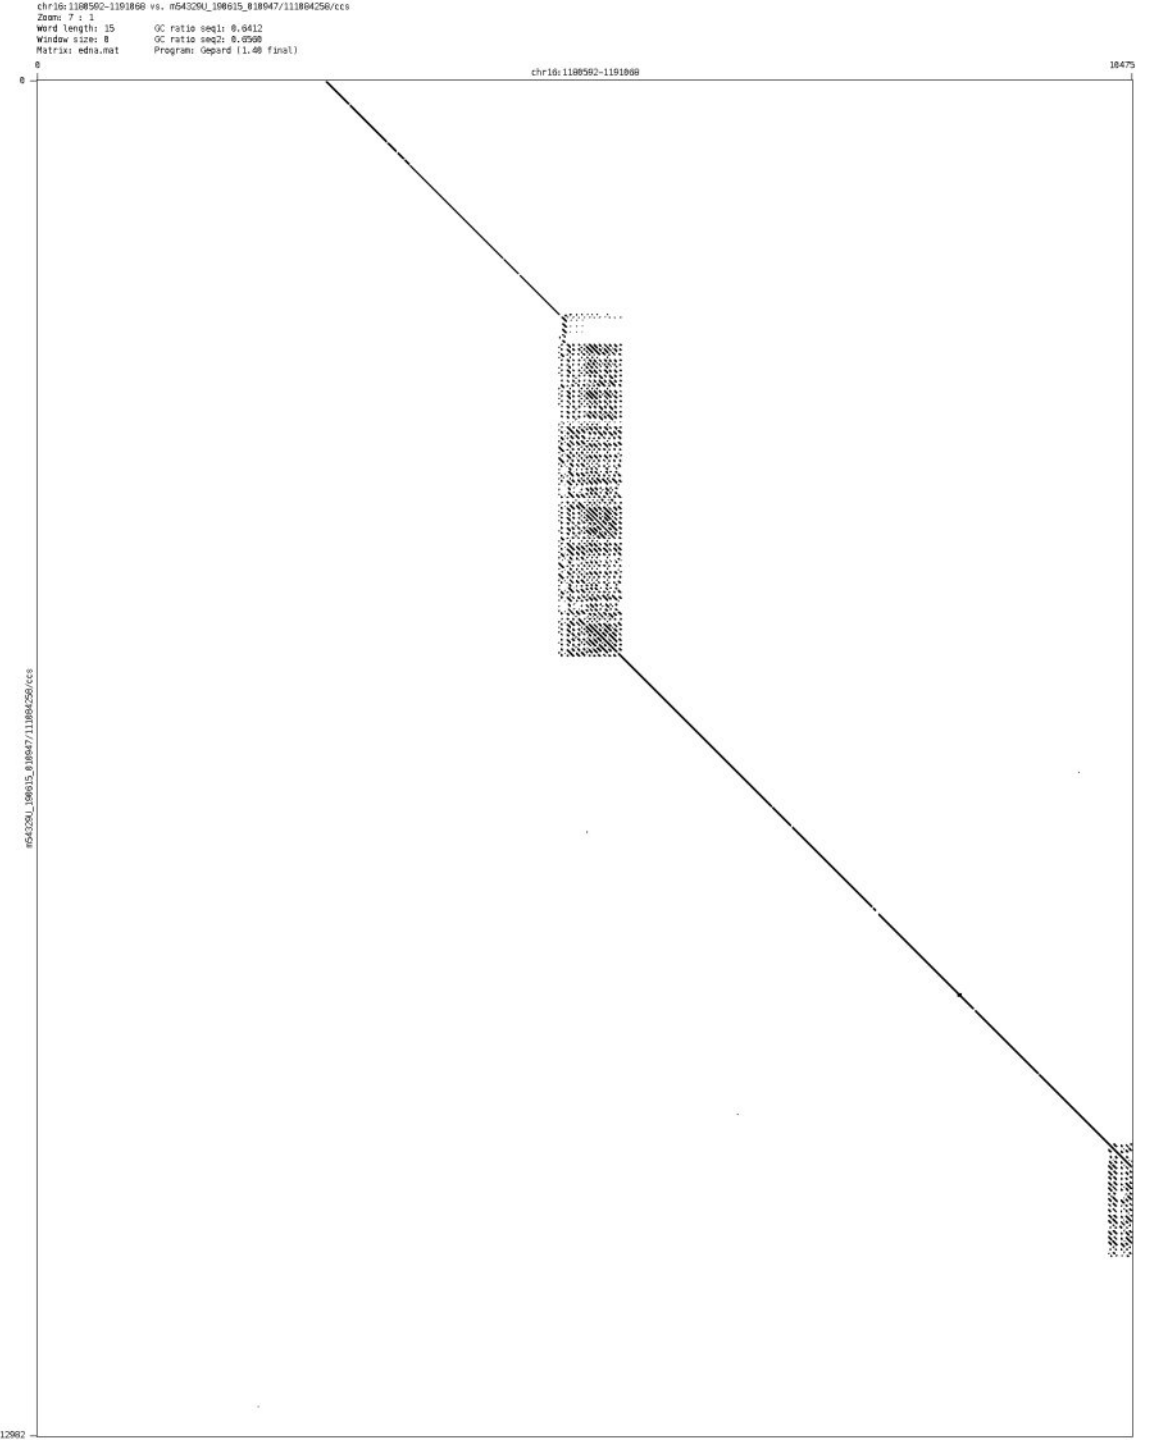

➤ chr16\_8562755\_8565066

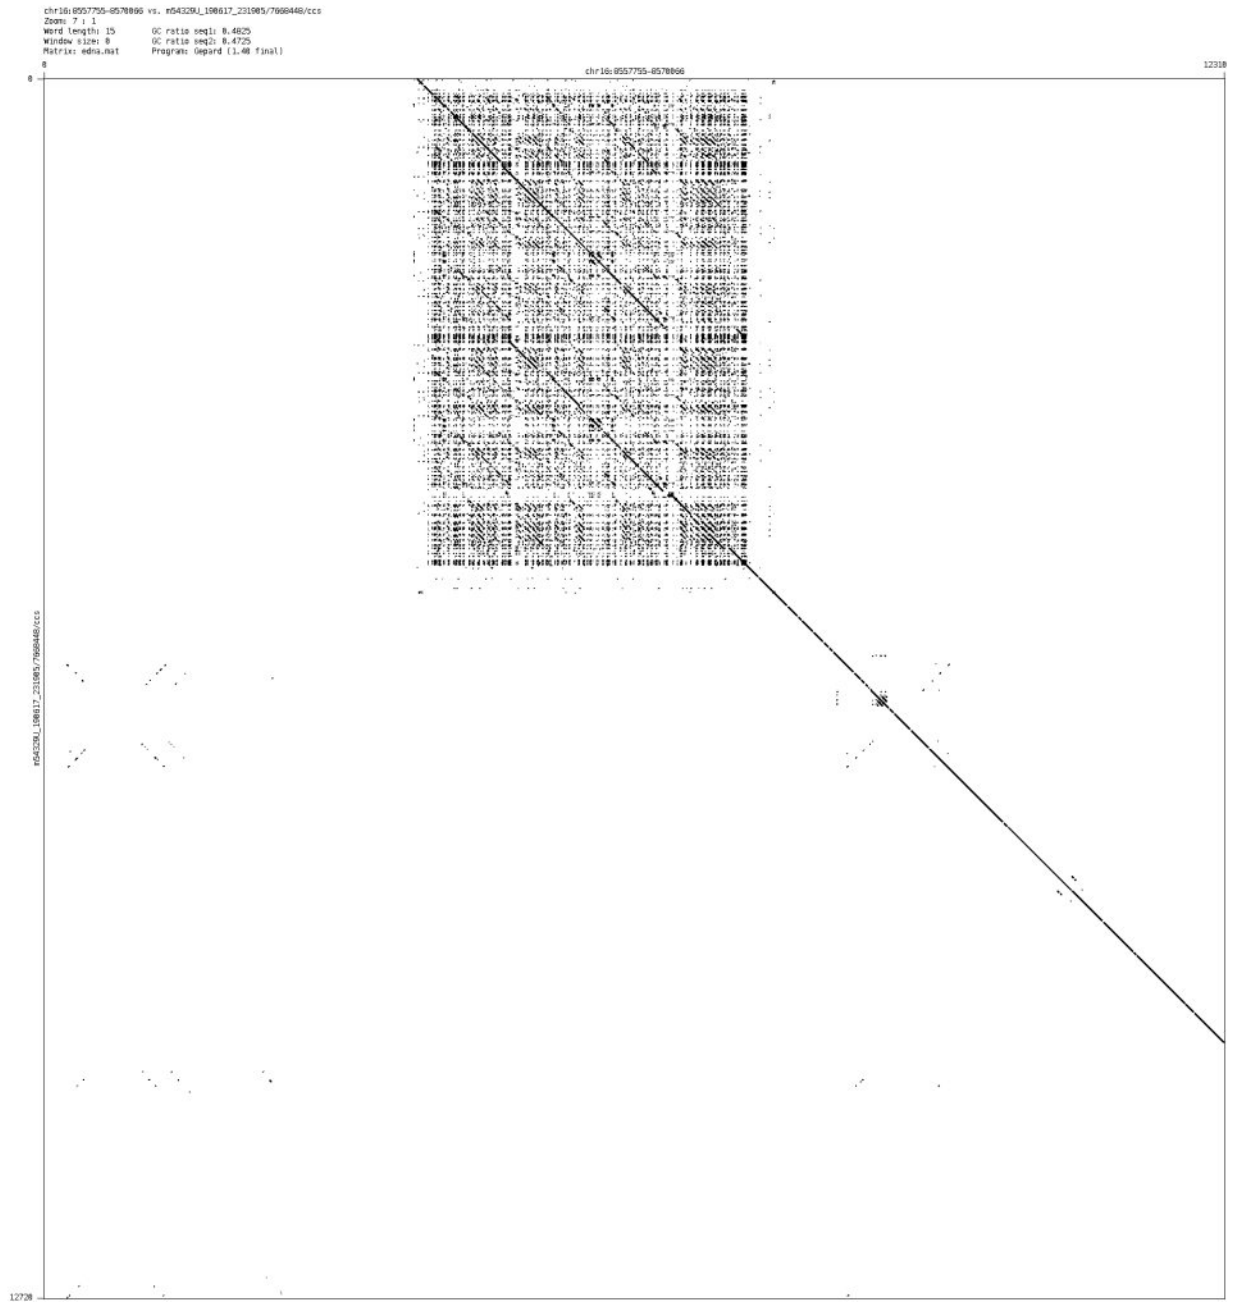

➤ chr16\_10040023\_10040092

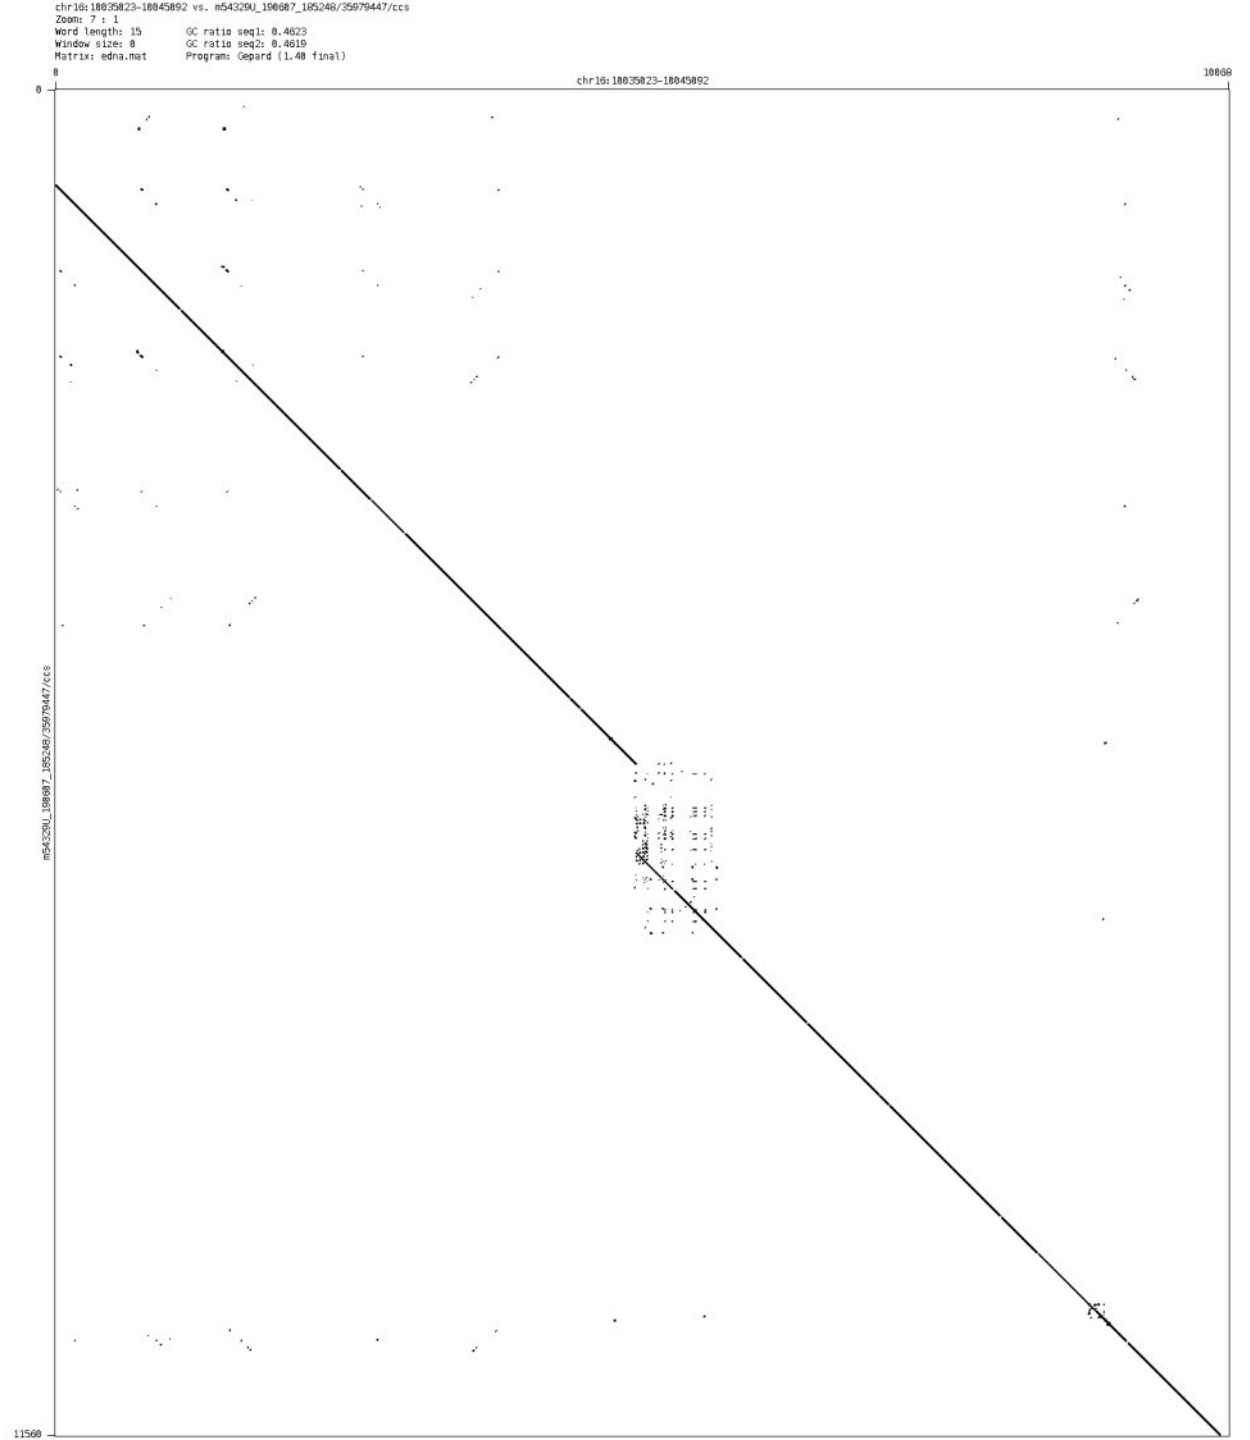

➤ chr16\_23981983\_23982098

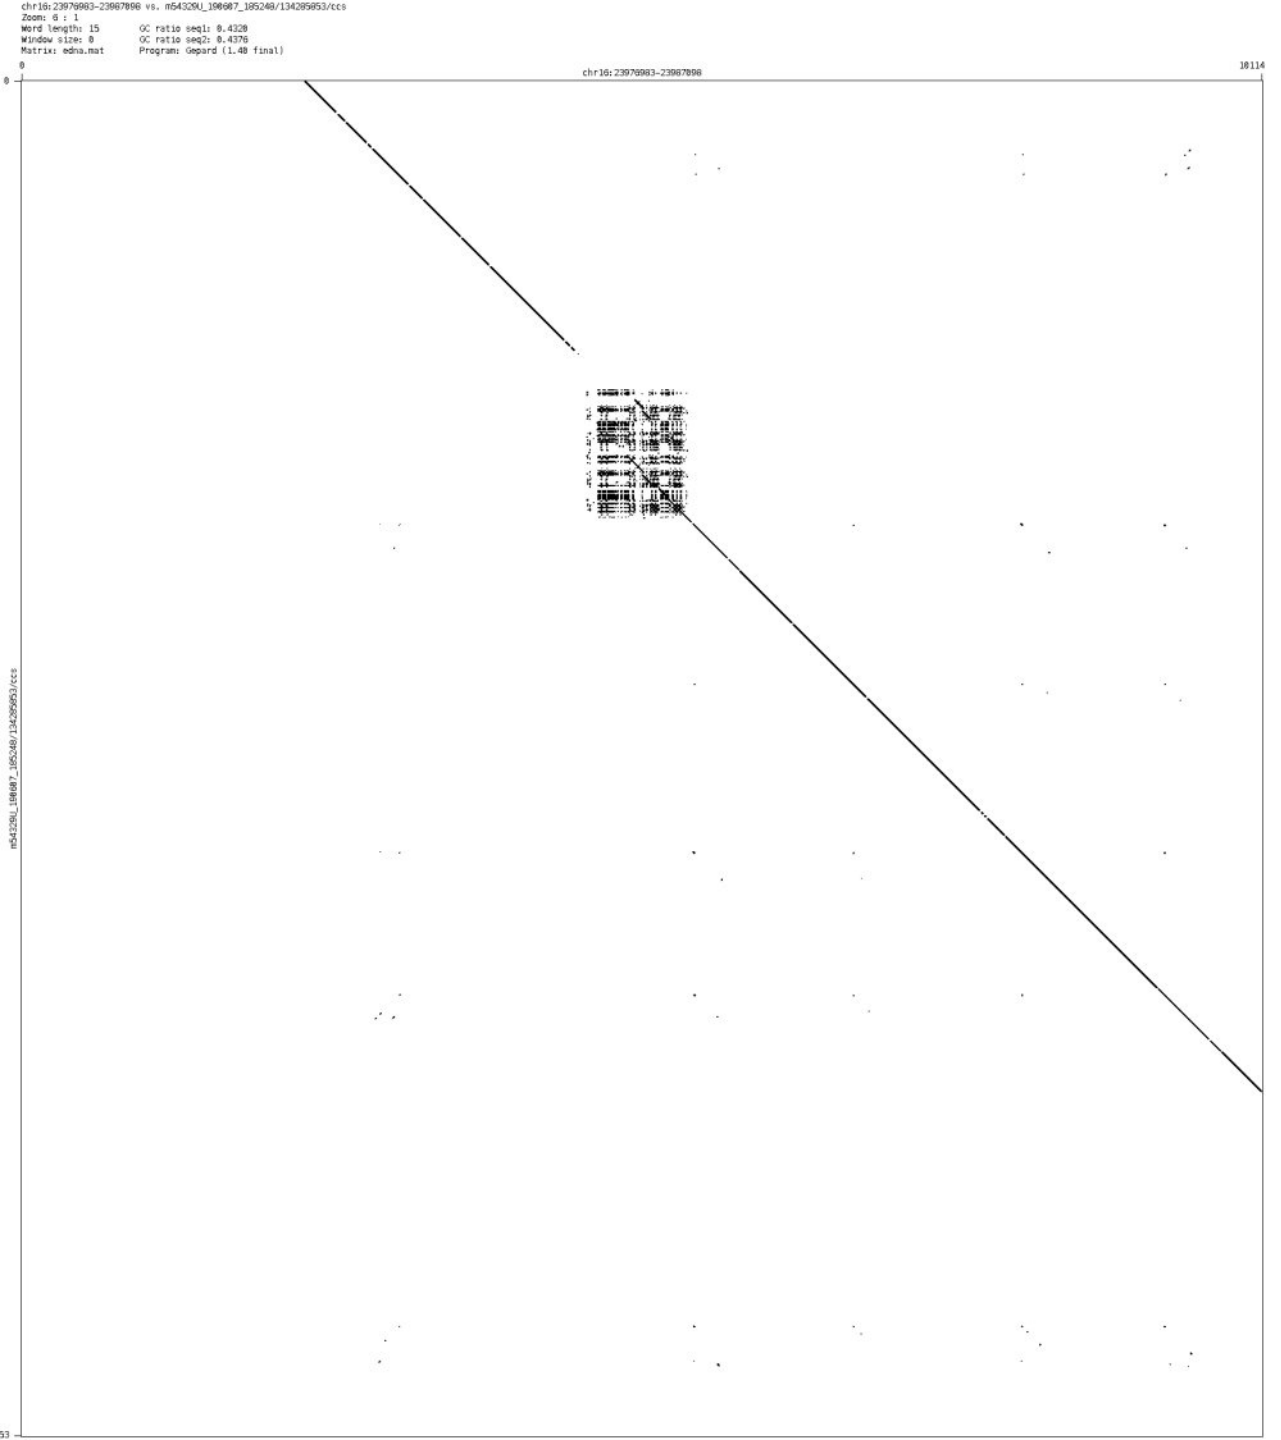

➤ chr16\_27139102\_27139213

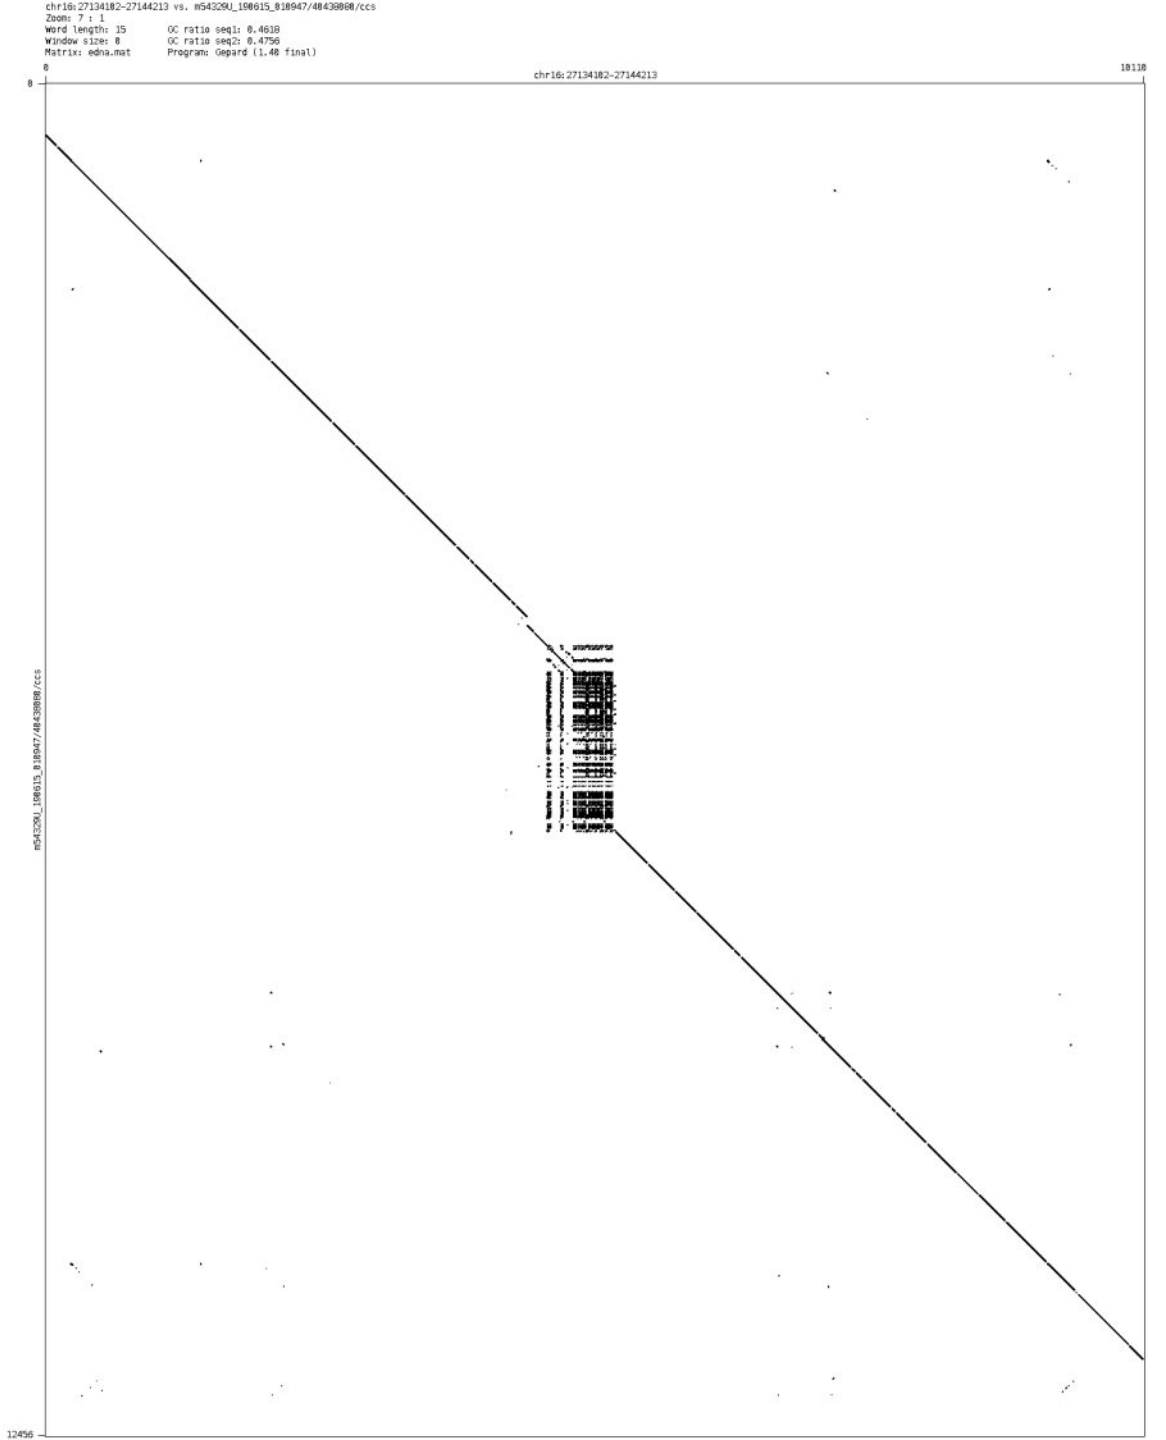

➤ chr16\_48871190\_48872586

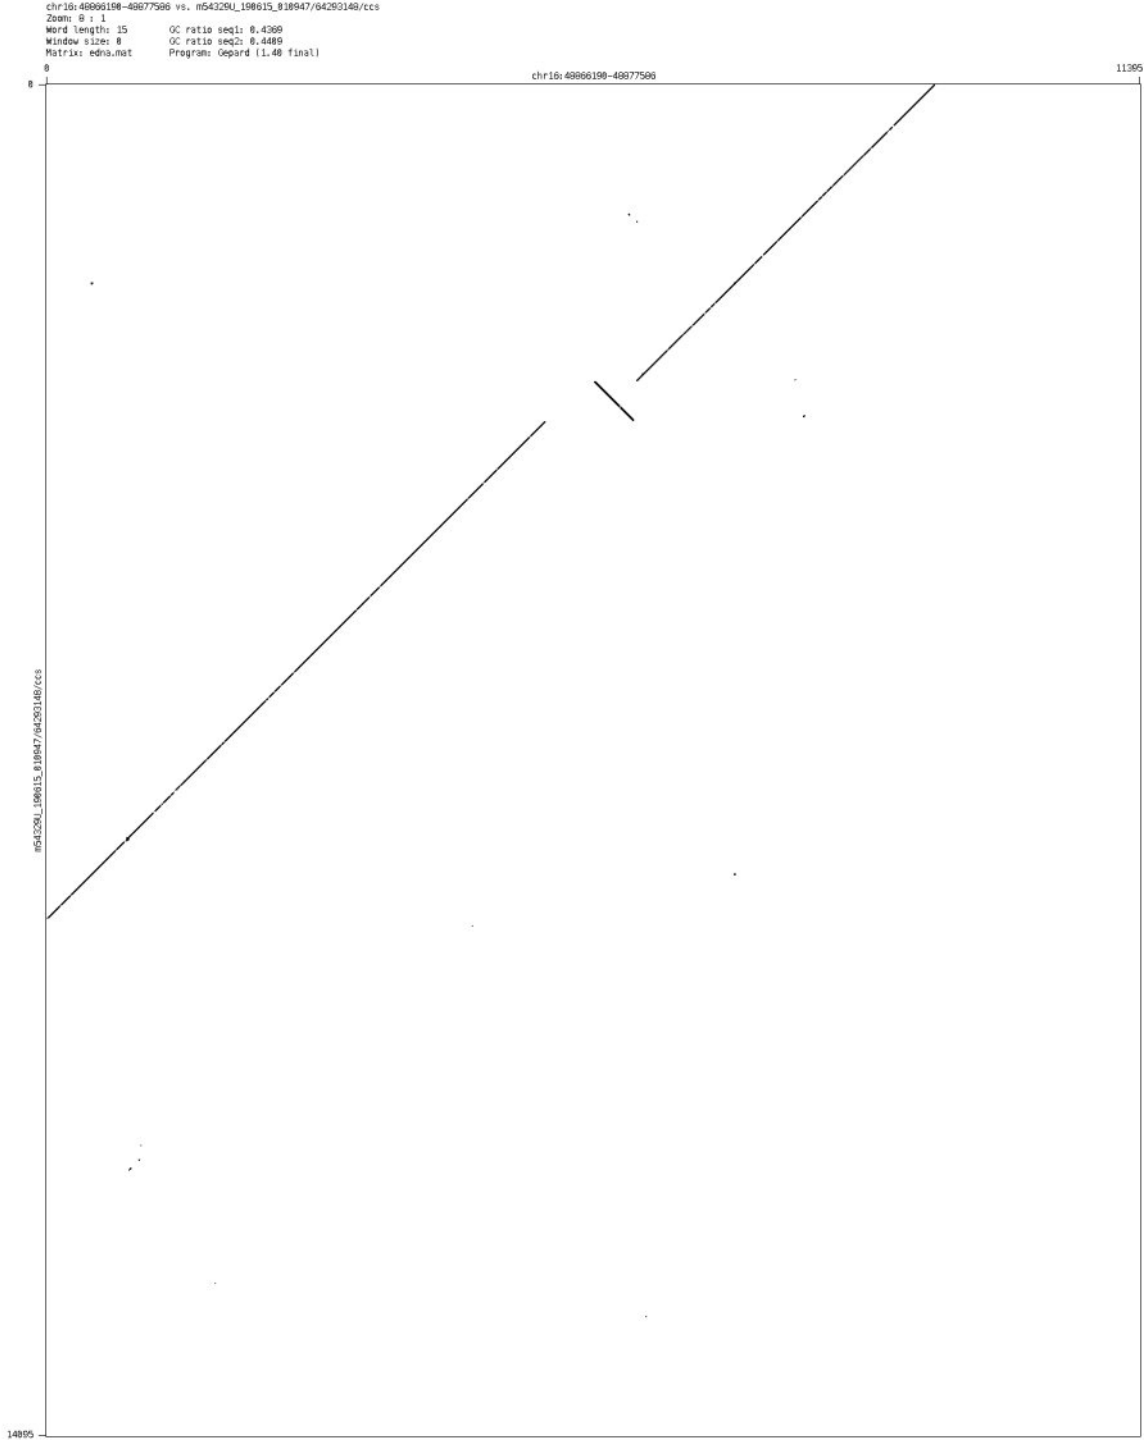

➤ chr16\_69727976\_69729327

chr16:69722976-69734327 vs. m54328U\_196615\_010847/111345686/ccs  
Zoom: 8 : 1  
Word length: 15 GC ratio seq1: 0.4650  
Window size: 8 GC ratio seq2: 0.4816  
Matrix: edna.mat Program: Gepard (1.40 final)

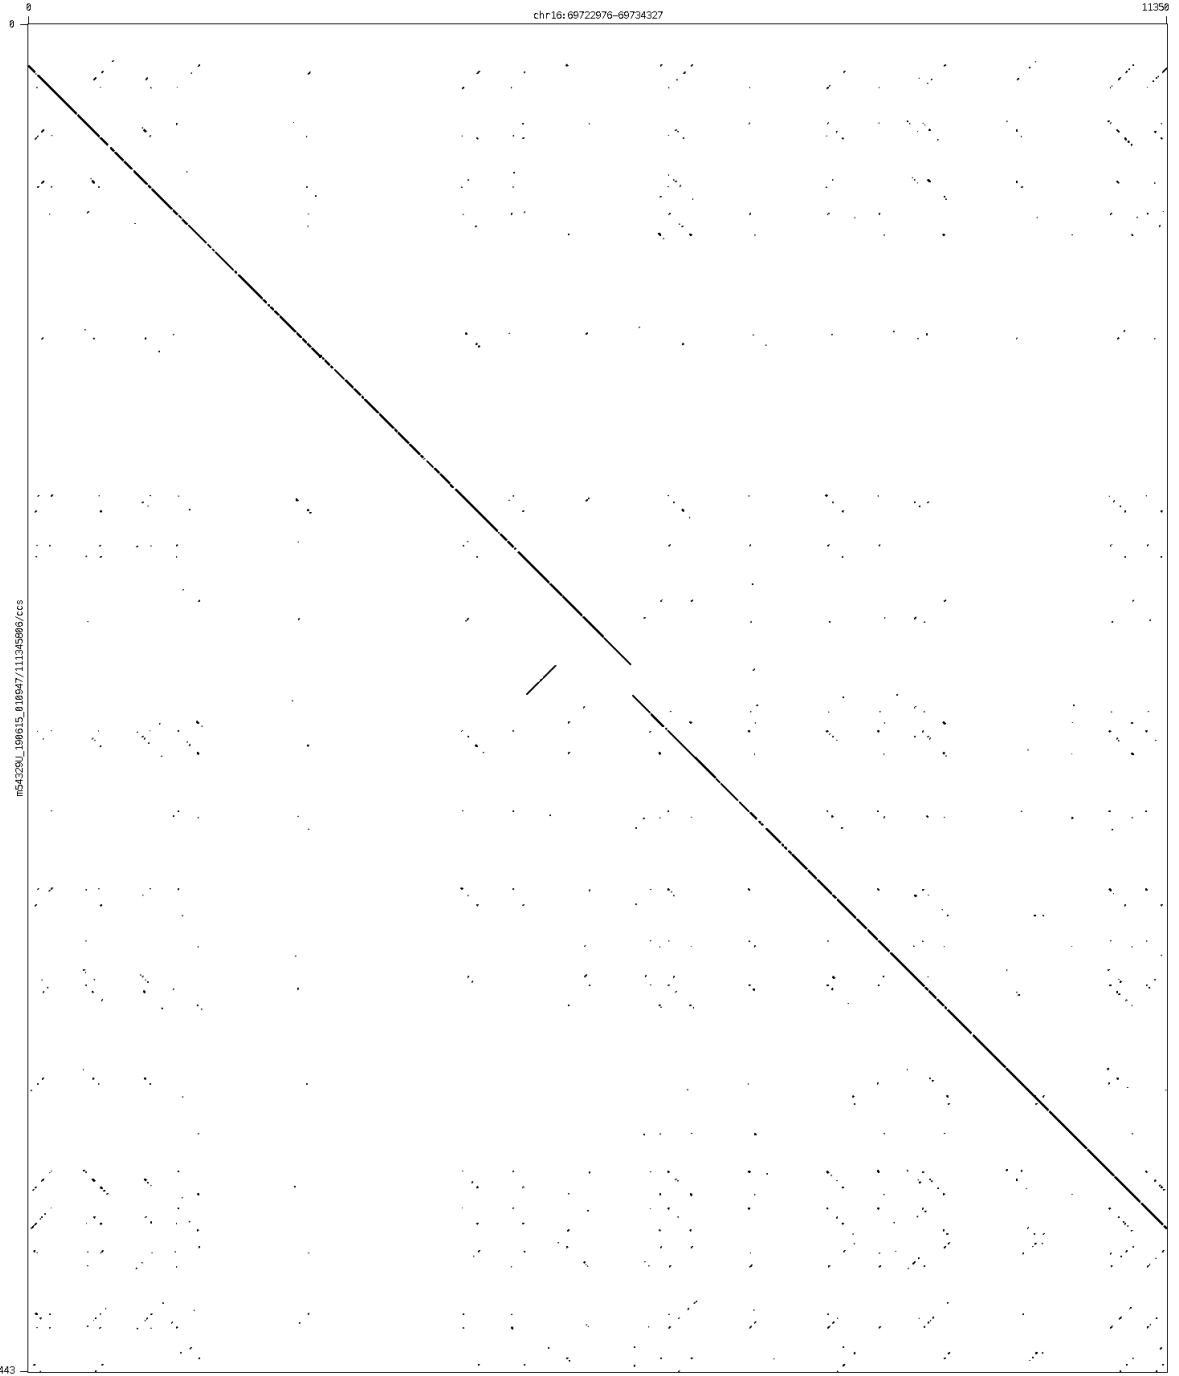



➤ chr16\_78004459\_78007456

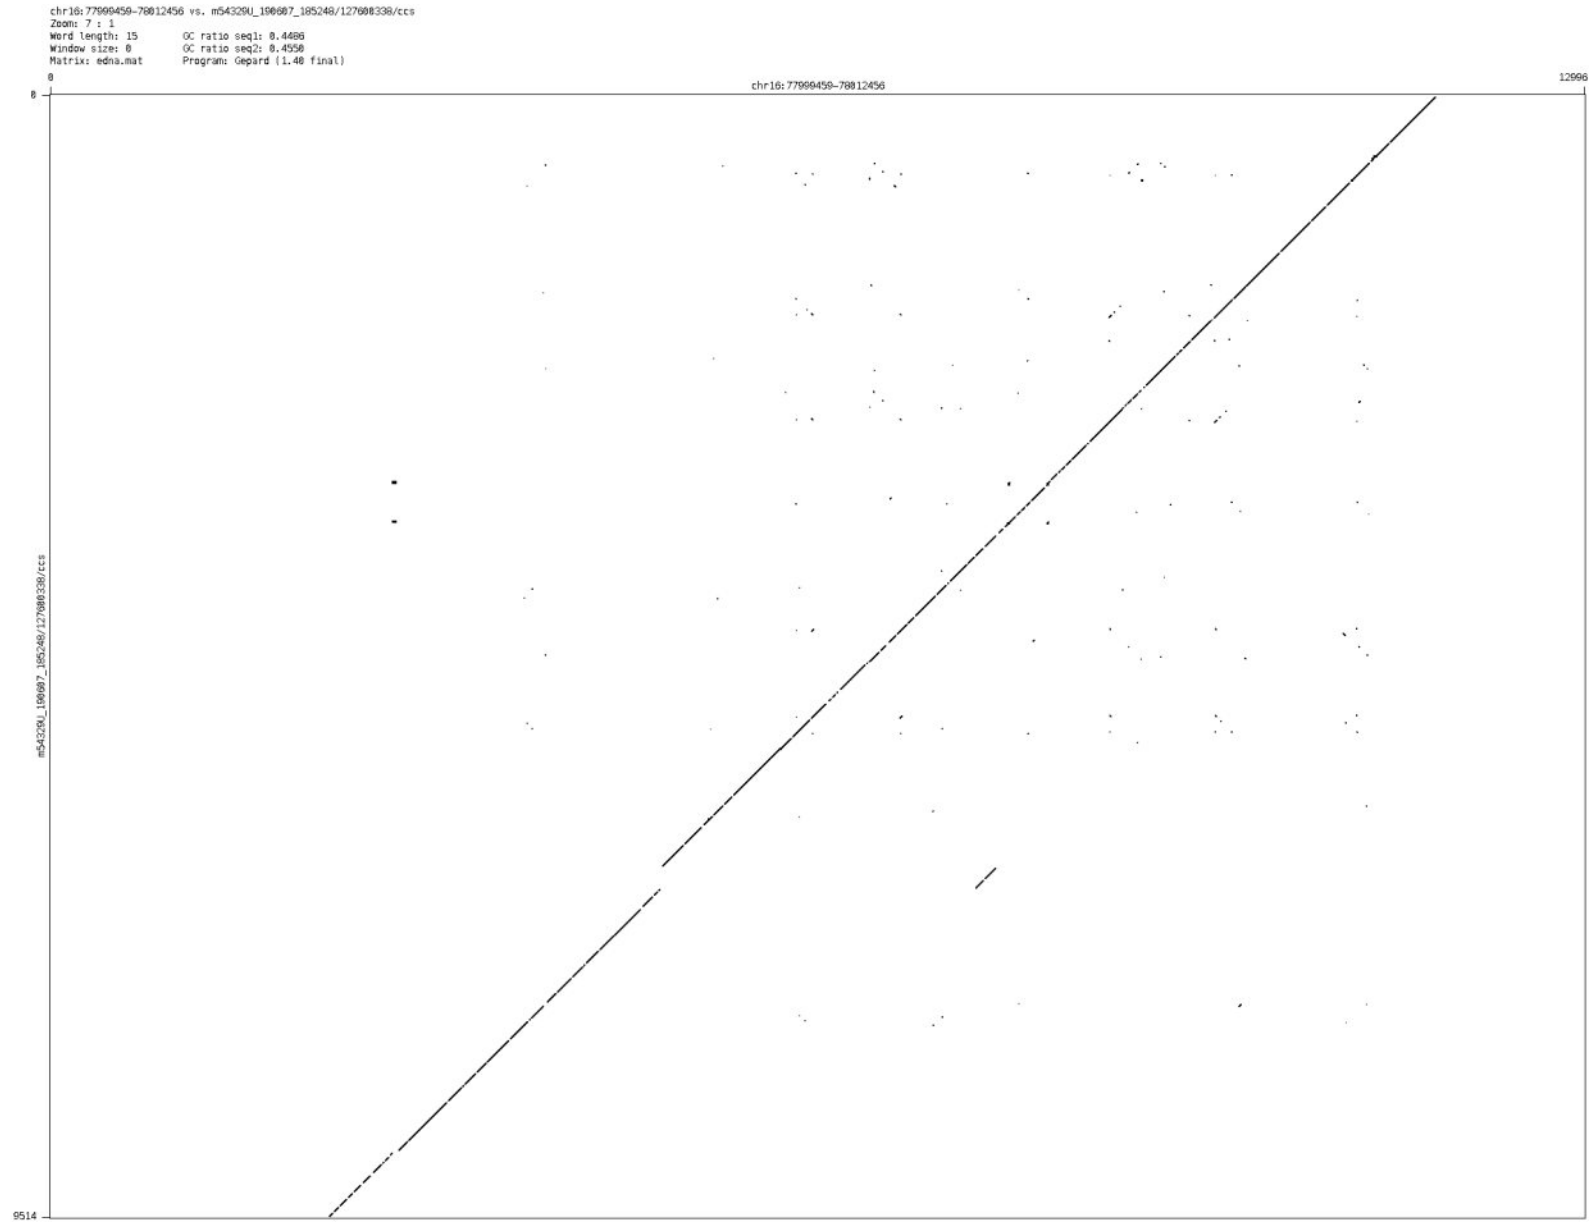

➤ chr16\_83950511\_83950871

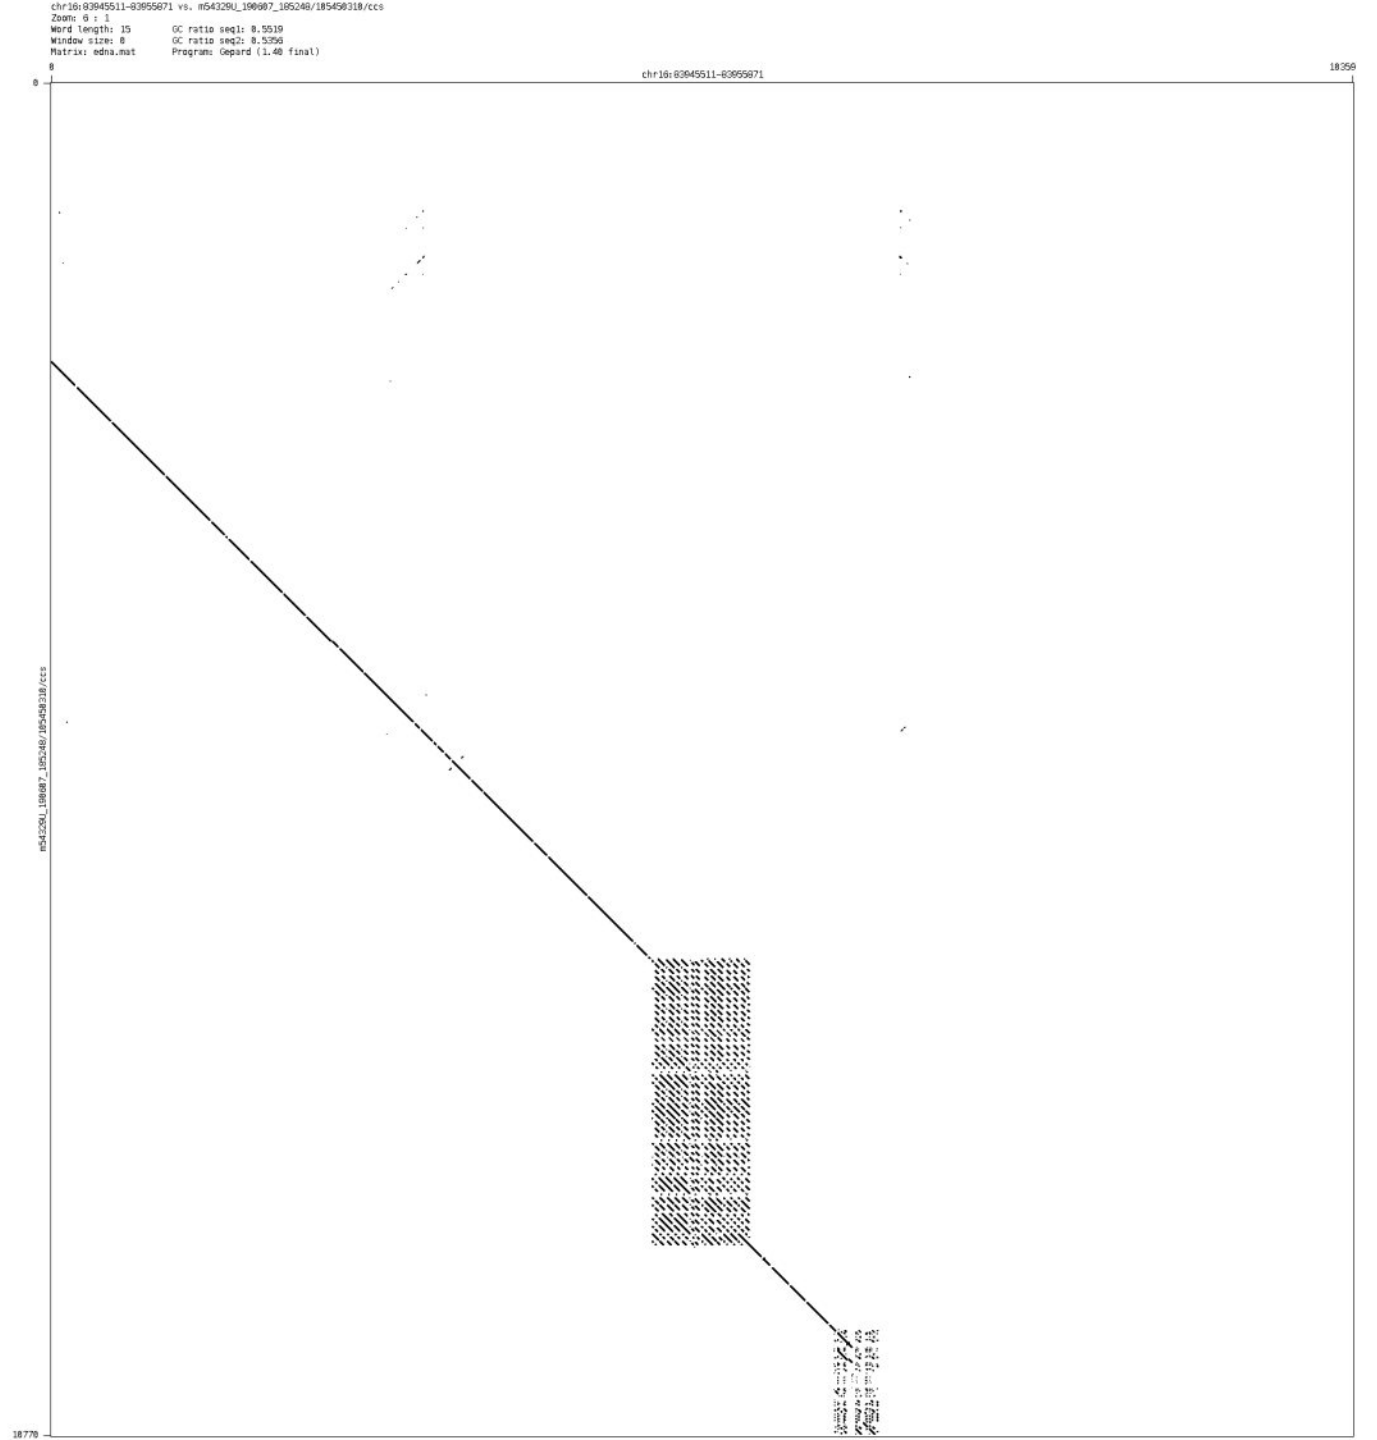

➤ chr16\_84050534\_84051508

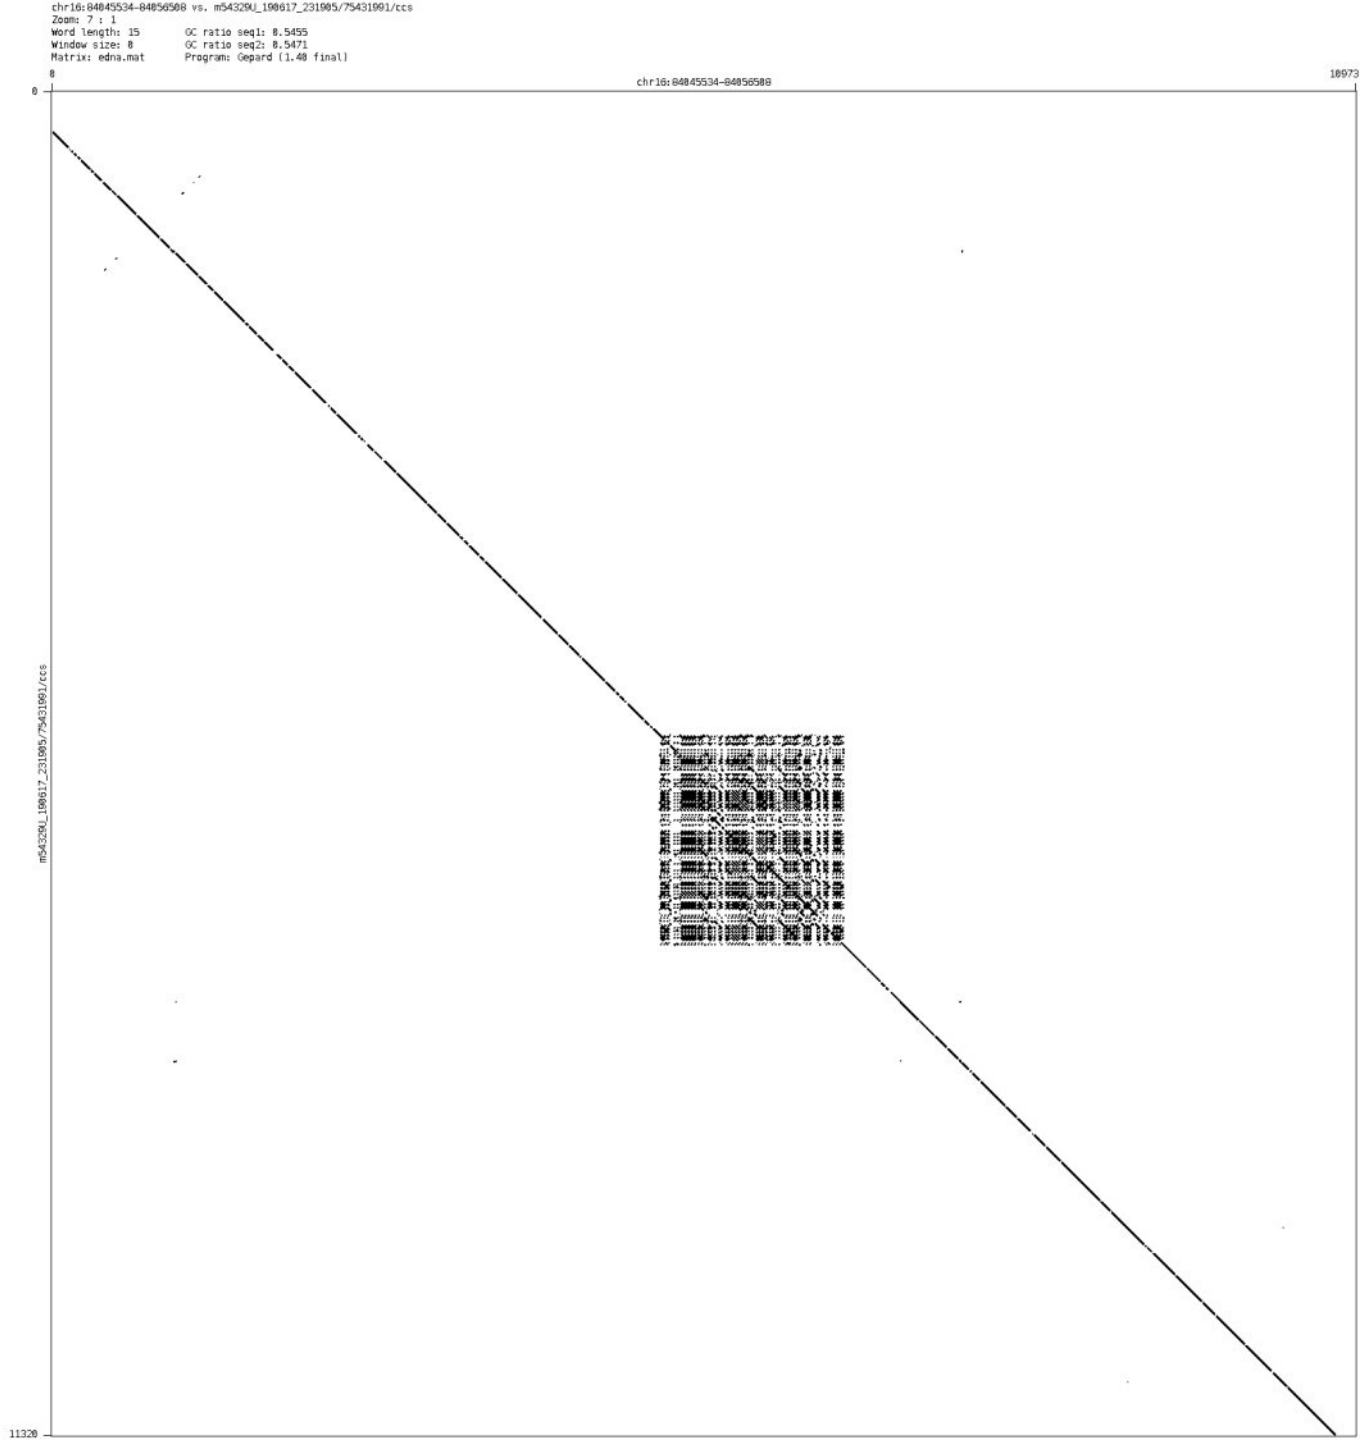

➤ chr16\_86464399\_86464597

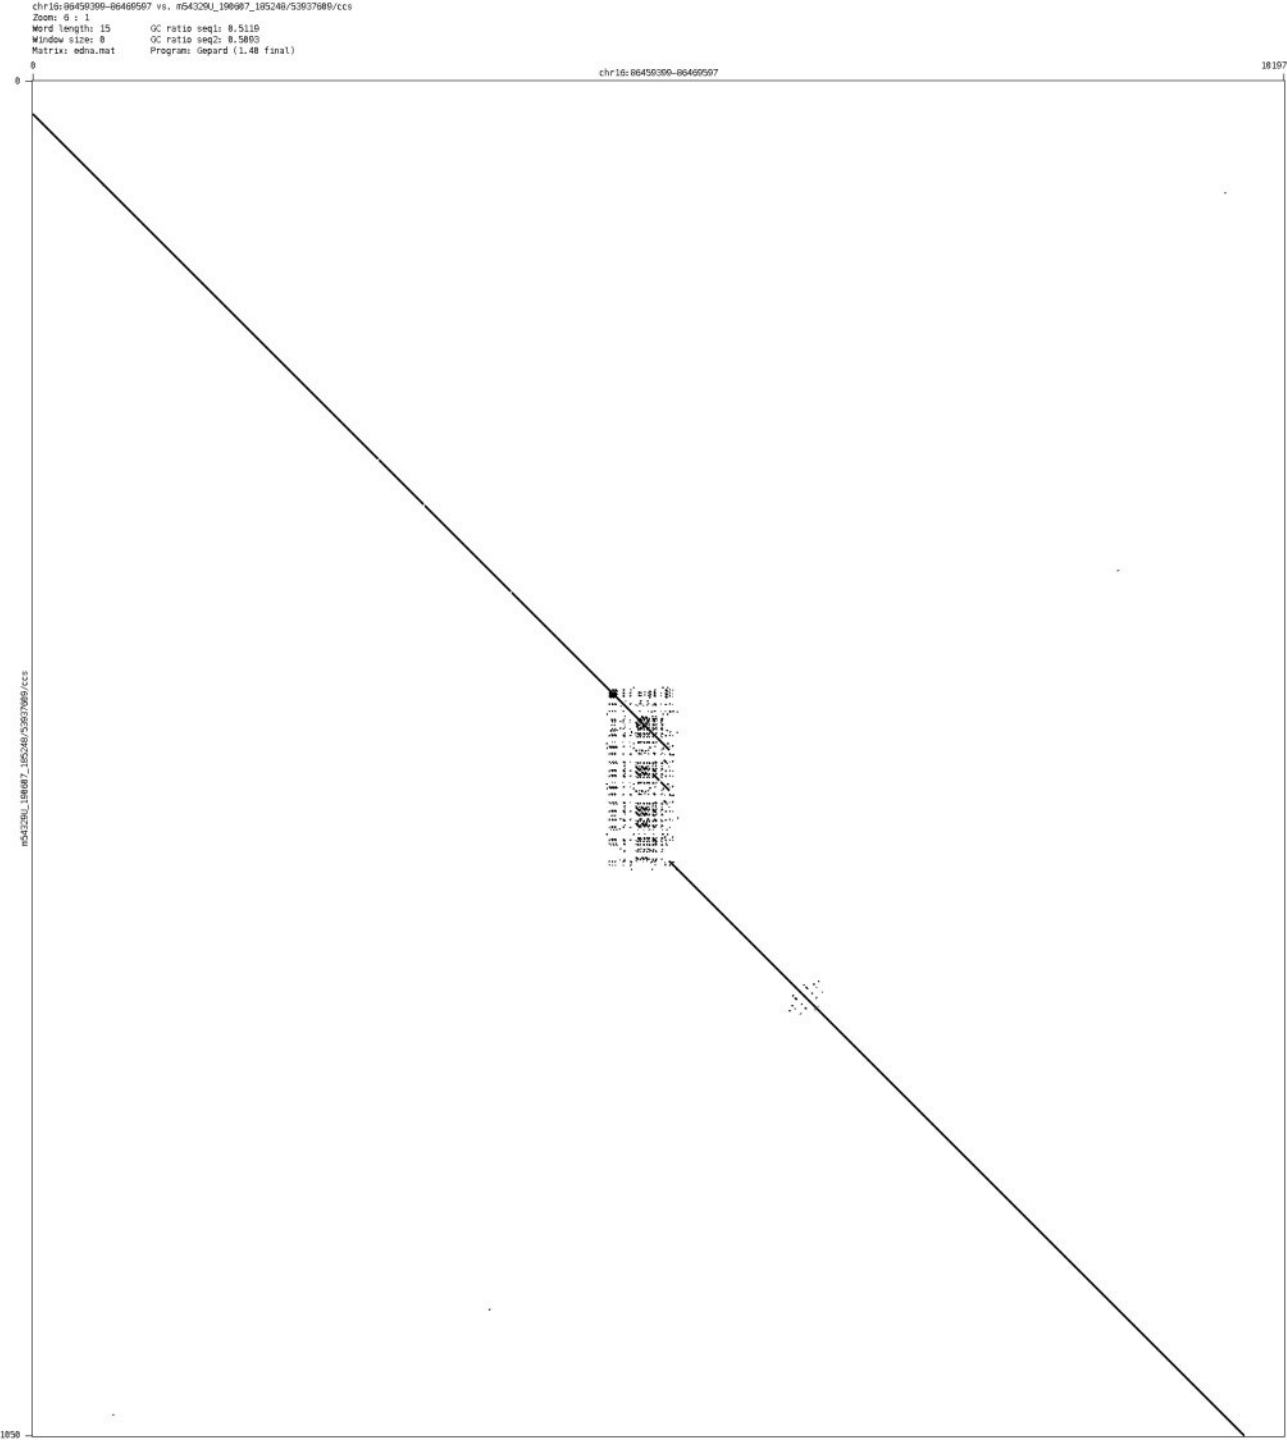

➤ chr16\_87145221\_87145335

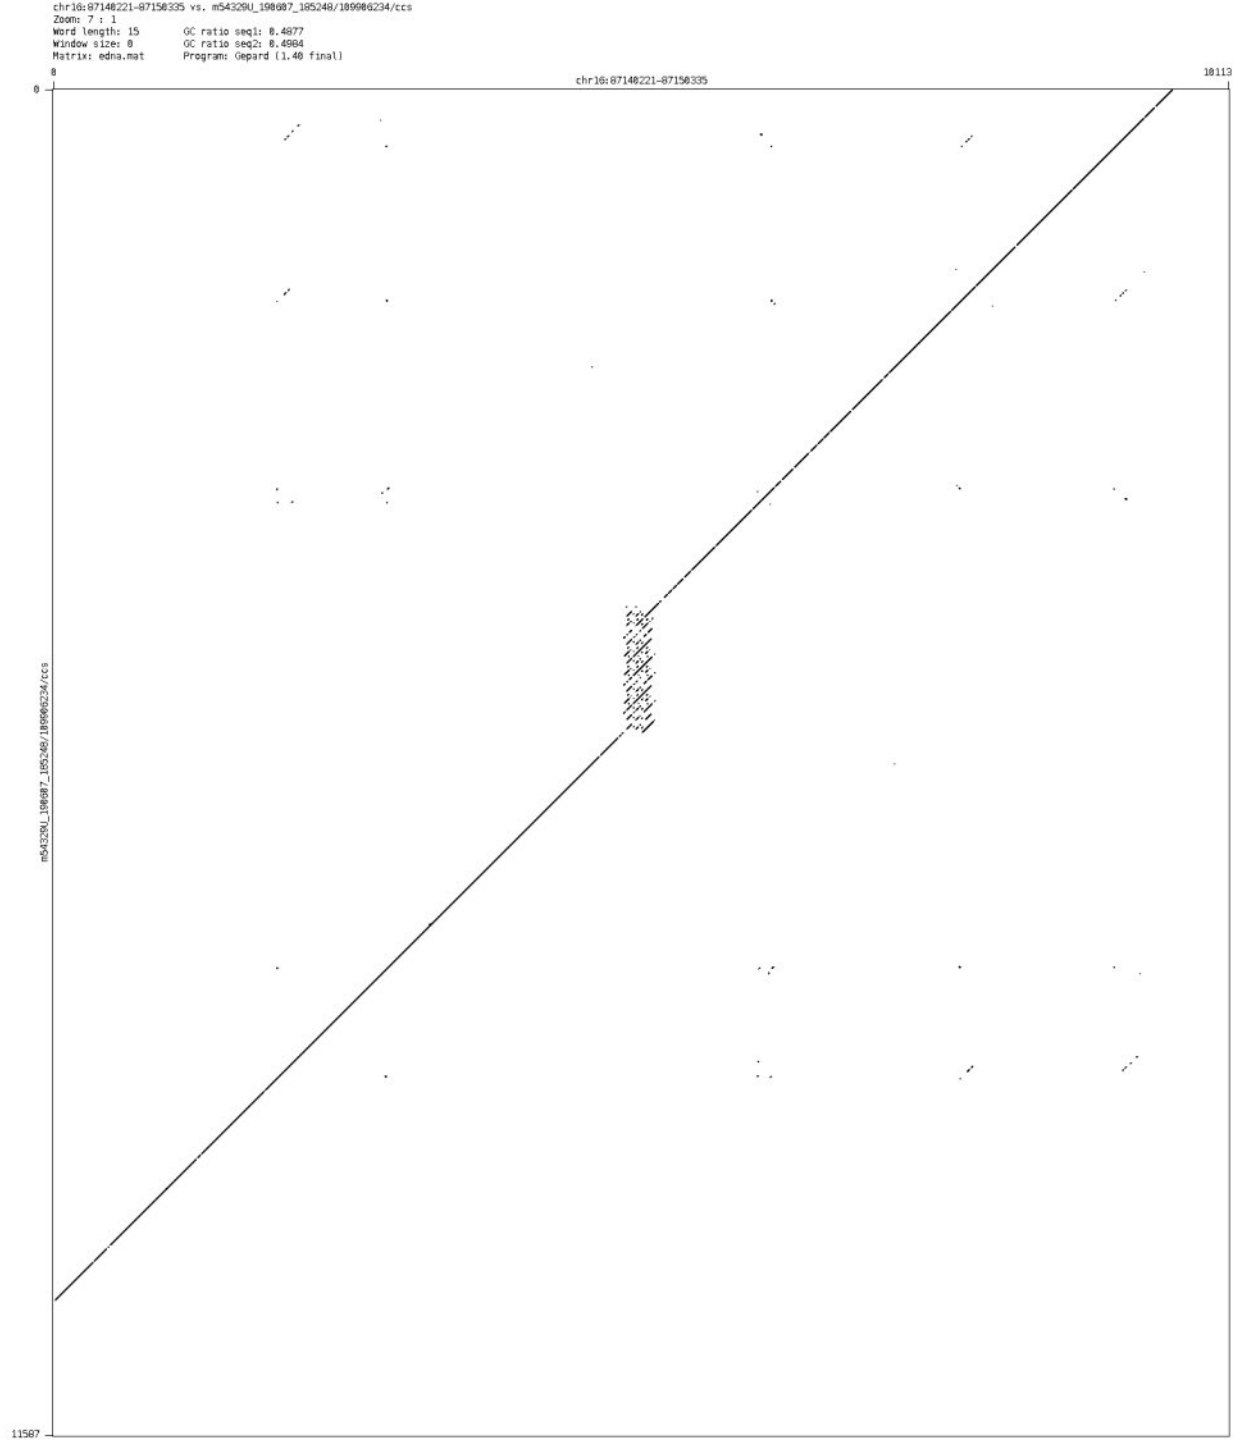

➤ chr17\_314701\_316802

chr17:309781-321982 vs. m543291\_198619\_852546/116166896/ctcs  
Zoom: 8 : 1 GC ratio seq1: 0.5571  
Word length: 15 GC ratio seq2: 0.5675  
Window size: 8  
Matrix: edna.net Program: Gepard (1.40 final)

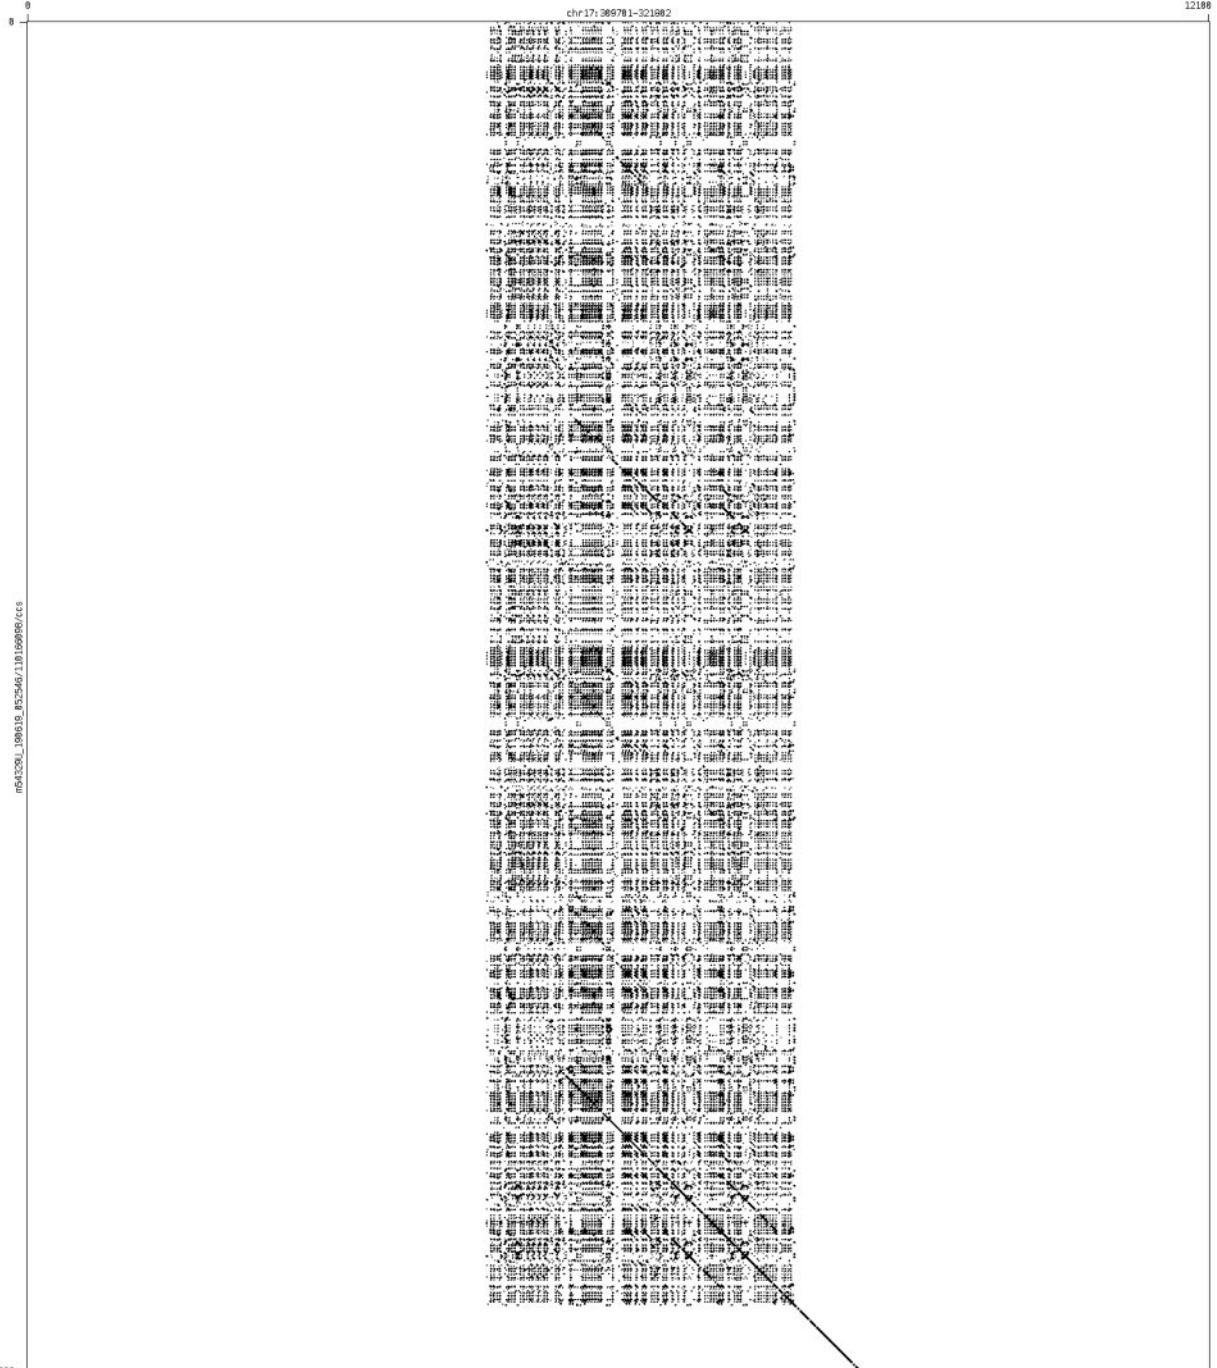

➤ chr17\_809815\_810302

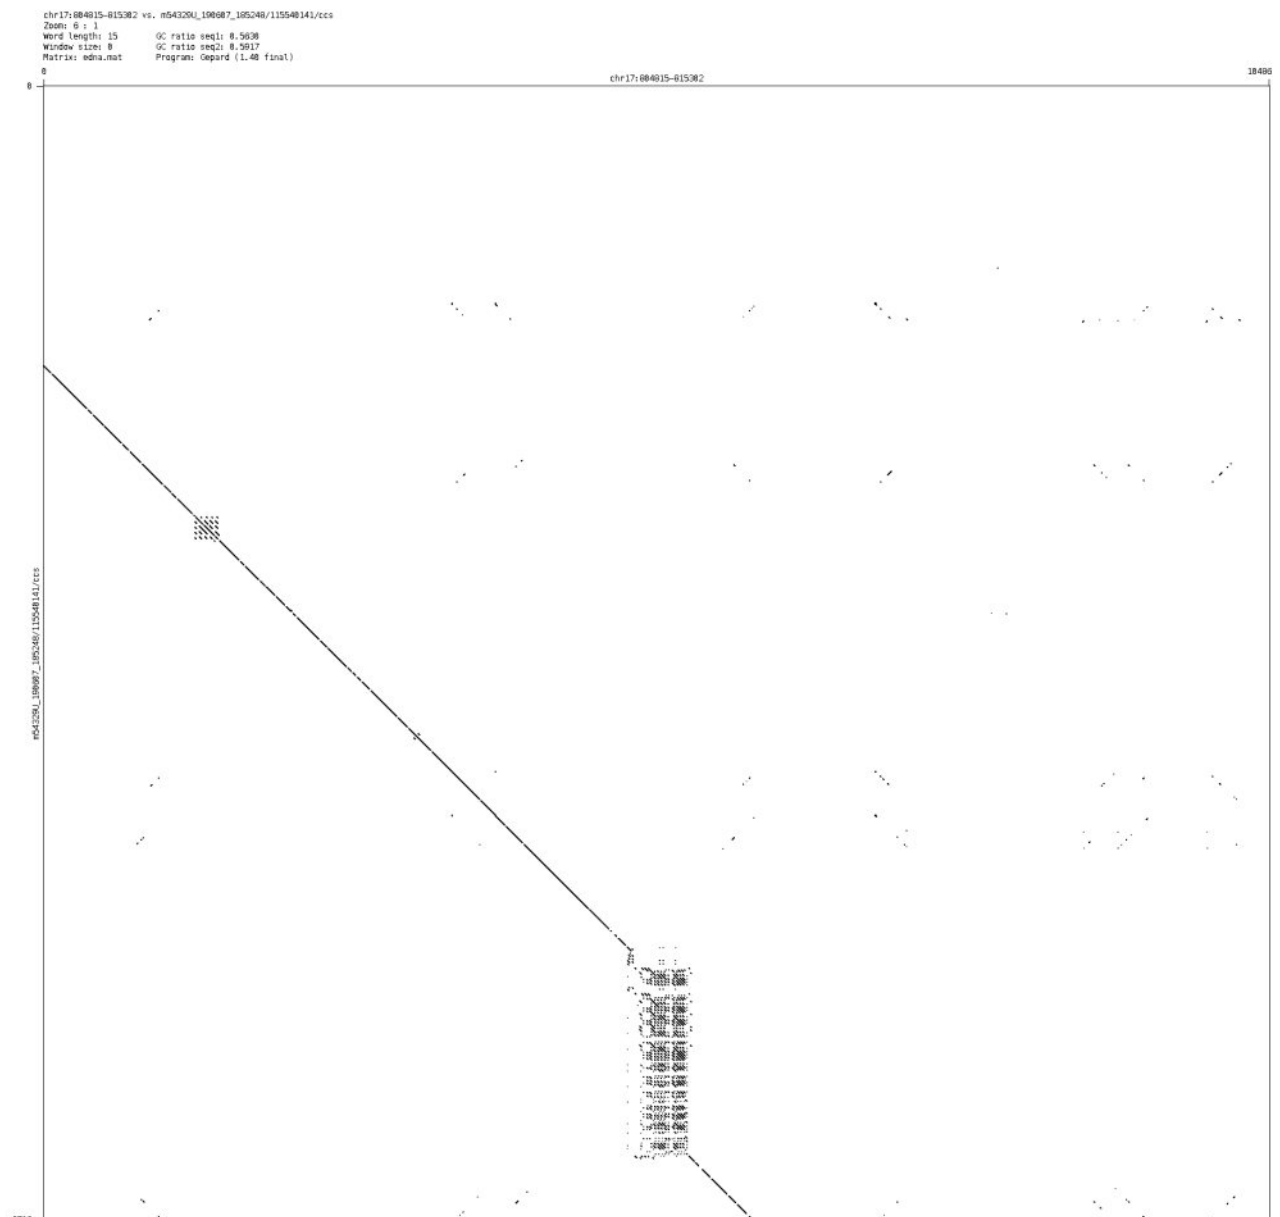

➤ chr17\_841437\_841560

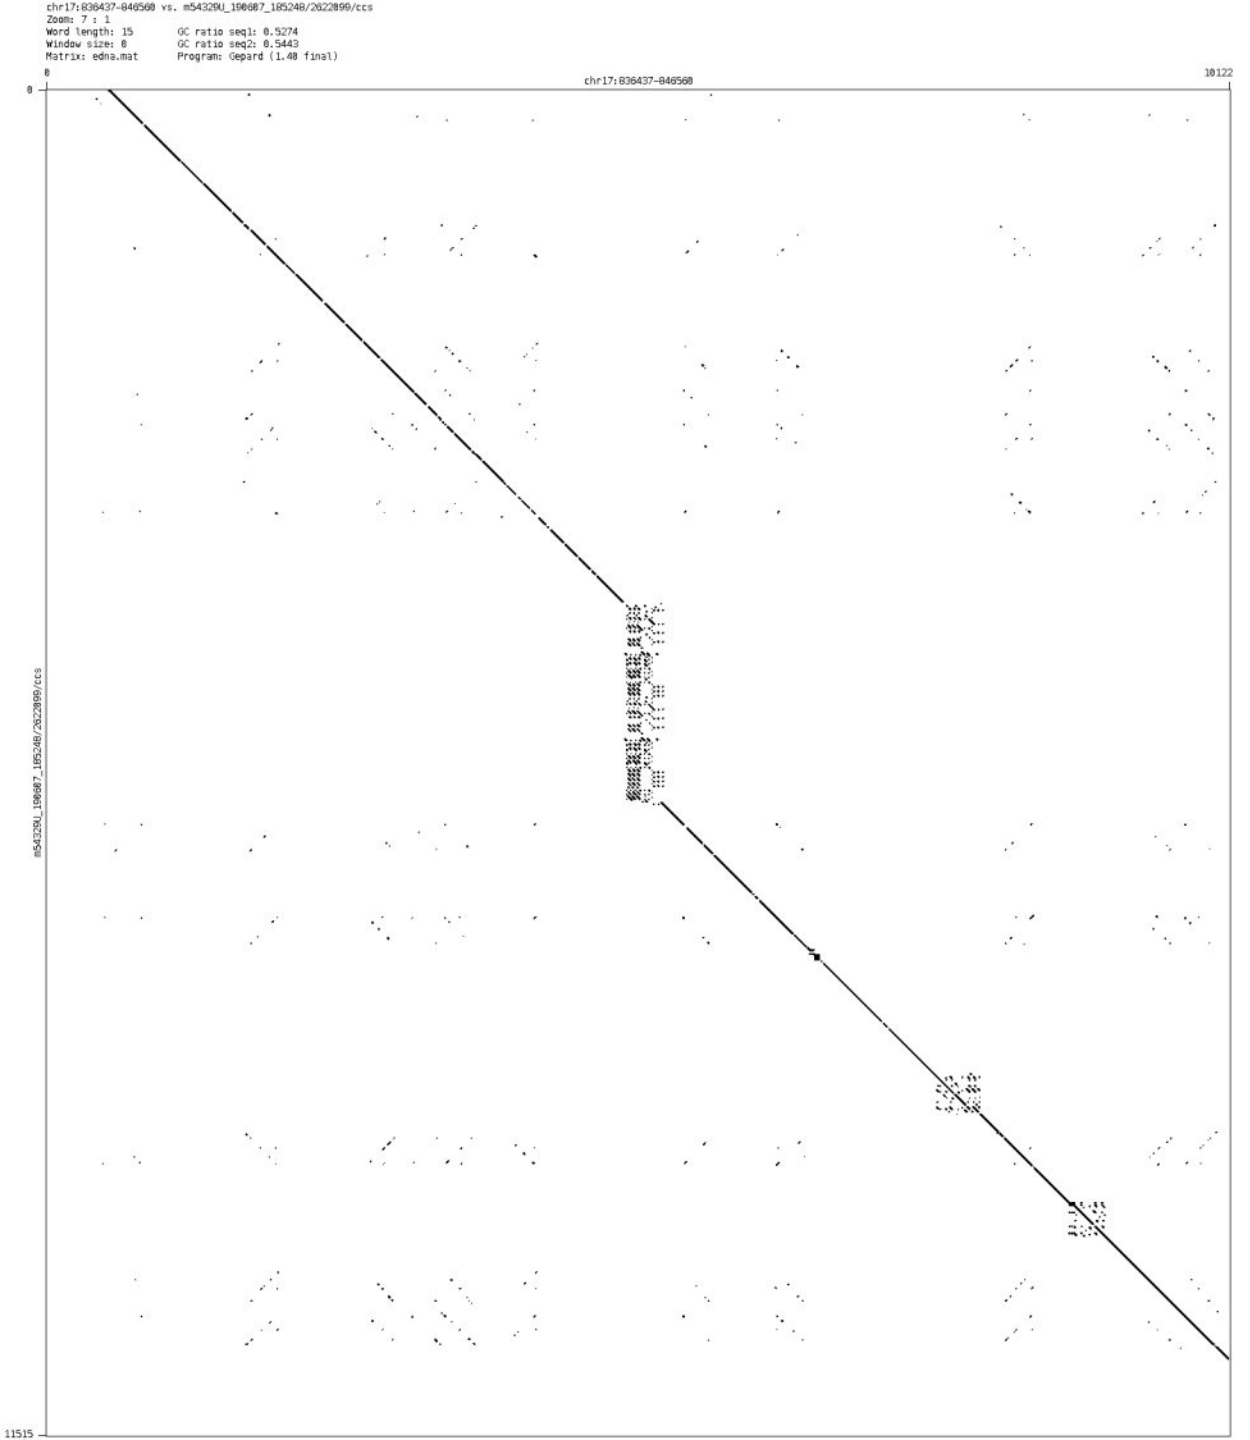



➤ chr17\_952712\_952801

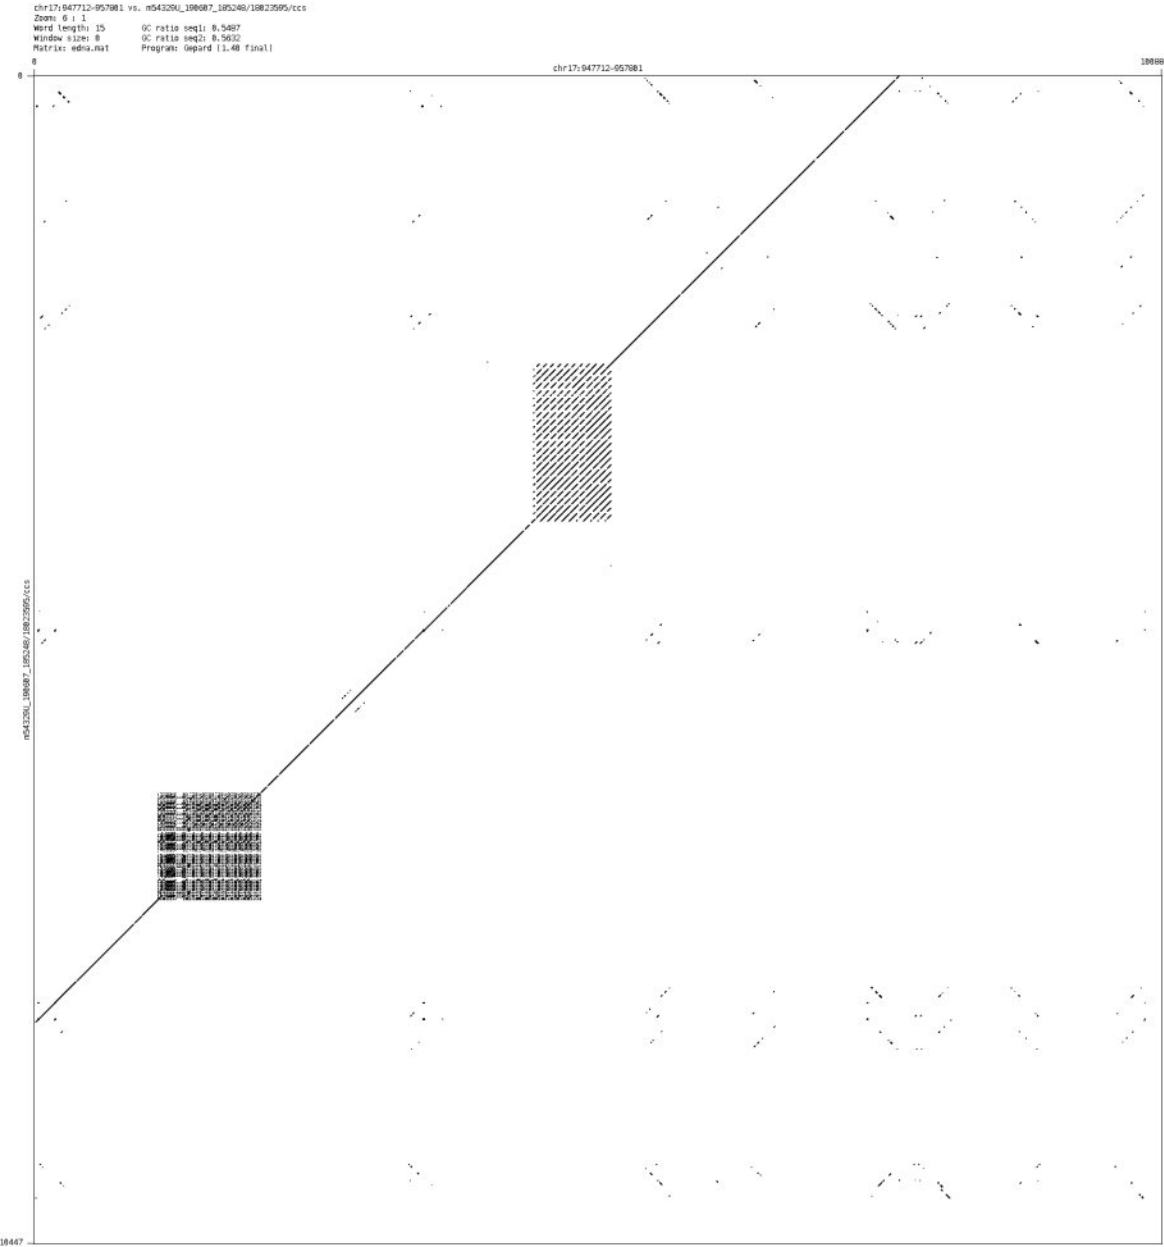

➤ chr17\_1159495\_1159678

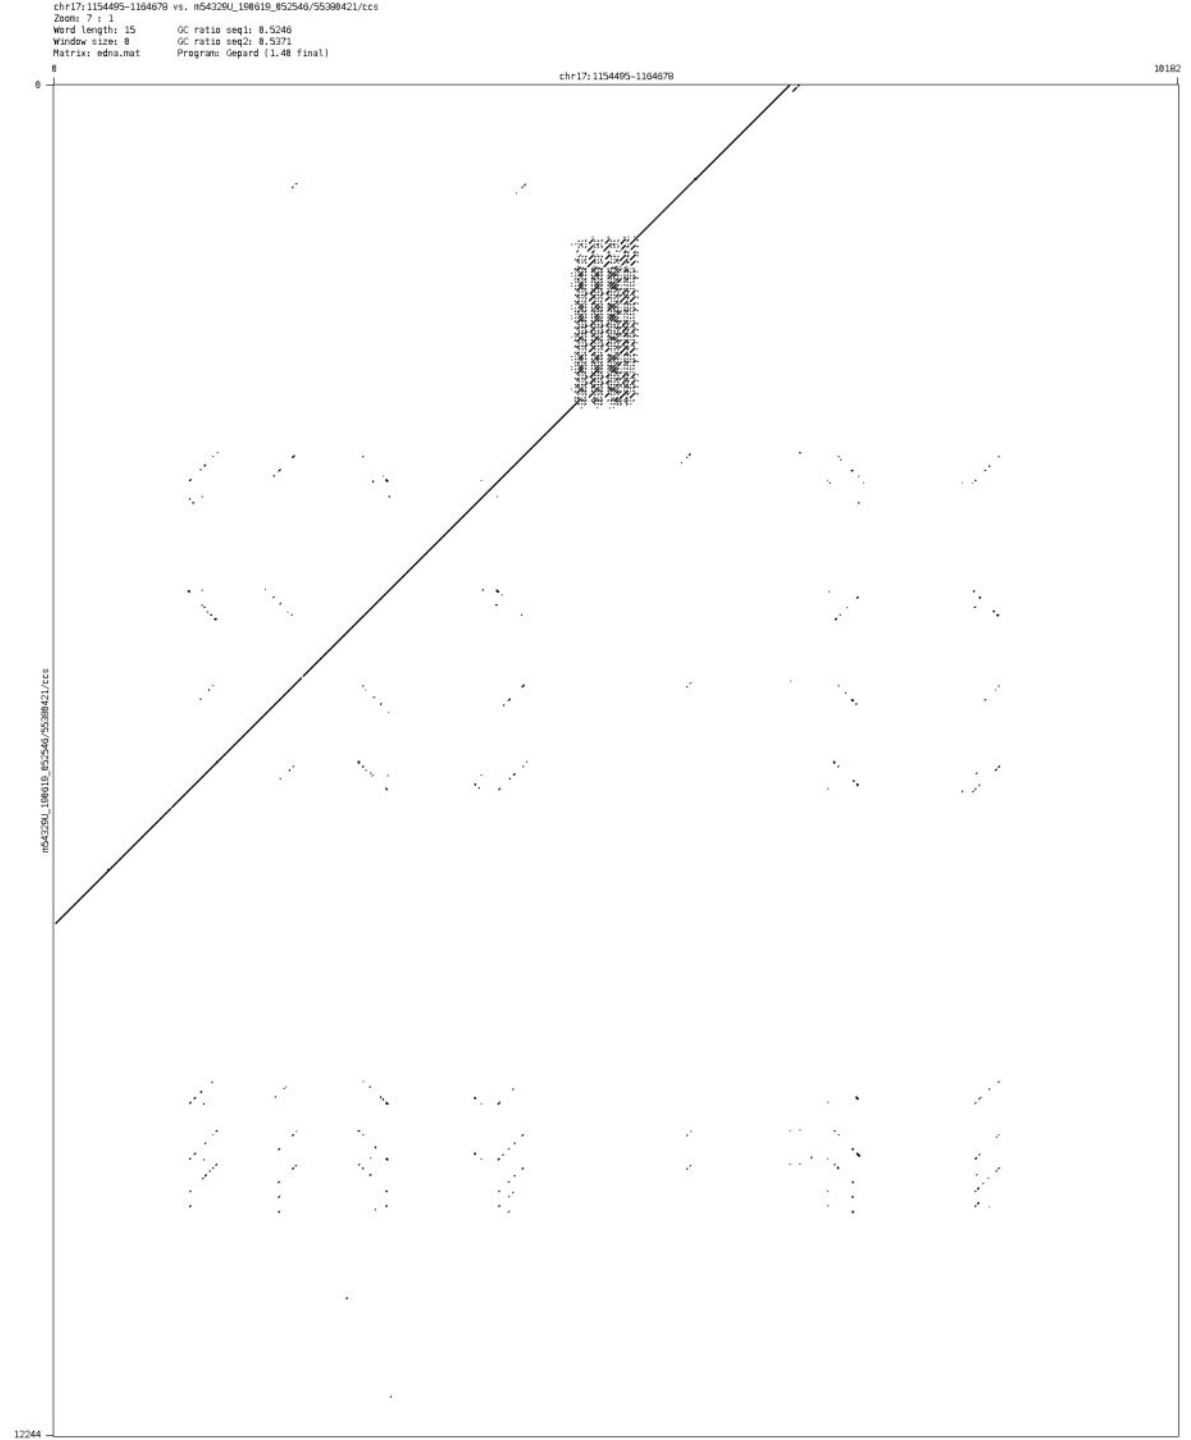

➤ chr17\_6194135\_6194242

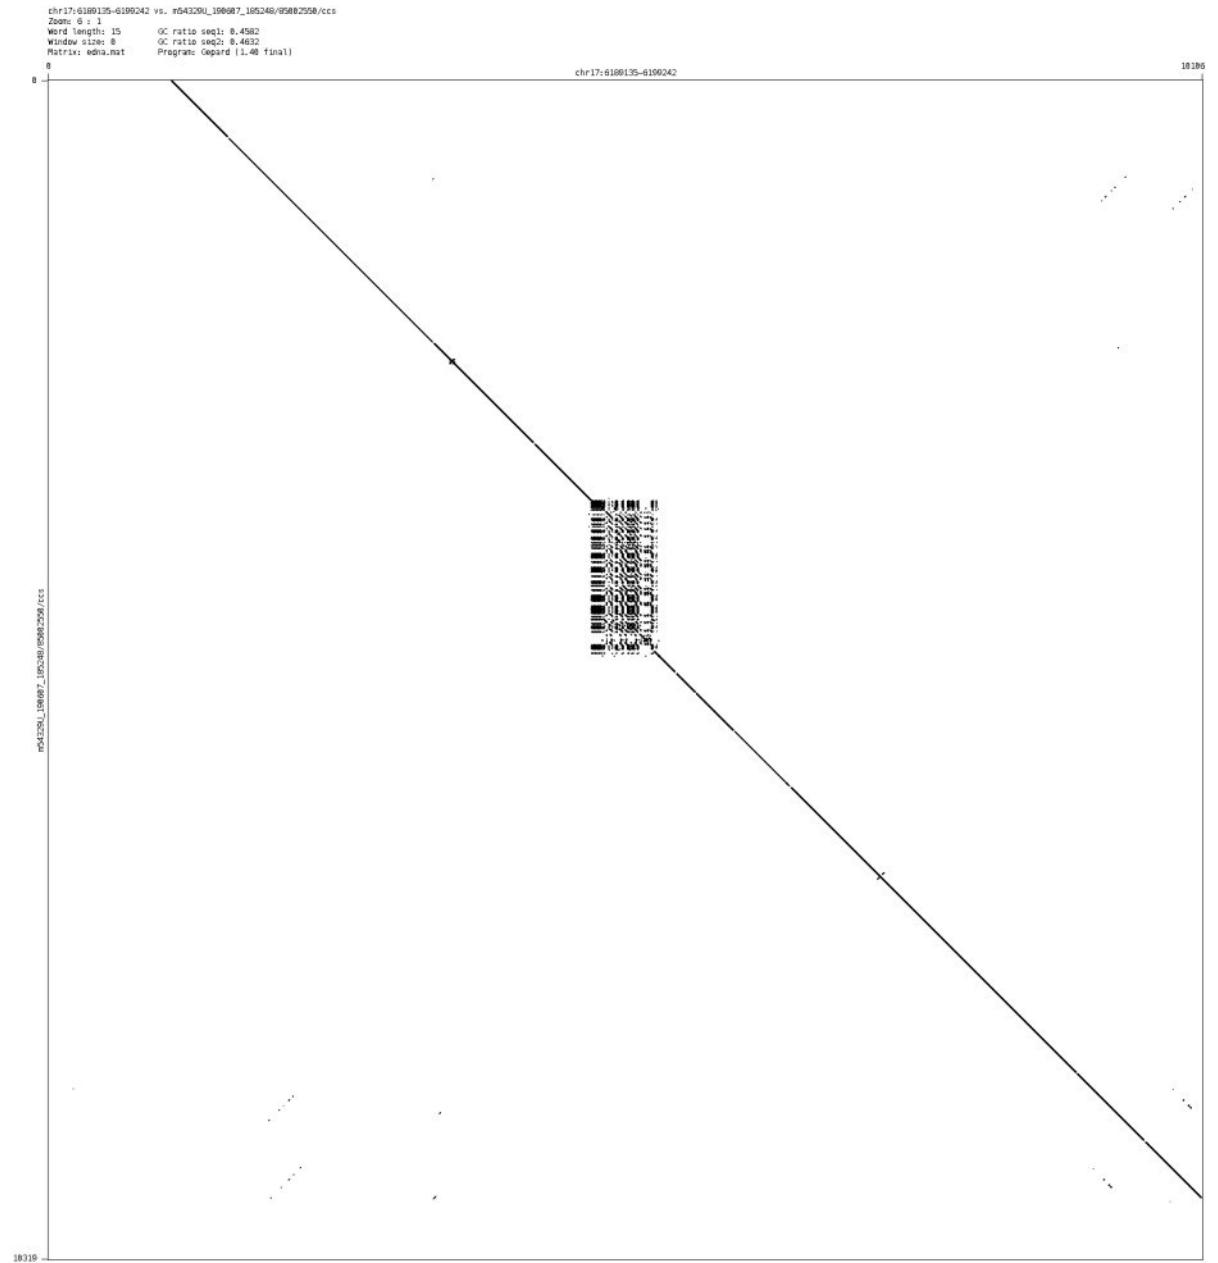

➤ chr17\_17460134\_17460311

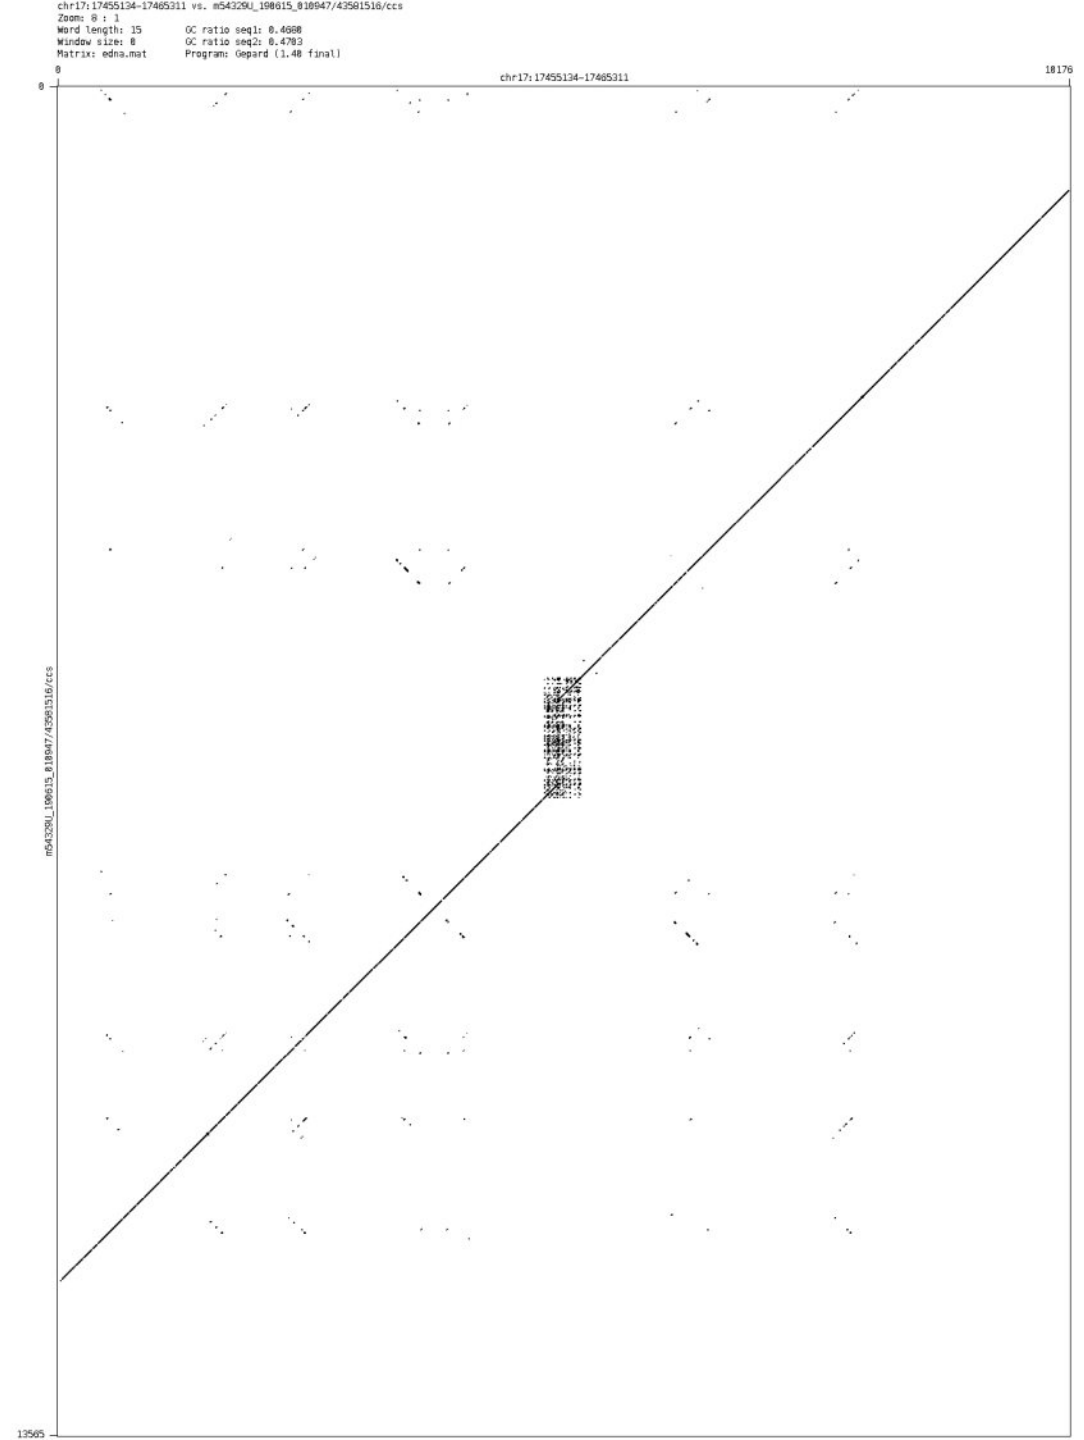

➤ chr17\_34854438\_34855851

chr17:34849438-34860851 vs. m54329U\_190607\_185248/22807821/ccs  
Zoom: 7 : 1  
Word length: 15 GC ratio seq1: 0.4924  
Window size: 0 GC ratio seq2: 0.4996  
Matrix: edna.mat Program: Gepard (1.40 final)

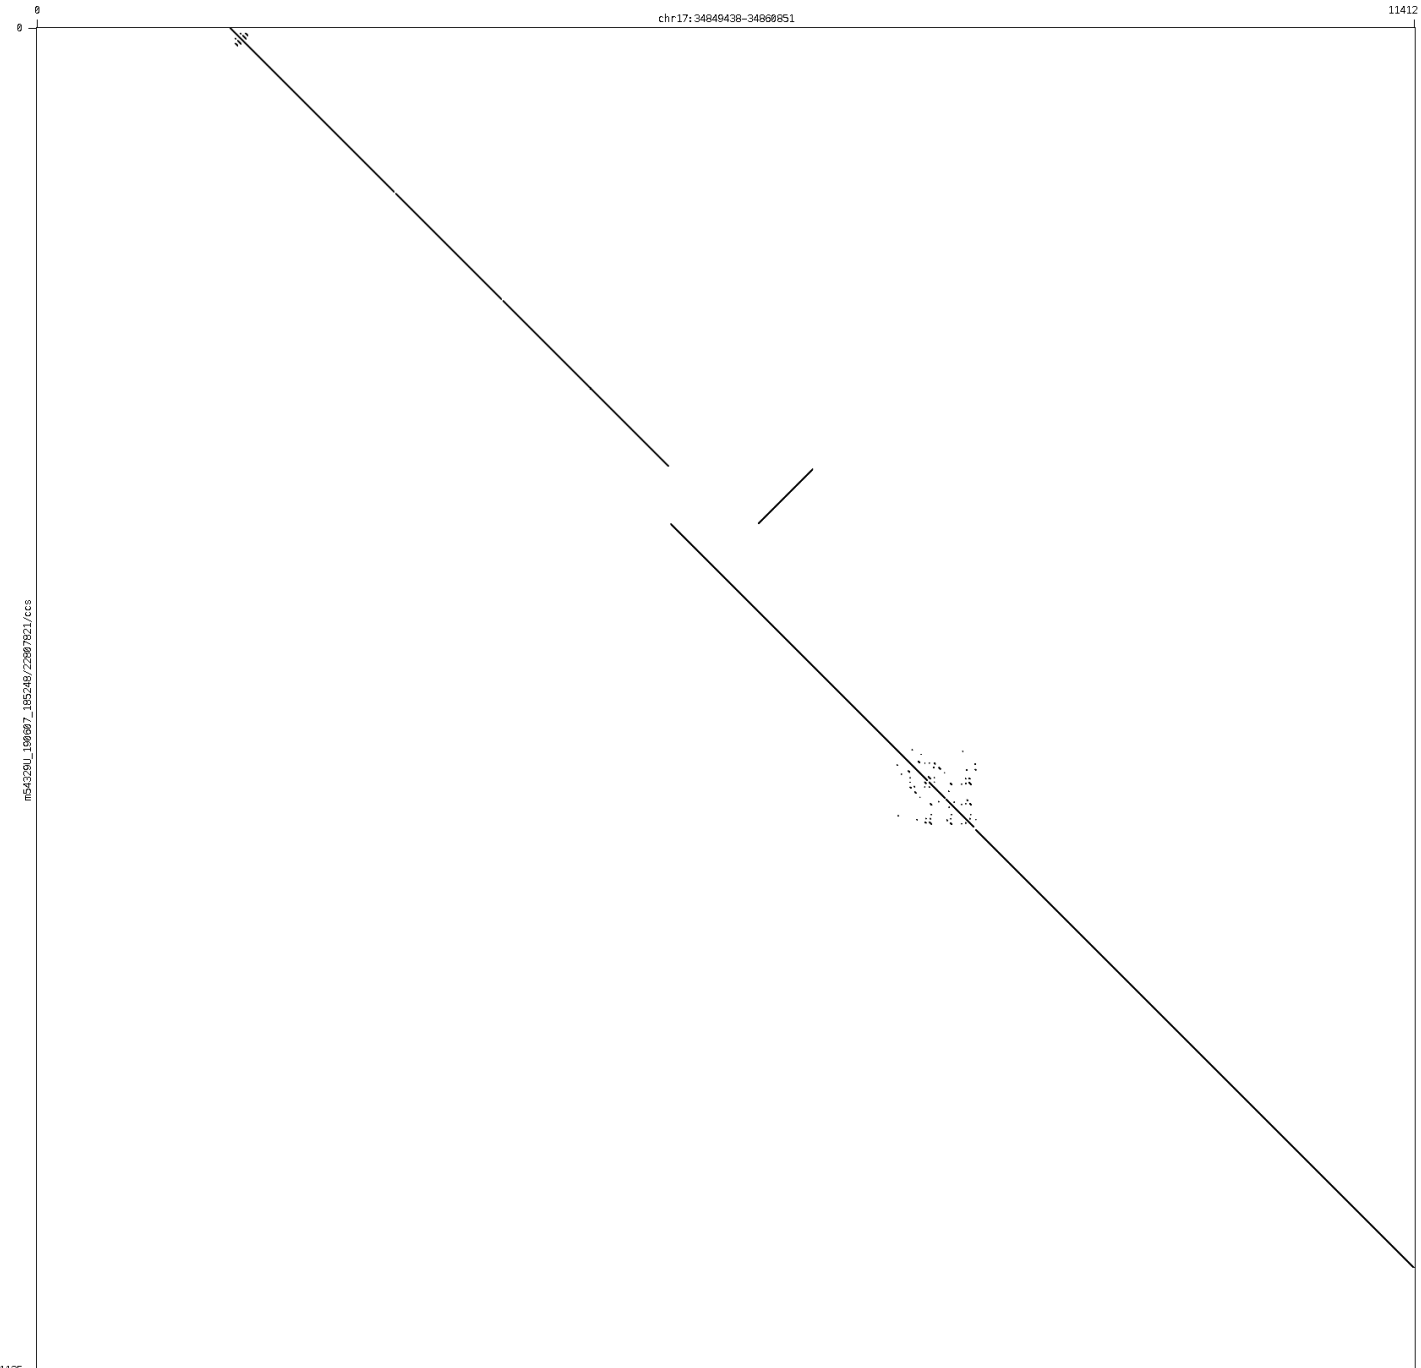

➤ chr17\_41632760\_41633721

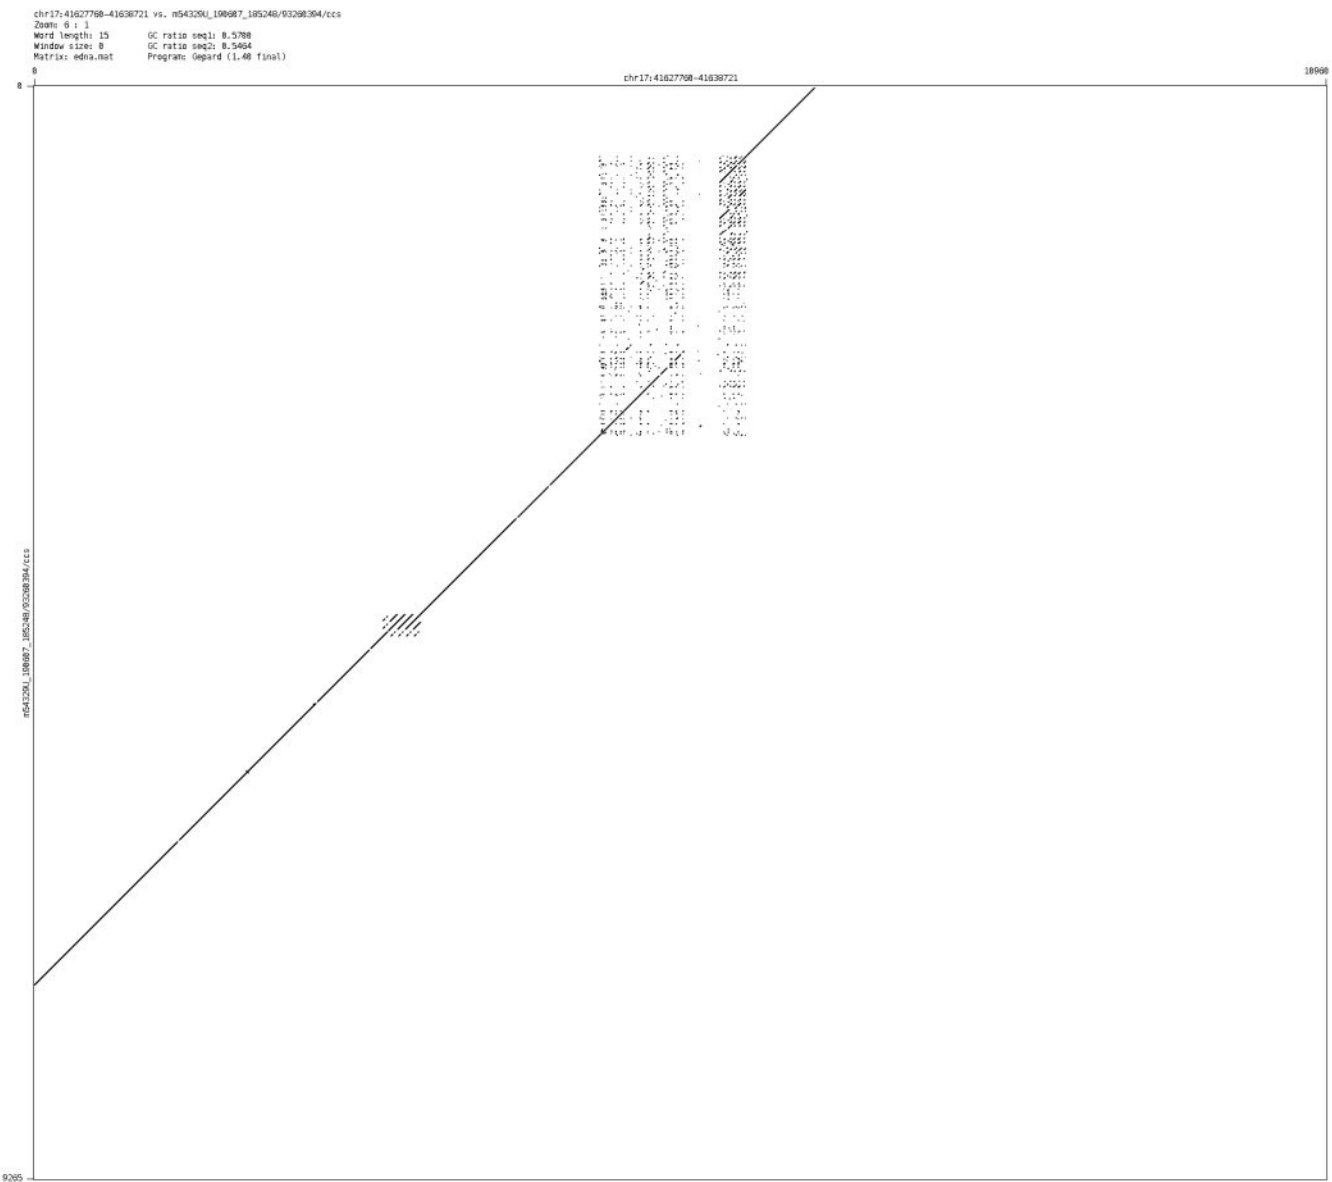

➤ chr17\_48538270\_48540171

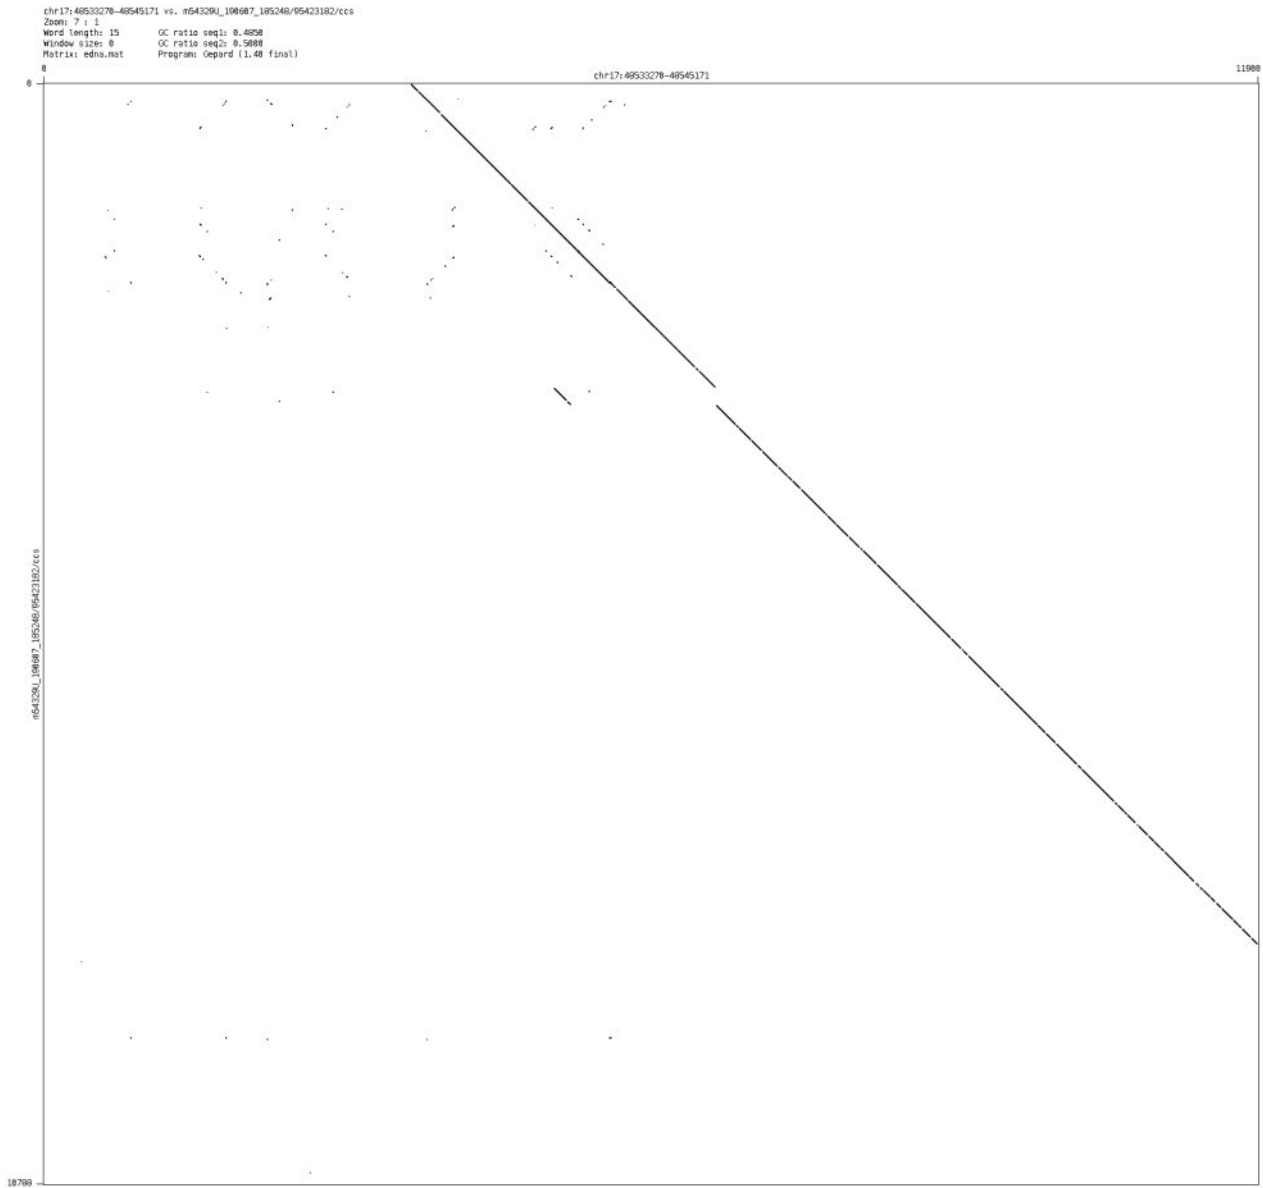

➤ chr17\_56792755\_56792881

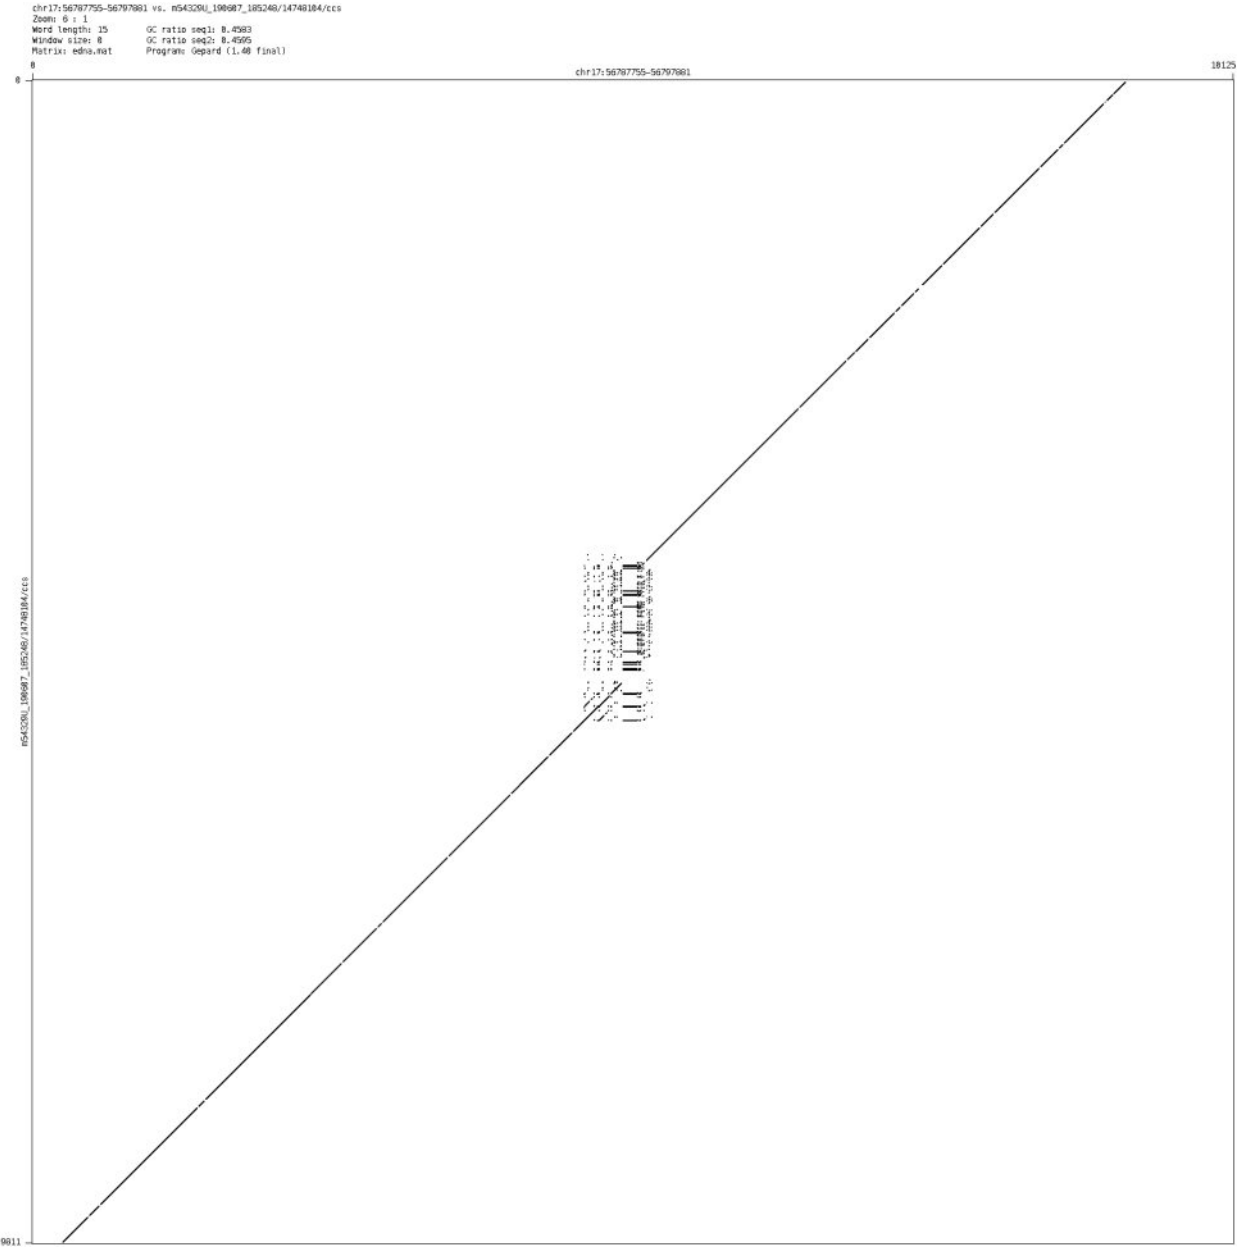



➤ chr17\_65499952\_65500292

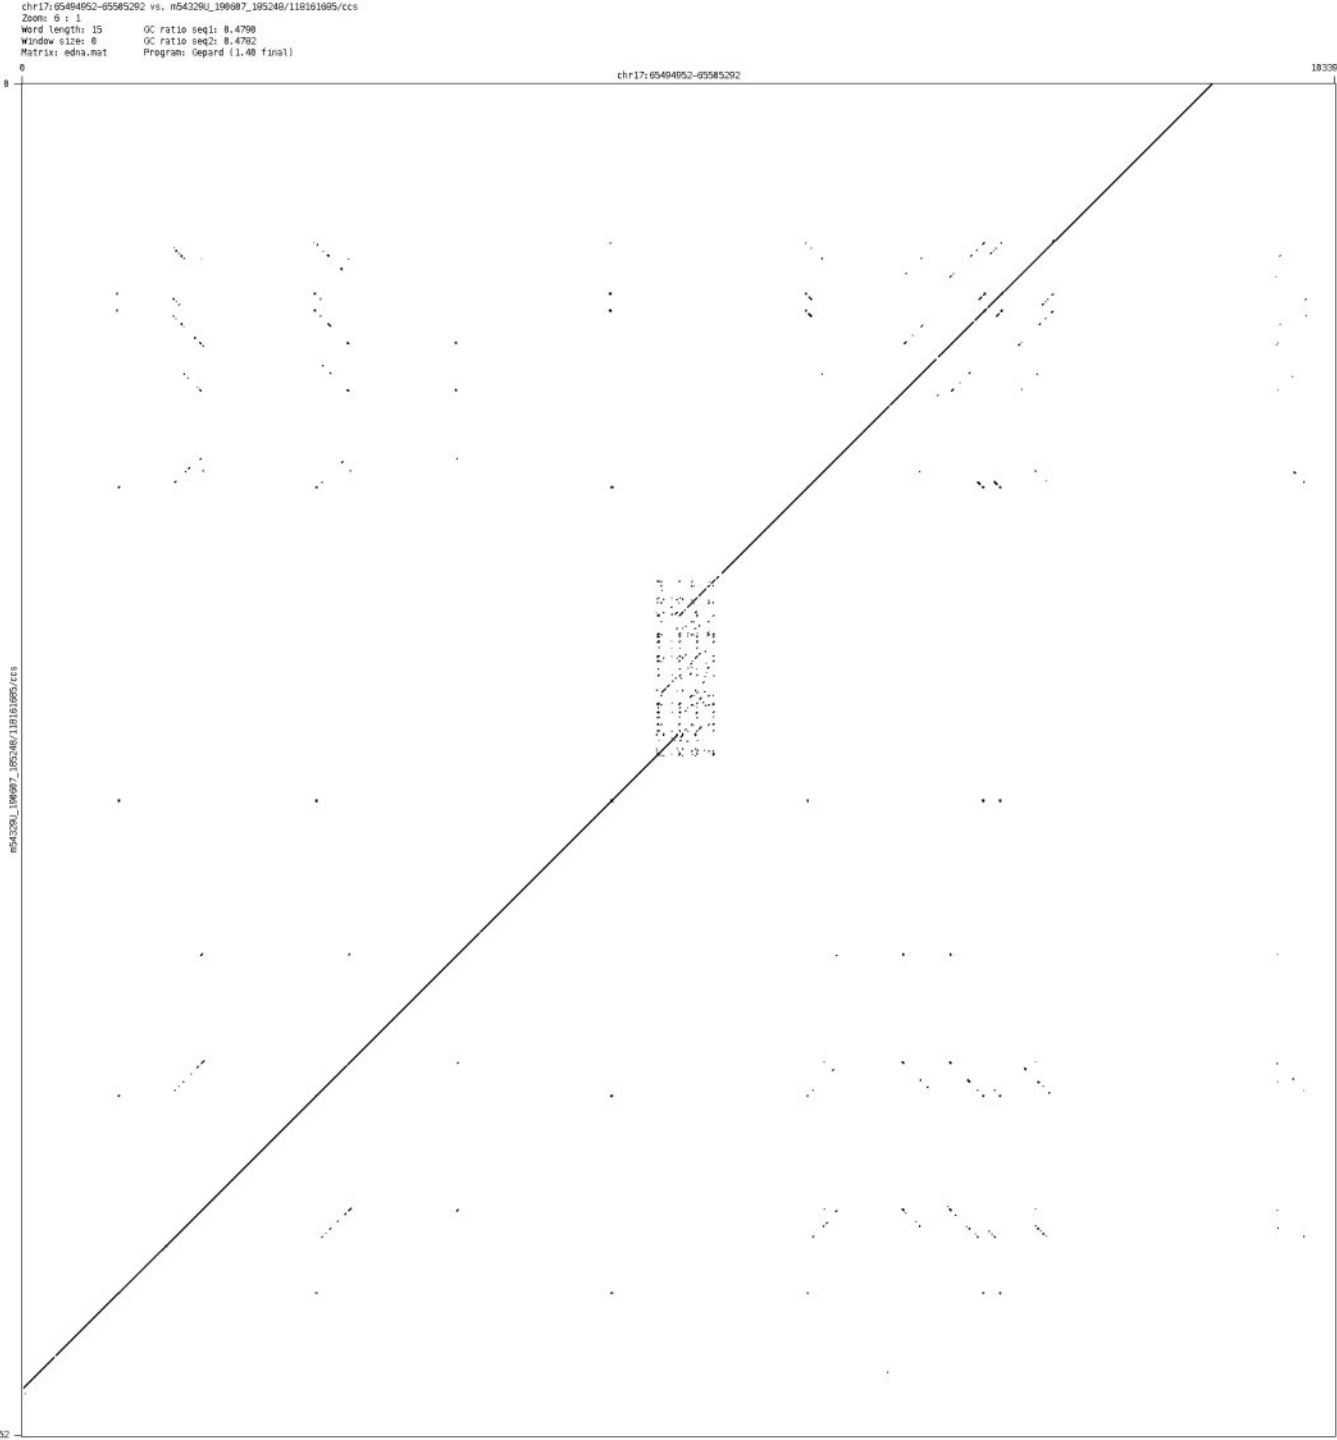

➤ chr17\_66798674\_66798865

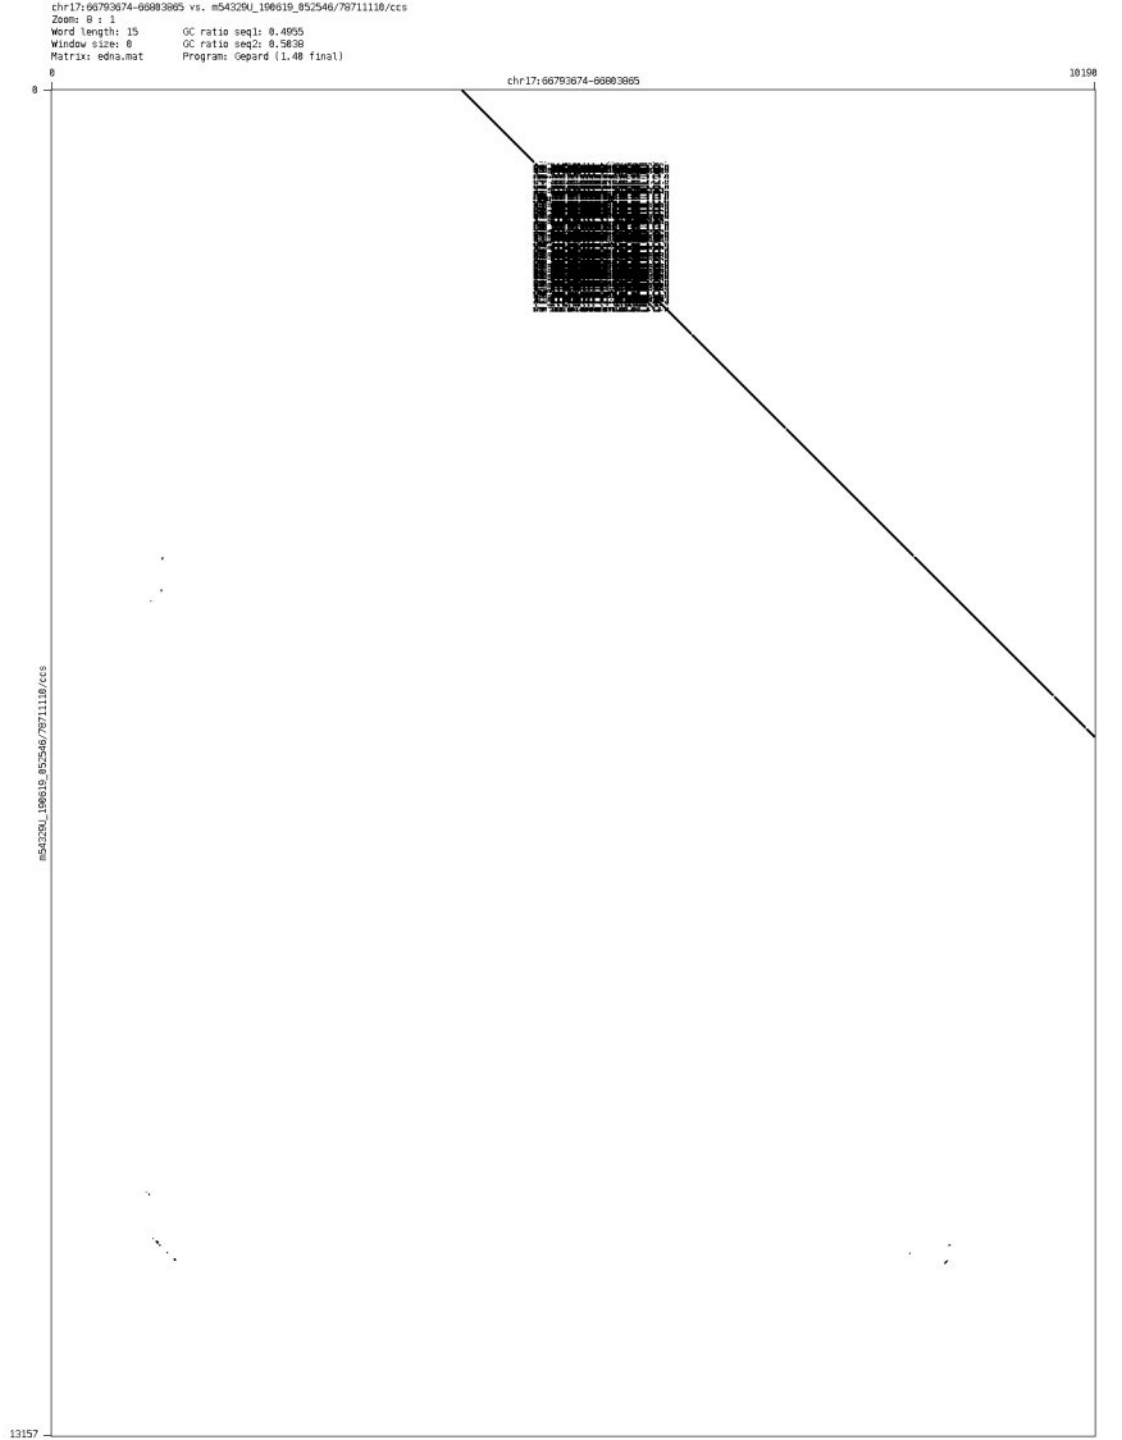

➤ chr17\_73219884\_73221595

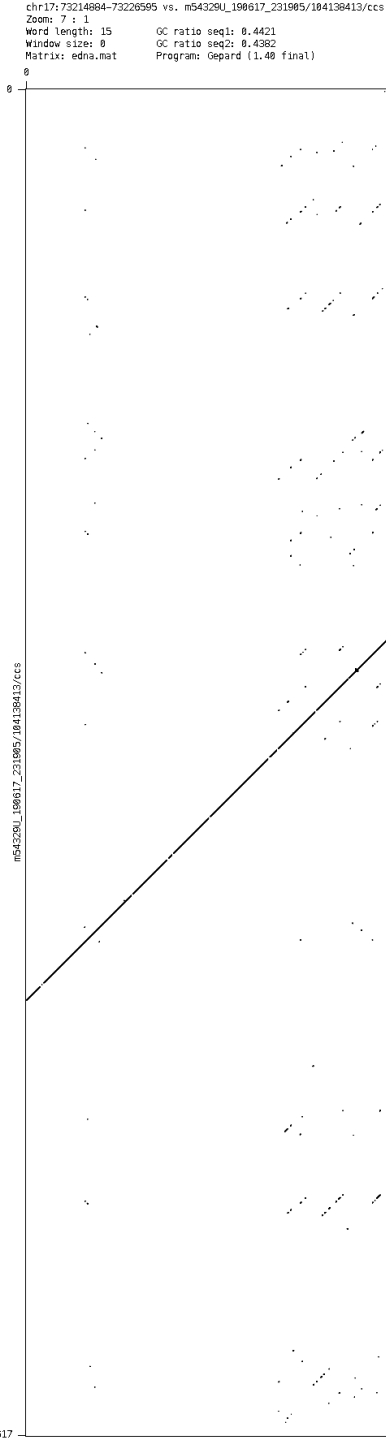

➤ chr17\_74732756\_74733512

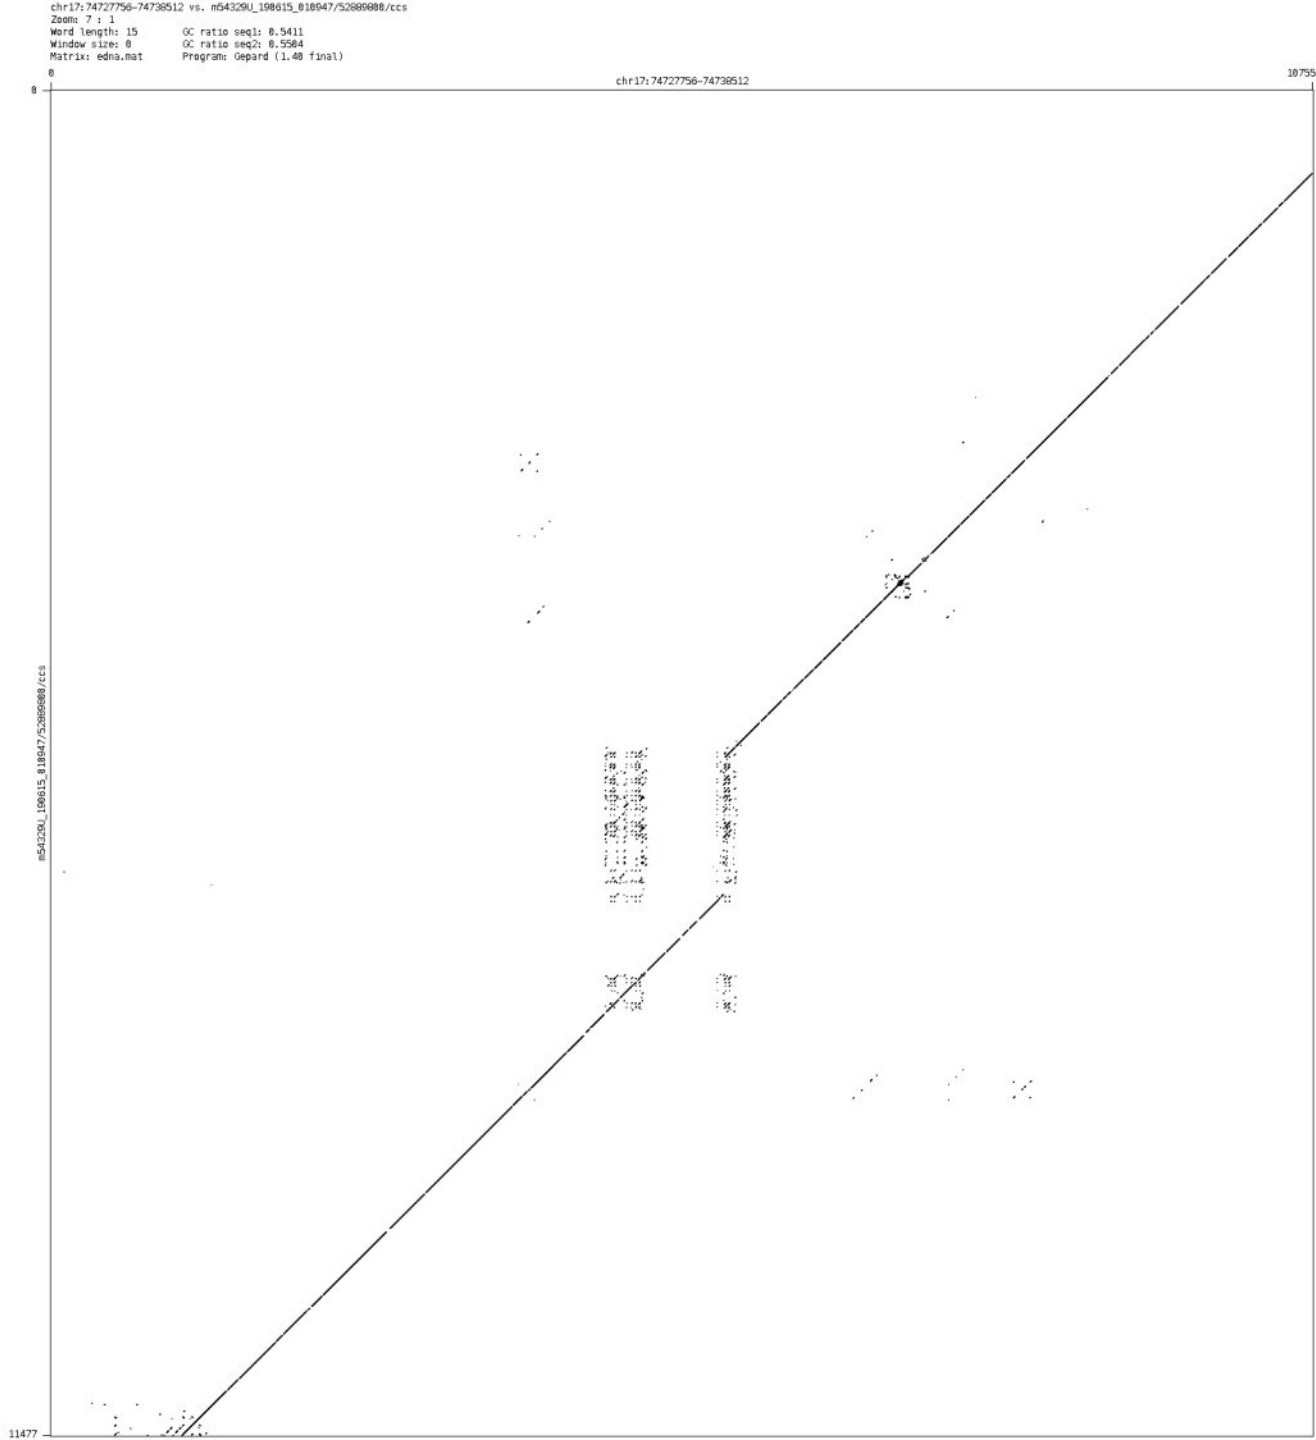

➤ chr17\_79555509\_79555782

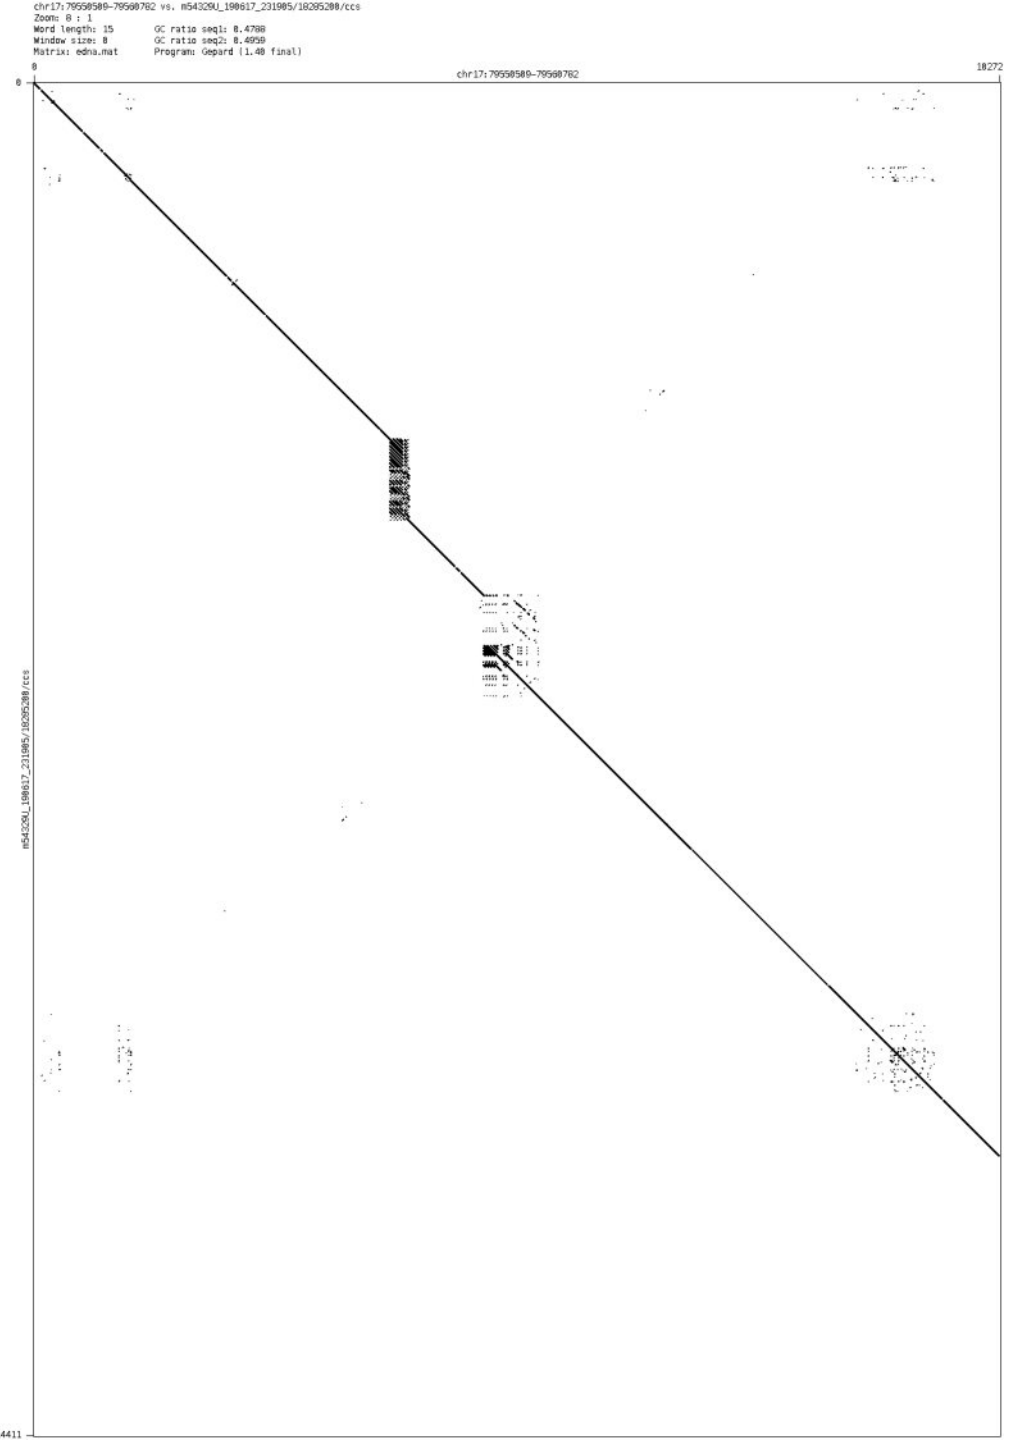

➤ chr17\_80024327\_80024606

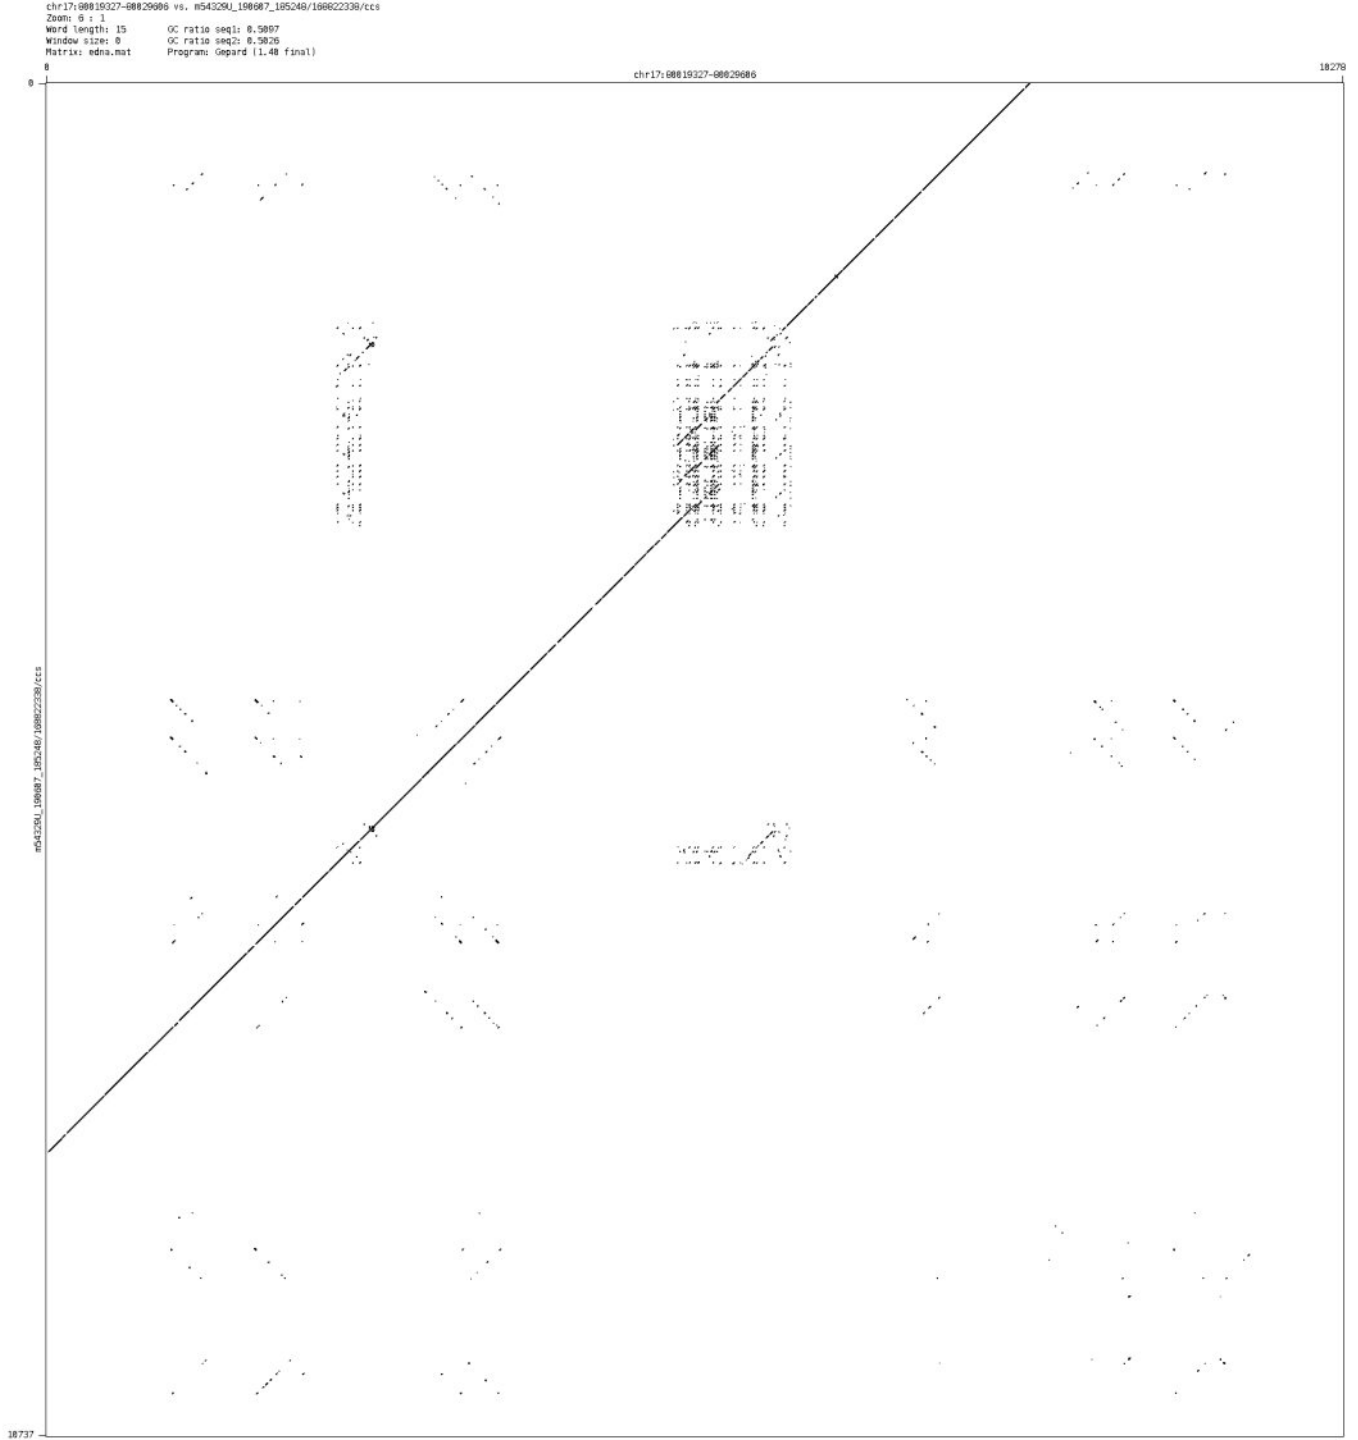

➤ chr17\_80497958\_80498077

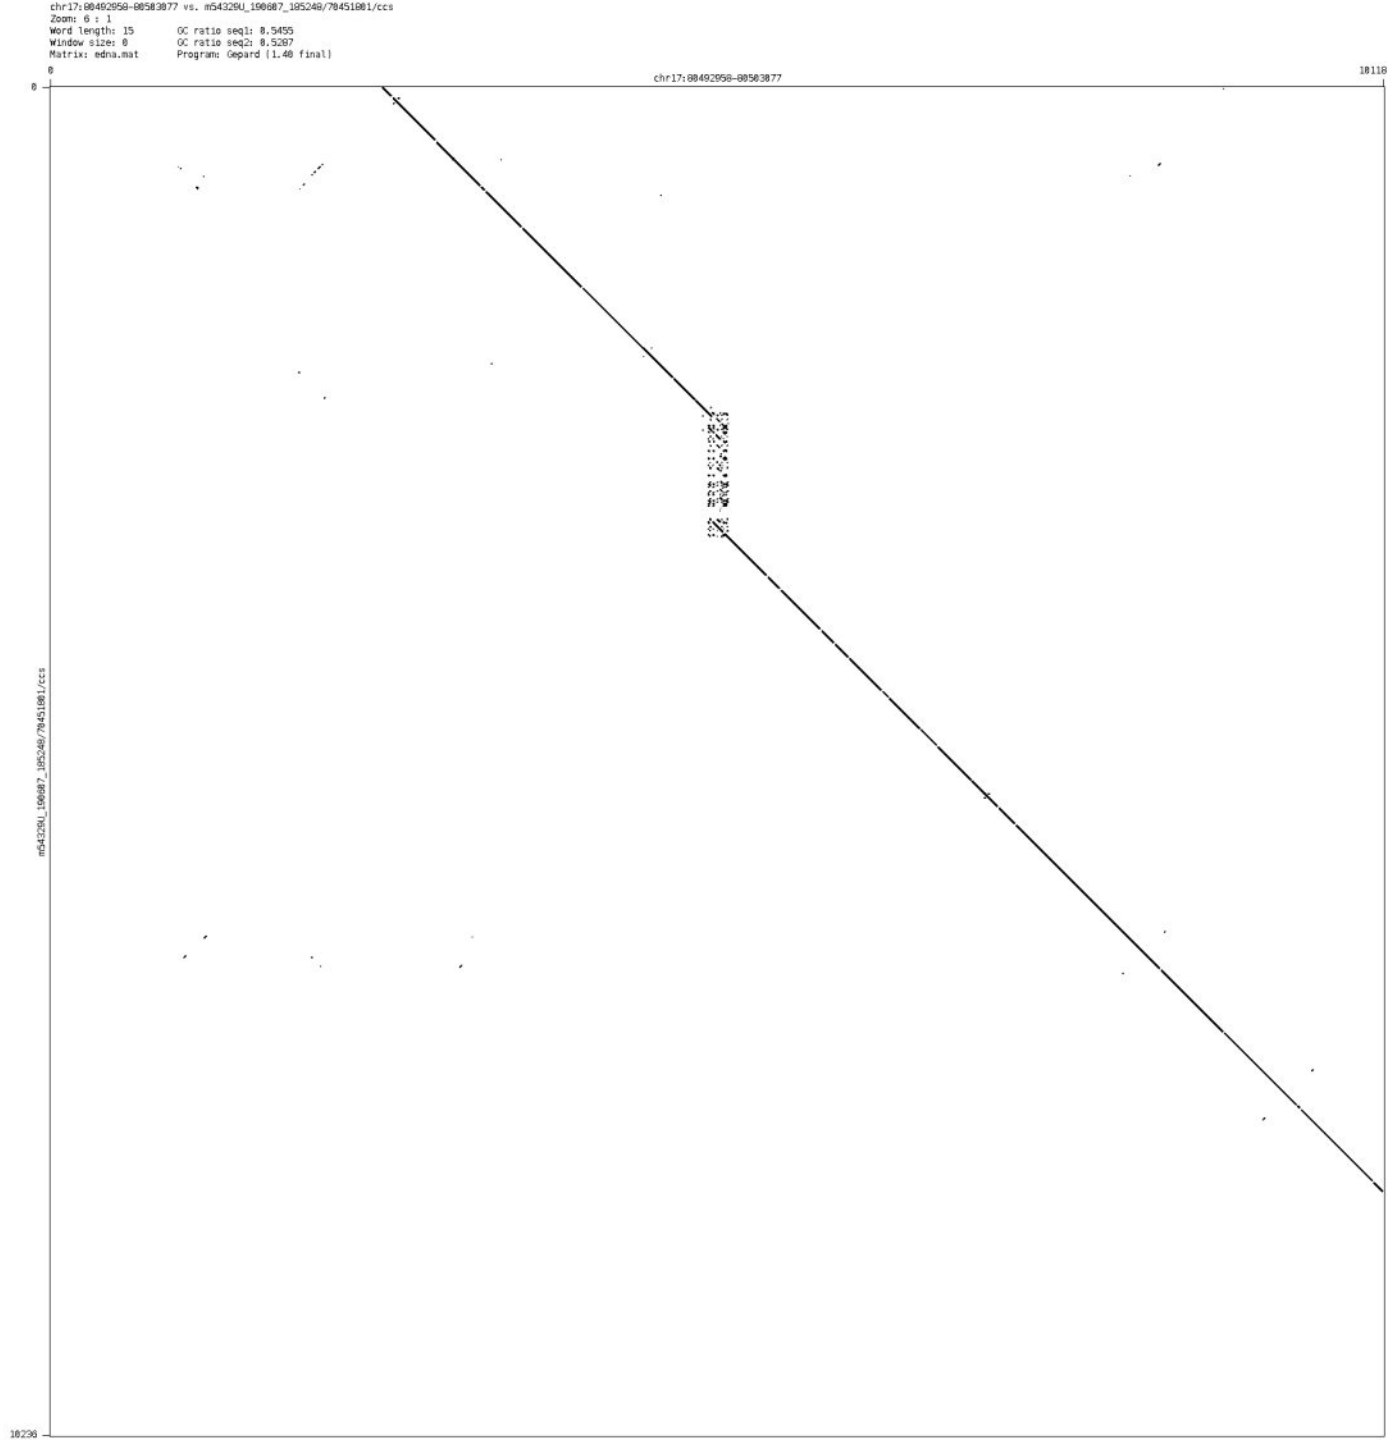

➤ chr17\_80743782\_80744966

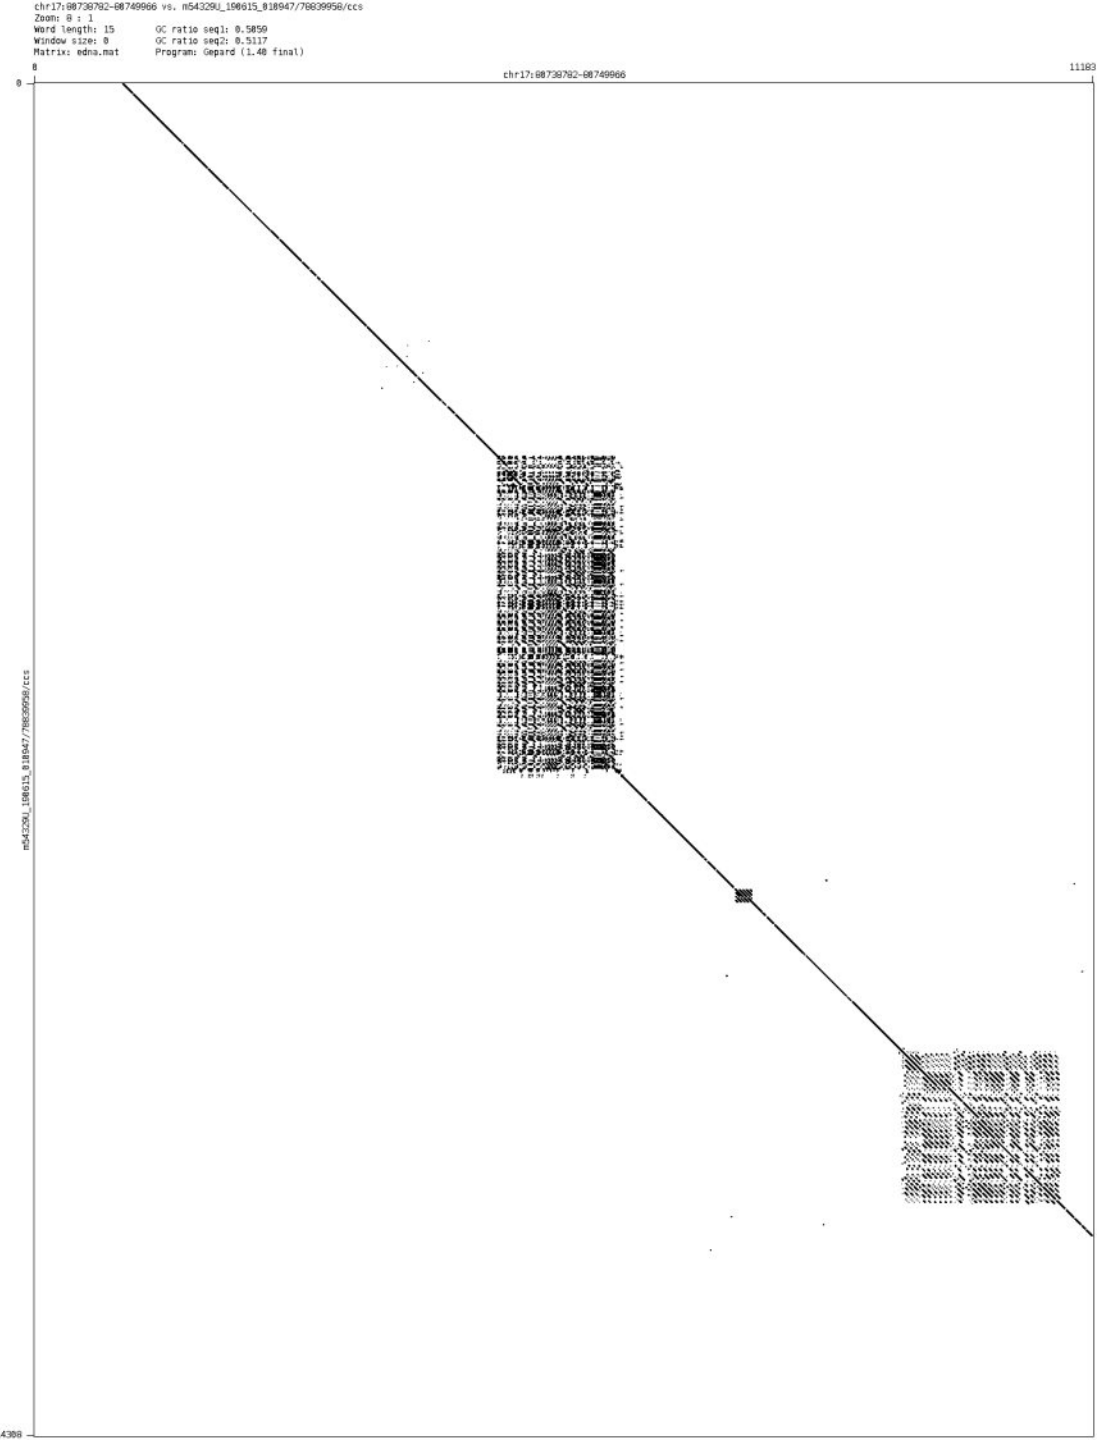



➤ chr17\_81249381\_81249456

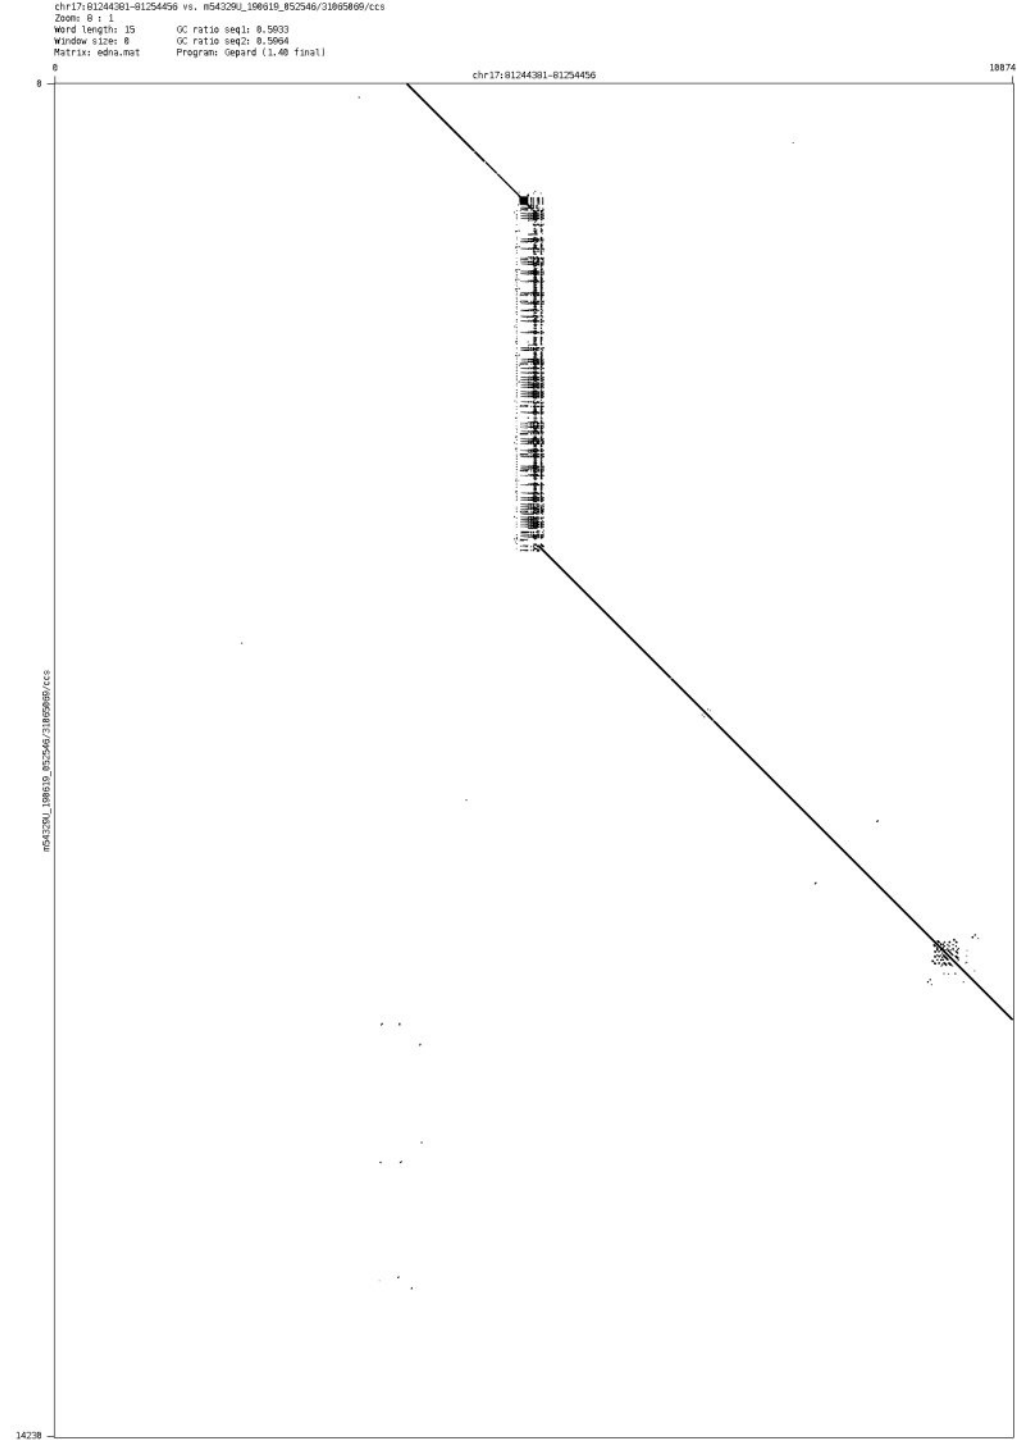

➤ chr17\_81425588\_81426317

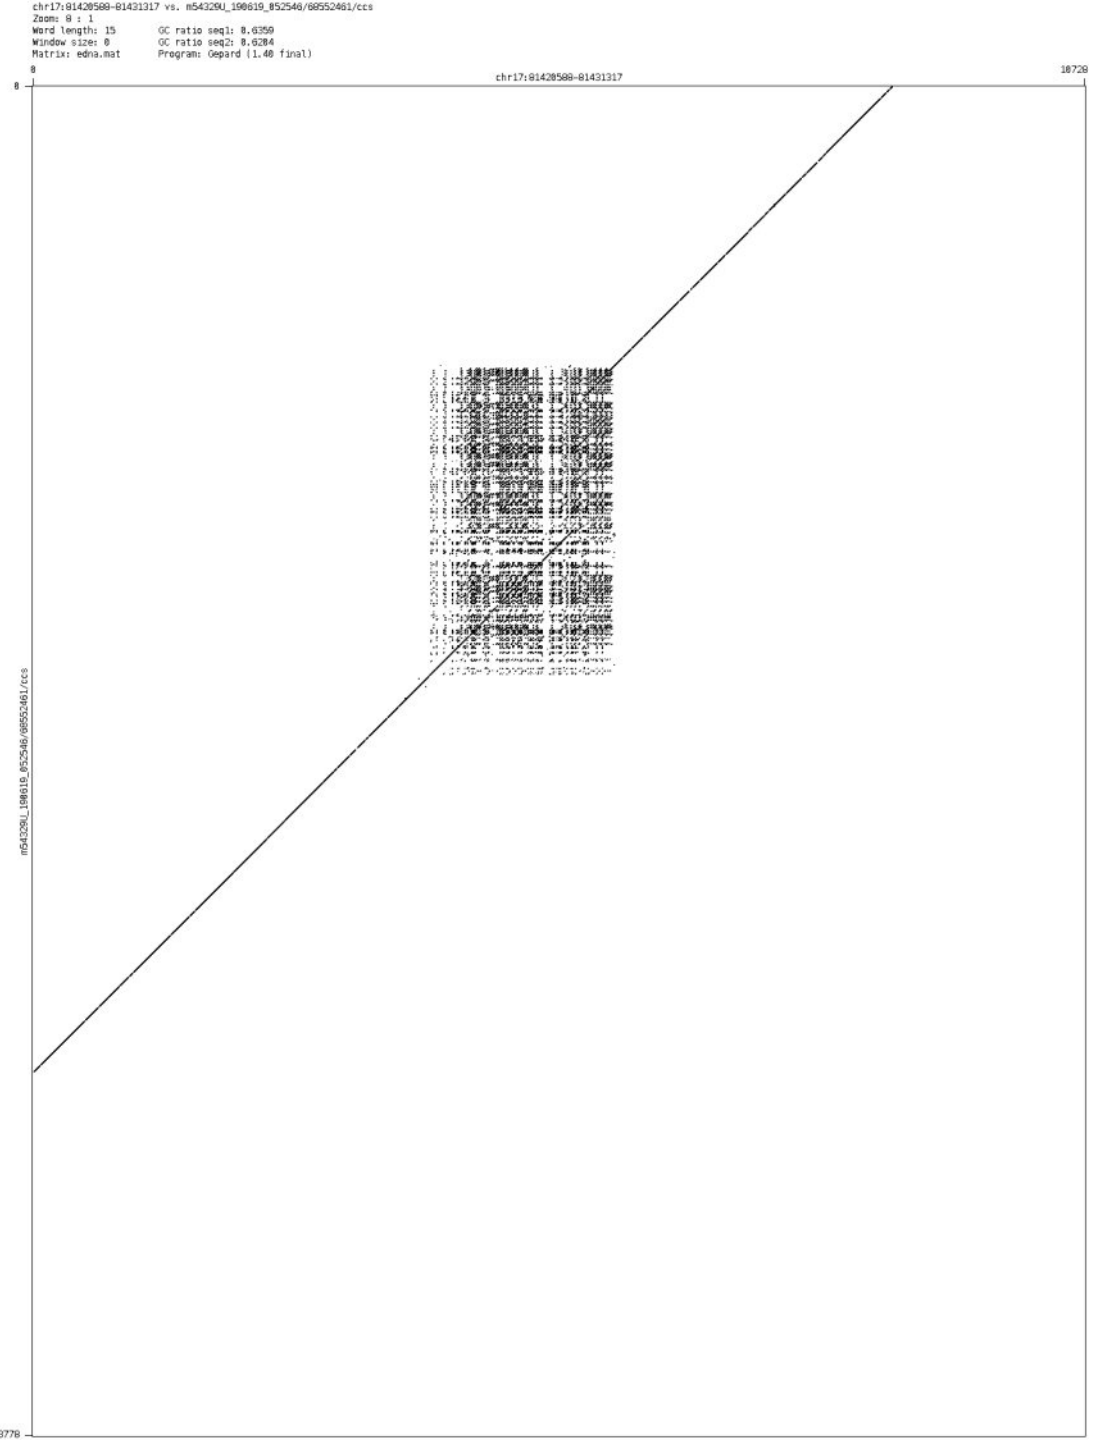

➤ chr18\_4510874\_4510952

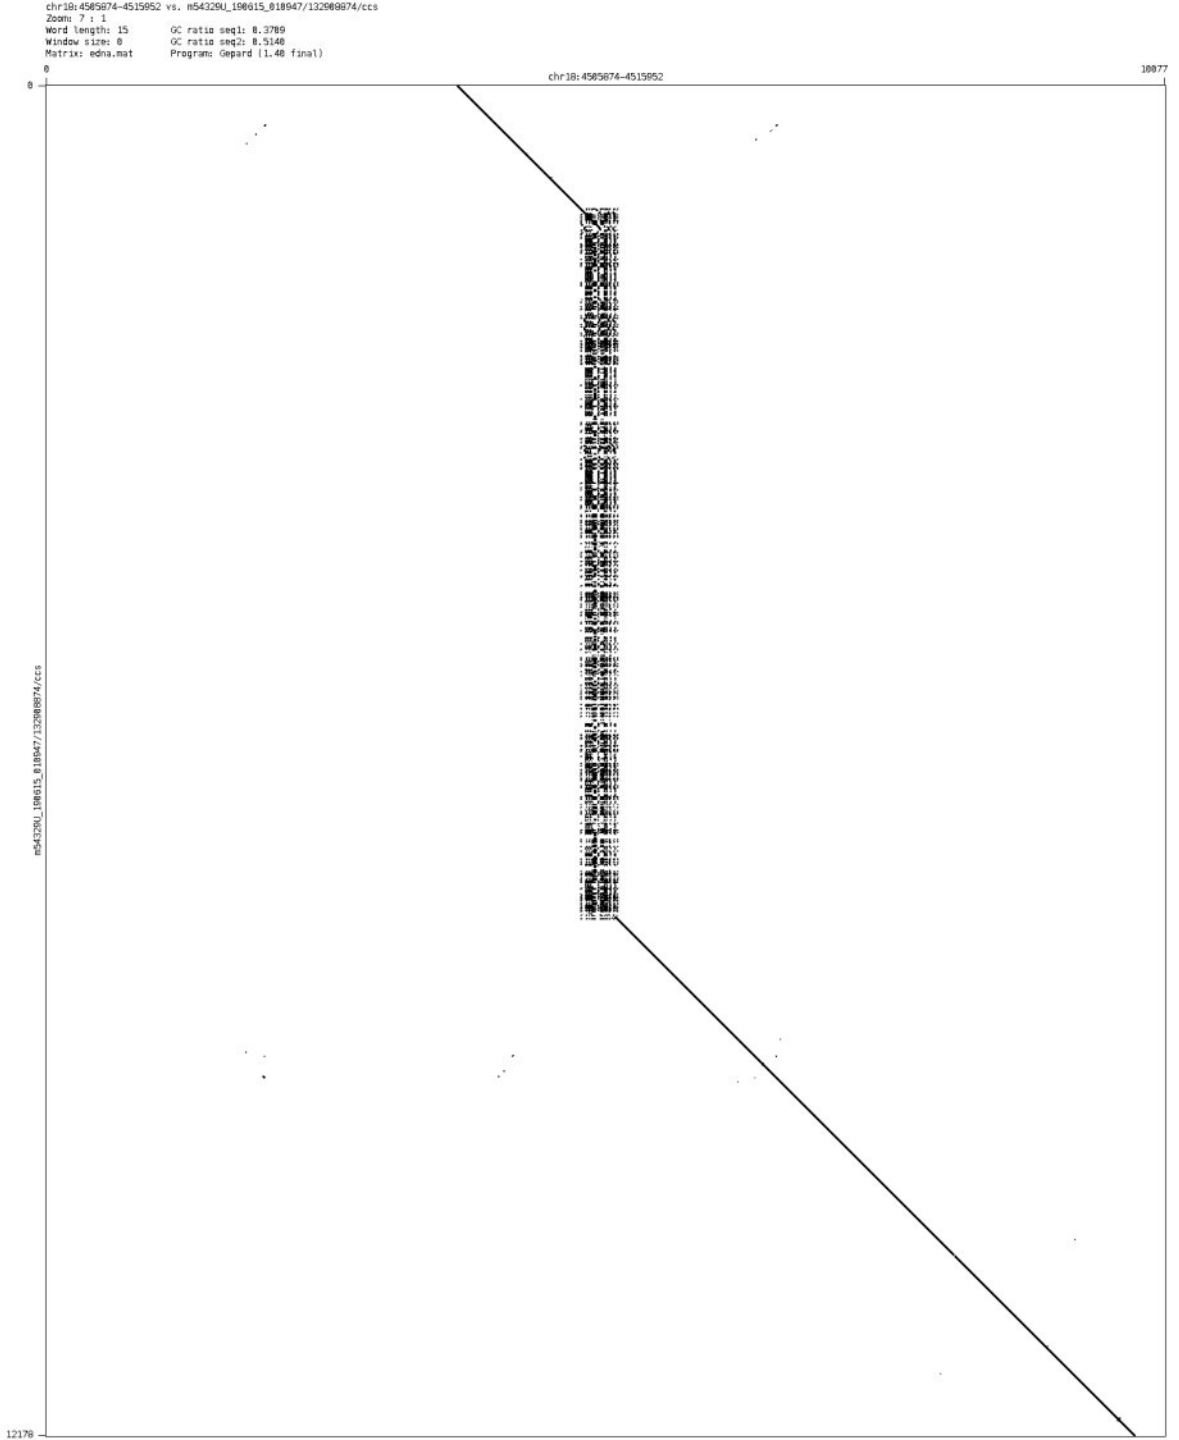

➤ chr18\_11508929\_11511476

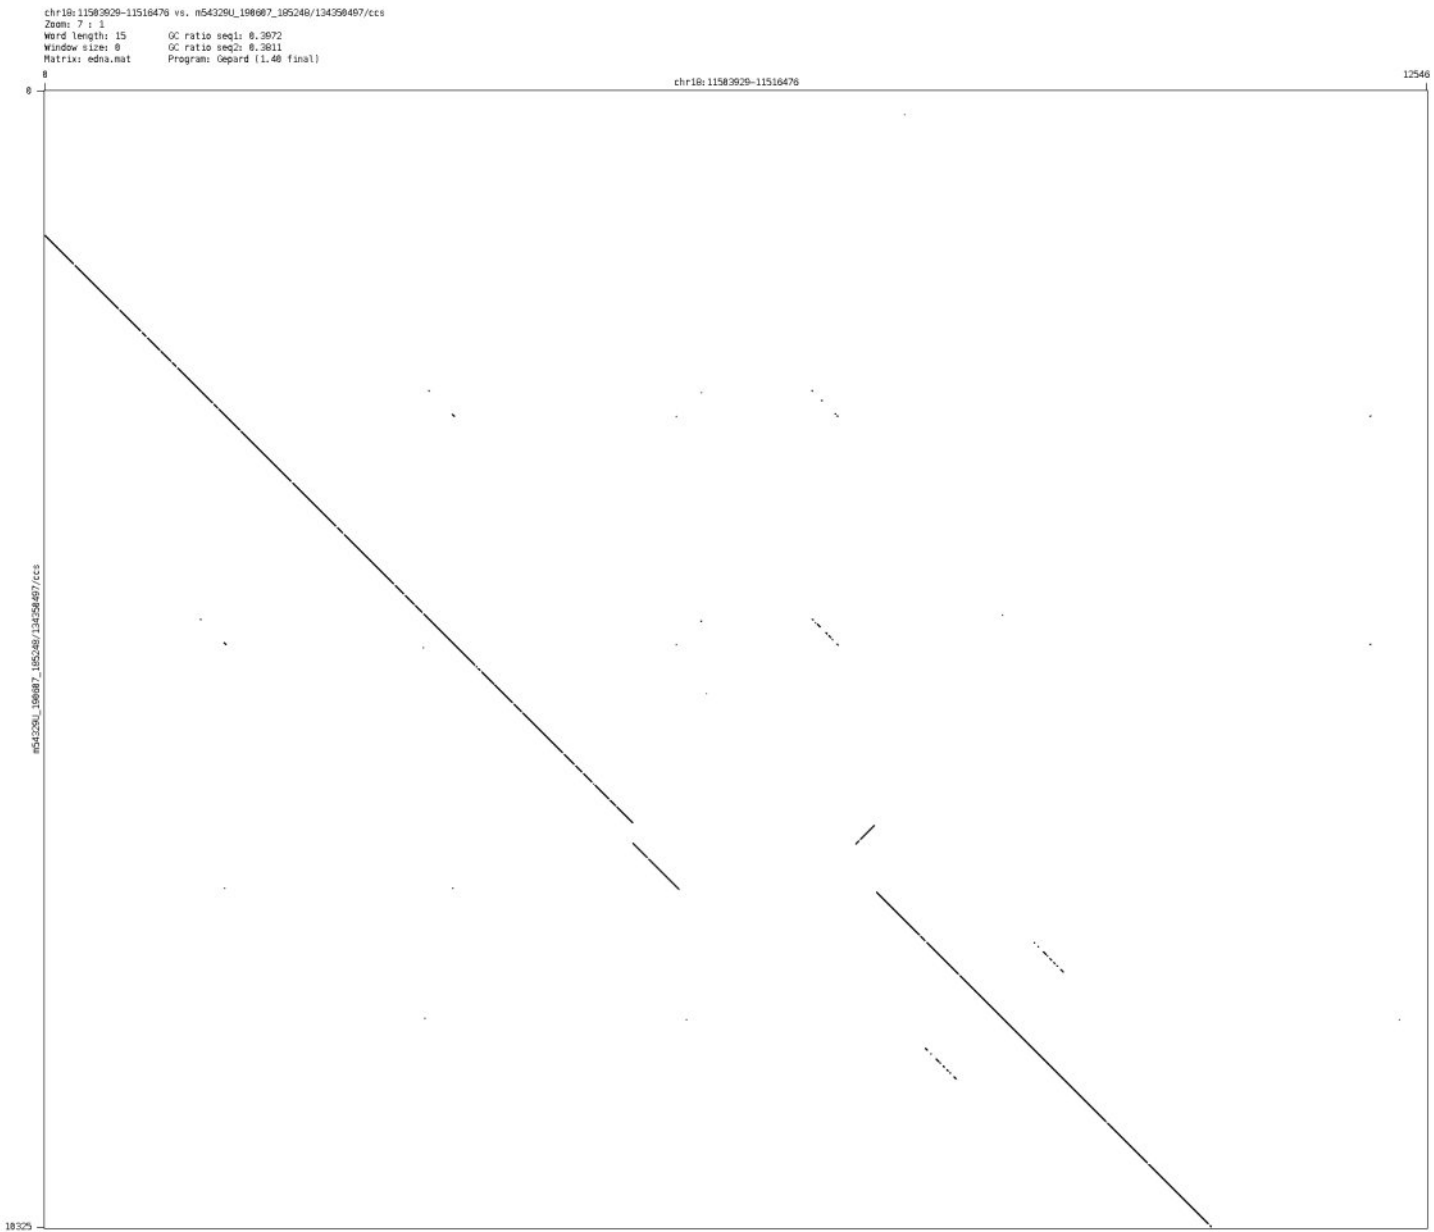

➤ chr18\_13262154\_13262356

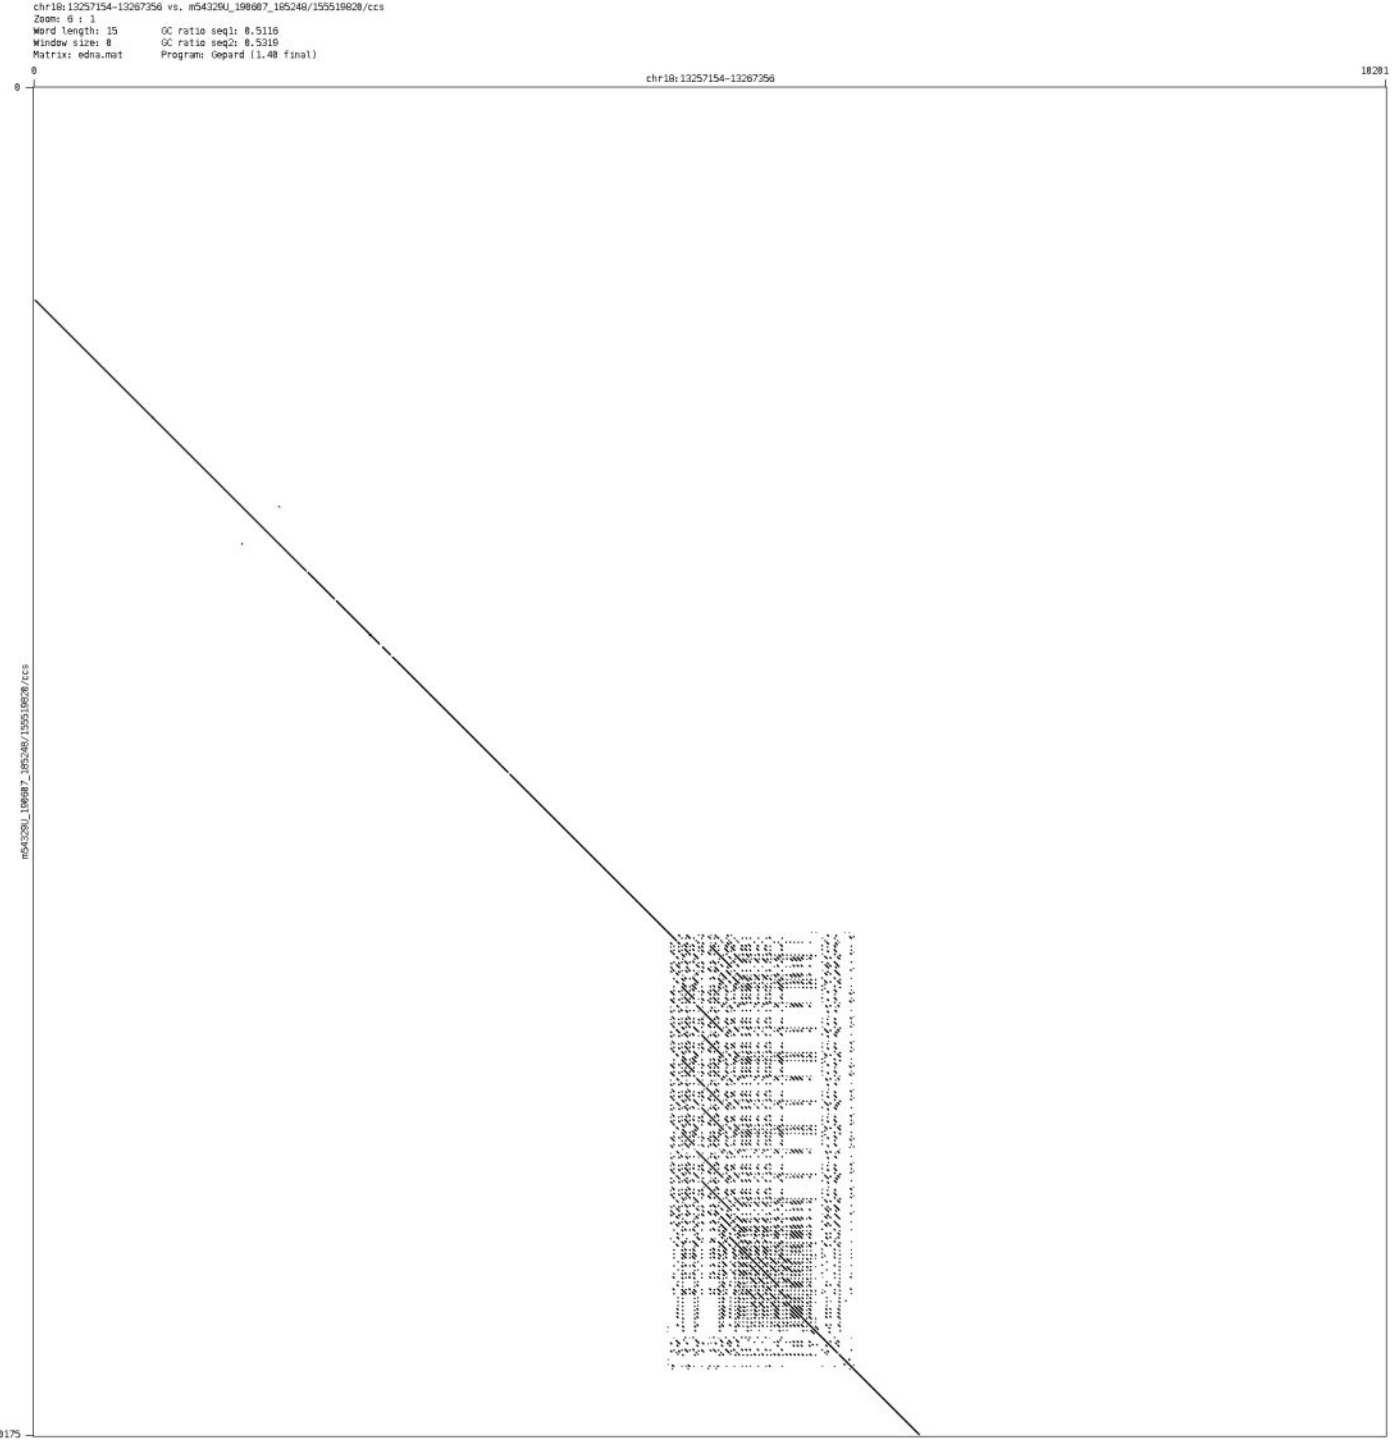

➤ chr18\_22232227\_22232573

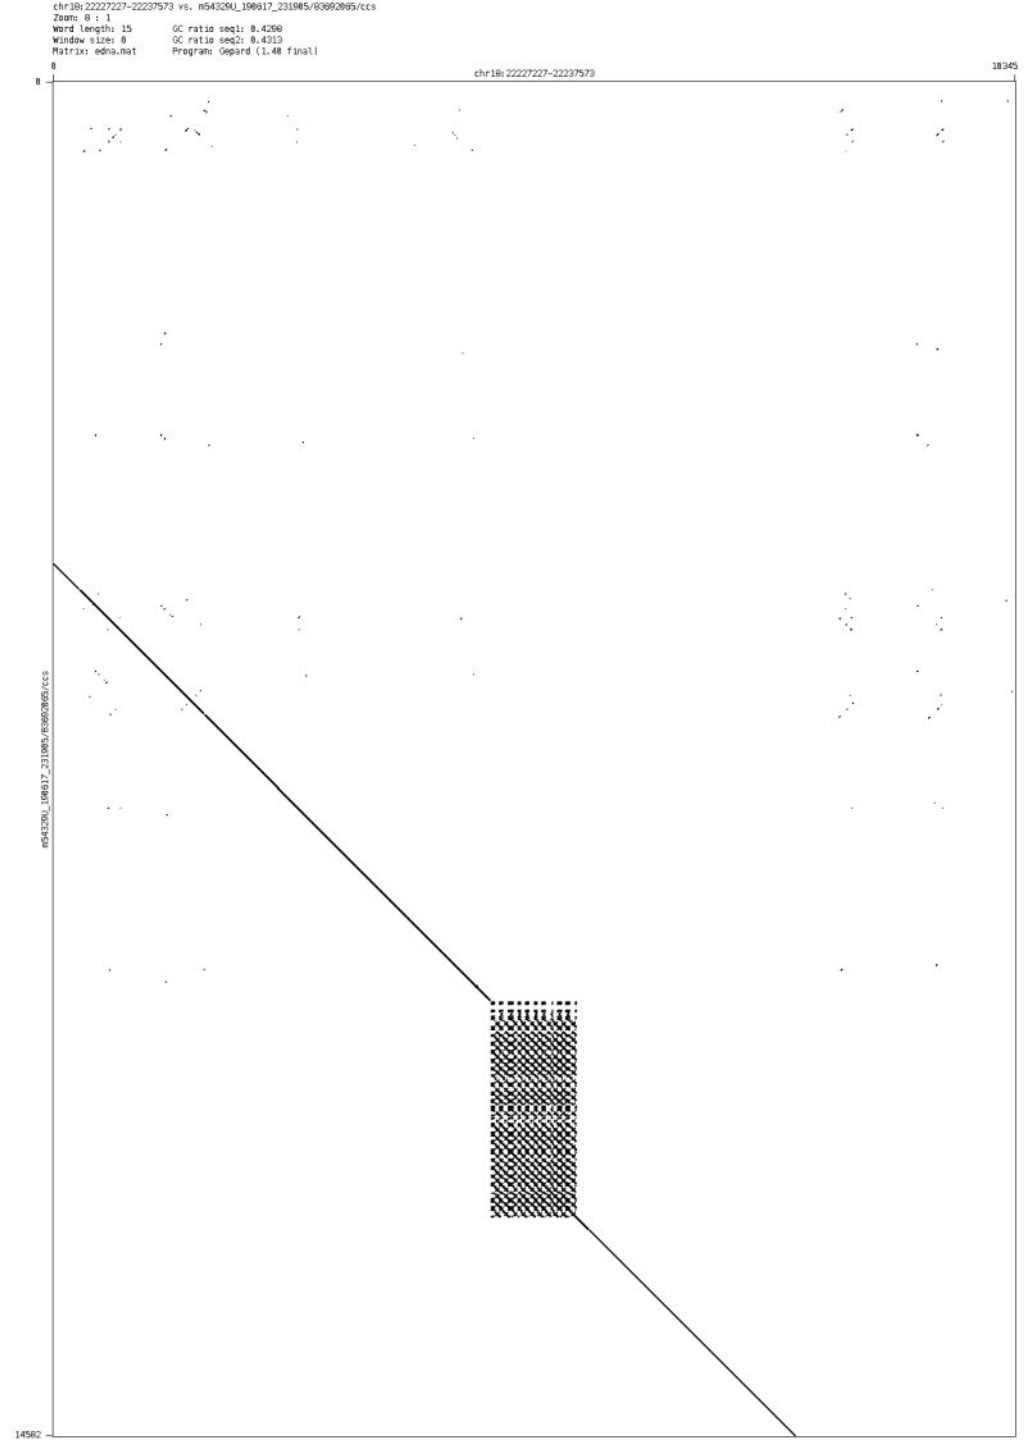

➤ chr18\_36463341\_36463429

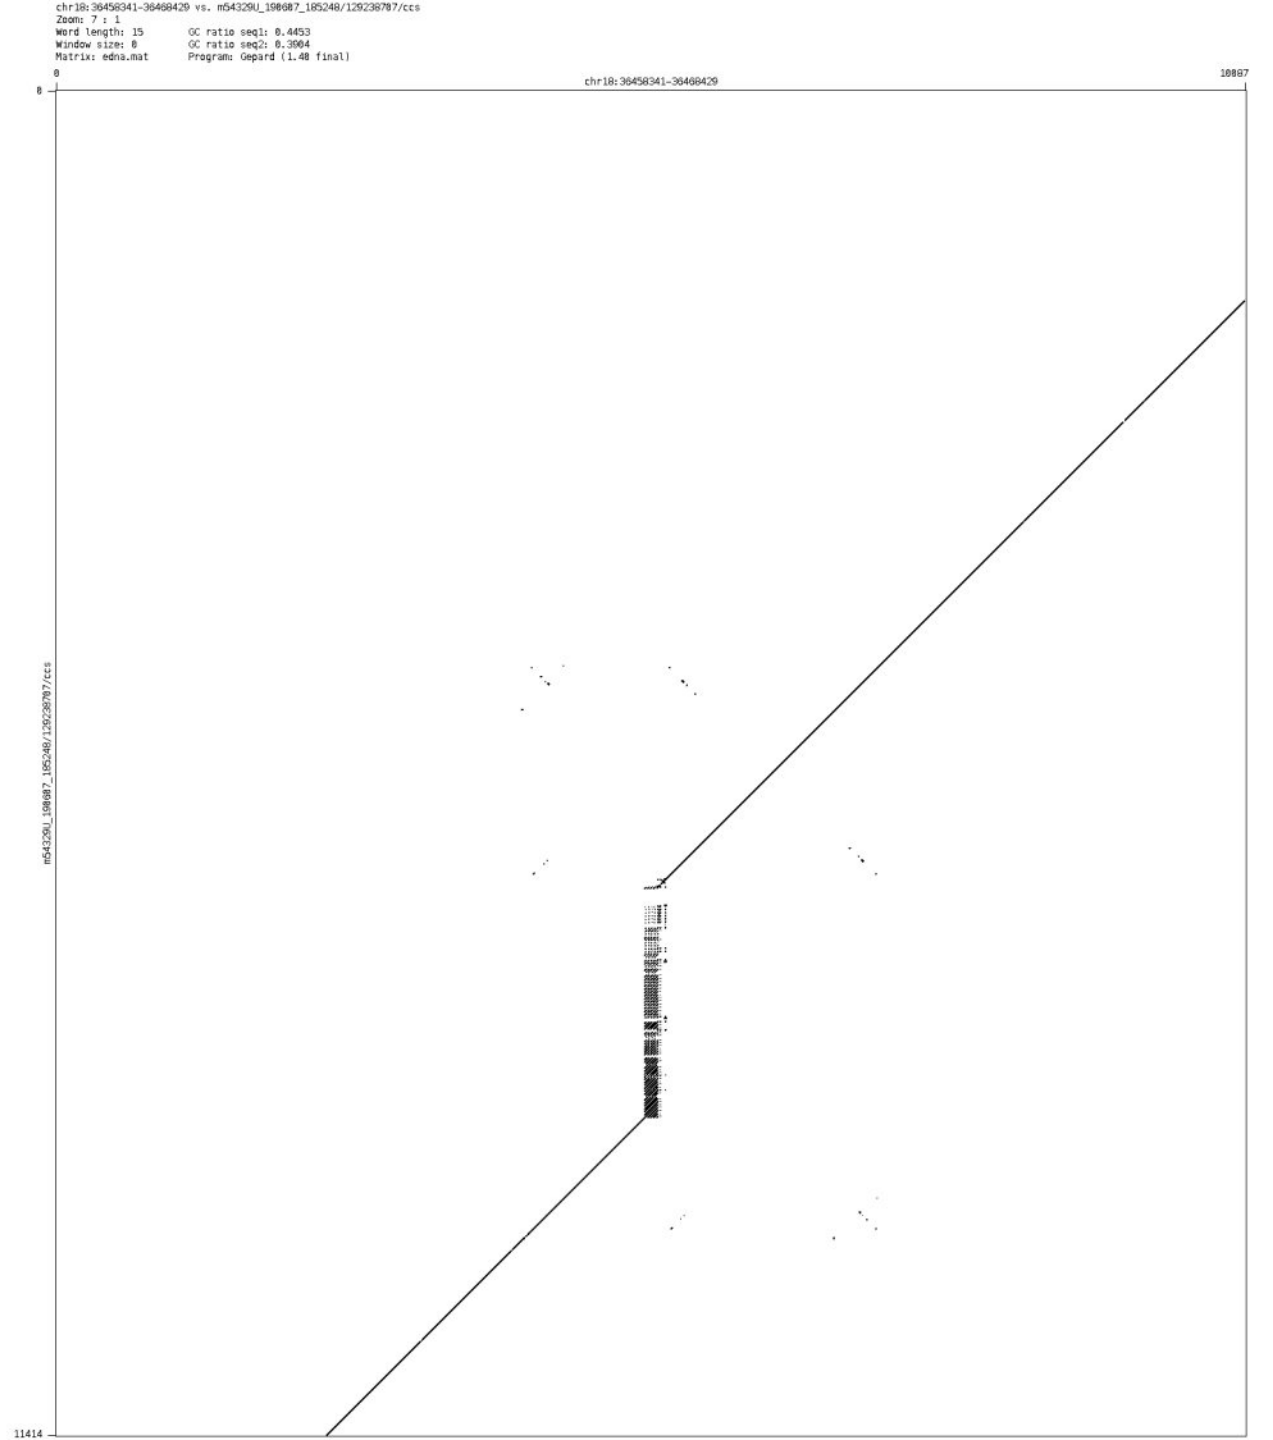

➤ chr18\_49067249\_49067378

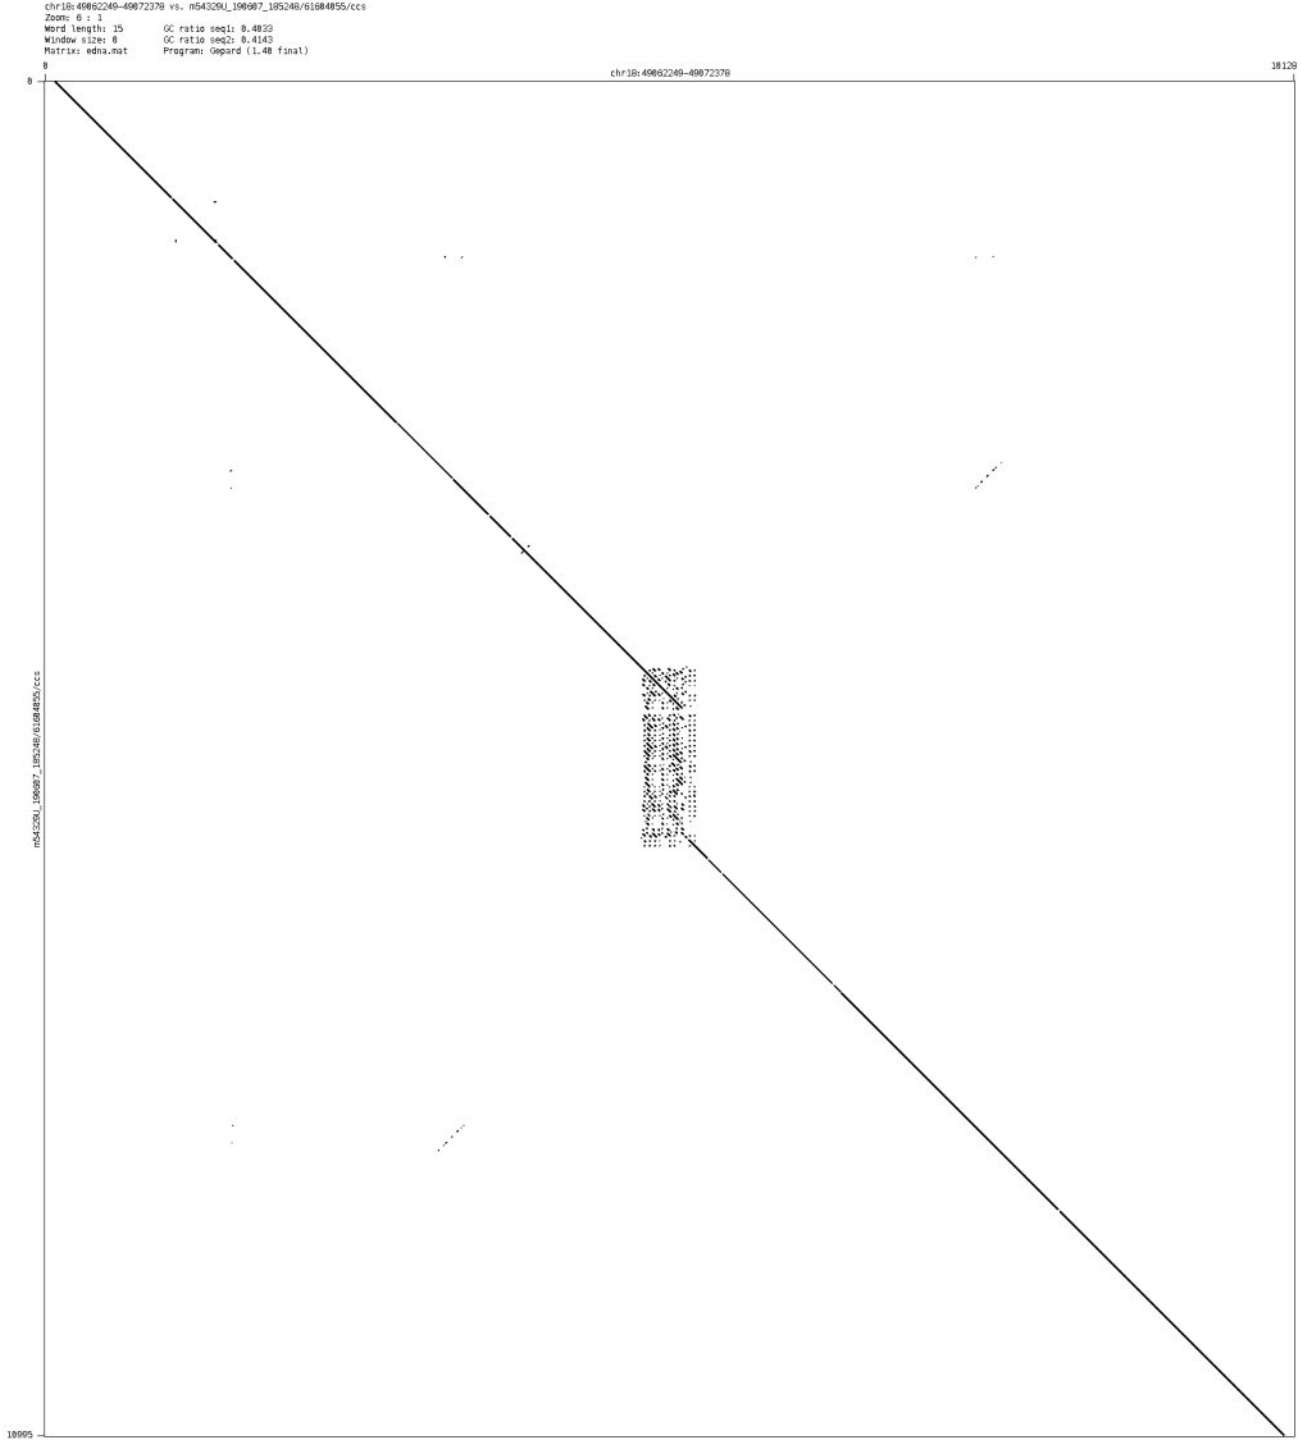



➤ chr18\_72044575\_72045937

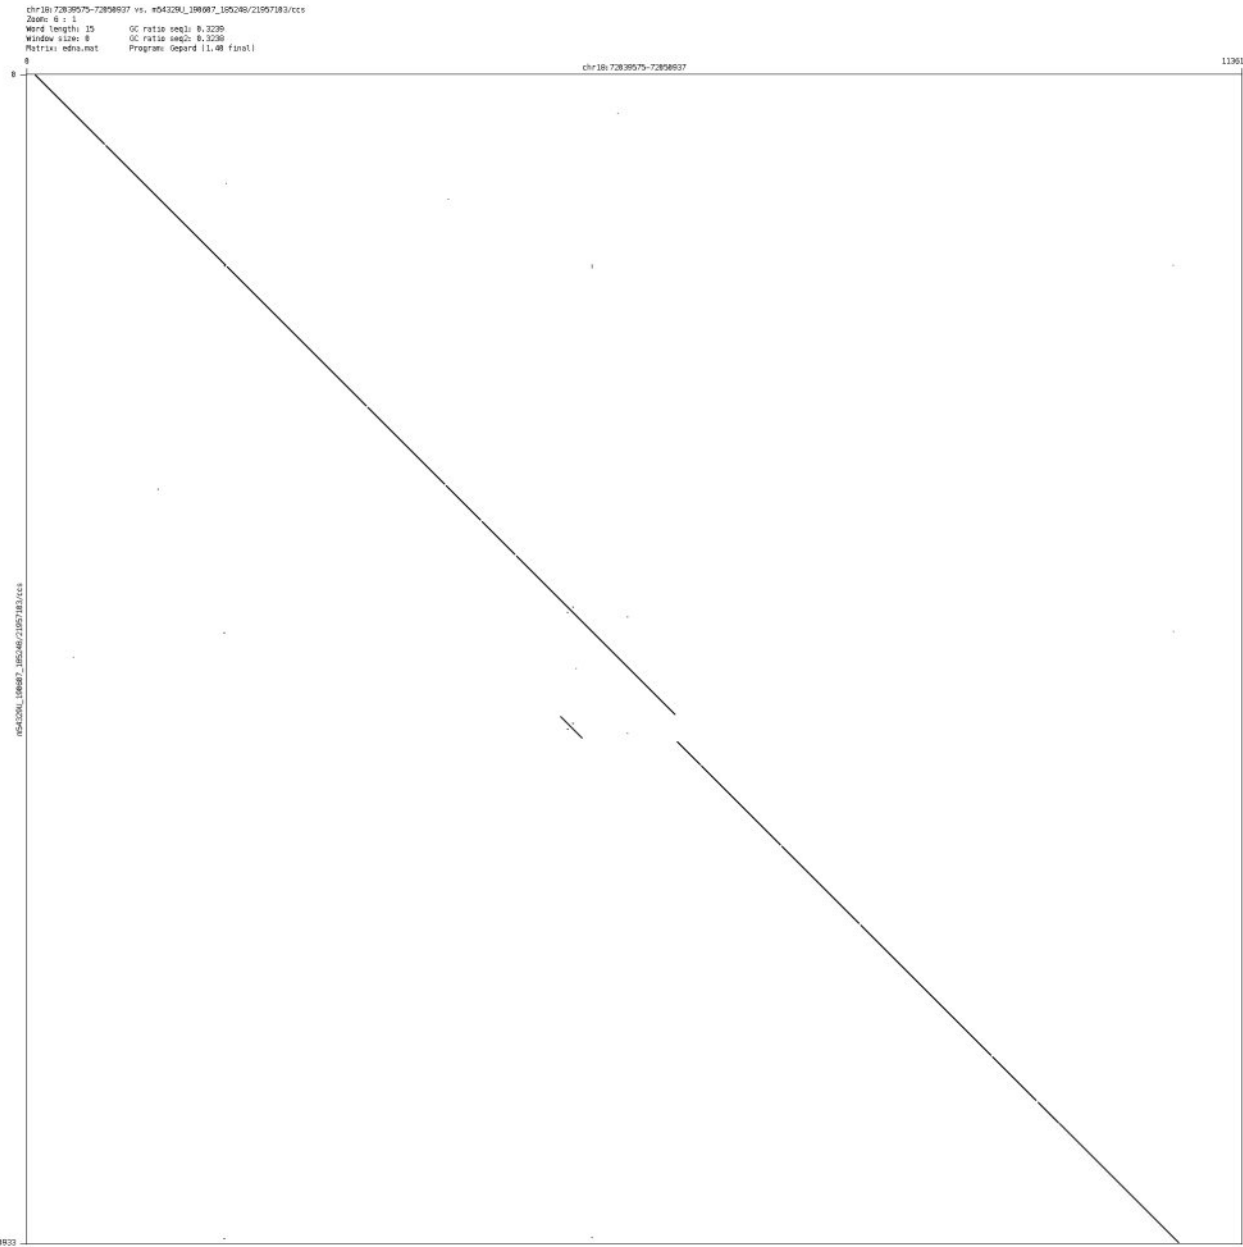

➤ chr18\_74616915\_74617116

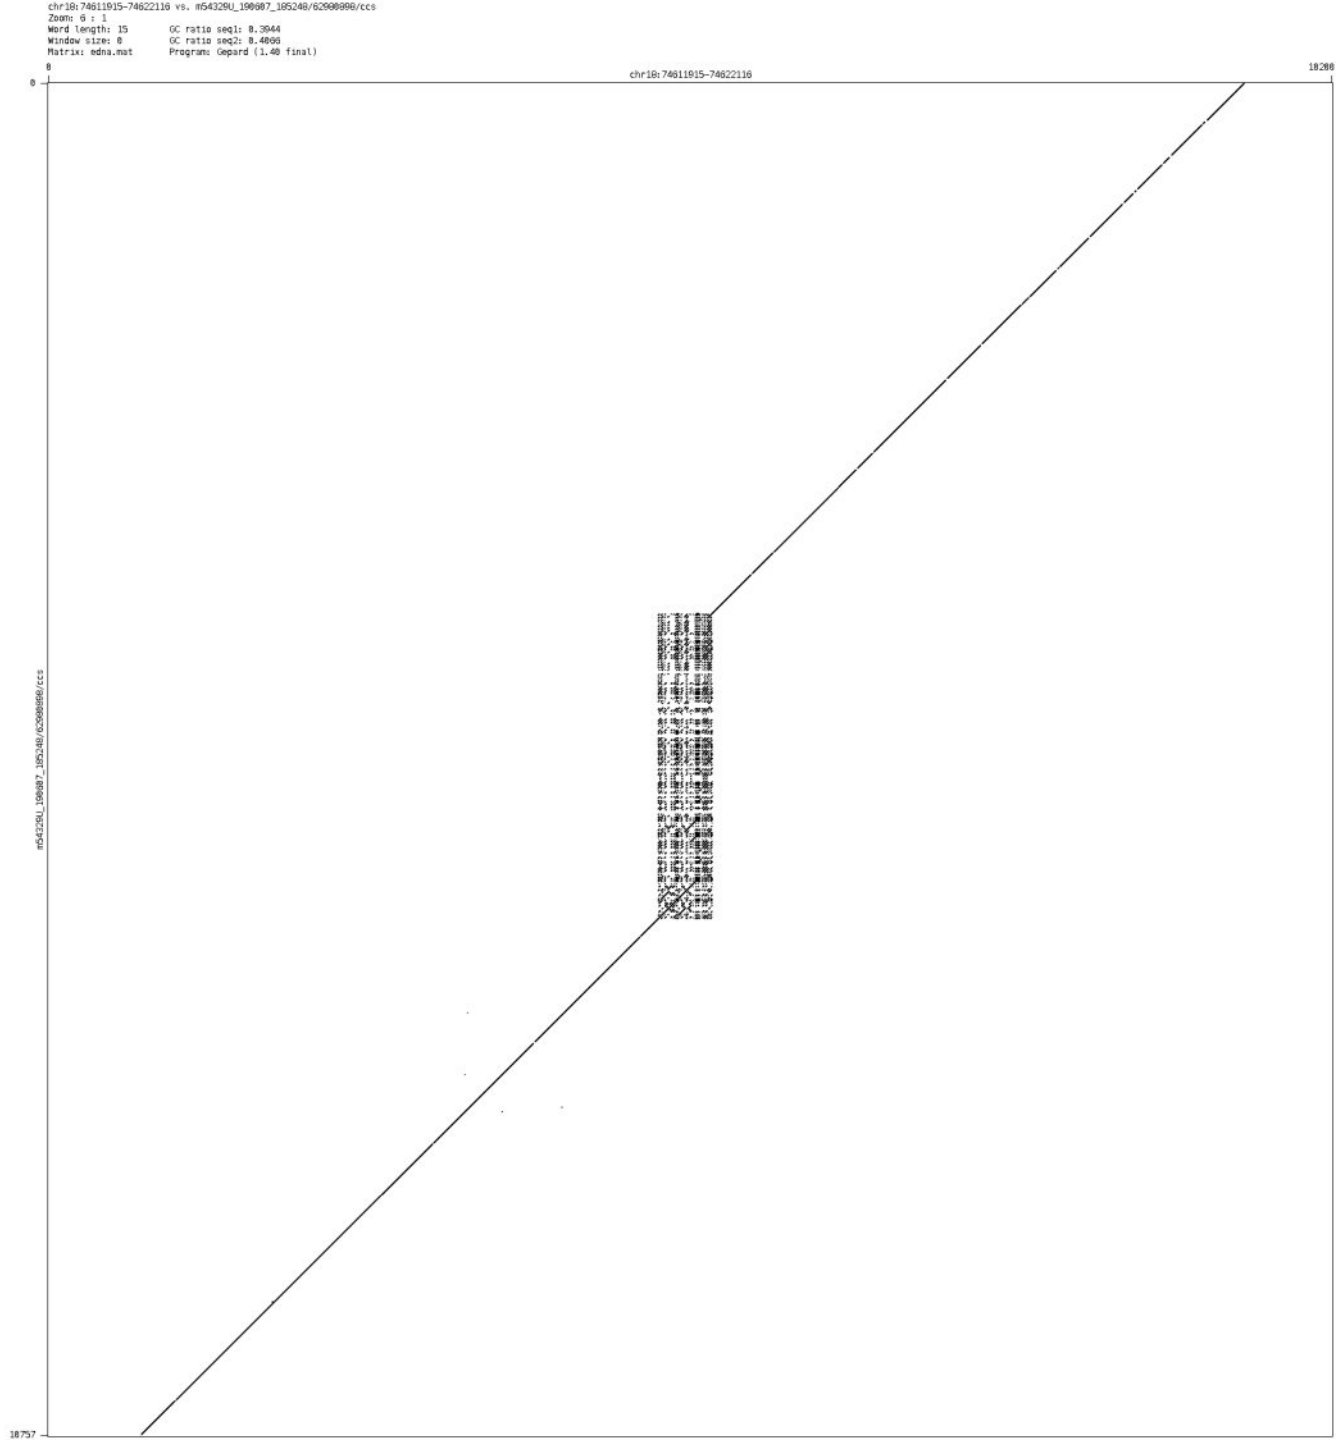

➤ chr18\_76585300\_76586173

chr18:70568388-70591173 vs. rs43250\_199497\_185246/81528996/ccs  
Zscore: 0 : 1      GC ratio seq1: 0.4456  
Word length: 15      GC ratio seq2: 0.4415  
Window size: 8  
Matrix: edna.mat      Program: Gepard (1.48 final)

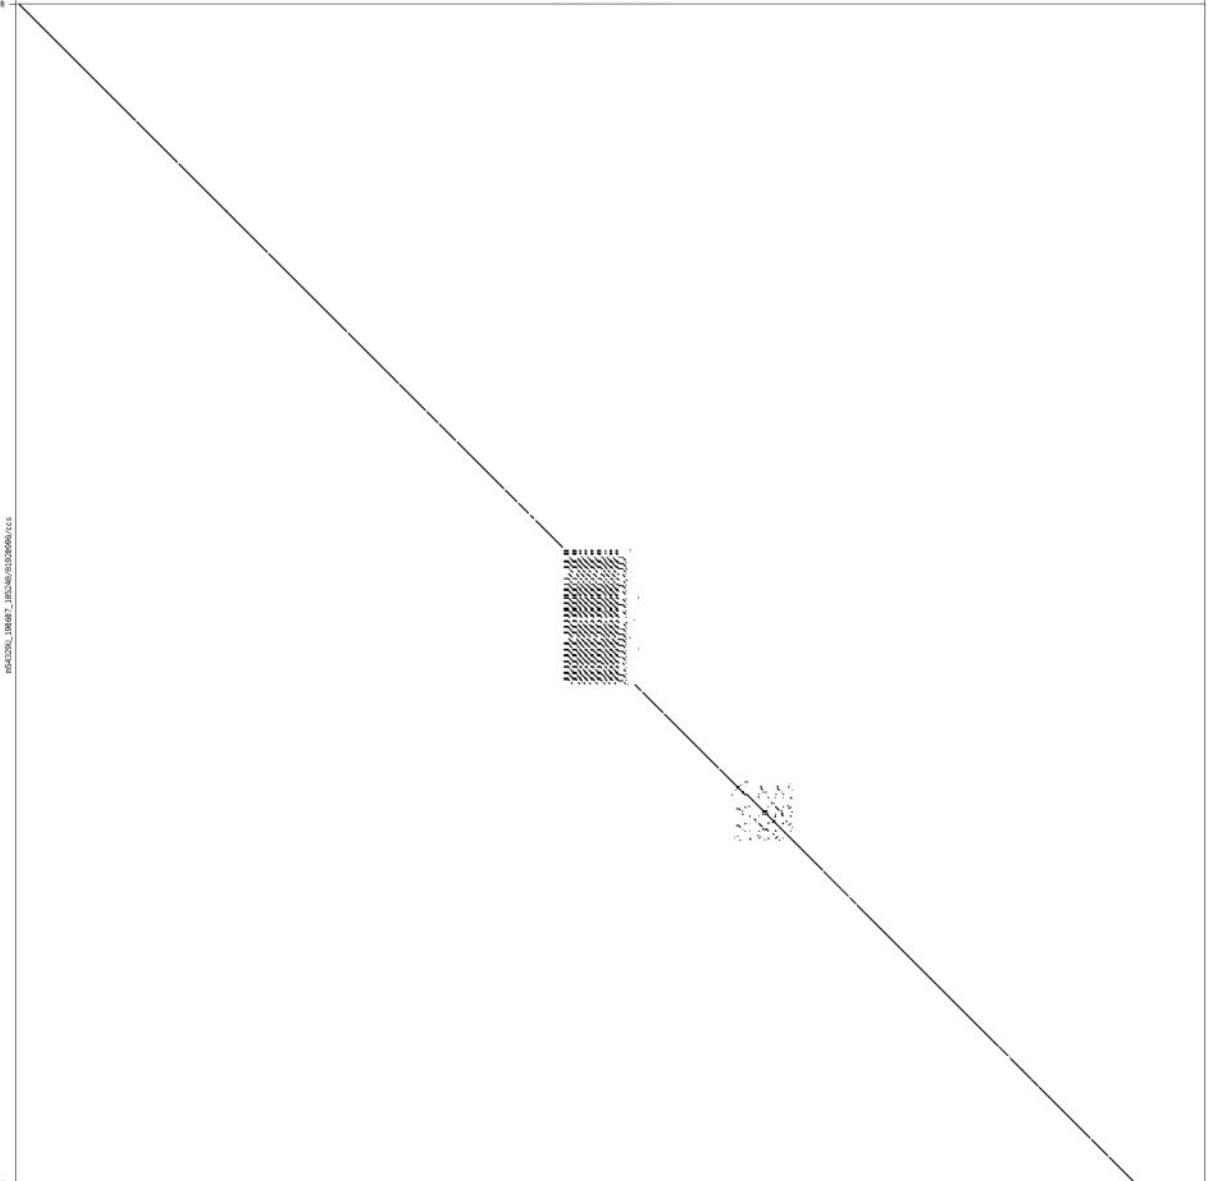

➤ chr18\_76967411\_76967555

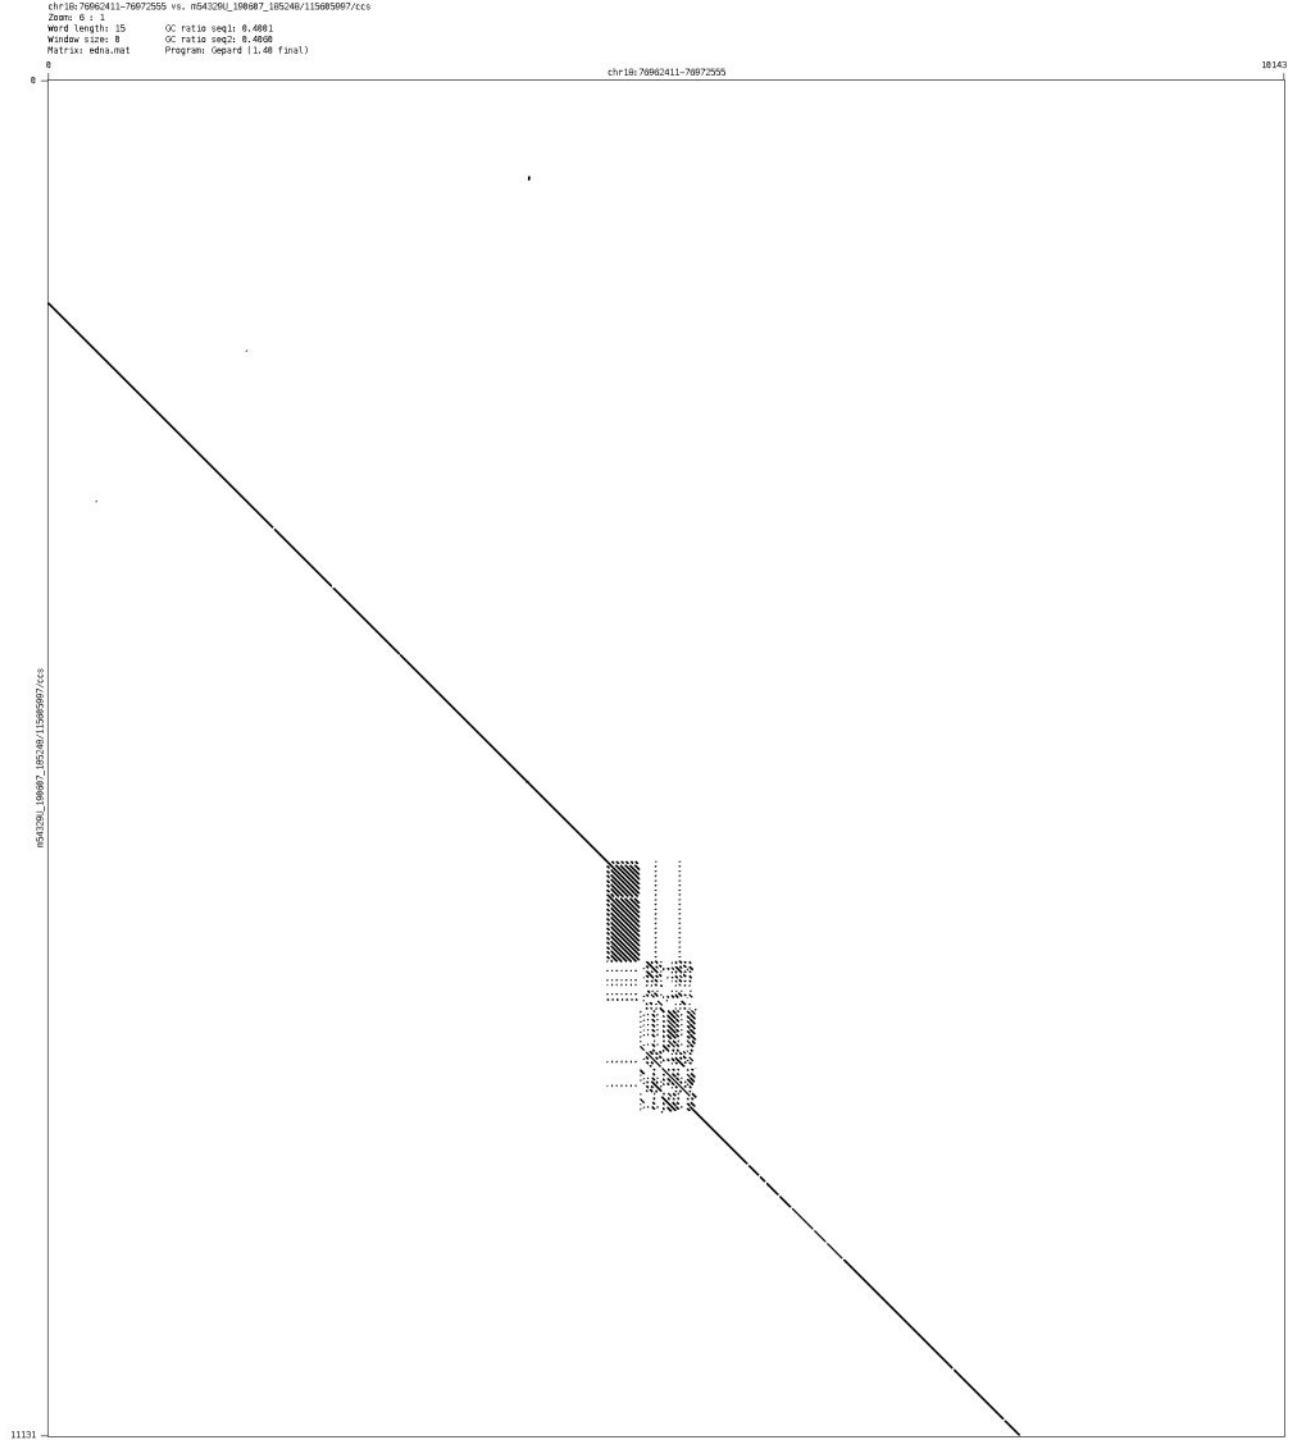

➤ chr18\_78010192\_78010318

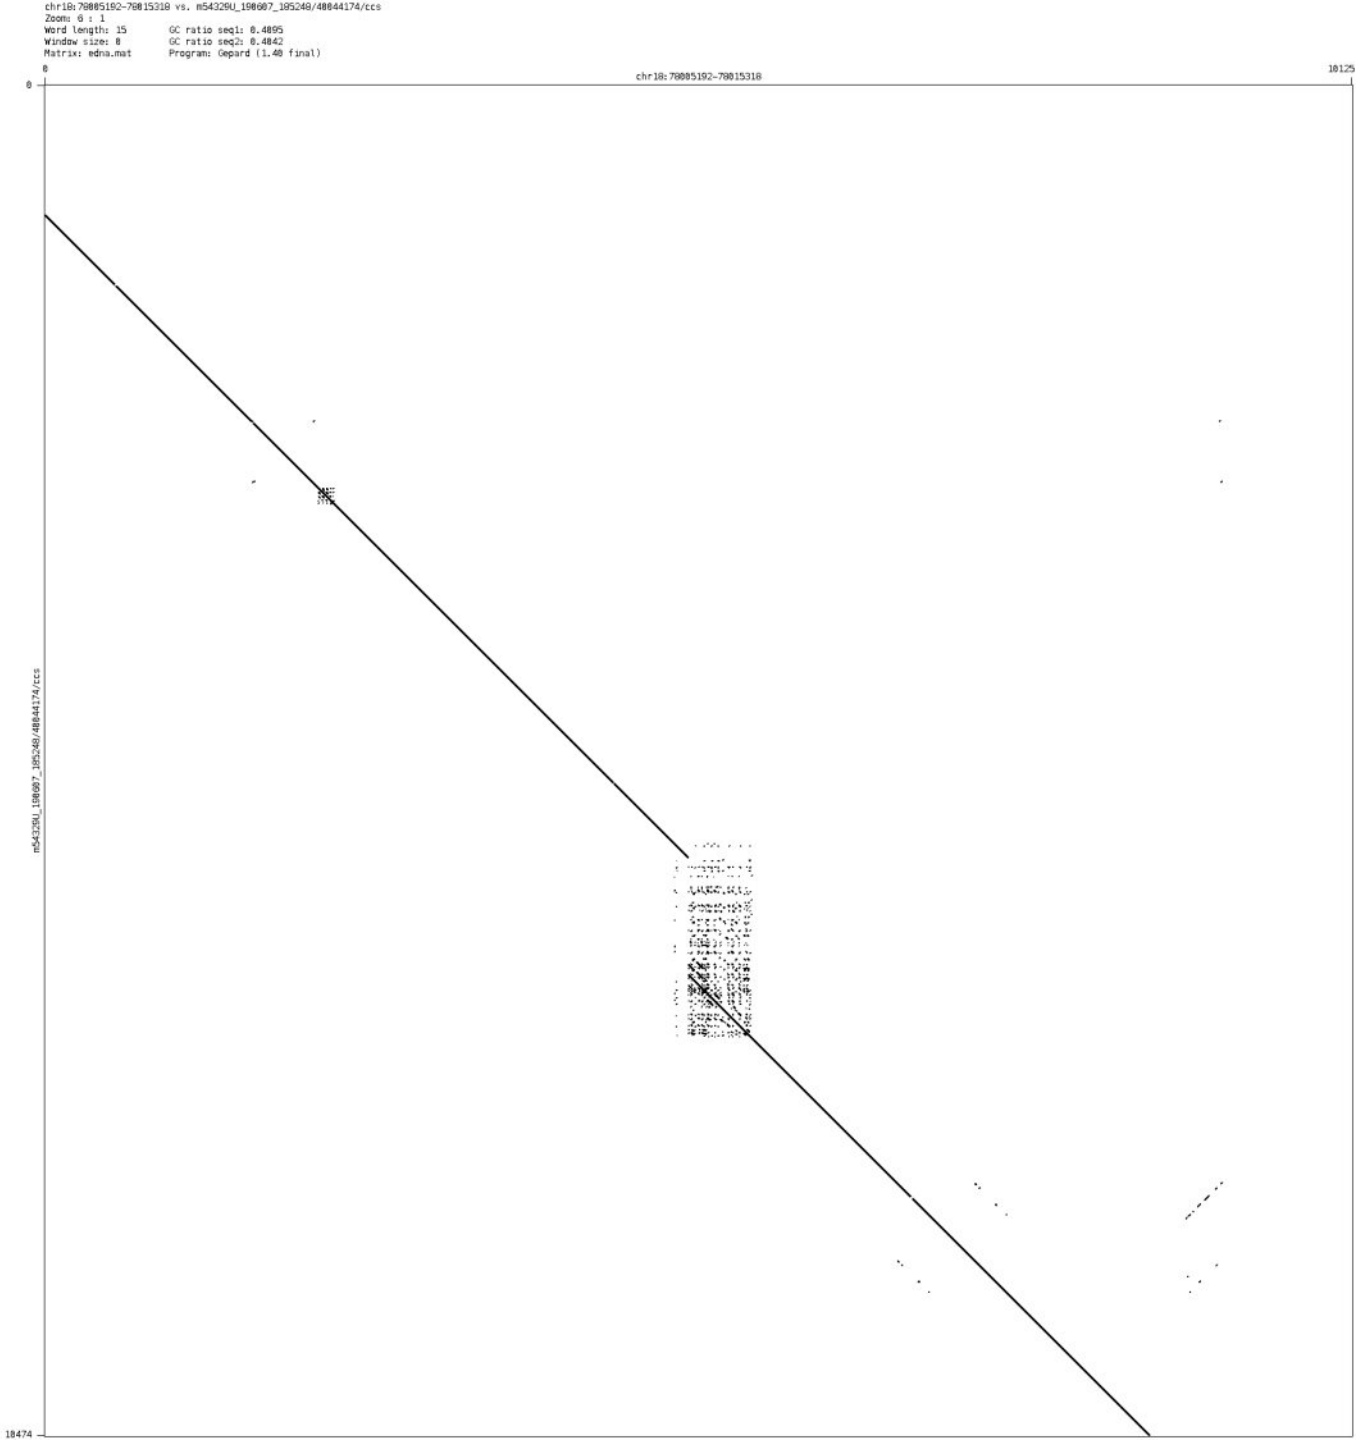

➤ chr18\_78238512\_78238581

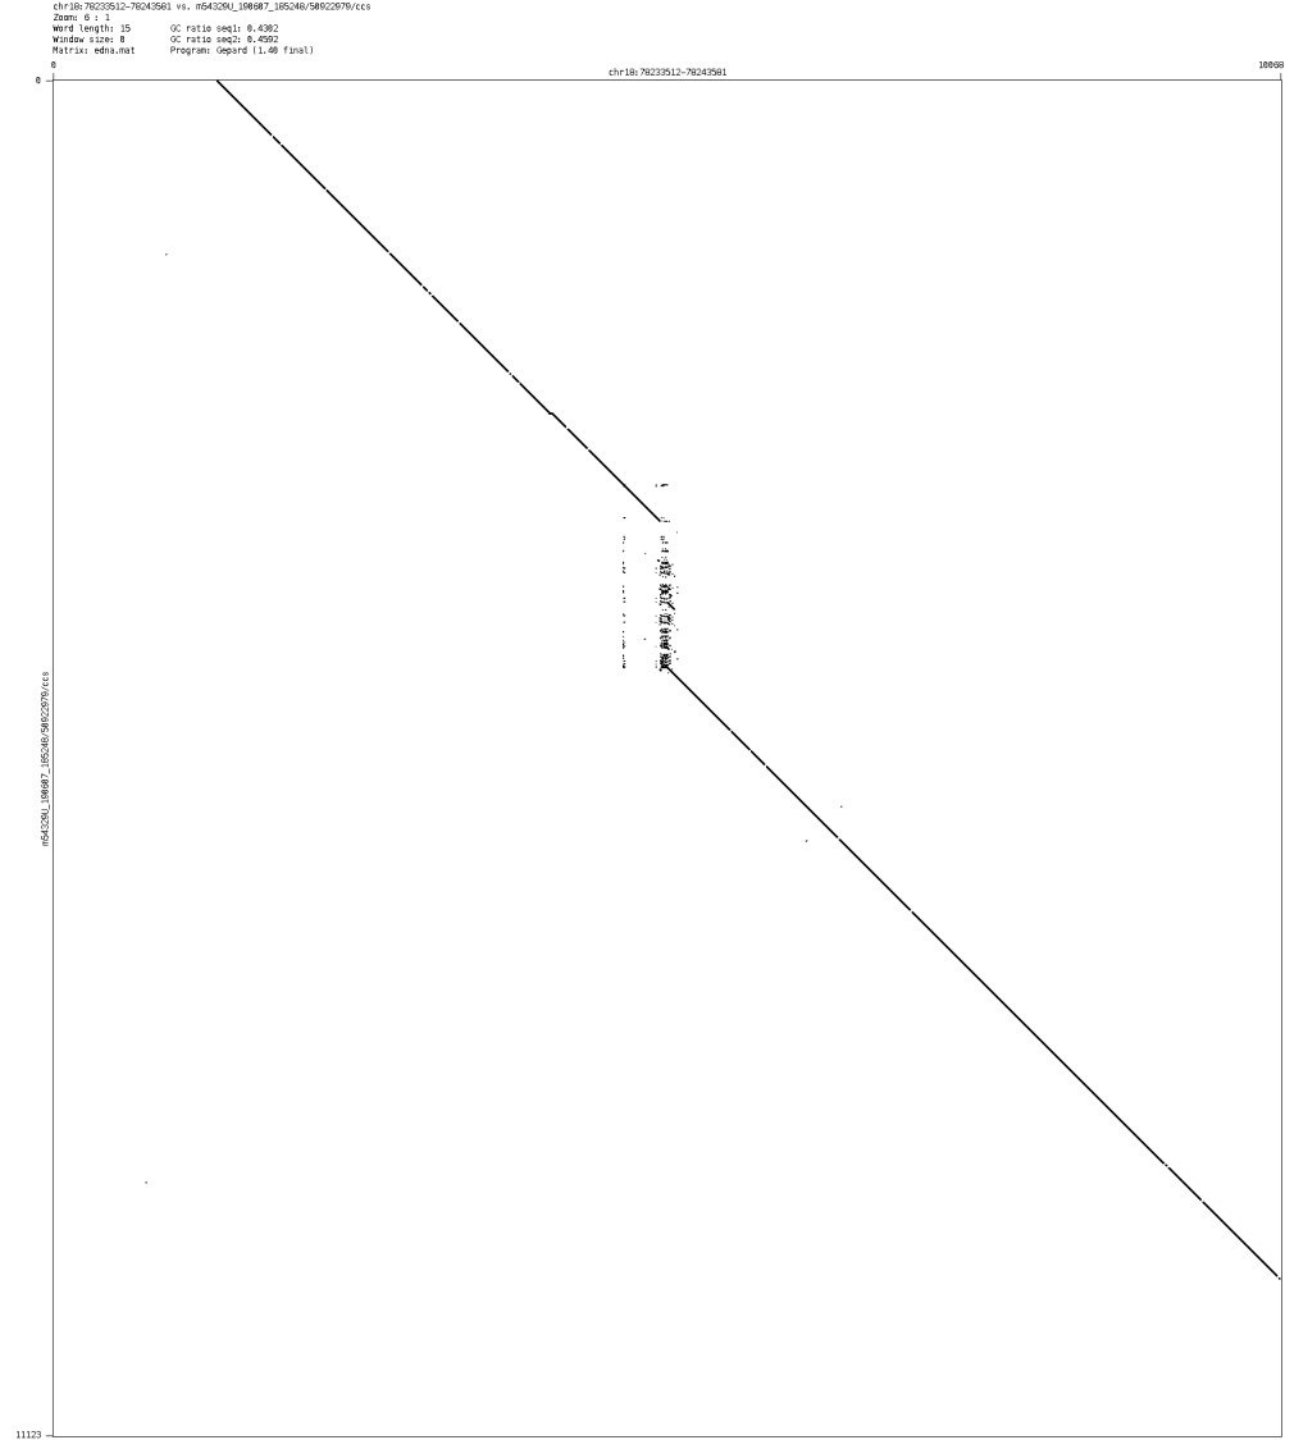

➤ chr18\_79200704\_79200757

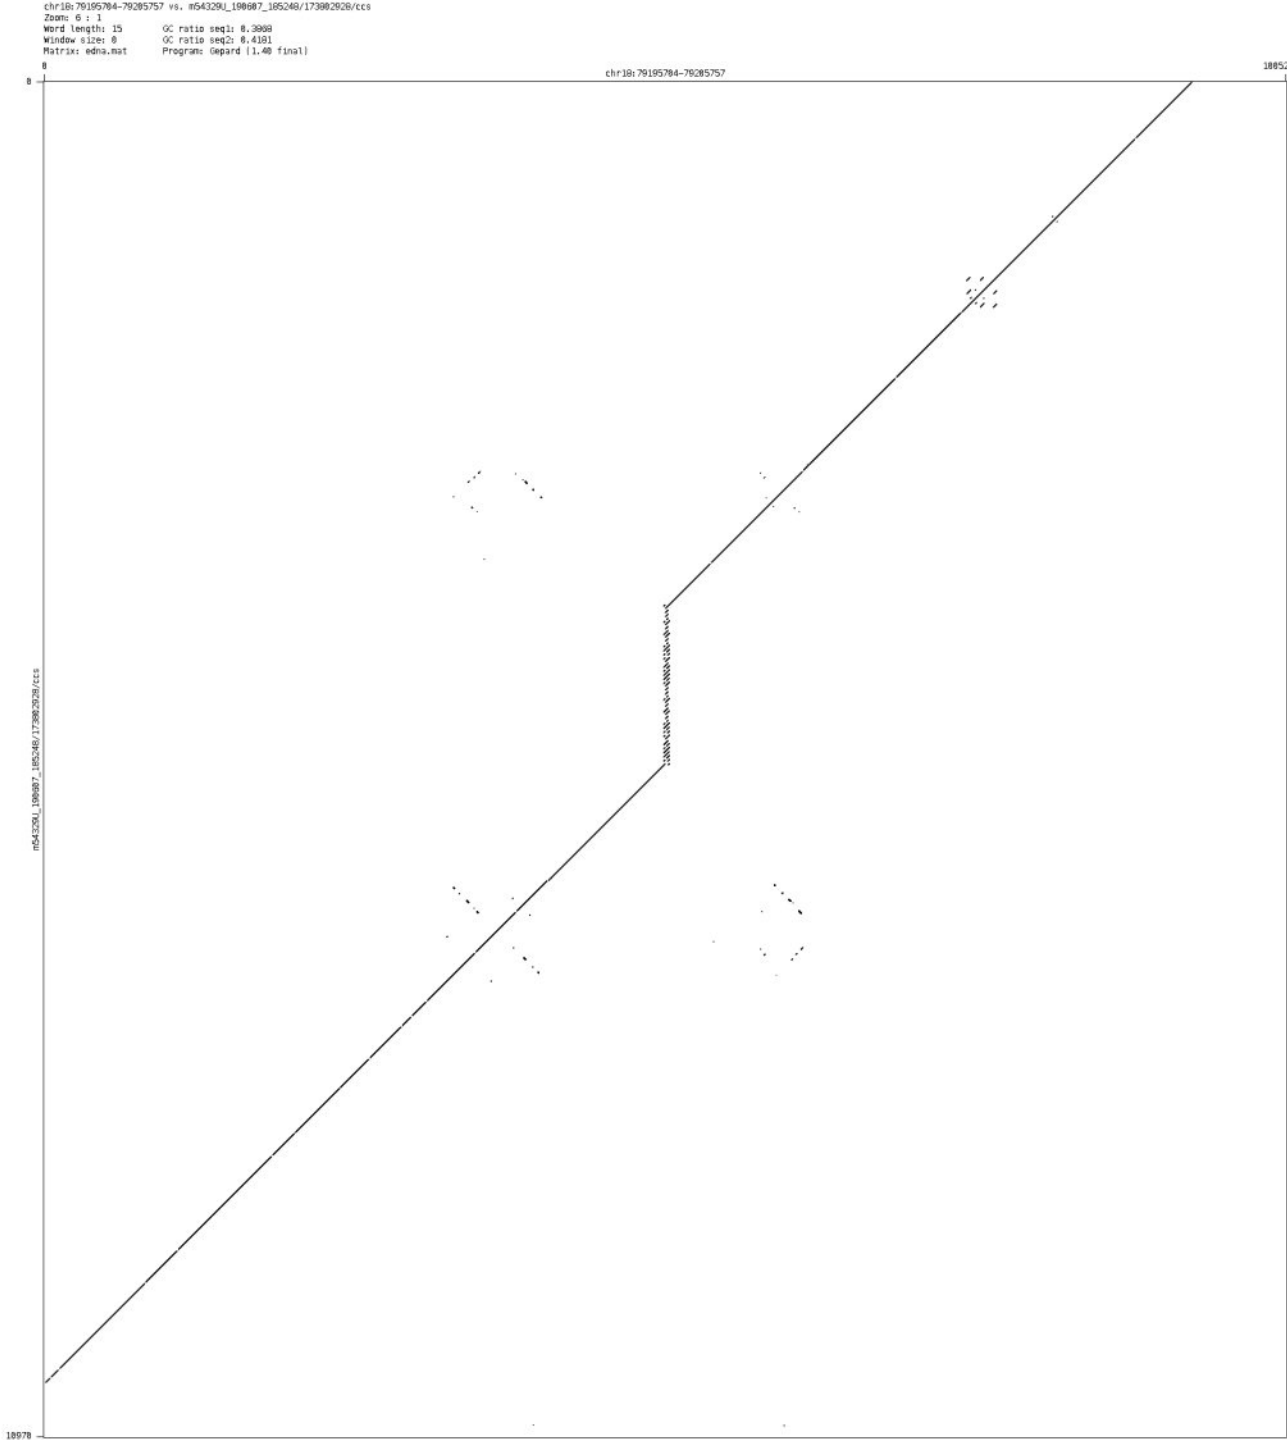

➤ chr19\_350906\_351902

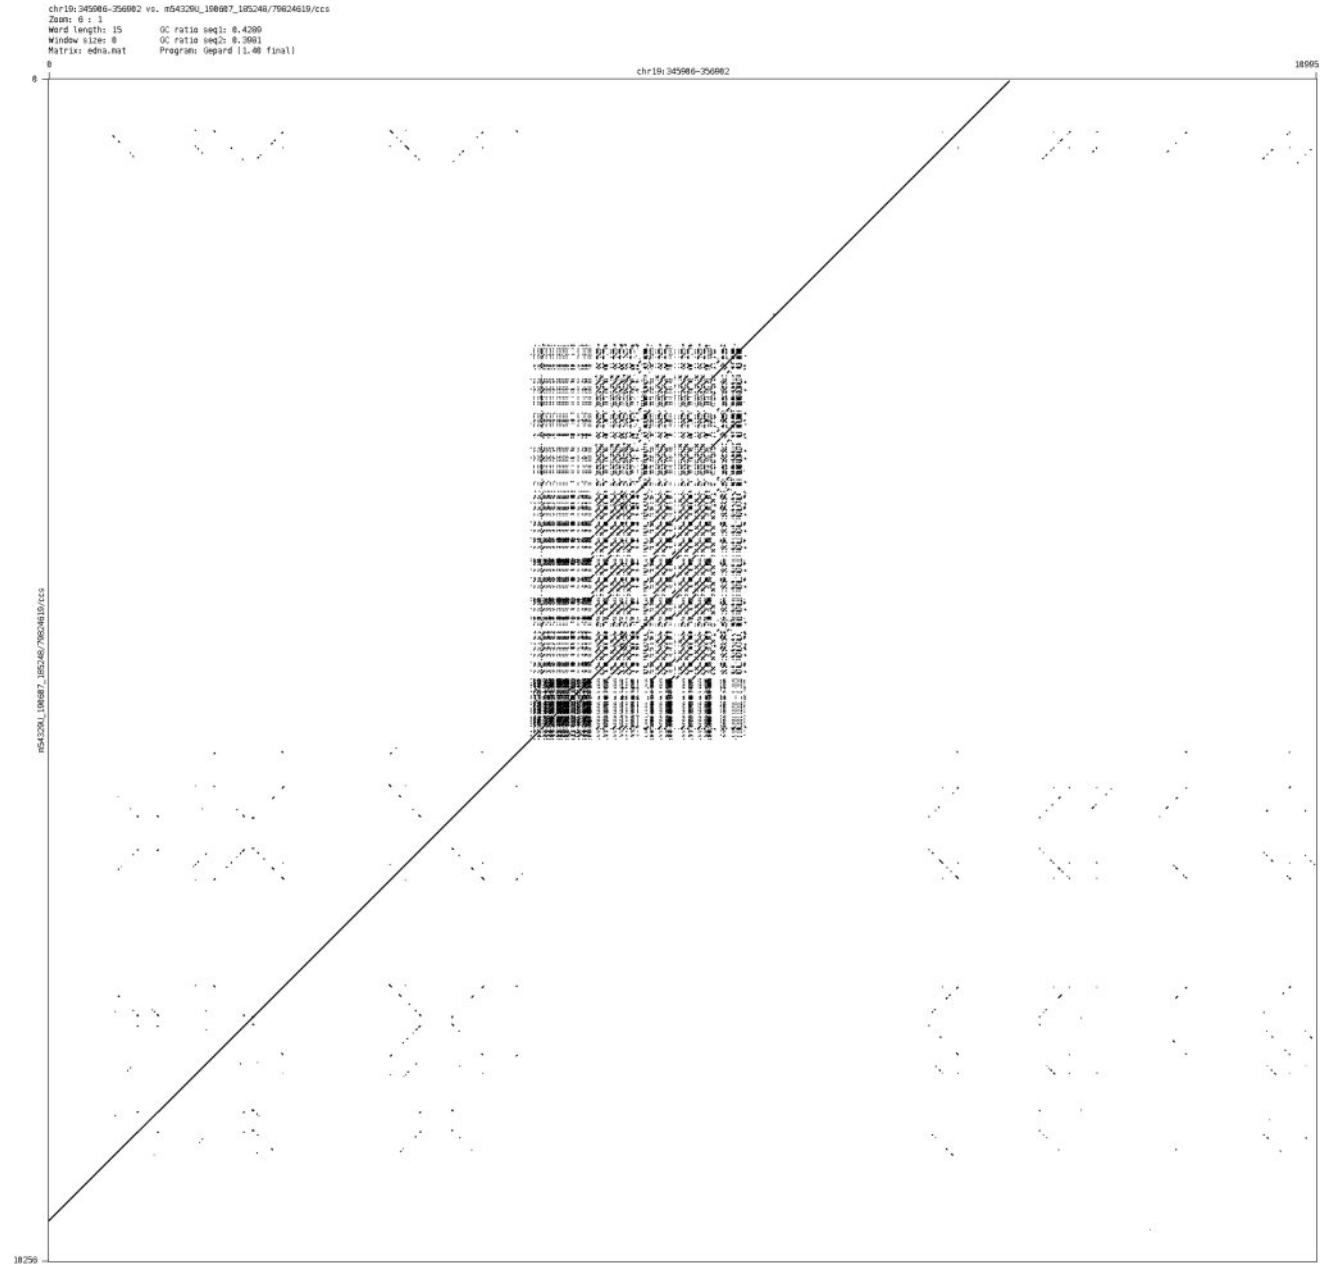



➤ chr19\_835416\_835497

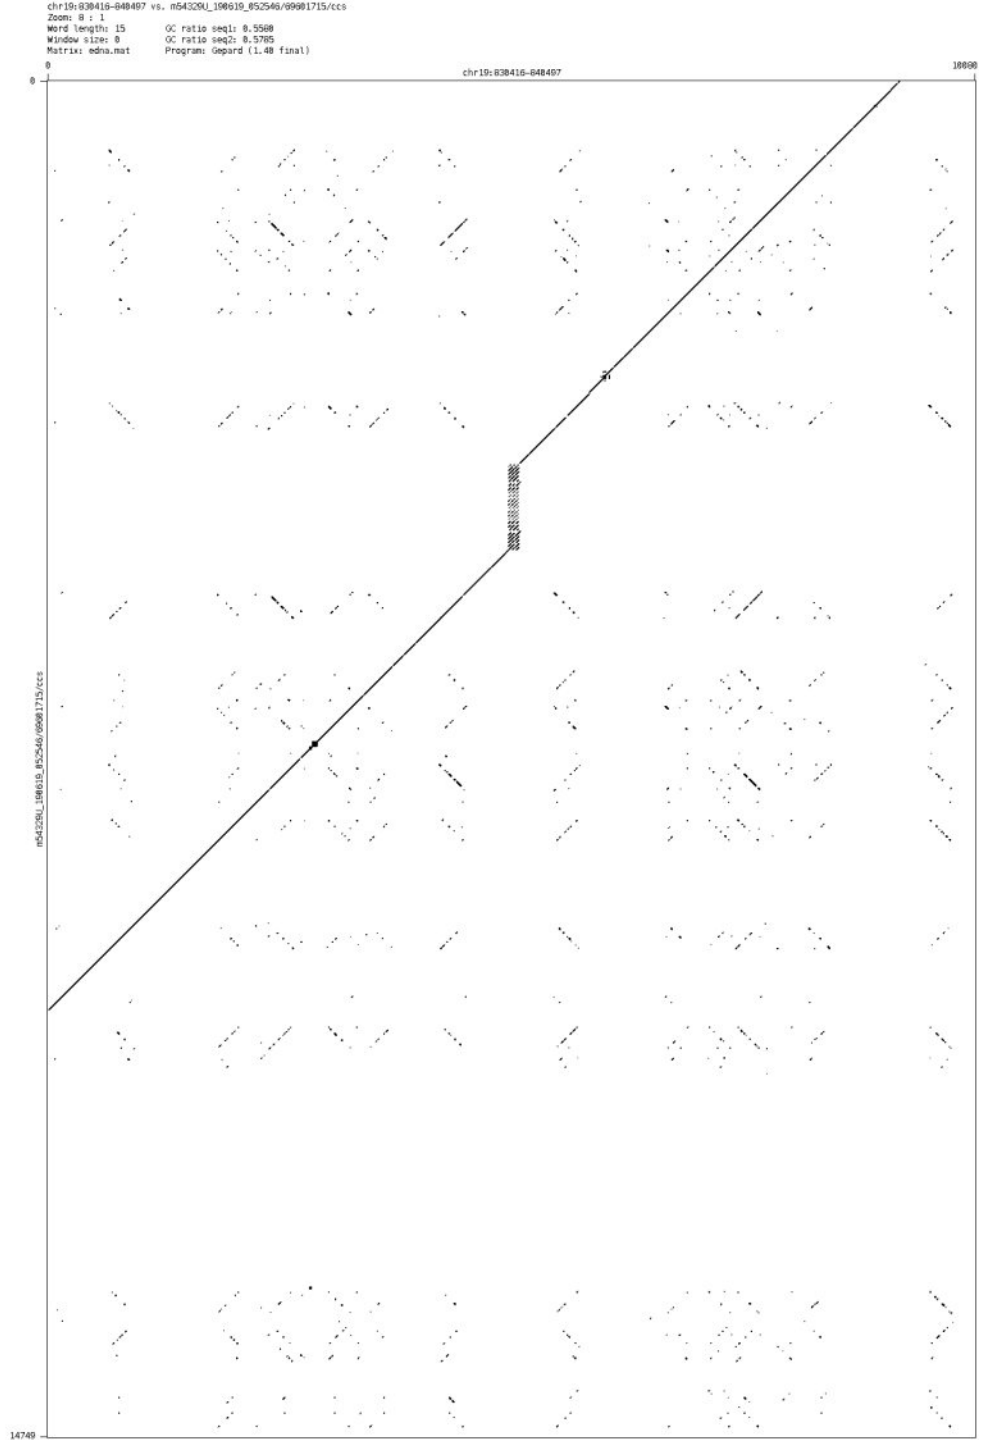

➤ chr19\_879672\_879791

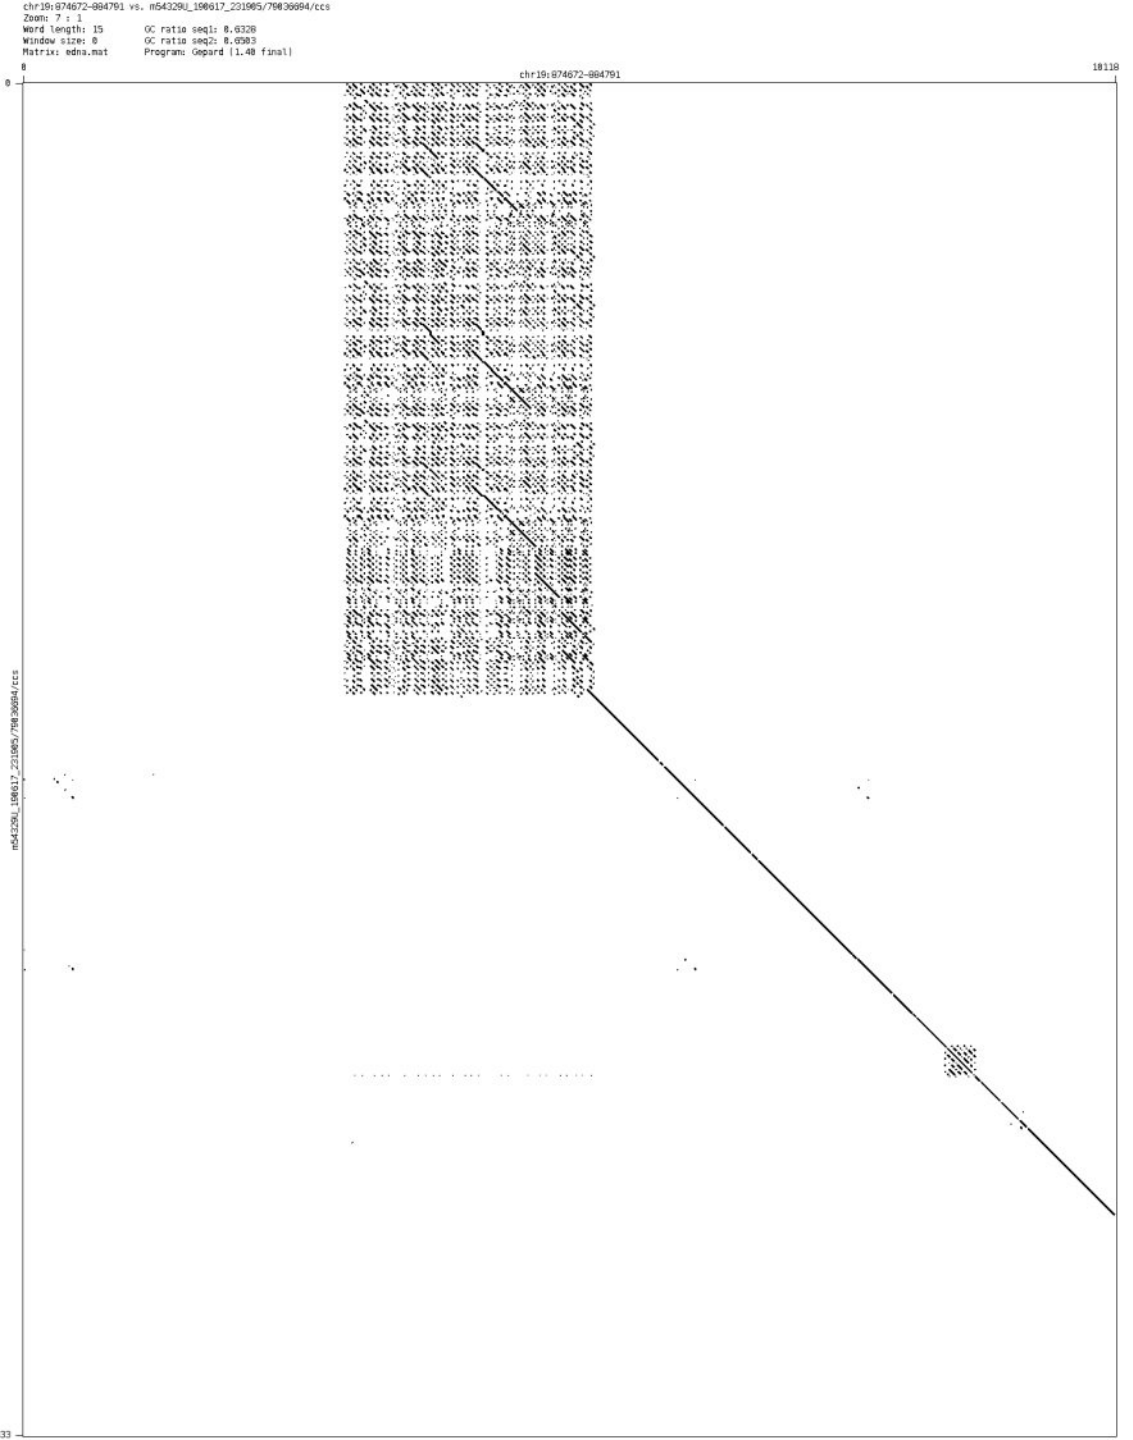

➤ chr19\_1142124\_1142241

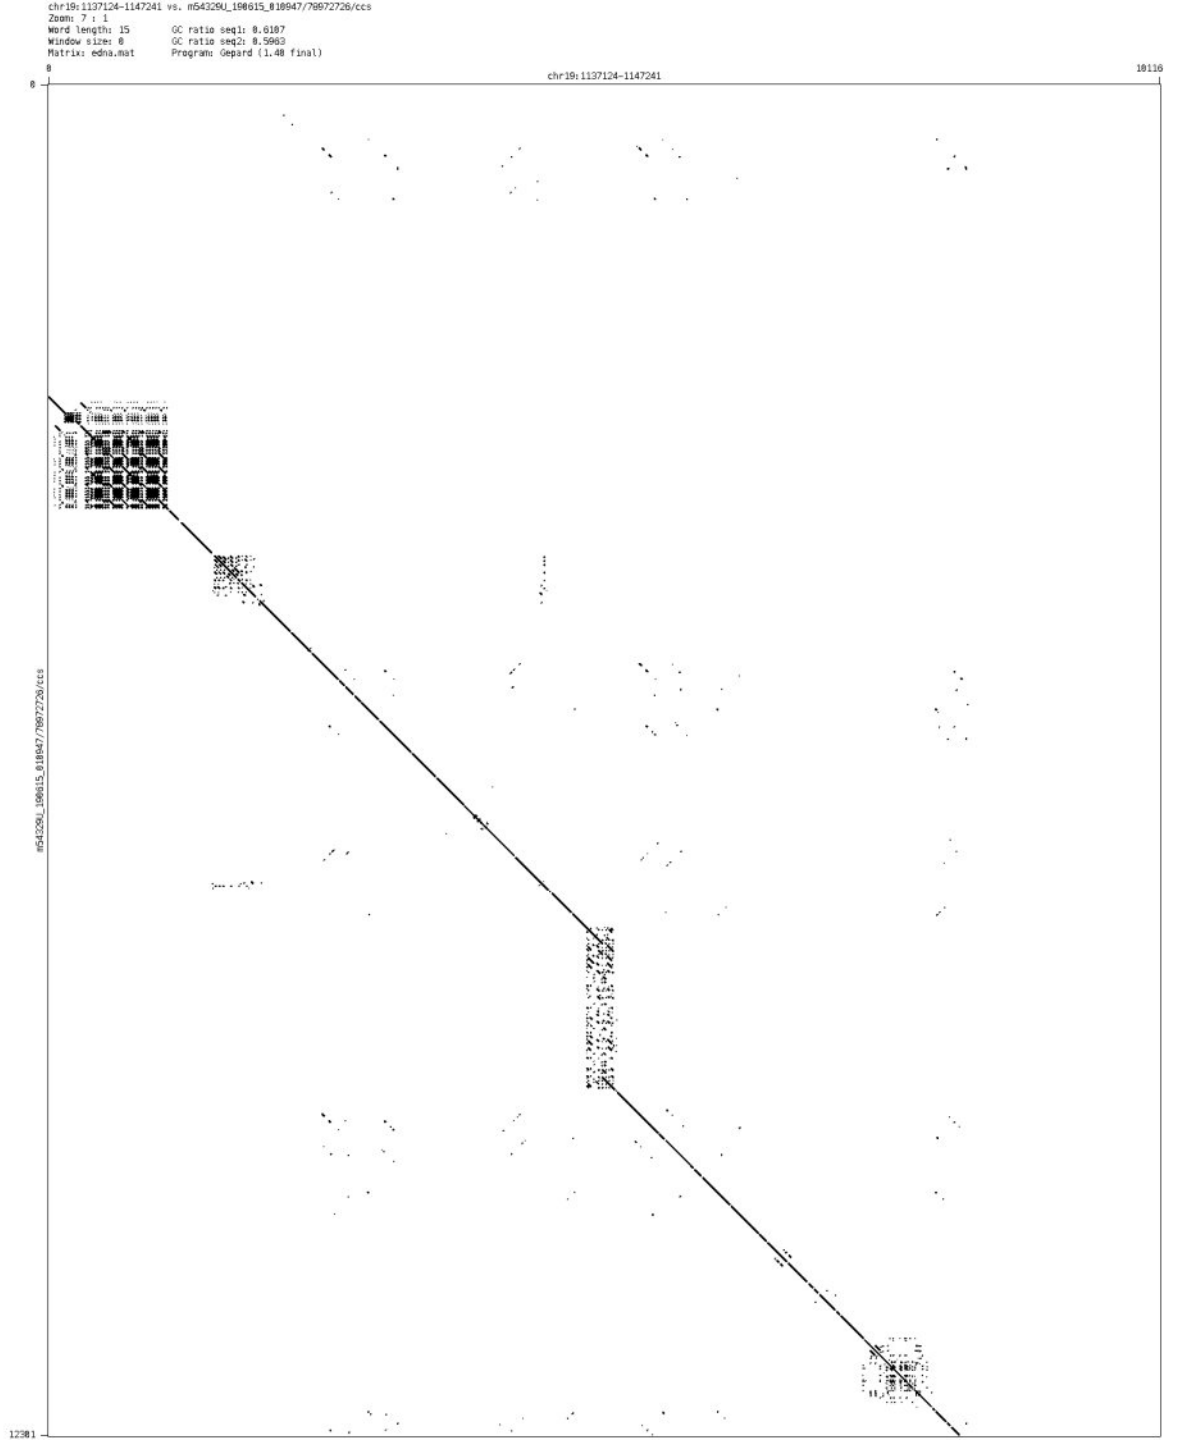

➤ chr19\_1164394\_1166232

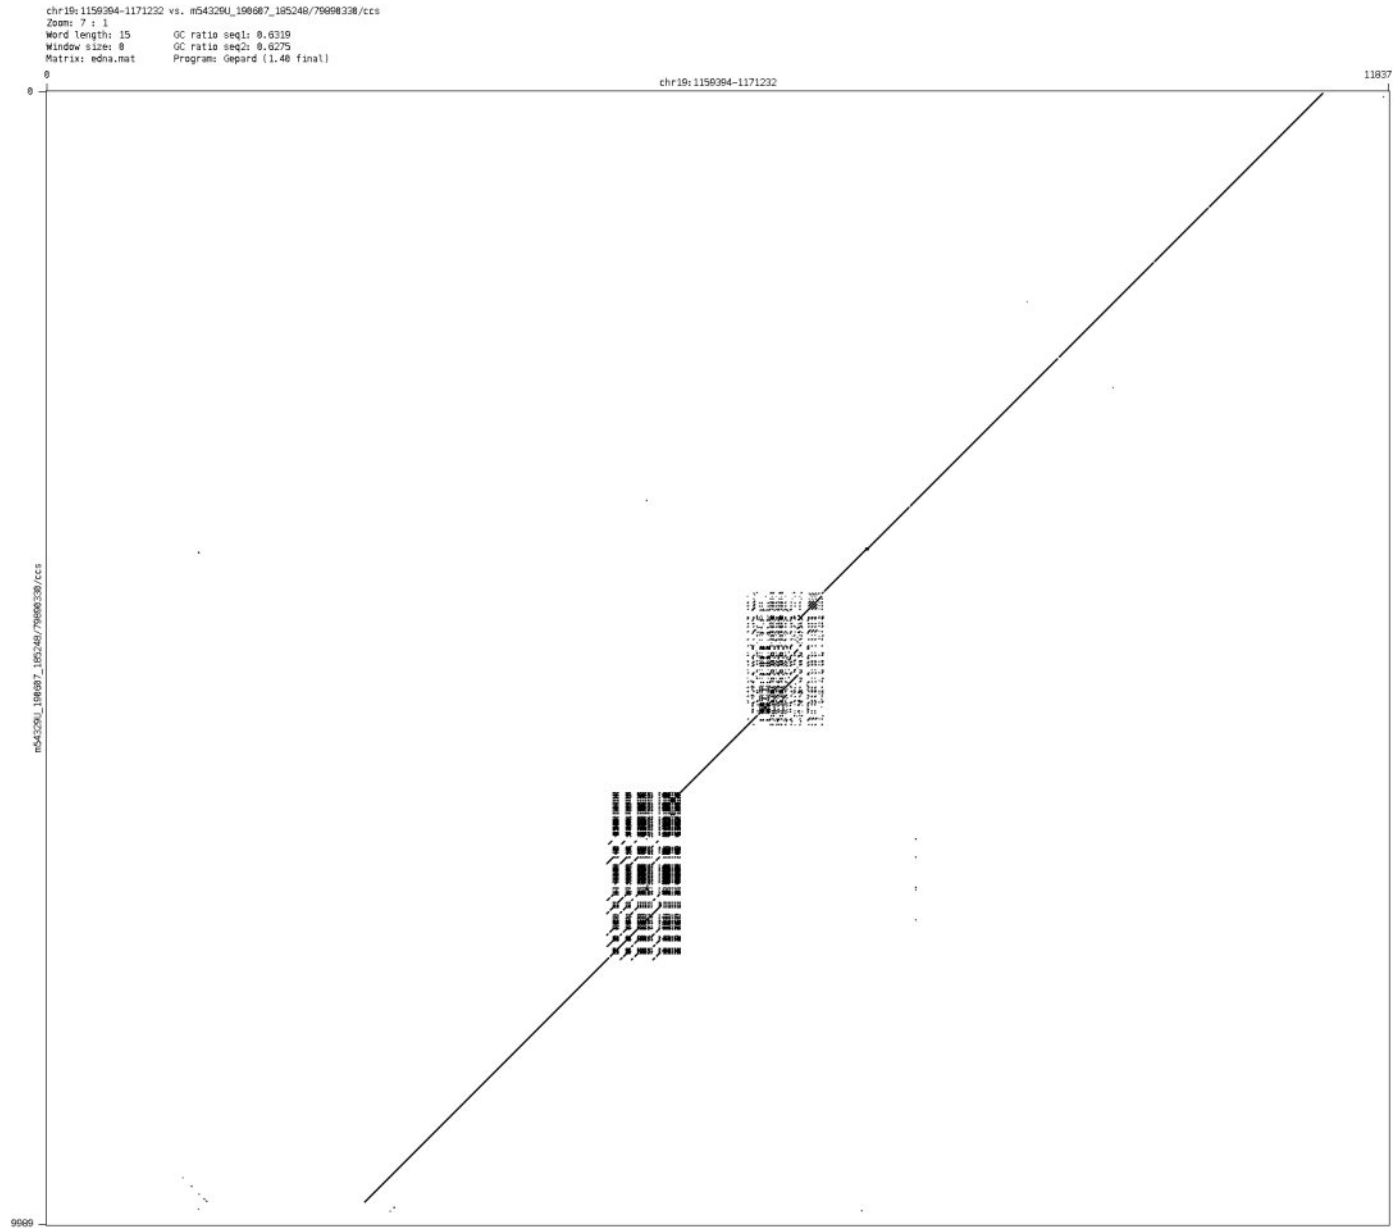

➤ chr19\_3332439\_3332577

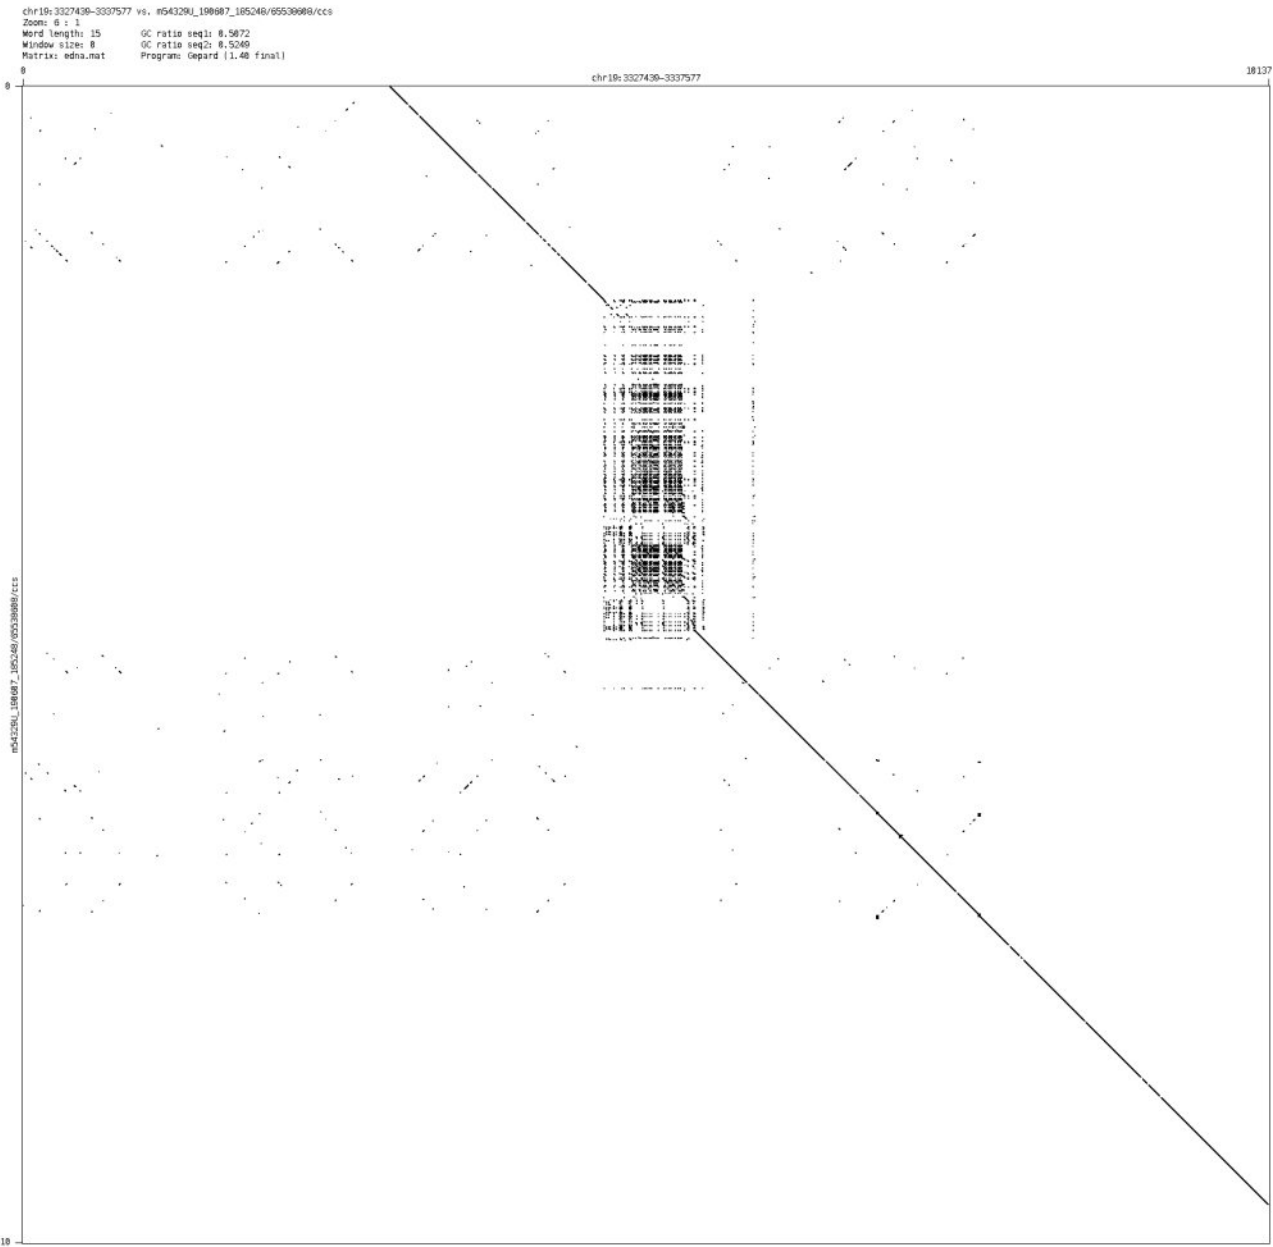

➤ chr19\_4035778\_4035935

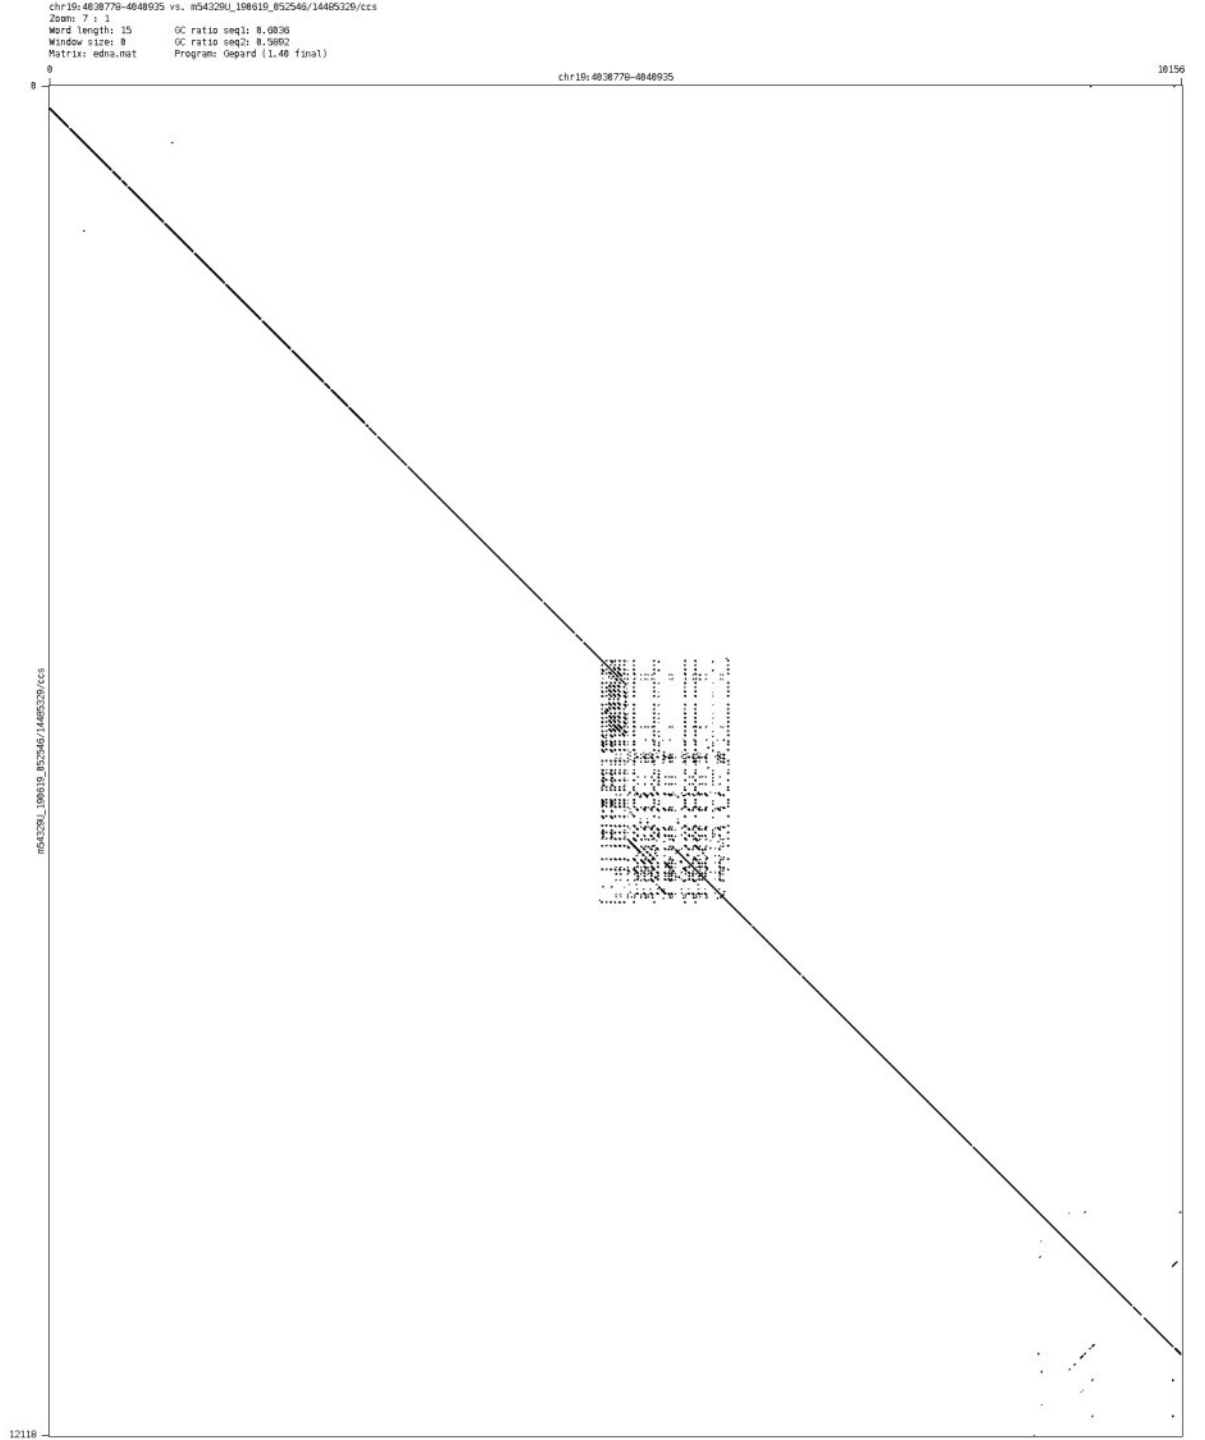

➤ chr19\_6070065\_6070188

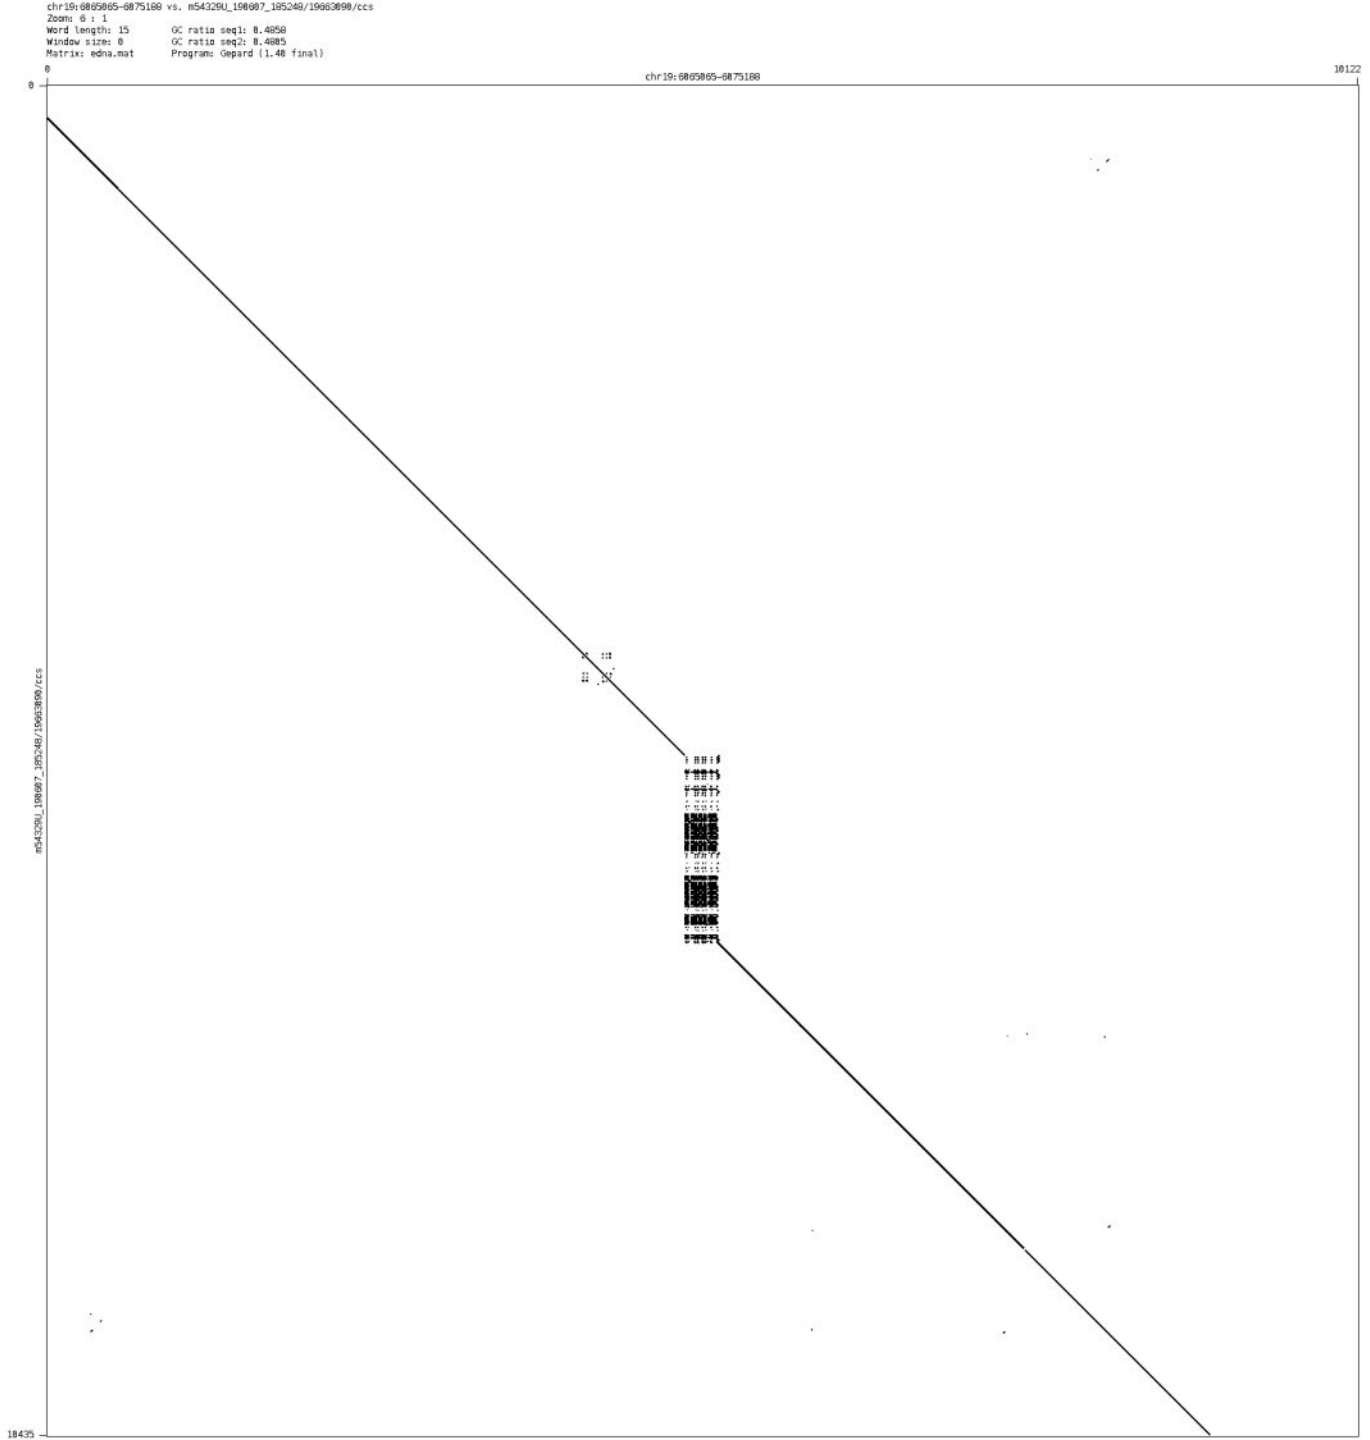

➤ chr19\_7153130\_7153347

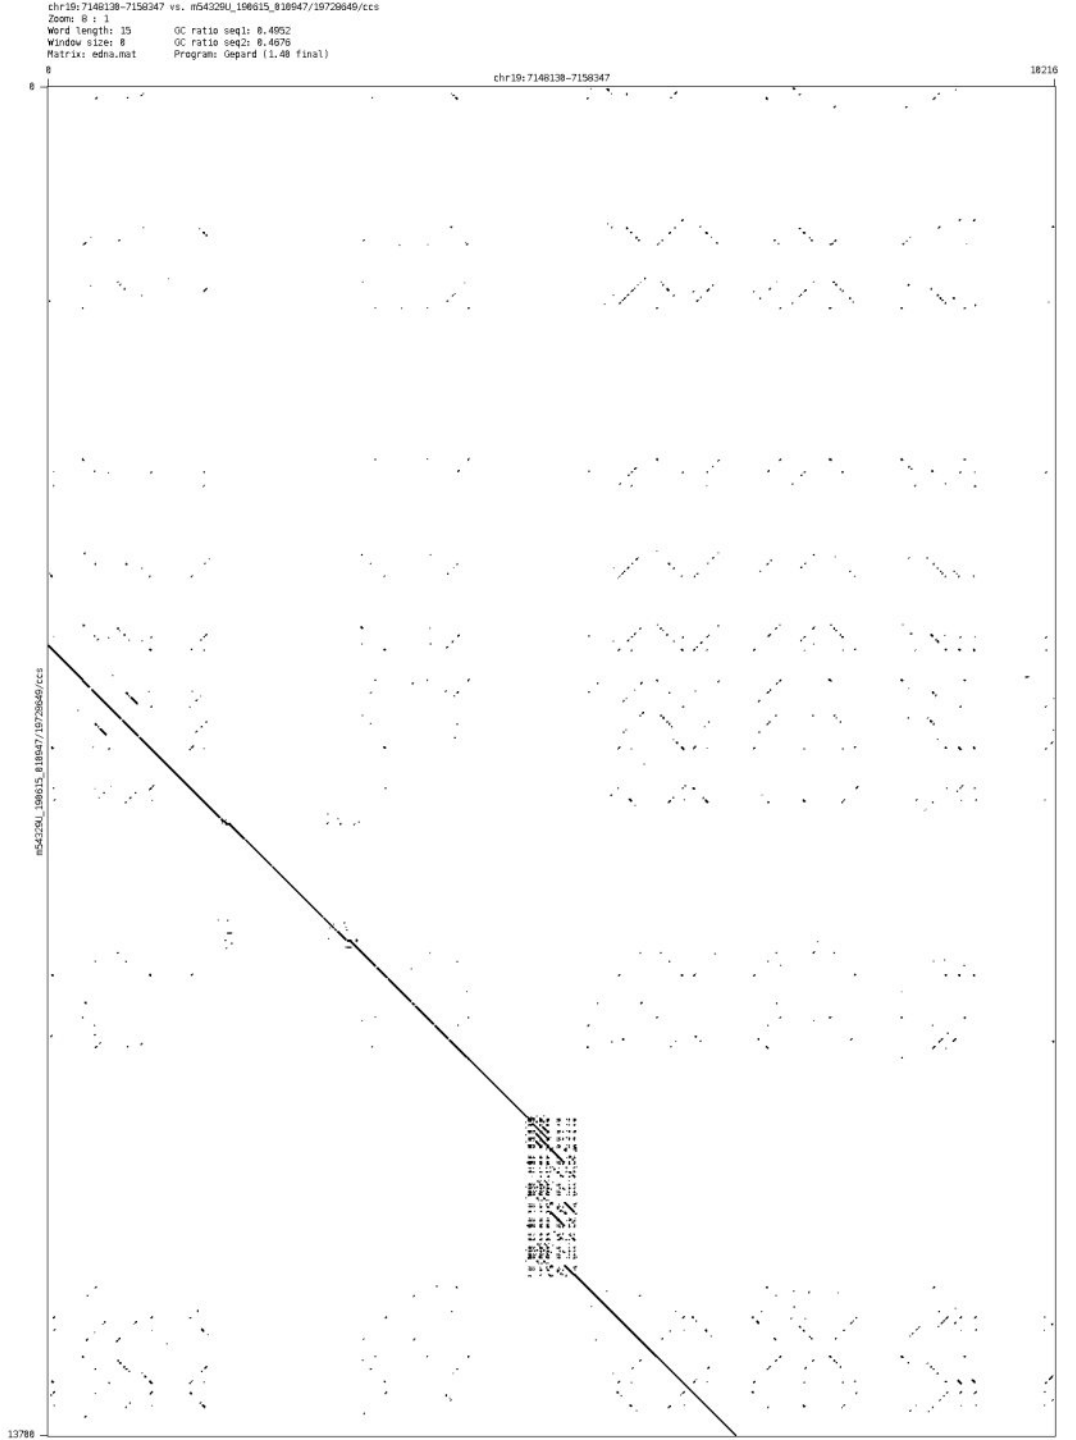



➤ chr19\_7331323\_7331681

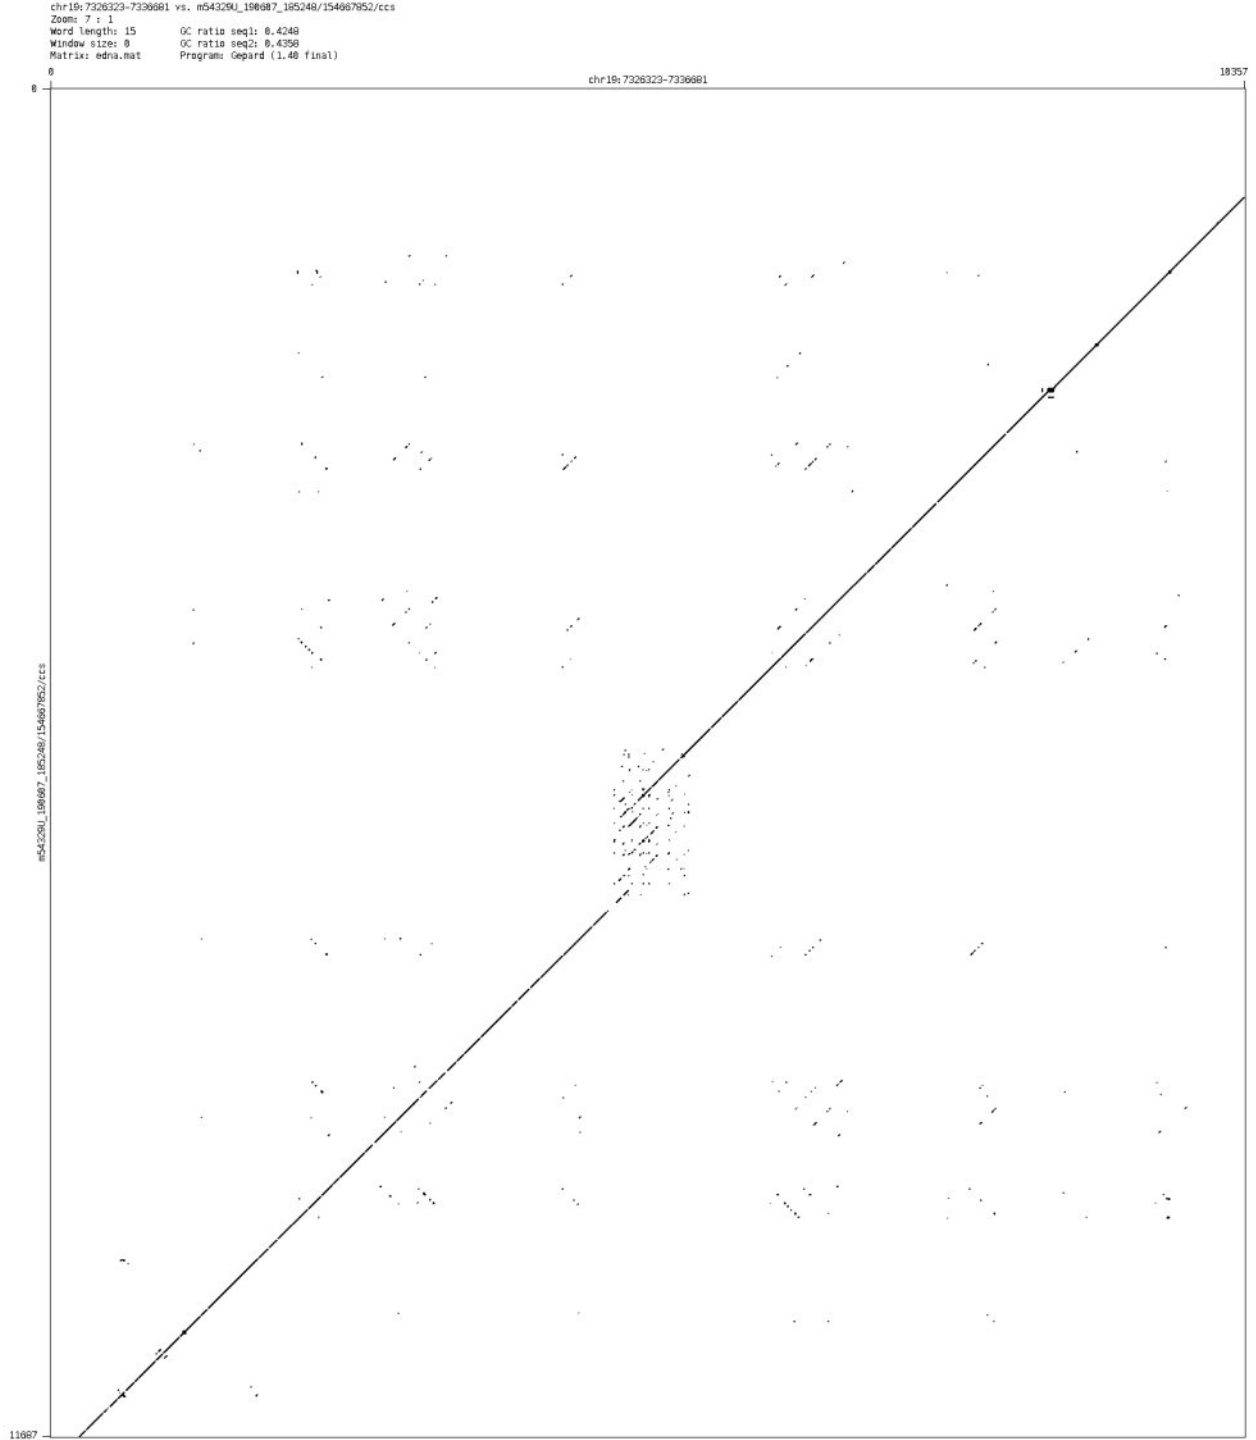

➤ chr19\_7450388\_7450641

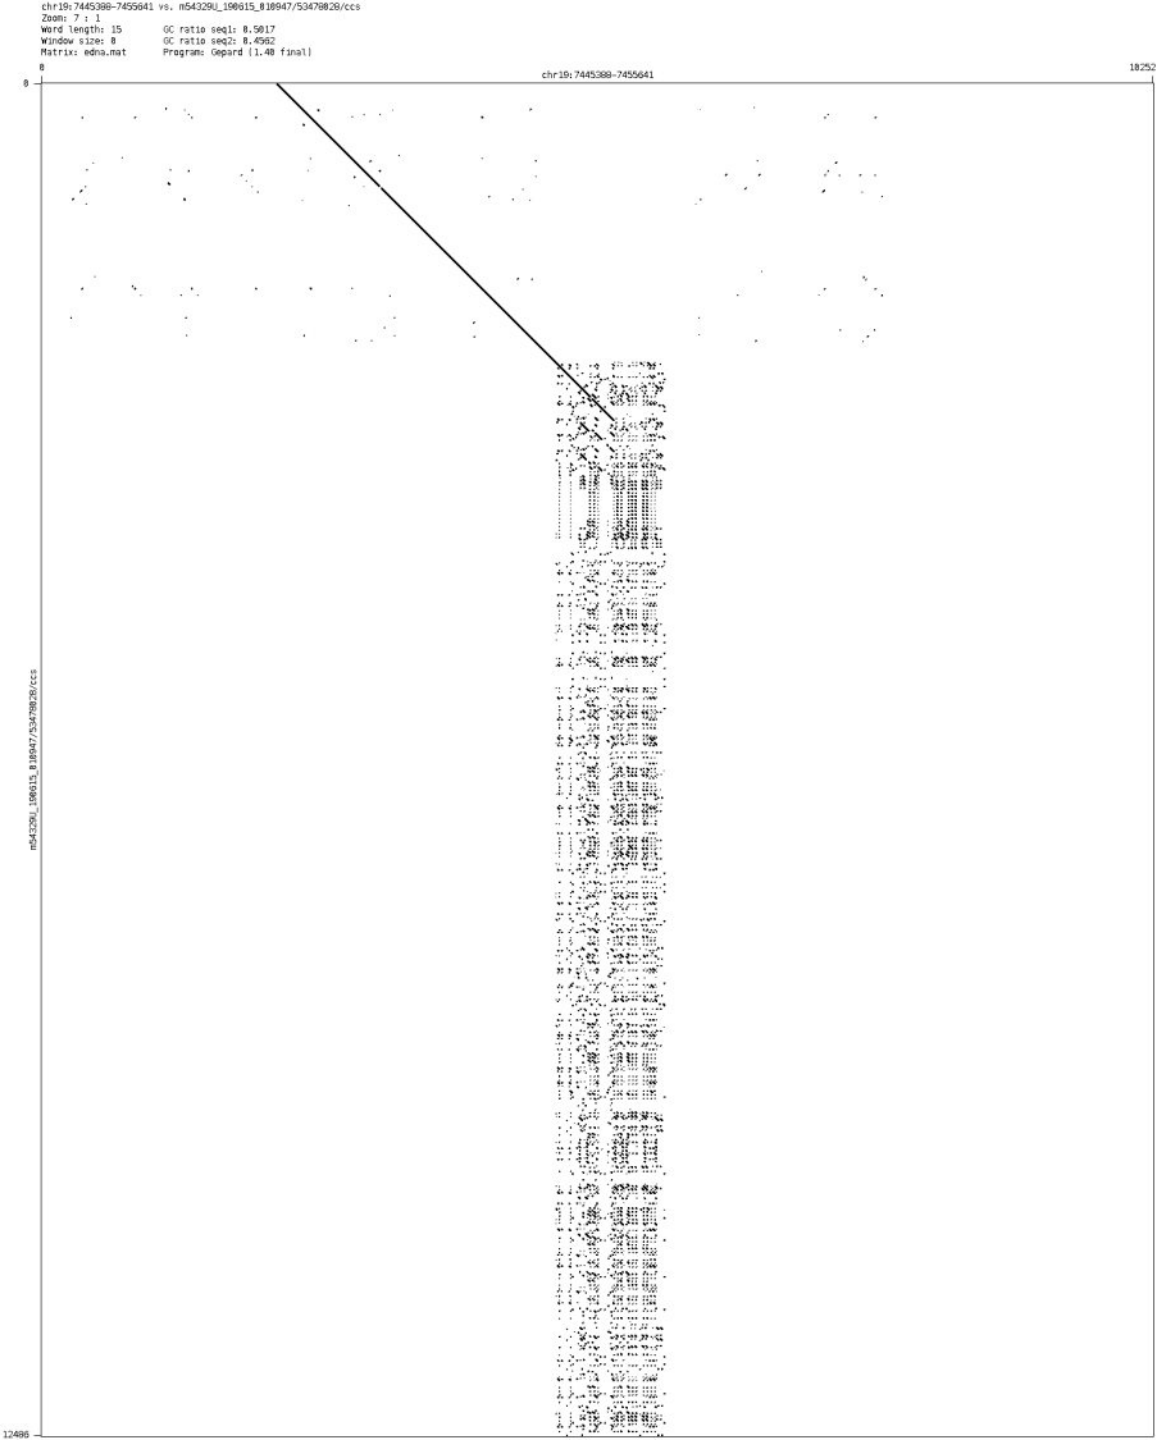

➤ chr19\_12989496\_12989651

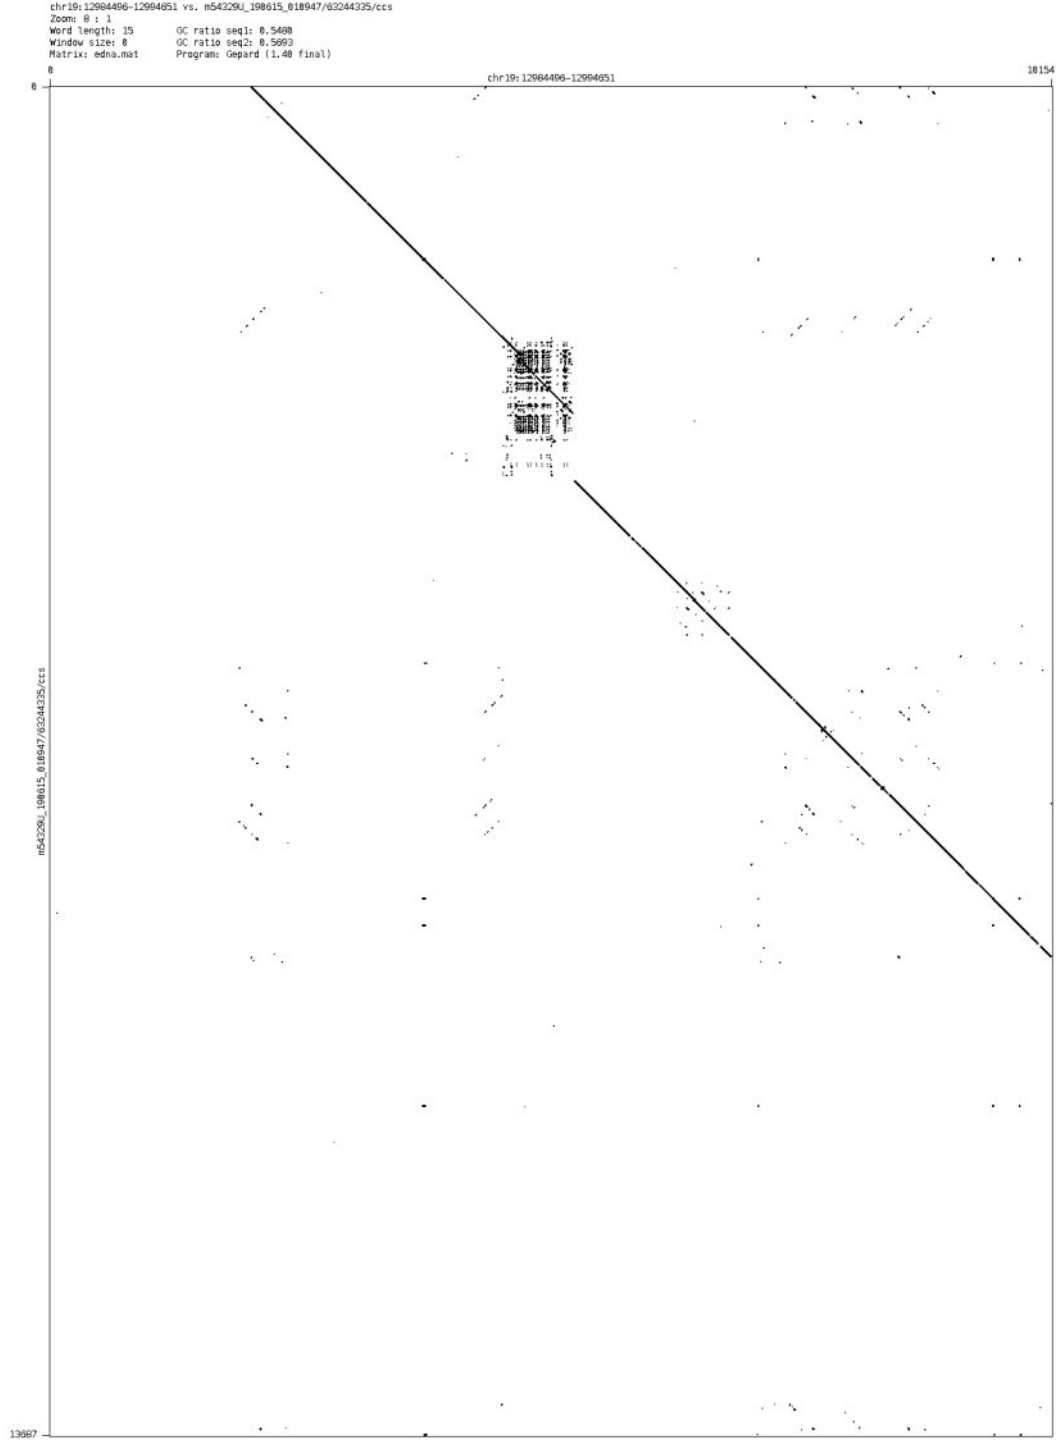

➤ chr19\_28888385\_28888515

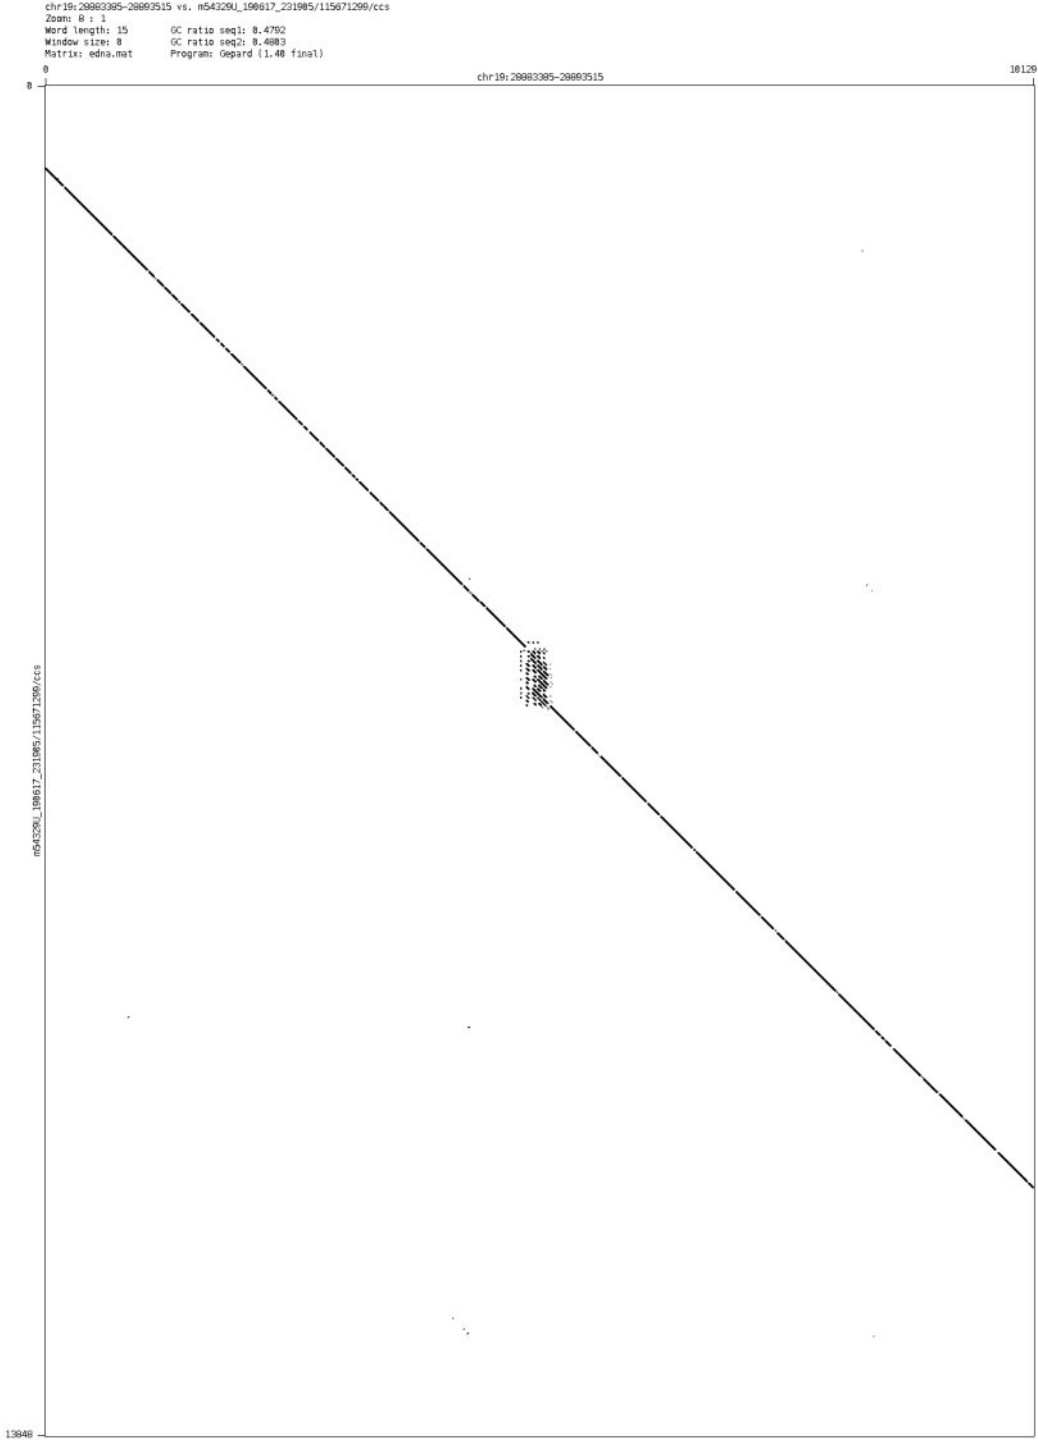

➤ chr19\_33249731\_33250285

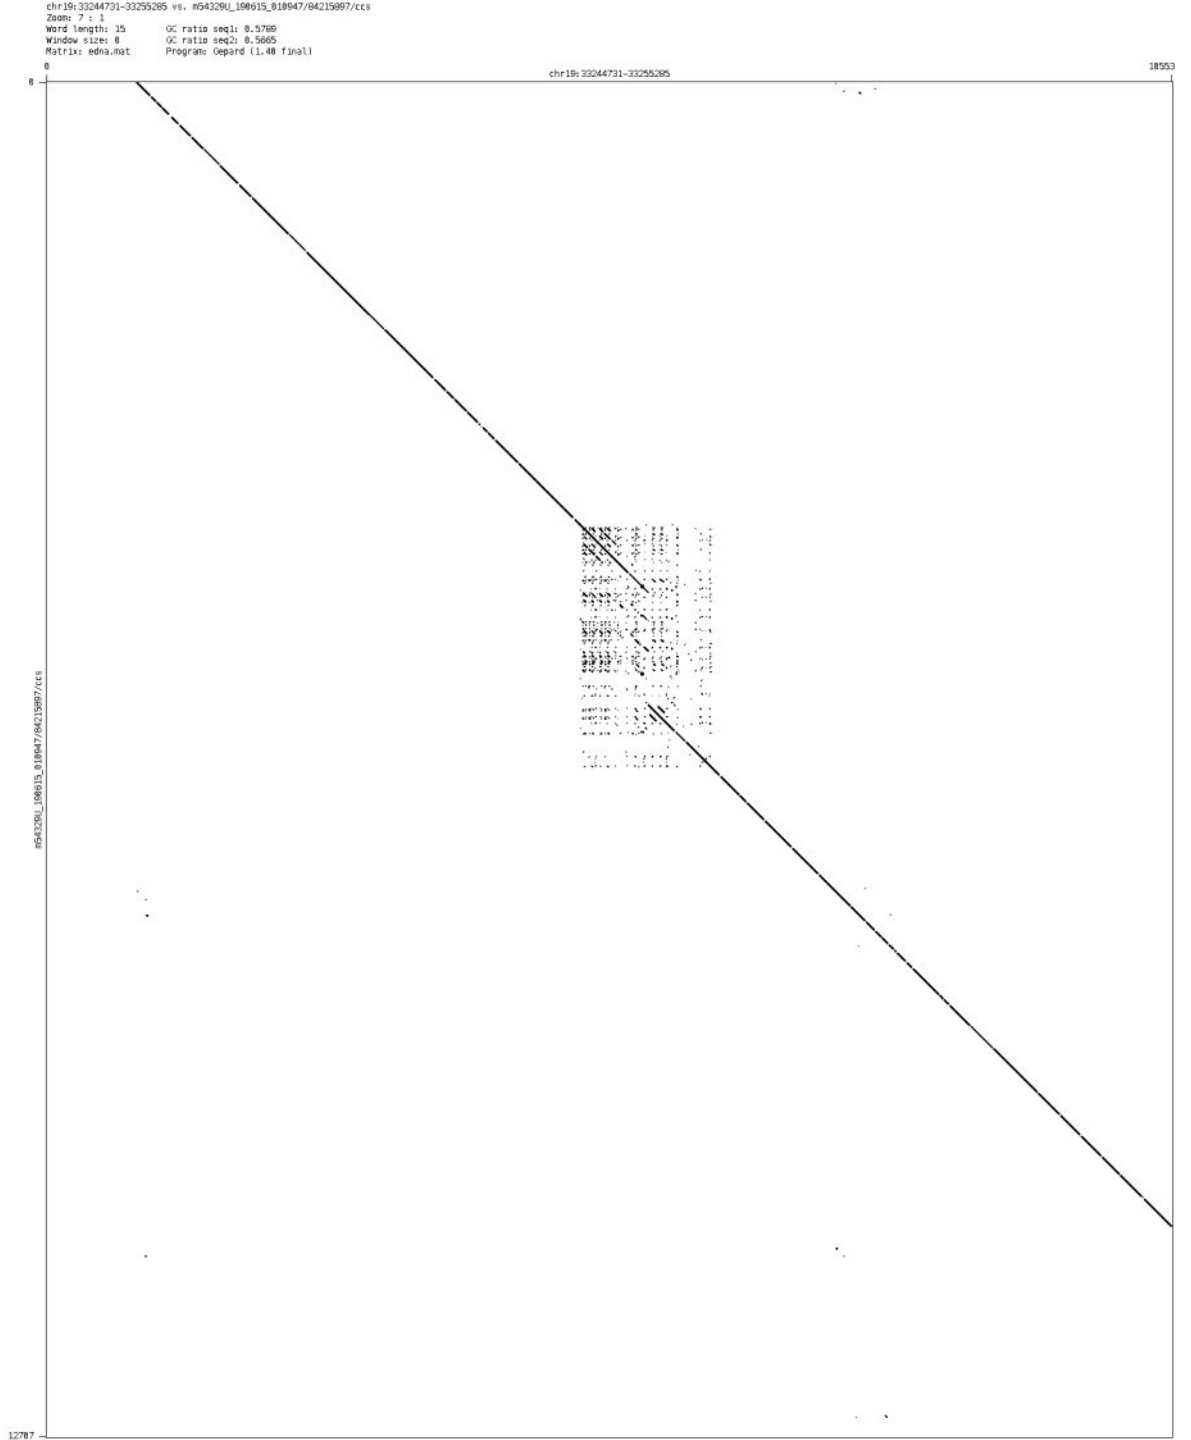

➤ chr19\_35105945\_35106010

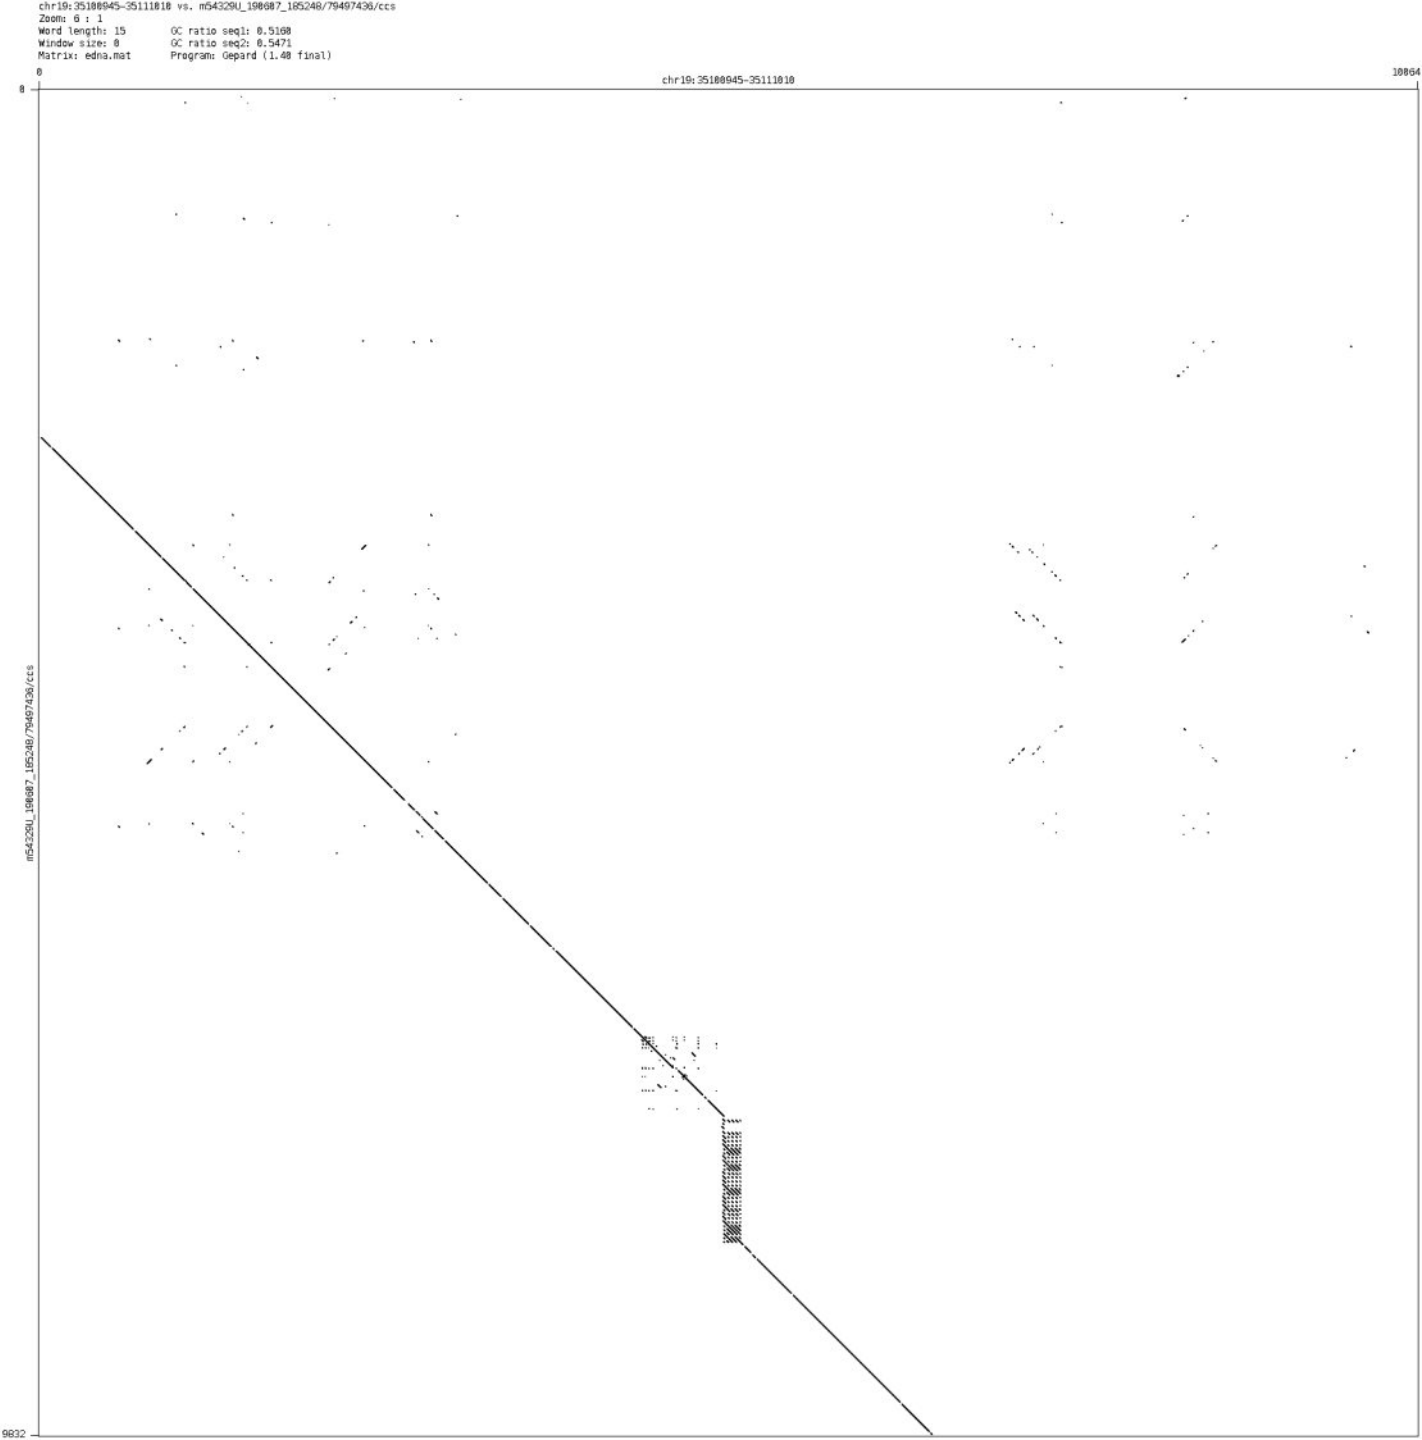

➤ chr19\_41803069\_41807384

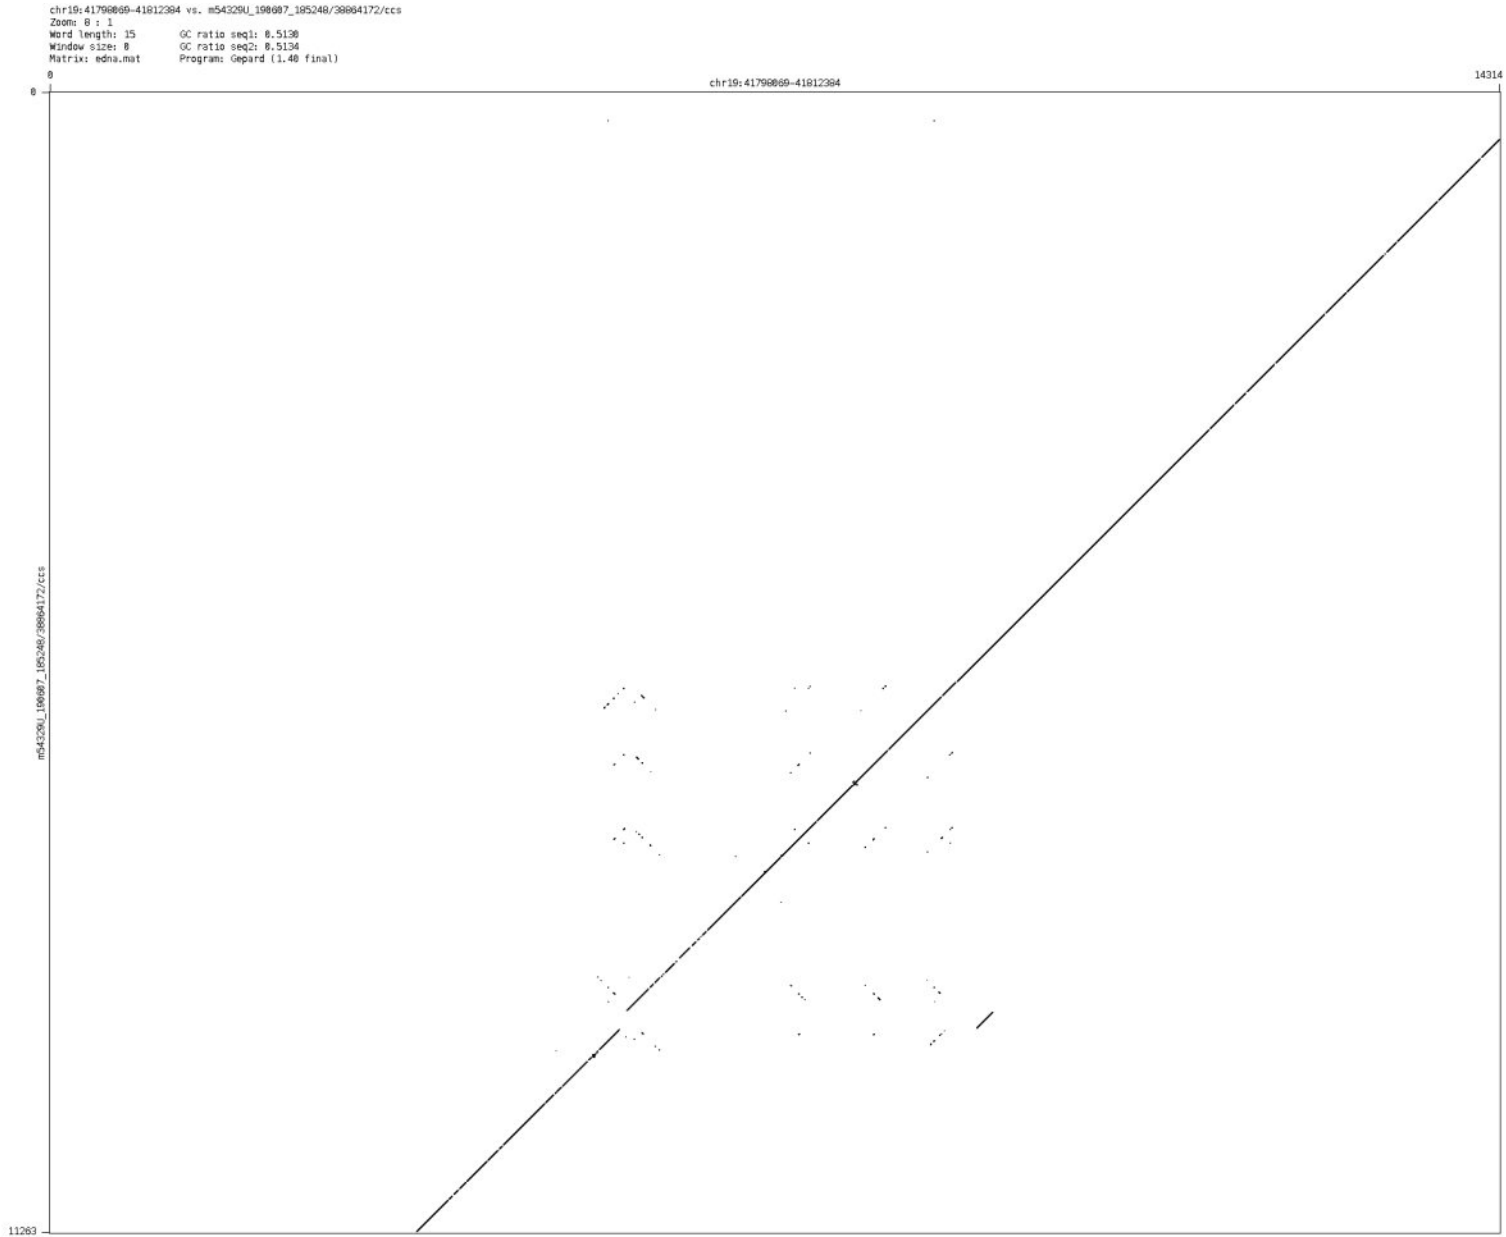

➤ chr19\_54109797\_54109852

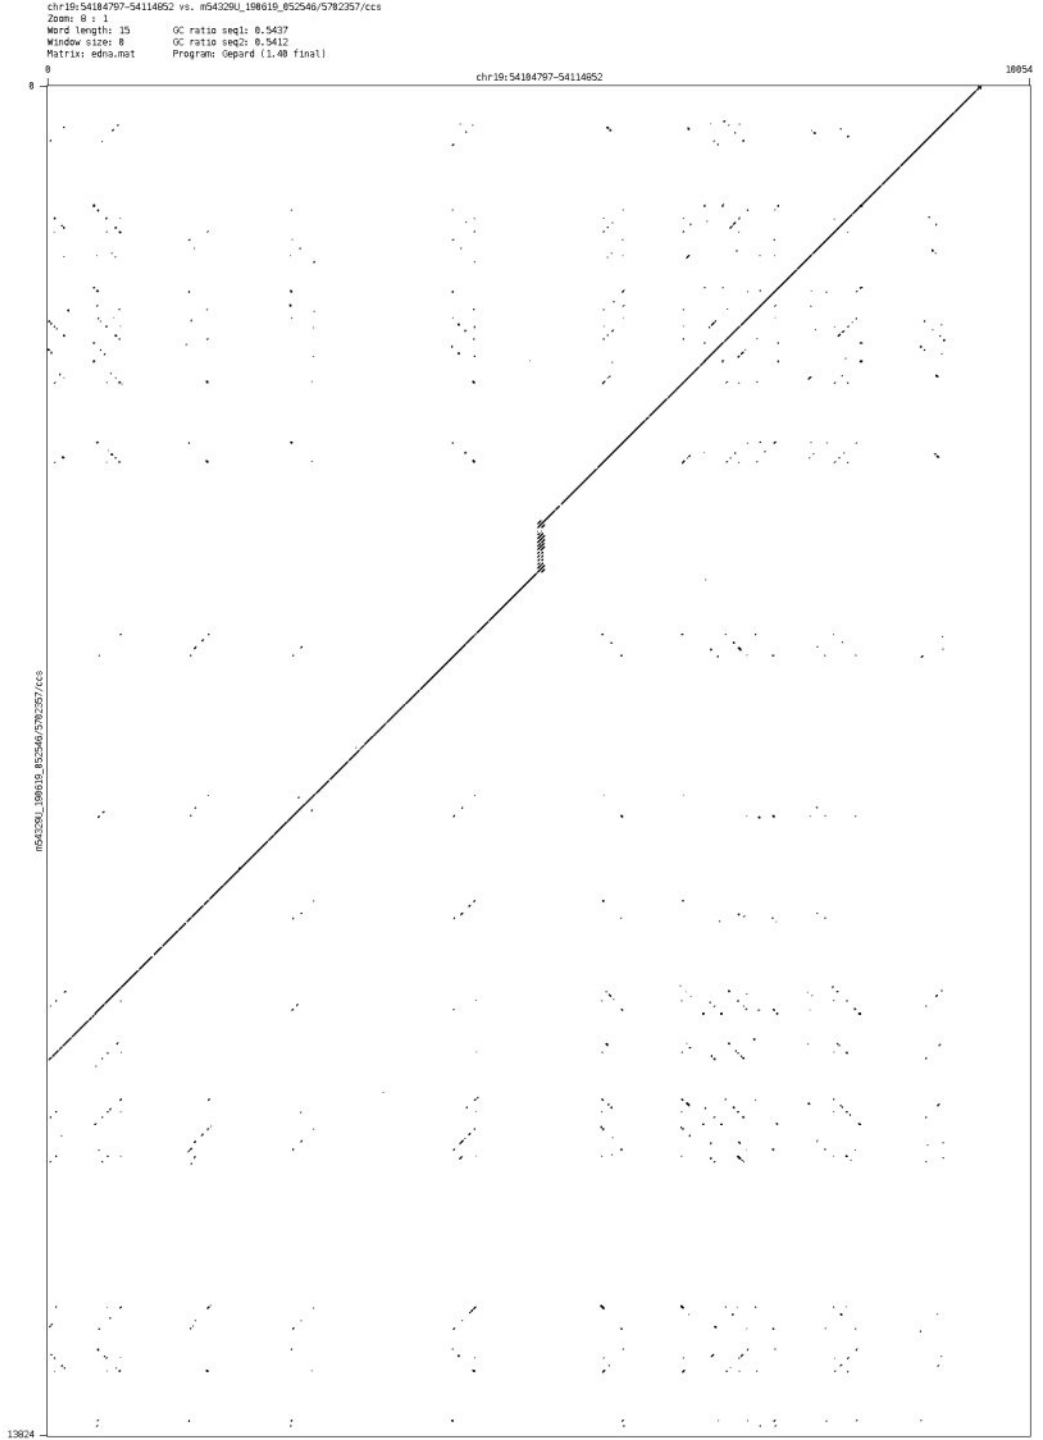



➤ chr19\_54133743\_54133869

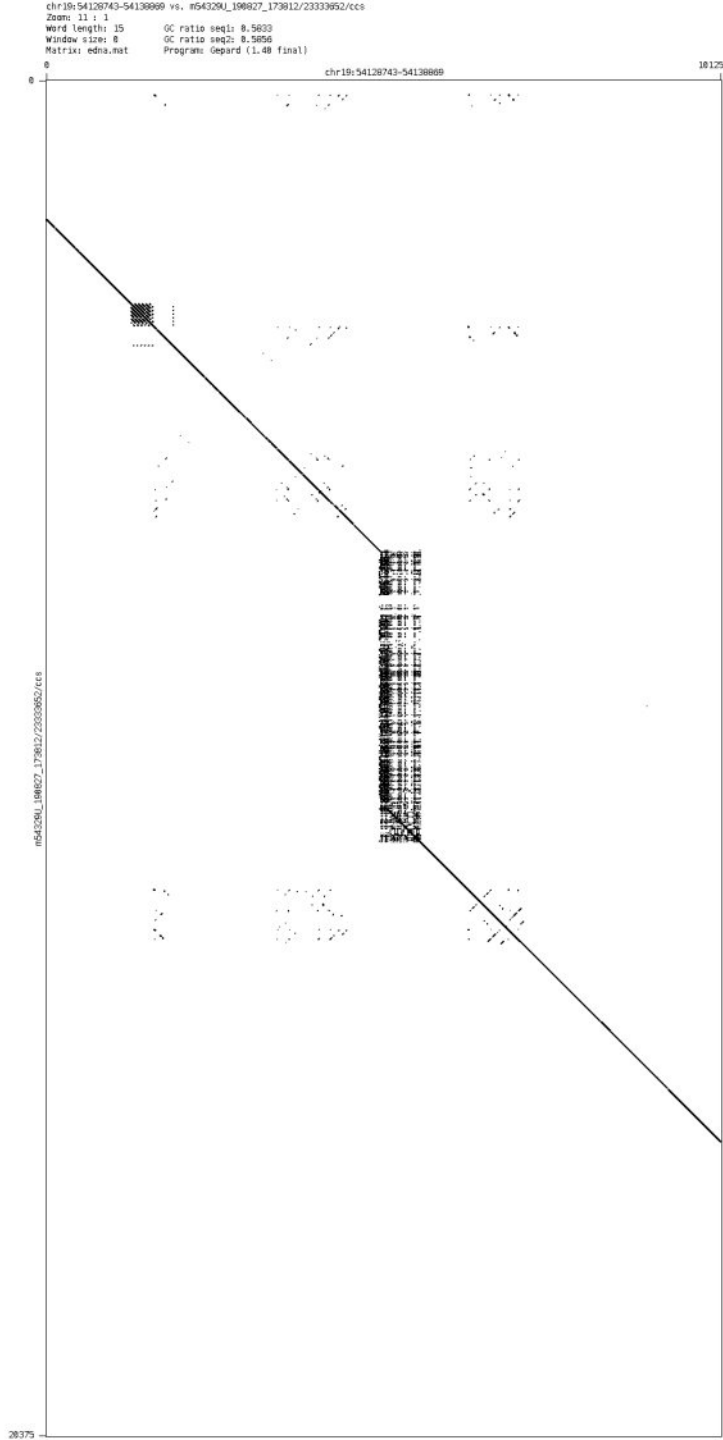

➤ chr19\_55670439\_55670523

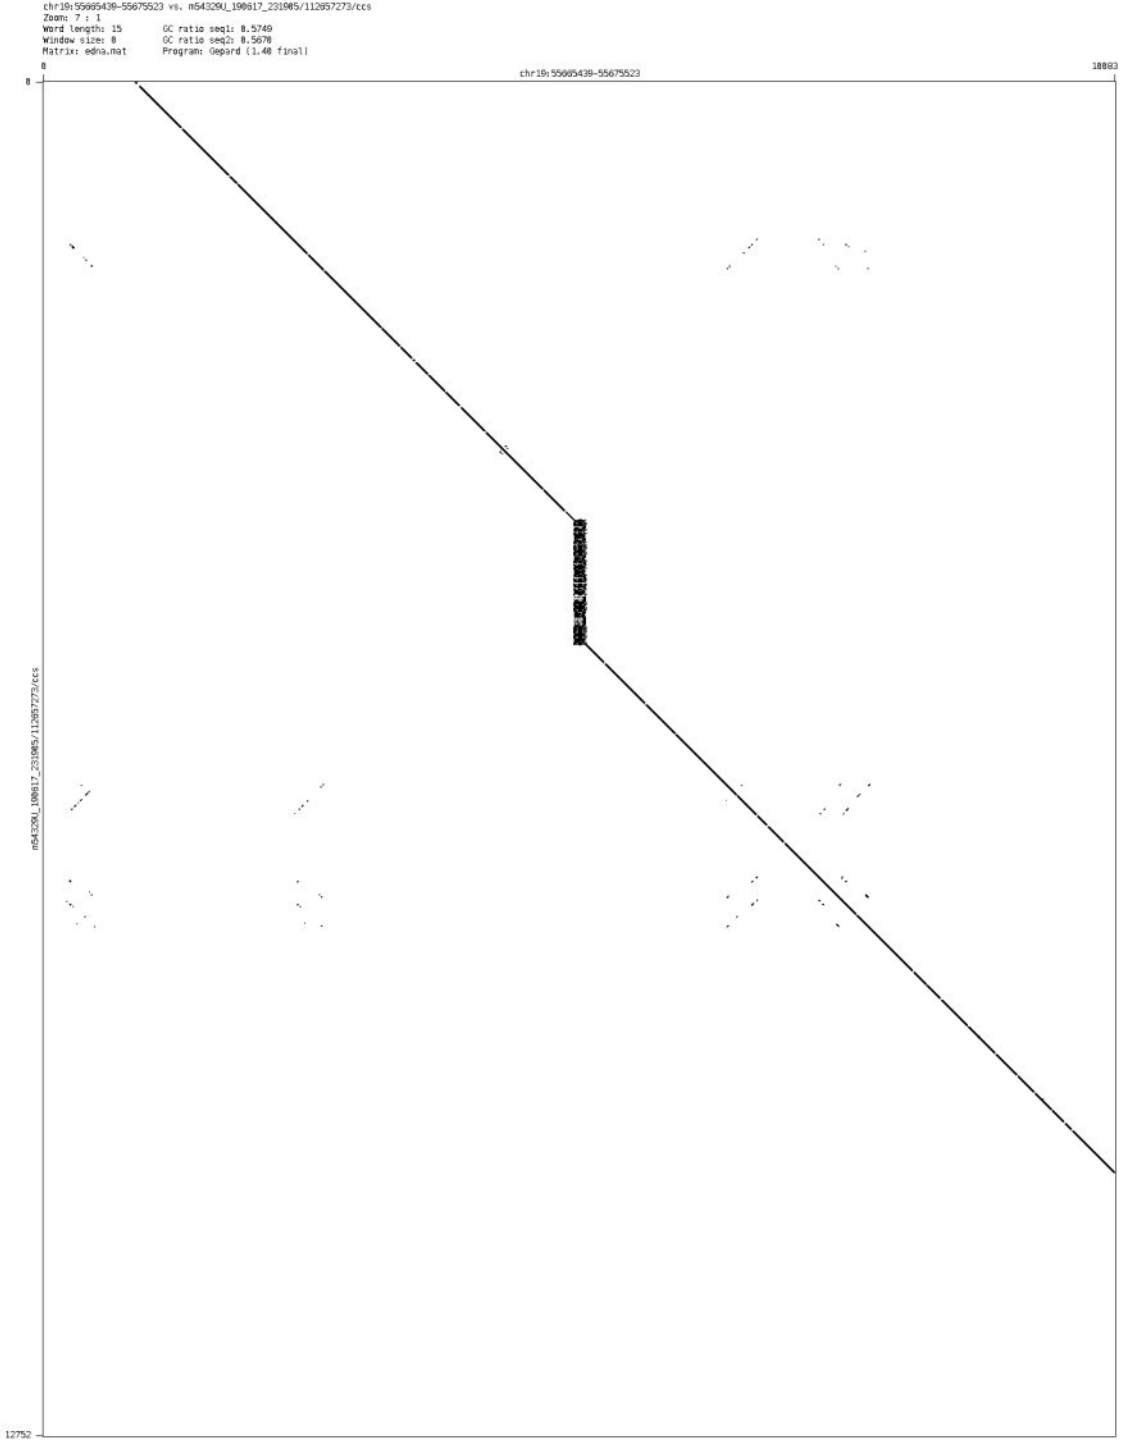

➤ chr19\_56942922\_56942975

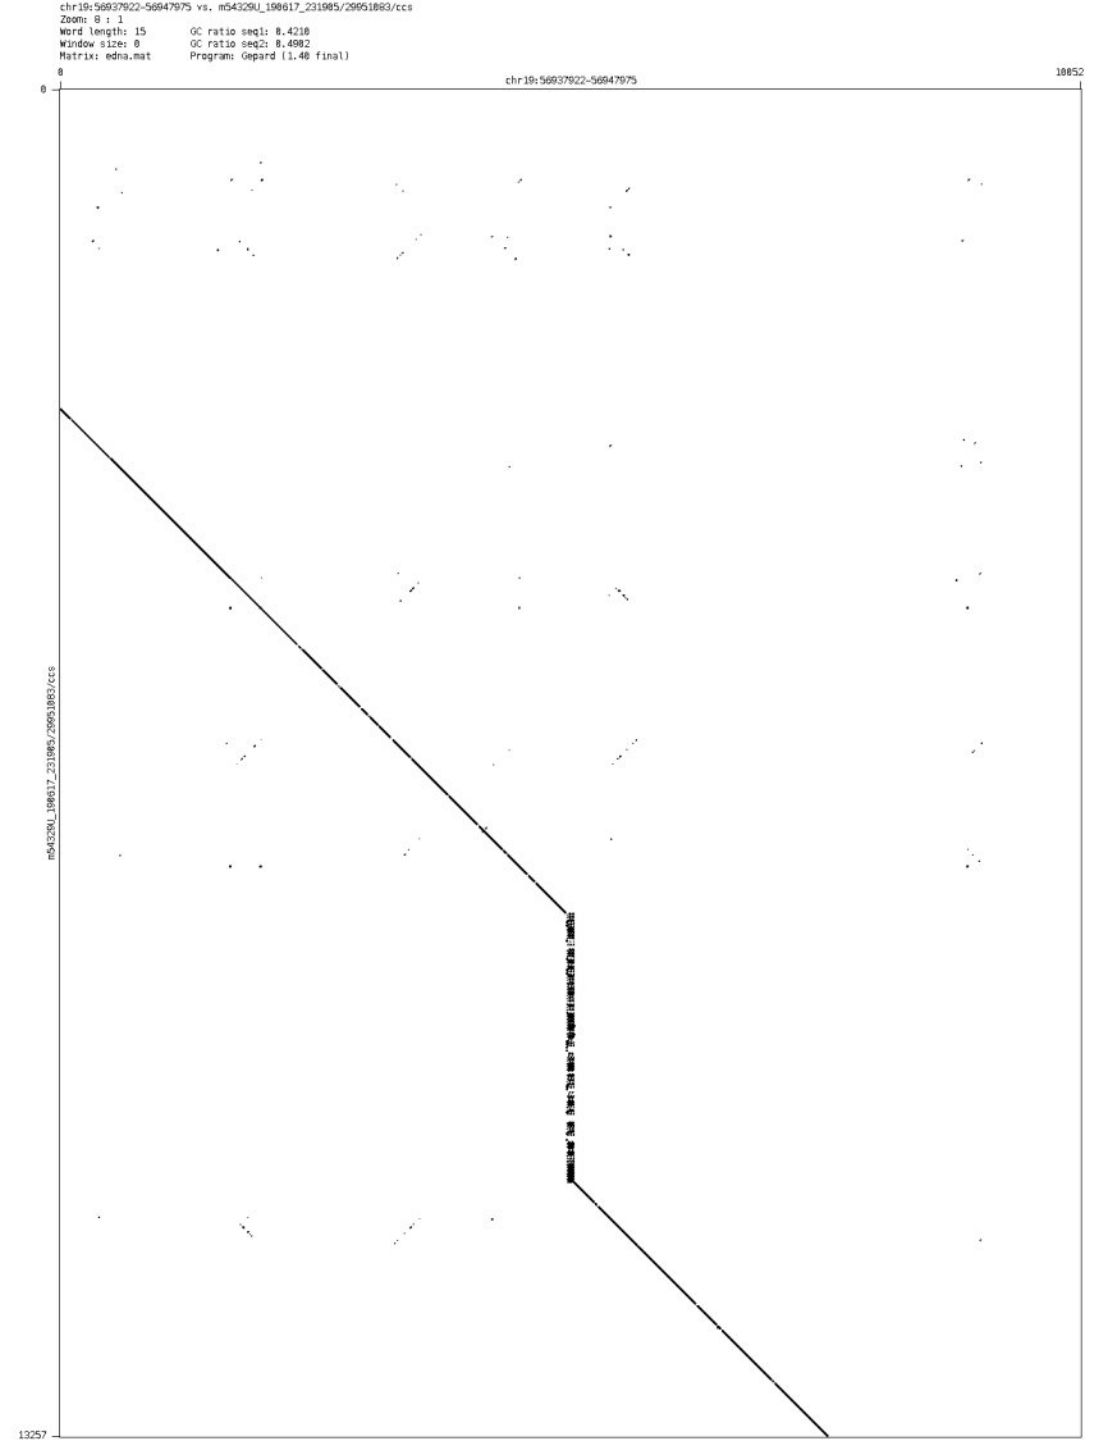

➤ chr20\_2236338\_2236455

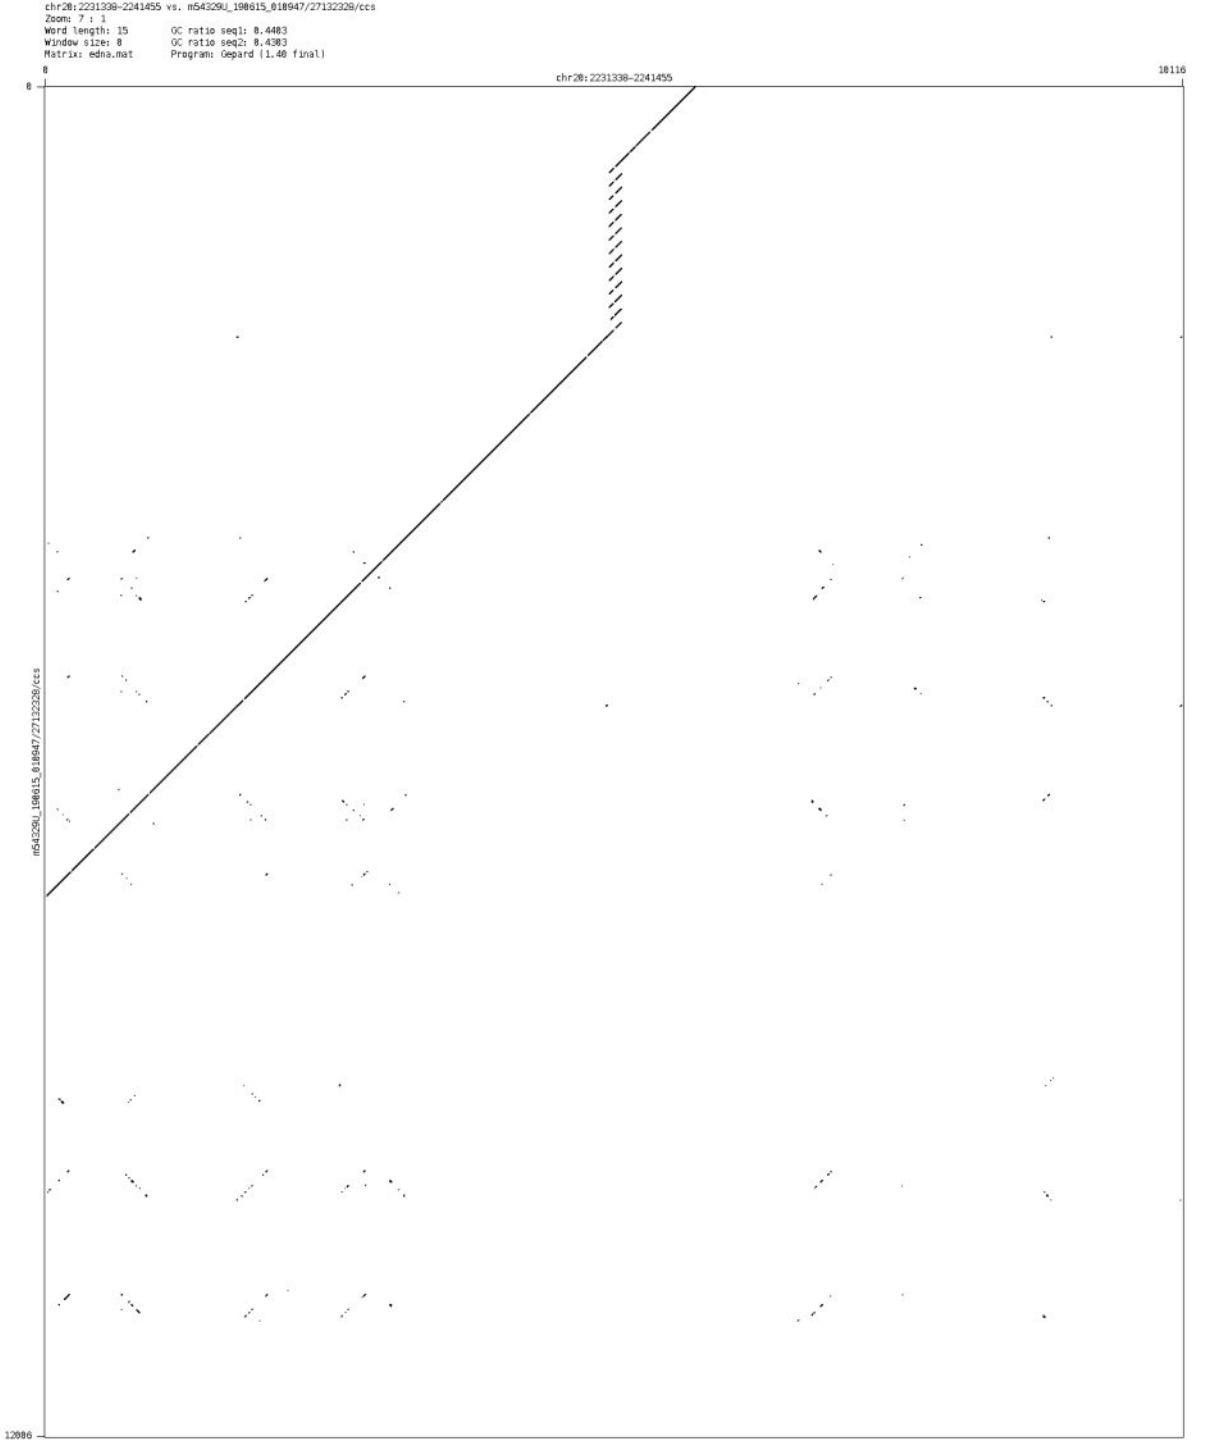

➤ chr20\_2379056\_2380273

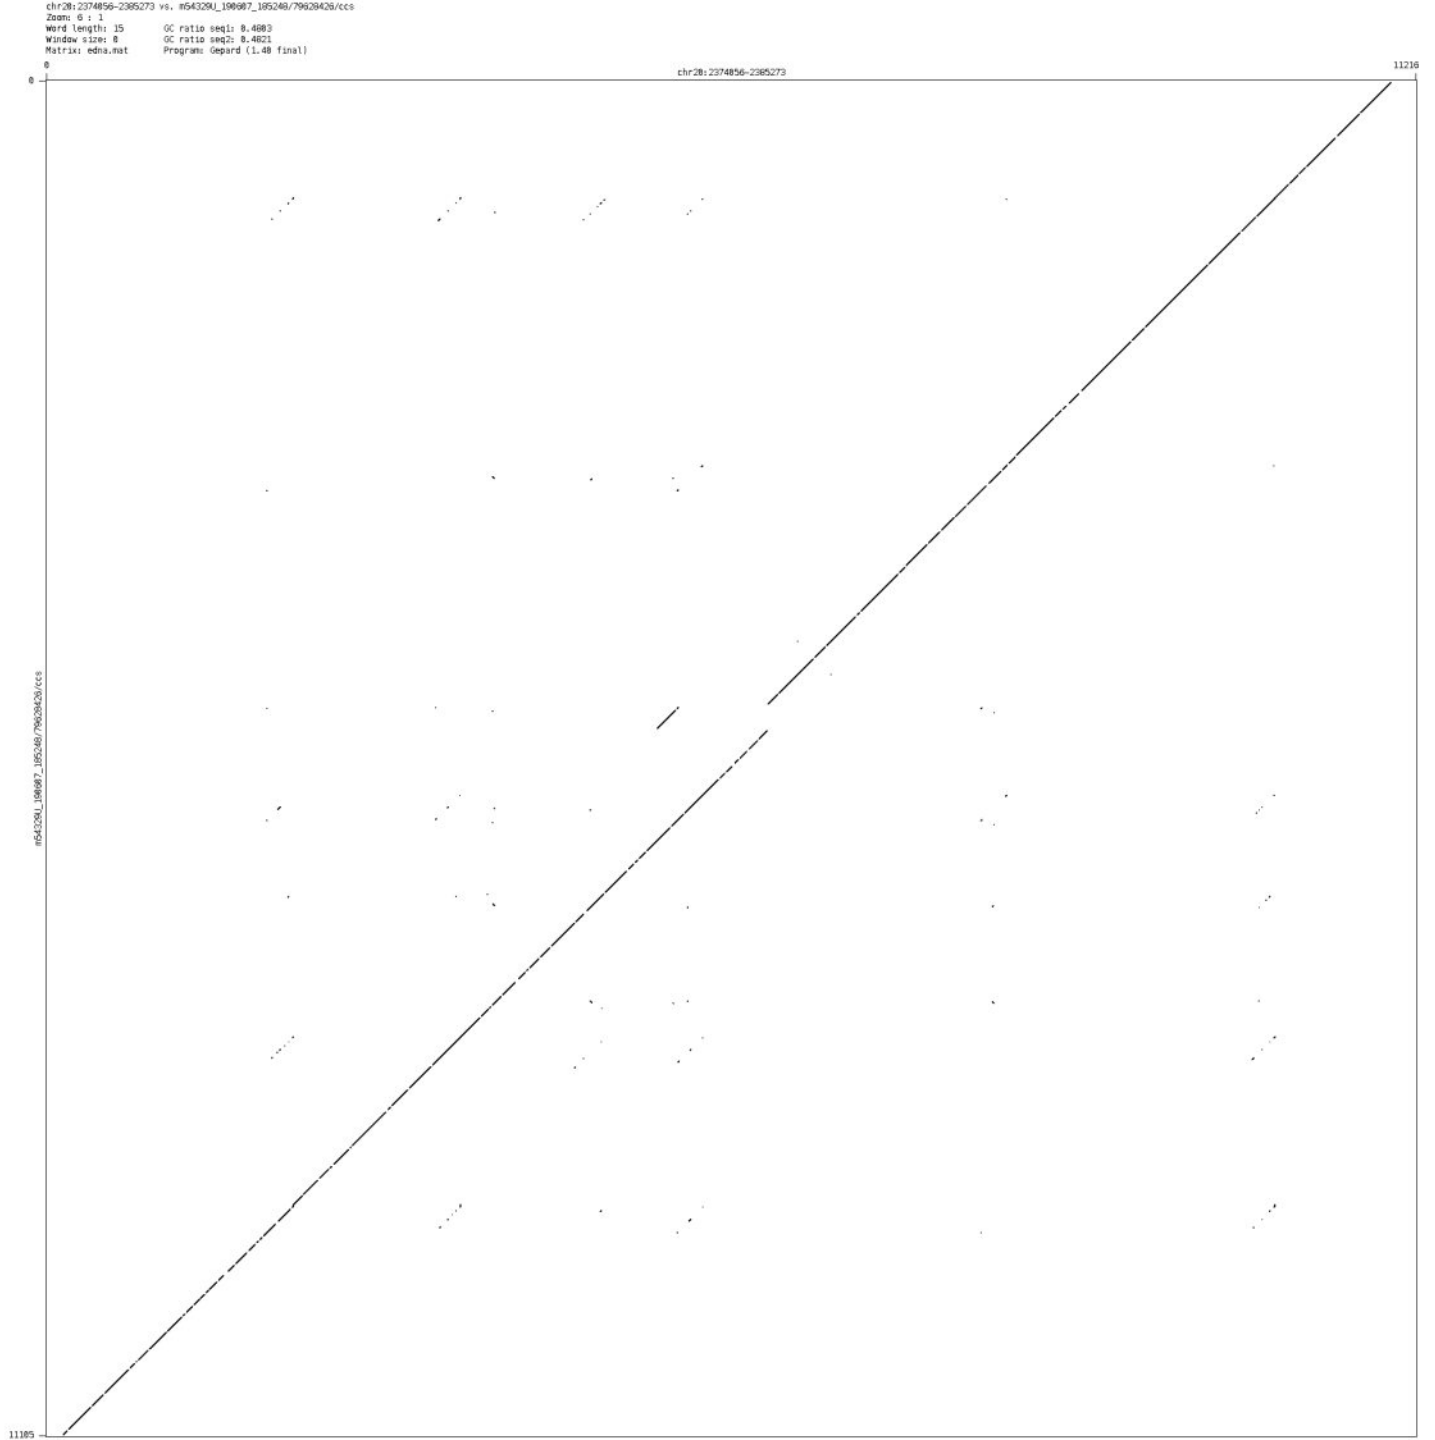

➤ chr20\_13934330\_13934452

chr20:13029338-13934452 vs. n54329L150897.185248/114834348/ccs  
Zbin: 0 : 1 GC ratio seq1: 0.4869  
Ward length: 15 GC ratio seq2: 0.3738  
Window size: 0  
Matrix: edna.mat Program: gepard (1.48 final)

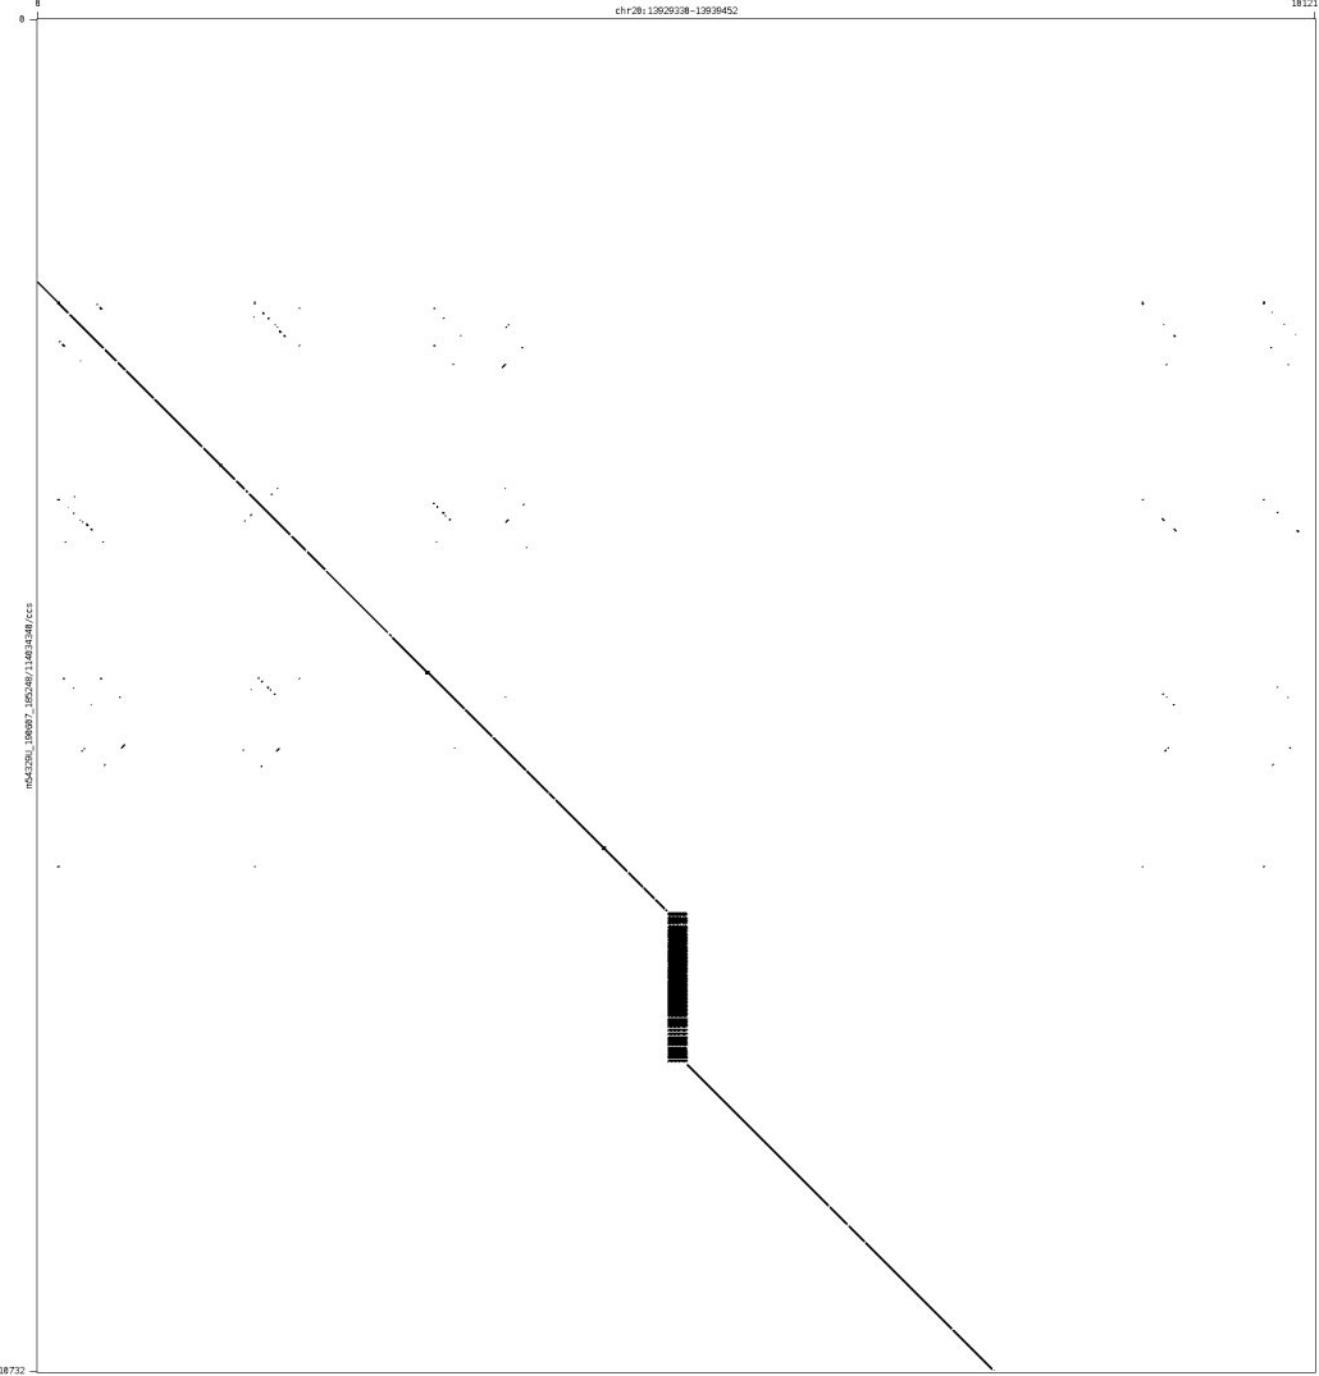

➤ chr20\_19924430\_19924495

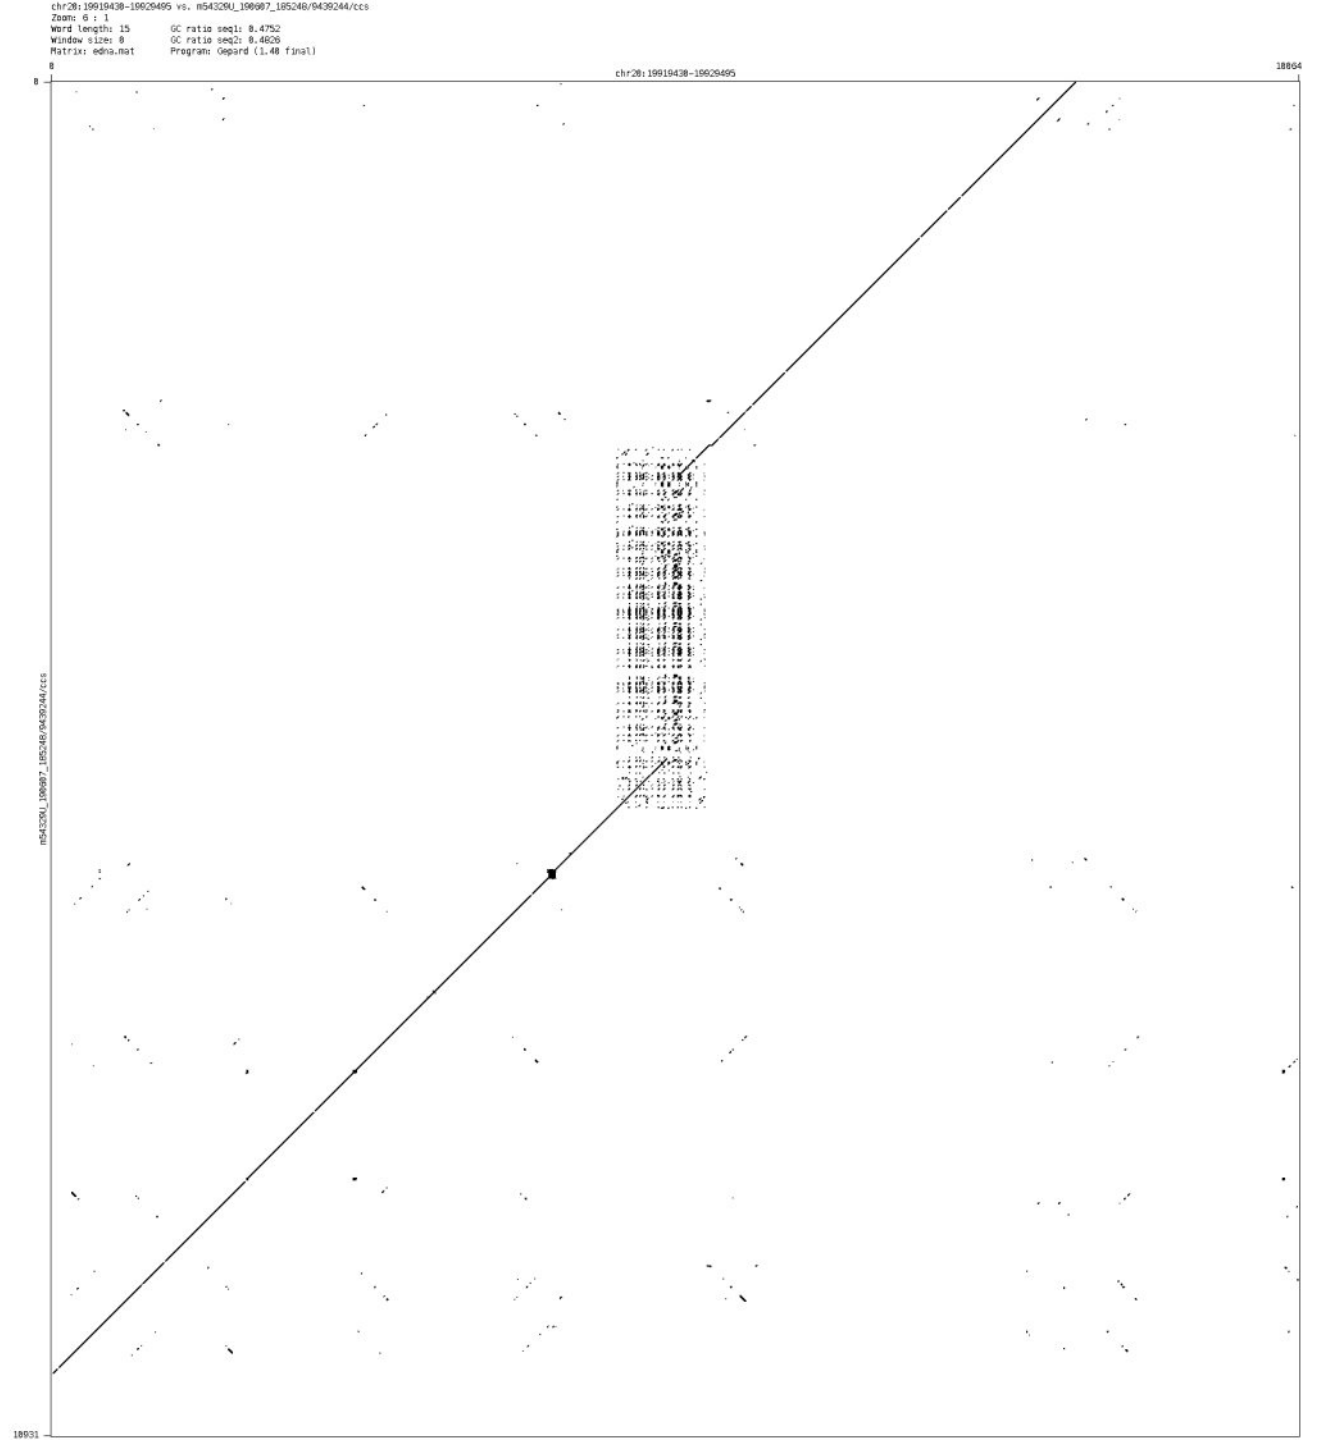

➤ chr20\_20337356\_20337505

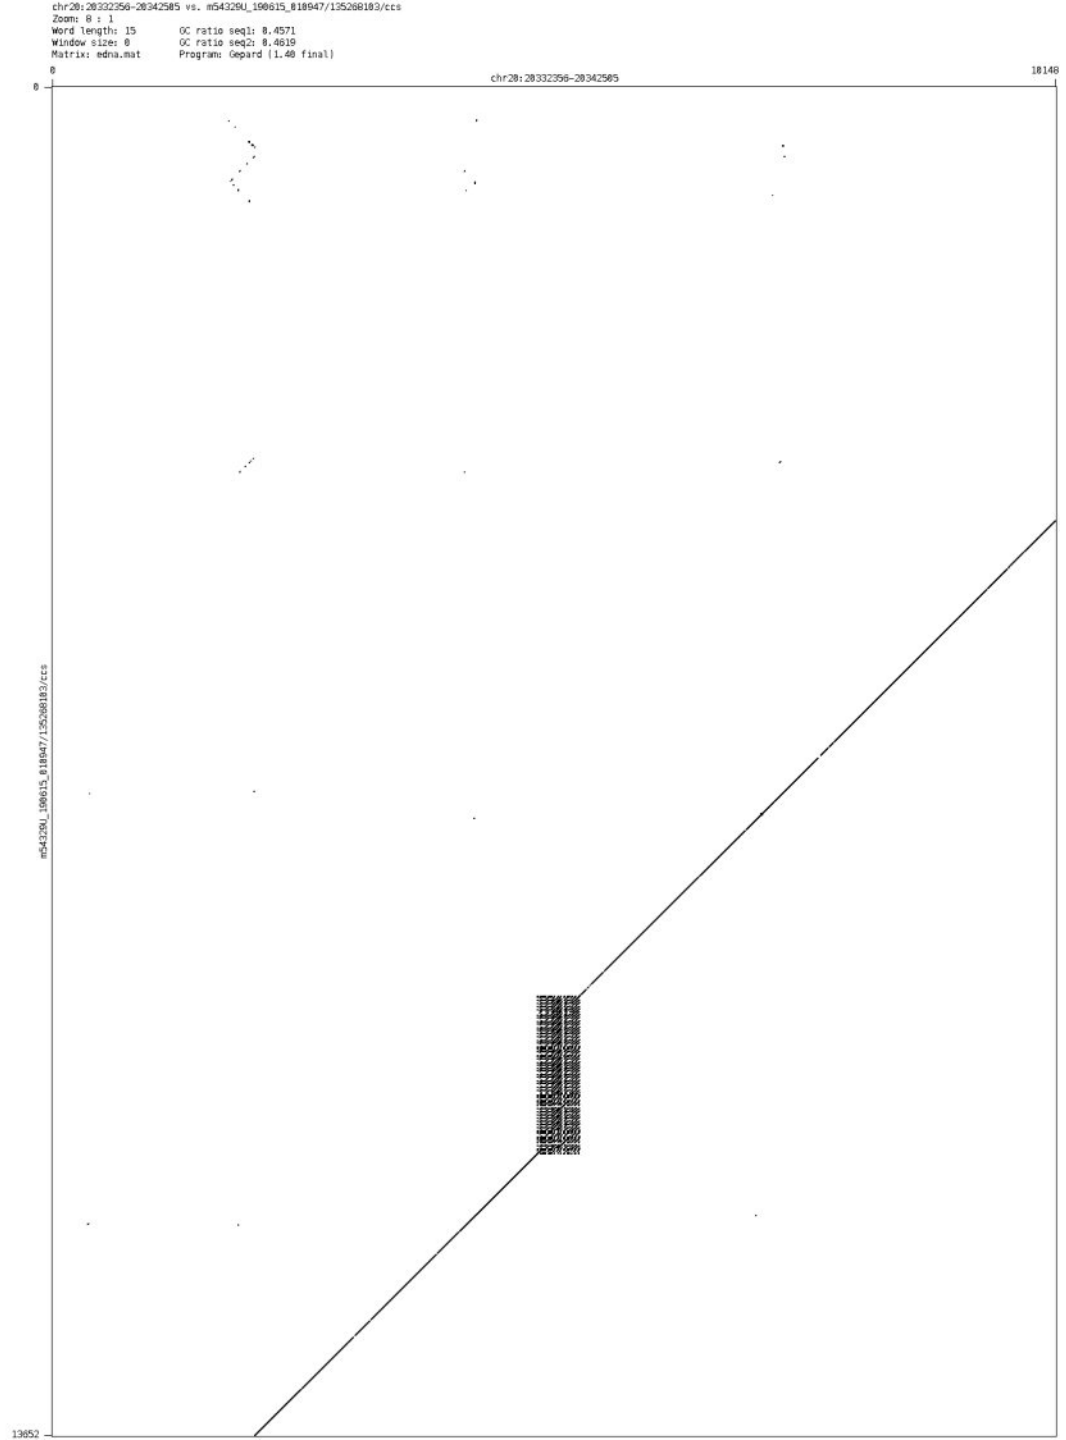



➤ chr20\_20356363\_20357230

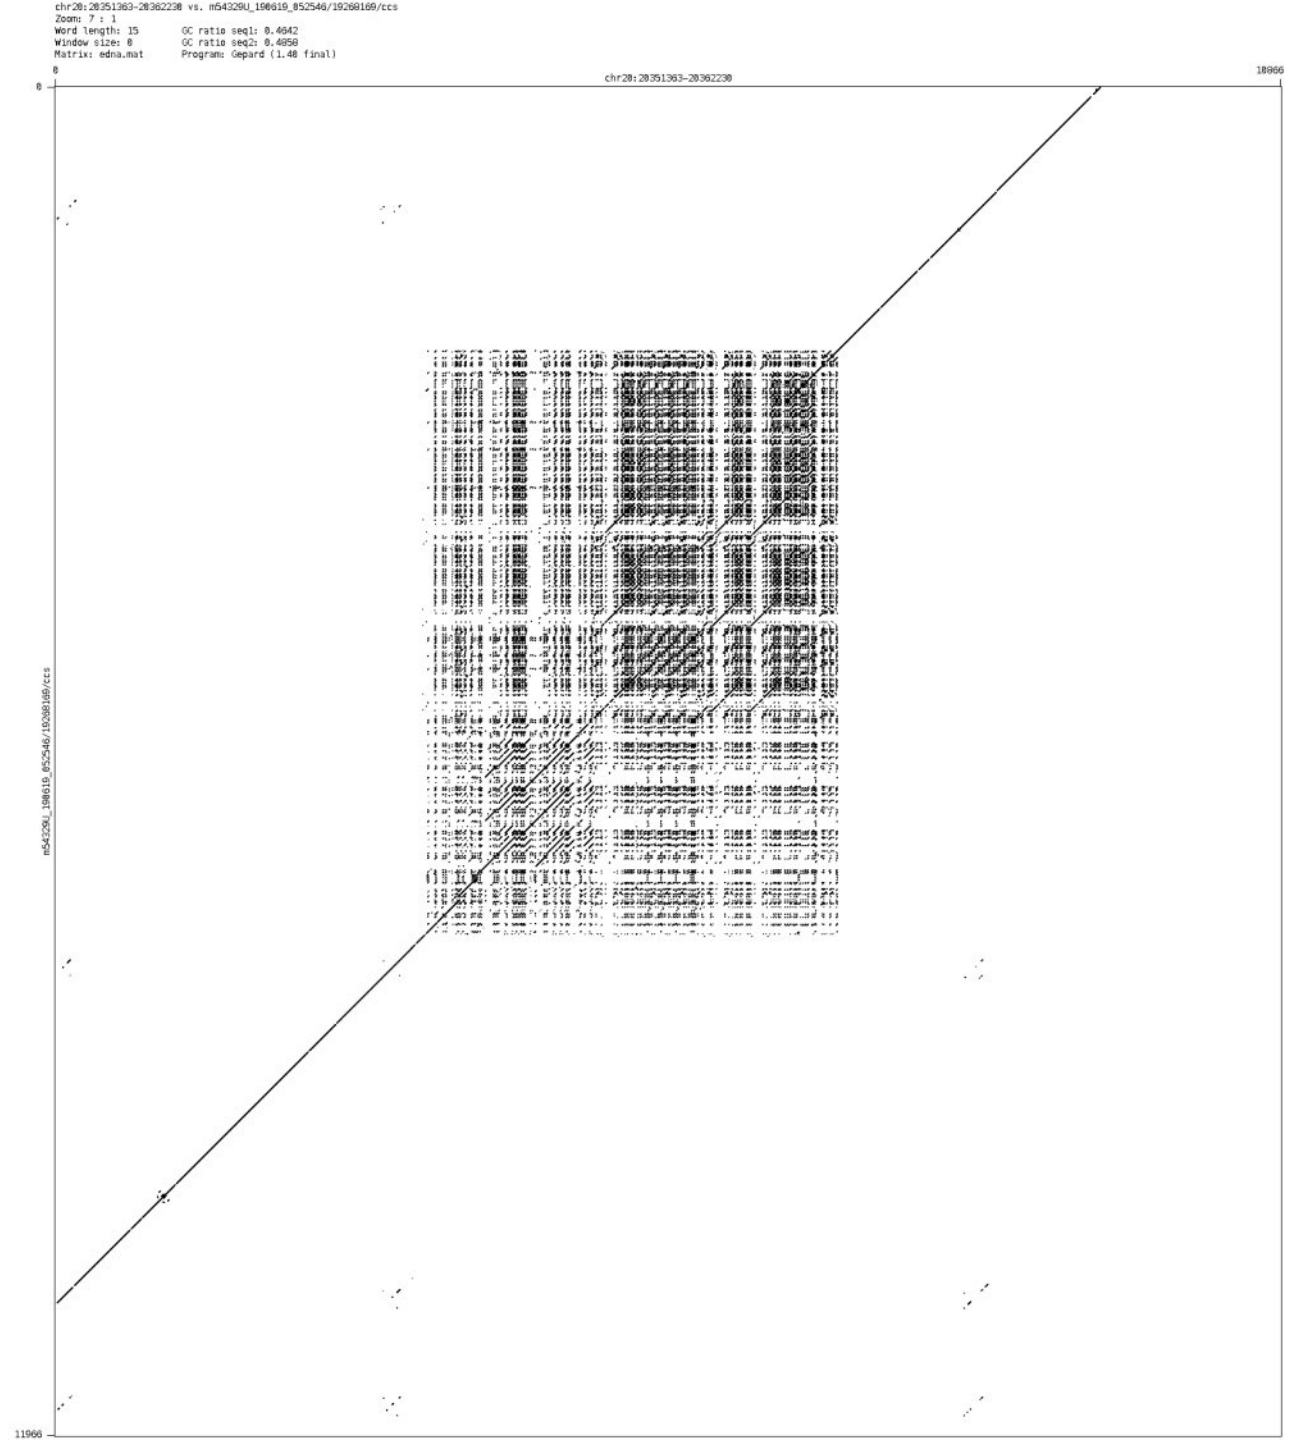

➤ chr20\_38463938\_38464116

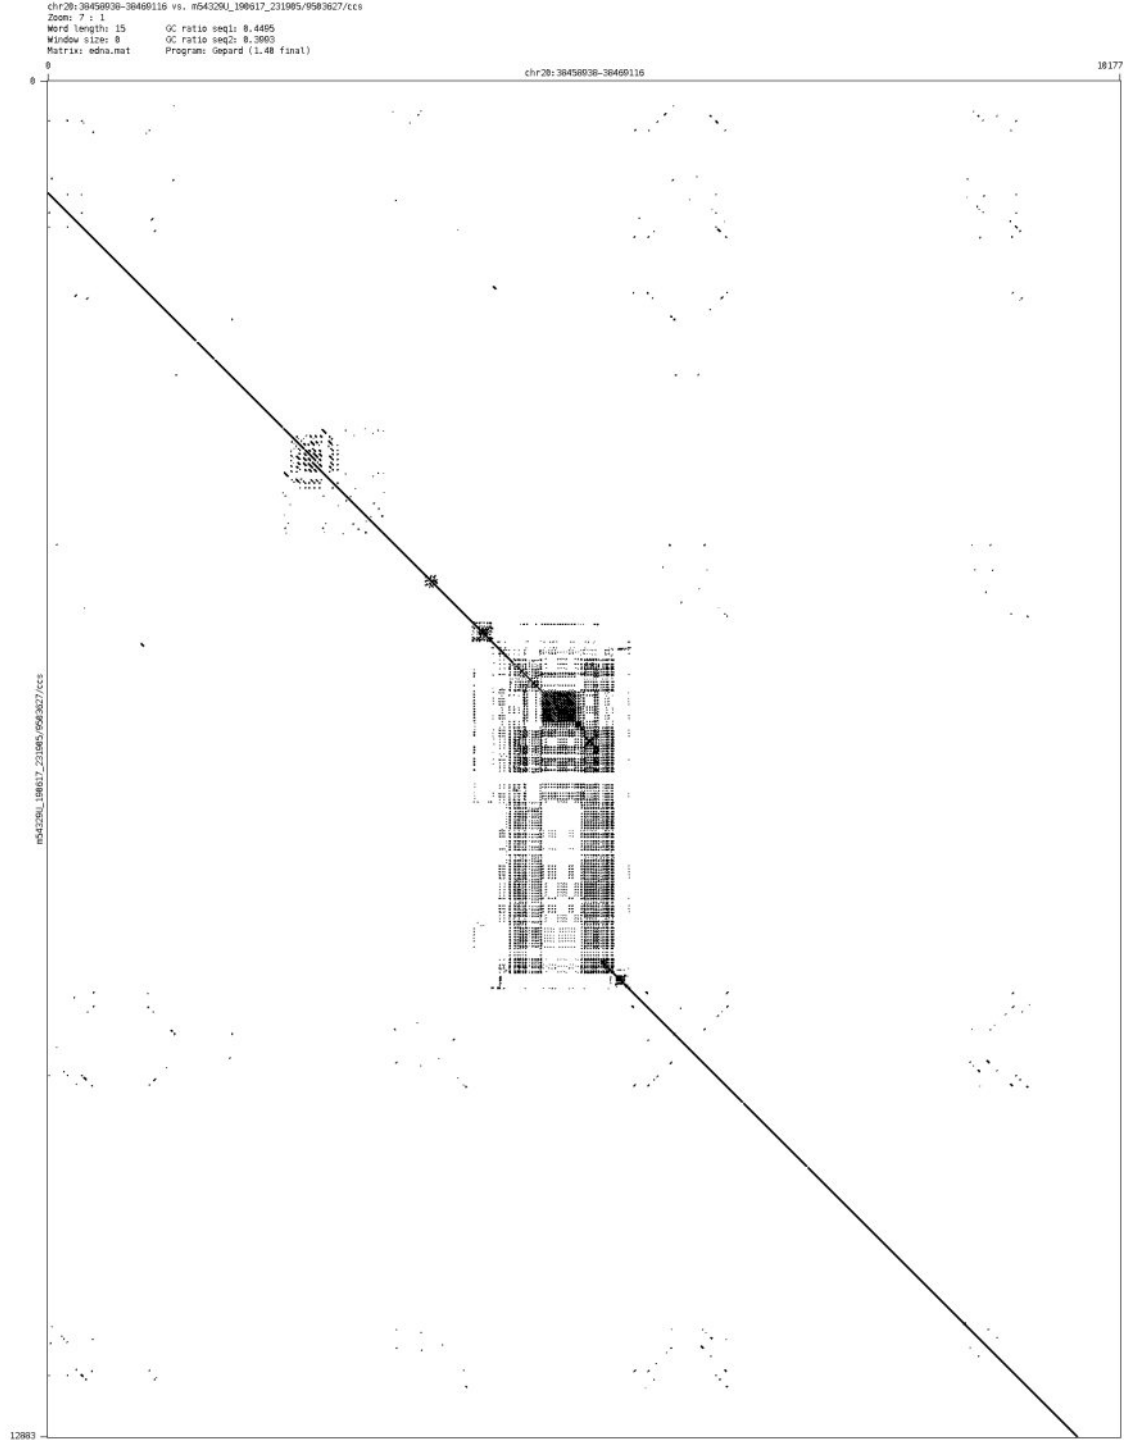

➤ chr20\_44404913\_44405031

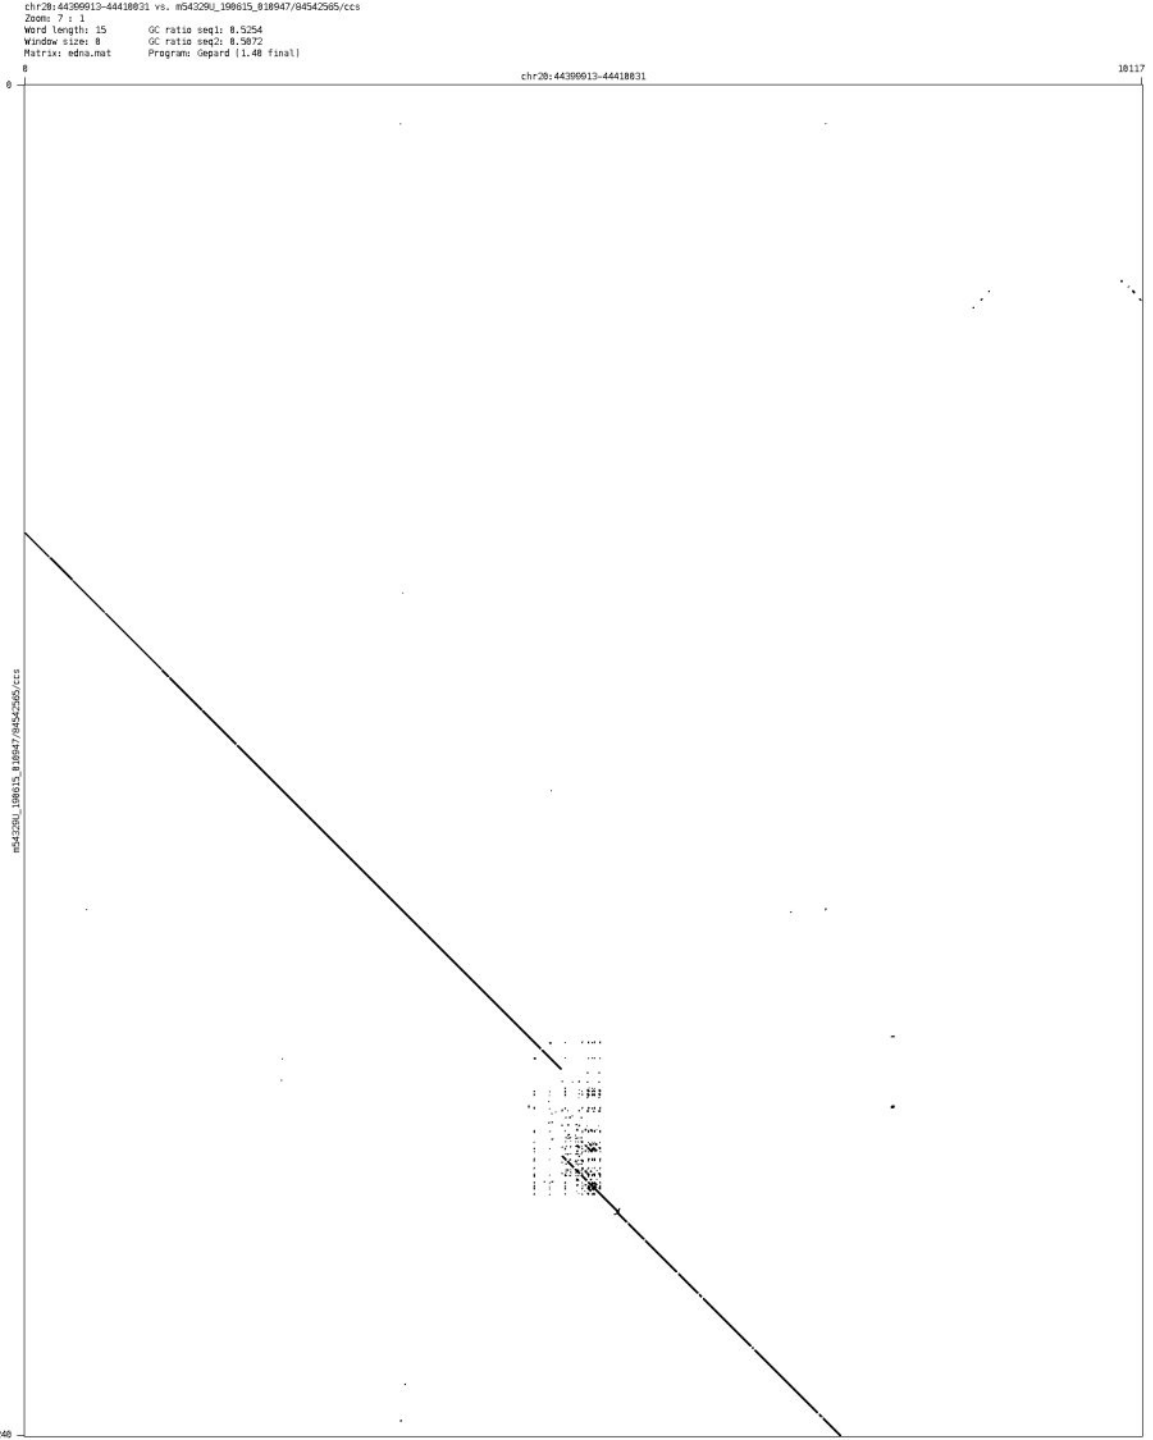

➤ chr20\_44676947\_44683491

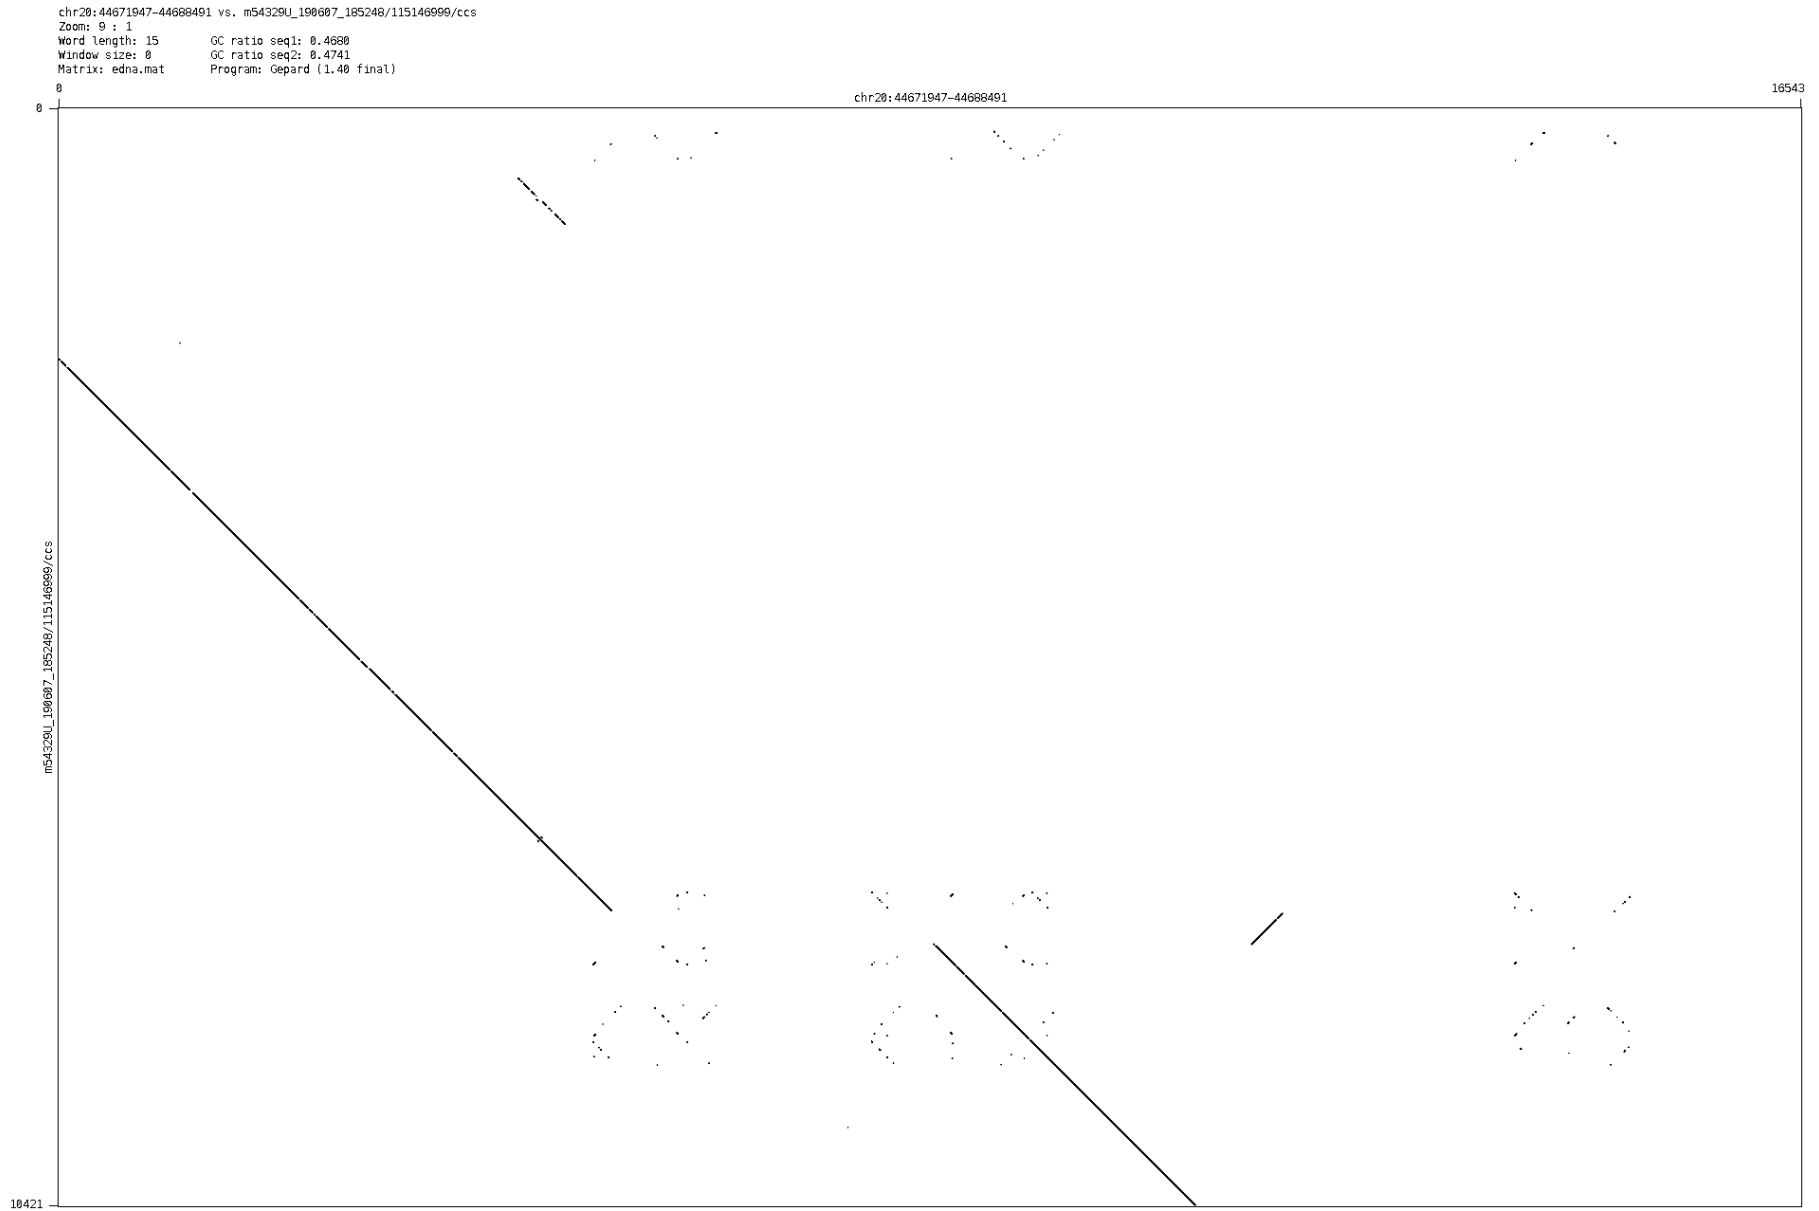

➤ chr20\_53204104\_53204269

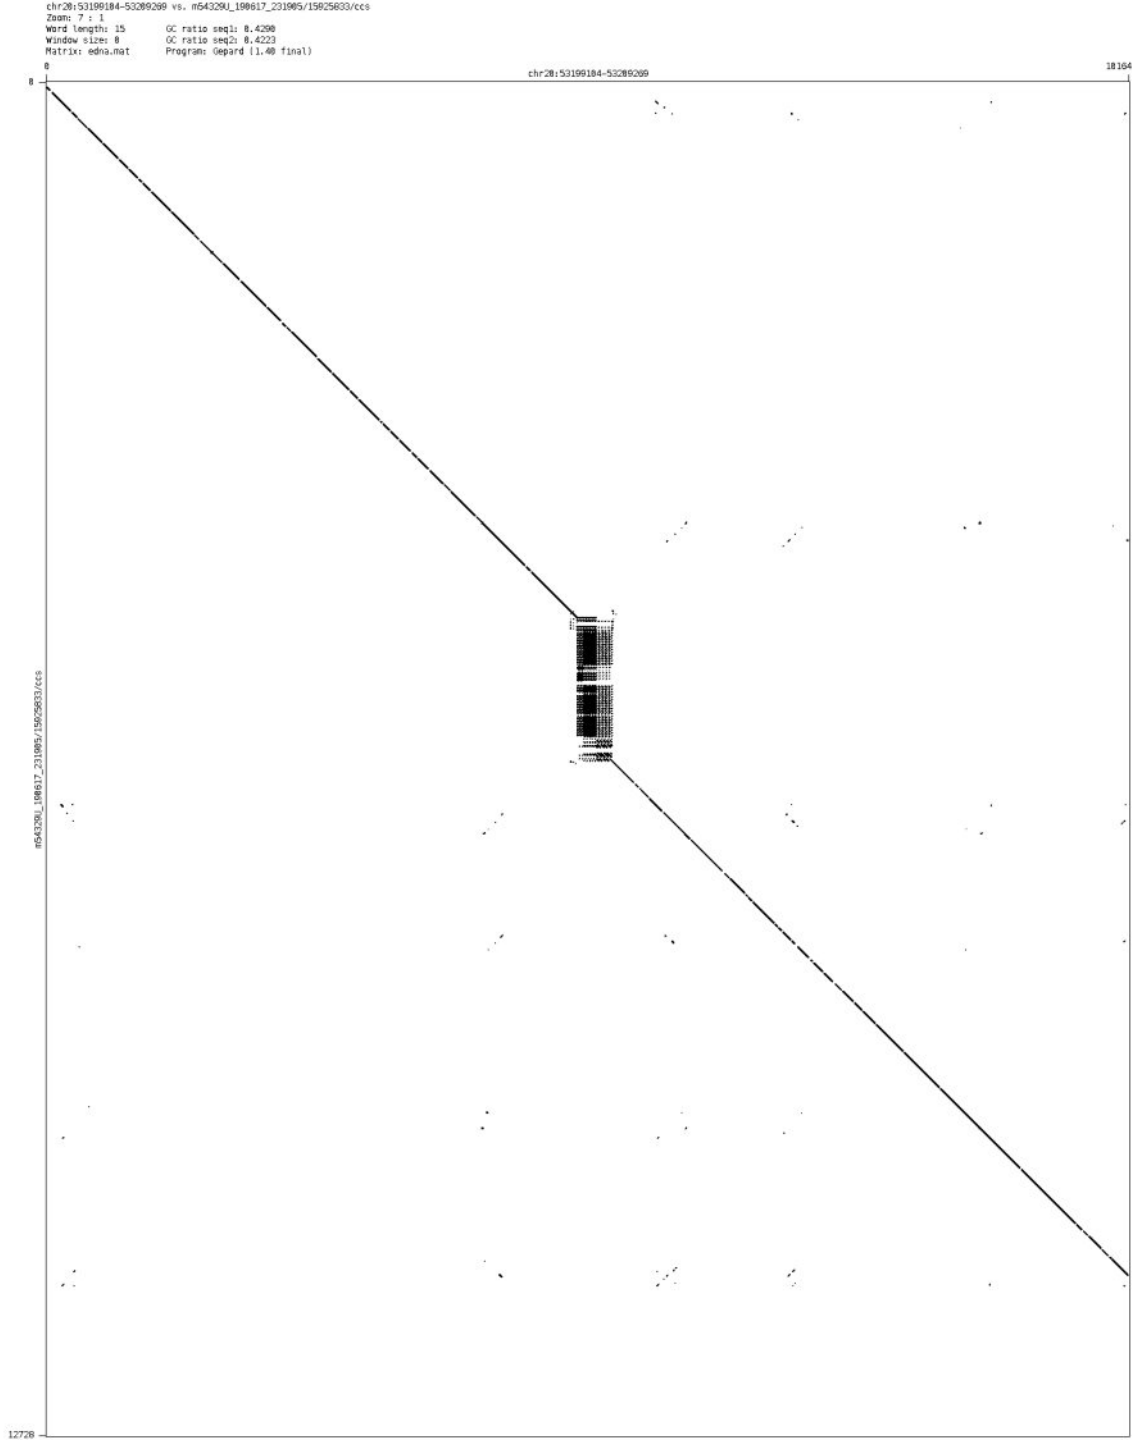

➤ chr20\_53837740\_53837850

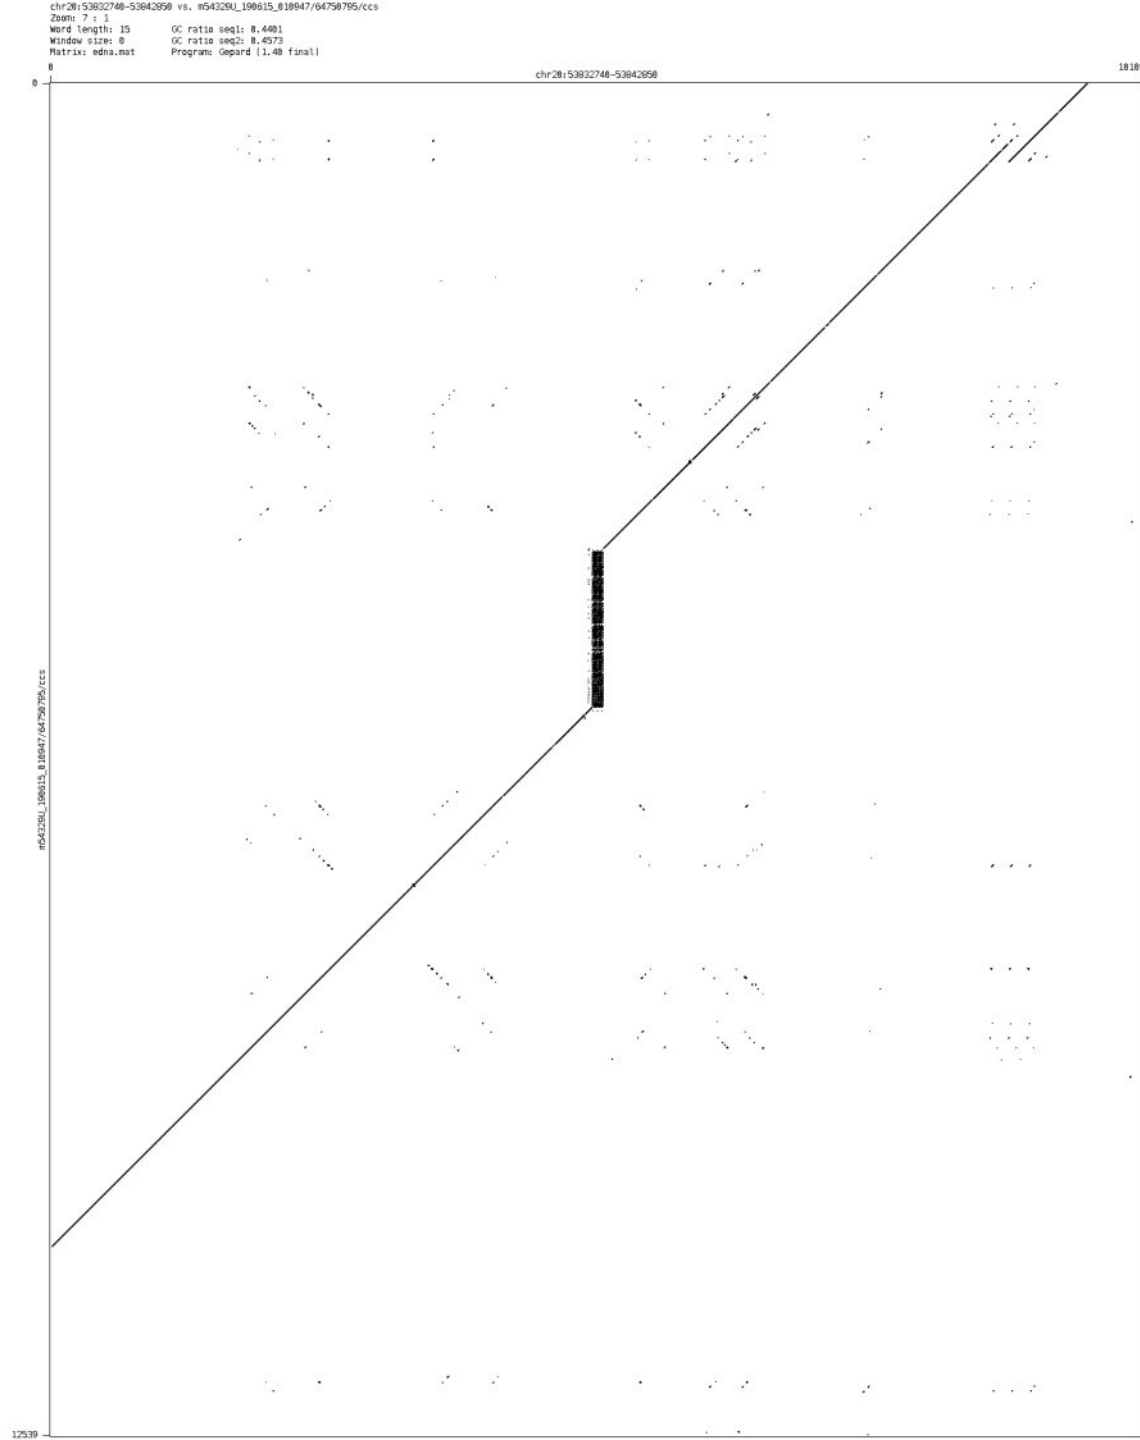

➤ chr20\_58695019\_58695331

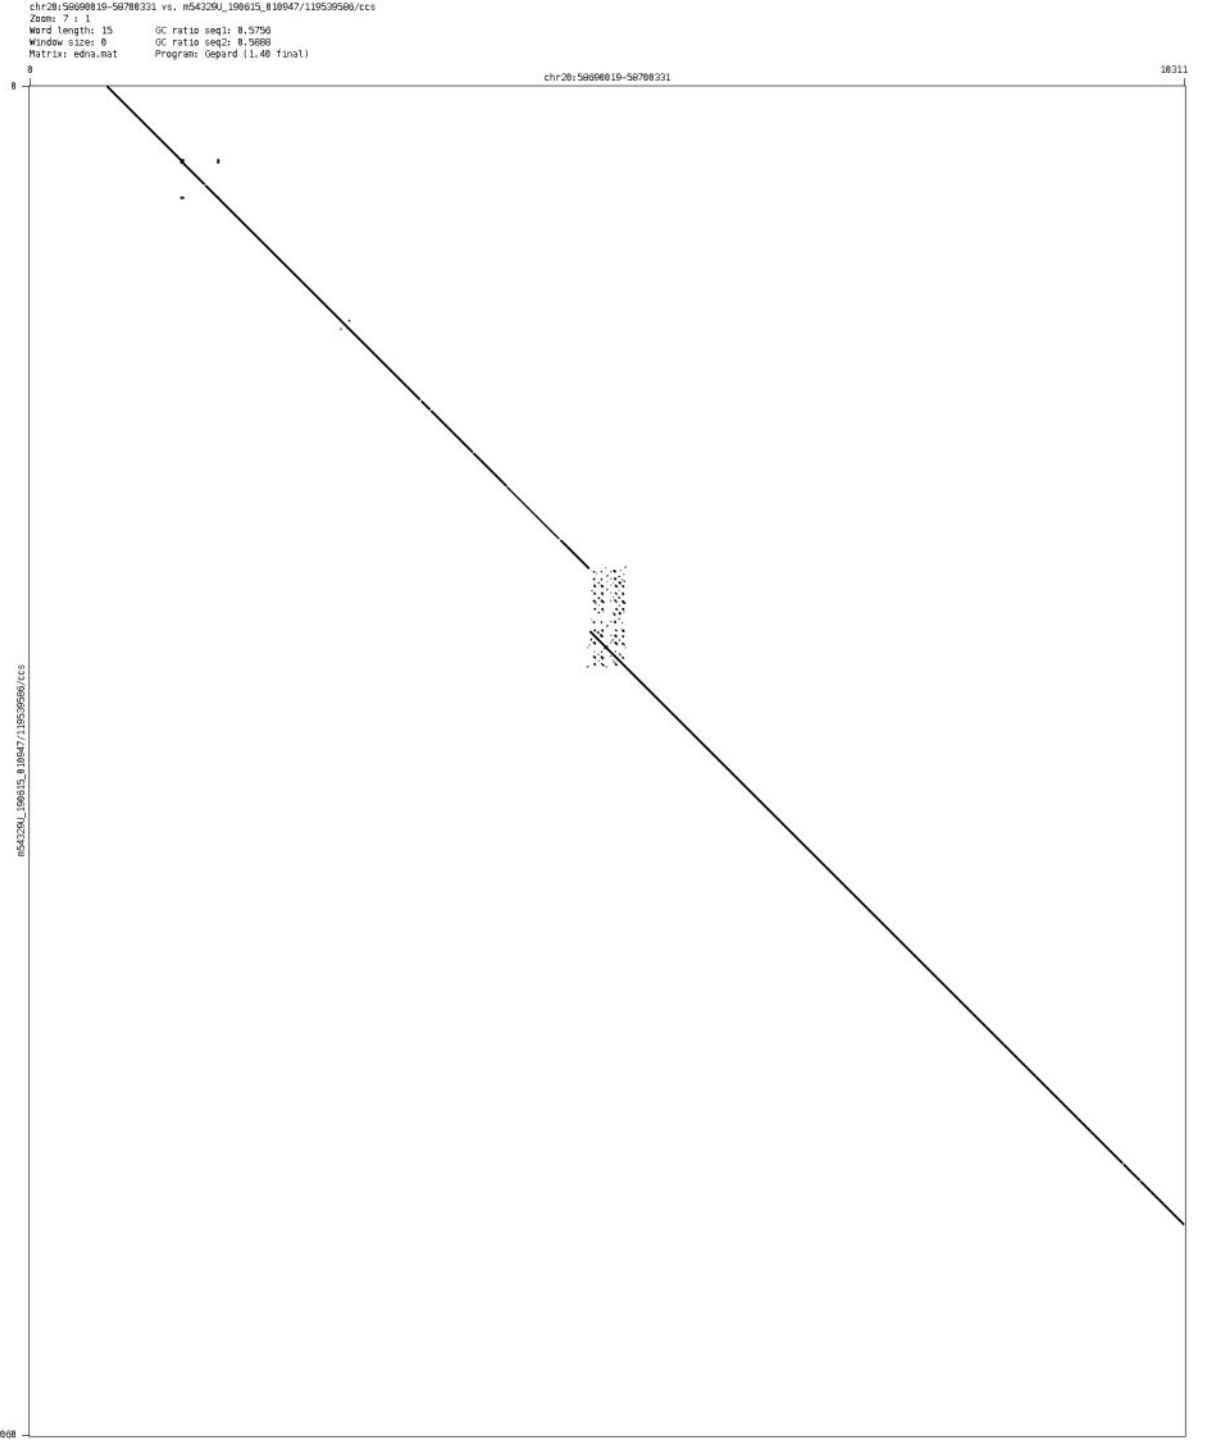

➤ chr20\_60314368\_60314789

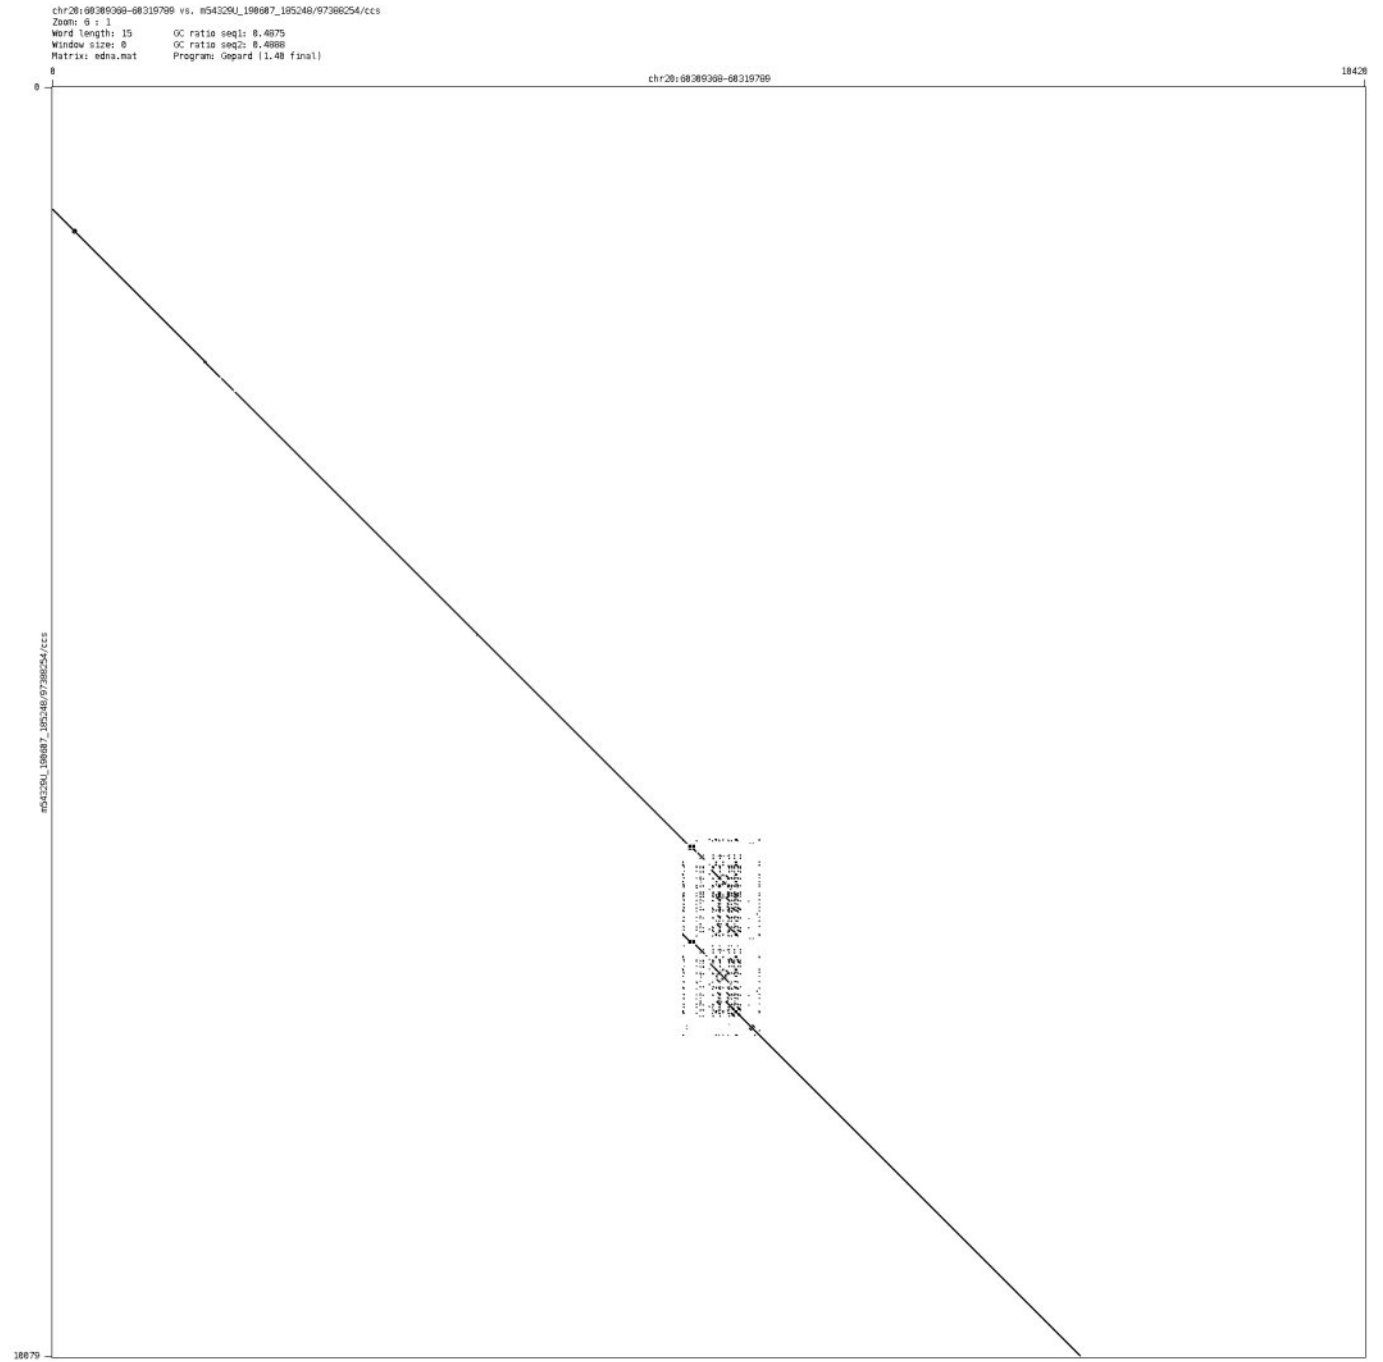



➤ chr20\_61202088\_61202234

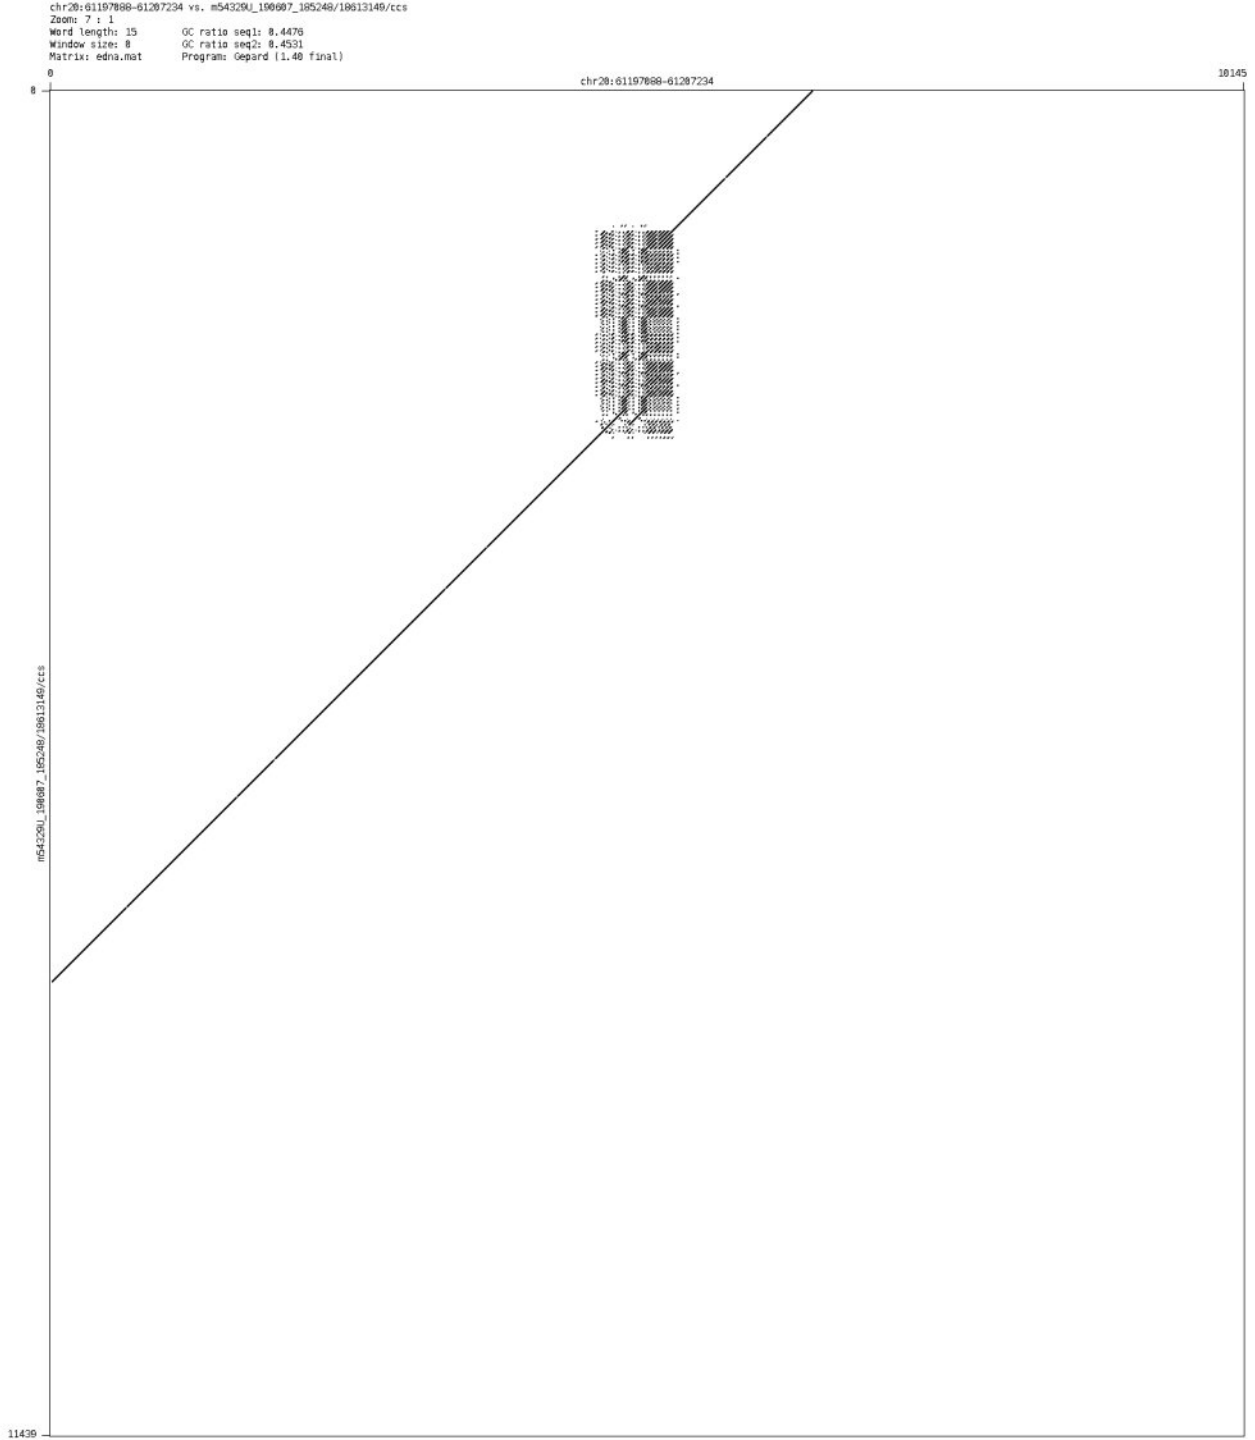

➤ chr20\_61329291\_61329439

chr20:61324291-61334439 vs. m54329U\_198097\_165248/62231179/ccs  
Zoom: 6 : 1  
Word length: 15 GC ratio seq1: 0.4934  
Window size: 8 GC ratio seq2: 0.4914  
Matrix: edna.mat Program: Gepard (1.48 final)

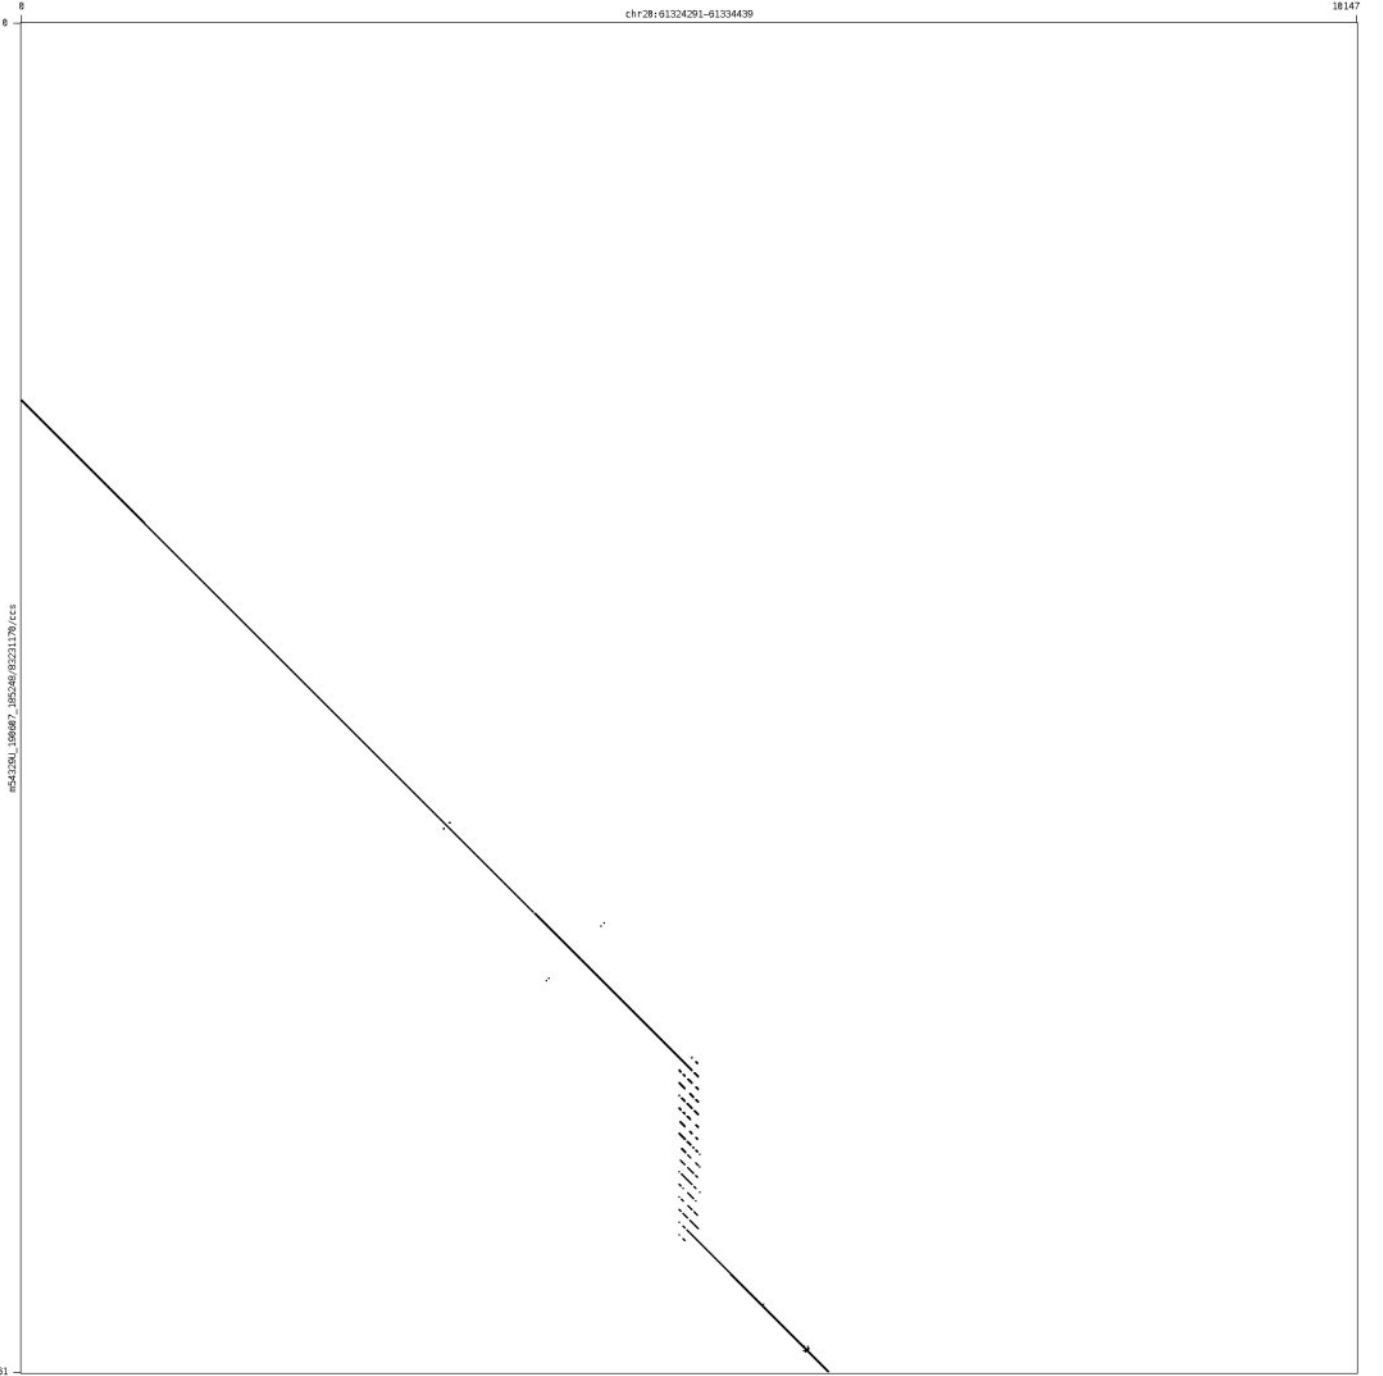

➤ chr20\_61331578\_61331692

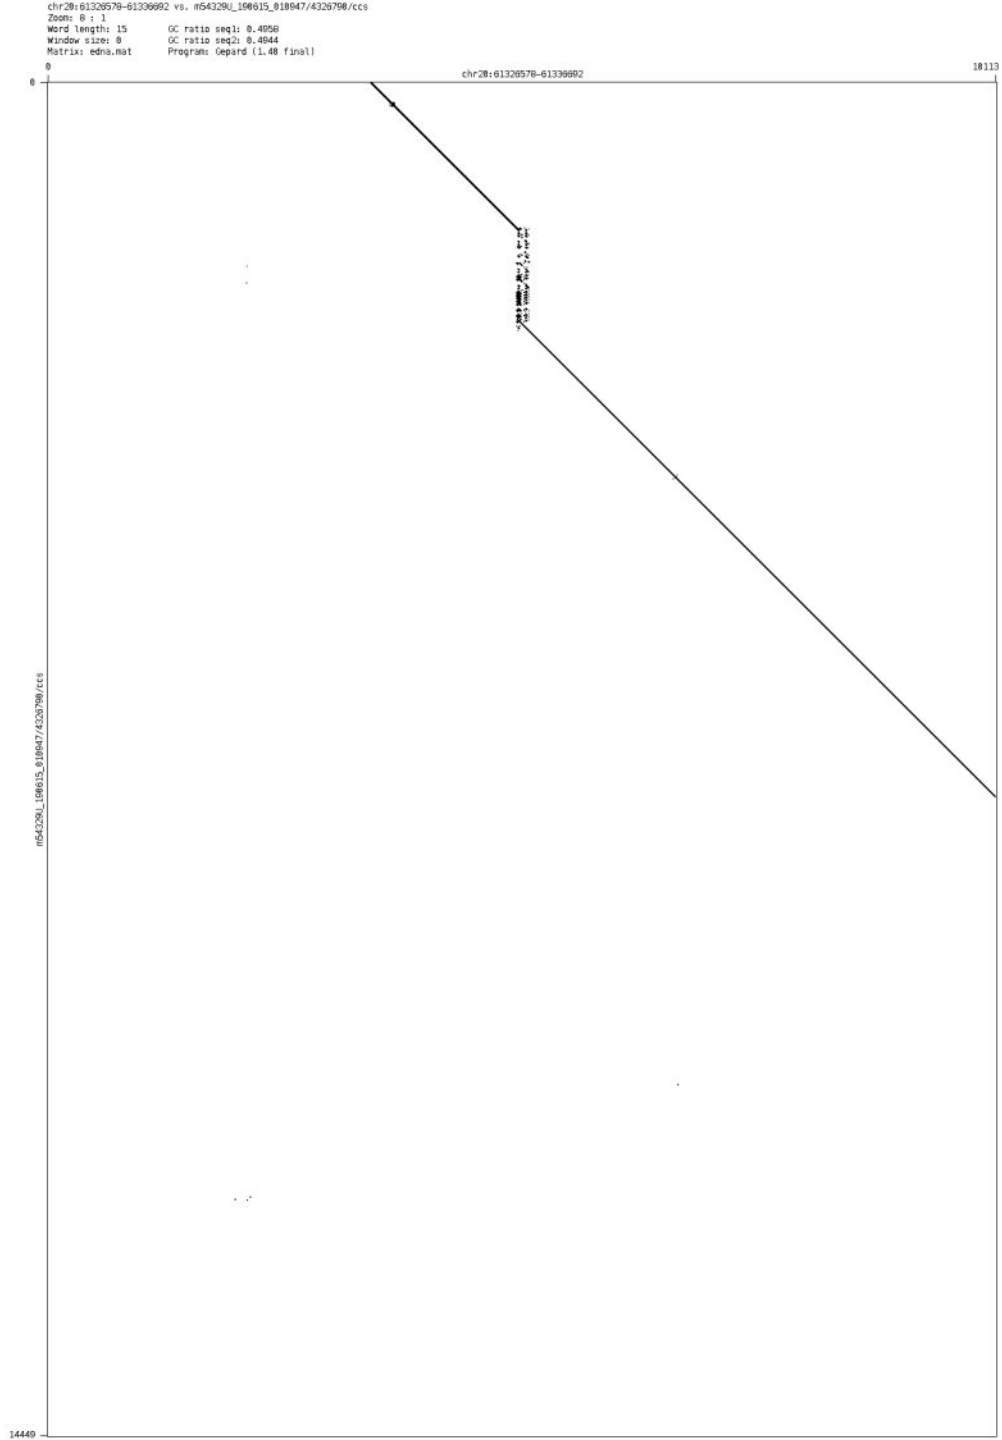

➤ chr20\_61375824\_61375997

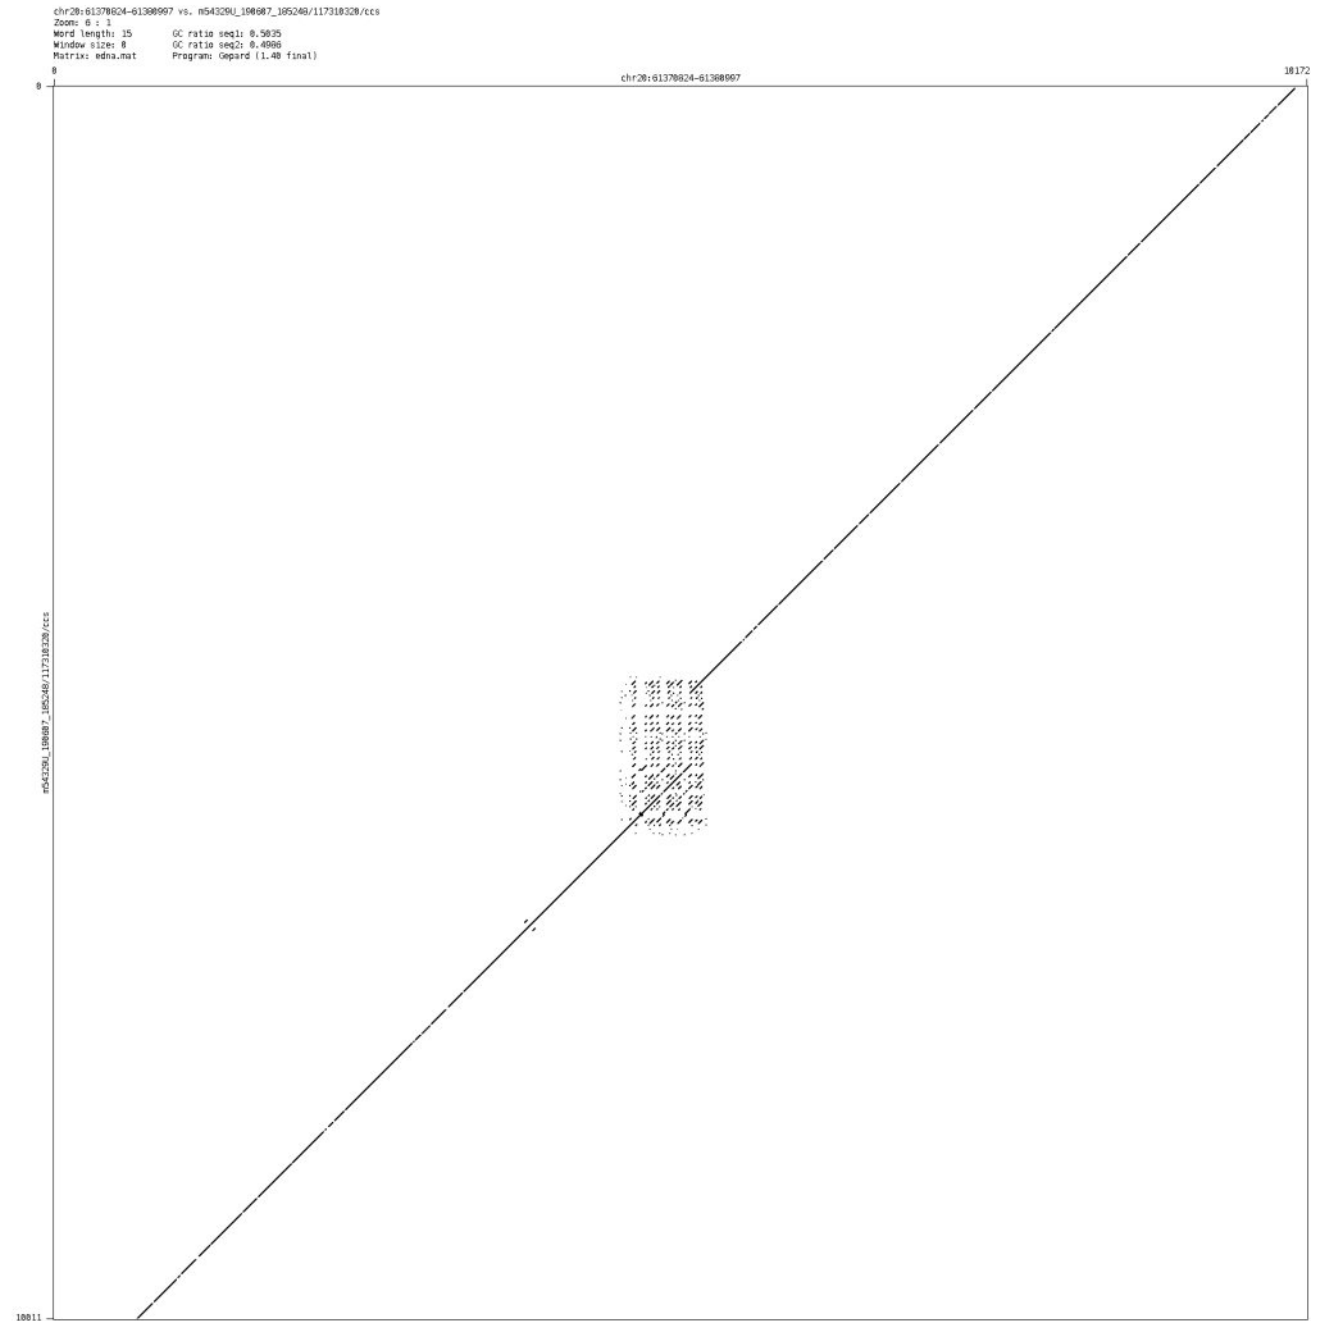

➤ chr20\_63492299\_63492537

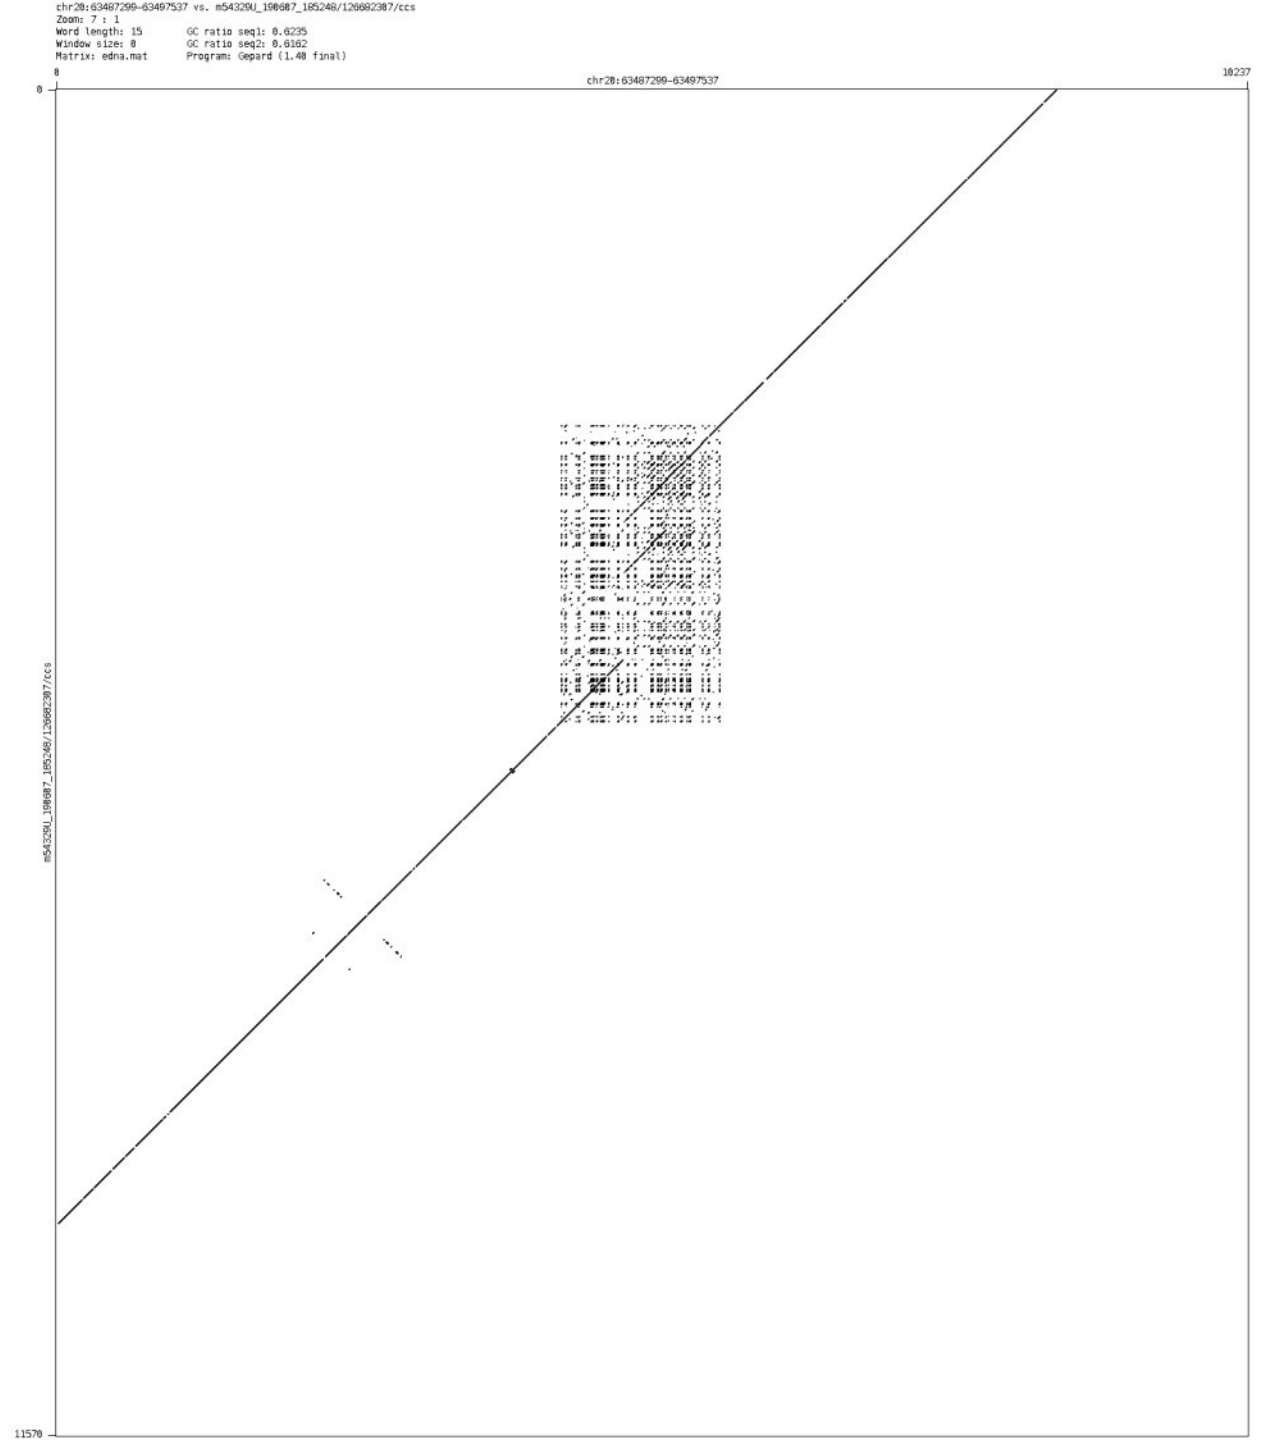

➤ chr20\_63693538\_63693676

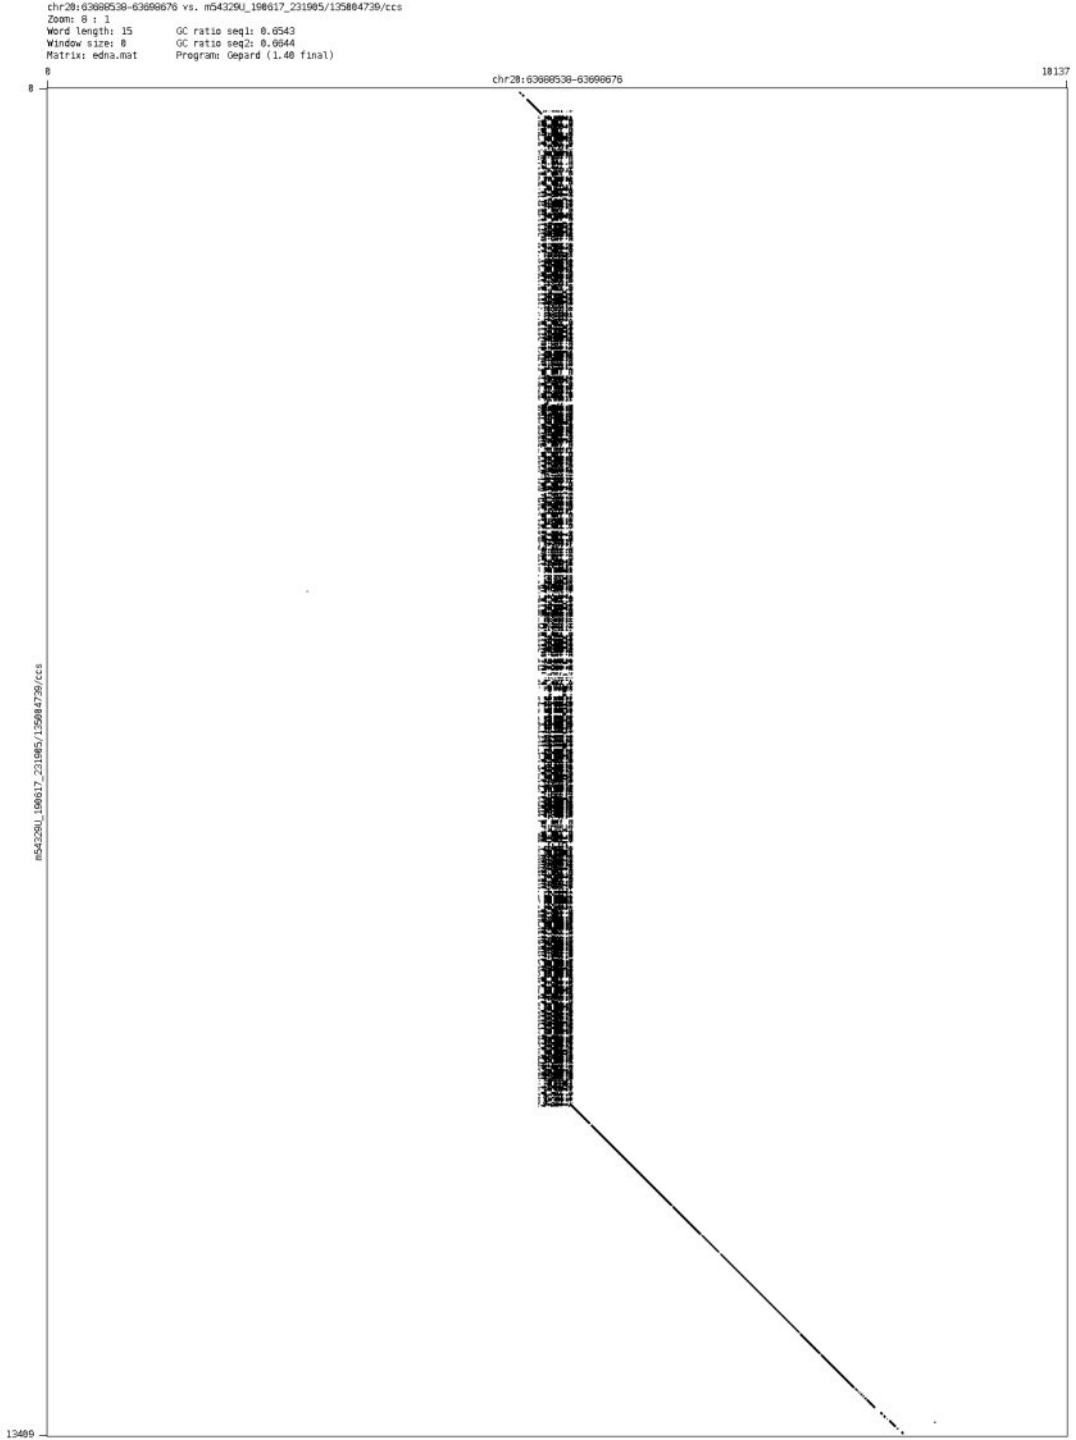

➤ chr20\_64088663\_64088895

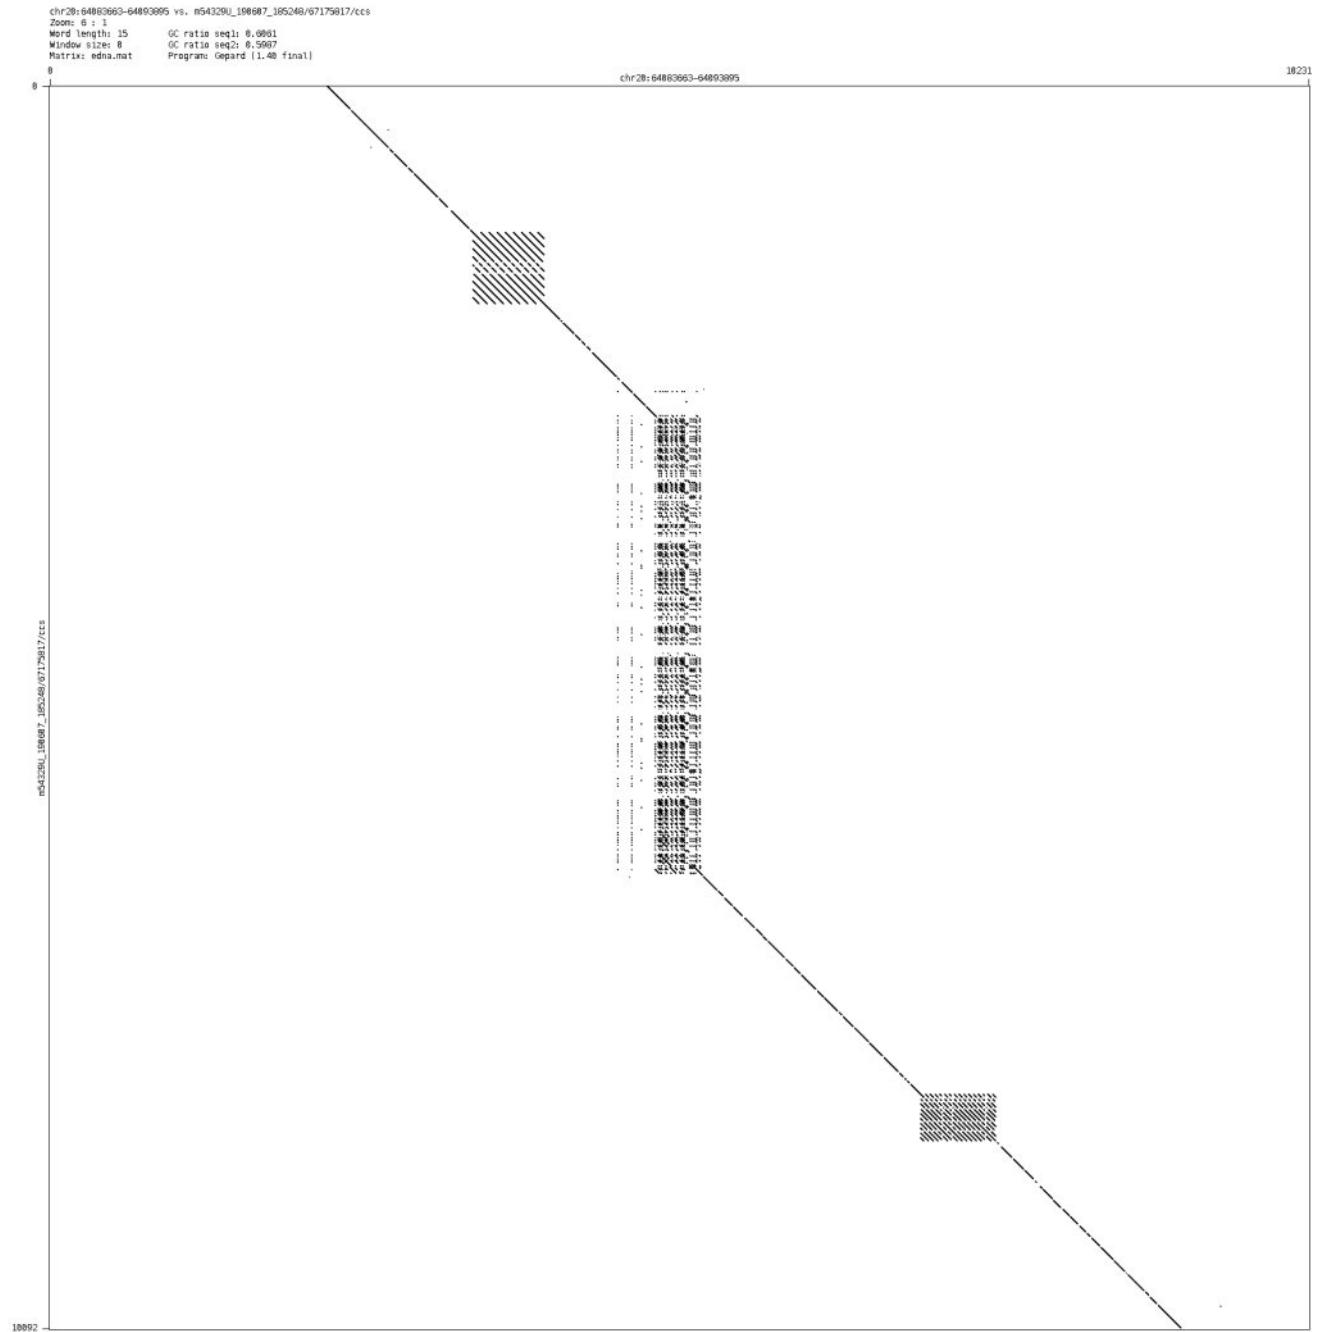

➤ chr20\_64096926\_64097053

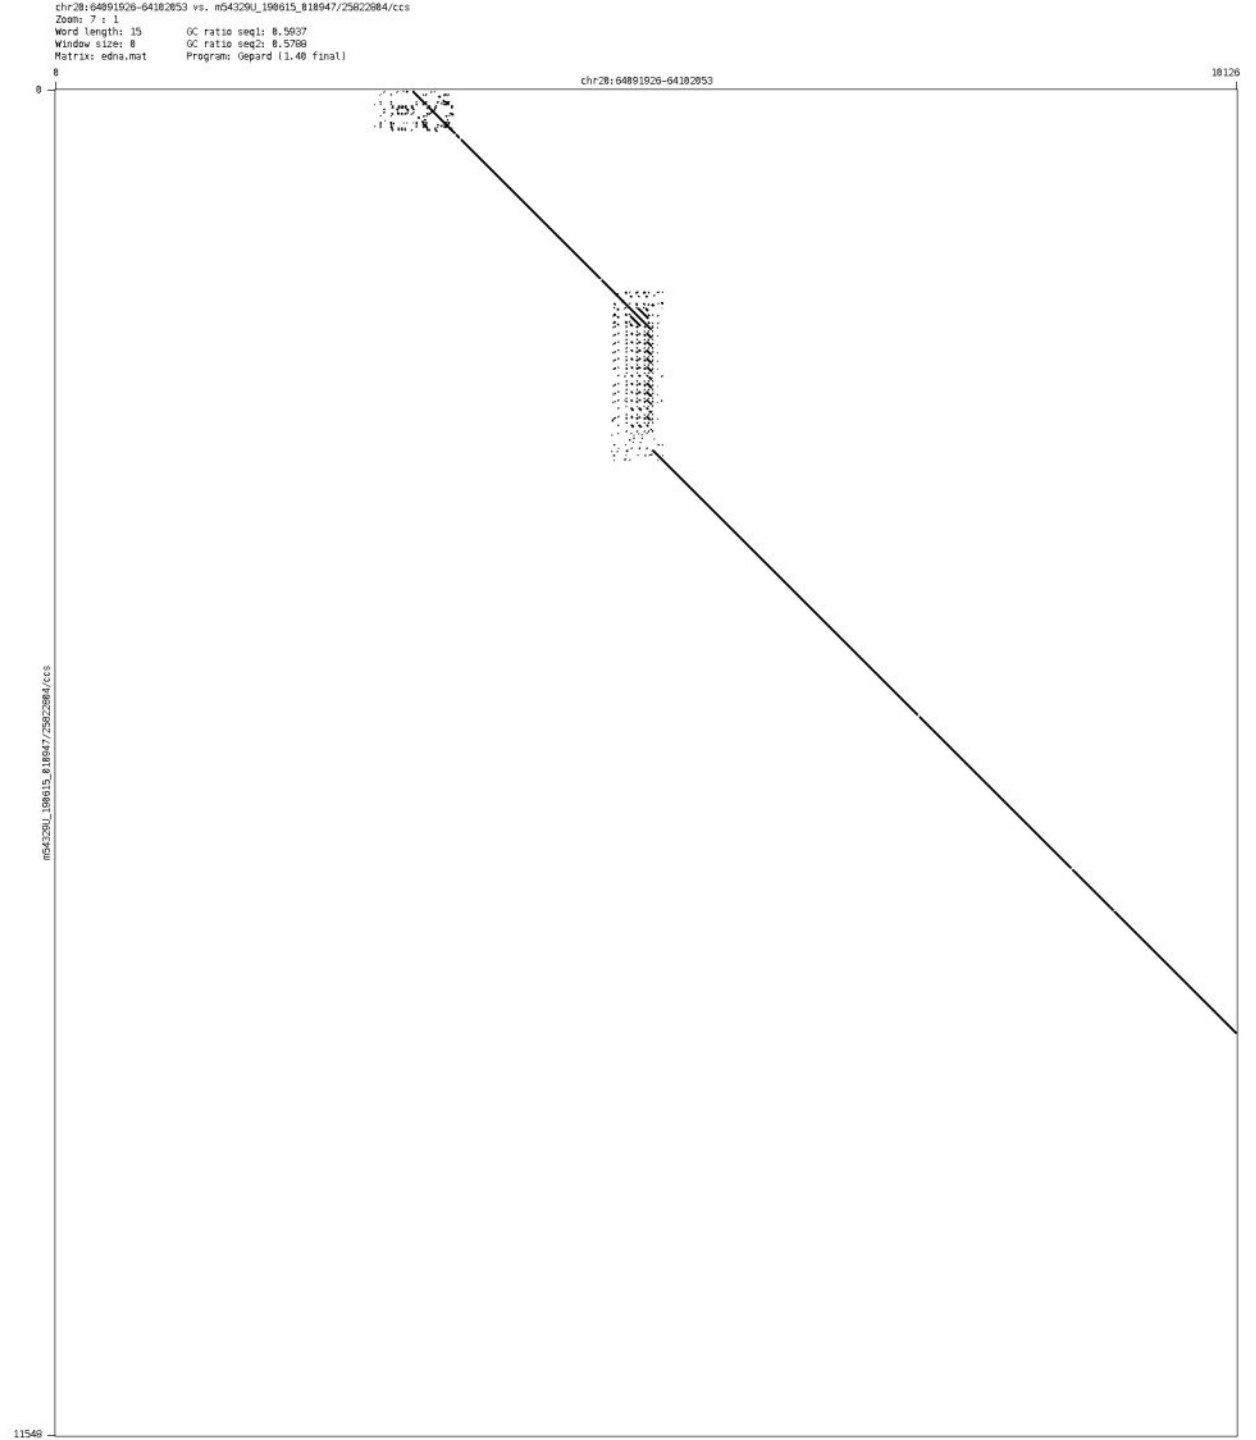



➤ chr21\_24391466\_24392454

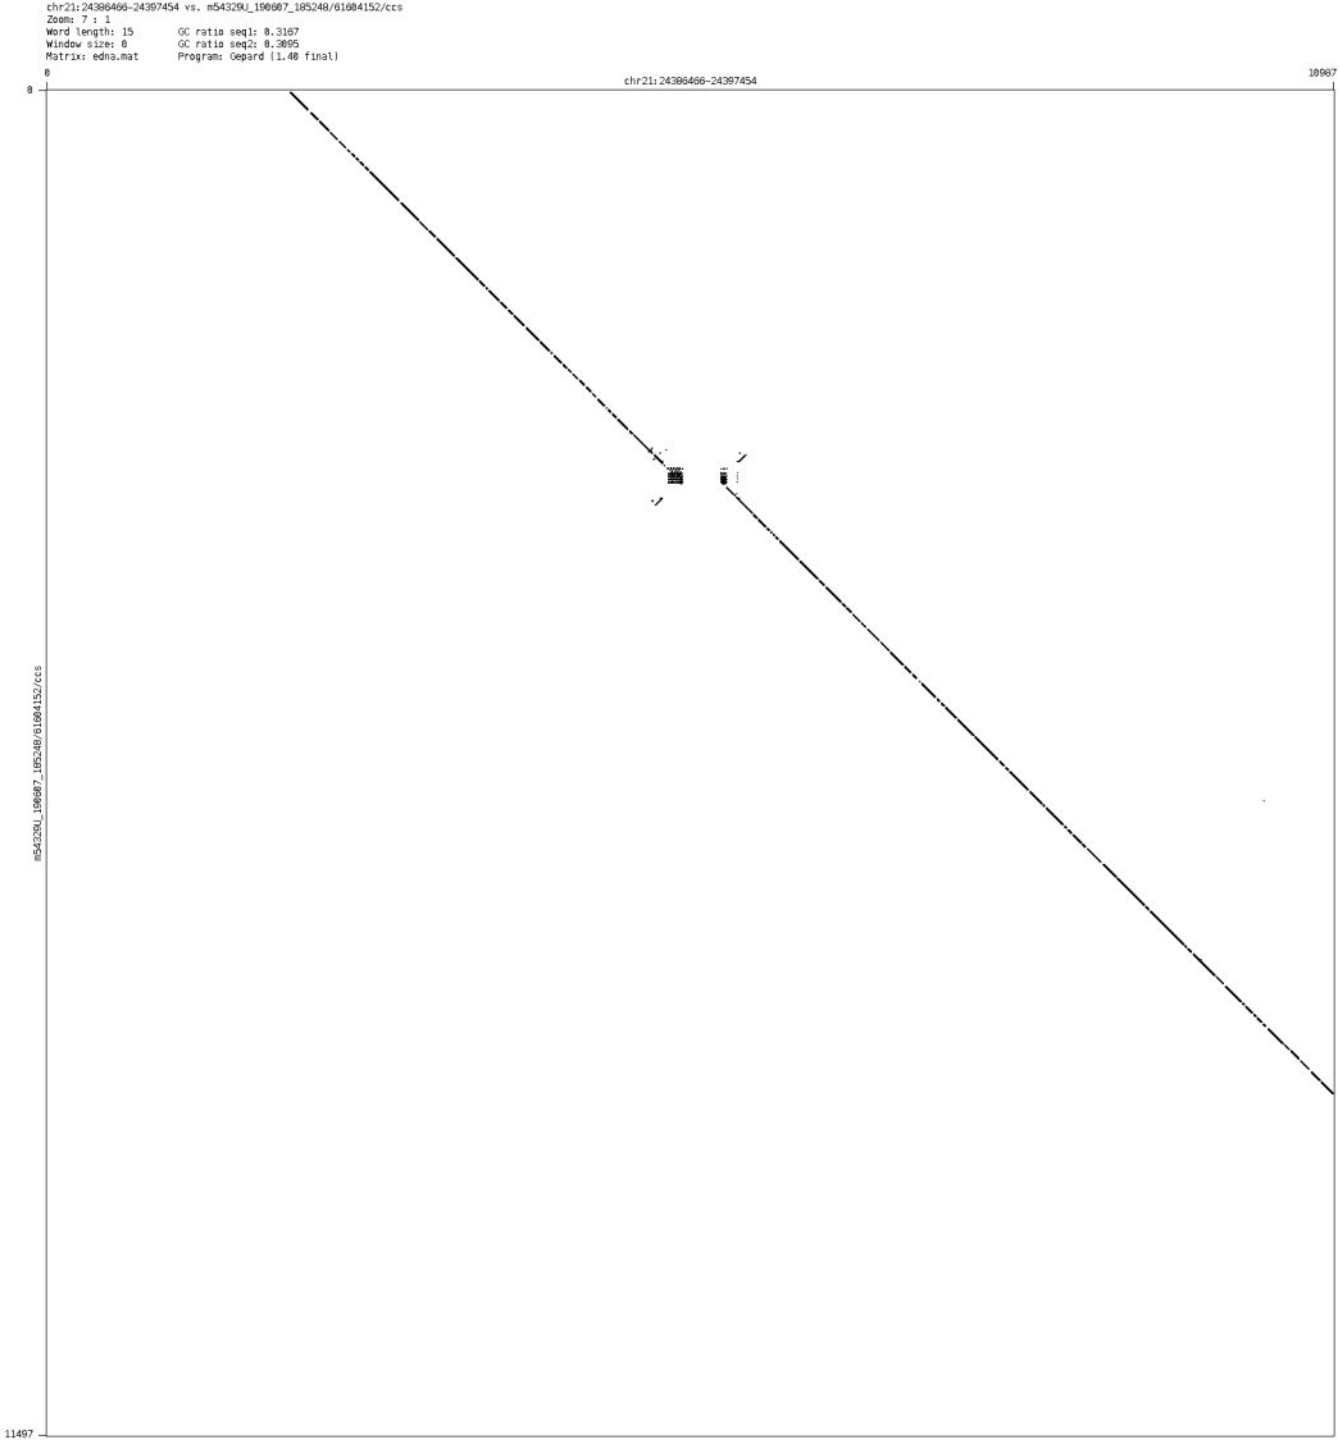

➤ chr21\_27627113\_27627278

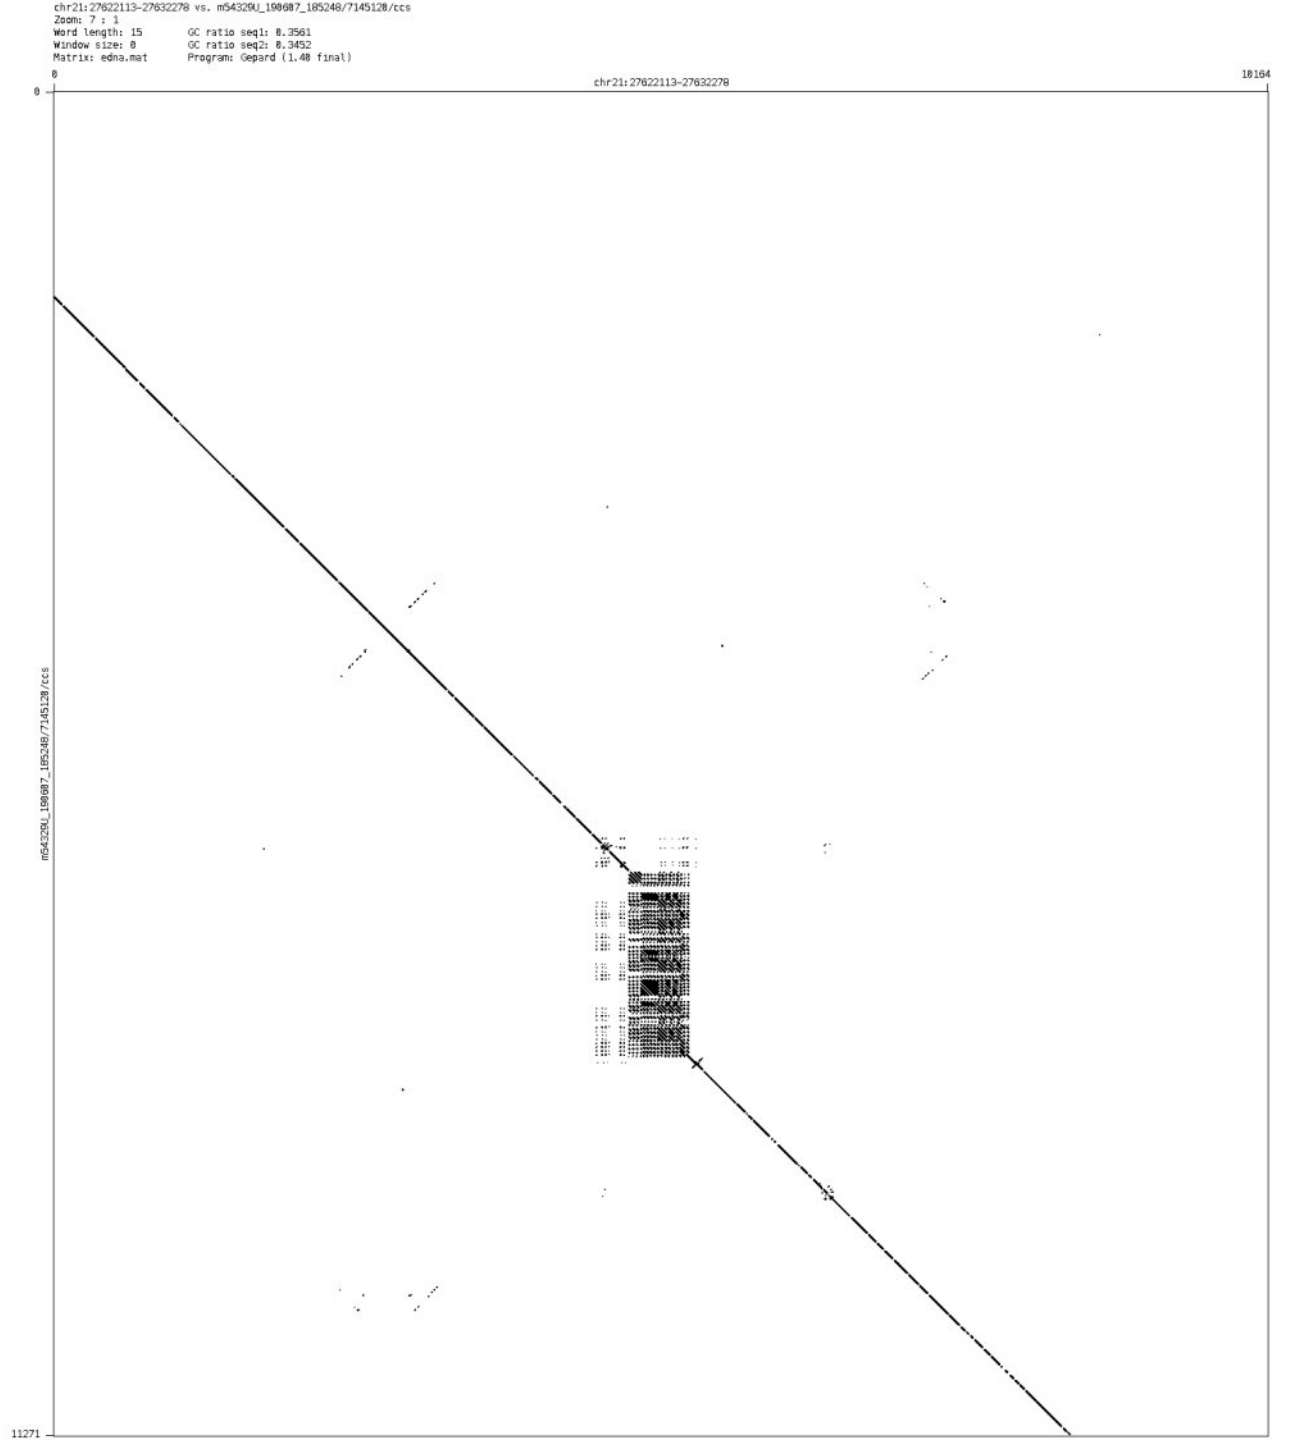

➤ chr21\_31784083\_31785382

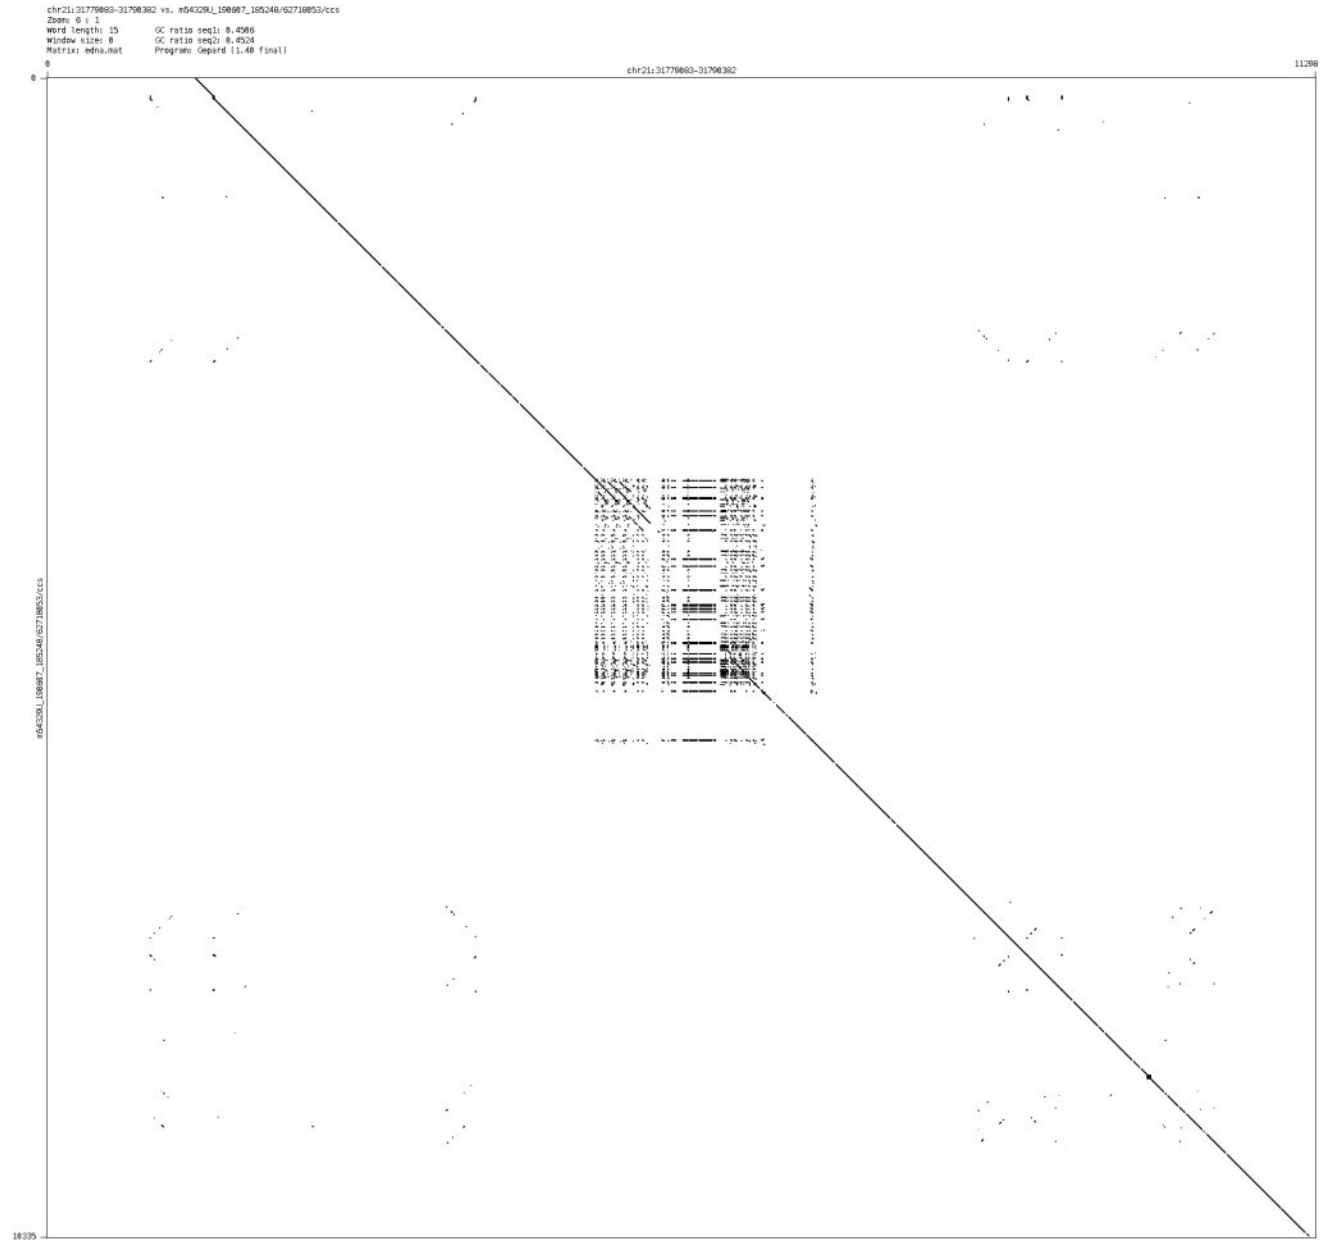

➤ chr21\_33322245\_33322788

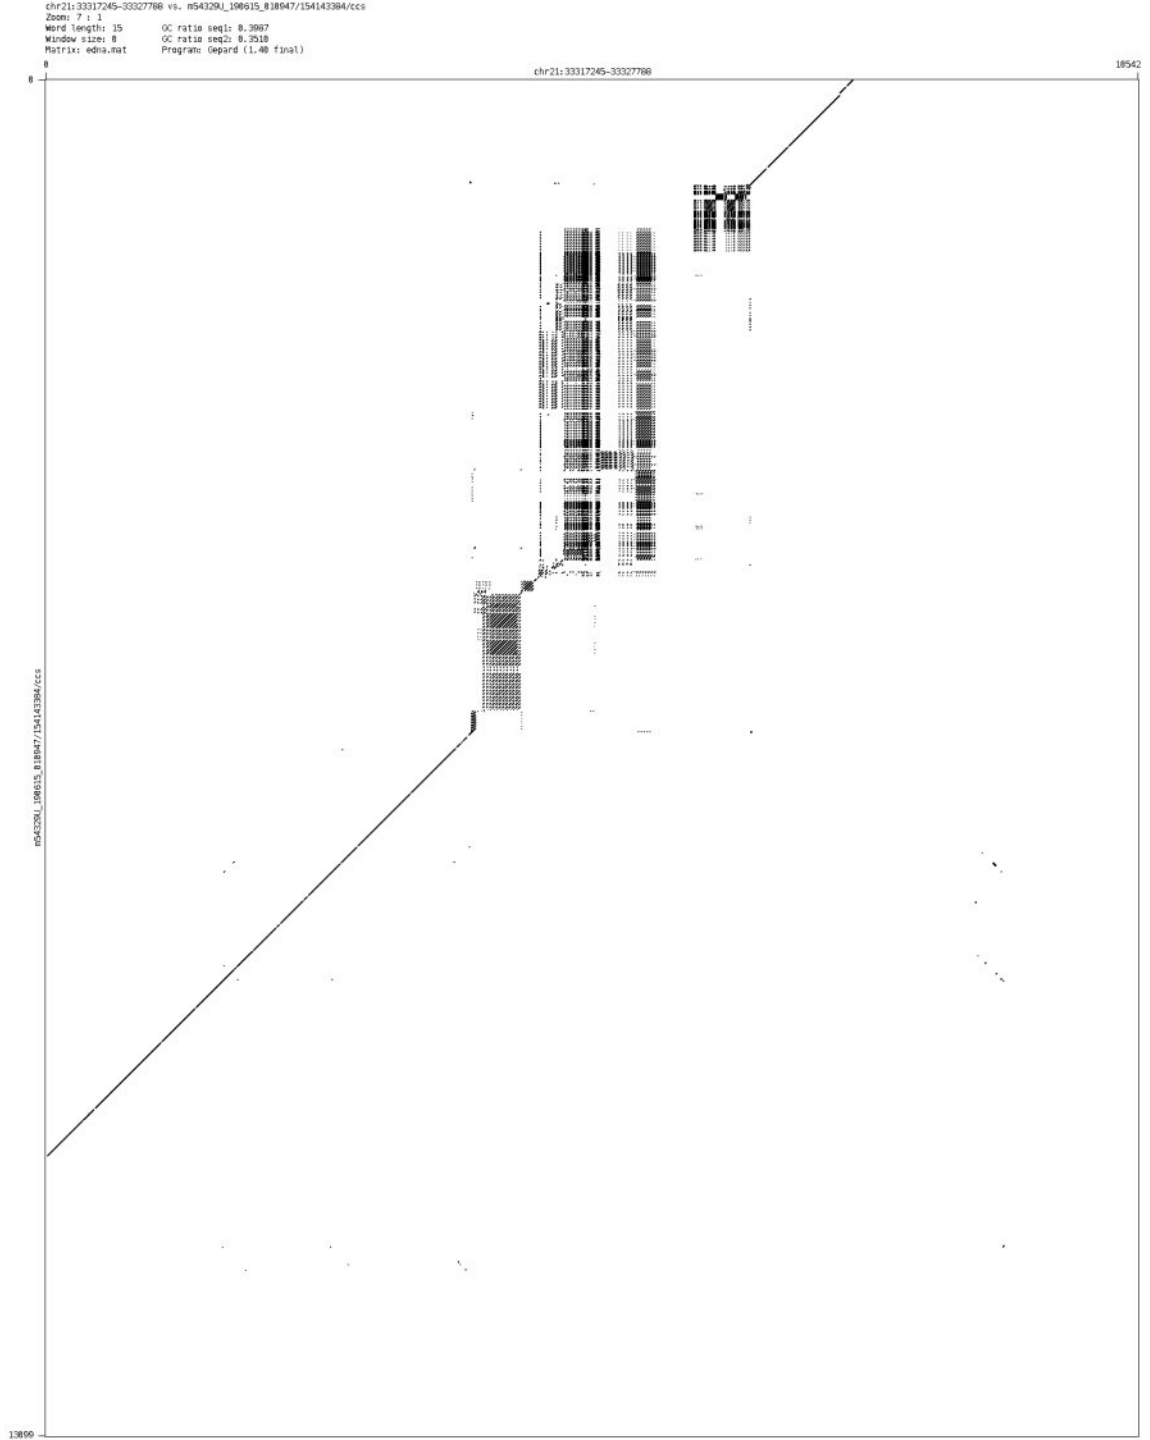

➤ chr21\_36497141\_36497270

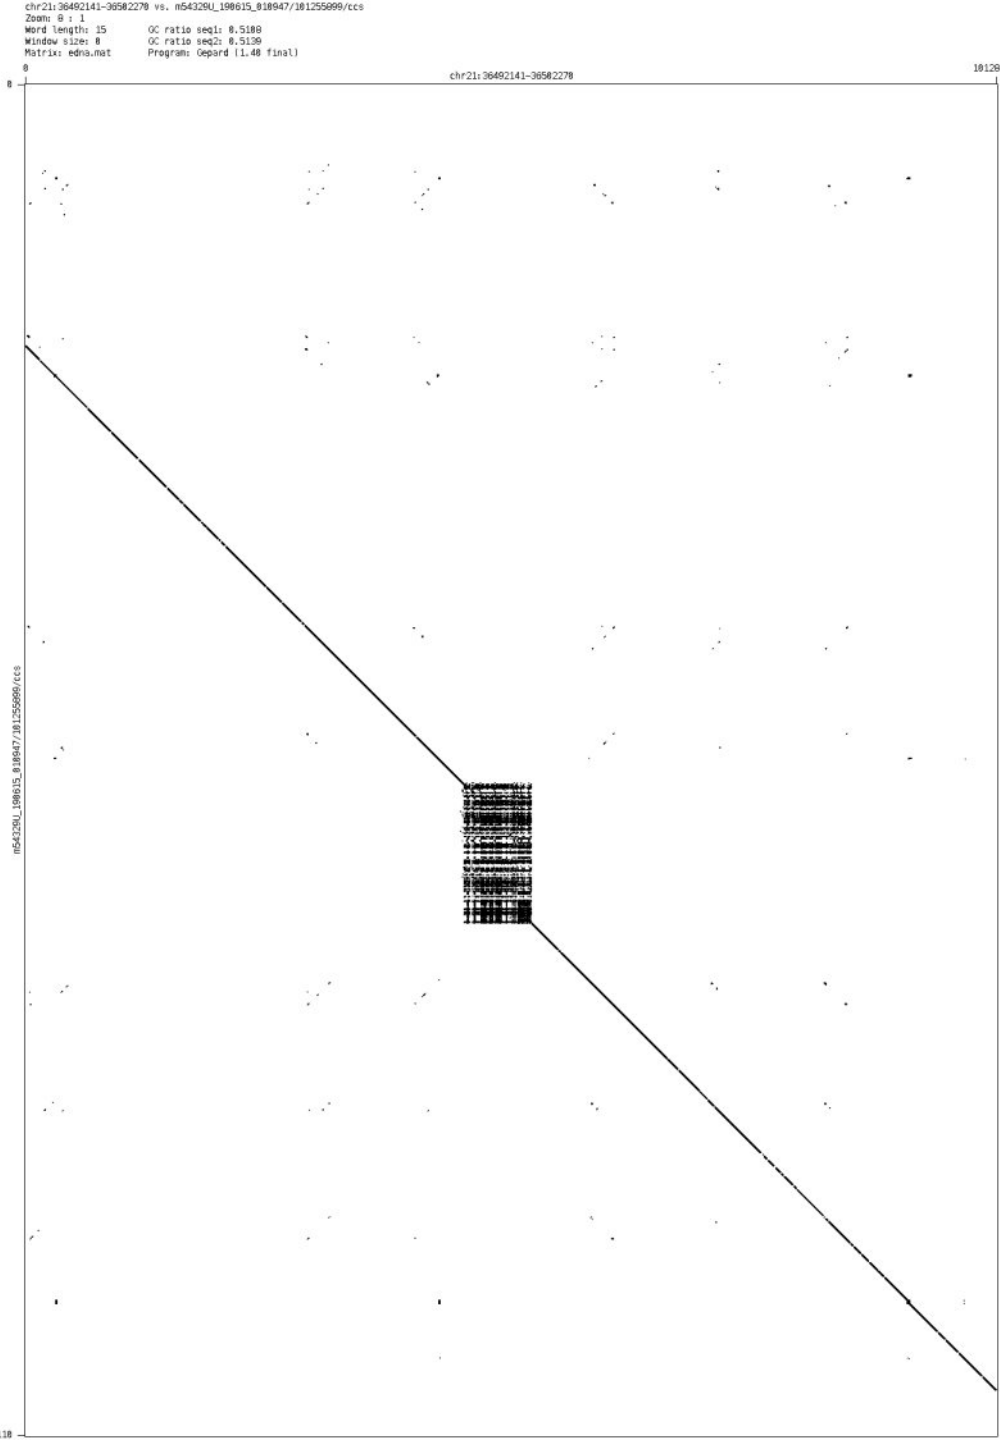

➤ chr21\_40348162\_40348388

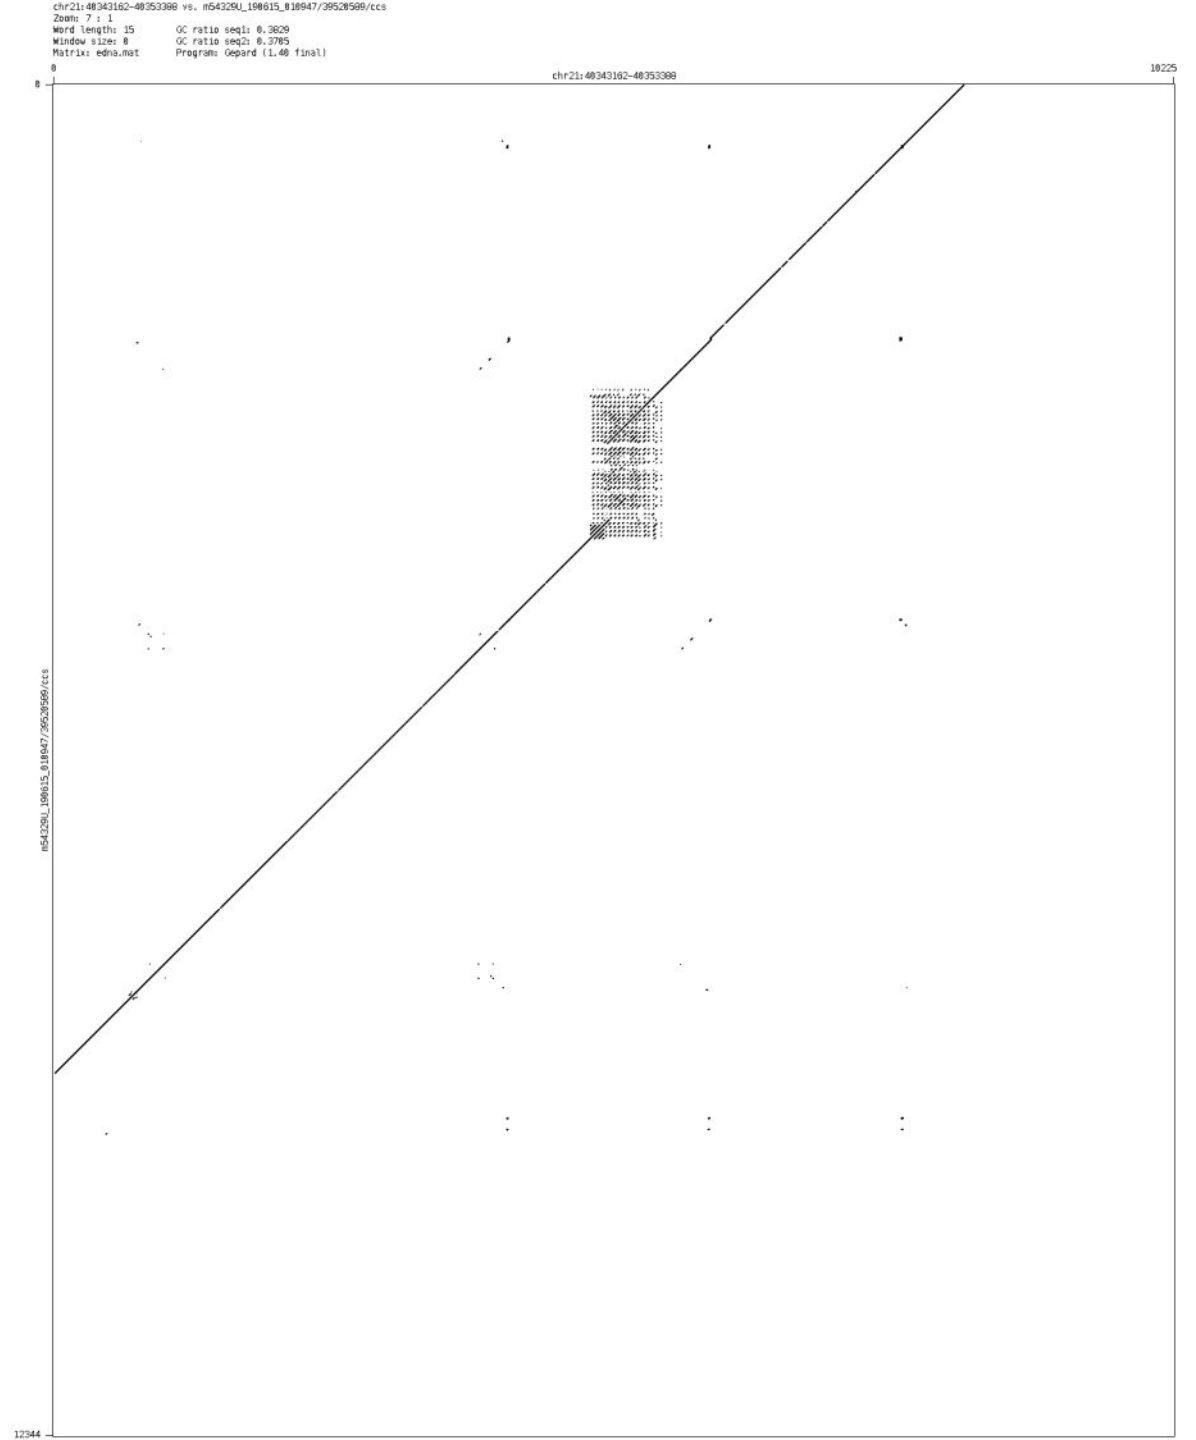

➤ chr21\_43262539\_43262718

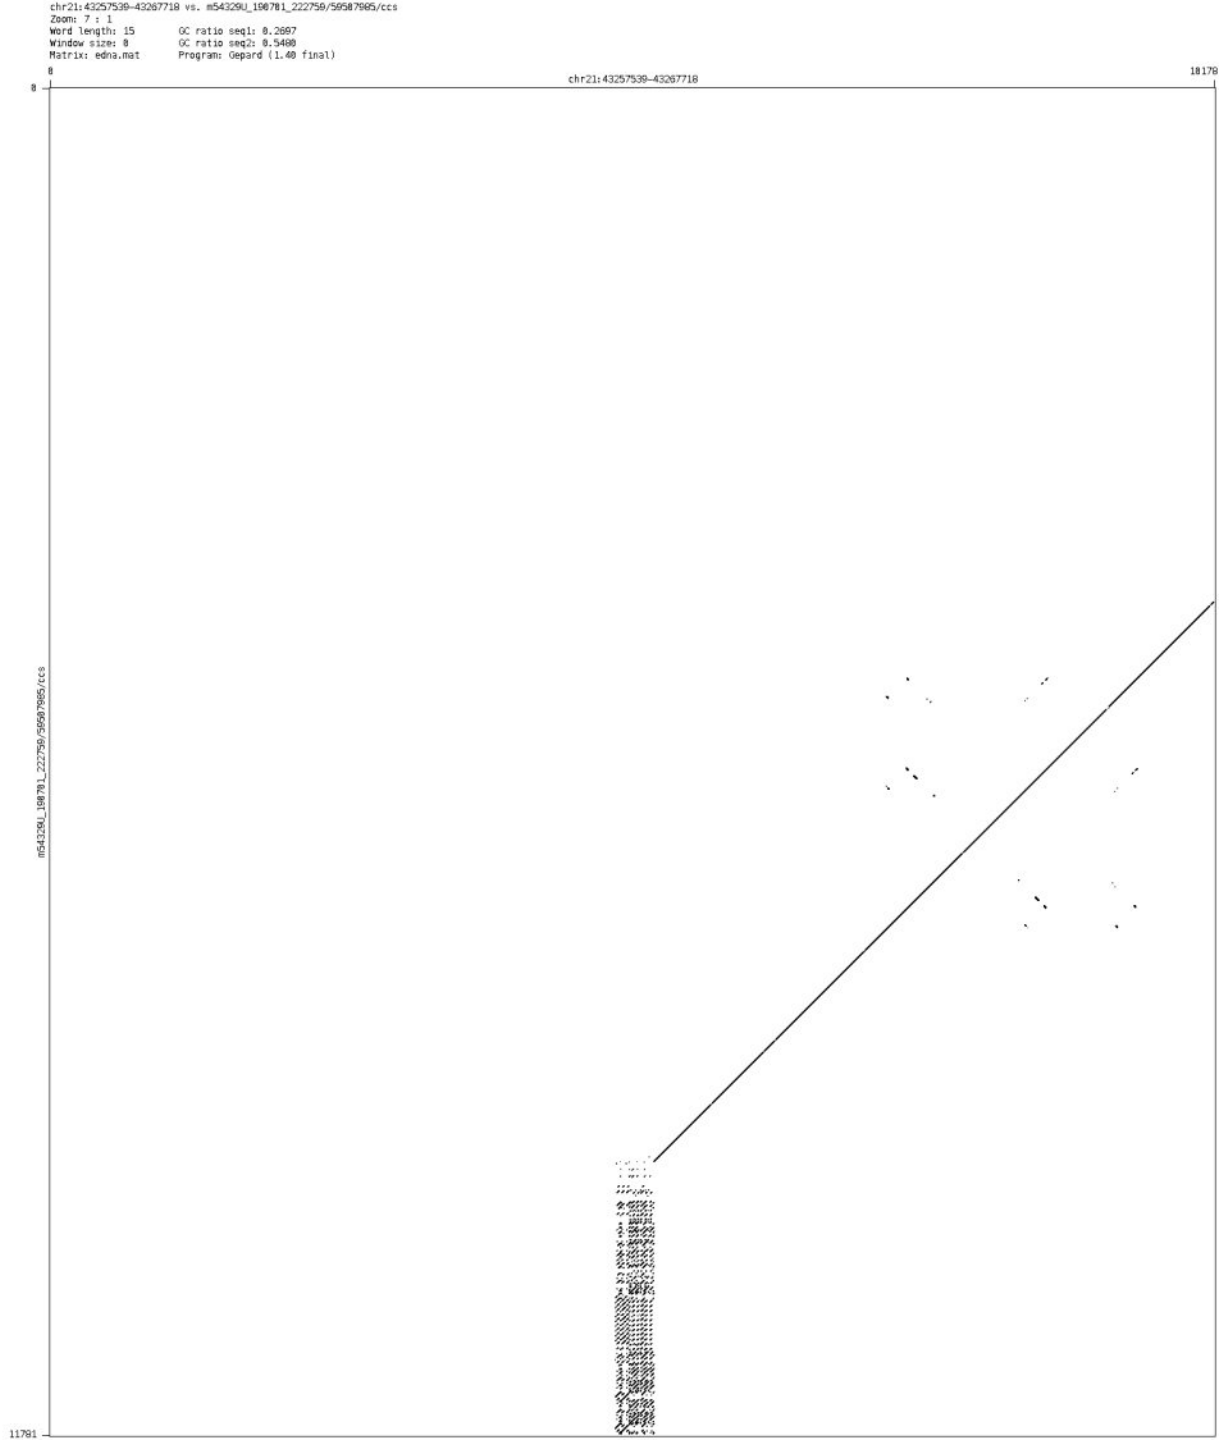

➤ chr21\_45055043\_45055102

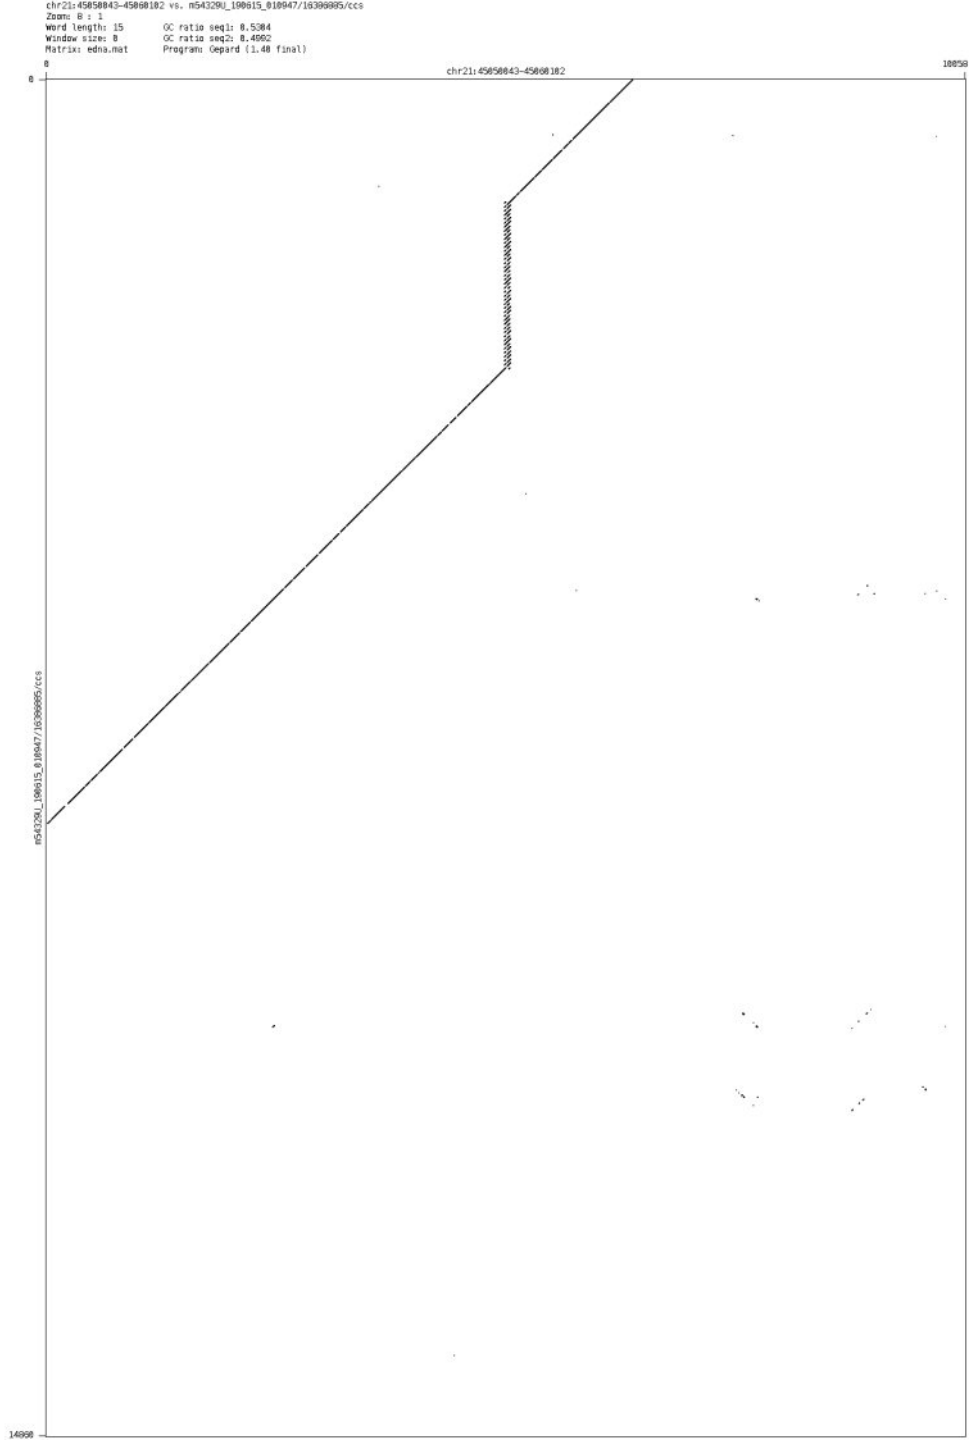



➤ chr21\_45156103\_45156277

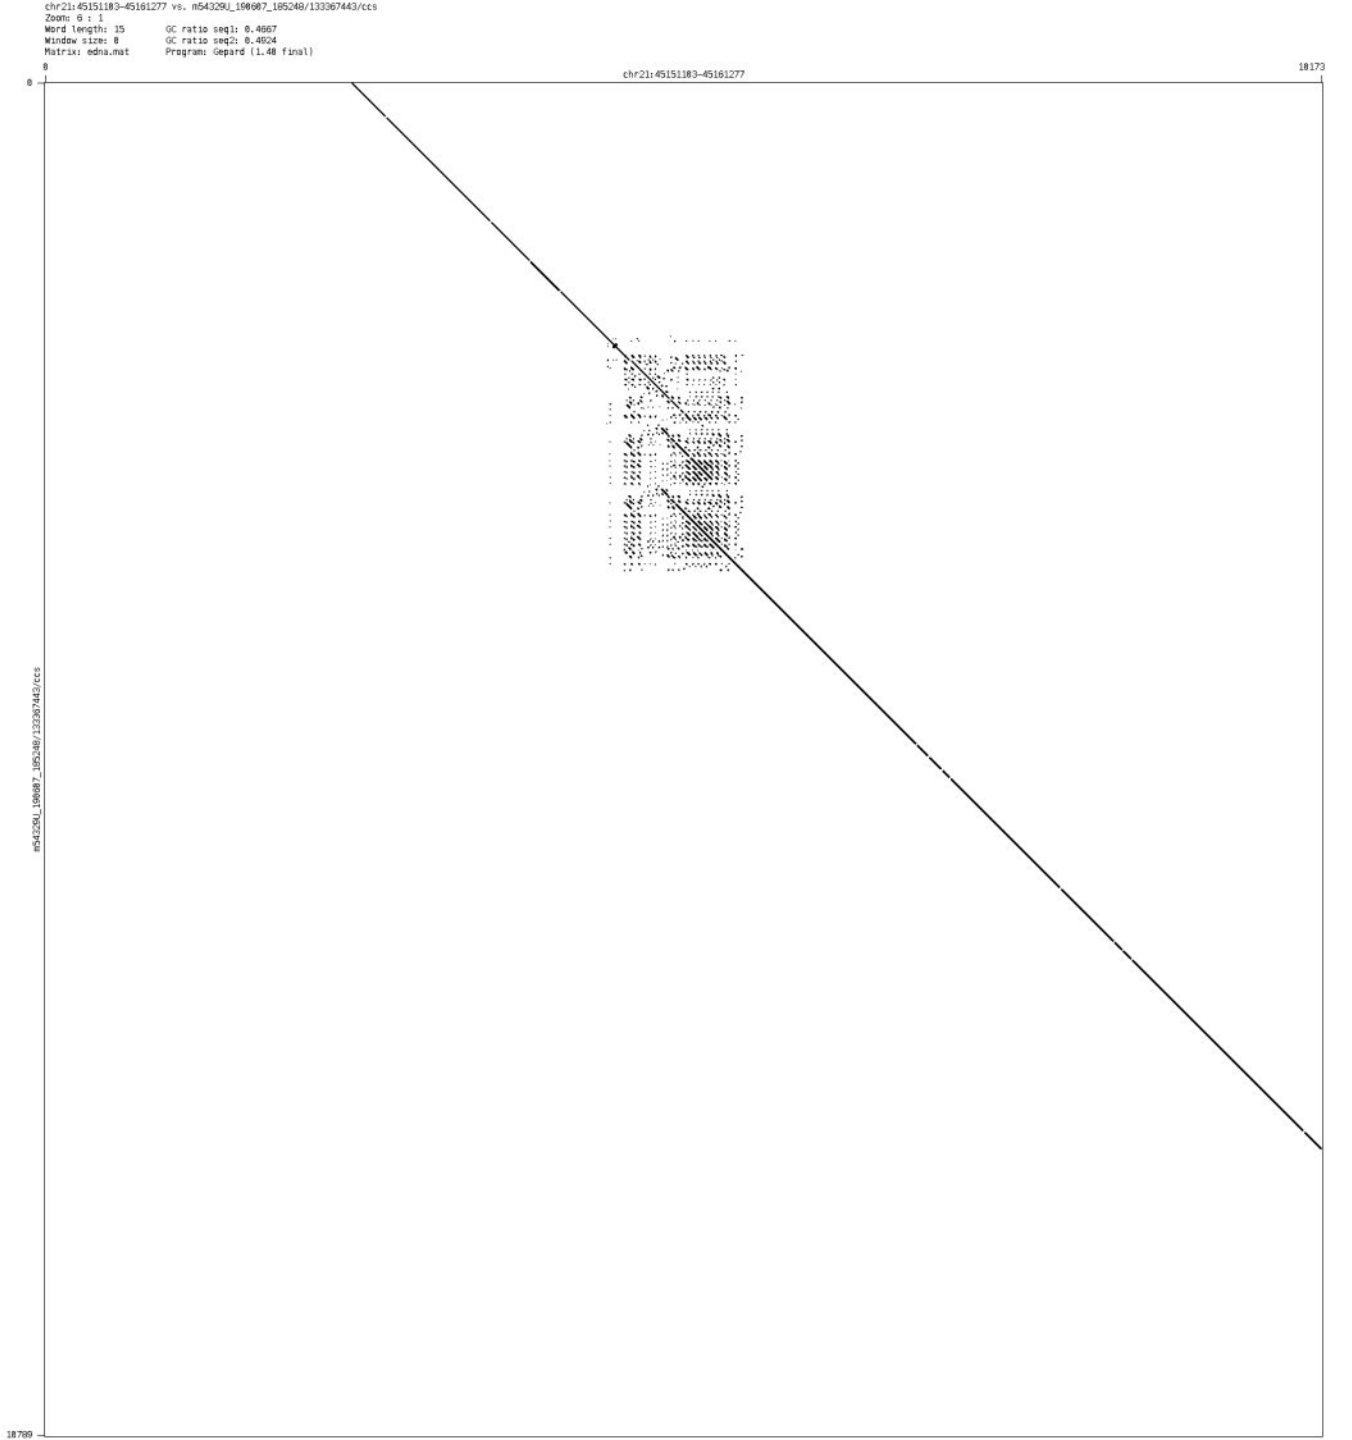

➤ chr21\_45797476\_45798540

chr21:45797476-45803540 vs. n543281\_180887\_185248/153602157/ccs  
Zoom: 6 : 1 GC ratio seq1: 0.4731  
Word length: 15 GC ratio seq2: 0.4928  
Window size: 8 Program: cepd (1.48 final)  
Matrix: edna.mat

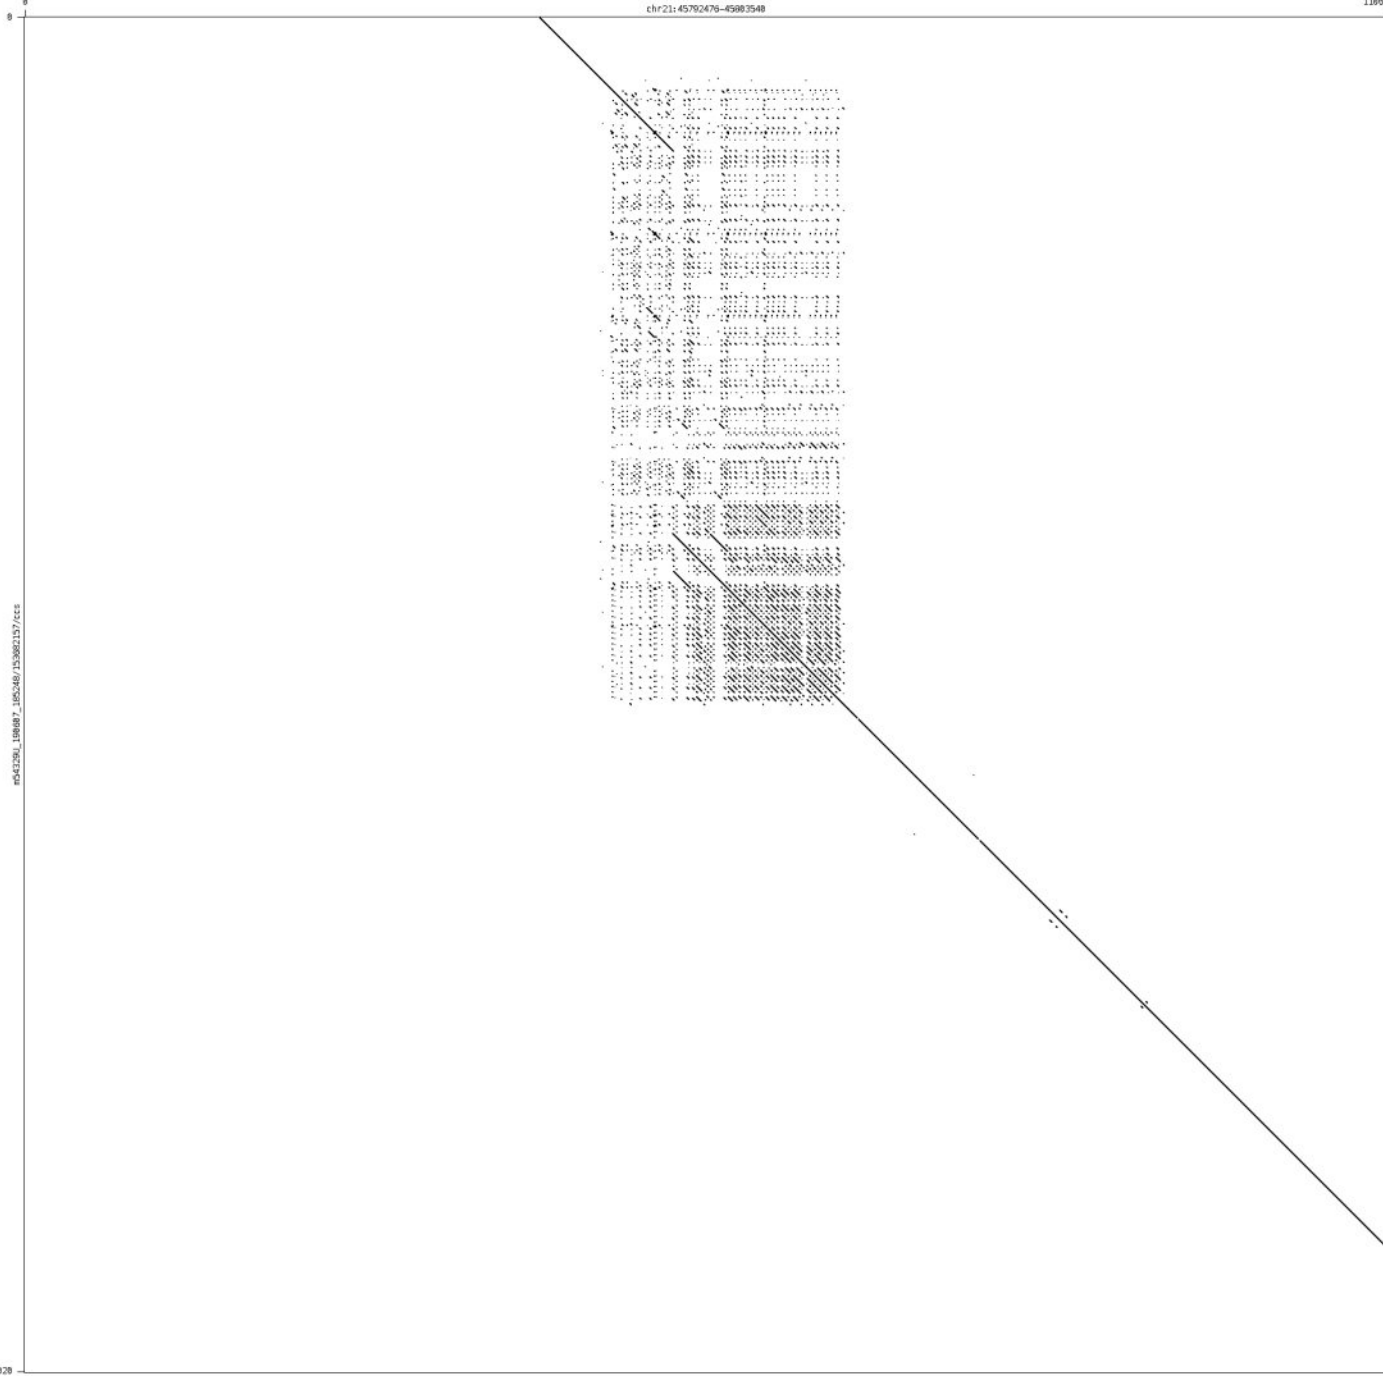

➤ chr21\_46090975\_46091314

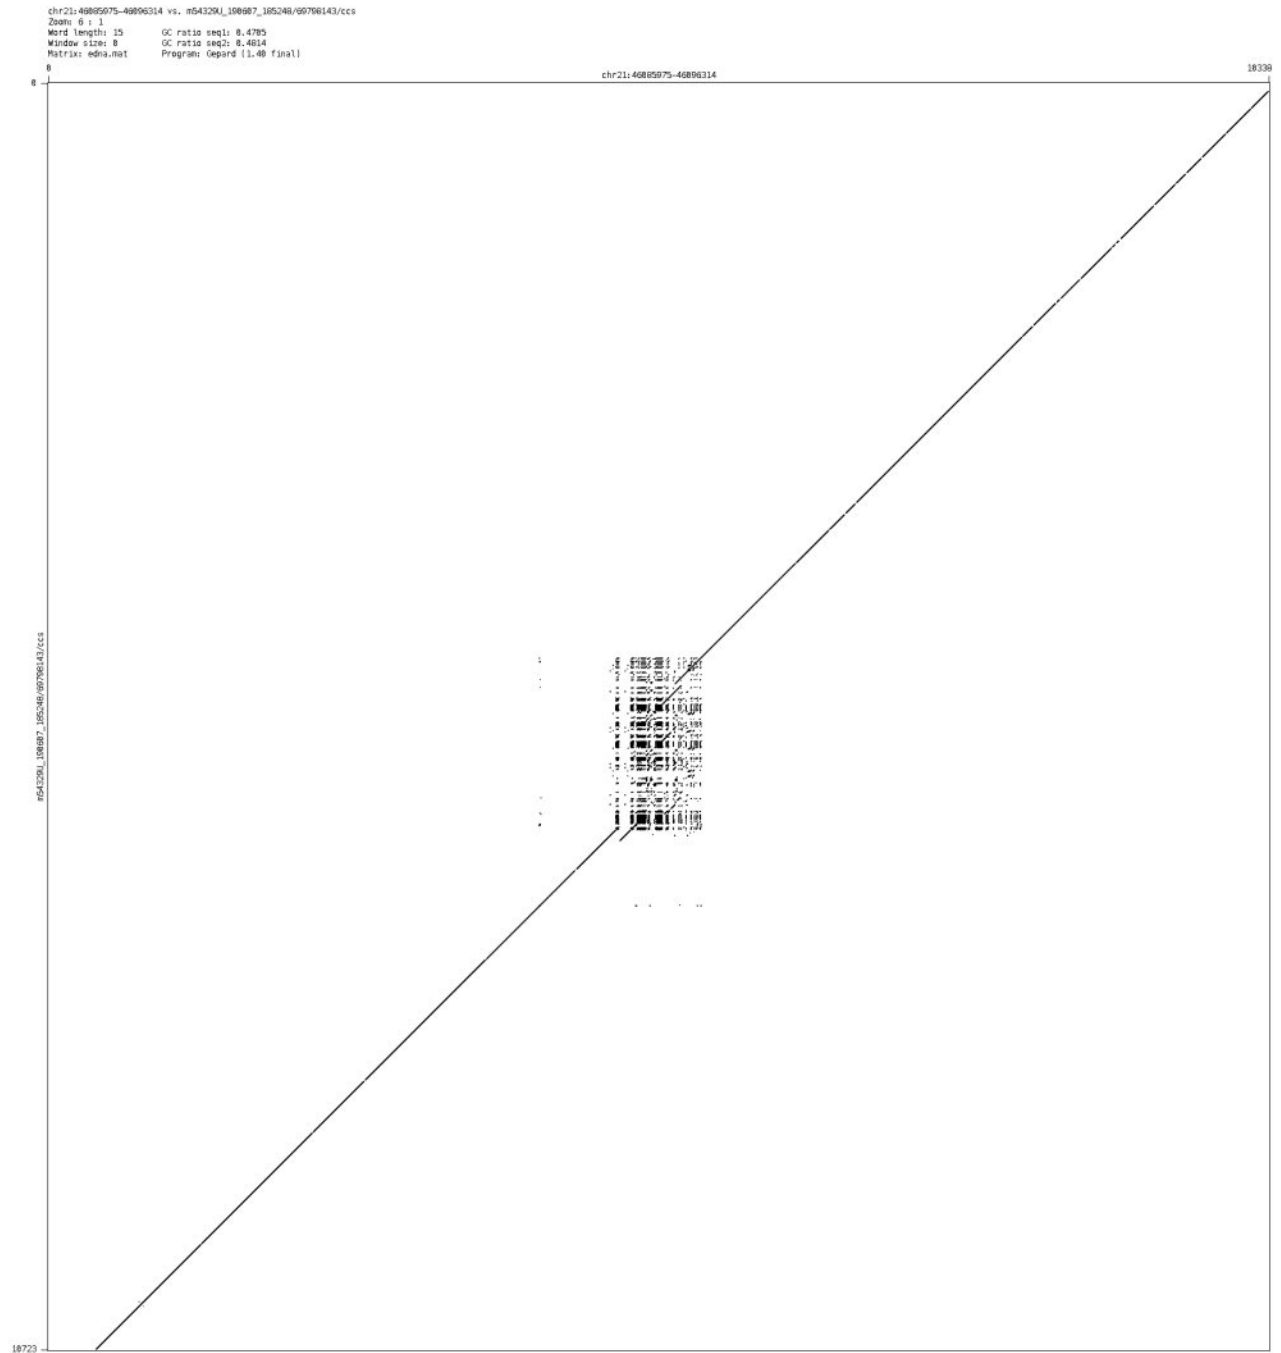

➤ chr21\_46399240\_46399382

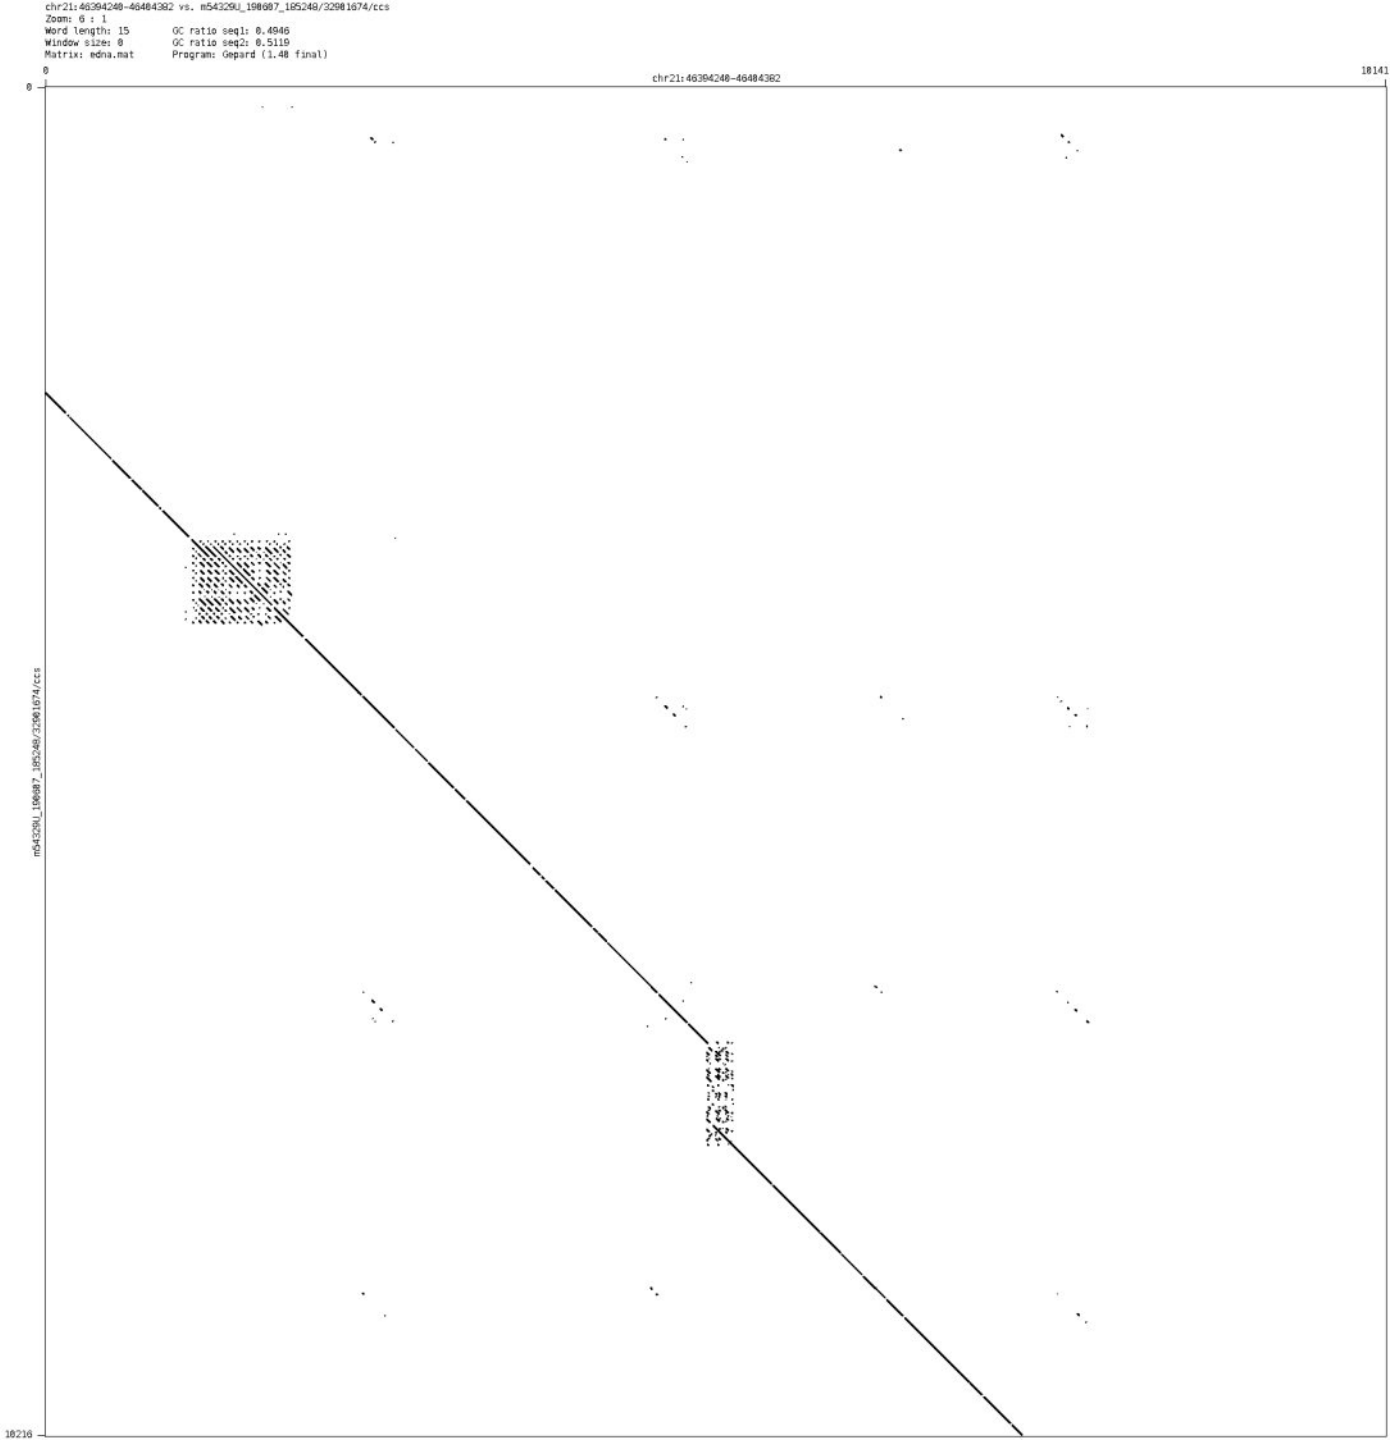

➤ chr21\_46699871\_46699959

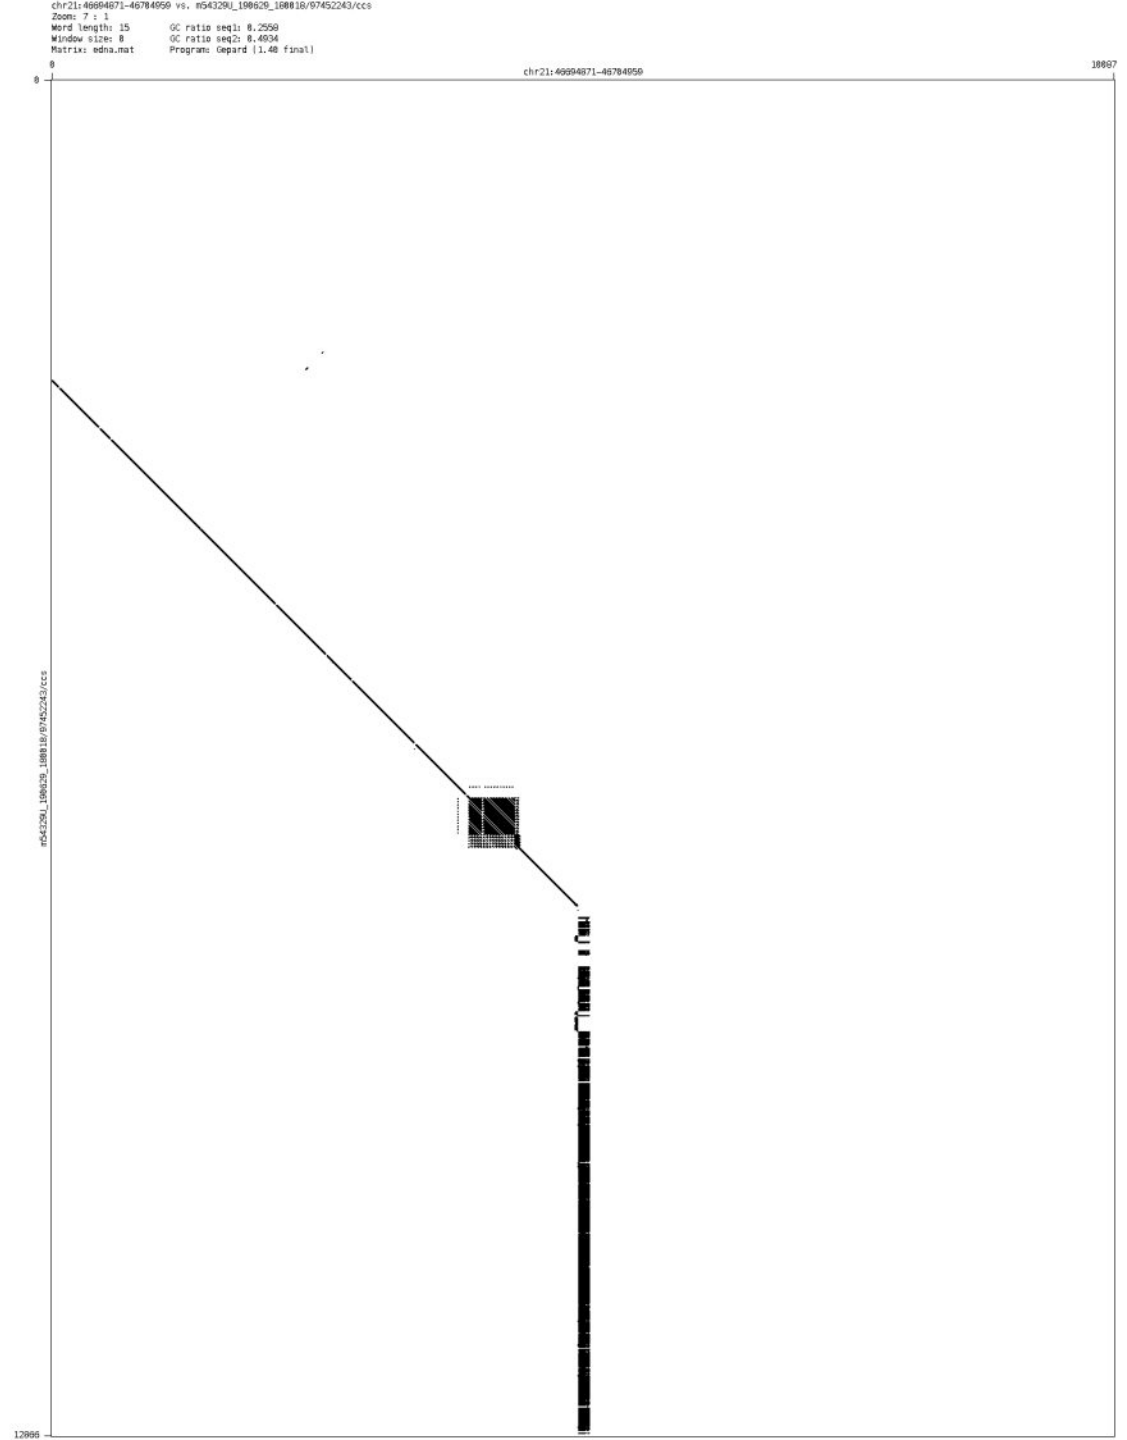

➤ chr22\_16558546\_16558645

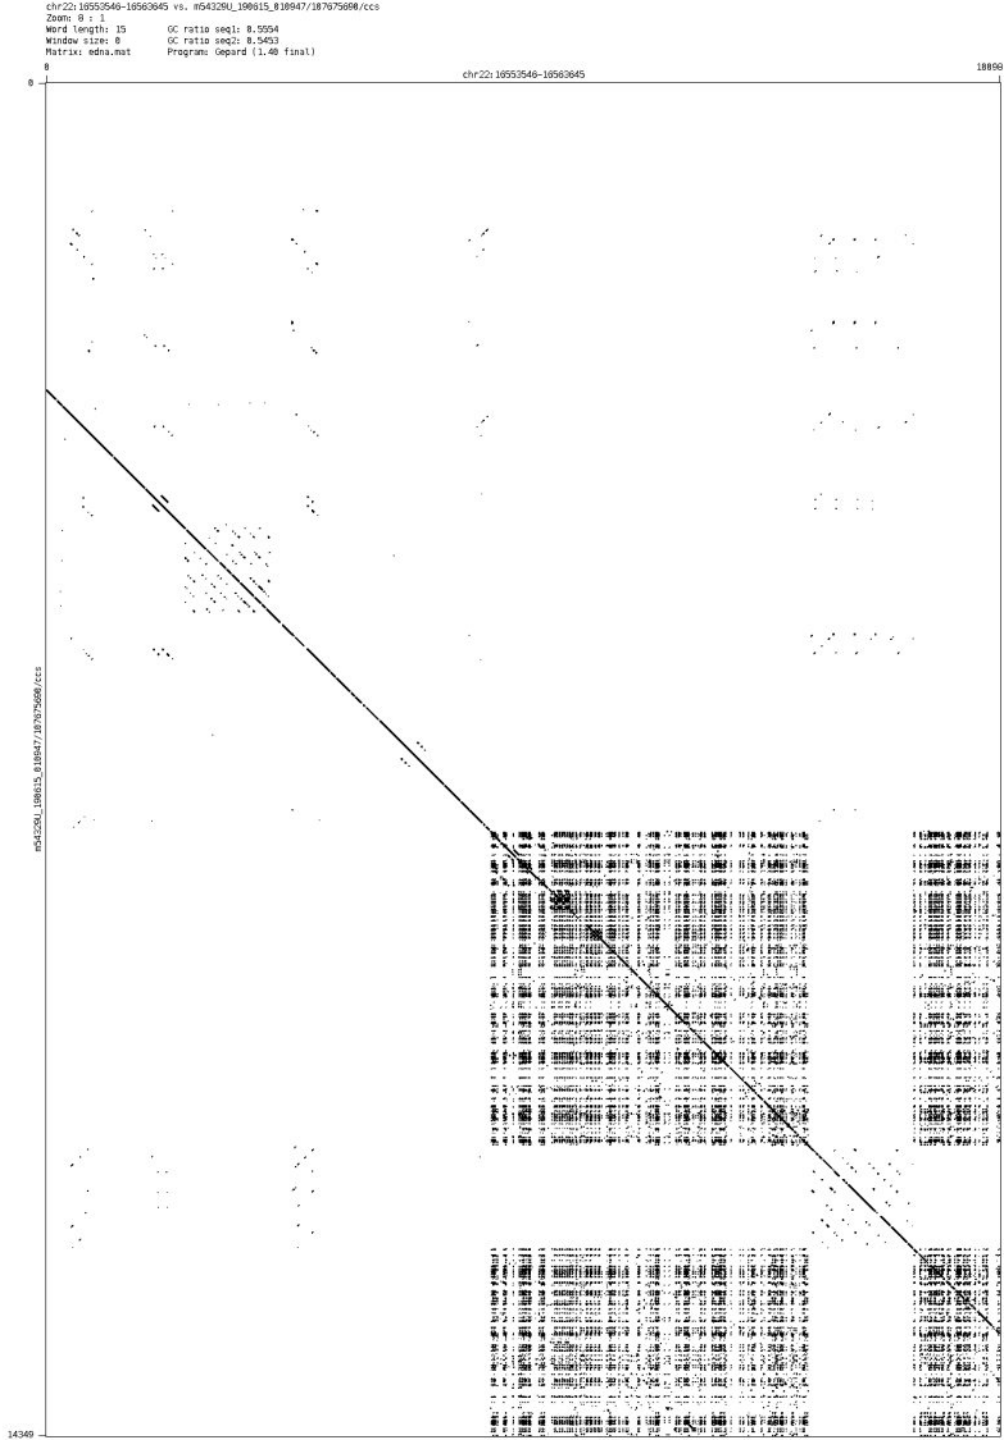

➤ chr22\_17877099\_17877318

chr22:17672899-17882318 vs. m543280\_186687\_185248/166527957/ccs  
Zoom: 0.1  
Word length: 15 OC ratio seq1: 8.5218  
Window size: 0 OC ratio seq2: 8.5199  
Matrix: edna.mat Program: cepad (1.48 final)

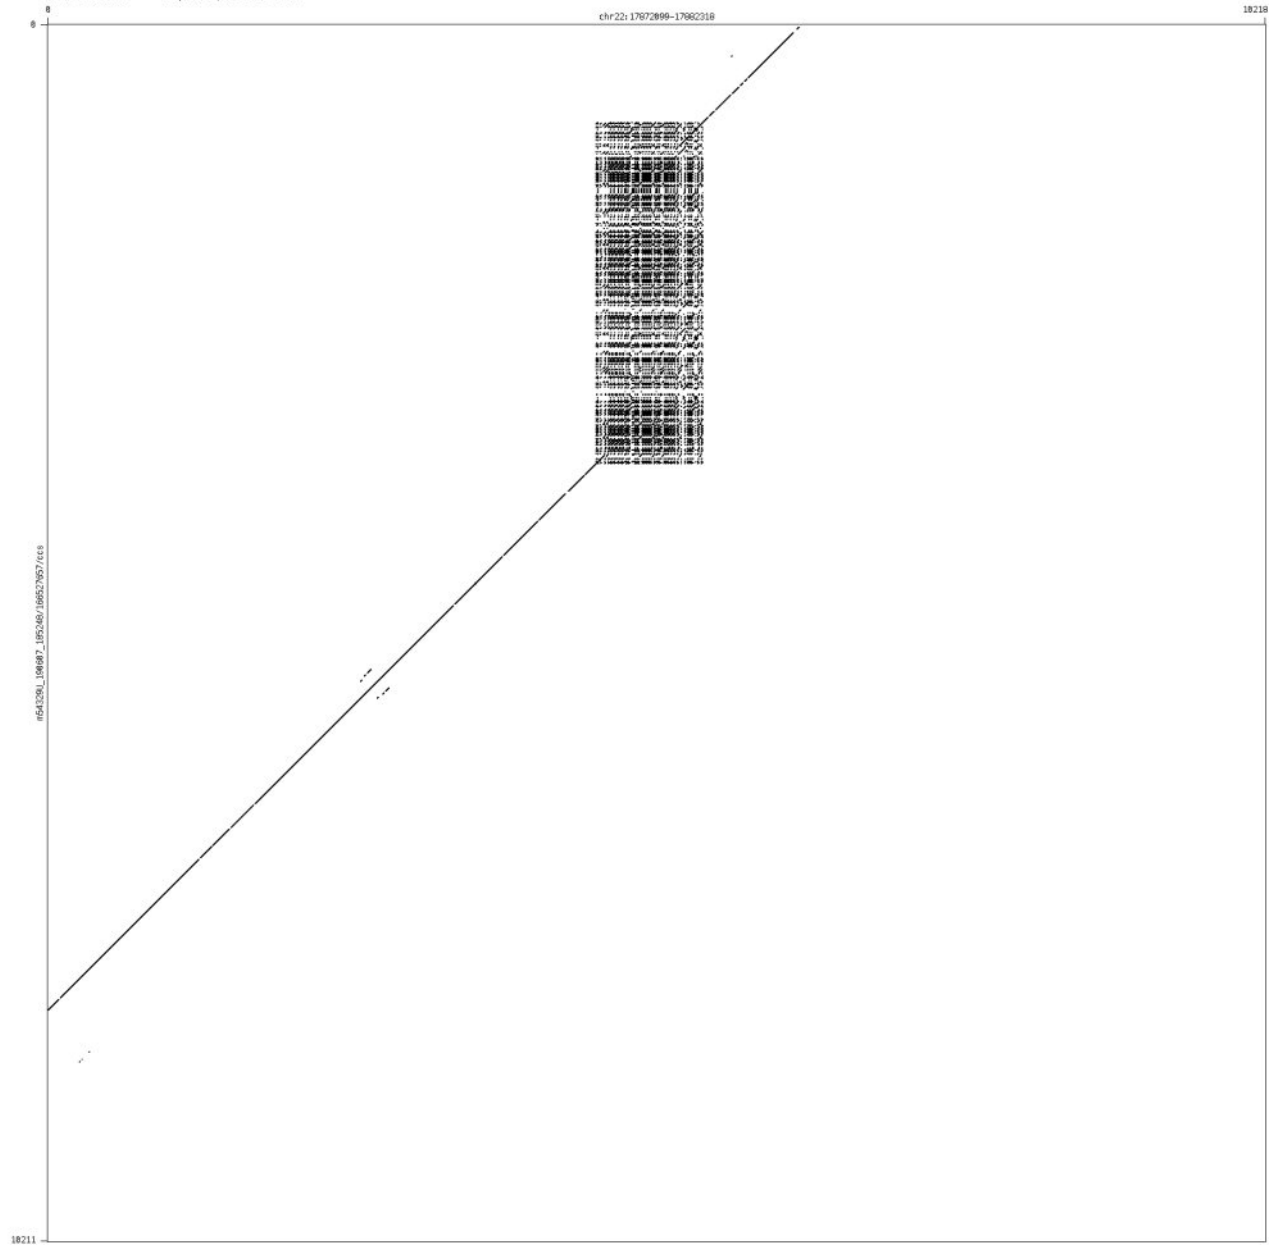

➤ chr22\_18106125\_18106340

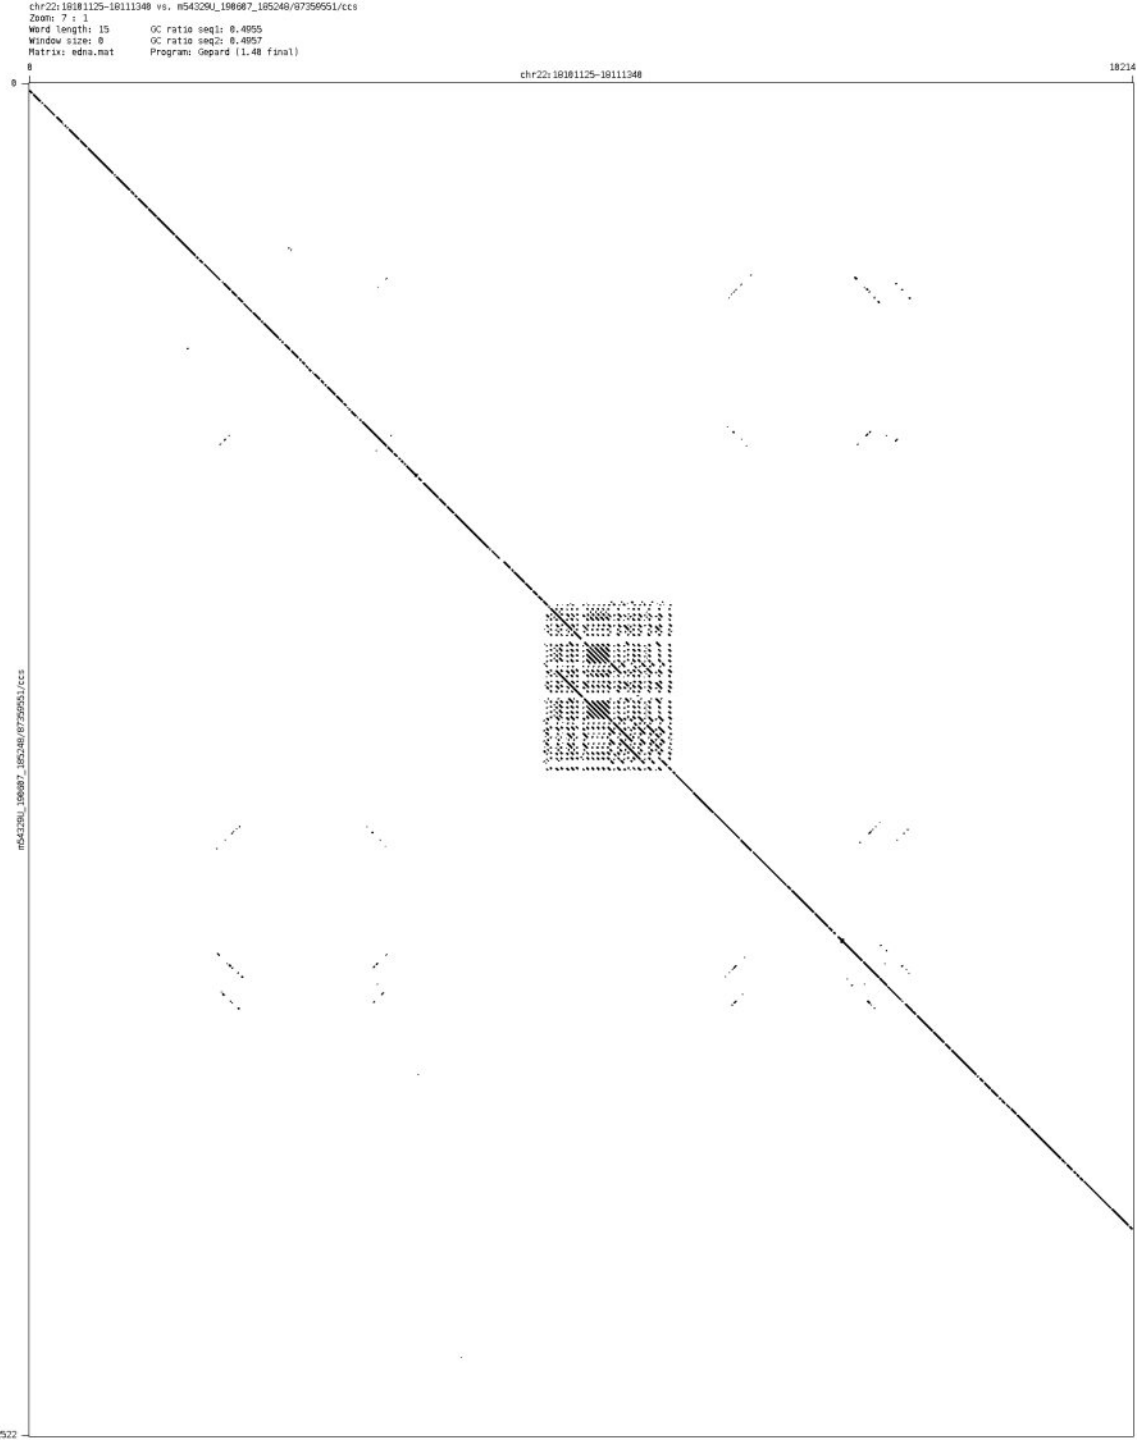



➤ chr22\_19202401\_19202471

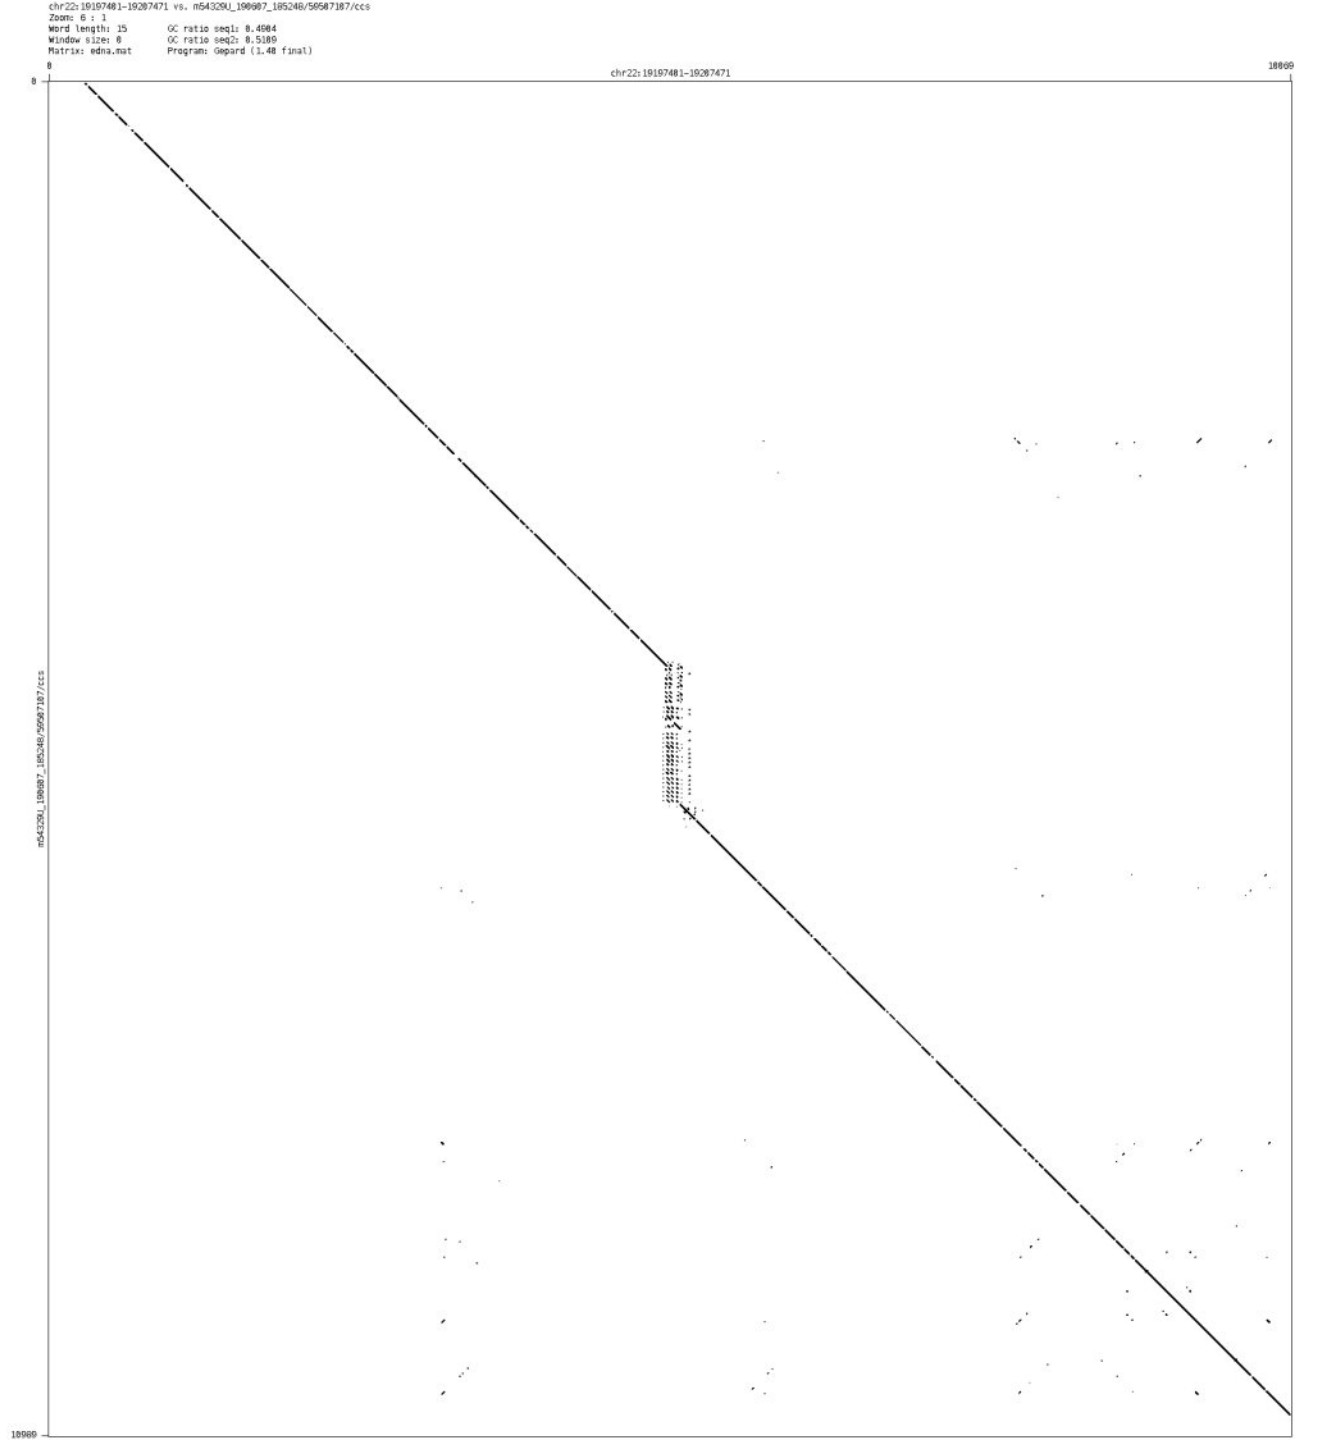

➤ chr22\_20075270\_20075522

chr22:20070270-20080522 vs. m54329L\_190617\_231895/7471926/ccs  
Zoom: 8 : 1 GC ratio seq1: 0.4987  
Word length: 15 GC ratio seq2: 0.5000  
Window size: 0 Matrix: edna.mat Program: Gepard (1.40 final)

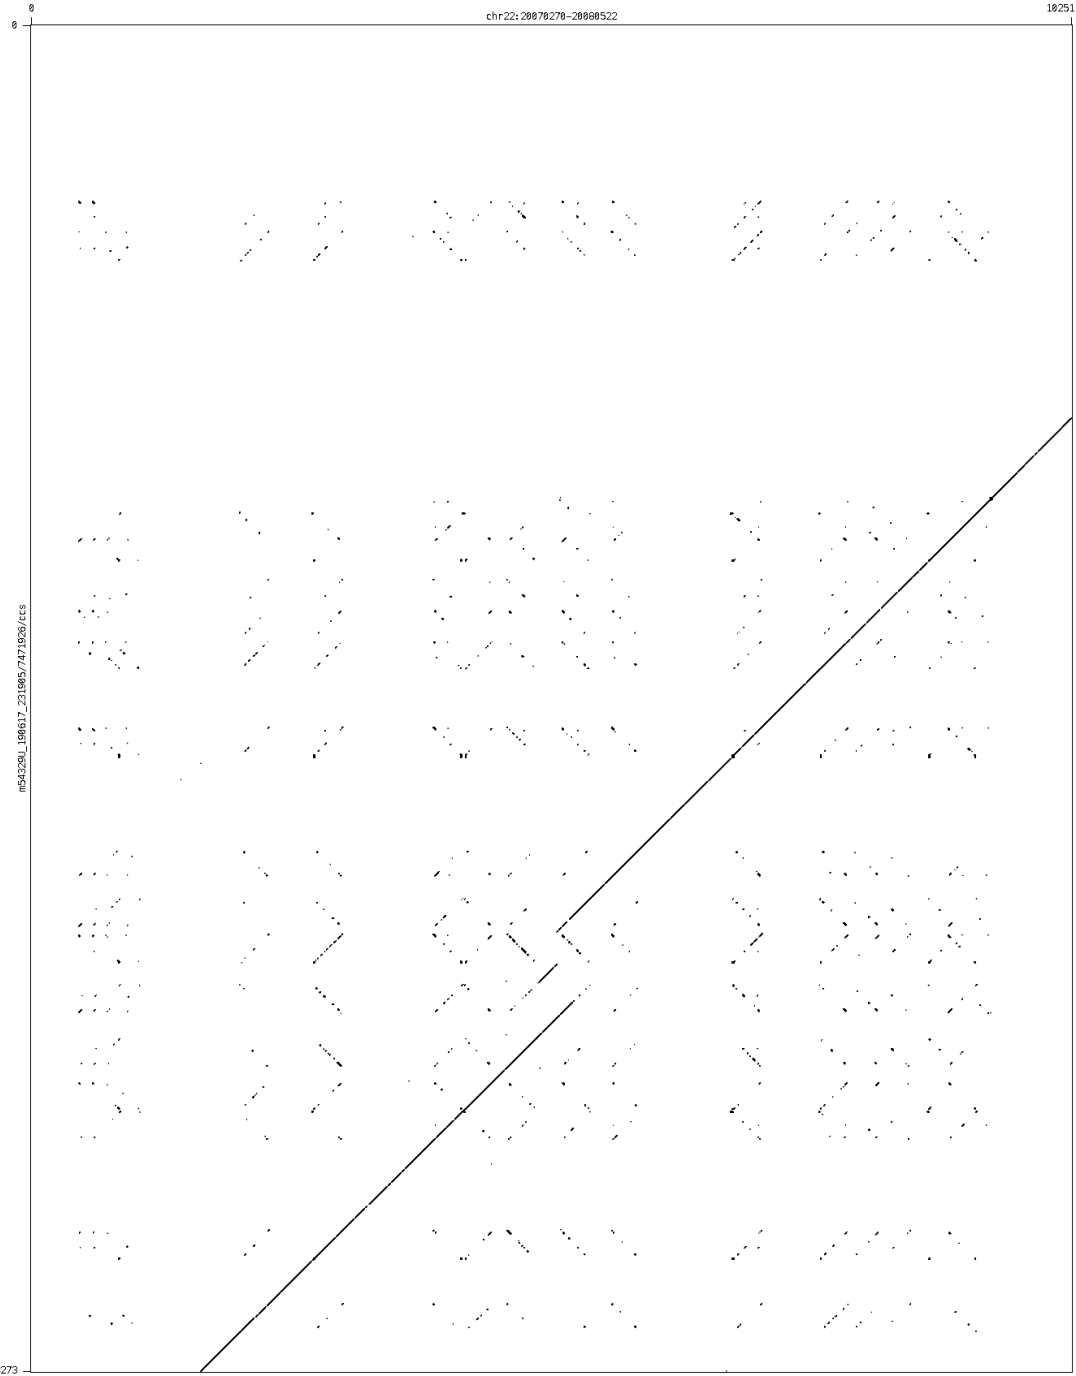

➤ chr22\_29120197\_29120382

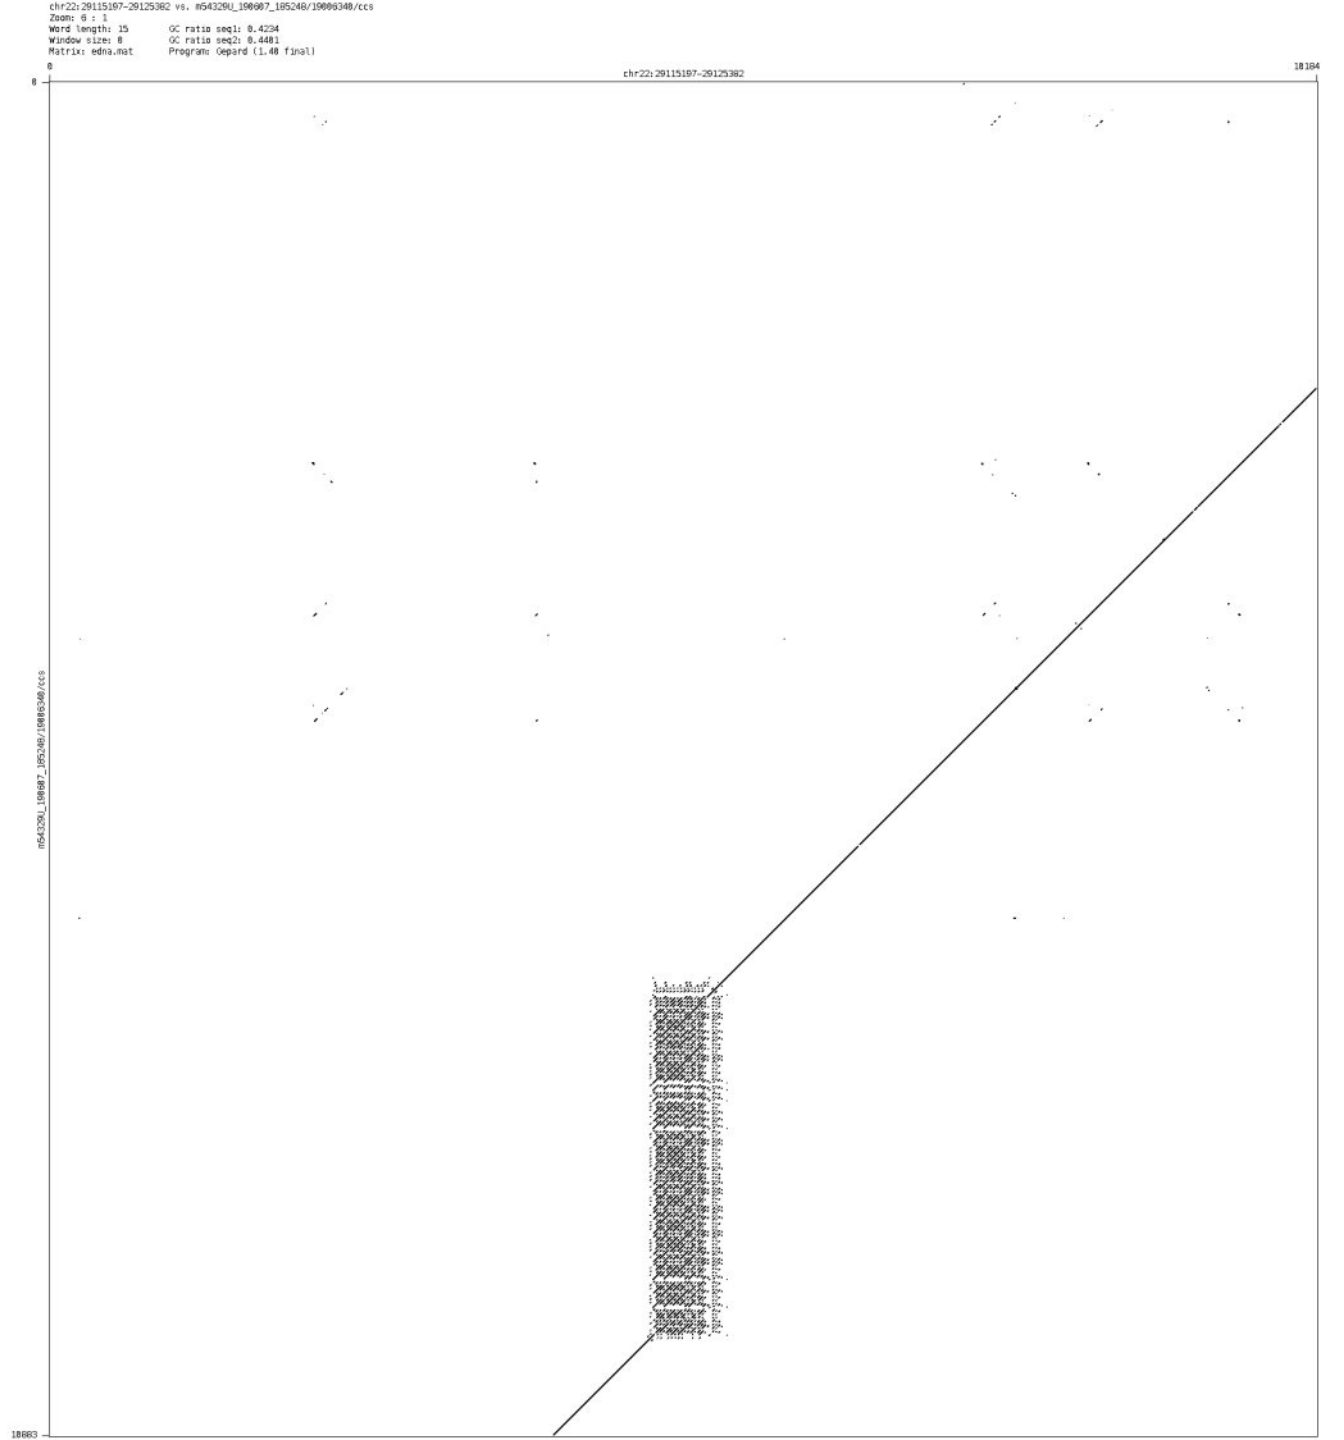

➤ chr22\_42324053\_42324236

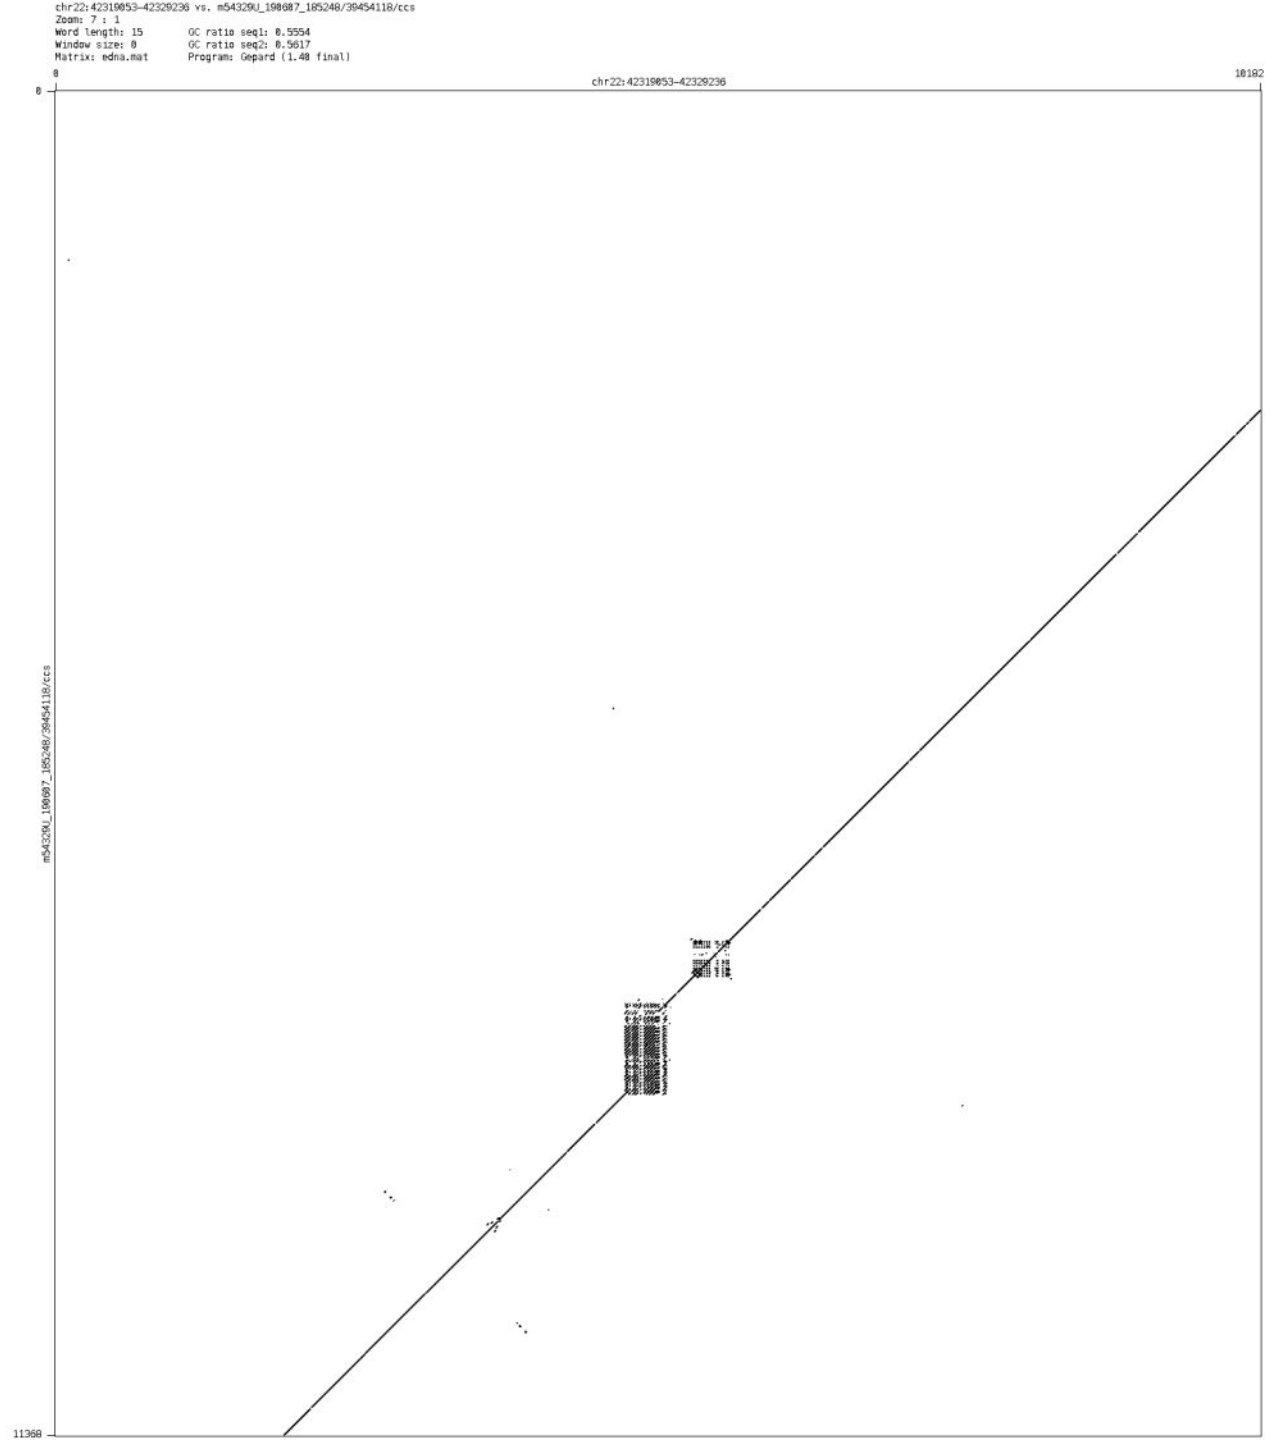

➤ chr22\_43432701\_43432877

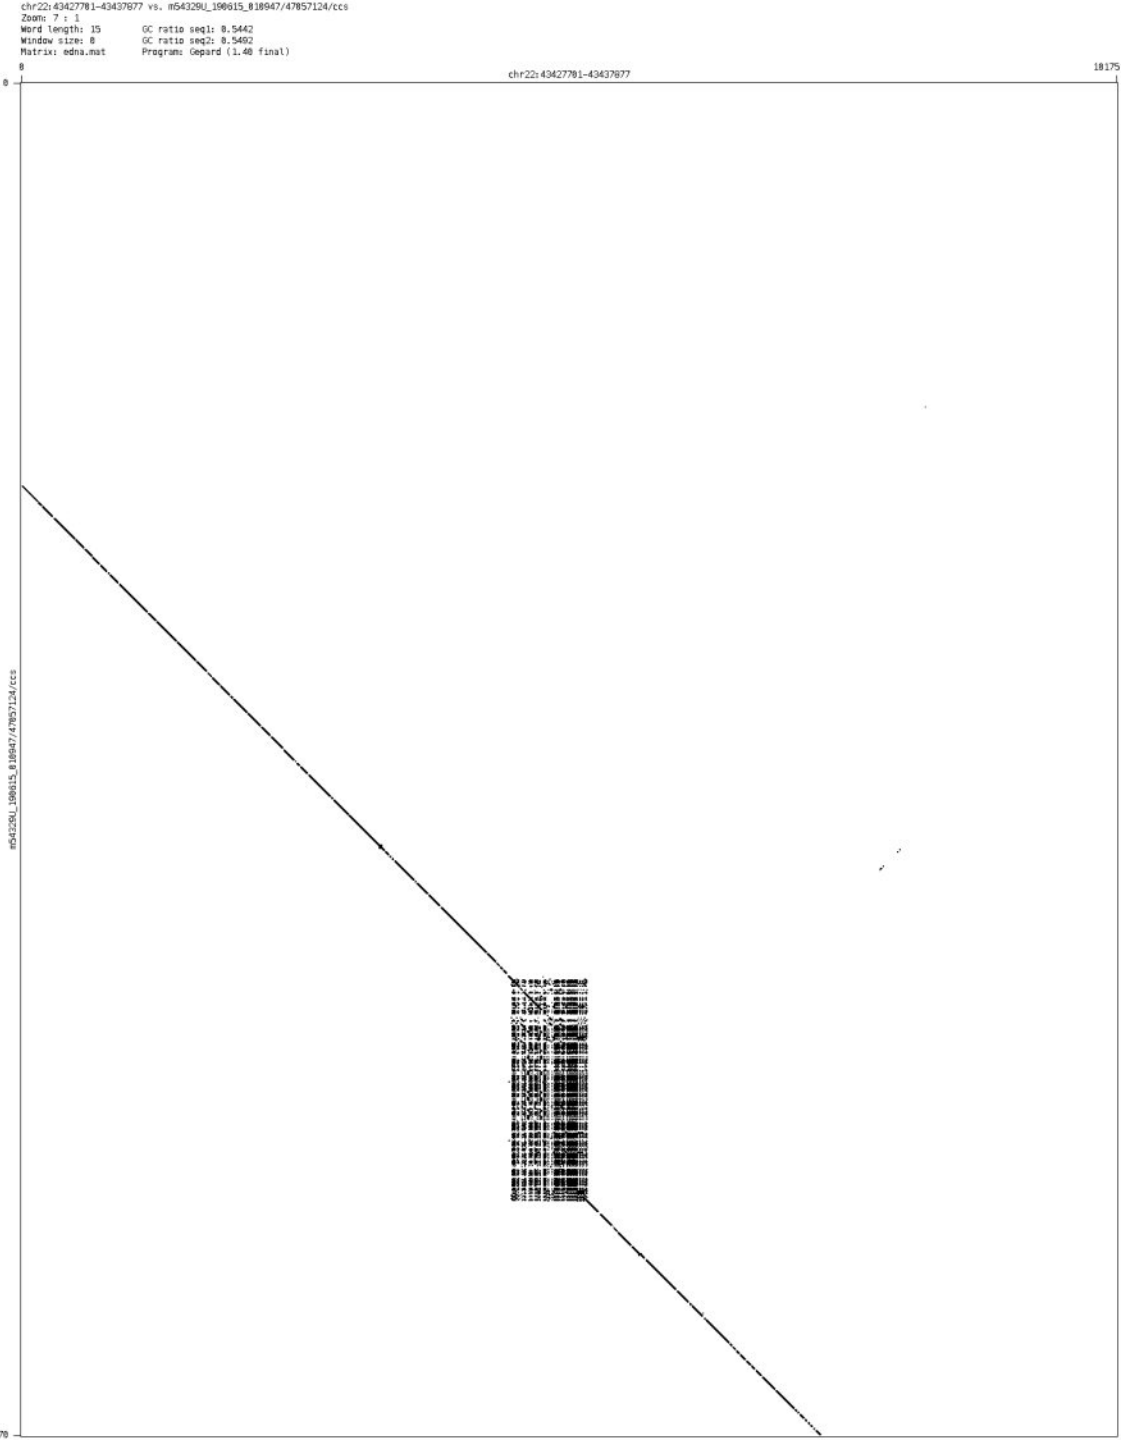

➤ chr22\_45349173\_45350498

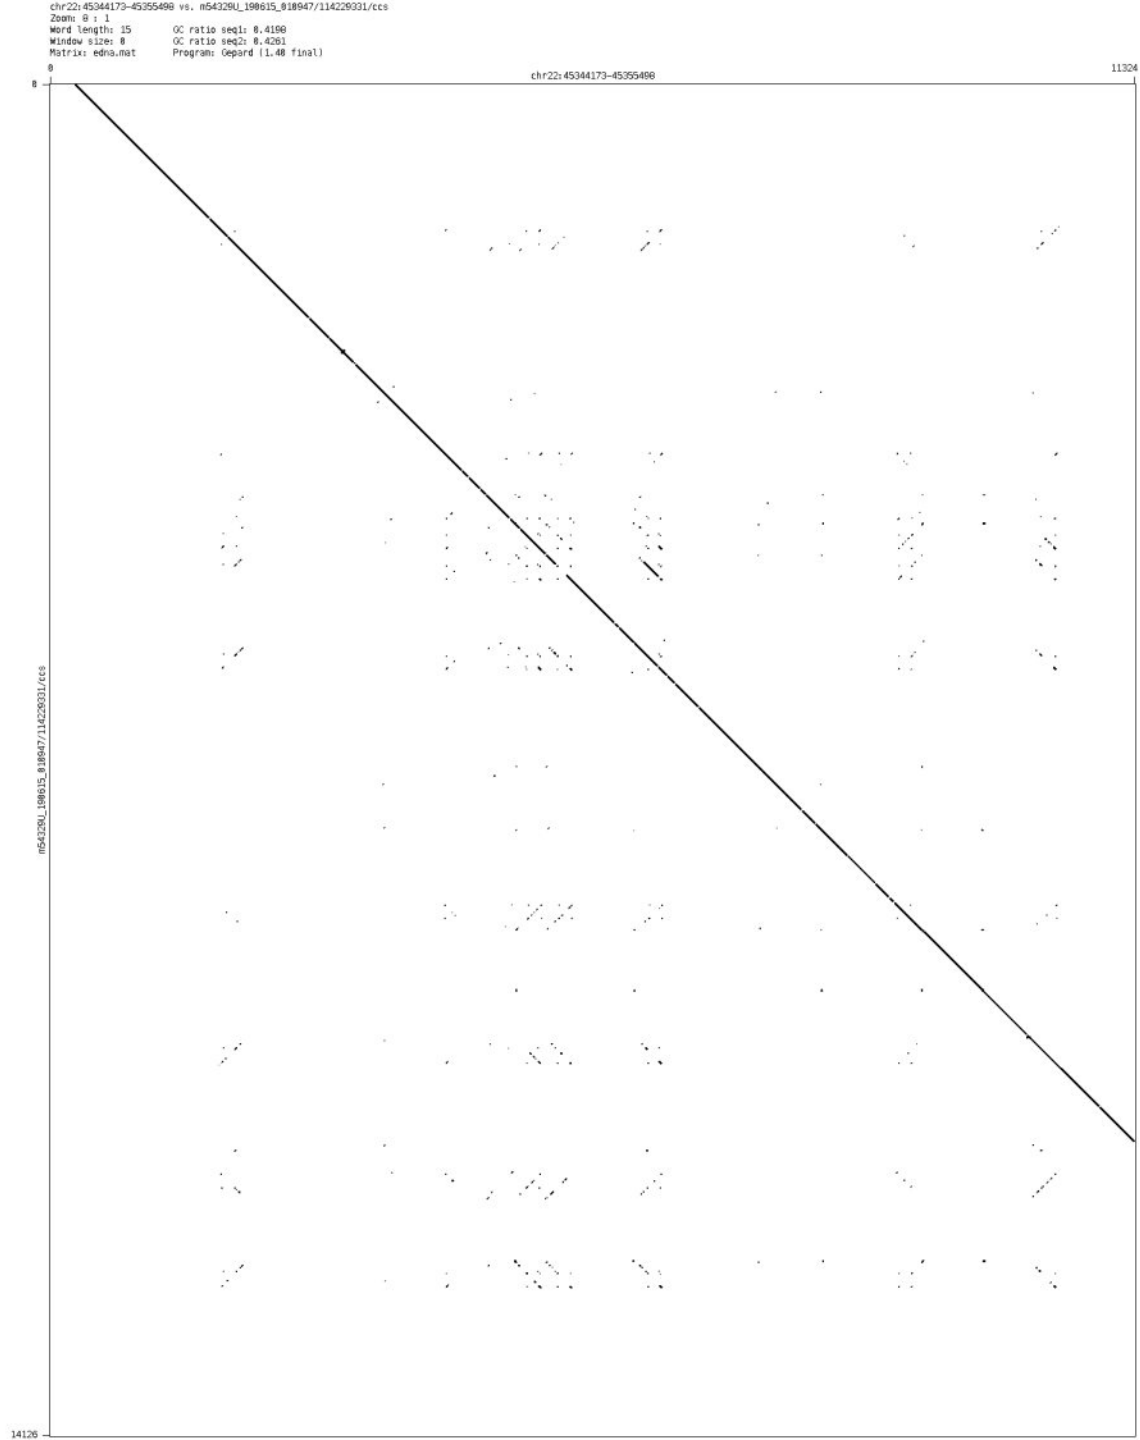

➤ chr22\_47379190\_47379385

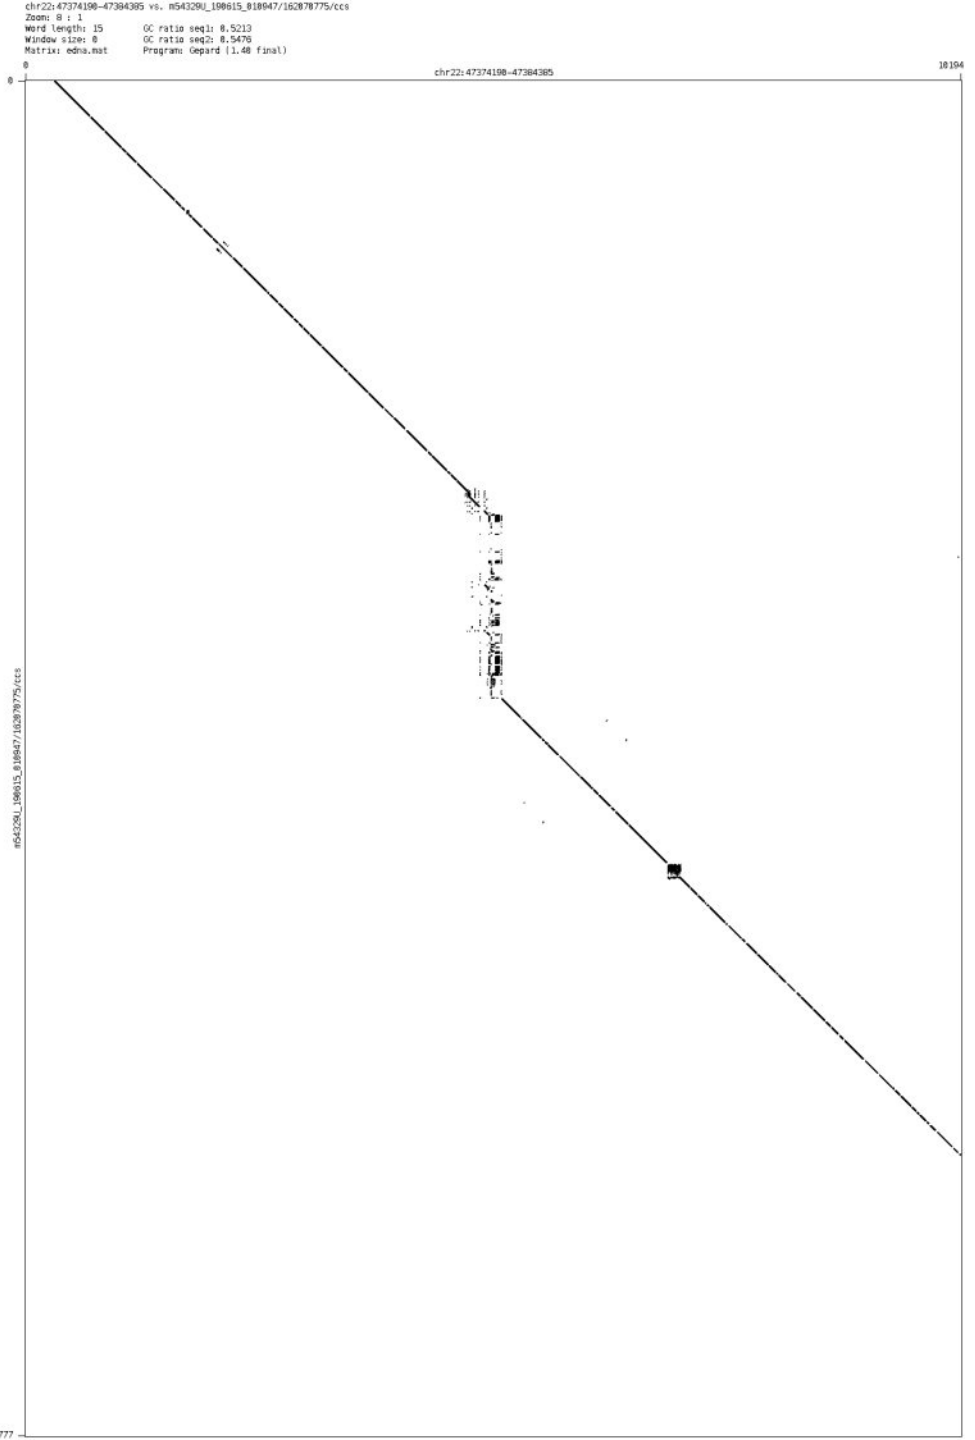

➤ chr22\_48620822\_48620943

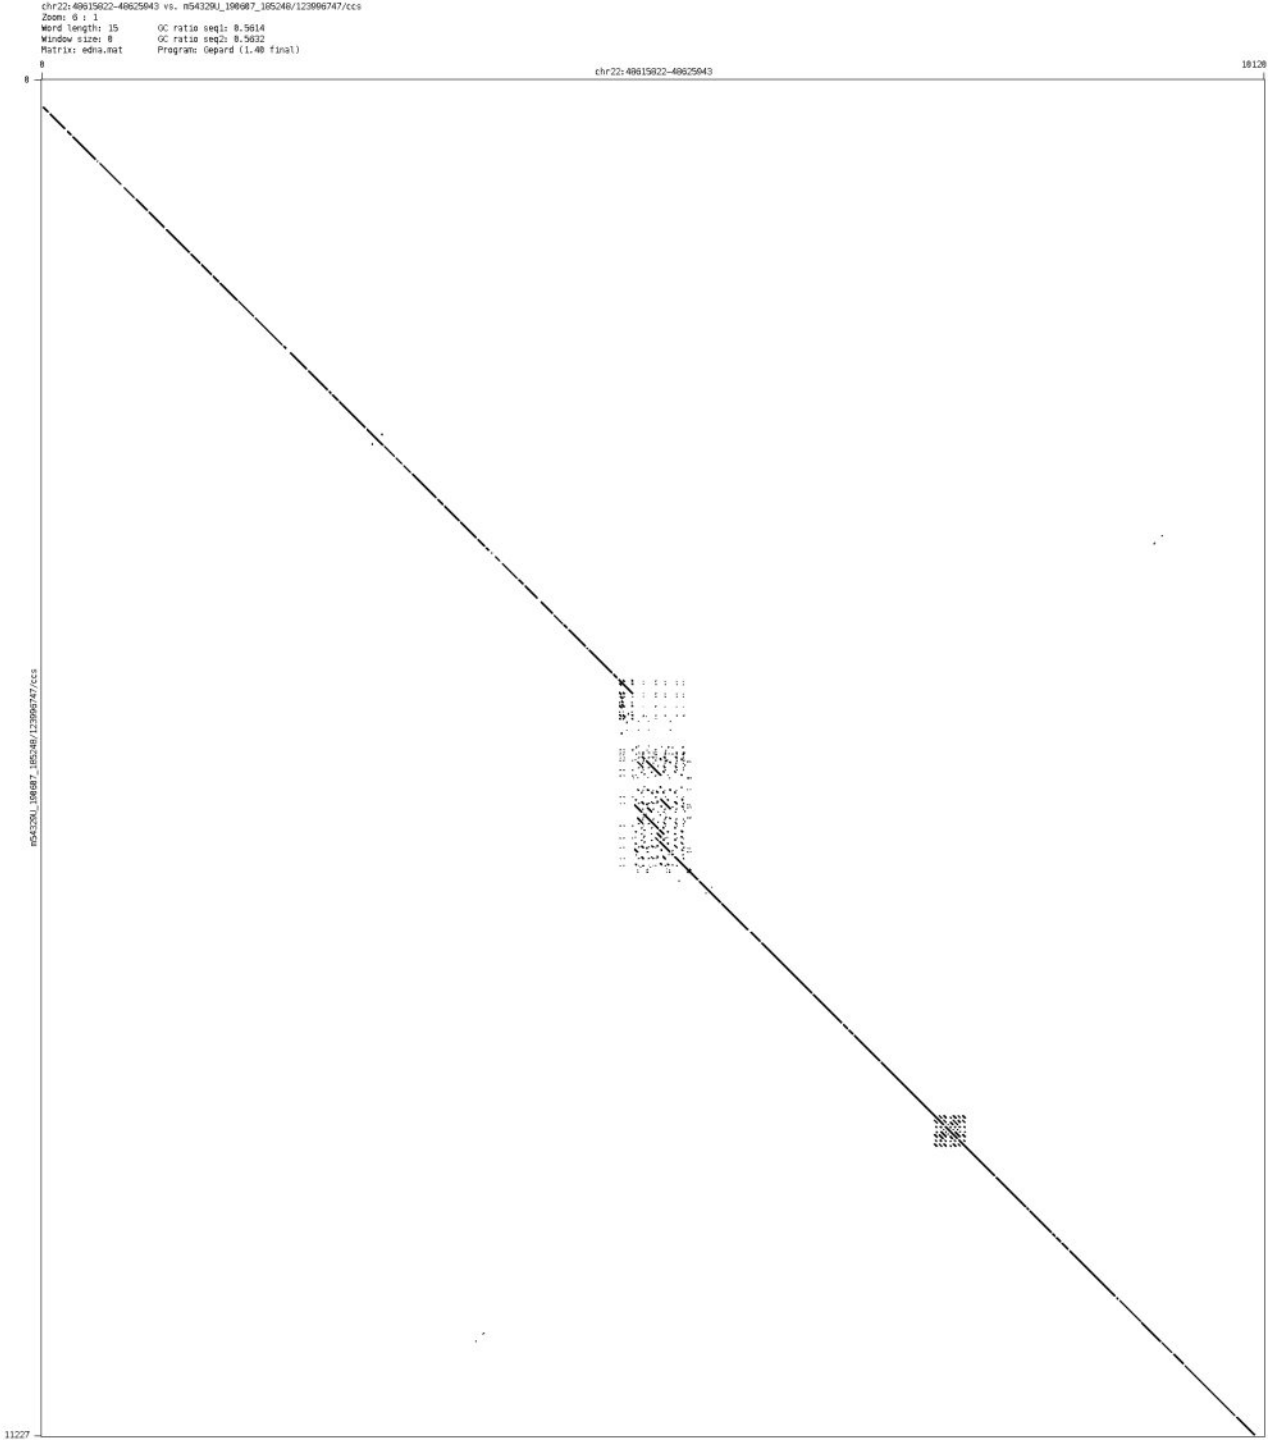



➤ chr22\_48757225\_48757402

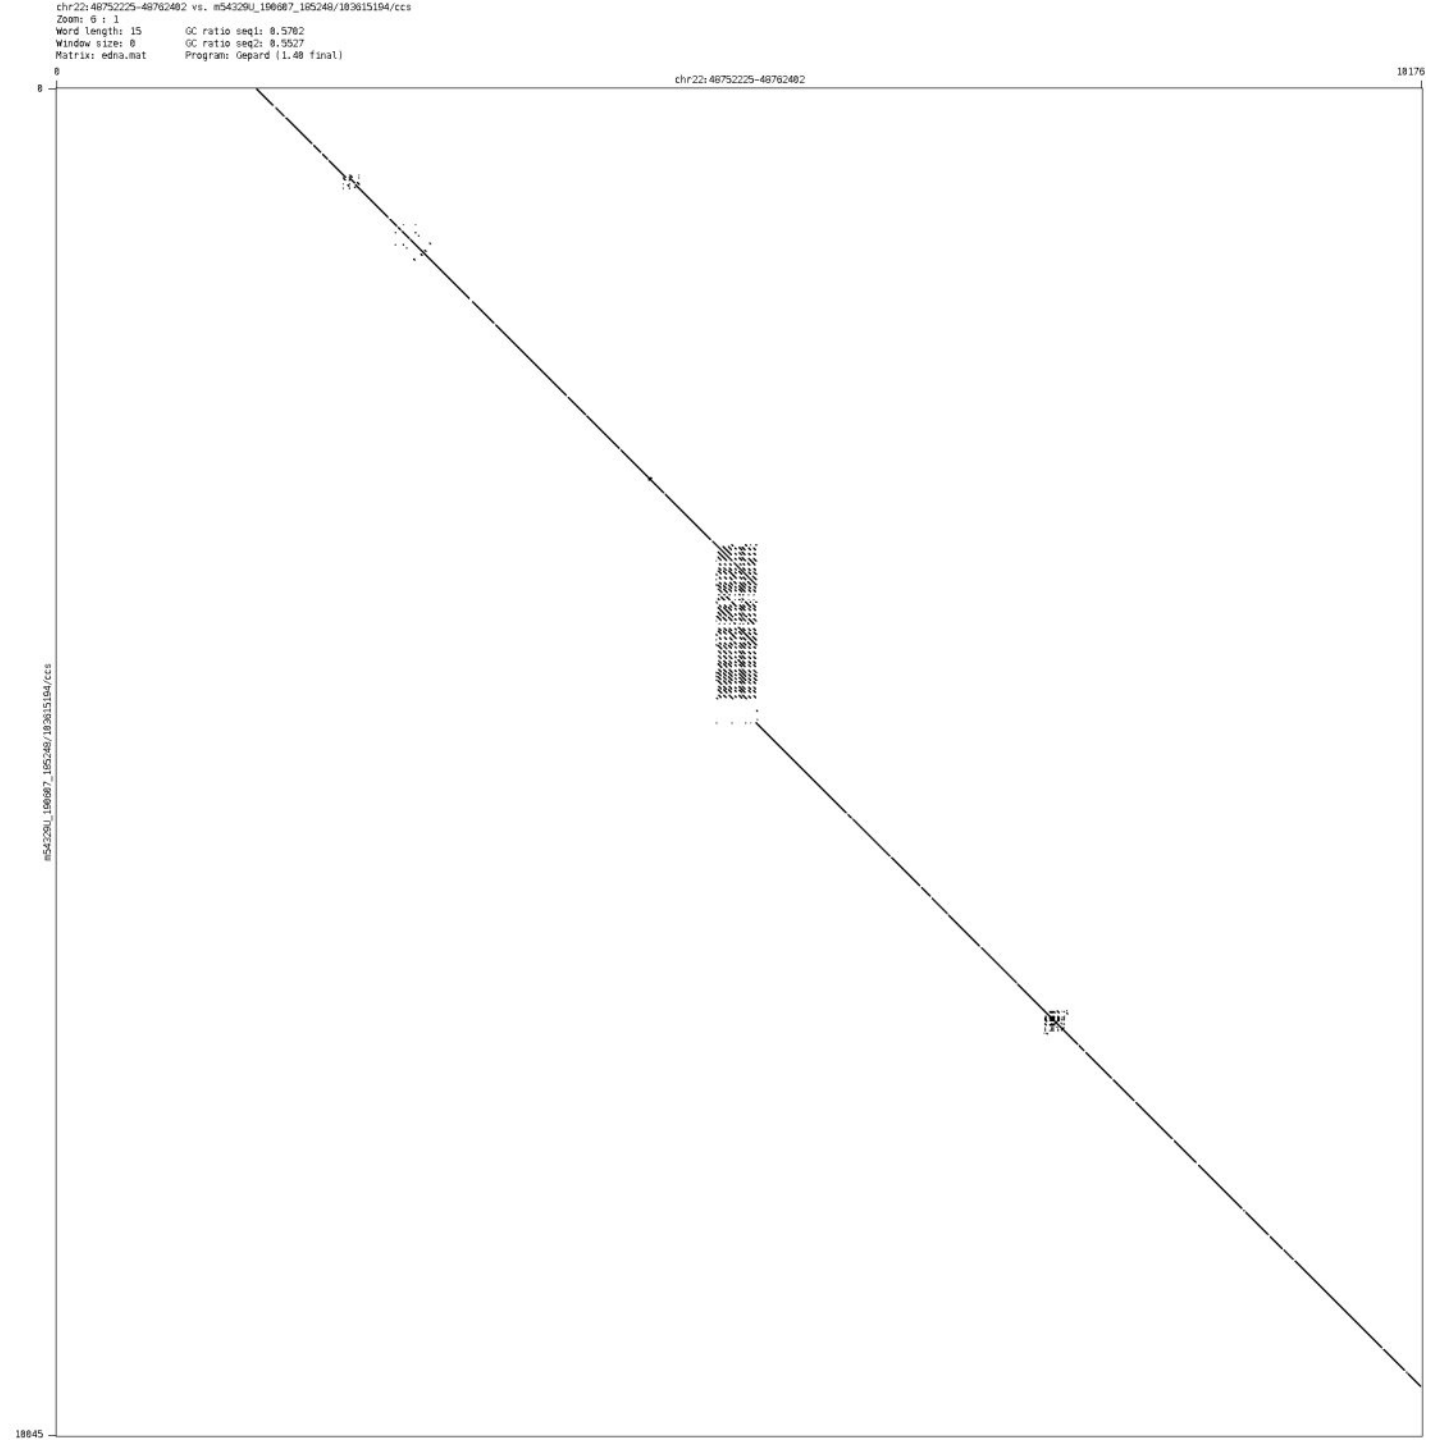

➤ chr22\_49155990\_49156116

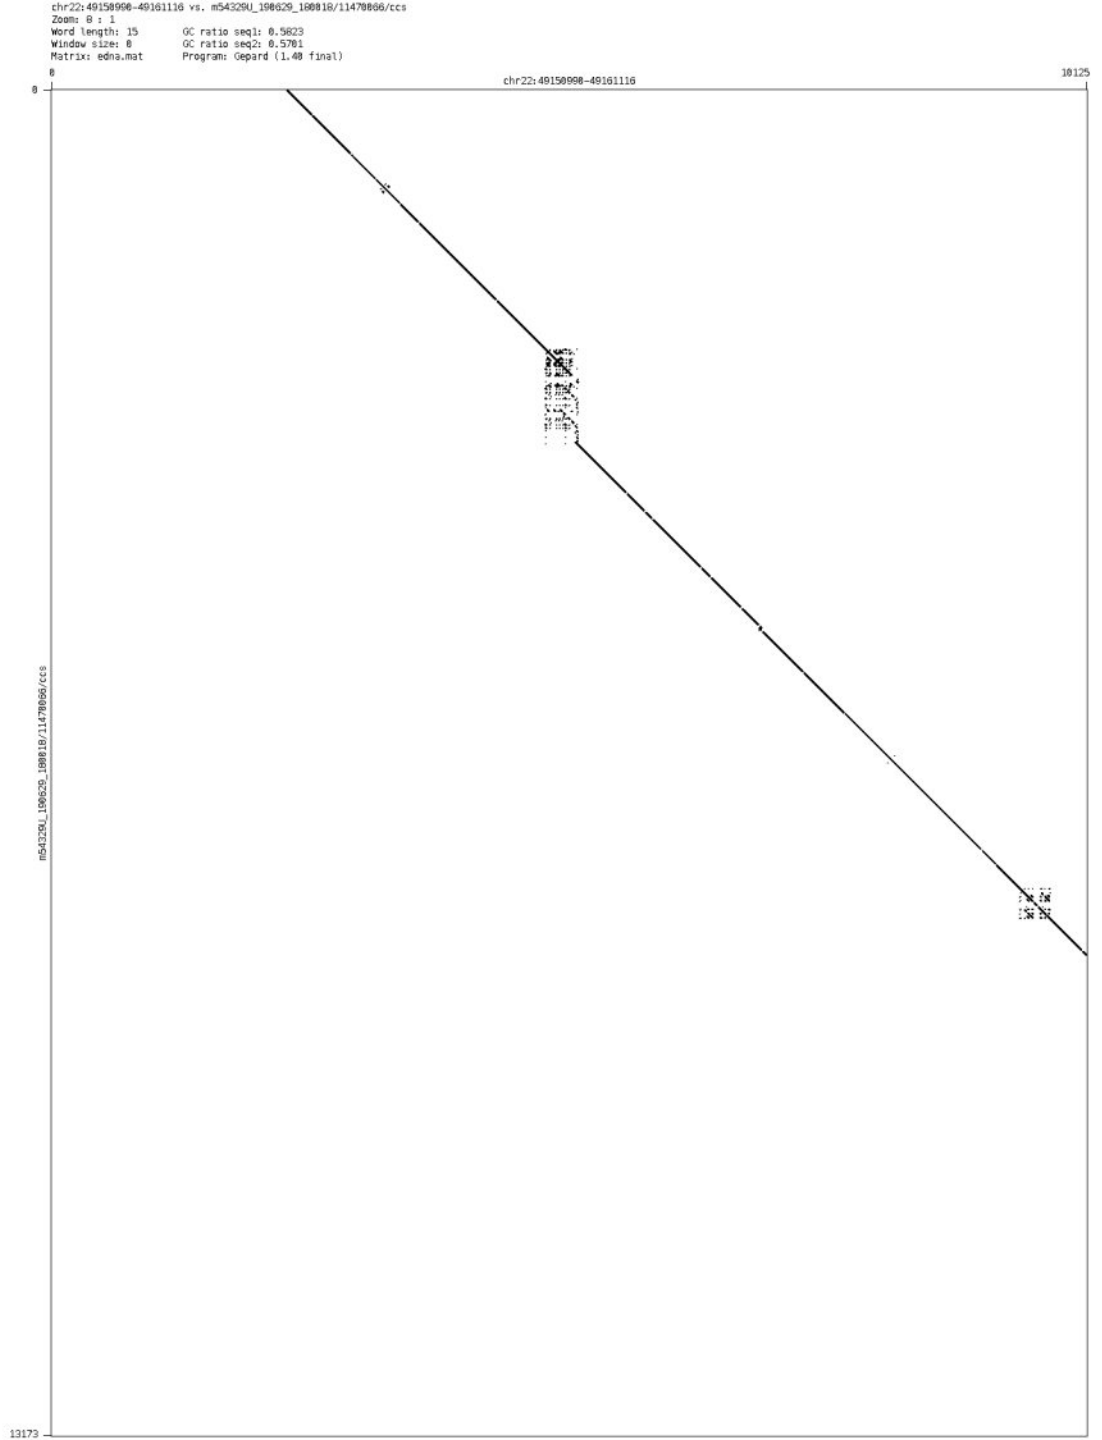

➤ chr22\_50276306\_50276417

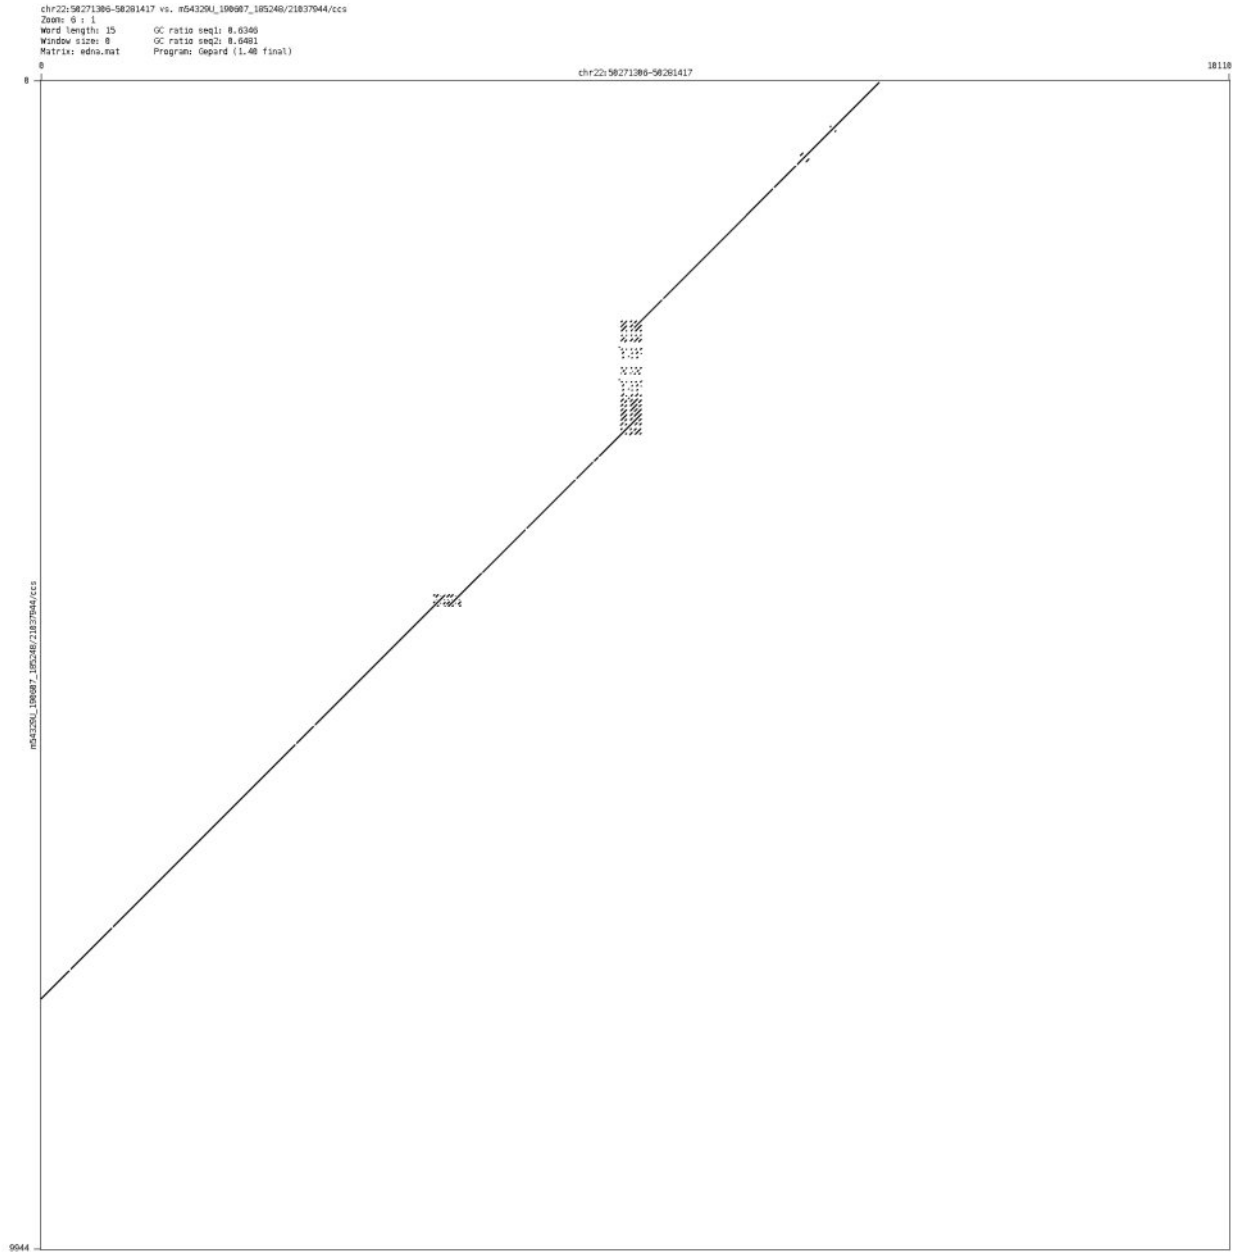

➤ chr22\_50643752\_50643941

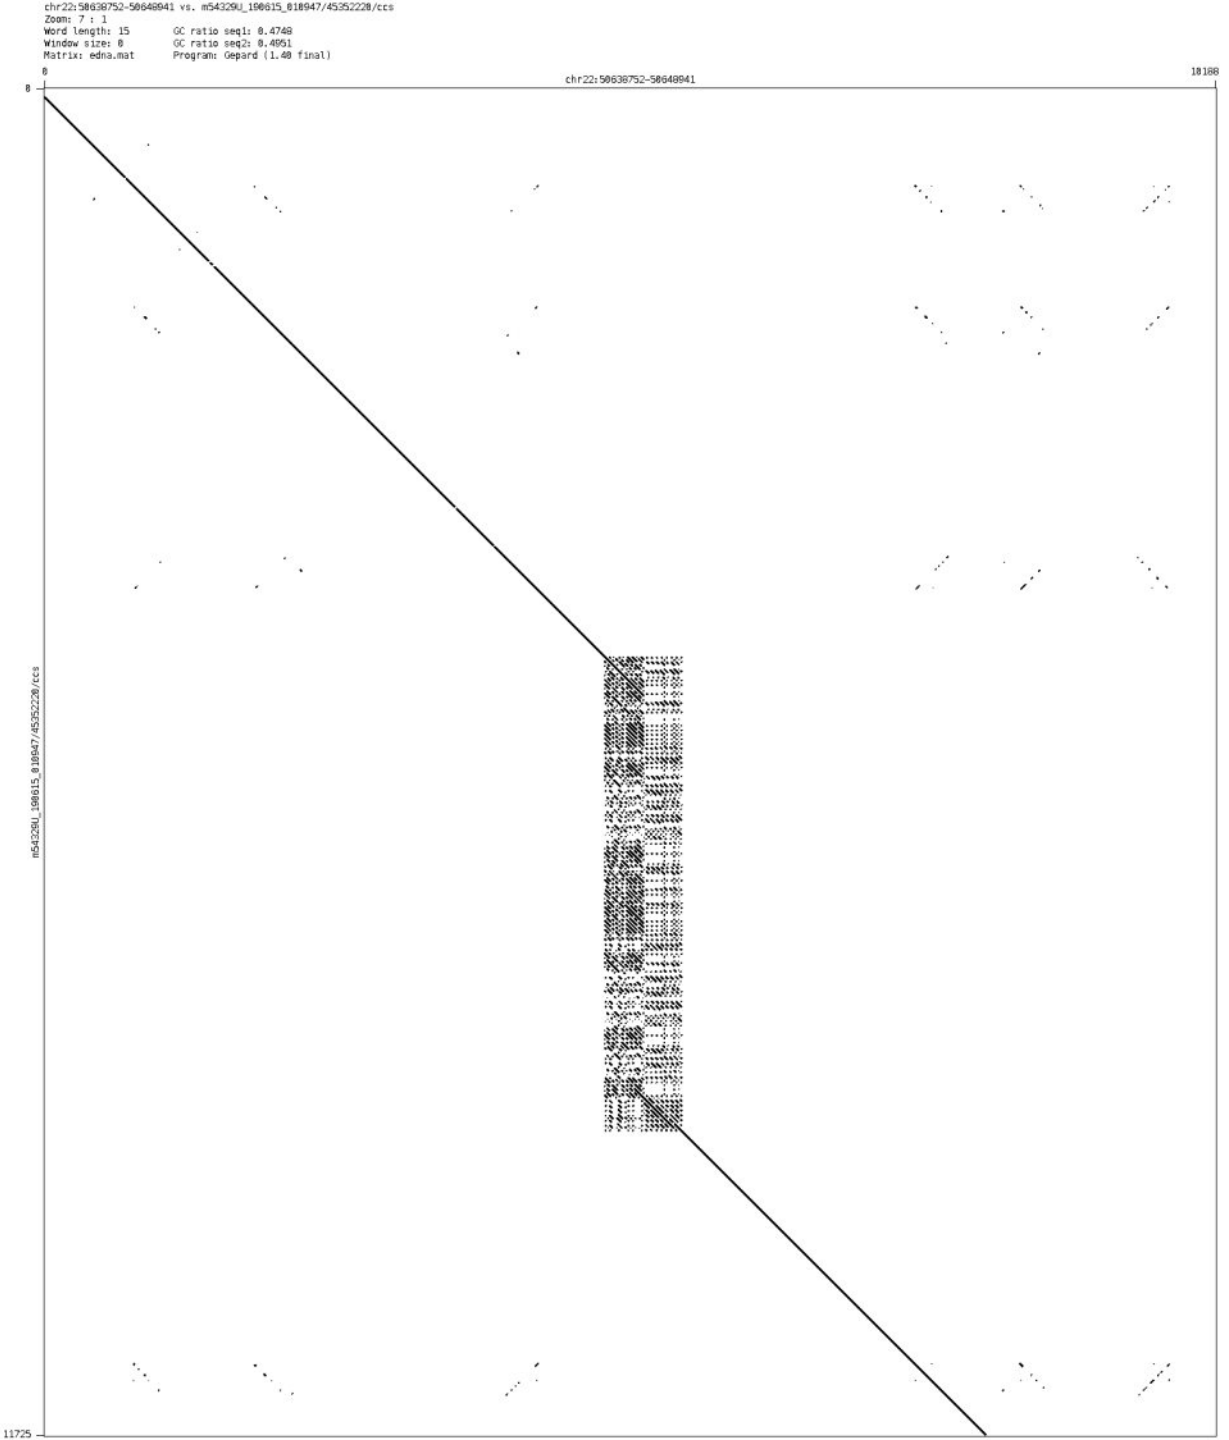

➤ chr22\_50807923\_50808081

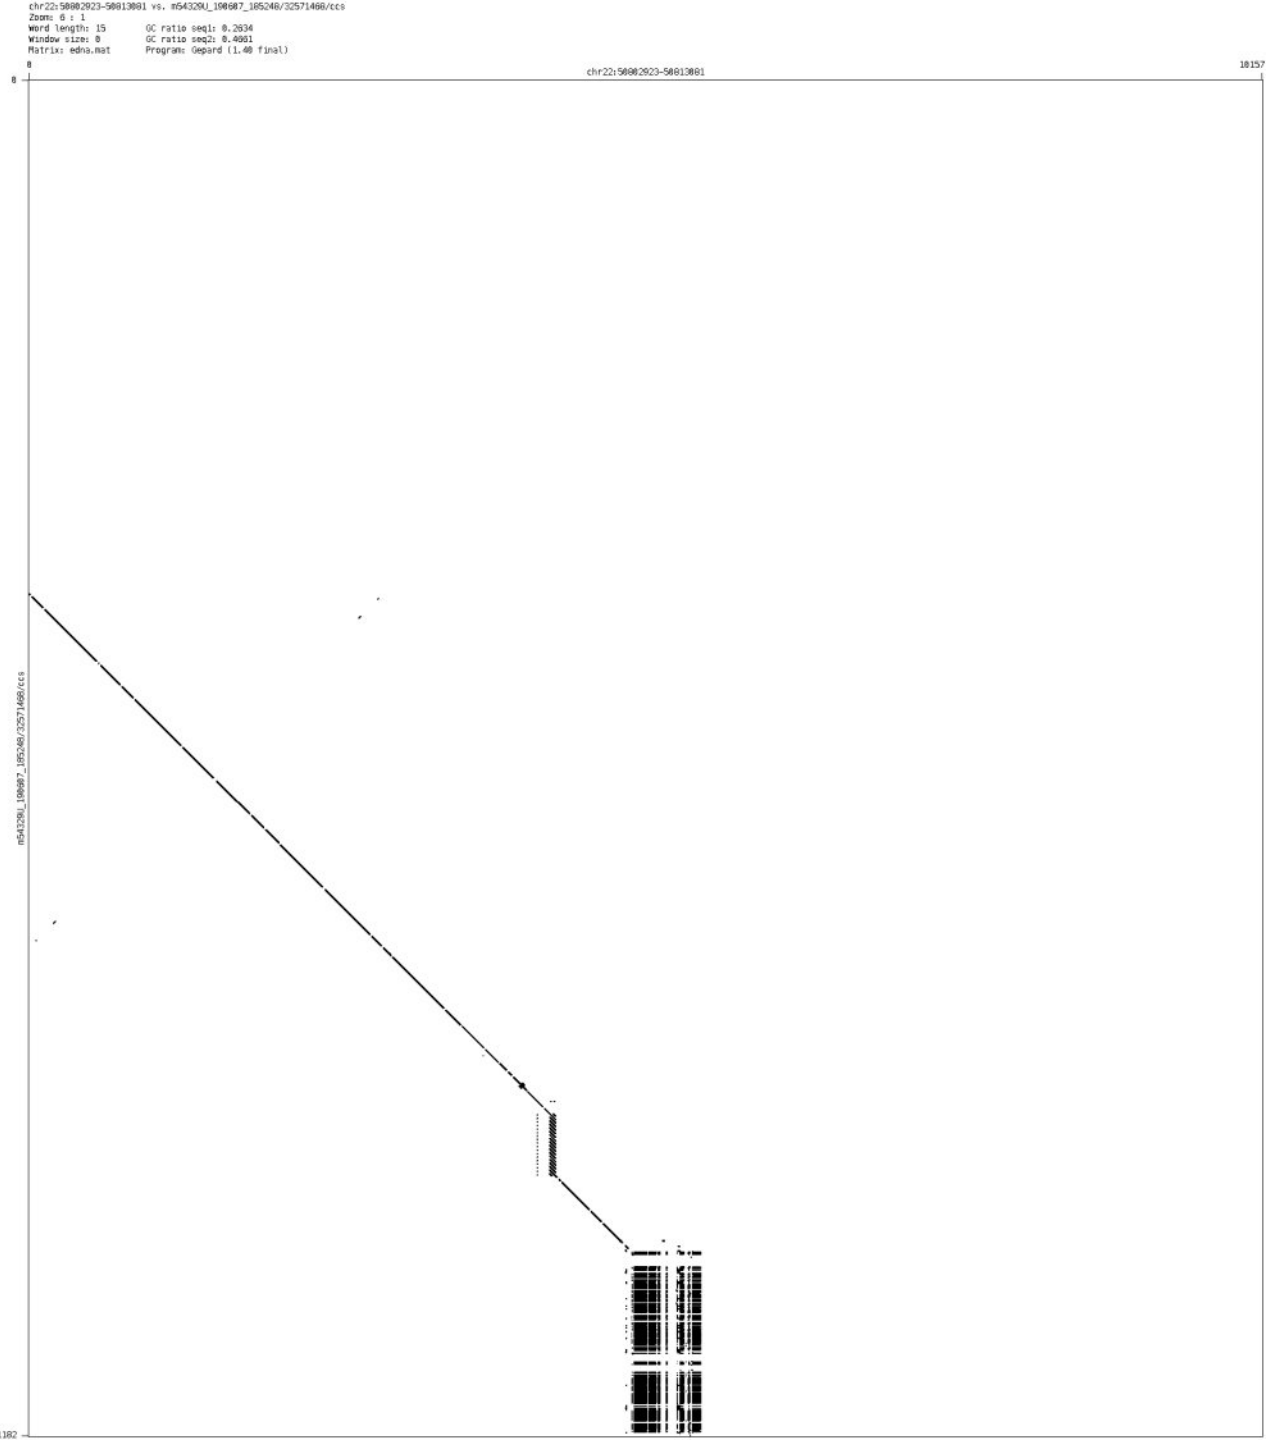

Supplement: mmc3.pdf [file mmc3.pdf]
